# Supplementary material for: Genetically tractable embryonic cell lines from sea urchins
Source: Research Square preprint supplement (doi:10.21203/rs.3.rs-5665288/v1), 2025-01-15
Supplement: Supplementary file 1 [file 301e76bc57c13b3697ff1fdd.xlsx]

## Sheet: Gastrula 5%FBS
Supplementary Table 11. Growth and viability of S. purpuratus embryonic cells (Gastrula-derived cultures in UM with 5% FBS maintained at 17℃)
Date	Experiment Day	Cell state	Cell Counts (hemocytometer)				Average cell counts	Cells/ml	Total cells	# cells seeded	Viability % live cells	Pop doubling	cumulative population doubling
			Ch1	Ch2	Ch3	Ch4
UM + 5% FBS - Sp_G1
2024-07-26	2	Live	7	7	8	9	7.75	155000	775000	618000	55.3571	0.3264	0.3264
		Dead	6	7	7	5	6.25
		Red	0	0	0	0	0
2024-07-30	6	Live	22	27	26	30	26.25	525000	2625000	775000	86.0656	1.75903	2.08543
		Dead	4	4	5	4	4.25
		Red	1	0	2	2	1.25
2024-08-02	9	Live	37	35	33	35	35	700000	3500000	2625000	89.7436	0.414797	2.50022
		Dead	5	3	3	5	4
		Red	2	1	0	0	0.75
2024-08-09	16	Live	16	12	14	12	13.5	270000	1350000	3500000	90	-1.3736	2.50022
		Dead	2	1	2	1	1.5
		Red	0	0	0	1	0.25
2024-08-13	23	Live	13	13	14	13	13.25	265000	1325000	1350000	88.3333	-0.0269514	2.50022
		Dead	1	0	3	3	1.75
		Red	0	0	1	0	0.25
2024-08-23	30	Live	8	13	15	10	11.5	230000	1150000	1325000	88.4615	-0.20424	2.50022
		Dead	2	1	1	2	1.5
		Red	0	0	0	0	0
2024-08-30	37	Live	15	16	10	11	13	260000	1300000	1150000	85.2459	0.176775	2.677
		Dead	1	2	3	3	2.25
		Red	0	1	0	0	0.25
2024-09-06	44	Live	5	5	3	7	5	100000	500000	1300000	74.0741	-1.37771	2.677
		Dead	2	1	1	3	1.75
		Red	0	0	0	0	0
2024-09-13	51	Live	5	4	5	3	4.25	85000	425000	500000	70.8333	-0.234329	2.677
		Dead	0	3	3	1	1.75
		Red	0	0	0	0	0
2024-09-20	58	Live	5	5	9	7	6.5	130000	650000	425000	83.871	0.612621	3.28962
		Dead	2	1	0	2	1.25
		Red	0	0	0	0	0
2024-09-27	65	Live	8	5	3	8	6	120000	600000	650000	80	-0.11541	3.28962
		Dead	1	1	2	2	1.5
		Red	0	0	0	0	0
2024-10-04	72	Live	9	3	10	6	7	140000	700000	600000	71.7949	0.222263	3.51188
		Dead	4	1	3	3	2.75
		Red	0	0	0	0	0
2024-10-11	79	Live	8	7	8	10	8.25	165000	825000	700000	78.5714	0.236902	3.74879
		Dead	0	4	3	2	2.25
		Red	0	0	0	0	0
2024-10-18	86	Live	6	6	7	5	6	120000	600000	825000	70.5882	-0.459165	3.74879
		Dead	1	2	5	2	2.5
		Red	1	0	0	0	0.25
2024-10-25	93	Live	12	15	17	11	13.75	275000	1375000	600000	80.8824	1.1957	4.94449
		Dead	2	0	9	2	3.25
		Red	0	0	0	0	0
2024-10-31	99	Live	5	8	8	10	7.75	155000	775000	1375000	64.5833	-0.826683	4.94449
		Dead	6	6	3	2	4.25
		Red	0	0	0	0	0
2024-11-08	107	Live	7	11	19	6	10.75	215000	1075000	775000	62.3188	0.471794	5.41628
		Dead	8	9	6	3	6.5
		Red	0	0	0	0	0
2024-11-15	114	Live	7	8	5	7	6.75	135000	675000	1075000	52.9412	-0.670988	5.41628
		Dead	8	4	7	5	6
		Red	0	0	0	0	0
2024-11-21	120	Live	6	9	5	11	7.75	155000	775000	675000	52.5424	0.199193	5.61548
		Dead	9	6	9	4	7
		Red	0	0	0	0	0
UM + 5% FBS - Sp_G2
2024-07-26	2	Live	7	6	4	9	6.5	130000	650000	618000	50.9804	0.0727906	0.0727906
		Dead	4	5	7	9	6.25
		Red	0	0	0	0	0
2024-07-30	6	Live	20	20	38	31	27.25	545000	2725000	650000	88.6179	2.06654	2.13934
		Dead	3	4	3	4	3.5
		Red	0	0	0	1	0.25
2024-08-02	9	Live	42	42	24	35	35.75	715000	3575000	2725000	89.375	0.39146	2.53079
		Dead	3	3	6	5	4.25
		Red	0	0	1	1	0.5
2024-08-09	16	Live	14	19	26	20	19.75	395000	1975000	3575000	92.9412	-0.855594	2.53079
		Dead	2	1	1	2	1.5
		Red	0	1	0	0	0.25
2024-08-16	23	Live	10	10	17	18	13.75	275000	1375000	1975000	93.2203	-0.522118	2.53079
		Dead	1	0	2	1	1
		Red	1	0	0	0	0.25
2024-08-23	30	Live	14	18	28	16	19	380000	1900000	1375000	83.5165	0.466297	2.99709
		Dead	4	2	6	3	3.75
		Red	2	0	1	0	0.75
2024-08-30	37	Live	12	15	8	22	14.25	285000	1425000	1900000	77.027	-0.414797	2.99709
		Dead	9	0	3	5	4.25
		Red	0	0	0	0	0
2024-09-06	44	Live	15	16	14	9	13.5	270000	1350000	1425000	75	-0.0779572	2.99709
		Dead	2	5	6	5	4.5
		Red	0	0	0	0	0
2024-09-13	51	Live	10	22	8	28	17	340000	1700000	1350000	73.1183	0.332382	3.32947
		Dead	8	6	7	4	6.25
		Red	0	1	0	1	0.5
2024-09-20	58	Live	4	7	12	9	8	160000	800000	1700000	69.5652	-1.08683	3.32947
		Dead	4	2	4	4	3.5
		Red	0	0	0	0	0
2024-09-27	65	Live	14	13	19	21	16.75	335000	1675000	800000	72.043	1.06547	4.39494
		Dead	7	4	6	9	6.5
		Red	0	1	0	0	0.25
2024-10-04	72	Live	16	20	35	21	23	460000	2300000	1675000	80.7018	0.457207	4.85215
		Dead	6	5	5	6	5.5
		Red	0	0	0	0	0
2024-10-11	79	Live	32	31	23	29	28.75	575000	2875000	2300000	80.4196	0.321741	5.17389
		Dead	7	8	4	9	7
		Red	0	0	0	0	0
2024-10-18	86	Live	19	25	23	25	23	460000	2300000	2875000	71.3178	-0.321741	5.17389
		Dead	13	5	9	10	9.25
		Red	0	0	0	0	0
2024-10-25	93	Live	25	32	67	42	41.5	830000	4150000	2300000	73.7778	0.850983	6.02488
		Dead	13	14	16	16	14.75
		Red	0	0	0	0	0
2024-10-31	99	Live	48	47	57	44	49	980000	4900000	3000000	84.4828	0.707408	6.73228
		Dead	8	15	12	1	9
		Red	0	0	0	0	0
2024-11-08	107	Live	153	147	117	153	142.5	2850000	14250000	3000000	92.6829	2.24662	8.97891
		Dead	9	9	17	10	11.25
		Red	0	0	0	0	0
2024-11-15	114	Live	65	73	63	75	69	1380000	6900000	3000000	86.5204	1.20094	10.1798
		Dead	13	8	12	10	10.75
		Red	0	0	0	0	0
2024-11-21	120	Live	74	87	91	93	86.25	1725000	8625000	3000000	95.0413	1.52268	11.7025
		Dead	5	6	5	2	4.5
		Red	0	0	0	0	0

## Sheet: Gastrula 10%FBS
Supplementary Table 11. Growth and viability of S. purpuratus embryonic cells (Gastrula-derived cultures in UM with 10% FBS maintained at 17℃)
Date	Experiment Day	Cell state	Cell Counts (hemocytometer)				Average cell counts	Cells/ml	Total cells	# cells seeded	Viability % live cells	Pop doubling	cumulative population doubling
			Ch1	Ch2	Ch3	Ch4
UM + 10% FBS - Sp_G1
2024-07-26	2	Live	12	9	8	11	10	200000	1000000	618000	76.9231	0.693918	0.693918
		Dead	2	2	2	6	3
		Red	0	0	0	0	0
2024-07-30	6	Live	26	46	44	30	36.5	730000	3650000	1000000	93.5897	1.86681	2.56073
		Dead	2	2	2	4	2.5
		Red	1	0	1	1	0.75
2024-08-02	9	Live	34	40	36	30	35	700000	3500000	3650000	89.172	-0.0605064	2.56073
		Dead	2	2	7	6	4.25
		Red	0	1	0	0	0.25
2024-08-09	16	Live	43	40	39	35	39.25	785000	3925000	3500000	92.8994	0.165242	2.72597
		Dead	3	3	2	4	3
		Red	2	0	0	1	0.75
2024-08-16	23	Live	22	29	30	34	28.75	575000	2875000	3925000	96.6387	-0.44887	2.72597
		Dead	0	1	1	2	1
		Red	0	0	1	0	0.25
2024-08-23	30	Live	46	53	32	50	45.25	905000	4525000	2875000	94.2708	0.653976	3.37995
		Dead	3	3	2	3	2.75
		Red	0	1	0	0	0.25
2024-08-30	37	Live	279	71	81	83	128.5	2570000	12850000	3000000	95.3618	2.09752	5.47746
		Dead	6	10	4	5	6.25
		Red	1	0	0	0	0.25
2024-09-06	44	Live	33	49	44	29	38.75	775000	3875000	3000000	90.1163	0.36902	5.84648
		Dead	3	4	5	5	4.25
		Red	0	0	0	0	0
2024-09-13	51	Live	91	63	121	91	91.5	1830000	9150000	3875000	90.3704	1.23886	7.08534
		Dead	7	13	13	6	9.75
		Red	0	0	0	0	0
2024-09-20	58	Live	51	71	90	98	77.5	1550000	7750000	3000000	90.379	1.36844	8.45378
		Dead	9	7	10	7	8.25
		Red	0	0	1	0	0.25
2024-09-27	65	Live	50	60	53	43	51.5	1030000	5150000	3000000	87.2881	0.779157	9.23294
		Dead	11	6	6	7	7.5
		Red	0	0	1	0	0.25
2024-10-04	72	Live	61	50	52	68	57.75	1155000	5775000	3000000	87.1698	0.94431	10.1772
		Dead	8	8	11	7	8.5
		Red	0	1	1	1	0.75
2024-10-11	79	Live	47	65	81	56	62.25	1245000	6225000	3000000	87.3684	1.0525	11.2297
		Dead	7	12	12	5	9
		Red	0	0	0	0	0
2024-10-18	86	Live	168	102	106	106	120.5	2410000	12050000	3000000	91.1153	2.00483	13.2346
		Dead	13	11	6	17	11.75
		Red	2	0	0	0	0.5
2024-10-25	93	Live	83	90	121	176	117.5	2350000	11750000	3000000	89.1841	1.96848	15.2031
		Dead	16	17	12	12	14.25
		Red	1	2	1	0	1
2024-10-31	99	Live	66	70	87	76	74.75	1495000	7475000	3000000	86.6667	1.31635	16.5194
		Dead	11	14	14	7	11.5
		Red	0	0	0	1	0.25
2024-11-08	107	Live	82	131	135	154	125.5	2510000	12550000	3000000	89.4831	2.06345	18.5829
		Dead	12	21	11	15	14.75
		Red	0	0	0	0	0
2024-11-15	114	Live	104	133	128	168	133.25	2665000	13325000	3000000	89.882	2.14985	20.7327
		Dead	20	14	8	18	15
		Red	0	1	0	0	0.25
2024-11-21	120	Live	108	102	107	112	107.25	2145000	10725000	3000000	88.4536	1.83688	22.5696
		Dead	14	13	14	15	14
		Red	1	1	0	0	0.5
UM + 10% FBS - Sp_G2
2024-07-26	2	Live	5	11	9	10	8.75	175000	875000	618000	74.4681	0.501385	0.501385
		Dead	4	5	0	3	3
		Red	0	0	0	0	0
2024-07-30	6	Live	16	20	21	21	19.5	390000	1950000	875000	95.122	1.15545	1.65683
		Dead	0	1	2	1	1
		Red	0	1	1	0	0.5
2024-08-02	9	Live	31	23	26	30	27.5	550000	2750000	1950000	88	0.49567	2.1525
		Dead	5	4	5	1	3.75
		Red	1	0	0	0	0.25
2024-08-09	16	Live	30	38	40	39	36.75	735000	3675000	2750000	86.4706	0.41807	2.57057
		Dead	9	4	5	5	5.75
		Red	0	0	1	0	0.25
2024-08-16	23	Live	51	55	72	59	59.25	1185000	5925000	3675000	94.4223	0.688671	3.25924
		Dead	4	5	3	2	3.5
		Red	0	0	0	1	0.25
2024-08-23	30	Live	43	30	44	31	37	740000	3700000	3000000	88.6228	0.302387	3.56163
		Dead	4	5	7	3	4.75
		Red	0	0	0	0	0
2024-08-30	37	Live	82	101	99	100	95.5	1910000	9550000	3700000	93.3985	1.36718	4.92881
		Dead	8	8	4	7	6.75
		Red	0	0	1	1	0.5
2024-09-06	44	Live	62	54	67	68	62.75	1255000	6275000	3000000	92.963	1.06404	5.99285
		Dead	3	7	3	6	4.75
		Red	0	0	0	0	0
2024-09-13	51	Live	71	70	68	84	73.25	1465000	7325000	3000000	89.0578	1.28712	7.27997
		Dead	6	8	8	14	9
		Red	0	0	0	0	0
2024-09-20	58	Live	72	56	79	94	75.25	1505000	7525000	3000000	90.3904	1.32596	8.60593
		Dead	12	7	9	4	8
		Red	0	0	0	2	0.5
2024-09-27	65	Live	57	74	70	60	65.25	1305000	6525000	3000000	85.0163	1.12036	9.72629
		Dead	16	9	12	9	11.5
		Red	2	0	1	1	1
2024-10-04	72	Live	53	58	44	57	53	1060000	5300000	3000000	87.6033	0.820553	10.5468
		Dead	5	4	9	12	7.5
		Red	0	0	0	1	0.25
2024-10-11	79	Live	51	44	53	77	56.25	1125000	5625000	3000000	87.2093	0.906364	11.4532
		Dead	7	5	9	12	8.25
		Red	0	0	0	0	0
2024-10-18	86	Live	38	40	62	64	51	1020000	5100000	3000000	84.2975	0.76509	12.2183
		Dead	10	8	10	10	9.5
		Red	0	0	0	1	0.25
2024-10-25	93	Live	89	82	107	95	93.25	1865000	9325000	3000000	87.7647	1.63519	13.8535
		Dead	24	14	4	10	13
		Red	2	0	0	0	0.5
2024-10-31	99	Live	62	78	67	85	73	1460000	7300000	3000000	87.4251	1.28219	15.1357
		Dead	8	14	13	7	10.5
		Red	1	0	0	0	0.25
2024-11-08	107	Live	92	144	140	157	133.25	2665000	13325000	3000000	90.1861	2.14985	17.2855
		Dead	15	13	12	18	14.5
		Red	0	1	0	2	0.75
2024-11-15	114	Live	145	134	152	188	154.75	3095000	15475000	3000000	91.7037	2.36553	19.6511
		Dead	10	18	17	11	14
		Red	0	0	1	1	0.5
2024-11-21	120	Live	125	151	144	168	147	2940000	14700000	3000000	91.7317	2.29145	21.9425
		Dead	12	14	14	13	13.25
		Red	0	0	0	0	0

## Sheet: Gastrula 15%FBS
Supplementary Table 11. Growth and viability of S. purpuratus embryonic cells (Gastrula-derived cultures in UM with 15% FBS maintained at 17℃)
Date	Experiment Day	Cell state	Cell Counts (hemocytometer)				Average cell counts	Cells/ml	Total cells	# cells seeded	Viability % live cells	Pop doubling	cumulative population doubling
			Ch1	Ch2	Ch3	Ch4
UM + 15% FBS - Sp_G1
2024-07-26	2	Live	8	8	12	14	10.5	210000	1050000	618000	82.3529	0.764267	0.764267
		Dead	1	2	3	3	2.25
		Red	0	0	0	0	0
2024-07-30	6	Live	19	22	16	25	20.5	410000	2050000	1050000	90.1099	0.964674	1.72894
		Dead	4	3	2	0	2.25
		Red	0	1	0	0	0.25
2024-08-02	9	Live	22	28	22	20	23	460000	2300000	2050000	87.619	0.165914	1.89485
		Dead	1	5	4	3	3.25
		Red	0	2	0	0	0.5
2024-08-09	16	Live	35	48	32	38	38.25	765000	3825000	2300000	85.4749	0.7334	2.62825
		Dead	5	6	7	8	6.5
		Red	0	0	0	0	0
2024-08-16	23	Live	45	51	43	45	46	920000	4600000	3825000	87.619	0.26602	2.89427
		Dead	5	10	5	6	6.5
		Red	0	0	0	1	0.25
2024-08-23	30	Live	56	72	83	88	74.75	1495000	7475000	3000000	90.6061	1.31635	4.21062
		Dead	6	10	8	7	7.75
		Red	0	0	1	0	0.25
2024-08-30	37	Live	92	231	118	118	139.75	2795000	13975000	3000000	94.9066	2.21853	6.42915
		Dead	7	10	7	6	7.5
		Red	0	0	0	0	0
2024-09-06	44	Live	102	98	115	98	103.25	2065000	10325000	3000000	93.018	1.78207	8.21122
		Dead	9	6	9	7	7.75
		Red	0	0	0	0	0
2024-09-13	51	Live	73	90	80	85	82	1640000	8200000	3000000	91.1111	1.44982	9.66104
		Dead	14	7	6	5	8
		Red	1	0	0	0	0.25
2024-09-20	58	Live	83	61	102	84	82.5	1650000	8250000	3000000	92.6966	1.45858	11.1196
		Dead	9	8	5	4	6.5
		Red	0	0	0	0	0
2024-09-27	65	Live	43	51	59	41	48.5	970000	4850000	3000000	87.7828	0.69262	11.8122
		Dead	6	7	9	5	6.75
		Red	0	0	0	0	0
2024-10-04	72	Live	52	50	67	70	59.75	1195000	5975000	3000000	89.1791	0.993399	12.8056
		Dead	10	5	6	8	7.25
		Red	0	0	0	0	0
2024-10-11	79	Live	45	52	56	77	57.5	1150000	5750000	3000000	89.4942	0.938055	13.7437
		Dead	6	5	9	7	6.75
		Red	1	0	1	0	0.5
2024-10-18	86	Live	22	49	73	76	55	1100000	5500000	3000000	86.9565	0.873962	14.6177
		Dead	7	10	7	9	8.25
		Red	0	0	1	2	0.75
2024-10-25	93	Live	141	125	131	100	124.25	2485000	12425000	3000000	89.5495	2.04902	16.6667
		Dead	15	18	10	15	14.5
		Red	1	0	0	2	0.75
2024-10-31	99	Live	67	64	80	69	70	1400000	7000000	3000000	90.3226	1.22168	17.8884
		Dead	7	10	7	6	7.5
		Red	0	0	0	1	0.25
2024-11-08	107	Live	79	106	123	141	112.25	2245000	11225000	3000000	89.98	1.90258	19.7909
		Dead	12	17	10	11	12.5
		Red	0	0	0	1	0.25
2024-11-15	114	Live	80	96	74	96	86.5	1730000	8650000	3000000	89.4057	1.52685	21.3178
		Dead	5	10	13	13	10.25
		Red	0	0	0	0	0
2024-11-21	120	Live	56	84	86	75	75.25	1505000	7525000	3000000	92.6154	1.32596	22.6437
		Dead	4	5	6	9	6
		Red	0	0	3	0	0.75
UM + 15% FBS - Sp_G2
2024-07-26	2	Live	6	9	11	13	9.75	195000	975000	618000	75	0.657414	0.657414
		Dead	4	3	1	5	3.25
		Red	0	0	0	0	0
2024-07-30	6	Live	12	18	21	25	19	380000	1900000	975000	93.8272	0.961967	1.61938
		Dead	1	2	1	1	1.25
		Red	1	0	0	0	0.25
2024-08-02	9	Live	22	17	32	23	23.5	470000	2350000	1900000	88.6792	0.306483	1.92586
		Dead	3	0	6	3	3
		Red	0	0	0	1	0.25
2024-08-09	16	Live	48	41	50	49	47	940000	4700000	2350000	89.5238	0.99942	2.92528
		Dead	6	5	5	6	5.5
		Red	0	1	0	1	0.5
2024-08-16	23	Live	37	36	38	36	36.75	735000	3675000	3000000	91.3043	0.292612	3.21789
		Dead	2	5	5	2	3.5
		Red	0	0	0	1	0.25
2024-08-23	30	Live	81	95	81	114	92.75	1855000	9275000	3675000	92.0596	1.33483	4.55272
		Dead	8	6	5	13	8
		Red	1	0	0	0	0.25
2024-08-30	37	Live	99	126	132	152	127.25	2545000	12725000	3000000	95.4972	2.08342	6.63614
		Dead	6	7	7	4	6
		Red	0	0	0	1	0.25
2024-09-06	44	Live	78	74	96	87	83.75	1675000	8375000	3000000	93.0556	1.48027	8.11641
		Dead	3	4	11	7	6.25
		Red	0	0	0	0	0
2024-09-13	51	Live	86	63	91	76	79	1580000	7900000	3000000	93.4911	1.39608	9.51249
		Dead	9	3	4	6	5.5
		Red	0	0	0	0	0
2024-09-20	58	Live	79	81	93	115	92	1840000	9200000	3000000	93.6387	1.61573	11.1282
		Dead	4	4	11	6	6.25
		Red	0	0	0	0	0
2024-09-27	65	Live	83	70	83	89	81.25	1625000	8125000	3000000	92.5926	1.43657	12.5648
		Dead	4	6	9	7	6.5
		Red	0	0	0	0	0
2024-10-04	72	Live	71	85	77	82	78.75	1575000	7875000	3000000	94.3114	1.39151	13.9563
		Dead	4	7	4	4	4.75
		Red	0	0	0	0	0
2024-10-11	79	Live	86	85	64	78	78.25	1565000	7825000	3000000	95.4268	1.38233	15.3386
		Dead	2	3	6	4	3.75
		Red	0	0	1	0	0.25
2024-10-18	86	Live	57	67	77	66	66.75	1335000	6675000	3000000	95.6989	1.15314	16.4918
		Dead	1	1	4	6	3
		Red	0	0	0	0	0
2024-10-25	93	Live	57	68	76	81	70.5	1410000	7050000	3000000	96.2457	1.23195	17.7237
		Dead	4	1	2	4	2.75
		Red	0	0	0	0	0
2024-10-31	99	Live	64	59	59	60	60.5	1210000	6050000	3000000	93.7984	1.01139	18.7351
		Dead	4	4	5	3	4
		Red	0	0	0	0	0
2024-11-08	107	Live	71	61	84	66	70.5	1410000	7050000	3000000	93.6877	1.23195	19.967
		Dead	2	5	7	5	4.75
		Red	0	0	2	0	0.5
2024-11-15	114	Live	85	67	84	86	80.5	1610000	8050000	3000000	91.2181	1.4232	21.3902
		Dead	5	10	10	6	7.75
		Red	0	0	0	0	0
2024-11-21	120	Live	55	53	53	68	57.25	1145000	5725000	3000000	93.8525	0.931772	22.322
		Dead	2	3	5	5	3.75
		Red	0	1	0	0	0.25

## Sheet: Gastrula 10%FBS RT
Supplementary Table 11. Growth and viability of S. purpuratus embryonic cells (Gastrula-derived cultures in UM with 10% FBS maintained at room temperature)
Date	Experiment Day at RT	Cell state	Cell Counts (hemocytometer)				Average cell counts	Cells/ml	Total cells	# cells seeded	Viability % live cells	Pop doubling	cumulative population doubling	Notes
			Ch1	Ch2	Ch3	Ch4
UM + 10% FBS - Sp_G1 RT
2024-09-13	51										90.3704		7.08534	*cells seeded from 10% FBS Sp-G1 flask at 17°C
2024-09-20	58	Live	20	42	39	45	36.5	730000	3650000	3000000	75.6477	0.28277	7.36811
		Dead	12	12	13	10	11.75
		Red	1	0	0	0	0.25
2024-09-27	65	Live	42	58	60	68	57	1140000	5700000	3650000	69.3009	0.642692	8.0108
		Dead	27	24	18	32	25.25
		Red	2	0	0	1	0.75
2024-10-04	72	Live	23	33	96	31	45.75	915000	4575000	3000000	68.0297	0.608456	8.61926
		Dead	23	18	26	19	21.5
		Red	0	0	0	0	0
2024-10-11	79	Live	33	20	36	57	36.5	730000	3650000	4575000	52.3297	-0.325686	8.61926
		Dead	20	32	41	40	33.25
		Red	0	0	0	0	0
2024-10-18	86	Live	66	61	54	75	64	1280000	6400000	3650000	47.1455	0.809705	9.42896
		Dead	67	68	80	72	71.75
		Red	0	0	0	0	0
2024-10-25	93	Live	31	21	40	38	32.5	650000	3250000	3000000	57.0175	0.11541	9.54437
		Dead	29	22	17	30	24.5
		Red	0	0	0	0	0
2024-10-31	99	Live	15	11	6	8	10	200000	1000000	3250000	27.027	-1.69945	9.54437
		Dead	28	15	23	42	27
		Red	0	0	0	0	0
2024-11-08	107	Live	16	27	23	31	24.25	485000	2425000	1000000	52.7174	1.27724	10.8216
		Dead	19	25	22	21	21.75
		Red	1	0	0	0	0.25
2024-11-15	114	Live	9	18	16	15	14.5	290000	1450000	2425000	32.0442	-0.741501	10.8216
		Dead	33	31	36	23	30.75
		Red	0	0	0	0	0
2024-11-21	120	Live	8	10	7	11	9	180000	900000	1450000	26.6667	-0.687657	10.8216
		Dead	22	26	18	33	24.75
		Red	0	0	0	0	0
UM + 10% FBS - Sp_G2 RT
2024-09-13	51										89.0578		7.27997	*cells seeded from 10% FBS Sp-G2 flask at 17°C
2024-09-20	58	Live	47	29	36	47	39.75	795000	3975000	3000000	76.4423	0.405757	7.68572
		Dead	17	14	4	14	12.25
		Red	0	0	0	0	0
2024-09-27	65	Live	29	36	70	51	46.5	930000	4650000	3975000	72.6562	0.226145	7.91187
		Dead	11	24	19	16	17.5
		Red	0	0	0	1	0.25
2024-10-04	72	Live	40	35	42	39	39	780000	3900000	3000000	62.1514	0.378292	8.29016
		Dead	26	22	21	26	23.75
		Red	0	0	1	0	0.25
2024-10-11	79	Live	37	22	30	23	28	560000	2800000	3900000	48.4848	-0.47777	8.29016
		Dead	15	36	32	36	29.75
		Red	0	0	1	1	0.5
2024-10-18	86	Live	45	34	49	44	43	860000	4300000	2800000	48.4507	0.618551	8.90871
		Dead	49	42	39	53	45.75
		Red	0	0	0	0	0
2024-10-25	93	Live	23	19	13	32	21.75	435000	2175000	3000000	38.6667	-0.463678	8.90871
		Dead	31	28	34	45	34.5
		Red	0	0	0	0	0
2024-10-31	99	Live	8	10	5	24	11.75	235000	1175000	2175000	31.3333	-0.887839	8.90871
		Dead	37	34	15	17	25.75
		Red	0	0	0	0	0
2024-11-08	107	Live	26	24	24	21	23.75	475000	2375000	1175000	51.9126	1.01468	9.92339
		Dead	18	21	31	18	22
		Red	0	0	0	1	0.25
2024-11-15	114	Live	15	14	17	16	15.5	310000	1550000	2375000	37.8049	-0.615302	9.92339
		Dead	33	16	31	22	25.5
		Red	0	0	0	0	0
2024-11-22	120	Live	10	9	6	9	8.5	170000	850000	1550000	32.0755	-0.86623	9.92339
		Dead	20	16	18	18	18
		Red	0	0	0	0	0

## Sheet: Gastrula 15%FBS RT
Supplementary Table 11. Growth and viability of S. purpuratus embryonic cells (Gastrula-derived cultures in UM with 15% FBS maintained at room temperature)
Date	Experiment Day at RT	Cell state	Cell Counts (hemocytometer)				Average cell counts	Cells/ml	Total cells	# cells seeded	Viability % live cells	Pop doubling	cumulative population doubling	Notes
			Ch1	Ch2	Ch3	Ch4
UM + 15% FBS - Sp_G1 RT
2024-09-13	51										91.1111		9.66104	*cells seeded from 15% FBS Sp-G1 flask at 17°C
2024-09-20	58	Live	24	26	27	42	29.75	595000	2975000	3000000	76.7742	-0.0120658	9.66104
		Dead	8	8	11	9	9
		Red	0	0	0	0	0
2024-09-27	65	Live	24	23	48	45	35	700000	3500000	2975000	70.3518	0.234329	9.89537
		Dead	21	10	14	14	14.75
		Red	0	0	0	0	0
2024-10-04	72	Live	23	40	38	30	32.75	655000	3275000	3500000	56.4655	-0.0958044	9.89537
		Dead	22	16	33	30	25.25
		Red	0	0	0	0	0
2024-10-11	79	Live	33	34	31	42	35	700000	3500000	3275000	56	0.0958044	9.99117
		Dead	27	24	31	28	27.5
		Red	0	0	0	0	0
2024-10-18	86	Live	36	33	30	28	31.75	635000	3175000	3500000	40.5751	-0.140517	9.99117
		Dead	43	41	42	60	46.5
		Red	0	0	0	0	0
2024-10-25	93	Live	25	37	54	40	39	780000	3900000	3175000	39.4937	0.296545	10.2877
		Dead	62	72	46	59	59.75
		Red	0	0	0	0	0
2024-10-31	99	Live	16	13	16	23	17	340000	1700000	3000000	27.8689	-0.818952	10.2877
		Dead	40	42	47	47	44
		Red	0	0	0	0	0
2024-11-08	107	Live	16	20	29	27	23	460000	2300000	1700000	46.4646	0.435846	10.7236
		Dead	28	18	31	29	26.5
		Red	0	0	0	0	0
2024-11-15	114	Live	6	9	14	12	10.25	205000	1025000	2300000	28.4722	-1.16533	10.7236
		Dead	19	24	20	40	25.75
		Red	0	0	0	0	0
2024-11-21	120	Live	13	14	14	16	14.25	285000	1425000	1025000	26.0274	0.475062	11.1986
		Dead	39	58	30	35	40.5
		Red	0	0	0	0	0
UM + 15% FBS - Sp_G2 RT
2024-09-13	51										93.4911		9.51249	*cells seeded from 15% FBS Sp-G2 flask at 17°C
2024-09-20	58	Live	23	25	30	33	27.75	555000	2775000	3000000	73.5099	-0.112409	9.51249
		Dead	10	11	12	7	10
		Red	0	0	0	0	0
2024-09-27	65	Live	18	21	23	23	21.25	425000	2125000	2775000	68.5484	-0.384801	9.51249
		Dead	13	8	8	10	9.75
		Red	0	0	0	0	0
2024-10-04	72	Live	14	19	13	23	17.25	345000	1725000	2125000	51.4925	-0.300692	9.51249
		Dead	16	15	18	16	16.25
		Red	0	0	0	0	0
2024-10-11	79	Live	10	19	22	21	18	360000	1800000	1725000	44.1718	0.0613649	9.57386
		Dead	27	20	26	18	22.75
		Red	0	0	0	0	0
2024-10-18	86	Live	6	10	11	10	9.25	185000	925000	1800000	35.2381	-0.959914	9.57386
		Dead	18	19	15	16	17
		Red	0	0	0	0	0
2024-10-25	93	Live	10	25	23	15	18.25	365000	1825000	925000	43.4524	0.979802	10.5537
		Dead	25	30	23	17	23.75
		Red	0	0	0	0	0
2024-10-31	99	Live	8	8	8	6	7.5	150000	750000	1825000	24.5902	-1.28219	10.5537
		Dead	23	27	17	25	23
		Red	0	0	0	0	0
2024-11-08	107	Live	4	5	4	4	4.25	85000	425000	750000	23.6111	-0.818952	10.5537
		Dead	6	17	20	12	13.75
		Red	0	0	0	0	0
2024-11-15	114	Live	4	2	2	5	3.25	65000	325000	425000	26.5306	-0.386798	10.5537
		Dead	9	8	11	8	9
		Red	0	0	0	0	0
2024-11-21	120	Live	1	3	2	3	2.25	45000	225000	325000	25.7143	-0.530207	10.5537
		Dead	5	5	8	8	6.5
		Red	0	0	0	0	0

## Sheet: 17C Gastrula Summary
Supplementary Table 11. Growth and viability of S. purpuratus embryonic cells (Summary of gastrula-derived cultures in UM with 5%, 10% or 15% FBS maintained at 17℃)
Cumulative Pop Doubling								Cell viability
Day	5% FBS G1	5% FBS G2	10% FBS G1	10% FBS G2	15% FBS G1	15% FBS G2		Day	5% FBS G1	5% FBS G2	10% FBS G1	10% FBS G2	15% FBS G1	15% FBS G2
2	0.3264	0.0727906	0.693918	0.501385	0.764267	0.657414		2	55.3571	50.9804	76.9231	74.4681	82.3529	75
6	2.08543	2.13934	2.56073	1.65683	1.72894	1.61938		6	86.0656	88.6179	93.5897	95.122	90.1099	93.8272
9	2.50022	2.53079	2.56073	2.1525	1.89485	1.92586		9	89.7436	89.375	89.172	88	87.619	88.6792
16	2.50022	2.53079	2.72597	2.57057	2.62825	2.92528		16	90	92.9412	92.8994	86.4706	85.4749	89.5238
23	2.50022	2.53079	2.72597	3.25924	2.89427	3.21789		23	88.3333	93.2203	96.6387	94.4223	87.619	91.3043
30	2.50022	2.99709	3.37995	3.56163	4.21062	4.55272		30	88.4615	83.5165	94.2708	88.6228	90.6061	92.0596
37	2.677	2.99709	5.47746	4.92881	6.42915	6.63614		37	85.2459	77.027	95.3618	93.3985	94.9066	95.4972
44	2.677	2.99709	5.84648	5.99285	8.21122	8.11641		44	74.0741	75	90.1163	92.963	93.018	93.0556
51	2.677	3.32947	7.08534	7.27997	9.66104	9.51249		51	70.8333	73.1183	90.3704	89.0578	91.1111	93.4911
58	3.28962	3.32947	8.45378	8.60593	11.1196	11.1282		58	83.871	69.5652	90.379	90.3904	92.6966	93.6387
65	3.28962	4.39494	9.23294	9.72629	11.8122	12.5648		65	80	72.043	87.2881	85.0163	87.7828	92.5926
72	3.51188	4.85215	10.1772	10.5468	12.8056	13.9563		72	71.7949	80.7018	87.1698	87.6033	89.1791	94.3114
79	3.74879	5.17389	11.2297	11.4532	13.7437	15.3386		79	78.5714	80.4196	87.3684	87.2093	89.4942	95.4268
86	3.74879	5.17389	13.2346	12.2183	14.6177	16.4918		86	70.5882	71.3178	91.1153	84.2975	86.9565	95.6989
93	4.94449	6.02488	15.2031	13.8535	16.6667	17.7237		93	80.8824	73.7778	89.1841	87.7647	89.5495	96.2457
99	4.94449	6.73228	16.5194	15.1357	17.8884	18.7351		99	64.5833	84.4828	86.6667	87.4251	90.3226	93.7984
107	5.41628	8.97891	18.5829	17.2855	19.7909	19.967		107	62.3188	92.6829	89.4831	90.1861	89.98	93.6877
114	5.41628	10.1798	20.7327	19.6511	21.3178	21.3902		114	52.9412	86.5204	89.882	91.7037	89.4057	91.2181
120	5.61548	11.7025	22.5696	21.9425	22.6437	22.322		120	52.5424	95.0413	88.4536	91.7317	92.6154	93.8525

## Sheet: Room Temp Gastrula Summary
Supplementary Table 11. Growth and viability of S. purpuratus embryonic cells (Summary of gastrula-derived cultures in UM with 10% or 15% FBS maintained at room temperature)
Cumulative Pop Doubling						Cell viability
Experiment Day	10% FBS G1 RT	10% FBS G2 RT	15% FBS G1 RT	15% FBS G2 RT		Experiment Day	10% FBS G1 RT	10% FBS G2 RT	15% FBS G1 RT	15% FBS G2 RT
51	7.08534	7.27997	9.66104	9.51249		51	90.3704	89.0578	91.1111	93.4911
58	7.36811	7.68572	9.66104	9.51249		58	75.6477	76.4423	76.7742	73.5099
65	8.0108	7.91187	9.89537	9.51249		65	69.3009	72.6562	70.3518	68.5484
72	8.61926	8.29016	9.89537	9.51249		72	68.0297	62.1514	56.4655	51.4925
79	8.61926	8.29016	9.99117	9.57386		79	52.3297	48.4848	56	44.1718
86	9.42896	8.90871	9.99117	9.57386		86	47.1455	48.4507	40.5751	35.2381
93	9.54437	8.90871	10.2877	10.5537		93	57.0175	38.6667	39.4937	43.4524
99	9.54437	8.90871	10.2877	10.5537		99	27.027	31.3333	27.8689	24.5902
107	10.8216	9.92339	10.7236	10.5537		107	52.7174	51.9126	46.4646	23.6111
114	10.8216	9.92339	10.7236	10.5537		114	32.0442	37.8049	28.4722	26.5306
120	10.8216	9.92339	11.1986	10.5537		120	26.6667	32.0755	26.0274	25.7143

## Sheet: All Gastrula Summary
Supplementary Table 11. Growth and viability of S. purpuratus embryonic cells (Summary of gastrula-derived cultures in UM with 5%, 10% or 15% FBS maintained at 17℃ and room temperature)
Cumulative Pop Doubling												Cell viability
Day	5% FBS G1	5% FBS G2	10% FBS G1	10% FBS G2	15% FBS G1	15% FBS G2	10% FBS G1 RT	10% FBS G2 RT	15% FBS G1 RT	15% FBS G2 RT		Day	5% FBS G1	5% FBS G2	10% FBS G1	10% FBS G2	15% FBS G1	15% FBS G2	10% FBS G1 RT	10% FBS G2 RT	15% FBS G1 RT	15% FBS G2 RT
2	0.3264	0.0727906	0.693918	0.501385	0.764267	0.657414						2	55.3571	50.9804	76.9231	74.4681	82.3529	75
6	2.08543	2.13934	2.56073	1.65683	1.72894	1.61938						6	86.0656	88.6179	93.5897	95.122	90.1099	93.8272
9	2.50022	2.53079	2.56073	2.1525	1.89485	1.92586						9	89.7436	89.375	89.172	88	87.619	88.6792
16	2.50022	2.53079	2.72597	2.57057	2.62825	2.92528						16	90	92.9412	92.8994	86.4706	85.4749	89.5238
23	2.50022	2.53079	2.72597	3.25924	2.89427	3.21789						23	88.3333	93.2203	96.6387	94.4223	87.619	91.3043
30	2.50022	2.99709	3.37995	3.56163	4.21062	4.55272						30	88.4615	83.5165	94.2708	88.6228	90.6061	92.0596
37	2.677	2.99709	5.47746	4.92881	6.42915	6.63614						37	85.2459	77.027	95.3618	93.3985	94.9066	95.4972
44	2.677	2.99709	5.84648	5.99285	8.21122	8.11641						44	74.0741	75	90.1163	92.963	93.018	93.0556
51	2.677	3.32947	7.08534	7.27997	9.66104	9.51249	7.08534	7.27997	9.66104	9.51249		51	70.8333	73.1183	90.3704	89.0578	91.1111	93.4911	90.3704	89.0578	91.1111	93.4911
58	3.28962	3.32947	8.45378	8.60593	11.1196	11.1282	7.36811	7.68572	9.66104	9.51249		58	83.871	69.5652	90.379	90.3904	92.6966	93.6387	75.6477	76.4423	76.7742	73.5099
65	3.28962	4.39494	9.23294	9.72629	11.8122	12.5648	8.0108	7.91187	9.89537	9.51249		65	80	72.043	87.2881	85.0163	87.7828	92.5926	69.3009	72.6562	70.3518	68.5484
72	3.51188	4.85215	10.1772	10.5468	12.8056	13.9563	8.61926	8.29016	9.89537	9.51249		72	71.7949	80.7018	87.1698	87.6033	89.1791	94.3114	68.0297	62.1514	56.4655	51.4925
79	3.74879	5.17389	11.2297	11.4532	13.7437	15.3386	8.61926	8.29016	9.99117	9.57386		79	78.5714	80.4196	87.3684	87.2093	89.4942	95.4268	52.3297	48.4848	56	44.1718
86	3.74879	5.17389	13.2346	12.2183	14.6177	16.4918	9.42896	8.90871	9.99117	9.57386		86	70.5882	71.3178	91.1153	84.2975	86.9565	95.6989	47.1455	48.4507	40.5751	35.2381
93	4.94449	6.02488	15.2031	13.8535	16.6667	17.7237	9.54437	8.90871	10.2877	10.5537		93	80.8824	73.7778	89.1841	87.7647	89.5495	96.2457	57.0175	38.6667	39.4937	43.4524
99	4.94449	6.73228	16.5194	15.1357	17.8884	18.7351	9.54437	8.90871	10.2877	10.5537		99	64.5833	84.4828	86.6667	87.4251	90.3226	93.7984	27.027	31.3333	27.8689	24.5902
107	5.41628	8.97891	18.5829	17.2855	19.7909	19.967	10.8216	9.92339	10.7236	10.5537		107	62.3188	92.6829	89.4831	90.1861	89.98	93.6877	52.7174	51.9126	46.4646	23.6111
114	5.41628	10.1798	20.7327	19.6511	21.3178	21.3902	10.8216	9.92339	10.7236	10.5537		114	52.9412	86.5204	89.882	91.7037	89.4057	91.2181	32.0442	37.8049	28.4722	26.5306
120	5.61548	11.7025	22.5696	21.9425	22.6437	22.322	10.8216	9.92339	11.1986	10.5537		120	52.5424	95.0413	88.4536	91.7317	92.6154	93.8525	26.6667	32.0755	26.0274	25.7143
