# Supplementary material for: Genetically tractable embryonic cell lines from sea urchins
Source: Research Square preprint supplement (doi:10.21203/rs.3.rs-5665288/v1), 2025-01-15
Supplement: Supplementary file 2 [file 3acd6eaf3cbefe6b952ae288.xlsx]

## Sheet: Lv_5FBS_Marker Gene Expression
Table S6 – Single-cell RNA sequencing of L. variegatus embryonic cells cultured in UM with 5% FBS - Marker gene expression
Gene ID	Cluster 0	Cluster 1	Cluster 2	Cluster 3	Cluster 4	Cluster 5	Cluster 6	Cluster 7	Cluster 8	Cluster 9	Cluster 10	Cluster 11	Gene Description
Skeletogenic Cell Markers (mesoderm)
LOC121406034	0.0418833	0.0180543	0.0713146	0.0833487	0.0354112	0	0	0.057507	0.0498192	2.16854	0	0	27_kDa_primary_mesenchyme-specific_spicule_protein-like
LOC121406020	0.0467115	0.0264536	0.022357	0.0136917	0.0143861	0.005157	0	0.0693633	0	1.85658	0	0.0701415	30_kDa_spicule_matrix_protein_alpha-like
LOC121405815	0.00892665	0	0	0	0.00400917	0.00628947	0.0346497	0	0.00934029	1.6622	0	0	34_kDa_spicule_matrix_protein
LOC121406031	0.0197885	0.0125734	0.0489017	0.074348	0.00138854	0.0160233	0.0949473	0.0154874	0	3.53903	0	0.0355109	34_kDa_spicule_matrix_protein-like
LOC121405817	0	0	0.00369212	0	0	0	0	0.0171858	0	0.224831	0	0	41_kDa_spicule_matrix_protein-like
LOC121427215	0.0165624	0.00970211	0	0.0794189	0.00811194	0.0709308	0	0.0521109	0.0137051	2.12761	0	0	mesenchyme-specific_cell_surface_glycoprotein-like
LOC121427467	0.00434324	0	0.00925527	0	0	0	0	0	0	0.256954	0	0	mesenchyme-specific_cell_surface_glycoprotein-like
LOC121428121	0.0199032	0.0160666	0.139048	0.305637	0.0186278	0	0.0948044	0.0588403	0	1.63669	0.0562797	0.151034	mesenchyme-specific_cell_surface_glycoprotein-like
LOC121427387	0.00508196	0	0	0	0.00326581	0	0.0132011	0	0	0.14982	0	0	mesenchyme-specific_cell_surface_glycoprotein-like
LOC121427724	0.0125938	0.00811217	0.114839	0.0369779	0	0.00872453	0.0381471	0	0.0203975	0	0	0	mesenchyme-specific_cell_surface_glycoprotein-like
Total Expression	0.175795	0.0909621	0.409408	0.593422	0.0852006	0.107125	0.27575	0.270495	0.0932621	13.6223	0.0562797	0.256687
Pigment Cell Markers (mesoderm)
LOC121428528	0.365419	0.153893	0.900736	0.776922	0.301354	0.26204	0.228044	0.176785	16.3142	0.528303	0.678961	0	probable_polyketide_synthase_1
LOC121418887	0.12169	0.0483044	0.100893	0.207682	0.206751	0.0510658	0.0379615	0.183706	1.28736	0.133165	0.175698	0.288024	homeobox_protein_six1-like
Total Expression	0.487109	0.202198	1.00163	0.984604	0.508104	0.313106	0.266006	0.36049	17.6016	0.661467	0.854659	0.288024
Immune Cell Markers (mesoderm)
LOC121423318	0.0753185	0.0556815	0.0331229	0.872724	0.0823224	0.0657253	0.0296581	0.0872226	0.0791568	0.259108	0.0417455	0.530051	antiviral_innate_immune_response_receptor_RIG-I-like
LOC121424758	0.404672	0.2369	0.4273	2.65454	0.471462	0.69887	2.5357	0.0231434	0.755382	1.48041	0.465665	1.44977	antiviral_innate_immune_response_receptor_RIG-I-like
LOC121429221	0.017508	0.0166651	0.0501544	0.0791489	0.0385462	0.0614215	0.248401	0.0703972	0.097864	0.515845	0	0	antiviral_innate_immune_response_receptor_RIG-I-like
LOC121429836	0.0610488	0.0362129	0.0800707	0.160182	0.080583	0.210035	0.217761	0	0.0306176	0.257359	0	0	B-cell_CLL/lymphoma_6_member_B_protein-like
LOC121408239	0.817525	0.41073	0.769085	0.53221	1.08105	0.63633	0.369364	1.04179	1.31138	0.862859	0.669904	0.642657	B-cell_CLL/lymphoma_7_protein_family_member_B-A-like
LOC121410653	0.134887	0.21362	0.100943	0.341427	0.109603	0.469987	0.463614	0.0343117	0.10693	0.317725	0.154271	0.443329	myeloid_differentiation_primary_response_protein_MyD88-like
LOC121427405	0.853769	0.726587	0.710944	0.69234	0.957806	0.645733	0.761244	0.977182	0.955326	0.828691	0.943901	0.501822	myeloid_leukemia_factor_2-like
LOC121415046	0.245459	0.360198	0.187268	0.22171	0.367285	0.62685	0.19113	0.354137	0.387818	0.369217	0.391107	0.500691	myeloid-derived_growth_factor-like
LOC121422399	0.034512	0.120864	0.029417	0	0.0103089	0.0704769	0.108862	0	0.0243361	0	0.246283	0	scavenger_receptor_cysteine-rich_domain_superfamily_protein-like
LOC121407539	0.0152552	0.0104865	0.00739022	0	0.0207578	0.0623983	0	0	0.00868551	0.00915024	0	0	scavenger_receptor_cysteine-rich_domain_superfamily_protein-like
LOC121418958	0	0.0169846	0	0	0	0	0.104945	0	0	0	0	0	scavenger_receptor_cysteine-rich_domain_superfamily_protein-like
LOC121430492	0.236983	0.368377	0.257459	0.722028	0.229695	0.460841	0.560031	0.284658	0.26349	1.06211	0.311187	0.5578	scavenger_receptor_cysteine-rich_domain_superfamily_protein-like
LOC121430969	0	0.00438563	0.0346861	0.00177889	0	0	0	0	0.108693	0.187441	0	0	scavenger_receptor_cysteine-rich_domain_superfamily_protein-like
LOC121405657	0	0	0	0	0	0	0	0	0	0.0343876	0	0	scavenger_receptor_cysteine-rich_domain_superfamily_protein-like
LOC121419637	0.00931567	0.0109609	0	0.0456929	0	0	0	0	0	0.00902525	0	0	scavenger_receptor_cysteine-rich_domain-containing_group_B_protein-like						scavenger_receptor_cysteine-rich_domain-containing_group_B_protein-like
LOC121423765	0.0666769	0.0743186	0.100966	0.276167	0.055661	0.0604846	0.0978076	0.121231	0.0434036	0.174718	0.2548	0.130178	scavenger_receptor_cysteine-rich_domain-containing_group_B_protein-like
LOC121407742	0.0229849	0.0746554	0.00383705	0	0.00943506	0.0790524	0.201118	0	0.0390998	0.067956	0.125466	0	scavenger_receptor_cysteine-rich_type_1_protein_M130-like
LOC121414099	0	0.0338205	0	0	0.00431987	0.0350921	0	0	0	0.0476104	0	0	scavenger_receptor_cysteine-rich_type_1_protein_M130-like
LOC121415100	0.000722716	0.0875426	0.00357707	0	0.00730556	0.0564307	0.0160091	0	0	0	0.0562797	0	scavenger_receptor_cysteine-rich_type_1_protein_M130-like
LOC121405934	1.12736	1.19193	1.1713	0.952655	0.843636	2.0972	1.82822	0.699226	1.01201	1.59653	2.02376	0.835668	toll-interacting_protein-like
LOC121429315	0	0	0	0.0295257	0	0	0	0	0	0	0	0.144896	toll-like_receptor_3
LOC121407805	0	0	0	0	0.00319125	0	0	0	0	0	0	0.27587	toll-like_receptor_3
LOC121411011	0.00407319	0.0012283	0.0346488	0	0	0.0455365	0.035063	0	0	0.0135645	0	0	toll-like_receptor_3
LOC121412631	0	0	0	0	0.00495041	0	0	0	0	0.0311337	0	0	toll-like_receptor_3
LOC121415541	0	0	0	0	0	0	0	0	0	0	0	0.0479246	toll-like_receptor_3
LOC121422461	0.104108	0.0292527	0.133786	0.328779	0.0871887	0.0162665	0.102558	0	0.0645544	0.103123	0.242334	0.466625	toll-like_receptor_3
LOC121427964	0	0	0	0	0	0	0	0	0	0.0133804	0	0	toll-like_receptor_3
LOC121425855	0.00248018	0	0	0.0226351	0	0	0	0	0.0273781	0.320275	0	0	toll-like_receptor_6
LOC121422122	0.123223	0.0113261	0.0623578	0.0849637	0.0533721	0.0644229	0	0.156856	0.0699654	2.16974	0	0.163397	complement_C1q_tumor_necrosis_factor-related_protein_2-like
LOC121410559	0.0543573	0.00257462	0.0182234	0.026166	0.0407064	0.0309863	0	0.0611942	0	0.0699727	0	0.109535	complement_C1q_tumor_necrosis_factor-related_protein_3-like
LOC121414735	0.312132	0.0782232	0.379851	0.142799	0.200708	0.00901505	0.15817	0.269187	0.0453154	0.153891	1.03054	0.0697773	complement_C1q_tumor_necrosis_factor-related_protein_4-like
LOC121425687	0.0119623	0.00417702	0.153057	0.0992256	0.0263686	0	0.0215432	0.0248227	0	0.00859104	0	0	complement_C1q_tumor_necrosis_factor-related_protein_7-like
LOC121428574	0.00885589	0.00949196	0	0	0.012157	0.086715	0	0	0	0	0	0	complement_C2-like
LOC121417165	0.0154988	0.0106647	0.124729	0.181084	0.0388566	0.0195598	0	0	0	1.23916	0.175519	0.0626735	complement_C3-like
LOC121428641	0.198902	0.374985	0.0309631	0.170248	0.188793	0.174833	0.354579	0.0654062	0.927936	0.223853	0.0378384	0	complement_C3-like
LOC121429261	0.00169816	0	0.00186129	0	0	0	0	0	0	0.0260974	0	0	complement_factor_B-like
LOC121424089	0.0131286	0.00357259	0.00270123	0.0861751	0.00185644	0.00586372	0	0	0	0	0	0	complement_factor_H-like
LOC121427693	0.00478985	0.00705679	0.00270803	0	0.00706034	0.0759962	0.0132011	0	0.0189499	0.0784811	0	0.140283	complement_factor_H-like
LOC121409134	0	0	0.0329761	0	0	0.0451351	0	0	0.067236	0	0	0	echinoidin-like
LOC121413901	0.00436504	0	0.0453487	0	0	0	0	0	0	0	0	0	echinoidin-like
LOC121413965	0.0133449	0.0297109	0	0.0321653	0.00218656	0.0113198	0.0262972	0.0746098	0	0	0	0	echinoidin-like
LOC121426882	0.00526337	0	0	0.0292767	0	0	0	0	0	0.102407	0	0	echinoidin-like
LOC121427330	0	0	0.00130309	0	0	0	0.0491273	0	0	0.145865	0	0.0701415	echinoidin-like
LOC121429941	0	0	0	0	0	0	0	0	0	0.0939725	0	0.0626735	echinoidin-like
LOC121429883	0.00727146	0	0.00462084	0	0	0	0.0168611	0	0	0.273718	0	0	echinoidin-like
LOC121407054	0.0545911	0.00894394	0.125789	0.11159	0.0481392	0	0.0325	0	0.0149526	0.0140831	0	0	erythroid_differentiation-related_factor_1-like
LOC121407251	0.113222	0.0400877	0.116428	0.199656	0.0442618	0.00574744	0	0	0.0302064	0.0124772	0.0288478	0	erythroid_differentiation-related_factor_1-like
Total Expression	5.17726	4.66222	5.23887	9.09689	5.12957	6.92832	8.54377	4.34537	6.49069	13.1739	7.19944	7.20576
Muscle Cell Markers (mesoderm)
LOC121423582	0.445223	0.410513	0.506777	0.684667	0.366847	0.824351	0.787301	0.165831	0.219092	0.289212	0.499679	0.180061	muscle,_skeletal_receptor_tyrosine-protein_kinase-like
LOC121425834	2.87177	0.671418	22.3338	11.6253	1.73587	1.04213	1.86765	0.672848	0.234615	0.64852	2.23973	0.952818	muscle_M-line_assembly_protein_unc-89-like
LOC121429542	2.06644	1.33592	1.89226	2.18802	1.68559	1.0985	1.77877	0.673365	0.781538	0.944853	0.652273	5.85119	muscleblind-like_protein_3
LOC121423729	2.3543	1.36863	2.89663	2.22528	2.44233	2.59099	1.67604	2.53081	1.55147	1.52621	2.63068	3.43376	muscle-specific_protein_20-like
LOC121423883	0.265179	1.40066	0.143452	0.133218	0.214485	1.03706	0.857314	0.15427	0.326712	0.829964	0.427636	0.396977	muscle-specific_protein_20-like
LOC121423749	0.374253	1.39867	0.182679	0.138065	0.296865	0.863274	0.673732	0.338419	0.358008	1.2913	0.472652	0.603975	muscle-specific_protein_20-like
LOC121423027	0.155582	0.225668	0.506729	0.325685	0.0849475	0.279688	0.182218	0.348464	0.3985	0.346132	0.357966	0.222587	myocardin-related_transcription_factor_A-like
LOC121414041	0.0855246	0.0563531	2.24804	0.153301	0.0785793	0.0639274	0.00539348	0.198266	0.0641216	0.185599	0	0.134915	myophilin-like
LOC121408547	0.574748	0.171114	1.87739	3.14908	0.619564	0.280543	0.601984	0.0969351	0.107494	0.306191	0.341319	0.273854	myosin_heavy_chain,_striated_muscle-like
LOC121411529	0.0415163	0.0484119	0.909472	0.194081	0.0231273	0.0155104	0.0480042	0.0318573	0	0.0364382	0	0	myosin_light_chain_3,_skeletal_muscle_isoform-like
LOC121424934	0.690363	0.502701	31.7077	4.23083	0.583756	1.09161	1.45582	1.4462	0.752578	1.37066	0.414565	2.60549	myosin_light_chain_kinase,_smooth_muscle-like
LOC121425215	0.490109	1.93218	0.159085	0.958471	0.245209	0.588624	2.27374	0.163374	0.0642665	1.07853	0.375112	0.183077	myosin_light_chain_kinase,_smooth_muscle-like
LOC121430536	3.46848	5.33589	1.90121	2.17585	3.46424	4.74558	3.29881	3.23597	6.95256	3.87565	3.25374	3.57525	myosin_regulatory_light_chain_2,_smooth_muscle_minor_isoform-like
LOC121421431	1.35114	1.39214	1.16157	1.19344	1.36599	1.86037	1.47083	1.82543	1.6681	2.25626	1.27902	3.40819	myotrophin-like
LOC121423932	0.0155745	0.0267884	0.0786295	0	0.0203361	0.00328109	0.126326	0.0282231	0.0268624	0.00877409	0	0.0264497	dystrophin,_isoforms_A/C/F/G/H-like
LOC121413102	0.0739878	0.0654546	0.117281	0.253571	0.0570071	0.0267131	0.0734645	0.0133623	0.00721969	0.0364549	0.0854498	0	dystrophin-like
LOC121413111	0.05943	0.0238671	0.111693	0.0464014	0.0491589	0.0624453	0.270591	0.0116629	0	0.0316141	0.159004	0.0305822	dystrophin-like
LOC121414389	0.00582566	0.0183246	0.00596151	0.0440637	0.0025417	0	0	0	0	0.00485742	0	0	dystrophin-like
LOC121414390	0.0112543	0.0101219	0.0420046	0.0102214	0.0105653	0	0.0511208	0	0	0	0	0	dystrophin-like
LOC121414391	0.182695	0.183043	0.261127	0.548447	0.20007	0.0354984	0.160228	0.15079	0.0276107	0.0887709	0	0	dystrophin-like
LOC121414482	0.112866	0.0988287	0.130849	0.162526	0.0748305	0.0397531	0.210721	0.0846424	0.0307949	0.0281696	0.0426165	0	dystrophin-like
LOC121421575	0.00685587	0	0.0972688	0.074536	0.00551575	0.00377203	0	0	0	0	0	0	troponin_T,_cardiac_muscle_isoforms-like
LOC121421639	0.00421251	0	0.0325182	0	0	0	0	0	0	0	0	0	troponin_T,_cardiac_muscle_isoforms-like
LOC121421806	0.0599958	0.135734	0.0140586	0.0825748	0.0613954	0	0.162404	0.0740897	0.0117217	0.0137294	0.0791615	0	troponin_T,_skeletal_muscle-like
LOC121420945	0.110535	0.15904	0.071971	0.120471	0.149562	0.0345464	0.197205	0.140564	0.0191575	0.0134237	0.0417455	0	troponin_T,_skeletal_muscle-like
Total Expression	15.8779	16.9715	69.3901	30.7181	13.8384	16.5882	18.2297	12.3854	13.6024	15.2113	13.3524	21.8792
Neuronal Cell Markers (Ectoderm)
LOC121430133	0.0914649	4.07691	0.242229	0.630311	0.0956953	1.96924	2.64434	0.302969	0.184735	0.131967	0.289784	0.0512195	transcription_factor_Sox-2-like
LOC121420114	0.935548	1.85641	2.28734	1.74521	0.903396	1.02912	2.96853	0.586933	0.0151227	0.327558	12.4951	0.140513	amyloid-like_protein_1
LOC121419935	0.0177033	0.0542272	0.0196347	0.0730281	0.0306375	0.0826256	0.130953	0.0191564	0	0.0314826	0.0303856	0.0256873	neural_cell_adhesion_molecule_1-like
LOC121420039	0.108522	0.261701	0.191508	0.325317	0.115798	0.31237	0.269754	0.129573	0.0276499	0.0286427	0.0485112	0.196374	neural_cell_adhesion_molecule_1-like
LOC121420426	0.0172727	0.0426359	0.00573743	0.127903	0.0285276	0.0856583	0.0830945	0	0.033681	0.0125241	0	0	neural_cell_adhesion_molecule_L1-like
LOC121429231	0.049549	0.0189973	0.101482	0.0578307	0.0330941	0.101553	0.0815246	0	0.37448	0.0188077	0.827704	0	neural_proliferation_differentiation_and_control_protein_1-like
LOC121410776	0.398394	0.266759	0.288781	0.646814	0.291584	0.514624	0.356051	0.373944	0.468934	0.979577	0.572707	1.15024	neural_Wiskott-Aldrich_syndrome_protein-like
LOC121427416	0.12138	0.0896483	0.202097	0.270935	0.0675541	0.131612	0.124403	0.0819749	0.114607	0.195902	0.209804	0.153245	neuralized-like_protein_4
LOC121418785	0.0547009	0.0182502	0.7413	0.467202	0.0853127	0.200681	0.106781	0.10603	0.0176462	0.00604436	0.600126	0.0821443	neurexin-3a-like
LOC121410654	0.279657	0.839571	0.612714	0.610318	0.169599	0.596569	1.29219	0.150748	0.00721969	0.157314	0.426704	0.123921	neurexin-4-like
LOC121431448	0.0048618	0.0193085	0.0579636	0.139395	0.00868546	0	0	0	0	0.321693	0	0	neurexin-4-like
LOC121412155	0.0863809	0.154607	0.315546	0.401233	0.0857233	0.18845	0.315506	0.0757984	0.125592	0.138494	0.667894	0	neurobeachin-like
LOC121412231	0.0981992	0.0705724	0.249264	0.678607	0.0567218	0.174884	0.279371	0.0385779	0.150671	0.10381	0.292127	0.0410721	neurobeachin-like
LOC121425792	0.0794957	0.0646283	0.10357	0.229019	0.0463802	0.270554	0.0930786	0	0.174933	0.100506	0.0909532	0	neurobeachin-like_protein_1
LOC121418701	1.23947	13.2057	3.53082	2.4307	1.01595	7.47418	13.157	1.02149	0.355236	0.713841	1.92469	0.315798	neuroblast_differentiation-associated_protein_AHNAK-like
LOC121424809	1.5793	0.143525	0.964092	3.02822	1.4273	0.227938	0.249462	0.840037	0.134715	0.222675	0.29284	0.324186	neuroblast_differentiation-associated_protein_AHNAK-like
LOC121415410	0.138294	0.0859413	0.329751	0.493581	0.189687	0.098465	0.28001	0.0150699	0.063712	0.246172	0.138502	0.178541	neuroblastoma-amplified_sequence-like
LOC121408274	0.0076664	0.0740119	0.0265948	0.0212239	0.00367313	0.212463	0.0690654	0	0	0	0	0.0701415	neurocalcin_homolog
LOC121430553	0.689224	0.71262	1.13354	0.901964	0.655581	0.714297	0.945305	0.653082	2.21245	0.816947	7.55165	0.616061	neurocalcin_homolog
LOC121409194	0.00613807	0.13726	0.00174613	0.0307005	0.00669698	0.0343364	0.193854	0	0.726518	0.0703931	0.0622669	0.43728	cyclic_nucleotide-gated_channel_cone_photoreceptor_subunit_alpha-like
LOC121419326	0.0026635	0.00209796	0.0973459	0	0	0	0	0	0	0.0259845	0	0	cyclic_nucleotide-gated_channel_rod_photoreceptor_subunit_alpha-like
LOC121417824	0.00742201	0.0105338	0.0162047	0	0.00584157	0	0.0346497	0.013289	0.0306176	0.0107386	0	0	neurocan_core_protein-like
LOC121415184	0.00217495	0.00810752	0.0484816	0.0381983	0.0110824	0.0327545	0.0187027	0	0.0203336	0.0135108	0	0	neurochondrin-like
LOC121415206	0.0571366	0.0185549	0.0205709	0.0843592	0.0262103	0.0462989	0.0593162	0	0.0468399	0.0166231	0.0281277	0.0264497	neurochondrin-like
LOC121408157	0.176352	0.145318	0.429558	0.566206	0.193665	0.133349	0.522366	0.164719	0.204254	0.228637	0.245512	0.602448	neurofibromin-like
LOC121424392	0.220577	0.534777	0.137699	0.833862	0.193688	0.578668	0.936071	0.211703	0.0850859	0.457169	0.281597	0.0884103	neurofilament_heavy_polypeptide-like
LOC121432068	0.393733	0.270282	0.688015	0.866356	0.328332	0.189884	0.729913	0.11247	0.118177	0.528602	0.2306	0.0305822	neurofilament_heavy_polypeptide-like
LOC121425197	0.00423472	0.0624035	0.0662209	0.201364	0.00458903	0.0417606	0.0546459	0.0108469	0.0260025	0.00485742	0.0288478	0	neurofilament_medium_polypeptide-like
LOC121406041	0.374027	0.317267	0.672754	0.738099	0.411641	0.525617	1.11629	0.149317	0.103532	0.237334	1.05695	0.354878	neuron_navigator_2-like
LOC121405822	0.166474	0.147835	0.687594	0.929908	0.105448	0.181287	0.362073	0.0117549	0.0608595	0.171022	0.908502	0.248075	neuron_navigator_2-like
LOC121406089	0.0401229	0.0329553	0.221377	0.15997	0.0119043	0.00680091	0.114519	0	0.0870933	0.0312281	0.173389	0.196374	neuron_navigator_3-like
LOC121428446	0.182014	0.527762	0.563898	0.309393	0.149286	0.527665	0.343861	0.26742	0.111107	0.0646082	0.494668	0.0922917	neuronal_calcium_sensor_1-like
LOC121429319	0.0614872	0.219252	0.223656	0.229381	0.0440736	0.0743884	0.158258	0.125827	1.02248	0.0441931	0.112559	0.485918	neuronal_calcium_sensor_1-like
LOC121410924	0.646383	0.831785	3.22179	1.793	0.600298	1.18031	1.1718	0.747083	0.115848	0.96159	9.89197	0.324533	neuronal_cell_adhesion_molecule-like
LOC121422572	0.0488211	0.594265	0.0755187	0.258601	0.0416885	0.110234	0.465173	0.102369	0.607943	0.708167	0.0455784	0.904736	neuronal-specific_septin-3-like
LOC121408332	0	0	0	0	0	0.0213223	0	0	0.0518956	0	0	0	neuropeptide_Y_receptor_type_1-like
LOC121425420	0.0350772	0.00369078	0.362313	0.277911	0.0134891	0.0661707	0	0	0.030113	0.0397957	0.351727	0.0410721	neuropeptide_Y_receptor_type_2-like
LOC121428023	0.00631696	0.179086	0.00513173	0.0317447	0.00644996	0.00685045	0.151188	0	0.320436	0	0.185605	0	neuropeptide_Y_receptor_type_6-like
LOC121419206	0	0.014848	0.103656	0.33772	0.00769597	0.0665587	0.0600568	0	0	0	2.35792	0	neuropeptides_capa_receptor-like
LOC121405992	0.00524032	0	0.00701957	0.0696153	0	0	0	0	0	0.00473666	0	0	neuropeptides_capa_receptor-like
LOC121410940	0	0	0	0	0	0	0	0	0	0.12016	0.0413232	0.0479246	neuropeptides_capa_receptor-like
LOC121411198	0.00201066	0.00229437	0.015093	0	0.0203716	0	0	0	0	0.699556	0	0.193428	neuropeptides_capa_receptor-like
LOC121409622	0.315935	0.288182	0.264319	0.0707271	0.176336	0.0716964	0.120992	0.324401	0.360032	0.144483	0.376974	0.049017	neurotrypsin-like
LOC121410293	0.0521333	0.075617	0.0868608	0.0379478	0.0663138	0.0391272	0	0.0401847	0.21563	0.0868756	0.292055	0	neurotrypsin-like
LOC121414889	0.021563	0.0142718	0.0175574	0.0503957	0.0226317	0.0160233	0	0	0.0458	0.0409334	0.0281318	0.034006	neurotrypsin-like
LOC121415934	0.0691432	0.0604363	0.0755105	0.248297	0.0916736	0.102477	0	0.143204	0.0928176	0.0850502	0.0440406	0.0305822	neurotrypsin-like
LOC121415959	0.103182	0.123968	0.107997	0.22541	0.123265	0.116712	0.0257908	0.187832	0.0265937	0.052316	0.113147	0	neurotrypsin-like
LOC121431784	0.0131244	0.167106	0.0128958	0.0269687	0.0233743	0.76752	0.772226	0.028612	0	0.0249291	0	0	neurotrypsin-like
LOC121431718	0.0101804	0.0201579	0.064892	0.0276192	0.02962	0.0078707	0.0209818	0.0335098	0.0939706	0.0141168	0.0303856	0	neurotrypsin-like
LOC121428781	0.0579836	0.191814	0.0237211	0	0.0285656	0.388781	0.229003	0	0.022261	0	0	0	NMDA_receptor_synaptonuclear_signaling_and_neuronal_migration_factor-like
LOC121431038	0.0239437	0.0101075	0.183808	0.160876	0.0299295	0	0.0381471	0	0	0	0.0636911	0	regulating_synaptic_membrane_exocytosis_protein_2-like
LOC121417021	0.0387056	0.0270354	0.298482	0.482805	0.0860711	0.00933609	0	0.0144662	0	0.08319	0.36416	0	regulating_synaptic_membrane_exocytosis_protein_2-like
LOC121417056	0.261582	0.0345572	0.975202	1.11783	0.176795	0.0393272	0.129664	0.126417	0.0172761	0.0177053	3.20648	0.109535	regulating_synaptic_membrane_exocytosis_protein_3-like
LOC121430086	0.160036	0.196787	0.472572	0.937692	0.168198	0.217216	0.37683	0.124804	0.268268	0.205683	0.295173	0.109084	semaphorin-1A-like
LOC121415379	0.254717	0.322363	0.715769	0.885863	0.281545	0.732175	0.563984	0.14949	0.989135	0.371773	1.29704	2.93216	semaphorin-1A-like
LOC121416262	0.044699	0.0255653	0.194353	0.120035	0.031873	0.00910011	0	0.0121074	0.229005	0.039032	0.21835	0.0355109	semaphorin-1A-like
LOC121415483	0.0388664	0.0285678	0.0430241	0.0546337	0.118908	0	0.22129	0.0390544	0.0115962	0.0376516	0.543141	0.0827554	semaphorin-1A-like
LOC121415590	0.163976	0.414649	0.169504	0.545777	0.189682	0.523425	0.867823	0.0892033	0.272975	0.460962	0.449026	0.503409	semaphorin-2A-like
LOC121411356	0.221333	0.296172	0.553805	0.482979	0.298624	0.0592206	0.421352	0.283504	0.0460681	0.111325	0.212102	0.0821443	semaphorin-5A-like
LOC121416267	0.383145	0.257395	0.263144	0.650354	0.315486	0.438832	0.405478	0.115855	0.0426507	0.0246661	0.0844115	0.0264497	semaphorin-6D-like
LOC121416298	0.468595	0.150553	0.219482	0.797084	0.336963	0.493152	0.326517	0.0694654	0	0.100068	0.558489	0.0570319	semaphorin-6D-like
LOC121415748	0.0419127	0.0259875	0.0601629	0	0.0359484	0.0489005	0.0466168	0	0	0.0190569	0	0	survival_motor_neuron_protein-like
LOC121415864	0.218957	0.150922	0.182677	0.177695	0.293232	0.130974	0.314475	0.182427	0.197783	0.170421	0.333879	0.167801	survival_motor_neuron_protein-like
LOC121428989	0.218103	0.372479	0.300896	0.334338	0.254338	0.309651	0.244321	0.228677	0.427604	0.241987	0.267526	0.187112	survival_of_motor_neuron-related-splicing_factor_30-like
LOC121414415	0.246623	0.13116	0.292738	0.353349	0.233102	0.276185	0.416839	0.200576	0.316275	0.332087	0.300677	0.412444	synapse-associated_protein_1-like
LOC121414452	0.193102	0.111609	0.14168	0.126447	0.136445	0.234559	0.275772	0.134994	0.403292	0.116264	0.142549	0.155747	synapse-associated_protein_1-like
LOC121408610	0.0344252	0.0537221	0.0226227	0.156108	0.0406214	0.252654	0.160993	0.0199586	0.115735	0.0844112	0.148013	0.0256873	synaptic_vesicle_2-related_protein-like
LOC121408904	0.00496701	0.0545304	0.00627751	0.042473	0.00957294	0.016274	0.0914753	0	0	0.00781576	0	0	synaptic_vesicle_2-related_protein-like
LOC121430007	0.0458849	0.0564866	0.0501167	0.0748066	0.028564	0.0733665	0.0244841	0.0165075	0.0136031	0.0153819	0.0378384	0.0479246	synaptic_vesicle_2-related_protein-like
LOC121411790	0.0389483	0.0698986	0.109621	0.125094	0.0541803	0.044015	0.0565035	0.0092934	0.0253247	0.128333	0.162376	0.148449	synaptic_vesicle_glycoprotein_2B-like
LOC121422033	0.0274447	0.0156396	0.012122	0	0.031247	0	0	0	0	0.0341732	0	0	synaptic_vesicle_glycoprotein_2B-like
LOC121420942	0.0755669	0.0622429	0.0904473	0.109648	0.0693978	0.116451	0.200109	0.0121074	0.071721	0.212402	0.0903862	0.184498	synaptic_vesicle_glycoprotein_2B-like
LOC121425151	0.00761497	0	0.0429801	0.0453619	0.00117622	0.0710981	0	0	0	0	1.90878	0	synaptic_vesicular_amine_transporter-like
LOC121425709	0.389256	0.295335	0.45222	0.413793	0.39778	0.474594	0.844791	0.351521	0.528984	0.550923	0.508805	0.0410721	synaptobrevin_homolog_YKT6-like
LOC121413954	0.0130745	0.273094	0	0.0989364	0.0148295	0.540257	0.143065	0.0120998	0.0819827	0	0.175698	0	synaptogenesis_protein_syg-1-like
LOC121420797	0	0	0.00468459	0.0305544	0	0	0	0	0	0	0	0	synaptogenesis_protein_syg-2-like
LOC121419611	0.00296386	0.0012283	0.0134685	0.036169	0	0	0	0.0146006	0	0	0	0.0544917	synaptogenesis_protein_syg-2-like
LOC121422529	0.169654	0.315027	0.238915	0.334191	0.105996	0.70742	0.692698	0.149291	0.139254	0.357166	0.423784	0.660857	synaptogyrin-3-like
LOC121411571	0.113398	0.139475	0.0915174	0.142973	0.13523	0.235432	0.268559	0.0744001	0.384763	0.152657	0.0562797	0	synaptophysin-like
LOC121431749	0.479582	0.607074	1.93199	0.565978	0.439328	0.830644	1.23142	0.284339	0.168808	0.238802	0.344566	0.396494	synaptopodin_2-like_protein
LOC121418685	0.268944	0.319551	0.429242	0.452387	0.275962	0.616587	0.202924	0.247501	0.346868	0.221375	5.92294	0.328839	synaptosomal-associated_protein_25-like
LOC121409236	0.208186	0.196112	0.409188	0.524274	0.138875	0.391541	0.409903	0.0533926	0.430458	0.479447	0.168131	0.366175	synaptosomal-associated_protein_29-like
LOC121426324	0.0793114	0.0722293	0.121992	0.110675	0.108751	0.0653022	0.207924	0.0397304	0.124884	0.0685199	0.149407	0	synaptosomal-associated_protein_47-like
LOC121411791	0.0694506	0.128073	0.150505	0.557461	0.0577876	0.0308706	0.315302	0.0252396	0.159218	0.292772	0.210437	0	extended_synaptotagmin-2-like
LOC121414850	0.00229169	0.00257462	0.0217537	0	0.00726958	0	0	0	0	0	0.658617	0	synaptotagmin-11-like
LOC121432111	0	0	0.00494149	0	0	0.059347	0	0	0	0	0	0	synaptotagmin-12-like
LOC121406212	0.00492757	0	0	0.0454479	0.00982194	0.0216624	0	0	0	0	0.193741	0	synaptotagmin-12-like
LOC121418961	0.110474	0.795655	0.0844422	0.301768	0.0864613	0.265309	0.86657	0.0617151	0.25773	0.186932	0.0281277	0	synaptotagmin-14-like
LOC121431832	0.00624756	0	0.089708	0	0.00296508	0.00932287	0	0	0	0.0123532	0.416511	0	synaptotagmin-15-like
LOC121432000	0.0105807	0.00557993	0.446537	0.115114	0.0188324	0.023049	0	0.055624	0	0.0387043	0.414377	0	synaptotagmin-15-like
LOC121410540	0.0401239	0.0893038	0.0840756	0.0702691	0.0382767	0.139437	0.132593	0.0137251	0.0137051	0.0456582	0.175277	0	synaptotagmin-1-like
LOC121405894	0.554927	0.620474	2.45155	1.00485	0.499395	1.54229	1.25601	0.36872	0.178706	0.334523	17.9379	0.494993	synaptotagmin-1-like
LOC121406164	0.00379482	0.105573	0	0	0	0	0.0559303	0	0.289972	0	0	0	synaptotagmin-2-like
LOC121406117	0.00120341	0.00546255	0.0248139	0	0.0116148	0	0	0	0	0.0145842	1.49888	0	synaptotagmin-5-like
LOC121405860	0.00244271	0	0.0336022	0	0	0.0367195	0	0	0	0	0.0614461	0	synaptotagmin-6-like
LOC121405753	0.00887666	0.0268789	0.0294518	0.0125669	0.00407784	0.0608978	0.0276148	0.0212809	0.0117217	0	0	0.0264497	synaptotagmin-7-like
LOC121413911	0.240587	0.898614	0.347751	1.05632	0.224705	0.444555	1.50442	0.205401	2.47818	0.614452	0.558303	0.0750781	synaptotagmin-like_protein_4
LOC121423051	0.0314429	0.036591	0.0465868	0.143483	0.0271267	0.0826982	0.0530161	0.0130008	0.0416209	0.0151603	0.320438	0	40-kDa_huntingtin-associated_protein-like
LOC121405912	0.0321544	0.0365292	0.204477	0.0442113	0.00759362	0	0.107846	0	0	0.0343421	0	0.0305822	43_kDa_receptor-associated_protein_of_the_synapse-like
LOC121416260	0	0	0	0.0436758	0	0	0	0	0.302738	0.00257832	0.0341065	0.0883608	5-hydroxytryptamine_receptor_1B-like
LOC121416292	0	0	0	0	0	0	0	0	0.343051	0.00502024	0	0	5-hydroxytryptamine_receptor_1D-like
LOC121421635	0	0	0	0.0277556	0	0	0	0	0.487674	0.00820716	0.0442615	0	5-hydroxytryptamine_receptor_1D-like
LOC121425688	0.00680183	0.0971986	0.00690899	0	0.0117538	0.132789	0.158803	0.0116629	0.217431	0.0137294	0	0	5-hydroxytryptamine_receptor_1D-like
LOC121431011	0.00785249	0	0.0133027	0.0381983	0.00909899	0	0	0	0	0	0.323967	0	5-hydroxytryptamine_receptor_1D-like
LOC121431454	0.0082369	0.0445351	0	0.0763965	0	0	0.13295	0.013289	0	0.309322	0.0250964	0.677893	5-hydroxytryptamine_receptor_1E-like
LOC121409037	0.00819611	0.00651678	0.00959029	0.157015	0.0145392	0.0111513	0.0927796	0	0.0132157	0	0	0.132353	5-hydroxytryptamine_receptor_1F-like
LOC121409038	0.00200754	0.0462381	0.0127735	0.0835257	0.0198015	0.0261464	0.01891	0	1.66121	0.0602694	0	0	5-hydroxytryptamine_receptor_1F-like
LOC121425037	0.00317074	0	0	0	0.00436521	0	0	0	0.0476586	0	0	0	5-hydroxytryptamine_receptor_1F-like
LOC121429508	0.00929611	0.0321106	0.0548156	0	0.00489525	0.0061305	0.0179539	0	0	0.0230604	0.0281277	0	5-hydroxytryptamine_receptor_2A-like
LOC121410385	0.0943373	0.115955	0.101645	0.126668	0.117553	0.0690804	0.185316	0.251443	0.0836973	0.491777	0.0378384	0.292642	5-hydroxytryptamine_receptor_2B-like
LOC121409273	0.196086	0.0321915	0.246234	0.412767	0.202329	0.0112946	0.148177	0.1042	1.11814	0.850741	0.542461	0.243099	5-hydroxytryptamine_receptor_4-like
LOC121426731	0	0	0	0.0468586	0	0	0	0	0	0.0219618	0	0	5-hydroxytryptamine_receptor_4-like
LOC121420478	0.0660061	0.0353437	0.099049	0.109339	0.0177728	0.0565575	0.0490585	0.0237207	0	0.15697	0.0378384	0.197442	5-hydroxytryptamine_receptor_6-like
LOC121422218	0.0016946	0	0	0.0185383	0	0.01713	0	0	0.0830945	0	0	0	5-hydroxytryptamine_receptor_7-like
LOC121407015	0.0459208	0.0108137	0.0232472	0.0700095	0.0344025	0.00808757	0.0402971	0	0	0.0257634	0	3.80983	neuronal_acetylcholine_receptor_subunit_alpha-10-like
LOC121413770	0.0148245	0.0551928	0.00912767	0.0230866	0.0142813	0.0033201	0.0351015	0	0.00721969	0	0	0	neuronal_acetylcholine_receptor_subunit_alpha-10-like
LOC121413950	0.00410871	0.00407695	0.0522334	0.142959	0.0120835	0.0285356	0	0.00958291	0	0.00473666	0	0	neuronal_acetylcholine_receptor_subunit_alpha-10-like
LOC121423528	0.035803	0.022826	0.017503	0.212043	0.0305608	0	0	0	0.103582	0	0	0.0528994	neuronal_acetylcholine_receptor_subunit_alpha-10-like
LOC121425640	0.0139314	0	0.00648143	0.10585	0.0110792	0.00426931	0.00727786	0	0	0.00257832	0.134025	0	neuronal_acetylcholine_receptor_subunit_alpha-10-like
LOC121427616	0	0.00995163	0.00173552	0	0.00937469	0	0.109218	0	0	0	0.0413232	0	neuronal_acetylcholine_receptor_subunit_alpha-10-like
LOC121406983	0	0	0.00442498	0.0699268	0	0	0	0	0	0	0.953392	0	neuronal_acetylcholine_receptor_subunit_alpha-2-like
LOC121407460	0.101602	0.00130748	0.0533704	0.253389	0.113825	0.00240191	0.112467	0	0	0.0152576	0	0.0827554	neuronal_acetylcholine_receptor_subunit_alpha-3-like
LOC121408551	0	0.103805	0.0202626	0	0.00159081	0.113679	0.169127	0	0	0.00258315	0	0	neuronal_acetylcholine_receptor_subunit_alpha-3-like
LOC121429806	0.0620041	1.06235	0.0182919	0.0819831	0.0403843	0.269216	0.167807	0.0628571	0.029301	0.0726173	0	0	neuronal_acetylcholine_receptor_subunit_alpha-3-like
LOC121419309	0.00662025	0.0777792	0.00368959	0	0	0.0033201	0.0798952	0.0432908	0.0117217	0.00899389	0.0151928	0.0697773	neuronal_acetylcholine_receptor_subunit_alpha-7-like
LOC121408899	0.00189742	0	0	0.00963971	0	0	0	0	0.0437488	0	0	0	neuronal_acetylcholine_receptor_subunit_alpha-9-like
LOC121415698	0	0	0	0	0	0	0	0	0.187813	0	0	0	neuronal_acetylcholine_receptor_subunit_alpha-9-like
LOC121415820	0.000753794	0.0206302	0.00656686	0	0	0	0	0.0220643	0.618466	0.0119171	0	0	neuronal_acetylcholine_receptor_subunit_alpha-9-like
LOC121412666	0.00609271	0.0325693	0.02378	0	0.013908	0	0.0703635	0	0.0172761	0.00781576	0.0151928	0	neuronal_acetylcholine_receptor_subunit_beta-3-like
LOC121413973	0.0428163	0.013191	0.0379953	0.0204369	0.0164383	0.0382938	0	0	0.0361274	0.028333	0.144357	0.0342988	neuronal_acetylcholine_receptor_subunit_beta-3-like
LOC121415499	0.0188703	0.341563	0.451567	0.165712	0.0202989	0.476095	0.500175	0.0147675	0	0.0594616	0.531516	0	neuronal_acetylcholine_receptor_subunit_beta-4-like
LOC121419139	0.0157479	0.0168105	0.0131719	0.0410428	0.0173783	0.0071028	0.00808157	0.0377506	0.0335511	0	0	0	acetylcholine_receptor_subunit_alpha-like_2
LOC121418676	0.00195861	0	0.0357219	0.0878589	0	0.0313553	0	0	0	0	0.0378384	0.123828	muscarinic_acetylcholine_receptor_M1-like
LOC121425933	0	0.0526427	0.00287223	0	0.00480348	0.0305451	0.0889104	0	0.00756136	0	0	0.121914	muscarinic_acetylcholine_receptor_M2-like
LOC121406537	0.00221593	0	0	0	0	0	0.0592498	0	0.0266665	0.094346	0	6.89372	muscarinic_acetylcholine_receptor_M4-like
LOC121411255	0.0027822	0.00297046	0.00357707	0.0326644	0.0199408	0.336998	0	0	0	0.011662	0	0	acetylcholinesterase-like
LOC121423306	0.0102626	0.00541054	0.00609563	0.0391016	0.0127598	0	0	0.0237207	0	0	0	0	acetylcholinesterase-like
LOC121423057	0.026041	0.129816	0.0346488	0.073274	0.013826	1.38177	0.0287868	0	0.0414924	0.00873645	0	0	acetylcholinesterase-like
LOC121422247	0.00434819	0.0538821	0	0	0.00646541	0	0.004295	0	0.0410671	0	0	0	acetylcholinesterase-like
LOC121423202	0.0174021	0.131562	0	0.0258735	0	0.0103884	0.141858	0	0	0	0	0	acetylcholinesterase-like
LOC121429585	0.0384211	0.581004	0.0792931	0.0251246	0.0169371	0.047297	0.472702	0	0.509432	0	0.641053	0	acetylcholinesterase-like
LOC121422503	0	0	0	0	0	0	0	0	0	0.0782736	0	0.0342988	D(1)_dopamine_receptor-like
LOC121425084	0.0272567	0.100583	0.00863964	0.126389	0.0107738	0.0561181	0.267118	0.0388596	0.00934029	0.0326138	0.169723	0.034006	D(1)_dopamine_receptor-like
LOC121425021	0.00400085	0.456988	0.00763866	0.117047	0.00773448	0.609213	0.37806	0	0.0250019	0.0294703	0	0	D(1)_dopamine_receptor-like
LOC121406602	0.00439294	0	0.0103948	0	0.0130201	0	0	0	0	0.0200177	0.252166	0	D(2)_dopamine_receptor_A-like
LOC121426245	0.0067052	0	0	0	0	0	0.0106997	0	0	0.0419787	0	0	D(2)_dopamine_receptor_B-like
LOC121419135	0.0132299	0.0057691	0.07878	0.0795067	0.00715539	0.0153328	0.0552039	0	0.0547561	0.09866	0	0	D(2)_dopamine_receptor-like
LOC121429212	0.0115699	0.00515144	0.00335672	0	0.00956143	0	0	0	0.0364358	0.162	0	0.0513745	dopamine_beta-hydroxylase-like
LOC121414817	0.0307801	0	0.00815524	0	0.00417142	0	0	0.0325165	0	0	0	0.0410721	dopamine_D2-like_receptor
LOC121425235	0	0.00172689	0.0411014	0.0419351	0	0	0	0	0.148992	0	0	0	dopamine_receptor_1-like
LOC121424975	0	0	0.00530997	0	0	0	0	0	0	0	0.0413232	0	dopamine_receptor_2-like
LOC121427181	0	0.0207487	0	0	0	0	0.0475382	0	0	0	0	0	dopamine_receptor_4-like
LOC121427391	9.0976	7.69513	7.71875	7.73282	7.27299	13.4688	15.7125	7.15772	12.8069	13.4573	39.4161	9.9239	gamma-aminobutyric_acid_receptor-associated_protein
LOC121408331	0.813983	0.700044	0.840368	1.32037	0.611719	1.1595	1.23384	0.3961	1.65769	1.27915	1.5321	1.47695	gamma-aminobutyric_acid_receptor-associated_protein-like_2
LOC121428858	0.095553	0.0657342	0.354385	0.453882	0.0697619	0.0484217	0.0833739	0	0	0.0911634	0.159673	0.25944	gamma-aminobutyric_acid_type_B_receptor_subunit_1-like
LOC121416730	0.0954998	0.102367	0.20069	0.39151	0.0298289	0.210204	0.192347	0.0125031	0	0.0458274	0.250658	0	gamma-aminobutyric_acid_type_B_receptor_subunit_2-like
LOC121415635	0.0404193	1.43431	0.0237211	0.0479431	0.0451741	0.926612	0.498543	0.0373888	0.0337767	0.00970194	0.144281	0	glutamate_receptor_1-like
LOC121415638	0.0111643	0.778114	0.0242229	0.0187414	0.0205502	0.268302	0.624218	0	0.0241551	0	0	0	glutamate_receptor_1-like
LOC121415639	0.274555	3.29395	0.218384	0.308227	0.172905	2.2294	1.80012	0.0872733	0.204981	0.0858839	1.13453	0	glutamate_receptor_1-like
LOC121415634	0.393339	2.96902	0.275629	0.627294	0.343548	2.67129	3.88234	0.180377	0.068091	0.0848595	0.724542	0.113326	glutamate_receptor_3-like
LOC121406839	0	0.0109251	0	0.0284608	0.00443865	0	0	0	0	0	3.95333	0	glutamate_receptor_ionotropic,_kainate_2-like
LOC121413896	0.00222164	0	0.00357628	0.0391899	0	0	0	0	0	0	0	0	glutamate_receptor_ionotropic,_kainate_2-like
LOC121413234	0	0.0090681	0	0	0	0	0	0.00594231	0	0	0.0378384	0	metabotropic_glutamate_receptor_1-like
LOC121413962	0	0.007388	0.0389225	0.0378233	0.0170679	0	0.0922616	0	0	0.121923	0	0	metabotropic_glutamate_receptor_2-like
LOC121410981	0.00367817	0	0.0802572	0.0366268	0	0	0	0	0	0	0.237782	0	metabotropic_glutamate_receptor_3-like
LOC121413160	0.00138864	0.00714941	0.00611064	0.0324507	0	0.00740883	0	0	0	0	0	0	metabotropic_glutamate_receptor_3-like
LOC121429617	0.00645803	0.0449424	0.0219443	0.0350022	0.0236345	0.0422659	0.0787595	0	0.00868551	0	0.288954	0	metabotropic_glutamate_receptor_3-like
LOC121410982	0.00156051	0.00683469	0	0.0272973	0	0	0	0	0	0	0	0	metabotropic_glutamate_receptor_7-like
LOC121427297	0.00199855	0	0	0.0722951	0.00502182	0.00377203	0	0	0	0	0.0288478	0	metabotropic_glutamate_receptor_8-like
LOC121427704	0.0047972	0	0.0402805	0.0377006	0	0	0	0	0	0	0.324517	0	metabotropic_glutamate_receptor_8-like
Total Expression	26.956	55.753	44.2989	49.7985	23.3712	55.2332	72.4679	19.4575	39.3246	33.8516	137.033	40.1551
Endodermal Markers
LOC121406173	0	0	0	0.0313845	0.00242574	0.0209754	0	0	0	0.00960888	0	0	Endo16 (uncharacterized_LOC121406173)
LOC121428657	0.00364957	0.00541054	0	0	0.00792621	0	0.038216	0	0.0271493	0.00599708	0	0	hepatocyte_nuclear_factor_4-alpha-like (FOXA1)
LOC121419318	0.0330645	0.686404	0.114551	0.0644812	0.0177324	2.79754	0.197993	0.127166	0.068399	0.0224244	0.436266	0	hepatocyte_nuclear_factor_3-beta-like (FOXA2)
Total Expression	0.036714	0.691815	0.114551	0.0958657	0.0280843	2.81851	0.236209	0.127166	0.0955483	0.0380304	0.436266	0
Stem Cell Markers
LOC121408828	0.00220611	0.00111191	0.0228828	0.103099	0.00480348	0	0.0351095	0.0292354	0	0	0	0	protein_nanos-like
LOC121408762	1.7272	1.0143	1.1291	1.64069	2.11897	1.30966	1.13566	1.35213	0.314976	0.696365	0.4173	1.02892	piwi-like_protein_1
LOC121431753	0.0952657	0.0604263	0.0786122	0.0783457	0.118736	0.156191	0.311534	0.0311242	0.0736487	0.391766	0.222077	0	piwi-like_protein_1
LOC121424246	0.203923	0.0661122	0.111782	0.270113	0.38607	0.110845	0.271183	0.380627	0.132403	0.223864	0.0341065	0.0342988	probable_ATP-dependent_RNA_helicase_DDX4
Total Expression	2.02859	1.14195	1.34238	2.09224	2.62858	1.57669	1.75349	1.79312	0.521028	1.31199	0.673483	1.06322
Cell Cycle and Cell Proliferation
LOC447797	0.0325998	0.0527866	0.044578	0.10498	0.275986	0.0237775	0.151316	0.112608	0.0155283	0.00257832	0	0	cyclin_B
LOC121429842	0.0632756	0.0459339	0.0900284	0.138183	0.0343621	0.0883743	0.0832086	0.0475817	0	0.0064801	0	0.034006	cyclin-C-like
LOC121407077	0.0419242	0.0307507	0.05334	0.0408174	0.0406922	0.0295727	0.156052	0.0632273	0.0255035	0.0212756	0.0281318	0.0355109	cyclin-D1-binding_protein_1_homolog
LOC121407841	0.0219621	0.00818457	0.0096865	0.0247736	0.0140567	0	0.00602689	0	0	0.00599708	0	0	cyclin-dependent_kinase_10-like
LOC121427260	0.982892	0.753032	0.923895	1.26757	1.40013	0.635023	0.639209	1.08521	0.905867	1.23833	0.772479	0.997416	cyclin-dependent_kinase_11B-like
LOC121426721	0.0931146	0.0187871	0.0299775	0.138843	0.0799247	0.056719	0.0582755	0.0375821	0.114943	0.0888698	0.0288478	0.144482	cyclin-dependent_kinase_12-like
LOC121426631	0.33156	0.18975	0.337149	0.368602	0.301378	0.103133	0.380289	0.148775	0.121743	0.2629	0.115008	0.273582	cyclin-dependent_kinase_12-like
LOC121423334	0.108751	0.0548055	0.344305	0.571513	0.0894038	0.156467	0.164705	0.0575638	0.622171	1.27538	0.401914	1.9468	cyclin-dependent_kinase_14-like
LOC121410011	0.240369	0.231516	0.341633	0.504929	0.225238	0.347198	0.409018	0.127105	0.218505	0.151326	0.428426	0.0570319	cyclin-dependent_kinase_17-like
LOC121431660	0.0908937	0.202761	0.0400494	0.274021	0.947949	0.0623847	0.44555	0.452046	0.0888935	0.189064	0	0.137517	cyclin-dependent_kinase_1-like
LOC121411322	0.01924	0.022254	0.0223172	0.0128363	0.0275769	0.0336571	0.0379828	0	0.0278872	0.00435231	0.150022	0	cyclin-dependent_kinase_20-like
LOC121417954	0.0282173	0.0207463	0.04385	0.0666064	0.0248686	0.0579994	0	0	0.0389864	0.085345	0	0.049017	cyclin-dependent_kinase_2-interacting_protein-like
LOC121410761	0.0430599	0.0819282	0.0232129	0.179072	0.111345	0.0138973	0.0537158	0.0285798	0.0410938	0.0185329	0	0	cyclin-dependent_kinase_2-like
LOC447791	0.0530129	0.00848052	0.146842	0.042857	0.0382056	0.0192816	0	0.0310207	0	0.070651	0	0.0264497	cyclin-dependent_kinase_4
LOC121423575	0.118442	0.242614	0.0951285	0.716085	0.104791	0.387892	1.46447	0.0954211	0.351663	1.63939	0.0707483	0.375844	cyclin-dependent_kinase_4_inhibitor_C-like
LOC121426230	0.0799501	0.0221614	0.879747	0.879892	0.0550502	0.136939	0.131064	0.105324	1.52292	2.26168	3.61373	0.976766	cyclin-dependent_kinase_5_activator_1-like
LOC121415104	0.0695176	0.0616594	0.183253	0.0954778	0.0757735	0.140378	0.217694	0.105824	0.0287506	0.0391717	0	0.153537	cyclin-dependent_kinase_7-like
LOC121414188	0.0761321	0.0349603	0.0727674	0.2127	0.0995799	0.0464892	0.0458493	0.0337626	0.0277173	0.0505632	0	0.0256873	cyclin-dependent_kinase_8-like
LOC121414213	0.0283902	0.0379035	0.0152559	0.0543475	0.031372	0.0176819	0	0.0137543	0	0.0227432	0.0854372	0	cyclin-dependent_kinase_8-like
LOC121428575	0.104663	0.0753982	0.0866253	0.0708588	0.139224	0.0511672	0.0419165	0.0364959	0.189762	0.112786	0.0413232	0.303102	cyclin-dependent_kinase_9-like
LOC121419122	0.293749	0.599509	0.404619	0.441586	0.263645	0.878968	1.1903	0.363785	0.108231	0.147561	0.319008	0.0607486	cyclin-dependent_kinase-like_1
LOC121431955	0.237214	0.570169	0.496124	0.623767	0.252197	1.03958	0.443168	0.23397	0.0994649	0.226477	0.171277	0.0932557	cyclin-dependent_kinase-like_4
LOC121411466	0.0229365	0.0888654	0.0657228	0.189754	0.059057	0.0887674	0.204247	0.0213857	0	0	0	0	cyclin-dependent_kinase-like_5
LOC121420139	0.0101885	0.0261368	0.0384954	0.060444	0.0255294	0.0173083	0	0	0	0.0128419	0.201649	0.0410721	cyclin-dependent_kinases_regulatory_subunit-like
LOC121426126	0.26055	0.271189	0.221217	0.236231	0.357765	0.219559	0.297549	0.265476	0.429061	0.331832	0.431126	0.034006	cyclin-dependent-like_kinase_5
LOC121422417	0.045759	0.103815	0.0265141	0.154377	0.355776	0.00593437	0.113666	0.148946	0.0360788	0.0610315	0.247651	0.0900025	cyclin-F-like
LOC121412378	0.292139	0.177406	0.263279	0.409115	0.596218	0.150319	0.438918	0.439714	0.106384	0.159384	0.0945514	0.0544917	cyclin-G2-like
LOC121423665	0.0691625	0.0916201	0.0902252	0.191663	0.0808187	0.118098	0.0894023	0.0609309	0.165252	0.102796	0	0.181394	cyclin-G-associated_kinase-like
LOC121411123	0.0846786	0.0824482	0.111632	0.0507064	0.0938952	0.0577609	0.0749981	0.145307	0.103004	0.0707886	0.266225	0.271239	cyclin-H-like
LOC121411174	0.0259165	0.0155784	0.0107676	0.0584558	0.0161123	0.0320198	0	0	0.219719	0.075581	0	0	cyclin-H-like
LOC121412352	1.02409	1.9588	1.07065	0.473976	0.859071	1.31825	2.31135	0.598517	2.36768	1.24312	1.52067	1.33615	cyclin-I-like
LOC121425323	0.0371484	0.0317306	0.0795585	0.105398	0.0171848	0.0157362	0.0550536	0	0	0.0101518	0	0	cyclin-J-like
LOC121418540	0.0428441	0.0421923	0.128926	0.111413	0.0482435	0.0287302	0.0366566	0	0.0726819	0.0990249	0.0417455	0.0827554	cyclin-K-like
LOC121427906	0.954891	0.528859	1.14512	1.66494	1.07791	1.14597	1.32108	0.530576	1.19546	1.32966	0.798457	0.741399	cyclin-L1-like
LOC121410950	0.0808153	0.0746878	0.174447	0.0356516	0.131287	0.0939884	0.0153129	0.108472	0.0423949	0.0294828	0.0426165	0.0596932	cyclin-Q-like
LOC121410316	1.18539	0.981267	1.02676	1.4785	1.46508	0.921324	1.17595	0.758835	0.87584	1.44174	1.16825	1.27104	cyclin-T2-like
LOC121418372	0.0406148	0.0099881	0.0215927	0	0.0651391	0.0338647	0.0390963	0.0137251	0.0189499	0.00509113	0.377496	0.17125	cyclin-Y-like_protein_1
LOC121419845	0.0175948	0.0321444	0.0168362	0.00872198	0.0172516	0.0645232	0	0	0.00756136	0	0.203988	0	cyclin-Y-like_protein_1
LOC121405827	1.8045	1.27057	0.589997	2.03544	1.86293	1.24366	1.21508	0.985765	7.65407	1.29614	0.426444	2.19975	G1/S-specific_cyclin-D1-like
LOC121408084	0.0390538	0.166293	0.0465354	0.225059	0.176766	0.0272241	0.241007	0.13691	0.0137051	0.081342	0	0.080024	G1/S-specific_cyclin-E
LOC121419378	0.0199431	0	0.00781857	0.0227537	0.0348771	0.0164557	0.039445	0	0	0.0194996	0	0	G2/mitotic-specific_cyclin_S13-7-like
LOC121409442	0.0551082	0.145365	0.01444	0.142267	0.600234	0.0271421	0.138813	0.121026	0.0683439	0.0349531	0.0281318	0.034006	G2/mitotic-specific_cyclin-A-like
LOC121410426	0.00629759	0.0829163	0.00149301	0.105961	0.127621	0.00240191	0.210434	0.0691002	0.0155283	0.0222532	0	0.0342988	G2/mitotic-specific_cyclin-A-like
LOC121429467	0.0463273	0.3136	0.0435373	0.180933	1.17937	0.101328	0.372274	0.382994	0.207766	0.258499	0.0562635	0.501733	G2/mitotic-specific_cyclin-B3-like
LOC121416277	0.117851	0.148709	0.0332326	0.167941	0.530054	0.0209356	0.125492	0.190455	0.0522848	0.0224034	0.193945	0.118807	G2/mitotic-specific_cyclin-B-like
LOC121410158	0.0326909	0.0678836	0.0501679	0.221018	0.135624	0.0142539	0.0587237	0.0678239	0.0234481	0.0181376	0.0336731	0	G2_and_S_phase-expressed_protein_1-like
LOC121429452	0.0764761	0.345786	0.212483	0.411306	0.722876	0.0725424	0.238287	0.297107	0.33823	0.286136	0	0.157435	DNA_polymerase_alpha_catalytic_subunit-like
LOC121418141	0.0275579	0.0906588	0.0341674	0.0303634	0.288508	0.0486049	0.124996	0.159277	0.0279821	0.0807622	0.0281318	0.0697773	DNA_polymerase_alpha_subunit_B-like
LOC121431843	0.0785112	0.064526	0.0616373	0.0804905	0.0812724	0.0440796	0.140426	0.0397671	0.0177264	0.068589	0.0517767	0.0750781	DNA_polymerase_beta-like
LOC121421151	0.0338251	0.148408	0.0282792	0.121006	0.122671	0.0487549	0.167421	0.0266427	0.126792	0.112289	0	0.112101	DNA_polymerase_delta_catalytic_subunit-like
LOC121422360	0.0792274	0.100764	0.0993273	0.113495	0.156055	0.0892418	0.147889	0.137095	0.0325351	0.0519267	0.0378384	0.105903	DNA_polymerase_delta_subunit_2-like
LOC121429881	0.853206	0.664003	0.618635	0.531919	1.37631	0.379978	0.45654	1.00137	0.776729	0.417125	0.403152	0.449837	DNA_polymerase_delta_subunit_3-like
LOC121408448	0.940969	0.62337	0.458095	0.740186	0.47005	1.06447	0.785173	1.14041	0.214008	0.458931	0.651751	0.034006	DNA_polymerase_delta_subunit_4-like
LOC121408512	0.167472	0.151737	0.0733136	0.0453301	0.12459	0.0996222	0.112466	0.337247	0	0.0468094	0.110228	0.0256873	DNA_polymerase_delta_subunit_4-like
LOC121419874	0.0162141	0.0338415	0.0104258	0.234923	0.134955	0.00586372	0	0.0982654	0.109315	0.0754988	0.193945	0.147096	DNA_polymerase_epsilon_catalytic_subunit_A-like
LOC121418907	0.0283178	0.0478087	0.00965652	0.023815	0.104462	0.0210181	0.0529101	0.0632051	0	0.0609247	0.0281277	0	DNA_polymerase_epsilon_subunit_2-like
LOC121428701	0.345035	0.452649	0.266027	0.404266	0.981337	0.162798	0.300061	0.580806	0.328114	0.432338	0.295838	0.386169	DNA_polymerase_epsilon_subunit_3-like
LOC121423997	0.114962	0.075586	0.0495116	0.102849	0.282783	0.0544055	0.0303906	0.197181	0.00944895	0.121987	0	0	DNA_polymerase_epsilon_subunit_4-like
LOC121418400	0.0059853	0.00989302	0.00898482	0.0914581	0.0692038	0.01617	0.0659726	0	0.0534869	0.0267998	0	0	DNA_polymerase_eta-like
LOC121415721	0.0174372	0.0138489	0.0095744	0.124984	0.00314249	0	0.0174961	0.0693789	0	0	0	0	DNA_polymerase_iota-like
LOC121415844	0.0105785	0.0168301	0.021784	0.0154115	0.00795105	0.0572074	0.0530161	0	0.0230688	0.00386652	0.16422	0	DNA_polymerase_iota-like
LOC121415332	0.0210308	0.0791793	0.0600481	0.0546543	0.0698976	0.0467121	0.158041	0	0.0132217	0.0794465	0.0250964	0	DNA_polymerase_kappa-like
LOC121413377	0.0160179	0.0179735	0.0303463	0.119309	0.0528052	0.0131821	0	0	0	0.0119171	0	0.0256873	DNA_polymerase_theta-like
LOC121431754	0.21669	1.06236	0.218581	1.08518	2.13326	0.354415	0.719813	0.794583	0.485063	0.65737	0.333612	0.758241	proliferating_cell_nuclear_antigen-like
LOC121417436	4.84669	2.74879	3.97185	3.80195	8.49826	2.98902	3.75585	7.59019	2.56476	4.1566	4.75264	3.10468	proliferation-associated_protein_2G4-like
LOC121430677	1.09343	0.317688	1.51314	1.33918	1.12755	1.65784	0.38113	0.981832	0.423241	0.463417	2.40387	0.598126	myc_protein-like
LOC121429790	0.0470388	0.0679513	0.0593626	0.132196	0.0501702	0.013413	0.11581	0.0092934	0.0616646	0.0302199	0	0	telomerase_reverse_transcriptase-like (TERT)
Total Expression	18.5121	17.2118	17.7786	24.7653	31.4047	17.3315	22.518	21.7492	23.8302	22.2902	21.8395	19.0437
Cilia Markers
LOC121408954	1.39727	1.06825	1.09555	0.840696	0.684894	2.1747	1.13008	0.430483	0.0283468	0.278435	0.623525	0.430932	tektin-1-like
LOC121423323	0.00707169	0.182062	0.00625156	0.0181128	0.00265108	0.367373	0.0635175	0	0	0.00717475	0	0	tektin-3-like
LOC121423108	0.00726732	0.138892	0.0533574	0.0740564	0.0115817	0.432387	0.150242	0	0	0.0538231	0	0	tektin-4-like
LOC121430708	0.0750891	1.41934	0.054249	0.126189	0.0834481	2.13712	0.800916	0.185965	0.0343795	0.389454	0.454587	0	tektin-B1-like
LOC121410831	0.0749097	0.498456	0.0498339	0.133093	0.0991309	0.520131	0.149455	0.0614117	0.0519361	0.0918832	0.0151928	0.261987	cilia-_and_flagella-associated_protein_100-like
LOC121428704	0.0471255	0.487241	0.052715	0.0845284	0.0668267	0.463318	0.372257	0.0201968	0.0692649	0.052404	0.106866	0.103824	cilia-_and_flagella-associated_protein_157-like
LOC121407266	0.00438358	0.0581933	0.0427498	0.010129	0.0268668	0.0733078	0.0402971	0	0.0273269	0	0	0	cilia-_and_flagella-associated_protein_20
LOC121407328	0.0266465	0.0273065	0.0122224	0.0889201	0.0253566	0.0978078	0.004295	0.0442848	0	0.0359604	0.0288478	0	cilia-_and_flagella-associated_protein_20
LOC121425120	0.00814609	0.0484942	0.00766635	0.0359072	0.0113424	0.0797571	0.0571522	0.0100553	0	0	0.117836	0.0410721	cilia-_and_flagella-associated_protein_206-like
LOC121407265	0.00714701	0.0587675	0.0166708	0	0	0.135513	0.0323807	0.0340595	0	0	0	0.0288044	cilia-_and_flagella-associated_protein_20-like
LOC121426156	0.0990852	0.11483	0.413841	0.334645	0.104624	0.0960481	0.0899507	0.123876	0.00868551	0.0419903	0	0.143541	cilia-_and_flagella-associated_protein_221-like
LOC121409153	0.0515852	0.507205	0.077654	0.159175	0.0285159	0.748891	0.489639	0.109133	0.0910585	0.00257832	0.118547	0	cilia-_and_flagella-associated_protein_251-like
LOC121411688	0.00179327	0.000929186	0.0117762	0	0	0	0	0	0	0.178613	0	0	cilia-_and_flagella-associated_protein_251-like
LOC121426620	0.0126222	0.0179298	0.00554358	0.169516	0.0735661	0	0.0290874	0.0418647	0	0.00615395	0.294086	0	cilia-_and_flagella-associated_protein_251-like
LOC121413236	0.0302487	0.0448524	0.0128523	0.0154115	0.0482346	0.108392	0	0	0.0278209	0.0137103	0	0	cilia-_and_flagella-associated_protein_298-like
LOC121413297	0.011211	0.0132352	0.0164927	0	0	0.0286668	0.0115752	0	0	0.00615395	0	0	cilia-_and_flagella-associated_protein_298-like
LOC121431907	0.0125906	0.0638721	0.00656452	0	0.00707187	0.112644	0	0.0150699	0	0.0137294	0.0562797	0	cilia-_and_flagella-associated_protein_299-like
LOC121429496	0.0856522	0.0286735	0.143489	0.175311	0.0700671	0.00313127	0	0	0.0508833	0.034605	0.0517767	0.0264497	cilia-_and_flagella-associated_protein_300-like
LOC121418368	0.410394	0.631304	0.347528	0.239563	0.248226	0.751146	0.483983	0.460732	0.219155	0.0968312	1.01974	0	cilia-_and_flagella-associated_protein_36-like
LOC121410594	0.175009	0.305937	0.251938	0.136774	0.198196	0.280546	0.377939	0.19484	0.0847839	0.0858512	0.268214	0	cilia-_and_flagella-associated_protein_410-like
LOC121424756	0.0221041	0.0747657	0.0195337	0.183331	0.0190586	0.0224581	0.165494	0	0	0.0107386	0.0378384	0	cilia-_and_flagella-associated_protein_43-like
LOC121420304	0.197532	1.17895	0.13796	0.332984	0.10584	1.65895	0.607938	0.148163	0.0496361	0.169108	0.232921	0.125347	cilia-_and_flagella-associated_protein_45-like
LOC121424906	0.0292341	0.0583492	0.0253643	0.114638	0.0274639	0.119446	0.0522045	0.0426556	0.0227902	0.109448	0	0	cilia-_and_flagella-associated_protein_46-like
LOC121413871	0.00806879	0.0159653	0.00807259	0.0549332	0.0464785	0.0271119	0	0	0	0	0	0	cilia-_and_flagella-associated_protein_47-like
LOC121422444	0.0535148	0.447305	0.0991627	0.0885036	0.0668415	0.456306	0.110179	0.096953	0.140233	0.00375003	0.213671	0	cilia-_and_flagella-associated_protein_52-like
LOC121416078	0.0223664	0.0483988	0	0	0.0111448	0.100397	0.0104898	0.0171858	0	0.0137294	0.0562797	0	cilia-_and_flagella-associated_protein_53-like
LOC121416185	0.0776334	0.389121	0.0667884	0.108958	0.0370826	0.473418	0.528473	0.0714889	0.0282631	0.088157	0	0	cilia-_and_flagella-associated_protein_53-like
LOC121411757	0.0141696	0.0195902	0.00530997	0.0592511	0.0145676	0.0311886	0.138462	0.0430678	0.026388	0.0175061	0	0	cilia-_and_flagella-associated_protein_54-like
LOC121423609	0.0182871	0.172362	0.0559527	0.0991668	0.0169097	0.141812	0.111208	0.0429974	0	0.0526636	0	0	cilia-_and_flagella-associated_protein_57-like
LOC121424796	0.0453276	0.231885	0.0850069	0.0799563	0.104091	0.24192	0.108478	0.0841597	0.0175825	0.0145842	0	0.230415	cilia-_and_flagella-associated_protein_58-like
LOC121418301	0.0114447	0.0488956	0	0.061745	0	0.0673721	0.020095	0.0389937	0	0	0.0675899	0	cilia-_and_flagella-associated_protein_61-like
LOC121425818	0.0241304	0.160746	0.119496	0.0780443	0.0227759	0.183355	0.158693	0.0445981	0.0404143	0.0419108	0.107205	0	cilia-_and_flagella-associated_protein_65-like
LOC121426561	0.0511688	0.317957	0.0241954	0.173754	0.0443465	0.461395	0.33351	0.055479	0.0385749	0.0336733	0.0562797	0	cilia-_and_flagella-associated_protein_69-like
LOC121419134	0.0987055	0.417131	0.0584692	0.350541	0.0833869	0.611211	0.266785	0.0602652	0.0617141	0.0719946	0	0	cilia-_and_flagella-associated_protein_70-like
LOC121428207	0.0787686	0.194538	0.107121	0.160394	0.0461081	0.230556	0.342431	0.0140298	0.0974215	0.0144679	0.0562797	0.105903	cilia-_and_flagella-associated_protein_74-like
LOC121429102	0.0288859	0.939465	0.0599535	0.0481599	0.0102056	0.979384	0.407214	0.0546718	0	0.0445857	0	0.0626735	cilia-_and_flagella-associated_protein_77-like
LOC121420140	0.0501298	0.10667	0.0646528	0.134405	0.0439196	0.255608	0.0173167	0.0183811	0.0364132	0.0247107	0.060743	0	cilia-_and_flagella-associated_protein_91-like
LOC121410045	0.0136851	0.0973696	0.0290982	0.083141	0.0678462	0.0940776	0.0431566	0	0.0117217	0.0194745	0.0378384	0	cilia-_and_flagella-associated_protein_97-like
LOC121424926	0.141931	0.285393	0.11641	0.176953	0.171993	0.402854	0.292503	0.128296	0.0670886	0.102453	0.174087	0	cilia-_and_flagella-associated_protein_99-like
LOC121420415	0.0354964	0.122888	0.0265751	0.0684131	0.0340268	0.24127	0.14137	0.0178014	0.0220761	0.0146426	0.0455573	0.049017	cilia-_and_flagella-associated_protein_HOATZ-like
LOC121424851	0.0275256	0.0998392	0.0287722	0.131499	0.0268233	0.23392	0.146022	0	0	0.00598149	0.0562797	0	ciliary-associated_calcium-binding_coiled-coil_protein_1-like
LOC121424379	0.0764174	0.0530454	0.182472	0.287358	0.0581439	0.173813	0.504002	0.0744886	0.125798	0.0489446	0.181931	0.0621064	ciliogenesis_and_planar_polarity_effector_1-like
LOC121407951	0.0298823	0.0278681	0.0439965	0.141523	0.0514982	0.00792905	0.0828529	0.0763881	0.0542325	0.0200629	0.254622	0.0264497	ciliogenesis_and_planar_polarity_effector_2-like
LOC121426192	0.123309	0.150191	0.144852	0.327229	0.108878	0.287691	0.143713	0.100181	0.102308	0.0710188	0.328071	0	ciliogenesis-associated_TTC17-interacting_protein-like
LOC121418980	0.0265417	0.213725	0.0645762	0.0246957	0.0190785	0.285068	0.0700696	0.00841504	0.0368891	0.0469089	0.0878329	0	33_kDa_inner_dynein_arm_light_chain,_axonemal
LOC121420563	0.0682889	0.3939	0.0574342	0.0574746	0.079374	0.359753	0.184274	0.0398216	0.0491012	0	0.0941181	0	33_kDa_inner_dynein_arm_light_chain,_axonemal
LOC121417453	0.00755414	0.0689502	0	0.0427088	0.00869478	0.0407652	0.0466991	0	0	0.00525214	0	0	dynein_assembly_factor_1,_axonemal-like
LOC121417498	0.00740856	0.117326	0	0	0.0139377	0.150492	0.163362	0	0.0260953	0	0	0	dynein_assembly_factor_1,_axonemal-like
LOC121413277	0.00486695	0.022193	0.0257813	0	0.0210786	0.00843809	0.004295	0.0275804	0	0	0	0	dynein_assembly_factor_3,_axonemal-like
LOC121415243	0.0964499	0.101968	0.126779	0.177216	0.133453	0.252068	0.19897	0.133945	0.0827496	0.0862565	0.430282	0.114323	dynein_assembly_factor_4,_axonemal-like
LOC121408229	0.00524562	0.0327051	0.0308797	0.0398648	0.00879157	0.0367694	0	0.06296	0	0	0.0393811	0	dynein_assembly_factor_6,_axonemal-like
LOC121419901	0.011617	0.0350794	0.012715	0.0220179	0.0288207	0.0674927	0.117904	0	0.0653729	0	0.0562797	0	dynein_axonemal-associated_protein_1-like
LOC121422823	0.0346124	0.429896	0.0498629	0.213963	0.0379127	0.540966	0.486403	0.0883955	0	0.0218744	0.196494	0	dynein_beta_chain,_ciliary
LOC121420510	0.0365417	0.08698	0.0583418	0.0705192	0.0365016	0.0899501	0.200079	0.0442799	0	0.0135349	0.137656	0	dynein_beta_chain,_flagellar_outer_arm-like
LOC121419755	0.00159711	0.0106794	0	0.0318845	0.0050785	0.0692769	0.0659726	0	0	0	0	0.147096	dynein_beta_chain,_flagellar_outer_arm-like
LOC121422261	0.0158601	0.174864	0.0112907	0.168217	0.0183352	0.234116	0.233786	0.054336	0.00721969	0.0390674	0	0.0626735	dynein_heavy_chain_1,_axonemal-like
LOC121408397	0.0126255	0.110053	0.0404662	0.0616078	0.0293832	0.203124	0.191288	0.052588	0	0	0	0	dynein_heavy_chain_10,_axonemal-like
LOC121408461	0.0336783	0.341437	0.0507596	0.243551	0.0574451	0.329536	0.748109	0.0139725	0.00756136	0.0212959	0.0378384	0.17343	dynein_heavy_chain_10,_axonemal-like
LOC121410131	0.0178759	0.089096	0.0061626	0.0176434	0.0163064	0.0648323	0.236937	0	0.0890633	0.0151068	0	0	dynein_heavy_chain_12,_axonemal-like
LOC121410141	0.0301062	0.0392842	0.0446023	0.0916996	0.0520973	0.0486506	0.00908171	0	0	0.0218038	0.0250964	0	dynein_heavy_chain_12,_axonemal-like
LOC121429563	0.0493997	0.177684	0.0235551	0.186275	0.0520134	0.239677	0.159413	0.0092934	0.0364358	0	0	0.049017	dynein_heavy_chain_2,_axonemal-like
LOC121410272	0.101341	0.181923	0.0162731	0.299452	0.075857	0.307733	0.292623	0.0382653	0	0.0697033	0.0970413	0.052137	dynein_heavy_chain_3,_axonemal-like
LOC121422358	0.0342226	0.35633	0.0622747	0.196242	0.0258958	0.349787	0.234469	0.0121074	0.0230688	0	0.229582	0.0305822	dynein_heavy_chain_3,_axonemal-like
LOC121408153	0.119712	0.461299	0.184935	0.565577	0.116281	0.585526	0.559219	0.037526	0.0381789	0.0863527	0.264149	0.0410721	dynein_heavy_chain_5,_axonemal-like
LOC121413891	0.0170131	0.0695294	0.053465	0.0523485	0.0202199	0.120122	0.0271891	0.0433717	0	0	0	0	dynein_heavy_chain_5,_axonemal-like
LOC121413974	0.0286599	0.151525	0.0809829	0.145791	0.00966206	0.240062	0.209213	0	0.00721969	0.0524446	0	0	dynein_heavy_chain_5,_axonemal-like
LOC121409928	0.0106018	0.0338375	0	0	0.0106456	0.014956	0.217631	0	0	0	0	0	dynein_heavy_chain_6,_axonemal-like
LOC121409978	0.0310687	0.169949	0.0342063	0.0275893	0.0409491	0.174309	0.0323807	0.102755	0.0192831	0.0497292	0	0	dynein_heavy_chain_6,_axonemal-like
LOC121419079	0.0514885	0.171171	0.0176374	0.135282	0.0280985	0.175575	0.201215	0.0374369	0	0.00372932	0.0151928	0.0512195	dynein_heavy_chain_6,_axonemal-like
LOC121423875	0.133248	0.91128	0.172678	0.590266	0.0999901	1.11545	1.26174	0.0874838	0.0439762	0.0259532	0.498704	0.0342988	dynein_heavy_chain_7,_axonemal-like
LOC121413912	0.0790778	0.190606	0.0615387	0.290884	0.0952321	0.199465	0.353364	0.0280056	0.0548796	0.0547241	0	0.0626735	dynein_heavy_chain_8,_axonemal-like
LOC121415364	0.0014382	0	0	0	0.00382268	0	0.0325	0.0375821	0	0.0494752	0	0.105903	dynein_heavy_chain_8,_axonemal-like
LOC121415092	0.0353108	0.234057	0.00834921	0.137808	0.016411	0.241448	0.230706	0.00673457	0	0.00435231	0	0.0626735	dynein_intermediate_chain_2,_ciliary
LOC121423597	0.0294541	0.0565814	0.0321826	0.203768	0.0754892	0.0610279	0.245547	0.0133134	0.00756136	0.012184	0.171397	0.303647	dynein_intermediate_chain_3,_axonemal-like
LOC121422702	0.043587	0.407027	0.103065	0.0514493	0.0592946	0.565937	0.160834	0.0134691	0.0317824	0.0401161	0.336556	0	dynein_intermediate_chain_3,_ciliary-like
LOC121422099	0.152937	0.405121	0.168282	0.273952	0.240337	0.405217	0.549435	0.0763862	0.162439	0.620711	0.343211	0	dynein_intermediate_chain_CFAP94,_axonemal-like
LOC121418439	0.060132	0.490148	0.054634	0.0854648	0.045408	0.531436	0.240657	0.0792696	0	0.0525934	0	0	dynein_light_chain_1,_axonemal-like
LOC121422197	0.0304351	0.0930791	0.0130888	0.0457004	0.0347132	0.136792	0.362517	0.0286684	0	0.0302146	0.154265	0.0889878	dynein_light_chain_4,_axonemal-like
LOC121408814	6.38177	3.90104	4.20242	3.77018	8.23832	2.35842	2.19493	8.19541	2.11525	8.83494	5.62235	2.12019	dynein_light_chain_LC6,_flagellar_outer_arm-like
Total Expression	11.6267	22.1048	10.0574	14.308	12.865	26.7186	19.5382	12.3356	4.54043	12.6413	13.9601	5.19845
Miscellaneous Growth Factors (and other genes) of Interest
LOC121405581	1.09461	0.502513	1.05173	1.75568	1.01395	0.418213	0.617169	0.476861	0.136909	0.861869	0.165122	0.11823	bone_morphogenetic_protein_1_homolog
LOC121431799	0	0.00472182	0	0	0	0	0	0	0	0	0	0.449461	bone_morphogenetic_protein_1-like
LOC121432040	0.0714948	0.516283	0.00142069	0.0360938	0.0298848	0.0527595	0.961145	0.0780288	0	0.0291584	0	0	bone_morphogenetic_protein_2-like
LOC121432277	0.021575	0.0112506	0.0079841	0.0754386	0.0299012	0	0	0.013289	0.00721969	0	0	0	bone_morphogenetic_protein_3-like
LOC446159	0.144437	0.103005	0.0584055	0.0958664	0.0868732	0.00796292	0.18524	0.0326056	0.0117217	0.0064801	0	0	bone_morphogenetic_protein_BMP2/4
LOC121431952	0.583781	0.560328	0.669216	1.1165	0.437886	0.81344	1.12898	0.173575	0.29923	0.623136	0.694111	0.273493	bone_morphogenetic_protein_receptor_type-1B-like
LOC121411232	0.144759	0.276914	0.308651	0.397026	0.167004	0.103523	0.254622	0.0868497	0.101181	0.183526	0.908714	0.0570319	bone_morphogenetic_protein_receptor_type-2-like
LOC121424566	0.0518291	0.0119078	0.0484345	0.0320326	0.0093659	0.342957	0.0502394	0.0259551	0	0.00680532	0	0	growth/differentiation_factor_8-like
LOC121423913	0.138756	1.49581	0.118768	0.208409	0.0871885	0.0841423	1.78597	0.0933576	0.0451658	0.0990024	0.168268	0	growth/differentiation_factor_8-like
LOC121423561	0.025841	0.00305513	0.00729738	0.0376597	0.0157884	0	0	0.0121074	0	0	0	0	growth/differentiation_factor_8-like
LOC121426703	0.0521141	1.72448	0.0366656	0.247728	0.062726	1.25807	2.07819	0.060908	0.0591199	0.00899389	0.484104	0	growth/differentiation_factor_8-like
LOC121415689	0.0314152	0.110193	0.0801459	0.0588579	0.0748469	0.010086	0.216813	0.0105516	0	0.0354961	0.0442615	0	insulin-like_peptide_receptor
LOC121415814	0	0	0	0.0307821	0	0.0071028	0	0	0	0	0	0	insulin-like_peptide_receptor
LOC121414980	0	0.0646824	0.0393871	0.0776582	0	0	0	0	0	0	0	0	insulin-like_peptide_receptor
LOC121414981	0.0279864	0.0843138	0.0710477	0.0397649	0.0235623	0.00377203	0.0566071	0	0.0117217	0.00258315	0	0	insulin-like_peptide_receptor
LOC121415946	0.0107296	0.0388068	0.0171458	0.0360938	0.0167184	0.0361719	0.0766553	0	0.0115962	0.0241816	0	0	fibroblast_growth_factor_receptor_2-like
LOC121419550	0	0.0143968	0	0.0188605	0	0.0126795	0.00767702	0	0.0364633	0	0	0	fibroblast_growth_factor_receptor_3-like
LOC121431286	0.00486339	0	0	0.0128363	0	0	0	0	0	0	0	0	fibroblast_growth_factor_receptor_3-like
LOC121425598	2.73265	1.8643	7.61566	8.31613	3.13991	1.31265	2.53574	1.68449	0.596194	0.747054	1.32679	0.464129	fibroblast_growth_factor_receptor-like
LOC121425416	0.292138	0.203701	0.341691	0.906448	0.273011	0.158847	0.247984	0.223937	0.107812	0.0323918	0.13757	0.13483	fibroblast_growth_factor_receptor-like_1
LOC121405695	0.00442273	0.0046845	0.122785	0.0615234	0.0070954	0.0317594	0.110962	0	0	0	0	0	epidermal_growth_factor_receptor-like

## Sheet: Lv-5FBS_Diff_Expression
Table S6 – Single-cell RNA sequencing of L. variegatus cells cultured in UM with 5% FBS - Differential gene expression in each cluster relative to all other clusters (log2 fold change)
FeatureName	p_val	avg_log2FC	pct.1	pct.2	p_val_adj	cluster	Gene Description
LOC121431621	5.99e-169	1.45398	0.979	0.54	1.14e-164	0	SPARC-like
LOC121407892	2.5e-121	1.19479	0.877	0.408	4.77e-117	0	peptidyl-prolyl_cis-trans_isomerase_6-like
LOC121417233	3.15e-121	1.16794	0.951	0.62	6.01e-117	0	uncharacterized_LOC121417233
LOC121428399	1.51e-120	1.34492	0.873	0.467	2.89e-116	0	actin_CyI,_cytoplasmic
LOC121413185	1.58e-120	1.27849	0.805	0.32	3.01e-116	0
LOC121413184	5.14e-108	1.00911	0.784	0.338	9.81e-104	0
LOC121422018	5.86e-100	0.621678	0.997	0.932	1.12e-95	0	60S_acidic_ribosomal_protein_P0-like
LOC121429185	2.94e-97	0.940718	0.935	0.529	5.62e-93	0	collagen_alpha-1(V)_chain-like
LOC121420133	1.85e-95	0.476259	0.997	0.987	3.53e-91	0	40S_ribosomal_protein_S19-like
LOC121423374	2.23e-95	0.480621	0.999	0.988	4.26e-91	0	40S_ribosomal_protein_S2
LOC121427950	2.56e-94	1.07505	0.877	0.484	4.89e-90	0	uncharacterized_LOC121427950
LOC121410444	3.33e-82	1.04347	0.532	0.181	6.36e-78	0	metalloproteinase_inhibitor_1-like
LOC121415352	1.53e-79	0.447561	0.999	0.987	2.93e-75	0	40S_ribosomal_protein_S17-like
LOC121411673	1.63e-78	0.779705	0.938	0.657	3.11e-74	0	translocon-associated_protein_subunit_delta-like
LOC121415608	2.54e-75	0.440899	1	0.973	4.84e-71	0	60S_ribosomal_protein_L17-like
LOC121431806	1.19e-73	0.412791	0.999	0.992	2.27e-69	0	40S_ribosomal_protein_S24-like
LOC121429396	2.92e-73	0.388178	0.997	0.989	5.57e-69	0	60S_ribosomal_protein_L35a-like
LOC121428403	6.61e-73	0.392264	0.999	0.98	1.26e-68	0	40S_ribosomal_protein_S18
LOC121418892	8.89e-73	0.8483	0.673	0.306	1.7e-68	0	homeobox_protein_SIX6-like
LOC121431622	4.97e-72	0.978716	0.514	0.187	9.49e-68	0	uncharacterized_LOC121431622
LOC121426719	4.18e-71	0.412039	0.999	0.983	7.98e-67	0	60S_ribosomal_protein_L37a-like
LOC121417612	8.35e-71	0.384029	1	0.989	1.59e-66	0	40S_ribosomal_protein_S11-like
LOC121408801	2.79e-70	0.345748	1	0.999	5.34e-66	0	60S_acidic_ribosomal_protein_P2-like
LOC121411806	6.29e-70	0.414154	1	0.979	1.2e-65	0	60S_ribosomal_protein_L18a-like
LOC121408650	2.4e-68	0.404647	1	0.985	4.59e-64	0	60S_ribosomal_protein_L6-like
LOC121428378	7.72e-68	0.389862	1	0.979	1.47e-63	0	60S_ribosomal_protein_L35-like
LOC121431021	1.56e-66	0.379706	1	0.994	2.98e-62	0	40S_ribosomal_protein_S12-like
LOC121418185	6.48e-66	0.532522	0.95	0.571	1.24e-61	0	cell_surface_glycoprotein_1-like
LOC121425505	7.63e-66	0.377654	1	0.985	1.46e-61	0	60S_ribosomal_protein_L26-like
LOC121428227	8.51e-66	0.447372	0.997	0.982	1.63e-61	0	60S_ribosomal_protein_L11
LOC121420173	4.56e-65	0.675028	0.55	0.22	8.7e-61	0	uncharacterized_LOC121420173
LOC121420519	9.09e-64	0.384805	0.997	0.979	1.74e-59	0	40S_ribosomal_protein_S25-like
LOC121426250	1.02e-62	0.642253	0.926	0.556	1.95e-58	0	zinc_metalloproteinase_nas-39-like
LOC121410910	1.11e-62	0.712459	0.928	0.637	2.11e-58	0	endonuclease_8-like_2
LOC121411855	2.34e-62	0.430112	0.996	0.977	4.47e-58	0	40S_ribosomal_protein_S23
LOC121415559	4.07e-61	0.632809	0.928	0.661	7.77e-57	0	translocon-associated_protein_subunit_beta-like
LOC121428872	4.49e-61	0.378436	0.999	0.982	8.58e-57	0	60S_ribosomal_protein_L28-like
LOC121417553	5.32e-60	0.458992	0.997	0.928	1.02e-55	0	60S_ribosomal_protein_L15-like
LOC121416174	7.22e-59	0.364583	0.999	0.968	1.38e-54	0	60S_ribosomal_protein_L7-like
LOC121411121	1.33e-58	0.41581	0.992	0.943	2.55e-54	0	60S_ribosomal_protein_L23
LOC121431719	1.96e-58	0.361274	0.999	0.985	3.74e-54	0	40S_ribosomal_protein_S14a
LOC121423124	1.96e-58	0.9376	0.285	0.067	3.75e-54	0	uncharacterized_LOC121423124
LOC121420109	2.64e-58	0.353518	1	0.999	5.03e-54	0	60S_acidic_ribosomal_protein_P1-like
LOC121411428	4.68e-58	0.454978	0.992	0.912	8.94e-54	0	nucleoside_diphosphate_kinase_A_2-like
LOC121421046	3.74e-57	0.583314	0.655	0.317	7.14e-53	0	tetraspanin-6-like
LOC121416984	1.89e-56	0.988333	0.568	0.263	3.61e-52	0	uncharacterized_LOC121416984
LOC121413357	2.18e-56	0.381487	0.997	0.966	4.17e-52	0	40S_ribosomal_protein_S3a-like
LOC121415581	2.31e-56	0.666633	0.863	0.556	4.41e-52	0	keratinocyte-associated_protein_2-like
LOC121406022	1.23e-55	0.750119	0.468	0.186	2.35e-51	0	interferon_alpha-inducible_protein_27-like_protein_2A
LOC121426908	1.41e-55	0.497707	0.99	0.891	2.7e-51	0	insulin-like_growth_factor_2_mRNA-binding_protein_3
LOC121418169	1.68e-55	0.339005	0.997	0.985	3.22e-51	0	ubiquitin-like_protein_FUBI
LOC121422698	2.18e-55	0.342773	1	0.995	4.16e-51	0	40S_ribosomal_protein_S15a
LOC121410689	2.6e-55	0.64598	0.457	0.173	4.97e-51	0	collagen_alpha-1(I)_chain-like
LOC121409255	1.69e-54	0.350384	0.999	0.977	3.23e-50	0	60S_ribosomal_protein_L23a-like
LOC121420399	4.69e-54	0.515641	0.413	0.147	8.95e-50	0	kin_of_IRRE-like_protein_3
LOC121414416	4.75e-54	0.367725	0.995	0.956	9.07e-50	0	40S_ribosomal_protein_S4-like
LOC121422403	5.96e-54	0.321167	1	0.985	1.14e-49	0	60S_ribosomal_protein_L10-like
LOC121429627	7.59e-54	0.339547	0.89	0.491	1.45e-49	0	collagen_alpha-5(IV)_chain-like
LOC121417187	2.24e-53	0.357027	0.999	0.984	4.27e-49	0	60S_ribosomal_protein_L32-like
LOC121428545	2.47e-53	0.749996	0.483	0.201	4.72e-49	0	ficolin-3-like
LOC121405789	3.11e-53	-2.38081	0.098	0.368	5.95e-49	0	uncharacterized_LOC121405789
LOC121426136	2.24e-52	0.321993	1	0.992	4.27e-48	0	60S_ribosomal_protein_L27-like
LOC121431023	8.46e-52	0.32249	1	0.99	1.62e-47	0	40S_ribosomal_protein_S20-like
LOC121414332	1.14e-51	0.34068	0.999	0.982	2.17e-47	0	60S_ribosomal_protein_L13a-like
LOC121427605	5.78e-51	0.55481	0.943	0.736	1.1e-46	0	translocon-associated_protein_subunit_gamma-like
LOC121424525	8.44e-51	0.337654	0.996	0.968	1.61e-46	0	uncharacterized_LOC121424525
LOC121424809	7.88e-50	0.456046	0.484	0.202	1.51e-45	0	neuroblast_differentiation-associated_protein_AHNAK-like
LOC121422207	1.7e-49	0.302315	1	0.996	3.24e-45	0	40S_ribosomal_protein_S8-like
LOC121424994	5.84e-49	0.405173	0.999	0.985	1.12e-44	0	uncharacterized_LOC121424994
LOC121408679	6.48e-49	0.702672	0.379	0.135	1.24e-44	0	sodium/glucose_cotransporter_4-like
LOC121406318	3.09e-48	0.650549	0.721	0.421	5.9e-44	0	trichohyalin-like
LOC121418890	5.38e-47	0.542745	0.398	0.15	1.03e-42	0	homeobox_protein_SIX6-like
LOC121407061	1.42e-46	0.343831	0.999	0.964	2.72e-42	0	60S_ribosomal_protein_L13-like
LOC121416034	2.13e-46	0.372736	0.997	0.954	4.06e-42	0	40S_ribosomal_protein_S15-like
LOC121430841	2.18e-46	0.326154	0.997	0.982	4.16e-42	0	40S_ribosomal_protein_S21-like
LOC121421844	1.64e-45	0.465546	0.351	0.124	3.13e-41	0	von_Willebrand_factor_D_and_EGF_domain-containing_protein-like
LOC121429798	4.23e-45	0.434314	0.749	0.405	8.08e-41	0	collagen_alpha-5(IV)_chain-like
LOC121410168	9.1e-45	0.836542	0.446	0.194	1.74e-40	0	sodium-_and_chloride-dependent_GABA_transporter_1-like
LOC121429387	1.99e-44	0.340605	0.999	0.991	3.8e-40	0	40S_ribosomal_protein_S26-like
LOC121430882	2.23e-44	0.328903	0.999	0.974	4.26e-40	0	40S_ribosomal_protein_S7-like
LOC121420278	2.78e-44	0.32738	1	0.976	5.32e-40	0	ubiquitin
LOC121415228	6.03e-44	0.374807	0.996	0.948	1.15e-39	0	60S_ribosomal_protein_L36-like
LOC121427642	6.95e-44	0.517957	0.402	0.166	1.33e-39	0	uncharacterized_LOC121427642
LOC121428155	9.37e-44	0.365063	0.996	0.95	1.79e-39	0	eukaryotic_translation_initiation_factor_5A-1-like
LOC121410681	3.51e-43	0.645969	0.439	0.19	6.71e-39	0	uncharacterized_LOC121410681
LOC121410607	5.27e-43	0.527399	0.938	0.691	1.01e-38	0	high_mobility_group-T_protein-like
LOC121414511	1.41e-42	0.506496	0.768	0.44	2.69e-38	0	tubulin_alpha-2/alpha-4_chain-like
LOC121431737	3.17e-42	0.37696	0.674	0.355	6.06e-38	0	uncharacterized_LOC121431737
LOC121411554	9e-42	0.307645	0.996	0.982	1.72e-37	0	60S_ribosomal_protein_L9-like
LOC121405654	1.4e-41	0.460621	0.47	0.207	2.67e-37	0	interferon_alpha-inducible_protein_27-like_protein_1
LOC121422039	1.7e-41	0.566791	0.889	0.694	3.26e-37	0	40S_ribosomal_protein_S16-like
LOC121431925	3.31e-41	0.285723	1	0.992	6.33e-37	0	60S_ribosomal_protein_L34-B-like
LOC121416874	3.93e-41	0.456724	0.388	0.16	7.5e-37	0	sodium/myo-inositol_cotransporter_2-like
LOC121418776	1.04e-40	0.492838	0.82	0.523	1.98e-36	0	peptidyl-prolyl_cis-trans_isomerase_FKBP2-like
LOC121418654	2.02e-40	0.520679	0.48	0.223	3.86e-36	0	serum_response_factor-like
LOC121420512	4.97e-40	0.348442	0.995	0.945	9.49e-36	0	60S_ribosomal_protein_L19-like
LOC121430479	7.11e-40	0.438702	0.406	0.171	1.36e-35	0	transcription_factor_21-like
LOC121407689	6.12e-39	0.502021	0.294	0.103	1.17e-34	0	peptidyl-prolyl_cis-trans_isomerase_6-like
LOC121421553	7.36e-39	-0.952654	0.999	0.993	1.41e-34	0	soma_ferritin-like
LOC121419373	7.93e-39	0.493556	0.559	0.301	1.51e-34	0	multiple_coagulation_factor_deficiency_protein_2_homolog
LOC121430637	3.96e-38	0.489057	0.602	0.326	7.57e-34	0	transcription_factor_SOX-4-like
LOC121427612	8.21e-38	-2.35314	0.162	0.374	1.57e-33	0	apolipoprotein_D-like
LOC121423659	1.15e-37	0.408696	0.912	0.635	2.19e-33	0	peroxiredoxin-1-like
LOC121405677	1.56e-37	0.465421	0.454	0.212	2.98e-33	0	SH3_and_multiple_ankyrin_repeat_domains_protein_3-like
LOC121431895	3.92e-37	0.356113	0.354	0.14	7.49e-33	0	pituitary_homeobox_x-like
LOC121428312	5.29e-37	0.455062	0.999	0.961	1.01e-32	0	actin,_cytoskeletal_1A
LOC121407430	1.55e-36	0.483961	0.779	0.51	2.96e-32	0	uncharacterized_LOC121407430
LOC121421467	1.59e-36	0.440827	0.382	0.167	3.05e-32	0	calumenin-A-like
LOC121424968	1.67e-36	0.778096	0.569	0.316	3.19e-32	0	uncharacterized_LOC121424968
LOC121422889	2.37e-36	0.403979	0.984	0.868	4.52e-32	0	ATP_synthase_subunit_f,_mitochondrial-like
LOC121407387	4.19e-36	0.488847	0.279	0.096	8.01e-32	0	uncharacterized_LOC121407387
LOC121410429	6.32e-36	0.369699	0.358	0.148	1.21e-31	0	uncharacterized_LOC121410429
LOC121423636	7.11e-36	0.521206	0.93	0.76	1.36e-31	0	calreticulin-like
LOC121418432	7.23e-36	0.457083	0.871	0.563	1.38e-31	0	glycine-rich_RNA-binding_protein_1-like
LOC121418982	1.35e-35	0.291812	1	0.977	2.59e-31	0	ubiquitin-40S_ribosomal_protein_S27a
LOC121418955	1.47e-35	0.431873	0.965	0.798	2.81e-31	0	uncharacterized_LOC121418955
LOC121418780	3.13e-35	0.533284	0.528	0.271	5.97e-31	0	glutathione-specific_gamma-glutamylcyclotransferase_1-like
LOC121425875	3.57e-35	0.467296	0.897	0.639	6.82e-31	0	elongation_factor_1-beta-like
LOC121407423	5.8e-35	0.342199	0.992	0.929	1.11e-30	0	40S_ribosomal_protein_S3-like
LOC121423030	8.88e-35	0.418186	0.956	0.744	1.7e-30	0	ATP_synthase_subunit_d,_mitochondrial-like
LOC121427251	1.2e-34	0.422078	0.793	0.513	2.29e-30	0	dolichyl-diphosphooligosaccharide--protein_glycosyltransferase_48_kDa_subunit-like
LOC121427575	2.94e-34	0.778565	0.472	0.243	5.61e-30	0	transcription_factor_HES-4-like
LOC121421406	3.44e-34	0.434964	0.93	0.718	6.58e-30	0	protein_transport_protein_Sec61_subunit_beta-like
LOC121424436	4.02e-34	0.486493	0.712	0.423	7.67e-30	0	sodium-_and_chloride-dependent_glycine_transporter_1-like
LOC121407131	6.98e-34	0.51972	0.915	0.734	1.33e-29	0	60S_ribosomal_protein_L14-like
LOC121422594	8.26e-34	0.426424	0.413	0.194	1.58e-29	0	methyltransferase-like_protein_27
LOC121417155	1.86e-33	-1.27816	0.069	0.265	3.55e-29	0	glycine_N-methyltransferase-like
LOC121414299	2.42e-33	0.250223	0.999	0.985	4.61e-29	0	60S_ribosomal_protein_L24-like
LOC121432038	2.55e-33	0.359853	0.391	0.178	4.87e-29	0	atrophin-1-like
LOC121422800	4.07e-33	0.301326	0.997	0.968	7.78e-29	0	40S_ribosomal_protein_S9
LOC121429713	4.18e-33	0.417849	0.64	0.377	7.97e-29	0	collagen_alpha-1(I)_chain-like
LOC121413886	5.47e-33	0.4288	0.521	0.282	1.05e-28	0	heterogeneous_nuclear_ribonucleoprotein_R-like
LOC121430850	5.49e-33	0.357106	0.547	0.292	1.05e-28	0	protein_sprouty_homolog_3-like
LOC121412515	6.75e-33	0.260775	1	0.991	1.29e-28	0	60S_ribosomal_protein_L21-like
LOC121415315	8.3e-33	0.415405	0.635	0.368	1.59e-28	0	cyclic_AMP-responsive_element-binding_protein_3-like_protein_4
LOC121422297	1.26e-32	0.305303	0.994	0.952	2.41e-28	0	60S_ribosomal_protein_L18-like
LOC121423267	1.64e-32	0.322356	0.996	0.96	3.13e-28	0	histone_H3.3A
LOC121429286	3.1e-31	0.479457	0.538	0.3	5.91e-27	0	uncharacterized_LOC121429286
LOC121411735	3.62e-31	0.259534	1	0.99	6.92e-27	0	60S_ribosomal_protein_L31-like
LOC121425624	3.92e-31	0.401651	0.972	0.805	7.49e-27	0	uncharacterized_LOC121425624
LOC121421396	6.34e-31	0.293592	0.451	0.231	1.21e-26	0	low-density_lipoprotein_receptor-related_protein_6-like
LOC121417735	1.75e-30	0.361064	0.873	0.606	3.35e-26	0	eukaryotic_translation_initiation_factor_1-like
LOC121415508	2.08e-30	0.531725	0.272	0.105	3.97e-26	0	uncharacterized_LOC121415508
LOC121424678	8.92e-30	0.398227	0.79	0.513	1.7e-25	0	mitotic_apparatus_protein_p62-like
LOC121425929	9.99e-30	0.407891	0.918	0.697	1.91e-25	0	ADP-ribosylation_factor_1-like
LOC121431829	1.08e-29	0.425455	0.881	0.615	2.06e-25	0	ras_GTPase-activating_protein-binding_protein_2-like
LOC121423603	1.72e-29	-1.05713	0.202	0.39	3.29e-25	0	lateral_signaling_target_protein_2_homolog
LOC121424778	2.65e-29	0.510504	0.44	0.228	5.06e-25	0	early_growth_response_protein_1-B-like
LOC121411391	3.22e-29	0.38123	0.497	0.276	6.16e-25	0	epoxide_hydrolase_3-like
LOC121407001	3.52e-29	0.402344	0.404	0.197	6.72e-25	0	uncharacterized_LOC121407001
LOC121405821	4.84e-29	0.320459	0.994	0.934	9.24e-25	0	60S_ribosomal_protein_L10a-like
LOC121409075	4.86e-29	0.322185	0.991	0.927	9.29e-25	0	40S_ribosomal_protein_S5
LOC121410679	5.48e-29	0.323016	0.304	0.128	1.05e-24	0	uncharacterized_LOC121410679
LOC121419265	1.61e-28	0.467562	0.957	0.831	3.08e-24	0	heat_shock_protein_HSP_90-beta-like
LOC121431979	1.65e-28	-2.24485	0.18	0.354	3.16e-24	0	cell_wall_protein_IFF6-like
LOC121423461	1.95e-28	0.386334	0.26	0.104	3.73e-24	0	glutathione_peroxidase_7-like
LOC121415573	2.45e-28	0.4122	0.811	0.55	4.68e-24	0	proteasome_subunit_alpha_type-4-like
LOC121423514	2.82e-28	0.35195	0.305	0.127	5.39e-24	0	integumentary_mucin_C.1-like
LOC121405843	6.5e-28	0.361052	0.721	0.471	1.24e-23	0	proteasome_subunit_alpha_type-1-like
LOC121408810	6.86e-28	-1.22716	0.094	0.27	1.31e-23	0	glutathione_S-transferase_theta-1-like
LOC121418204	8.47e-28	0.388782	0.488	0.275	1.62e-23	0	sprouty-related,_EVH1_domain-containing_protein_2-like
LOC121430715	1.19e-27	0.403558	0.784	0.557	2.27e-23	0	peptidyl-prolyl_cis-trans_isomerase_FKBP1B-like
LOC121424701	1.21e-27	0.459849	0.312	0.136	2.3e-23	0	homeobox_protein_EMX1-like
LOC121410251	1.94e-27	0.309213	0.529	0.301	3.71e-23	0	transcription_factor_12-like
LOC121421134	2.66e-27	0.352719	0.748	0.506	5.08e-23	0	calumenin-like
LOC121416918	2.84e-27	0.317378	0.988	0.885	5.43e-23	0	60S_ribosomal_protein_L12-like
LOC121408645	3.32e-27	0.371368	0.816	0.559	6.34e-23	0	proteasome_maturation_protein-like
LOC121429095	3.88e-27	0.437754	0.819	0.602	7.42e-23	0	golgin_subfamily_A_member_6-like_protein_22
LOC121411549	6.35e-27	0.316311	0.257	0.101	1.21e-22	0	multiple_epidermal_growth_factor-like_domains_protein_6
LOC121427832	9.09e-27	0.276799	0.338	0.158	1.74e-22	0	glycosyltransferase_8_domain-containing_protein_1-like
LOC121411587	1.16e-26	-1.17062	0.243	0.42	2.22e-22	0	filamin-A-like
LOC121426330	1.32e-26	0.393135	0.906	0.695	2.52e-22	0	ATP_synthase_subunit_beta,_mitochondrial
LOC121425027	1.51e-26	0.422882	0.419	0.219	2.87e-22	0	F-box/LRR-repeat_protein_2-like
LOC121416505	1.55e-26	0.487236	0.382	0.194	2.96e-22	0	calponin-3-like
LOC121418824	2.73e-26	0.341926	0.96	0.749	5.21e-22	0	cytochrome_c_oxidase_subunit_7A2,_mitochondrial-like
LOC121408814	2.9e-26	0.363569	0.884	0.62	5.55e-22	0	dynein_light_chain_LC6,_flagellar_outer_arm-like
LOC121428202	5.91e-26	0.33453	0.981	0.839	1.13e-21	0	Y-box_factor_homolog
LOC121426055	6.47e-26	0.345643	0.939	0.761	1.24e-21	0	cytochrome_c-like
LOC121418191	6.56e-26	0.69428	0.334	0.16	1.25e-21	0	uncharacterized_LOC121418191
LOC446202	8.73e-26	0.294417	0.576	0.347	1.67e-21	0	beta-catenin
LOC121405795	8.87e-26	0.376439	0.895	0.674	1.69e-21	0	transmembrane_protein_258
LOC121428660	1.3e-25	0.361979	0.436	0.234	2.48e-21	0	uncharacterized_LOC121428660
LOC121410275	1.38e-25	0.268366	0.278	0.117	2.64e-21	0	mucin-17-like
LOC121414529	3.33e-25	0.366287	0.592	0.352	6.36e-21	0	tubulin_alpha-1_chain-like
LOC121431964	3.47e-25	0.325113	0.3	0.133	6.64e-21	0	vegetative_cell_wall_protein_gp1-like
LOC121409399	5.25e-25	-1.3305	0.114	0.282	1e-20	0	histone_H1-beta,_late_embryonic-like
LOC121427426	5.65e-25	0.368542	0.737	0.502	1.08e-20	0	prohibitin-2-like
LOC121410231	5.72e-25	0.505257	0.42	0.23	1.09e-20	0	glutamyl_aminopeptidase-like
LOC121409301	6.22e-25	0.368083	0.925	0.741	1.19e-20	0	cytochrome_c_oxidase_subunit_6A,_mitochondrial-like
LOC121431885	6.53e-25	-1.51252	0.146	0.311	1.25e-20	0	histone_H4
LOC121423170	7.94e-25	-1.11317	0.59	0.642	1.52e-20	0	CD63_antigen-like
LOC121423946	1.3e-24	0.296941	0.42	0.228	2.47e-20	0	cysteine/serine-rich_nuclear_protein_1-like
LOC121408173	1.63e-24	-1.44567	0.536	0.653	3.11e-20	0	nucleoredoxin-like
LOC121414451	2.33e-24	0.317976	0.953	0.779	4.45e-20	0	40S_ribosomal_protein_S4-like
LOC121426894	3.75e-24	0.379702	0.665	0.434	7.16e-20	0	zinc_finger_protein_706-like
LOC121420574	3.8e-24	0.368547	0.699	0.461	7.26e-20	0	polyadenylate-binding_protein_4-like
LOC121419686	5.54e-24	0.373414	0.424	0.23	1.06e-19	0	transcription_factor_GATA-3-like
LOC121419549	5.93e-24	0.482662	0.682	0.477	1.13e-19	0	60S_ribosomal_protein_L30-like
LOC121411555	6.12e-24	0.320464	0.977	0.83	1.17e-19	0	uncharacterized_LOC121411555
LOC121424922	9.33e-24	0.361361	0.934	0.725	1.78e-19	0	small_nuclear_ribonucleoprotein_G-like
LOC121428341	1.3e-23	0.32551	0.913	0.677	2.49e-19	0	protein_SET-like
LOC121424047	1.48e-23	0.366677	0.934	0.72	2.83e-19	0	ATP_synthase_subunit_delta,_mitochondrial-like
LOC121410320	1.68e-23	0.356045	0.903	0.704	3.2e-19	0	heterogeneous_nuclear_ribonucleoprotein_A3-like
LOC121411101	1.75e-23	0.351447	0.298	0.138	3.35e-19	0	arylsulfatase_A-like
LOC121419271	2.11e-23	0.555542	0.58	0.381	4.02e-19	0	cell_division_control_protein_42_homolog
LOC121410178	2.13e-23	0.349331	0.865	0.615	4.07e-19	0	heterogeneous_nuclear_ribonucleoprotein_A3-like
LOC121422490	2.59e-23	0.311476	0.957	0.804	4.94e-19	0	cytochrome_c_oxidase_subunit_6B1-like
LOC121410947	3.34e-23	0.378904	0.863	0.617	6.38e-19	0	high_mobility_group_protein_1_homolog
LOC121411662	3.37e-23	0.359188	0.871	0.658	6.43e-19	0	phosphate_carrier_protein,_mitochondrial-like
LOC121418700	3.7e-23	0.331259	0.916	0.702	7.06e-19	0	elongation_factor_1-gamma-like
LOC121425063	5.28e-23	0.344802	0.683	0.458	1.01e-18	0	26S_proteasome_non-ATPase_regulatory_subunit_4-like
LOC121428698	9.43e-23	0.295194	0.982	0.839	1.8e-18	0	60S_ribosomal_protein_L7a-like
LOC121431687	1.25e-22	0.332241	0.977	0.882	2.39e-18	0	voltage-dependent_anion-selective_channel_protein_2-like
LOC121423462	1.44e-22	0.325317	0.475	0.287	2.75e-18	0	single-stranded_DNA-binding_protein_3-like
LOC121415652	1.53e-22	0.348717	0.591	0.372	2.91e-18	0	microtubule-associated_protein_1B-like
LOC121427486	1.58e-22	0.268109	0.476	0.278	3.01e-18	0	2-phosphoxylose_phosphatase_1-like
LOC121413980	4.93e-22	0.29366	0.567	0.351	9.41e-18	0	heterogeneous_nuclear_ribonucleoprotein_R-like
LOC121424577	5.89e-22	0.31154	0.885	0.649	1.13e-17	0	uncharacterized_LOC121424577
LOC121418701	7.21e-22	-1.42805	0.349	0.467	1.38e-17	0	neuroblast_differentiation-associated_protein_AHNAK-like
LOC121425510	1.04e-21	0.25964	0.468	0.264	1.98e-17	0	uncharacterized_LOC121425510
LOC121408698	1.64e-21	0.289129	0.724	0.5	3.13e-17	0	RNA-binding_protein_cabeza-like
LOC121425645	1.73e-21	0.33672	0.64	0.433	3.3e-17	0	lupus_La_protein_homolog
LOC121429165	2.05e-21	0.255623	0.424	0.244	3.91e-17	0	uncharacterized_LOC121429165
LOC121418263	2.18e-21	0.275631	0.521	0.306	4.16e-17	0	calmodulin
LOC121422190	2.42e-21	0.290535	0.658	0.446	4.62e-17	0	ER_lumen_protein-retaining_receptor_2
LOC121422269	3.1e-21	0.268735	0.851	0.609	5.91e-17	0	protein_disulfide-isomerase-like
LOC121407829	3.51e-21	0.331521	0.554	0.361	6.71e-17	0	uncharacterized_LOC121407829
LOC121407665	3.61e-21	0.291702	0.295	0.146	6.89e-17	0	sodium-_and_chloride-dependent_glycine_transporter_1-like
LOC121427570	4.42e-21	0.308835	0.599	0.39	8.45e-17	0	vigilin-like
LOC121407440	6.56e-21	0.29332	0.419	0.238	1.25e-16	0	large_neutral_amino_acids_transporter_small_subunit_1-like
LOC121411589	1.11e-20	0.278498	0.506	0.312	2.13e-16	0	protein_LLP_homolog
LOC121408889	1.27e-20	0.267947	0.618	0.394	2.42e-16	0	serine/arginine-rich_splicing_factor_1-like
LOC121415818	2.05e-20	0.354876	0.854	0.619	3.92e-16	0	ATP_synthase_subunit_alpha,_mitochondrial-like
LOC121418514	2.28e-20	-1.22313	0.988	0.94	4.35e-16	0	uncharacterized_LOC121418514
LOC121420210	2.5e-20	0.355608	0.89	0.678	4.78e-16	0	ATP_synthase-coupling_factor_6,_mitochondrial-like
LOC121430149	2.56e-20	0.253168	0.816	0.576	4.89e-16	0	glypican-6-like
LOC121417536	3.19e-20	0.306119	0.966	0.833	6.09e-16	0	60S_ribosomal_protein_L15-like
LOC121429542	3.95e-20	0.28981	0.559	0.357	7.54e-16	0	muscleblind-like_protein_3
LOC121409121	7.69e-20	0.281923	0.582	0.381	1.47e-15	0	thioredoxin_domain-containing_protein_17-like
LOC121432077	8.23e-20	0.252528	0.986	0.917	1.57e-15	0	heterogeneous_nuclear_ribonucleoprotein_D-like
LOC121421007	1.11e-19	0.306811	0.917	0.7	2.12e-15	0	ATPase_inhibitor_A,_mitochondrial-like
LOC121419382	1.15e-19	-0.786435	0.153	0.304	2.2e-15	0	delta(14)-sterol_reductase_TM7SF2-like
LOC121408870	1.66e-19	0.289763	0.367	0.207	3.18e-15	0	DNA_ligase_1-like
LOC121408762	1.75e-19	0.294305	0.532	0.337	3.34e-15	0	piwi-like_protein_1
LOC121425503	2.13e-19	0.258107	0.392	0.218	4.07e-15	0	transcription_factor_AP-4-like
LOC121424298	2.88e-19	0.312977	0.335	0.184	5.5e-15	0	protein_PET100_homolog,_mitochondrial-like
LOC121409216	5.67e-19	0.296787	0.652	0.442	1.08e-14	0	aminoacyl_tRNA_synthase_complex-interacting_multifunctional_protein_1-like
LOC121407278	6.52e-19	0.257194	0.408	0.238	1.24e-14	0	small_nuclear_ribonucleoprotein-associated_protein_B'-like
LOC121427522	7.18e-19	0.385753	0.373	0.214	1.37e-14	0	transcription_factor_HES-1-like
LOC121411302	1.05e-18	0.261968	0.997	0.942	2e-14	0	ATP_synthase_F(0)_complex_subunit_C1,_mitochondrial-like
LOC121428833	1.1e-18	-1.67013	0.144	0.285	2.1e-14	0	heat_shock_70_kDa_protein_IV
LOC121415500	1.29e-18	-1.29832	0.118	0.255	2.46e-14	0	late_histone_H1
LOC121412862	1.63e-18	0.250384	0.705	0.486	3.12e-14	0	transcriptional_regulator_ATRX_homolog
LOC121410179	1.95e-18	0.297249	0.82	0.609	3.72e-14	0	nascent_polypeptide-associated_complex_subunit_alpha-like
LOC121431788	2.08e-18	0.27479	0.344	0.192	3.98e-14	0	nucleolar_RNA_helicase_2-like
LOC121431800	2.26e-18	0.267146	0.969	0.792	4.31e-14	0	histone_H2A.V
LOC121430846	3.46e-18	0.304209	0.893	0.693	6.62e-14	0	cytochrome_c_oxidase_subunit_5B,_mitochondrial-like
LOC121405715	3.73e-18	0.261121	0.26	0.125	7.13e-14	0	uncharacterized_LOC121405715
LOC121419906	5.67e-18	0.303653	0.916	0.744	1.08e-13	0	ATP_synthase_subunit_g,_mitochondrial-like
LOC121430638	5.82e-18	-1.40028	0.395	0.499	1.11e-13	0	monocarboxylate_transporter_2-like
LOC121413537	5.9e-18	0.254498	0.409	0.244	1.13e-13	0	non-POU_domain-containing_octamer-binding_protein-like
LOC121415660	6.58e-18	0.260574	0.745	0.515	1.26e-13	0	activated_RNA_polymerase_II_transcriptional_coactivator_p15-like
LOC121408825	6.64e-18	0.288381	0.78	0.568	1.27e-13	0	uncharacterized_LOC121408825
LOC121428669	7.68e-18	0.253605	0.63	0.435	1.47e-13	0	endothelial_differentiation-related_factor_1-like
LOC121430559	8.21e-18	0.300784	0.351	0.197	1.57e-13	0	transcription_factor_AP-2-alpha-like
LOC121407996	8.67e-18	0.267977	0.872	0.677	1.66e-13	0	eukaryotic_translation_initiation_factor_2_subunit_2-like
LOC121426295	9.11e-18	-1.04206	0.133	0.273	1.74e-13	0	voltage-dependent_L-type_calcium_channel_subunit_beta-1-like
LOC121431701	1.14e-17	-1.60699	0.259	0.373	2.18e-13	0	S-crystallin_SL11-like
LOC121416321	1.16e-17	0.308259	0.316	0.171	2.21e-13	0	46_kDa_FK506-binding_nuclear_protein-like
LOC121418266	1.22e-17	0.313261	0.316	0.173	2.33e-13	0	prospero_homeobox_protein_1-like
LOC121424764	1.6e-17	0.281442	0.48	0.304	3.05e-13	0	nucleolar_protein_56-like
LOC121423686	1.66e-17	0.304018	0.493	0.32	3.17e-13	0	probable_rRNA-processing_protein_EBP2
LOC121413578	1.86e-17	-1.1672	0.444	0.553	3.56e-13	0	uncharacterized_LOC121413578
LOC121425394	2.09e-17	0.277382	0.897	0.689	3.99e-13	0	uncharacterized_LOC121425394
LOC121429862	2.36e-17	0.267846	0.772	0.562	4.51e-13	0	uncharacterized_LOC121429862
LOC121407090	2.43e-17	0.260343	0.741	0.518	4.63e-13	0	translocon-associated_protein_subunit_alpha-like
LOC121410751	2.45e-17	0.262793	0.405	0.243	4.68e-13	0	ETS_translocation_variant_1-like
LOC121432033	3.31e-17	0.279904	0.962	0.793	6.33e-13	0	guanine_nucleotide-binding_protein_subunit_beta-2-like_1
LOC121431277	3.77e-17	0.283883	0.909	0.712	7.21e-13	0	cytochrome_b-c1_complex_subunit_8-like
LOC121416346	4.22e-17	0.276119	0.386	0.23	8.06e-13	0	46_kDa_FK506-binding_nuclear_protein-like
LOC121408139	4.64e-17	0.264449	0.776	0.551	8.85e-13	0	proteasome_subunit_beta_type-5-like
LOC121423762	4.88e-17	-1.28283	0.602	0.635	9.33e-13	0	dnaJ_homolog_subfamily_B_member_4-like
LOC121415367	8.44e-17	-2.86634	0.361	0.452	1.61e-12	0	arylsulfatase-like
LOC121415187	9.71e-17	-0.928672	0.206	0.345	1.85e-12	0	histone-lysine_N-methyltransferase_ASH1L-like
LOC121407357	1.24e-16	0.285899	0.365	0.21	2.37e-12	0	ATP-dependent_RNA_helicase_DDX1-like
LOC121408705	1.24e-16	0.294403	0.926	0.721	2.37e-12	0	cytochrome_c_oxidase_subunit_4_isoform_1,_mitochondrial-like
LOC121418747	1.29e-16	-1.24346	0.369	0.485	2.47e-12	0	arginine_kinase-like
LOC121412103	1.52e-16	0.280284	0.449	0.287	2.91e-12	0	protein_eyes_shut-like
LOC121405615	2.14e-16	-1.50111	0.505	0.58	4.1e-12	0	U6_spliceosomal_RNA
LOC121423682	2.5e-16	0.293145	0.74	0.518	4.78e-12	0	sodium-_and_chloride-dependent_glycine_transporter_1-like
LOC121423024	2.58e-16	0.281085	0.763	0.555	4.93e-12	0	acyl_carrier_protein,_mitochondrial-like
LOC121419306	3.22e-16	-1.30512	0.265	0.387	6.14e-12	0	uncharacterized_LOC121419306
LOC121423785	5.73e-16	0.294647	0.458	0.292	1.09e-11	0	Krueppel-like_factor_6
LOC121428158	5.81e-16	0.266363	0.767	0.56	1.11e-11	0	cytochrome_b-c1_complex_subunit_7-like
LOC121415804	6.03e-16	0.261876	0.93	0.726	1.15e-11	0	40S_ribosomal_protein_S6-like
LOC121429453	9.61e-16	0.263379	0.475	0.307	1.84e-11	0	H/ACA_ribonucleoprotein_complex_subunit_DKC1-like
LOC121419389	1.73e-15	0.332571	0.781	0.6	3.3e-11	0	mRNA_decay_activator_protein_ZFP36L2-A-like
LOC121422505	1.83e-15	-1.67607	0.367	0.439	3.5e-11	0	uncharacterized_LOC121422505
LOC121410481	2.24e-15	0.262333	0.473	0.316	4.28e-11	0	dolichyl-diphosphooligosaccharide--protein_glycosyltransferase_subunit_1-like
LOC121410360	3.59e-15	0.259069	0.261	0.141	6.87e-11	0	multiple_epidermal_growth_factor-like_domains_protein_11
LOC121408954	5.71e-15	0.334469	0.351	0.212	1.09e-10	0	tektin-1-like
LOC121410666	5.86e-15	0.278032	0.943	0.786	1.12e-10	0	protein_BTG1-like
LOC121411899	2.4e-14	-1.10611	0.18	0.297	4.58e-10	0	ankyrin_repeat_domain-containing_protein_27-like
LOC121426284	2.8e-14	-1.14713	0.611	0.632	5.35e-10	0	uncharacterized_LOC121426284
LOC121409320	4.03e-14	0.253048	0.862	0.696	7.7e-10	0	high_mobility_group_protein_1_homolog
LOC121423984	4.9e-14	0.274222	0.849	0.674	9.36e-10	0	cytochrome_b-c1_complex_subunit_6,_mitochondrial-like
LOC121432057	5.27e-14	-1.05272	0.166	0.285	1.01e-09	0	monocarboxylate_transporter_13-like
LOC121428778	7.03e-14	-1.4256	0.146	0.264	1.34e-09	0	heat_shock_70_kDa_protein_IV-like
LOC121428219	1.79e-13	-0.616634	0.86	0.782	3.43e-09	0	vesicle-associated_membrane_protein_3-like
LOC121421513	2.14e-13	-0.826847	0.432	0.516	4.1e-09	0	tetraspanin-18-like
LOC121423966	2.9e-12	0.262509	0.843	0.648	5.54e-08	0	phospholipase_A2-like
LOC121423587	3.11e-12	0.260103	0.301	0.184	5.94e-08	0	A_disintegrin_and_metalloproteinase_with_thrombospondin_motifs_6-like
LOC121431605	3.94e-12	-0.71007	0.617	0.622	7.53e-08	0	gelsolin-like_protein_1
LOC121430760	5.3e-12	-1.28679	0.186	0.296	1.01e-07	0	actin_CyI,_cytoplasmic-like
LOC121428589	5.95e-12	-1.02682	0.149	0.254	1.14e-07	0	voltage-dependent_calcium_channel_type_A_subunit_alpha-1-like
LOC121430031	7.23e-12	-0.868119	0.549	0.591	1.38e-07	0	arginine_and_glutamate-rich_protein_1-like
gene-DR311-mgr01	7.49e-12	-0.311907	1	1	1.43e-07	0
LOC121424934	8.05e-12	-1.99514	0.217	0.31	1.54e-07	0	myosin_light_chain_kinase,_smooth_muscle-like
LOC121409705	2.09e-11	-0.610839	0.167	0.276	3.99e-07	0	peptide_methionine_sulfoxide_reductase-like
LOC121425475	2.22e-11	-0.813932	0.241	0.345	4.23e-07	0	CREB3_regulatory_factor-like
LOC121416938	3.28e-11	-0.406834	0.51	0.632	6.27e-07	0	60S_ribosomal_protein_L12-like
LOC121414417	3.33e-11	0.470741	0.285	0.175	6.35e-07	0	alpha-taxilin-like
LOC121407258	5.61e-11	-0.906596	0.162	0.259	1.07e-06	0	development-specific_protein_LVN1.2-like
LOC121415634	3.69e-10	-0.695437	0.18	0.274	7.04e-06	0	glutamate_receptor_3-like
LOC121407826	7.57e-10	-0.58416	0.191	0.289	1.45e-05	0	tubulin_beta_chain-like
LOC121410394	8.29e-10	0.259221	0.263	0.161	1.58e-05	0	diamine_acetyltransferase_1-like
LOC121428859	1.66e-09	-0.261592	0.488	0.327	3.18e-05	0	hemicentin-1-like
LOC121424881	1.95e-09	-0.686521	0.728	0.558	3.72e-05	0	actin,_cytoskeletal
LOC121415190	2.5e-09	-0.941318	0.405	0.465	4.77e-05	0	bcl-2-like_protein_2
LOC121422407	4.26e-09	-0.717695	0.92	0.862	8.14e-05	0	histone_H1-delta-like
LOC121415161	5.94e-09	-0.503834	0.74	0.693	0.00011336	0	receptor_expression-enhancing_protein_5-like
LOC121425227	8.28e-09	-1.31996	0.213	0.294	0.000158148	0	centrosomal_protein_of_55_kDa-like
LOC121421934	1.83e-08	-0.730443	0.204	0.294	0.000349931	0	supervillin-like
LOC121407392	2.12e-08	-0.562792	0.202	0.285	0.000405351	0	subtilisin-chymotrypsin_inhibitor-2B-like
LOC121418502	2.7e-08	-1.47732	0.18	0.257	0.000514977	0	calmodulin
LOC121425834	2.74e-08	-0.735919	0.556	0.37	0.000523167	0	muscle_M-line_assembly_protein_unc-89-like
LOC121411616	4.65e-08	-0.673831	0.256	0.337	0.000888467	0	vacuolar_protein_sorting-associated_protein_13C-like
LOC121423241	9.87e-08	-0.559804	0.226	0.31	0.00188449	0	cell_death-inducing_p53-target_protein_1_homolog
LOC121431809	1.02e-07	-0.581404	0.168	0.254	0.00193938	0	ankyrin-2-like
LOC121415925	1.19e-07	-0.591654	0.378	0.435	0.00228227	0	uncharacterized_LOC121415925
LOC121426050	1.67e-07	-0.596054	0.208	0.288	0.00318906	0	serine/threonine-protein_kinase_17A-like
LOC121424948	3.69e-07	-1.79086	0.461	0.482	0.00704246	0	uncharacterized_LOC121424948
LOC121415785	4.25e-07	-0.591135	0.49	0.522	0.00812271	0	polyubiquitin-C
LOC121423169	5.01e-07	-0.98208	0.232	0.294	0.0095602	0	histone_H4
LOC121427468	6.79e-07	-0.578411	0.714	0.63	0.0129674	0	tubulin_beta_chain-like
LOC121418567	7.36e-07	-0.746816	0.517	0.521	0.0140651	0	uncharacterized_LOC121418567
LOC121429599	7.51e-07	-0.700307	0.58	0.568	0.0143409	0	mid1-interacting_protein_1A-like
LOC121420938	8.49e-07	-0.256971	0.763	0.8	0.0162205	0	40S_ribosomal_protein_S16-like
LOC121416906	2.67e-06	-0.332535	0.413	0.292	0.051073	0	uncharacterized_LOC121416906
LOC121414524	3.12e-06	-0.751088	0.294	0.345	0.0596791	0	tubulin_alpha-1_chain-like
LOC121427769	3.98e-06	-0.901616	0.384	0.437	0.0760701	0	ATP-dependent_translocase_ABCB1-like
LOC121425598	4.34e-06	-0.256269	0.657	0.487	0.082912	0	fibroblast_growth_factor_receptor-like
LOC121431611	5.09e-06	-0.679605	0.201	0.265	0.0971731	0	gelsolin-like_protein_2
LOC121431393	5.43e-06	-0.533459	0.193	0.263	0.103776	0	phosphatase_and_actin_regulator_2-like
LOC121423320	7.36e-06	-0.574939	0.568	0.551	0.140497	0	rho_GDP-dissociation_inhibitor_1-like
LOC121431818	8.88e-06	-0.488	0.215	0.283	0.169568	0	uncharacterized_LOC121431818
LOC121408757	1.08e-05	-0.452749	0.243	0.31	0.2057	0	fructose-bisphosphate_aldolase,_muscle_type-like
LOC121416922	1.08e-05	-0.424384	0.858	0.777	0.207201	0	transcriptional_activator_protein_Pur-beta-like
LOC121431114	1.47e-05	-0.560782	0.207	0.269	0.280044	0	elongation_factor_1-alpha_2-like
LOC121430745	1.7e-05	-0.632738	0.471	0.482	0.324487	0	annexin_A13-like
LOC121410556	1.86e-05	-0.306585	0.972	0.887	0.355229	0	procathepsin_L-like
LOC121424812	3.19e-05	-0.627522	0.357	0.399	0.608604	0	gamma-adducin-like
LOC121423635	3.42e-05	-0.508057	0.233	0.29	0.654137	0	calcyphosin-like_protein
LOC121418977	3.64e-05	-0.614196	0.273	0.335	0.694913	0	mitogen-activated_protein_kinase-binding_protein_1-like
LOC121430517	9.75e-05	-0.450167	0.198	0.257	1	0	microtubule-actin_cross-linking_factor_1-like
LOC121429660	9.84e-05	-0.418936	0.206	0.264	1	0	uncharacterized_LOC121429660
LOC121432004	0.00013587	-1.7302	0.254	0.301	1	0	interferon_alpha-inducible_protein_27,_mitochondrial-like
LOC121416715	0.000171902	-0.476398	0.211	0.268	1	0	uncharacterized_LOC121416715
LOC121410368	0.000244645	-0.466353	0.6	0.57	1	0	talin-1-like
LOC121422281	0.000245234	-0.454772	0.854	0.784	1	0	ATP-dependent_RNA_helicase_dbp2-like
LOC121422319	0.000257188	-0.490115	0.625	0.594	1	0	probable_serine_incorporator
LOC121409056	0.000272783	-0.329289	0.347	0.259	1	0	teneurin-3-like
LOC121423305	0.000364295	-0.529819	0.411	0.438	1	0	suppressor_of_cytokine_signaling_2-like
LOC121410924	0.000459728	-0.591996	0.257	0.307	1	0	neuronal_cell_adhesion_molecule-like
LOC121423799	0.000504793	-0.783356	0.788	0.706	1	0	MAP_kinase-interacting_serine/threonine-protein_kinase_1-like
LOC121408202	0.0005203	-0.407295	0.303	0.232	1	0	A-kinase_anchor_protein_1,_mitochondrial-like
LOC121423315	0.000565063	-0.419572	0.221	0.274	1	0	methionine-R-sulfoxide_reductase_B1-like
LOC121406199	0.000589944	-0.554324	0.691	0.633	1	0	cryptochrome-1-like
LOC121417517	0.000616976	-0.826892	0.286	0.211	1	0	uncharacterized_LOC121417517
LOC121418945	0.000719961	-0.493966	0.316	0.357	1	0	microtubule-associated_proteins_1A/1B_light_chain_3C-like
LOC121423705	0.00085266	-0.261029	0.97	0.909	1	0	profilin-like
LOC121411553	0.000889901	-0.770086	0.56	0.555	1	0	uncharacterized_LOC121411553
LOC121419247	0.00117617	-0.535571	0.215	0.256	1	0	regulator_of_G-protein_signaling_7-like
LOC121417027	0.00123317	-1.63865	0.248	0.277	1	0	uncharacterized_LOC121417027
LOC121407319	0.00138192	-0.250777	0.325	0.251	1	0	dachshund_homolog_1-like
LOC121431725	0.00143064	-0.549605	0.254	0.294	1	0	uncharacterized_LOC121431725
LOC121411357	0.00151453	-0.257905	0.33	0.259	1	0	uncharacterized_LOC121411357
LOC121411305	0.00161936	-0.33408	0.836	0.749	1	0	guanine_nucleotide-binding_protein_G(q)_subunit_alpha-like
LOC121411455	0.00178077	-0.404727	0.252	0.296	1	0	cAMP-dependent_protein_kinase_type_II_regulatory_subunit
LOC121422290	0.00192893	-0.485982	0.234	0.278	1	0	rho_GTPase-activating_protein_17-like
LOC121418682	0.00198263	-0.633714	0.519	0.504	1	0	monocarboxylate_transporter_13-like
LOC121419865	0.00217492	-0.451322	0.27	0.305	1	0	acyl-CoA_6-desaturase-like
LOC121414333	0.00275521	-0.374462	0.767	0.671	1	0	superoxide_dismutase_[Cu-Zn]-like
LOC121407840	0.00348264	-0.572468	0.26	0.285	1	0	ribonucleoside-diphosphate_reductase_large_subunit-like
LOC121409049	0.00421042	-0.452786	0.408	0.419	1	0	coronin-6-like
LOC446190	0.00477242	-0.346185	0.929	0.83	1	0	guanine_nucleotide-binding_protein_G(i)_alpha_subunit
LOC447795	0.00533833	-0.265446	0.383	0.312	1	0	notch
LOC121407898	0.00595982	-0.52542	0.361	0.38	1	0	nuclear_factor_of_activated_T-cells_5-like
LOC121422780	0.00769223	-0.471709	0.591	0.561	1	0	myosin-11-like
LOC121405697	0.0083736	-0.589629	0.451	0.454	1	0	anoctamin-4-like
LOC121423851	0.0102107	-0.6352	0.845	0.798	1	0	uncharacterized_LOC121423851
LOC121414602	0.0126526	-0.393707	0.272	0.211	1	0	tumor_necrosis_factor_receptor_superfamily_member_16-like
LOC121428758	0.0128855	-0.533704	0.58	0.521	1	0	peroxiredoxin-6-like
LOC121414262	0.0130962	-0.473552	0.568	0.549	1	0	uncharacterized_LOC121414262
LOC121420063	0.0136316	-0.962705	0.498	0.481	1	0	AAC-rich_mRNA_clone_AAC4_protein-like
LOC121427339	0.0150204	-0.486043	0.415	0.416	1	0	EF-hand_domain-containing_protein_D2_homolog
LOC121422183	0.0154231	-0.491699	0.418	0.421	1	0	myosin-10-like
LOC121411767	0.0162129	-0.480221	0.754	0.683	1	0	uncharacterized_LOC121411767
LOC121419232	0.0169048	-0.458607	0.238	0.269	1	0	spastin-like
LOC121408564	0.01836	-0.494273	0.6	0.561	1	0	large_neutral_amino_acids_transporter_small_subunit_4-like
LOC121405576	0.0217031	-0.306923	0.25	0.196	1	0	collagen_alpha-2(IX)_chain-like
LOC121410754	0.0217119	-0.515013	0.257	0.285	1	0	diacylglycerol_kinase_beta-like
LOC121411425	0.022167	-0.397727	0.604	0.542	1	0	methylsterol_monooxygenase_1-like
LOC121423867	0.0228217	-0.493582	0.433	0.427	1	0	polypyrimidine_tract-binding_protein_1-like
LOC121410156	0.0258692	-0.356352	0.256	0.285	1	0	nucleolar_protein_dao-5-like
LOC121411556	0.0280728	-0.487099	0.762	0.707	1	0	thyrotroph_embryonic_factor-like
LOC121407459	0.0314146	-0.312303	0.256	0.207	1	0	zinc_finger_protein_SNAI2-like
LOC121415027	0.0323519	-0.387053	0.931	0.857	1	0	tropomyosin-like
LOC121423558	0.032363	-0.648861	0.512	0.49	1	0	uncharacterized_LOC121423558
LOC121410715	0.0332956	-0.403621	0.382	0.382	1	0	calcium-binding_protein_P-like
LOC121421063	0.0337466	-0.318973	0.649	0.58	1	0	ADP-ribosylation_factor_2
LOC121405894	0.0353778	-0.618102	0.256	0.279	1	0	synaptotagmin-1-like
LOC121425126	0.0370189	-1.02622	0.485	0.458	1	0	myosin_regulatory_light_chain_12A-like
LOC121421511	0.0373658	-0.368048	0.242	0.265	1	0	protein_kinase_C_and_casein_kinase_substrate_in_neurons_protein_1-like
LOC121422412	0.0392933	-0.414135	0.313	0.335	1	0	WASH_complex_subunit_2-like
LOC121421404	0.0414143	-0.471944	0.3	0.316	1	0	formin-binding_protein_4-like
LOC121431731	0.0448216	-0.34737	0.225	0.251	1	0	stearoyl-CoA_desaturase_5-like
LOC121428205	0.0492827	-0.32374	0.27	0.294	1	0	E3_ubiquitin-protein_ligase_RNF19A-like
LOC121410468	0.0514293	-0.460424	0.327	0.339	1	0	TRAF3-interacting_protein_1-like
LOC121418919	0.0526183	-0.3962	0.321	0.338	1	0	protein_enabled_homolog
LOC121418929	0.0532495	-0.757617	0.344	0.35	1	0	circularly_permutated_Ras_protein_1-like
LOC121410968	0.0562379	-0.25483	0.237	0.263	1	0	protein_lifeguard_2-like
LOC121427376	0.0654625	-0.333242	0.523	0.496	1	0	enolase-like
LOC121424097	0.0661889	-0.310453	0.25	0.212	1	0	uncharacterized_LOC121424097
LOC121406090	0.0665401	-0.298879	0.771	0.62	1	0	protein_phosphatase_1_regulatory_subunit_12B-like
LOC121418566	0.0705345	-0.526423	0.744	0.648	1	0	uncharacterized_LOC121418566
LOC121418790	0.0715101	-0.317939	0.295	0.246	1	0	kinesin_light_chain
LOC121431423	0.0767959	-0.423428	0.292	0.304	1	0	syntenin-1-like
LOC121413780	0.0854719	-0.70742	0.326	0.326	1	0	sequestosome-1-like
LOC121419157	0.0859137	-0.789173	0.308	0.318	1	0	cytochrome_P450_3A6-like
LOC121406364	0.0904292	-0.282979	0.674	0.56	1	0	uncharacterized_LOC121406364
LOC121408906	0.0911897	-0.253918	0.352	0.295	1	0	active_breakpoint_cluster_region-related_protein-like
LOC121408096	0.0912049	-0.287891	0.444	0.382	1	0	pre-mRNA-splicing_factor_ATP-dependent_RNA_helicase_PRP16-like
LOC121411954	0.0933445	-0.34499	0.539	0.445	1	0	FYVE,_RhoGEF_and_PH_domain-containing_protein_6-like
LOC121415564	0.10048	-0.348711	0.464	0.393	1	0	chromodomain-helicase-DNA-binding_protein_2-like
LOC121414246	0.101278	-0.507021	0.591	0.539	1	0	V-type_proton_ATPase_16_kDa_proteolipid_subunit-like
LOC121419144	0.101621	-0.557064	0.322	0.327	1	0	dual_specificity_protein_phosphatase_10-like
LOC121432238	0.102525	-0.528516	0.357	0.357	1	0	calcium/calmodulin-dependent_protein_kinase_type_II_subunit_alpha-like
LOC121410067	0.112672	-0.485207	0.423	0.42	1	0	ectopic_P_granules_protein_5_homolog
LOC121424943	0.11942	-0.362219	0.552	0.459	1	0	G_protein-coupled_receptor_kinase_5-like
LOC121416464	0.121549	-0.393227	0.272	0.285	1	0	cytochrome_P450_2C15-like
LOC121409065	0.136841	-0.400171	0.371	0.374	1	0	calcium-transporting_ATPase_sarcoplasmic/endoplasmic_reticulum_type-like
LOC121429816	0.137618	-0.33403	0.356	0.361	1	0	ras-related_protein_Rac1-like
LOC121426551	0.141115	-0.277256	0.286	0.3	1	0	advillin-like
LOC121423225	0.144982	-0.279077	0.547	0.466	1	0	putative_RNA-binding_protein_Luc7-like_2
LOC121417135	0.153179	-0.341543	0.499	0.472	1	0	proline-rich_transmembrane_protein_1-like
LOC121429984	0.164163	-0.447093	0.618	0.554	1	0	lysosome-associated_membrane_glycoprotein_1-like
LOC121407044	0.1677	-0.322894	0.316	0.322	1	0	IST1_homolog
LOC121418773	0.175867	-0.396542	0.334	0.29	1	0	fasciculation_and_elongation_protein_zeta-2-like
LOC121410373	0.184389	-0.404828	0.508	0.418	1	0	CDC42_small_effector_protein_2-like
LOC121429604	0.192553	-0.364605	0.273	0.279	1	0	mid1-interacting_protein_1A-like
LOC121423580	0.198517	-0.268779	0.343	0.299	1	0	NPC_intracellular_cholesterol_transporter_1-like
LOC121427221	0.202419	-0.400951	0.264	0.271	1	0	serine/arginine_repetitive_matrix_protein_1-like
LOC121405722	0.211097	-0.341904	0.371	0.362	1	0	src_substrate_cortactin-like
LOC121428511	0.222386	-0.394113	0.52	0.485	1	0	cdc42-interacting_protein_4-like
LOC121405859	0.224075	-0.424283	0.712	0.59	1	0	uncharacterized_LOC121405859
LOC121422938	0.227807	-0.320319	0.27	0.237	1	0	leukocyte_receptor_cluster_member_8_homolog
LOC121429222	0.246791	-0.656079	0.785	0.724	1	0	uncharacterized_LOC121429222
LOC121426187	0.252626	-0.538718	0.58	0.5	1	0	uncharacterized_LOC121426187
LOC121410494	0.258717	-0.331126	0.269	0.279	1	0	SLIT-ROBO_Rho_GTPase-activating_protein_1-like
LOC121422288	0.268976	-0.453873	0.418	0.399	1	0	fatty_acid_synthase-like
LOC121409191	0.278386	-0.300174	0.653	0.575	1	0	flotillin-2a-like
LOC121432078	0.29206	-1.33575	0.326	0.304	1	0	titin-like
LOC121422311	0.299615	-0.338763	0.382	0.365	1	0	casein_kinase_I-like
LOC121417195	0.313484	-0.27589	0.308	0.272	1	0	dihydropyrimidinase-like
LOC121418429	0.328738	-0.32965	0.254	0.26	1	0	mitogen-activated_protein_kinase_kinase_kinase_kinase_5-like
LOC121430744	0.335802	-0.280181	0.457	0.435	1	0	ras-related_protein_Rab-10-like
LOC121431144	0.346424	-0.348863	0.622	0.537	1	0	syndecan-like
LOC121424951	0.347433	-0.746322	0.552	0.499	1	0	uncharacterized_LOC121424951
LOC121415962	0.350433	-0.356228	0.411	0.395	1	0	endophilin-A3-like
LOC121406043	0.365727	-0.411349	0.312	0.306	1	0	oleosin_GRP-17-like
LOC121420112	0.392726	-0.373228	0.323	0.318	1	0	uncharacterized_LOC121420112
LOC121409142	0.40223	-0.315542	0.265	0.272	1	0	beta-adrenergic_receptor_kinase_2-like
LOC121408832	0.404317	-0.31266	0.367	0.321	1	0	rho_GTPase-activating_protein_26-like
LOC121415848	0.406457	-0.291761	0.633	0.56	1	0	adenylyl_cyclase-associated_protein_1-like
LOC121428652	0.426551	-0.31729	0.574	0.519	1	0	flotillin-1-like
LOC121418189	0.428493	-0.299441	0.418	0.402	1	0	peroxiredoxin-5,_mitochondrial-like
LOC121428551	0.44897	-0.392947	0.376	0.332	1	0	myomegalin-like
LOC121419174	0.479797	-0.298606	0.387	0.351	1	0	RNA-binding_protein_25-like
LOC121422185	0.486355	-0.288324	0.367	0.358	1	0	growth_factor_receptor-bound_protein_2-like
LOC121410477	0.514383	-0.578949	0.265	0.261	1	0	uncharacterized_LOC121410477
LOC121409331	0.514686	-0.333202	0.269	0.267	1	0	synergin_gamma-like
LOC121428153	0.520319	-0.278597	0.371	0.363	1	0	trichohyalin-like
LOC121415611	0.521481	-0.276188	0.274	0.268	1	0	sorting_nexin-2-like
LOC121413919	0.548568	-0.441891	0.457	0.42	1	0	protein_held_out_wings-like
LOC121410553	0.577116	-0.32755	0.32	0.311	1	0	tax1-binding_protein_1_homolog
LOC121427392	0.59539	-0.261171	0.332	0.321	1	0	tumor_protein_D52-like
LOC121408658	0.595619	-0.334014	0.278	0.277	1	0	ubiquitin_carboxyl-terminal_hydrolase_32-like
LOC121421532	0.598387	-0.368473	0.422	0.404	1	0	uncharacterized_LOC121421532
LOC121430553	0.601786	-0.305609	0.288	0.285	1	0	neurocalcin_homolog
LOC121430669	0.602739	-0.377794	0.263	0.24	1	0	probable_ATP-dependent_RNA_helicase_DDX60
LOC121408977	0.604146	-0.320211	0.277	0.278	1	0	kinase_suppressor_of_Ras_2-like
LOC121422598	0.611254	-0.303102	0.505	0.465	1	0	ras-related_protein_Rac1
LOC121410870	0.638806	-0.993978	0.533	0.469	1	0	procathepsin_L-like
LOC121418695	0.64176	-0.329496	0.528	0.466	1	0	calpain-A-like
LOC121413617	0.656561	-0.315516	0.252	0.254	1	0	uncharacterized_LOC121413617
LOC121431681	0.659875	-0.261216	0.489	0.459	1	0	TNFAIP3-interacting_protein_1-like
LOC121413767	0.662114	-0.25917	0.286	0.281	1	0	sterol_regulatory_element-binding_protein_1-like
LOC121411575	0.682724	-0.313994	0.25	0.23	1	0	protein_DD3-3-like
LOC121410020	0.690418	-0.369265	0.589	0.519	1	0	S-adenosylmethionine_sensor_upstream_of_mTORC1-like
LOC121412403	0.694085	-0.291634	0.326	0.3	1	0	extracellular_matrix_protein_3
LOC121427722	0.695711	-0.281796	0.255	0.237	1	0	ski_oncogene-like
LOC121415455	0.707065	-0.332421	0.274	0.249	1	0	tetraspanin-36-like
LOC121418709	0.708209	-0.277675	0.537	0.479	1	0	calcineurin_subunit_B_type_2
LOC121425408	0.732714	-0.270611	0.254	0.249	1	0	myoferlin-like
LOC121416219	0.737028	-0.331343	0.3	0.277	1	0	proprotein_convertase_subtilisin/kexin_type_5-like
LOC121430748	0.742893	-0.334251	0.308	0.282	1	0	focal_adhesion_kinase_1-like
LOC121424857	0.746847	-0.270273	0.256	0.239	1	0	poly(U)-binding-splicing_factor_PUF60-like
LOC121420114	0.750175	-0.462319	0.358	0.333	1	0	amyloid-like_protein_1
LOC121421223	0.761504	-0.387751	0.286	0.264	1	0	uncharacterized_LOC121421223
LOC121424573	0.767657	-0.31527	0.358	0.332	1	0	dual_specificity_protein_phosphatase_CDC14AB-like
LOC121429693	0.795112	-0.397035	0.299	0.277	1	0	uncharacterized_LOC121429693
LOC121431956	0.798615	-0.384241	0.618	0.529	1	0	uncharacterized_LOC121431956
LOC121418918	0.802027	-0.259575	0.712	0.58	1	0	ras-related_protein_ORAB-1
LOC121430068	0.821448	-0.370827	0.397	0.37	1	0	U2_snRNP-associated_SURP_motif-containing_protein-like
LOC121406169	0.82393	-0.290282	0.263	0.25	1	0	zinc_finger_C3H1_domain-containing_protein-like
LOC121418303	0.85254	-0.308153	0.257	0.251	1	0	kinesin-like_protein_KIF26B
LOC121418883	0.880261	-0.433156	0.53	0.458	1	0	spectrin_beta_chain,_non-erythrocytic_1-like
LOC121415894	0.884667	-0.311779	0.533	0.469	1	0	polyubiquitin-C-like
LOC121410256	0.901398	-0.670088	0.457	0.399	1	0	rho-related_protein_racA-like
LOC121408796	0.904566	-0.251358	0.481	0.438	1	0	lissencephaly-1_homolog
LOC121408474	0.914319	-0.327589	0.66	0.554	1	0	RNA-binding_protein_Musashi_homolog_2-like
LOC121418138	0.919605	-0.39526	0.27	0.251	1	0	NF-kappa-B_inhibitor_alpha-like
LOC121409225	0.93387	-0.354818	0.389	0.358	1	0	syntaxin-like
LOC121410221	0.939806	-0.271358	0.263	0.25	1	0	V-type_proton_ATPase_subunit_S1-like
LOC121418611	0.94116	-0.278721	0.374	0.345	1	0	serine/threonine-protein_phosphatase_2A_56_kDa_regulatory_subunit_delta_isoform-like
LOC121428463	0.944792	-0.290029	0.354	0.337	1	0	ras_GTPase-activating_protein_nGAP-like
LOC121405875	0.957404	-0.336068	0.424	0.389	1	0	F-actin-monooxygenase_MICAL3-like
LOC121423991	0.961945	-0.454796	0.502	0.439	1	0	next_to_BRCA1_gene_1_protein-like
LOC121431763	0.974961	-0.274657	0.361	0.334	1	0	tetraspanin-5-like
LOC121408430	0.975336	-0.279142	0.259	0.251	1	0	E3_ubiquitin-protein_ligase_HERC2-like
LOC121419347	0.979812	-0.280101	0.386	0.36	1	0	V-type_proton_ATPase_subunit_D-like
LOC121429458	1.34e-268	3.05827	0.777	0.071	2.56e-264	1	scavenger_receptor_cysteine-rich_domain-containing_group_B_protein-like
LOC121431979	7.37e-255	3.42868	0.985	0.223	1.41e-250	1	cell_wall_protein_IFF6-like
LOC121419956	1.11e-251	1.58579	0.578	0.024	2.11e-247	1	uncharacterized_LOC121419956
LOC121423010	5.58e-245	2.09797	0.69	0.054	1.06e-240	1	deleted_in_malignant_brain_tumors_1_protein-like
LOC121428865	4.61e-242	2.04738	0.654	0.044	8.81e-238	1	cadherin_EGF_LAG_seven-pass_G-type_receptor_3-like
LOC121418839	6.27e-235	2.02396	0.759	0.078	1.2e-230	1	sodium-coupled_monocarboxylate_transporter_1-like
LOC121417067	6.97e-221	1.18623	0.5	0.019	1.33e-216	1	uncharacterized_LOC121417067
LOC121408810	6.86e-220	2.27261	0.867	0.144	1.31e-215	1	glutathione_S-transferase_theta-1-like
LOC121430393	2.35e-213	1.54934	0.675	0.062	4.5e-209	1	transcription_factor_Sox-21-B-like
LOC121426852	1.06e-212	1.59182	0.69	0.067	2.03e-208	1	uncharacterized_LOC121426852
LOC121420009	3.63e-212	1.33593	0.497	0.021	6.94e-208	1	uncharacterized_LOC121420009
LOC121417155	3.92e-211	2.00342	0.858	0.133	7.49e-207	1	glycine_N-methyltransferase-like
LOC121415367	5.57e-210	4.70955	0.979	0.359	1.06e-205	1	arylsulfatase-like
LOC121431319	1.13e-209	1.58264	0.711	0.073	2.16e-205	1	venom_phosphodiesterase_2-like
LOC121424736	5.73e-207	1.81861	0.545	0.034	1.09e-202	1	exogastrula-inducing_polypeptide-like
LOC121430133	7.34e-194	1.7284	0.765	0.106	1.4e-189	1	transcription_factor_Sox-2-like
LOC121417027	2.24e-193	3.53426	0.849	0.196	4.28e-189	1	uncharacterized_LOC121417027
LOC121405789	9.18e-193	2.15525	0.958	0.215	1.75e-188	1	uncharacterized_LOC121405789
LOC121423180	2.46e-190	1.05489	0.485	0.025	4.7e-186	1	fibropellin-1
LOC121427656	1.33e-186	0.938557	0.392	0.01	2.53e-182	1	apolipoprotein_D-like
LOC121422505	5.07e-182	2.5763	0.979	0.35	9.68e-178	1	uncharacterized_LOC121422505
LOC121428823	8.3e-176	2.08568	0.657	0.081	1.59e-171	1	uncharacterized_LOC121428823
LOC121418427	4.67e-172	1.60314	0.506	0.038	8.91e-168	1	UPF0394_inner_membrane_protein_YeeE-like
LOC121411860	1.08e-171	1.4222	0.705	0.097	2.07e-167	1	caveolin-3-like
LOC121411362	1.56e-170	1.12793	0.578	0.055	2.99e-166	1	vicilin-like_seed_storage_protein_At2g18540
LOC121419062	2.51e-170	1.02258	0.524	0.042	4.79e-166	1	protein_SPEC3-like
LOC121410437	3.56e-162	0.879404	0.367	0.013	6.8e-158	1	metalloproteinase_inhibitor_1-like
LOC121410515	2.46e-161	1.1345	0.512	0.044	4.69e-157	1	uncharacterized_LOC121410515
LOC121423431	3.93e-161	1.37704	0.572	0.062	7.52e-157	1	aldehyde_dehydrogenase,_mitochondrial-like
LOC121431877	5.2e-160	1.13888	0.44	0.027	9.93e-156	1	rhodopsin,_GQ-coupled-like
LOC121429712	6.64e-160	1.50513	0.413	0.023	1.27e-155	1	uncharacterized_LOC121429712
LOC121431701	1.06e-157	2.66882	0.886	0.275	2.02e-153	1	S-crystallin_SL11-like
LOC121418469	8.88e-153	1.3563	0.548	0.058	1.7e-148	1	arginine_kinase-like
LOC121427214	1.22e-152	1.12523	0.455	0.034	2.33e-148	1	uncharacterized_LOC121427214
LOC121415639	6.41e-150	1.50125	0.714	0.13	1.22e-145	1	glutamate_receptor_1-like
LOC121419063	2.82e-149	1.70497	0.557	0.067	5.39e-145	1	protein_SPEC3-like
LOC121429773	4.31e-148	0.976009	0.295	0.006	8.24e-144	1	phosphatidylinositol_transfer_protein_alpha_isoform-like
LOC121422072	9.18e-148	1.29379	0.56	0.067	1.75e-143	1	mucin-17-like
LOC121413337	2e-147	1.81075	0.545	0.063	3.81e-143	1	tubulin_alpha-1_chain-like
LOC121429806	1.42e-145	0.935756	0.422	0.03	2.71e-141	1	neuronal_acetylcholine_receptor_subunit_alpha-3-like
LOC121410635	1.2e-144	1.27582	0.464	0.041	2.29e-140	1	ras-like_protein_rasD
LOC121430315	1.5e-144	0.694611	0.304	0.008	2.86e-140	1	methyltransferase-like_protein_27
LOC121423542	1.21e-143	0.762457	0.377	0.02	2.3e-139	1	uncharacterized_LOC121423542
LOC121427612	2.02e-141	2.1532	0.867	0.25	3.85e-137	1	apolipoprotein_D-like
LOC121418701	2.21e-141	1.87093	0.97	0.369	4.22e-137	1	neuroblast_differentiation-associated_protein_AHNAK-like
LOC121428864	9.22e-141	1.3084	0.617	0.092	1.76e-136	1	sodium-_and_chloride-dependent_neutral_and_basic_amino_acid_transporter_B(0+)-like
LOC121405839	5.57e-139	1.21393	0.563	0.072	1.06e-134	1	late_histone_H2B.L4-like
LOC121430310	5.49e-136	1.69052	0.599	0.088	1.05e-131	1	delta-like_protein_1
LOC121407002	1.39e-135	1.10962	0.431	0.036	2.65e-131	1	amine_oxidase_[flavin-containing]_B-like
LOC121422500	1.48e-135	0.958731	0.506	0.055	2.83e-131	1	uncharacterized_LOC121422500
LOC121416240	1.61e-134	1.02999	0.461	0.044	3.07e-130	1	sodium-dependent_phosphate_transport_protein_2B-like
LOC121425111	2.72e-134	0.866649	0.37	0.023	5.19e-130	1	uncharacterized_LOC121425111
LOC121429044	5.99e-134	1.0603	0.485	0.052	1.14e-129	1	uncharacterized_LOC121429044
LOC121430857	8.22e-134	0.747284	0.337	0.017	1.57e-129	1	uncharacterized_LOC121430857
LOC121415635	2.26e-132	1.08858	0.434	0.039	4.32e-128	1	glutamate_receptor_1-like
LOC121424828	2.6e-132	1.87794	0.633	0.106	4.97e-128	1	uncharacterized_LOC121424828
LOC121409015	7.8e-131	1.08014	0.386	0.028	1.49e-126	1	uncharacterized_LOC121409015
LOC121431007	1.33e-130	0.744972	0.34	0.018	2.54e-126	1	uncharacterized_LOC121431007
LOC121408793	4.08e-130	0.9594	0.319	0.015	7.78e-126	1	thyroid_peroxidase-like
LOC121427425	5.33e-130	0.68555	0.34	0.018	1.02e-125	1	E3_ubiquitin-protein_ligase_MARCHF1-like
LOC121414239	5.86e-129	0.922929	0.373	0.025	1.12e-124	1	monocarboxylate_transporter_12-like
LOC121422471	4.67e-128	0.852334	0.328	0.017	8.93e-124	1	uncharacterized_LOC121422471
LOC121428605	2.31e-127	0.786825	0.346	0.021	4.41e-123	1
LOC121429195	4.42e-127	1.11078	0.533	0.071	8.44e-123	1	uncharacterized_LOC121429195
LOC121429436	1.04e-126	0.655638	0.304	0.013	1.98e-122	1	14-3-3_protein_gamma-like
LOC121421049	8.34e-125	0.966512	0.307	0.014	1.59e-120	1	solute_carrier_organic_anion_transporter_family_member_2A1-like
LOC121428758	3.91e-124	1.72754	0.937	0.486	7.48e-120	1	peroxiredoxin-6-like
LOC121413394	1.09e-123	1.28628	0.334	0.02	2.08e-119	1	tubulin_alpha-1_chain-like
LOC121429045	1.8e-123	2.53599	0.44	0.049	3.44e-119	1	uncharacterized_LOC121429045
LOC121407940	2.59e-123	0.668749	0.313	0.016	4.95e-119	1	growth_factor_receptor-bound_protein_2-like
LOC121423676	1.51e-122	0.905194	0.367	0.027	2.89e-118	1	PR_domain_zinc_finger_protein_14-like
LOC121419025	3.37e-122	0.916823	0.476	0.055	6.44e-118	1	calmodulin-A-like
LOC121417009	7.01e-122	0.653102	0.283	0.011	1.34e-117	1	crk-like_protein
LOC121414183	5.21e-121	0.847043	0.383	0.032	9.96e-117	1	uncharacterized_LOC121414183
LOC121427617	1.96e-119	0.810364	0.389	0.033	3.74e-115	1	uncharacterized_LOC121427617
LOC121426703	1.01e-118	1.04146	0.47	0.056	1.93e-114	1	growth/differentiation_factor_8-like
LOC121423125	4.54e-117	0.605068	0.295	0.014	8.68e-113	1	uncharacterized_LOC121423125
LOC121420949	2.96e-116	1.35319	0.358	0.029	5.66e-112	1	uncharacterized_LOC121420949
LOC121418822	3.47e-115	1.09561	0.377	0.034	6.62e-111	1	calcium-binding_protein_LPS1-alpha-like
LOC121418079	5.12e-115	0.670349	0.259	0.009	9.78e-111	1	adenosine_receptor_A3-like
LOC121424023	7.57e-114	0.909974	0.497	0.067	1.45e-109	1	sodium-_and_chloride-dependent_glycine_transporter_1-like
LOC121424109	1.55e-111	1.26762	0.581	0.103	2.97e-107	1	indole-3-acetic_acid-amido_synthetase_GH3.17-like
LOC121431427	4.25e-108	1.0308	0.515	0.079	8.11e-104	1	uncharacterized_LOC121431427
LOC121415634	6.38e-108	1.15108	0.729	0.189	1.22e-103	1	glutamate_receptor_3-like
LOC121422208	7.4e-107	0.867466	0.331	0.027	1.41e-102	1	uncharacterized_LOC121422208
LOC121414524	3.57e-106	1.88409	0.786	0.274	6.81e-102	1	tubulin_alpha-1_chain-like
LOC121425728	4.32e-106	0.541546	0.253	0.01	8.24e-102	1	protein_glass-like
LOC121424245	8.04e-106	0.783608	0.434	0.055	1.54e-101	1	nmrA-like_family_domain-containing_protein_1
LOC121421075	1.69e-105	1.18193	0.28	0.016	3.23e-101	1	uncharacterized_LOC121421075
LOC121418823	5e-105	2.1292	0.452	0.068	9.55e-101	1	calmodulin-A-like
LOC121432127	1.5e-104	1.09753	0.307	0.022	2.87e-100	1	uncharacterized_LOC121432127
LOC121414207	1.73e-104	0.701057	0.313	0.023	3.31e-100	1	uncharacterized_LOC121414207
LOC121430805	2.03e-104	0.731562	0.361	0.034	3.88e-100	1	probable_thiopurine_S-methyltransferase
LOC121417370	2.81e-104	0.491485	0.25	0.01	5.36e-100	1	cornifelin-like
LOC121430927	1.58e-103	0.703589	0.307	0.022	3.01e-99	1	retinol_dehydrogenase_8-like
LOC121415369	1.83e-103	0.92455	0.401	0.046	3.5e-99	1	sodium_channel_protein_1_brain-like
LOC121432042	2.7e-103	0.583358	0.277	0.016	5.16e-99	1	retinol_dehydrogenase_11-like
LOC121421666	5.21e-100	1.01878	0.515	0.085	9.94e-96	1	tetraspanin-18-like
LOC121421797	2.18e-99	0.938778	0.256	0.013	4.16e-95	1	uncharacterized_LOC121421797
LOC121414528	3.16e-99	1.43015	0.512	0.095	6.03e-95	1	tubulin_alpha-1_chain
LOC121411213	5.55e-99	0.732528	0.422	0.055	1.06e-94	1	LHFPL_tetraspan_subfamily_member_3_protein-like
LOC121425000	3.34e-98	0.86997	0.392	0.047	6.38e-94	1	fibrocystin-L-like
LOC121420320	3.61e-98	0.679264	0.277	0.017	6.89e-94	1	uncharacterized_LOC121420320
LOC121423995	4.55e-98	0.631853	0.286	0.02	8.7e-94	1	gamma-butyrobetaine_dioxygenase-like
LOC121422456	2.79e-97	1.85471	0.587	0.132	5.32e-93	1	uncharacterized_LOC121422456
LOC121410399	3.09e-96	1.16393	0.5	0.088	5.89e-92	1	uncharacterized_LOC121410399
LOC121420064	3.3e-95	0.873385	0.539	0.101	6.3e-91	1	uncharacterized_LOC121420064
LOC121421684	4.36e-95	0.905733	0.38	0.046	8.32e-91	1	low-density_lipoprotein_receptor-related_protein_4-like
LOC121407465	9e-94	0.819288	0.367	0.043	1.72e-89	1	uncharacterized_protein_C20orf85-like
LOC121418610	9.51e-94	0.770547	0.268	0.018	1.82e-89	1	uncharacterized_LOC121418610
LOC121415638	1.74e-92	0.720983	0.277	0.02	3.32e-88	1	glutamate_receptor_1-like
LOC121406545	2.67e-91	0.470726	0.265	0.017	5.1e-87	1	dehydrogenase/reductase_SDR_family_member_11-like
LOC121430745	5.44e-91	1.4472	0.886	0.428	1.04e-86	1	annexin_A13-like
LOC121415997	3.11e-89	0.718515	0.262	0.018	5.94e-85	1	forkhead_box_protein_B1-like
LOC121431367	1.04e-88	0.57186	0.289	0.024	1.99e-84	1	sodium-coupled_monocarboxylate_transporter_1-like
LOC121431880	1.29e-88	0.589364	0.286	0.024	2.45e-84	1	uncharacterized_LOC121431880
LOC121427594	8.36e-87	0.603746	0.343	0.039	1.6e-82	1	uncharacterized_LOC121427594
LOC121413365	1.14e-86	0.849296	0.373	0.05	2.18e-82	1	uncharacterized_LOC121413365
LOC121425215	8.31e-86	0.878953	0.554	0.12	1.59e-81	1	myosin_light_chain_kinase,_smooth_muscle-like
LOC121415834	8.64e-86	0.797477	0.578	0.125	1.65e-81	1	dual_oxidase_maturation_factor_1-like
LOC121426520	1.47e-85	0.695452	0.401	0.057	2.81e-81	1	uncharacterized_LOC121426520
LOC121429585	3.18e-85	0.512367	0.286	0.025	6.07e-81	1	acetylcholinesterase-like
LOC121410609	1.04e-84	0.868997	0.572	0.123	2e-80	1	uncharacterized_LOC121410609
LOC121407827	1.54e-84	1.11825	0.331	0.039	2.94e-80	1	tubulin_beta_chain
LOC121423603	2.12e-84	0.989646	0.816	0.281	4.06e-80	1	lateral_signaling_target_protein_2_homolog
LOC121408360	6.7e-84	0.51591	0.301	0.03	1.28e-79	1	putative_defense_protein_3
LOC121409326	1.21e-83	0.580534	0.346	0.042	2.32e-79	1	LIM/homeobox_protein_Lhx5-like
LOC121410985	1.79e-82	0.600884	0.256	0.02	3.42e-78	1	protein_Wnt-7b-like
LOC121411369	8.19e-82	0.550112	0.268	0.023	1.56e-77	1	uncharacterized_LOC121411369
LOC121414129	1.2e-81	0.618055	0.271	0.024	2.29e-77	1	RNA_polymerase_II_degradation_factor_1-like
LOC121421553	1.91e-79	0.769578	1	0.994	3.64e-75	1	soma_ferritin-like
LOC121409087	2.12e-79	1.12207	0.259	0.022	4.05e-75	1	uncharacterized_LOC121409087
LOC121408183	1.74e-78	0.63505	0.301	0.033	3.32e-74	1	fibropellin-1-like
LOC121429487	4.19e-78	0.985701	0.47	0.094	8e-74	1	parkin_coregulated_gene_protein_homolog
LOC121430531	5.16e-78	0.51607	0.316	0.037	9.85e-74	1	uncharacterized_LOC121430531
LOC121427508	6.04e-78	2.66595	0.575	0.164	1.15e-73	1	uncharacterized_LOC121427508
LOC121428244	5.21e-77	0.549956	0.322	0.04	9.95e-73	1	solute_carrier_family_46_member_3-like
LOC121423913	8.42e-77	1.00931	0.358	0.054	1.61e-72	1	growth/differentiation_factor_8-like
LOC121423828	2.23e-76	0.668016	0.328	0.044	4.25e-72	1	histamine_N-methyltransferase_B-like
LOC121428220	5.54e-76	0.713379	0.419	0.073	1.06e-71	1	phospholipid_scramblase_1-like
LOC121426221	1.75e-75	0.616005	0.268	0.026	3.33e-71	1	proto-oncogene_Wnt-3-like
LOC121409742	2.72e-74	3.28536	0.482	0.122	5.2e-70	1	uncharacterized_LOC121409742
LOC121405748	9.96e-74	0.67566	0.301	0.036	1.9e-69	1	outer_dense_fiber_protein_3-like
LOC121412744	9.71e-73	0.90999	0.401	0.074	1.85e-68	1	cystatin-B-like
LOC121420439	3.62e-72	0.50589	0.271	0.028	6.91e-68	1	cytochrome_P450_3A4-like
LOC121424567	2.48e-71	0.872329	0.328	0.047	4.74e-67	1	uncharacterized_LOC121424567
LOC121430257	1.93e-70	0.559368	0.268	0.03	3.68e-66	1	uncharacterized_LOC121430257
LOC121413372	4.79e-70	0.776041	0.295	0.038	9.15e-66	1	uncharacterized_LOC121413372
LOC121418296	4.49e-69	0.891	0.437	0.091	8.57e-65	1	radial_spoke_head_protein_4_homolog_A-like
LOC121428601	1.65e-68	0.663792	0.419	0.084	3.15e-64	1	serine/threonine_kinase-like_domain-containing_protein_STKLD1
LOC121416829	2.29e-68	0.488656	0.259	0.027	4.37e-64	1	uncharacterized_LOC121416829
LOC121411587	4.17e-66	0.976137	0.783	0.322	7.96e-62	1	filamin-A-like
LOC121411456	5.99e-66	0.573736	0.262	0.03	1.14e-61	1	uncharacterized_LOC121411456
LOC121414430	4.47e-65	0.604065	0.31	0.045	8.54e-61	1	uncharacterized_LOC121414430
LOC121426169	9.08e-65	0.487874	0.509	0.116	1.73e-60	1	uncharacterized_LOC121426169
LOC121413366	1.04e-64	0.880169	0.389	0.075	1.98e-60	1	uncharacterized_LOC121413366
LOC446193	1.94e-64	0.61318	0.277	0.036	3.71e-60	1	hyalin
LOC121428943	1.15e-63	0.901631	0.437	0.095	2.19e-59	1	heme-binding_protein_2-like
LOC121431621	1.9e-63	-2.46105	0.298	0.699	3.62e-59	1	SPARC-like
LOC121423883	3.88e-63	0.80583	0.491	0.128	7.4e-59	1	muscle-specific_protein_20-like
LOC121418567	6.67e-63	0.999638	0.861	0.477	1.27e-58	1	uncharacterized_LOC121418567
LOC121407376	9.98e-63	0.528307	0.28	0.038	1.91e-58	1	mucin-17-like
LOC121414516	1.13e-62	0.922618	0.343	0.063	2.16e-58	1	tubulin_alpha-1_chain-like
LOC121410997	1.29e-62	0.681318	0.31	0.049	2.46e-58	1	dynein_regulatory_complex_protein_11-like
LOC121426250	2.17e-62	-2.19884	0.301	0.697	4.14e-58	1	zinc_metalloproteinase_nas-39-like
LOC121408578	2.57e-62	0.538469	0.256	0.031	4.91e-58	1	uncharacterized_LOC121408578
LOC121423558	8.96e-62	1.11612	0.846	0.451	1.71e-57	1	uncharacterized_LOC121423558
LOC121431144	1.09e-61	1.02603	0.892	0.517	2.09e-57	1	syndecan-like
LOC121410537	1.9e-61	0.95086	0.346	0.065	3.62e-57	1	meiosis_expressed_gene_1_protein_homolog
LOC121432070	2.54e-61	0.795615	0.557	0.168	4.86e-57	1	polycystic_kidney_disease_2-like_1_protein
gene-DR311-mgr01	3.31e-61	0.754593	1	1	6.32e-57	1
LOC121426045	9.18e-61	0.433221	0.277	0.038	1.75e-56	1
LOC121417901	9.94e-61	0.639526	0.274	0.038	1.9e-56	1	outer_dynein_arm-docking_complex_subunit_2-like
LOC121411577	1.85e-60	0.720949	0.331	0.058	3.53e-56	1	uncharacterized_LOC121411577
LOC121418316	3.27e-60	0.599313	0.256	0.033	6.25e-56	1	D-aspartate_oxidase-like
LOC121428930	9.6e-60	0.643437	0.301	0.047	1.83e-55	1	heme-binding_protein_2-like
LOC121410000	1.09e-59	0.86822	0.389	0.082	2.08e-55	1	protein_ATP6V1FNB-like
LOC121415187	1.9e-59	0.810371	0.693	0.26	3.62e-55	1	histone-lysine_N-methyltransferase_ASH1L-like
LOC121418961	2.47e-59	0.580251	0.346	0.065	4.72e-55	1	synaptotagmin-14-like
LOC121420429	4.74e-59	0.649288	0.407	0.092	9.06e-55	1	cell_adhesion_molecule-related/down-regulated_by_oncogenes-like
LOC121406013	6.37e-59	0.56131	0.259	0.035	1.22e-54	1	thialysine_N-epsilon-acetyltransferase-like
LOC121423493	6.42e-59	0.682391	0.349	0.065	1.23e-54	1	uncharacterized_LOC121423493
LOC121415911	1e-58	0.676206	0.44	0.107	1.91e-54	1	uncharacterized_LOC121415911
LOC121409246	2.38e-58	0.730469	0.383	0.082	4.54e-54	1	transcription_intermediary_factor_1-alpha-like
LOC121431881	2.71e-58	0.513892	0.283	0.042	5.18e-54	1	uncharacterized_LOC121431881
LOC121420130	3e-58	0.507603	0.304	0.048	5.72e-54	1	fibropellin-1-like
LOC121421748	6.96e-58	0.302435	0.256	0.033	1.33e-53	1	low-density_lipoprotein_receptor-related_protein_4-like
LOC121417258	9.05e-58	0.862484	0.56	0.184	1.73e-53	1	epidermal_growth_factor_receptor_kinase_substrate_8-like_protein_2
LOC121413371	1.78e-57	0.640583	0.386	0.081	3.4e-53	1	uncharacterized_LOC121413371
LOC121411316	7.44e-57	0.896847	0.726	0.316	1.42e-52	1	transketolase-like
LOC121430708	7.86e-57	0.861758	0.349	0.069	1.5e-52	1	tektin-B1-like
LOC121430517	8.86e-57	0.810693	0.587	0.198	1.69e-52	1	microtubule-actin_cross-linking_factor_1-like
LOC121419201	2.5e-56	0.723181	0.392	0.09	4.77e-52	1	mitochondrial_basic_amino_acids_transporter-like
LOC121418033	1.01e-55	0.514089	0.346	0.066	1.92e-51	1	cellular_retinoic_acid-binding_protein_1-like
LOC121407392	1.84e-55	0.832477	0.608	0.22	3.51e-51	1	subtilisin-chymotrypsin_inhibitor-2B-like
LOC121407799	7.87e-55	0.774596	0.47	0.135	1.5e-50	1	glucose-6-phosphate_isomerase-like
LOC121429627	2.97e-54	-1.99116	0.235	0.64	5.67e-50	1	collagen_alpha-5(IV)_chain-like
LOC121418185	4.01e-54	-1.93862	0.407	0.703	7.66e-50	1	cell_surface_glycoprotein_1-like
LOC121409899	7e-54	0.835274	0.422	0.107	1.34e-49	1	disheveled-associated_activator_of_morphogenesis_1-A-like
LOC121409673	3.09e-53	0.672423	0.325	0.063	5.9e-49	1	kinesin-like_protein_KIF28P
LOC121423610	3.31e-53	0.615274	0.518	0.156	6.32e-49	1	lateral_signaling_target_protein_2_homolog
LOC121418505	2.4e-52	0.855431	0.268	0.044	4.59e-48	1	calmodulin-like
LOC121429185	5.67e-52	-2.11013	0.34	0.672	1.08e-47	1	collagen_alpha-1(V)_chain-like
LOC121410715	7.56e-52	0.884534	0.723	0.339	1.44e-47	1	calcium-binding_protein_P-like
LOC121431712	8.21e-52	0.739564	0.319	0.064	1.57e-47	1	uncharacterized_LOC121431712
LOC121410381	1.25e-51	0.623586	0.557	0.183	2.39e-47	1	LIM_and_SH3_domain_protein_1-like
LOC121426050	7.76e-51	0.72195	0.617	0.223	1.48e-46	1	serine/threonine-protein_kinase_17A-like
LOC121428541	8.89e-51	0.781725	0.542	0.182	1.7e-46	1	heme-binding_protein_2-like
LOC121423749	6.23e-50	0.739213	0.497	0.159	1.19e-45	1	muscle-specific_protein_20-like
LOC121418695	1.1e-49	0.881285	0.822	0.44	2.09e-45	1	calpain-A-like
LOC121427404	1.18e-49	0.750222	0.319	0.068	2.26e-45	1	histone-lysine_N-methyltransferase_MECOM-like
LOC121417121	3.99e-49	0.470277	0.253	0.041	7.61e-45	1
LOC121417461	6.56e-49	0.364187	0.274	0.047	1.25e-44	1	histidine-rich_glycoprotein-like
LOC121407469	8.03e-49	0.420808	0.28	0.049	1.53e-44	1	uncharacterized_LOC121407469
LOC121421314	1.46e-48	0.626433	0.419	0.112	2.8e-44	1	fatty_acyl-CoA_reductase_1-like
LOC121431868	6.38e-48	0.532292	0.331	0.074	1.22e-43	1	uncharacterized_LOC121431868
LOC121419354	1.38e-47	0.642367	0.491	0.157	2.64e-43	1	nidogen-1-like
LOC121417233	2.3e-47	-3.0276	0.494	0.733	4.39e-43	1	uncharacterized_LOC121417233
LOC121410788	2.5e-47	0.4463	0.334	0.071	4.78e-43	1	uncharacterized_LOC121410788
LOC121423867	4.48e-47	0.79119	0.777	0.385	8.55e-43	1	polypyrimidine_tract-binding_protein_1-like
LOC121415161	6.71e-47	0.846859	0.958	0.674	1.28e-42	1	receptor_expression-enhancing_protein_5-like
LOC121427624	9.7e-47	0.830216	0.467	0.133	1.85e-42	1	development-specific_protein_LVN1.2-like
LOC121417421	9.83e-47	0.359647	0.256	0.043	1.88e-42	1	histidine-rich_glycoprotein-like
LOC121424255	6.36e-45	0.777904	0.364	0.095	1.22e-40	1	rho_GTPase-activating_protein_29-like
LOC121408314	2.08e-44	0.514825	0.328	0.077	3.97e-40	1	glutathione_S-transferase_omega-1-like
LOC121415566	2.14e-44	0.642407	0.617	0.247	4.08e-40	1	repulsive_guidance_molecule_A-like
LOC121417006	4.34e-44	0.657467	0.358	0.094	8.3e-40	1	ephrin-B2-like
LOC121426241	8.11e-44	0.627378	0.386	0.106	1.55e-39	1	enkurin-like
LOC121427250	1.19e-43	0.560319	0.34	0.082	2.26e-39	1	agrin-like
LOC121423875	3.2e-43	0.51565	0.343	0.084	6.11e-39	1	dynein_heavy_chain_7,_axonemal-like
LOC121427977	3.84e-43	0.437767	0.295	0.063	7.33e-39	1	uncharacterized_LOC121427977
LOC121422572	5.38e-43	0.410809	0.289	0.06	1.03e-38	1	neuronal-specific_septin-3-like
LOC121420304	6.45e-43	0.711108	0.343	0.085	1.23e-38	1	cilia-_and_flagella-associated_protein_45-like
LOC121405965	9.06e-43	0.60305	0.355	0.094	1.73e-38	1	excitatory_amino_acid_transporter-like
LOC121427884	1.34e-42	0.334467	0.404	0.105	2.56e-38	1	uncharacterized_LOC121427884
LOC121430484	1.41e-42	0.549338	0.422	0.125	2.7e-38	1	uncharacterized_LOC121430484
LOC121426533	2.19e-42	0.381748	0.295	0.063	4.18e-38	1	jasmonoyl--L-amino_acid_synthetase_JAR1-like
LOC121407892	2.6e-42	-1.72309	0.214	0.57	4.97e-38	1	peptidyl-prolyl_cis-trans_isomerase_6-like
LOC121408757	2.6e-42	0.652539	0.608	0.253	4.97e-38	1	fructose-bisphosphate_aldolase,_muscle_type-like
LOC121427514	4.48e-42	0.451588	0.277	0.057	8.55e-38	1	beta-lactamase_domain-containing_protein_2-like
LOC121430703	2.1e-41	0.538542	0.536	0.196	4.01e-37	1	otoferlin-like
LOC121407504	5.85e-41	0.460917	0.361	0.094	1.12e-36	1	uncharacterized_LOC121407504
LOC121421733	1.87e-40	0.527727	0.527	0.189	3.57e-36	1	tetraspanin-9-like
LOC121423571	3.69e-40	0.477906	0.328	0.082	7.04e-36	1
LOC121432120	5e-40	0.484046	0.259	0.052	9.55e-36	1	uncharacterized_LOC121432120
LOC121424436	2.94e-39	-1.90872	0.181	0.538	5.61e-35	1	sodium-_and_chloride-dependent_glycine_transporter_1-like
LOC121408813	2.25e-38	0.676135	0.428	0.141	4.29e-34	1	dynein_light_chain_2,_cytoplasmic-like
LOC121407004	5.2e-38	0.739041	0.666	0.316	9.94e-34	1	pyrimidodiazepine_synthase-like
LOC121426338	5.91e-38	0.49181	0.307	0.077	1.13e-33	1	outer_dynein_arm-docking_complex_subunit_4-like
LOC121422685	1.08e-37	0.629222	0.373	0.11	2.06e-33	1	72_kDa_type_IV_collagenase-like
LOC121425045	1.43e-37	0.453857	0.398	0.121	2.73e-33	1	centromere_protein_F-like
LOC121429798	1.97e-37	-1.60659	0.193	0.533	3.75e-33	1	collagen_alpha-5(IV)_chain-like
LOC121424812	2.09e-37	0.719581	0.681	0.352	3.99e-33	1	gamma-adducin-like
LOC121423635	4.14e-37	0.608987	0.569	0.238	7.9e-33	1	calcyphosin-like_protein
LOC121418551	4.48e-37	0.678728	0.364	0.108	8.57e-33	1	SPARC-related_modular_calcium-binding_protein_1-like
LOC121426420	4.49e-37	0.551395	0.367	0.109	8.57e-33	1	EF-hand_calcium-binding_domain-containing_protein_1-like
LOC121427950	1.45e-36	-2.48914	0.34	0.618	2.76e-32	1	uncharacterized_LOC121427950
LOC121413919	3.3e-36	0.568241	0.747	0.39	6.3e-32	1	protein_held_out_wings-like
LOC121431737	4.3e-36	-1.47615	0.123	0.478	8.22e-32	1	uncharacterized_LOC121431737
LOC121430557	5.6e-36	0.69832	0.443	0.155	1.07e-31	1	nucleolin_1-like
LOC121429133	7.85e-36	0.782243	0.313	0.086	1.5e-31	1	uncharacterized_LOC121429133
LOC121419318	8.79e-36	0.376214	0.271	0.061	1.68e-31	1	hepatocyte_nuclear_factor_3-beta-like
LOC121431449	1.24e-35	0.586321	0.322	0.092	2.37e-31	1	melanotransferrin-like
LOC121429282	2.06e-35	0.341628	0.283	0.069	3.93e-31	1	heparan_sulfate_2-O-sulfotransferase_1-like
LOC121407826	4.02e-35	1.00932	0.527	0.23	7.68e-31	1	tubulin_beta_chain-like
LOC121416938	5.25e-35	0.663662	0.928	0.559	1e-30	1	60S_ribosomal_protein_L12-like
LOC121419409	5.42e-35	0.523098	0.307	0.082	1.04e-30	1	radial_spoke_head_protein_9_homolog
LOC121408089	5.97e-35	0.492666	0.319	0.088	1.14e-30	1	protein_CBFA2T1-like
LOC121418336	7.15e-35	0.490775	0.283	0.071	1.37e-30	1	coiled-coil_domain-containing_protein_170-like
LOC121421513	8.68e-35	0.478153	0.822	0.453	1.66e-30	1	tetraspanin-18-like
LOC121408872	9.65e-35	0.48336	0.437	0.152	1.84e-30	1	uncharacterized_LOC121408872
LOC121407463	1.24e-34	0.668235	0.63	0.302	2.38e-30	1	uncharacterized_LOC121407463
LOC121414333	5.02e-34	0.617332	0.919	0.668	9.59e-30	1	superoxide_dismutase_[Cu-Zn]-like
LOC121405901	1.63e-33	0.502601	0.343	0.104	3.12e-29	1	retinol_dehydrogenase_8-like
LOC121407503	1.84e-33	0.381956	0.355	0.107	3.52e-29	1	uncharacterized_LOC121407503
LOC121420292	2.26e-33	0.285823	0.277	0.069	4.31e-29	1	uncharacterized_LOC121420292
LOC121430602	3.46e-33	0.348168	0.286	0.074	6.61e-29	1	uncharacterized_LOC121430602
LOC121415925	5.17e-33	0.541372	0.735	0.38	9.87e-29	1	uncharacterized_LOC121415925
LOC121409999	8.69e-33	0.548737	0.437	0.16	1.66e-28	1	trichohyalin-like
LOC121427423	1.4e-32	0.431011	0.334	0.101	2.68e-28	1	6-phosphogluconate_dehydrogenase,_decarboxylating-like
LOC121427257	5.25e-32	0.450577	0.328	0.098	1e-27	1	retinal_rod_rhodopsin-sensitive_cGMP_3',5'-cyclic_phosphodiesterase_subunit_delta-like
LOC121428155	1.53e-31	-0.520154	0.994	0.958	2.91e-27	1	eukaryotic_translation_initiation_factor_5A-1-like
LOC121409705	3.97e-31	0.354729	0.527	0.212	7.59e-27	1	peptide_methionine_sulfoxide_reductase-like
LOC121422288	5.23e-31	0.619313	0.69	0.368	9.99e-27	1	fatty_acid_synthase-like
LOC121418566	5.33e-31	0.526959	0.88	0.647	1.02e-26	1	uncharacterized_LOC121418566
LOC121413185	6.19e-31	-2.0856	0.181	0.48	1.18e-26	1
LOC121419865	6.29e-31	0.714965	0.554	0.263	1.2e-26	1	acyl-CoA_6-desaturase-like
LOC121410654	2.24e-30	0.383797	0.352	0.116	4.27e-26	1	neurexin-4-like
LOC121426239	2.34e-30	0.442455	0.331	0.106	4.47e-26	1	carbonyl_reductase_[NADPH]_1-like
LOC121428489	9.87e-30	0.635853	0.75	0.431	1.89e-25	1	nuclear_receptor_subfamily_5_group_A_member_2-like
LOC121410422	1.03e-29	0.405929	0.313	0.096	1.96e-25	1	nuclear_matrix_constituent_protein_1a-like
gene-DR311-mgr02	1.83e-29	0.357793	1	1	3.5e-25	1
LOC121427349	2.5e-29	0.345485	0.398	0.14	4.77e-25	1	cholinesterase_1-like
LOC121422410	2.53e-29	0.591915	0.955	0.78	4.84e-25	1	actin-related_protein_2/3_complex_subunit_1A-like
LOC121407707	2.97e-29	0.327384	0.253	0.067	5.68e-25	1	uncharacterized_LOC121407707
LOC121410649	3.89e-29	-1.22692	0.102	0.409	7.44e-25	1	uncharacterized_LOC121410649
LOC121421174	4.23e-29	0.343916	0.28	0.079	8.09e-25	1	uncharacterized_LOC121421174
LOC121423241	5.73e-29	0.427177	0.563	0.254	1.09e-24	1	cell_death-inducing_p53-target_protein_1_homolog
LOC121410468	6.19e-29	0.58472	0.608	0.302	1.18e-24	1	TRAF3-interacting_protein_1-like
LOC121424060	1.11e-28	0.324669	0.277	0.078	2.13e-24	1	uncharacterized_LOC121424060
LOC121417380	1.38e-28	0.421112	0.428	0.162	2.63e-24	1	plastin-3-like
LOC121424525	2.07e-28	-0.388901	1	0.972	3.95e-24	1	uncharacterized_LOC121424525
LOC121429738	2.12e-28	0.338225	0.28	0.081	4.05e-24	1	retinol_dehydrogenase_11-like
LOC121411902	3.1e-28	0.496527	0.295	0.091	5.92e-24	1	meiosis-specific_nuclear_structural_protein_1-like
LOC121431021	3.62e-28	-0.364222	1	0.995	6.91e-24	1	40S_ribosomal_protein_S12-like
LOC121430518	4.32e-28	0.360869	0.25	0.066	8.25e-24	1	microtubule-actin_cross-linking_factor_1-like
LOC121431887	5.22e-28	0.790192	0.602	0.322	9.98e-24	1	S-crystallin_SL11-like
LOC121425138	5.3e-28	0.345131	0.322	0.103	1.01e-23	1	putative_aminopeptidase_W07G4.4
LOC121423170	6.41e-28	0.465742	0.87	0.598	1.22e-23	1	CD63_antigen-like
LOC121418977	9.42e-28	0.37528	0.59	0.285	1.8e-23	1	mitogen-activated_protein_kinase-binding_protein_1-like
LOC121410965	1.36e-27	0.366043	0.304	0.094	2.6e-23	1	reelin-like
LOC121408058	1.43e-27	0.451476	0.268	0.078	2.73e-23	1	dynein_regulatory_complex_subunit_4-like
LOC121431682	1.95e-27	0.323822	0.367	0.13	3.73e-23	1	gelsolin-like_protein_2
LOC121424881	2.06e-27	-2.54299	0.428	0.624	3.94e-23	1	actin,_cytoskeletal
LOC121413184	4e-27	-2.08111	0.211	0.485	7.64e-23	1
LOC121408340	4.59e-27	-1.12736	0.723	0.838	8.76e-23	1	CCAAT/enhancer-binding_protein_alpha-like
LOC121411827	1.2e-26	0.654897	0.416	0.165	2.3e-22	1	pollen-specific_leucine-rich_repeat_extensin-like_protein_1
LOC121430804	2.5e-26	0.427185	0.313	0.104	4.77e-22	1	trichohyalin-like
LOC121427238	8.39e-26	0.294865	0.349	0.123	1.6e-21	1	N-acetylated-alpha-linked_acidic_dipeptidase_2-like
LOC121410846	1.92e-25	0.298178	0.355	0.129	3.67e-21	1	interaptin-like
LOC121415139	2.21e-25	0.269742	0.25	0.071	4.22e-21	1	uncharacterized_LOC121415139
LOC121429404	2.52e-25	0.427054	0.428	0.174	4.81e-21	1	receptor_tyrosine-protein_kinase_erbB-4-like
LOC121413924	2.76e-25	0.51478	0.325	0.115	5.26e-21	1	radial_spoke_head_protein_3_homolog
LOC121408978	6.02e-25	0.412855	0.346	0.129	1.15e-20	1	protein_unc-119_homolog_B-like
LOC121428399	1.73e-24	-1.74722	0.425	0.591	3.3e-20	1	actin_CyI,_cytoplasmic
LOC121422977	2.83e-24	0.38574	0.307	0.107	5.4e-20	1	aldo-keto_reductase_family_1_member_A1-like
LOC121406279	1.03e-23	-1.14431	0.105	0.369	1.96e-19	1	spondin-1-like
LOC121411771	1.22e-23	0.421601	0.446	0.198	2.32e-19	1	glucose-6-phosphate_1-dehydrogenase_X-like
LOC121426155	1.35e-23	0.465109	0.253	0.079	2.58e-19	1	sperm-associated_antigen_6
LOC121429030	1.7e-23	-0.910294	0.792	0.859	3.24e-19	1	immediate_early_response_gene_5-like_protein
LOC121410040	5.59e-23	0.281518	0.262	0.083	1.07e-18	1	leucine-rich_repeat-containing_protein_71-like
LOC121425408	8.19e-23	0.43815	0.473	0.222	1.56e-18	1	myoferlin-like
LOC121408326	9.81e-23	0.412899	0.383	0.158	1.87e-18	1	programmed_cell_death_protein_6-like
LOC121428312	9.86e-23	0.490197	0.997	0.968	1.88e-18	1	actin,_cytoskeletal_1A
LOC121431605	1.12e-22	0.541282	0.825	0.595	2.14e-18	1	gelsolin-like_protein_1
LOC121416581	1.26e-22	0.30895	0.328	0.123	2.4e-18	1	elongation_of_very_long_chain_fatty_acids_protein_6-like
LOC121413556	1.26e-22	0.377589	0.289	0.101	2.4e-18	1	probable_phosphoglycerate_kinase
LOC121411905	1.27e-22	0.374554	0.301	0.109	2.42e-18	1	protein_O-glucosyltransferase_1-like
LOC121409239	1.53e-22	-0.532265	0.964	0.916	2.92e-18	1	14-3-3_family_protein_artA-like
LOC121425187	2.06e-22	0.288838	0.286	0.095	3.93e-18	1	insulin-like_growth_factor-binding_protein_7
LOC121428983	2.41e-22	-1.7074	0.428	0.615	4.61e-18	1	uncharacterized_LOC121428983
LOC121409166	3.83e-22	0.340502	0.25	0.08	7.31e-18	1	switch-associated_protein_70-like
LOC121417612	4.59e-22	-0.297999	1	0.991	8.77e-18	1	40S_ribosomal_protein_S11-like
LOC121414146	5.12e-22	0.366359	0.337	0.131	9.78e-18	1	superoxide_dismutase_[Mn],_mitochondrial-like
LOC121417135	7.66e-22	0.419325	0.735	0.446	1.46e-17	1	proline-rich_transmembrane_protein_1-like
LOC121427468	8.81e-22	0.615233	0.855	0.626	1.68e-17	1	tubulin_beta_chain-like
LOC121405802	9.4e-22	0.571956	0.732	0.495	1.8e-17	1	transaldolase-like
LOC121430396	9.75e-22	0.354605	0.452	0.205	1.86e-17	1	phospholipid_scramblase_2-like
LOC121431806	1.02e-21	-0.321319	0.997	0.993	1.95e-17	1	40S_ribosomal_protein_S24-like
LOC121411428	1.47e-21	-0.454187	0.976	0.928	2.82e-17	1	nucleoside_diphosphate_kinase_A_2-like
LOC121426623	2.57e-21	0.267318	0.277	0.096	4.9e-17	1	solute_carrier_organic_anion_transporter_family_member_4A1-like
LOC121420519	2.67e-21	-0.316573	1	0.982	5.1e-17	1	40S_ribosomal_protein_S25-like
LOC121431693	3.01e-21	0.464663	0.735	0.49	5.76e-17	1	uncharacterized_LOC121431693
LOC121420173	5.24e-21	-0.872463	0.09	0.333	1e-16	1	uncharacterized_LOC121420173
LOC121430850	5.46e-21	-1.07633	0.145	0.385	1.04e-16	1	protein_sprouty_homolog_3-like
LOC121431731	6.03e-21	0.414442	0.461	0.217	1.15e-16	1	stearoyl-CoA_desaturase_5-like
LOC121411241	6.93e-21	0.485605	0.687	0.416	1.32e-16	1	phosphoserine_aminotransferase-like
LOC121429395	7.11e-21	0.312728	0.28	0.1	1.36e-16	1	dynein_regulatory_complex_protein_9-like
LOC121418263	7.26e-21	-1.32944	0.148	0.389	1.39e-16	1	calmodulin
LOC121430902	1.03e-20	0.33462	0.464	0.218	1.96e-16	1	transmembrane_protein_14C-like
LOC121421046	1.03e-20	-1.04038	0.199	0.431	1.97e-16	1	tetraspanin-6-like
LOC121407329	1.3e-20	-1.13168	0.166	0.397	2.49e-16	1	dachshund_homolog_1-like
LOC121410910	2.19e-20	-0.984872	0.681	0.717	4.19e-16	1	endonuclease_8-like_2
LOC121420133	2.48e-20	-0.304802	0.997	0.989	4.74e-16	1	40S_ribosomal_protein_S19-like
LOC121422780	2.57e-20	0.376048	0.804	0.539	4.91e-16	1	myosin-11-like
LOC121428230	2.59e-20	0.28333	0.28	0.101	4.95e-16	1	anoctamin-7-like
LOC121423320	3.09e-20	0.445988	0.774	0.528	5.91e-16	1	rho_GDP-dissociation_inhibitor_1-like
LOC121420211	3.36e-20	0.598964	0.569	0.311	6.41e-16	1	uncharacterized_LOC121420211
LOC121410444	3.49e-20	-1.12064	0.066	0.298	6.67e-16	1	metalloproteinase_inhibitor_1-like
LOC121424816	1.02e-19	0.390548	0.705	0.433	1.94e-15	1	protein_phosphatase_1_regulatory_subunit_3B-B-like
LOC121418892	1.14e-19	-1.20397	0.208	0.426	2.17e-15	1	homeobox_protein_SIX6-like
LOC121409167	1.62e-19	0.334661	0.467	0.231	3.08e-15	1	uncharacterized_LOC121409167
LOC121422212	2.13e-19	0.300632	0.286	0.106	4.06e-15	1	kinesin-like_protein_KIF19
LOC121414144	2.54e-19	0.377345	0.389	0.178	4.84e-15	1	moesin
LOC121427539	2.95e-19	0.302243	0.268	0.097	5.64e-15	1	inactive_C-alpha-formylglycine-generating_enzyme_2-like
LOC121430536	2.98e-19	0.503827	0.864	0.64	5.7e-15	1	myosin_regulatory_light_chain_2,_smooth_muscle_minor_isoform-like
LOC121410556	2.99e-19	-1.07855	0.928	0.907	5.71e-15	1	procathepsin_L-like
LOC446190	4.67e-19	-0.743937	0.861	0.855	8.92e-15	1	guanine_nucleotide-binding_protein_G(i)_alpha_subunit
LOC121428446	6.59e-19	0.259335	0.274	0.101	1.26e-14	1	neuronal_calcium_sensor_1-like
LOC121405654	7.59e-19	-1.03903	0.084	0.3	1.45e-14	1	interferon_alpha-inducible_protein_27-like_protein_1
LOC121425834	1.1e-18	-1.91296	0.232	0.442	2.09e-14	1	muscle_M-line_assembly_protein_unc-89-like
LOC121415073	1.12e-18	0.369154	0.37	0.164	2.13e-14	1	fructose-1,6-bisphosphatase_1-like
LOC121427447	1.28e-18	0.359932	0.322	0.135	2.45e-14	1	triosephosphate_isomerase-like
LOC121428545	1.48e-18	-0.997674	0.078	0.299	2.82e-14	1	ficolin-3-like
LOC121427339	1.67e-18	0.388556	0.651	0.386	3.19e-14	1	EF-hand_domain-containing_protein_D2_homolog
LOC121413087	4.72e-18	0.272892	1	0.992	9.01e-14	1	elongation_factor_1-alpha
LOC121429626	5.13e-18	0.327228	0.5	0.26	9.8e-14	1	transmembrane_protein_272-like
LOC121427642	5.76e-18	-0.692423	0.045	0.25	1.1e-13	1	uncharacterized_LOC121427642
LOC121405742	8.87e-18	0.333759	0.334	0.145	1.69e-13	1	serine/threonine-protein_kinase_33-like
LOC121415988	9.09e-18	0.318723	0.277	0.11	1.74e-13	1	dehydrogenase/reductase_SDR_family_member_11-like
LOC121427605	1.01e-17	-0.603966	0.813	0.787	1.93e-13	1	translocon-associated_protein_subunit_gamma-like
LOC121424004	1.12e-17	0.402206	0.422	0.213	2.14e-13	1	NADH_dehydrogenase_[ubiquinone]_1_alpha_subcomplex_subunit_7-like
LOC121432020	1.15e-17	0.35045	0.47	0.243	2.2e-13	1	S-adenosylmethionine_synthase-like
LOC121432229	1.24e-17	0.304689	0.286	0.114	2.36e-13	1	calcium-activated_potassium_channel_subunit_alpha-1-like
LOC121406022	1.28e-17	-0.891608	0.072	0.283	2.44e-13	1	interferon_alpha-inducible_protein_27-like_protein_2A
LOC121427376	1.74e-17	0.431439	0.714	0.476	3.32e-13	1	enolase-like
LOC121411806	1.74e-17	-0.303203	0.997	0.983	3.33e-13	1	60S_ribosomal_protein_L18a-like
LOC121420063	1.79e-17	-1.5129	0.313	0.507	3.42e-13	1	AAC-rich_mRNA_clone_AAC4_protein-like
LOC121422594	1.94e-17	-0.664487	0.063	0.275	3.7e-13	1	methyltransferase-like_protein_27
LOC121412352	2.02e-17	0.457222	0.569	0.344	3.85e-13	1	cyclin-I-like
LOC121405666	2.47e-17	0.320086	0.25	0.094	4.71e-13	1	GDP-L-fucose_synthase-like
LOC121411605	2.57e-17	0.421177	0.66	0.416	4.92e-13	1	myosin-2_essential_light_chain-like
LOC121415027	3.1e-17	-0.771246	0.889	0.875	5.93e-13	1	tropomyosin-like
LOC446192	3.43e-17	0.434268	0.916	0.736	6.55e-13	1	extracellular_matrix_protein_18
LOC121410189	4.33e-17	0.273538	0.286	0.115	8.28e-13	1	5-aminolevulinate_synthase,_erythroid-specific,_mitochondrial-like
LOC121431818	4.77e-17	0.296467	0.473	0.239	9.12e-13	1	uncharacterized_LOC121431818
LOC121430447	4.86e-17	0.331375	0.373	0.175	9.28e-13	1	tyrosine-protein_kinase_Yes-like
LOC121419686	5.28e-17	-0.915331	0.099	0.304	1.01e-12	1	transcription_factor_GATA-3-like
LOC121424809	6.02e-17	-0.929695	0.093	0.298	1.15e-12	1	neuroblast_differentiation-associated_protein_AHNAK-like
LOC121411299	6.45e-17	0.289329	0.283	0.116	1.23e-12	1	uncharacterized_LOC121411299
LOC121431592	9.71e-17	0.320909	0.497	0.27	1.85e-12	1	SH2_domain-containing_protein_4B-like
LOC121428221	1.59e-16	0.312359	0.256	0.099	3.03e-12	1	dynein_regulatory_complex_protein_1-like
LOC121429599	2.35e-16	0.343394	0.78	0.544	4.48e-12	1	mid1-interacting_protein_1A-like
LOC121420378	3.07e-16	0.276348	0.41	0.205	5.86e-12	1	prenylated_Rab_acceptor_protein_1-like
LOC121420938	3.13e-16	0.357695	0.973	0.768	5.97e-12	1	40S_ribosomal_protein_S16-like
LOC121432038	3.67e-16	-0.785397	0.06	0.255	7.01e-12	1	atrophin-1-like
LOC121411240	4.04e-16	0.331634	0.322	0.144	7.71e-12	1	pyruvate_kinase_PKM-like
LOC121428859	4.17e-16	-1.10702	0.19	0.391	7.96e-12	1	hemicentin-1-like
LOC121431716	4.18e-16	0.325553	0.994	0.931	7.98e-12	1	peptidyl-prolyl_cis-trans_isomerase
LOC121422183	4.5e-16	0.477644	0.62	0.395	8.59e-12	1	myosin-10-like
LOC121430690	4.97e-16	0.402598	0.563	0.334	9.5e-12	1	Krueppel-like_factor_10
LOC121424952	5.45e-16	0.284635	0.301	0.128	1.04e-11	1	2,3-bisphosphoglycerate-independent_phosphoglycerate_mutase-like
LOC121431951	5.81e-16	0.308924	0.283	0.121	1.11e-11	1	alpha-2-macroglobulin_receptor-associated_protein-like
LOC121411673	6.6e-16	-0.689045	0.732	0.73	1.26e-11	1	translocon-associated_protein_subunit_delta-like
LOC121418780	7.29e-16	-1.16649	0.16	0.361	1.39e-11	1	glutathione-specific_gamma-glutamylcyclotransferase_1-like
LOC121422018	7.49e-16	-0.378093	0.985	0.944	1.43e-11	1	60S_acidic_ribosomal_protein_P0-like
LOC121410689	1.48e-15	-0.830335	0.075	0.268	2.82e-11	1	collagen_alpha-1(I)_chain-like
LOC121415559	1.82e-15	-0.651038	0.753	0.728	3.47e-11	1	translocon-associated_protein_subunit_beta-like
LOC121407691	2.49e-15	0.401619	0.322	0.151	4.76e-11	1	dynein_light_chain_roadblock-type_2-like
LOC121410156	4.01e-15	0.351309	0.482	0.252	7.66e-11	1	nucleolar_protein_dao-5-like
LOC121413120	4.27e-15	-0.785789	0.401	0.55	8.16e-11	1	RING-box_protein_1
LOC121419895	4.43e-15	0.318963	0.262	0.11	8.46e-11	1	intraflagellar_transport_protein_46_homolog
LOC121415652	4.44e-15	-0.871372	0.265	0.45	8.47e-11	1	microtubule-associated_protein_1B-like
LOC121413347	5.14e-15	0.274692	0.268	0.111	9.82e-11	1	charged_multivesicular_body_protein_1b-like
LOC121408055	8.12e-15	-0.853787	0.464	0.601	1.55e-10	1	core-binding_factor_subunit_beta-like
LOC121407319	9.17e-15	-1.01239	0.102	0.292	1.75e-10	1	dachshund_homolog_1-like
LOC121423374	1.11e-14	-0.260777	1	0.989	2.13e-10	1	40S_ribosomal_protein_S2
LOC121424951	1.27e-14	-1.50952	0.377	0.53	2.42e-10	1	uncharacterized_LOC121424951
LOC121432077	1.41e-14	-0.427689	0.982	0.929	2.69e-10	1	heterogeneous_nuclear_ribonucleoprotein_D-like
LOC121408346	1.7e-14	0.289095	0.319	0.15	3.24e-10	1	probable_aminopeptidase_NPEPL1
LOC121426187	1.8e-14	-1.22261	0.37	0.54	3.43e-10	1	uncharacterized_LOC121426187
LOC121426284	2.42e-14	0.766427	0.738	0.613	4.62e-10	1	uncharacterized_LOC121426284
LOC121424918	2.48e-14	-0.919159	0.09	0.277	4.74e-10	1	striated_muscle_preferentially_expressed_protein_kinase-like
LOC121422930	3.56e-14	0.3197	0.316	0.148	6.79e-10	1	protocadherin_Fat_1-like
LOC121406525	3.98e-14	0.312157	0.325	0.158	7.6e-10	1	uncharacterized_LOC121406525
LOC121427392	5.09e-14	0.273623	0.518	0.299	9.71e-10	1	tumor_protein_D52-like
LOC121410607	6.37e-14	-0.659837	0.768	0.754	1.22e-09	1	high_mobility_group-T_protein-like
LOC121428662	6.42e-14	-0.88943	0.075	0.251	1.23e-09	1	uncharacterized_LOC121428662
LOC121425503	6.58e-14	-0.775923	0.102	0.284	1.26e-09	1	transcription_factor_AP-4-like
LOC121430479	7.34e-14	-0.624598	0.075	0.252	1.4e-09	1	transcription_factor_21-like
LOC121410002	7.5e-14	0.290343	0.452	0.251	1.43e-09	1	dual_specificity_tyrosine-phosphorylation-regulated_kinase_2-like
LOC121409144	9.27e-14	0.338492	0.377	0.193	1.77e-09	1	autism_susceptibility_gene_2_protein-like
LOC121421128	9.67e-14	0.253534	0.997	0.968	1.85e-09	1	40S_ribosomal_protein_S10-like
LOC121425510	1.04e-13	-0.788192	0.157	0.338	1.99e-09	1	uncharacterized_LOC121425510
LOC121410681	1.05e-13	-0.821175	0.096	0.274	2e-09	1	uncharacterized_LOC121410681
LOC121416923	1.2e-13	0.332108	0.768	0.537	2.29e-09	1	profilin-like
LOC121405977	1.2e-13	-0.788624	0.783	0.846	2.29e-09	1
LOC121406318	1.49e-13	-1.26908	0.386	0.514	2.85e-09	1	trichohyalin-like
LOC121420380	1.53e-13	-0.814033	0.521	0.66	2.92e-09	1	protein_BTG3-like
LOC121426629	1.58e-13	0.300565	0.337	0.165	3.02e-09	1	hydroxyacid_oxidase_1-like
LOC121424934	1.59e-13	-1.97734	0.127	0.306	3.04e-09	1	myosin_light_chain_kinase,_smooth_muscle-like
LOC121424968	2.18e-13	-1.42021	0.238	0.4	4.17e-09	1	uncharacterized_LOC121424968
LOC121421443	2.88e-13	0.296948	0.349	0.178	5.5e-09	1	NADH_dehydrogenase_[ubiquinone]_1_alpha_subcomplex_subunit_9,_mitochondrial-like
LOC121431736	3.88e-13	-1.01496	0.578	0.677	7.42e-09	1	tubulin_alpha-3_chain-like
LOC121431114	4.28e-13	0.265194	0.428	0.231	8.17e-09	1	elongation_factor_1-alpha_2-like
LOC121419265	4.54e-13	-0.764273	0.873	0.863	8.67e-09	1	heat_shock_protein_HSP_90-beta-like
LOC121428497	4.63e-13	0.258384	0.461	0.263	8.84e-09	1	nucleolar_protein_dao-5-like
LOC121415924	7.53e-13	0.264132	0.473	0.278	1.44e-08	1	basigin-like
LOC121411455	1.35e-12	0.310155	0.455	0.263	2.58e-08	1	cAMP-dependent_protein_kinase_type_II_regulatory_subunit
LOC121411556	1.43e-12	-0.903634	0.681	0.727	2.74e-08	1	thyrotroph_embryonic_factor-like
LOC121417735	1.87e-12	-0.599391	0.636	0.68	3.57e-08	1	eukaryotic_translation_initiation_factor_1-like
LOC121411810	2.08e-12	0.288581	0.307	0.15	3.98e-08	1	mannose-1-phosphate_guanyltransferase_beta-like
LOC121410373	2.17e-12	-1.06641	0.31	0.458	4.15e-08	1	CDC42_small_effector_protein_2-like
LOC121418747	2.24e-12	-0.293825	0.681	0.426	4.27e-08	1	arginine_kinase-like
LOC121408911	3.12e-12	0.297525	0.614	0.414	5.97e-08	1	major_vault_protein
LOC121421063	3.34e-12	0.286695	0.774	0.576	6.37e-08	1	ADP-ribosylation_factor_2
LOC121428652	3.38e-12	0.312526	0.72	0.51	6.45e-08	1	flotillin-1-like
LOC121405722	3.43e-12	0.295357	0.548	0.341	6.55e-08	1	src_substrate_cortactin-like
LOC121411425	5.69e-12	0.30364	0.738	0.536	1.09e-07	1	methylsterol_monooxygenase_1-like
LOC121409241	6.27e-12	0.270142	0.636	0.42	1.2e-07	1	selenoprotein_M-like
LOC121429222	7.92e-12	1.14681	0.828	0.729	1.51e-07	1	uncharacterized_LOC121429222
LOC121422490	1.59e-11	-0.38153	0.91	0.836	3.03e-07	1	cytochrome_c_oxidase_subunit_6B1-like
LOC121409900	1.7e-11	0.281156	0.446	0.26	3.24e-07	1	calmodulin-like_protein_4
LOC121423946	1.98e-11	-0.6501	0.136	0.297	3.77e-07	1	cysteine/serine-rich_nuclear_protein_1-like
LOC121418654	2.17e-11	-0.615905	0.142	0.309	4.15e-07	1	serum_response_factor-like
LOC121407001	2.71e-11	-0.677408	0.111	0.269	5.18e-07	1	uncharacterized_LOC121407001
LOC121413772	2.93e-11	-0.798906	0.102	0.26	5.59e-07	1	uncharacterized_LOC121413772
LOC121411843	3.33e-11	0.415472	0.539	0.354	6.37e-07	1	endoplasmin-like
LOC121415315	6.69e-11	-0.8735	0.316	0.453	1.28e-06	1	cyclic_AMP-responsive_element-binding_protein_3-like_protein_4
LOC121430637	7.01e-11	-0.826656	0.268	0.415	1.34e-06	1	transcription_factor_SOX-4-like
LOC121421104	7.98e-11	0.314897	0.636	0.443	1.52e-06	1	NADH-cytochrome_b5_reductase_3-like
LOC121423267	9e-11	-0.306111	0.994	0.967	1.72e-06	1	histone_H3.3A
LOC121424199	9.64e-11	-0.805457	0.151	0.308	1.84e-06	1
LOC121405821	1.46e-10	-0.274363	0.994	0.944	2.8e-06	1	60S_ribosomal_protein_L10a-like
LOC121423694	1.47e-10	-0.681892	0.283	0.423	2.81e-06	1	transcription_factor_BTF3_homolog_4-like
LOC121409056	1.54e-10	-0.916641	0.148	0.299	2.94e-06	1	teneurin-3-like
LOC121425419	1.62e-10	-0.586282	0.536	0.612	3.09e-06	1	casein_kinase_I-like
LOC121417436	1.92e-10	-0.614721	0.687	0.694	3.67e-06	1	proliferation-associated_protein_2G4-like
LOC121407440	2.03e-10	-0.78359	0.151	0.303	3.87e-06	1	large_neutral_amino_acids_transporter_small_subunit_1-like
LOC121419247	2.34e-10	-0.762651	0.114	0.262	4.48e-06	1	regulator_of_G-protein_signaling_7-like
LOC121410168	2.69e-10	-0.966586	0.133	0.276	5.14e-06	1	sodium-_and_chloride-dependent_GABA_transporter_1-like
LOC121432078	2.77e-10	-1.70417	0.181	0.326	5.28e-06	1	titin-like
LOC121428217	4.06e-10	-0.586662	0.708	0.708	7.76e-06	1	nucleolin-like
LOC121429767	4.18e-10	-1.02025	0.229	0.367	7.98e-06	1	diacylglycerol_kinase_delta-like
LOC121430677	4.32e-10	-0.67158	0.142	0.295	8.25e-06	1	myc_protein-like
LOC121430776	4.49e-10	-0.766018	0.205	0.347	8.57e-06	1	serine/threonine-protein_kinase_Sgk1-like
LOC121422897	4.53e-10	-0.826992	0.289	0.418	8.64e-06	1	nuclear_distribution_protein_nudE-like_1-A
LOC121408350	5.02e-10	0.26921	0.343	0.192	9.58e-06	1	unconventional_myosin-XVIIIa-like
LOC121425133	5.77e-10	-0.700273	0.232	0.38	1.1e-05	1	uncharacterized_LOC121425133
LOC121415055	7.9e-10	0.296198	0.783	0.603	1.51e-05	1	tropomyosin-2-like
LOC121430149	8.19e-10	-0.690758	0.627	0.64	1.56e-05	1	glypican-6-like
LOC121423647	1.12e-09	-0.655663	0.822	0.811	2.13e-05	1	transcription_factor_AP-1-like
LOC121415581	1.36e-09	-0.642347	0.633	0.637	2.6e-05	1	keratinocyte-associated_protein_2-like
LOC121431885	1.44e-09	0.622264	0.413	0.25	2.75e-05	1	histone_H4
LOC121410320	1.97e-09	-0.474016	0.768	0.754	3.76e-05	1	heterogeneous_nuclear_ribonucleoprotein_A3-like
LOC121410741	1.99e-09	0.253536	0.587	0.394	3.81e-05	1	serine_hydroxymethyltransferase,_mitochondrial-like
LOC121411318	2.04e-09	-0.598713	0.114	0.257	3.89e-05	1	rho_guanine_nucleotide_exchange_factor_3-like
LOC121423262	2.21e-09	-1.02392	0.235	0.364	4.23e-05	1	chromobox_protein_homolog_8-like
LOC121423799	2.36e-09	-0.836398	0.69	0.732	4.52e-05	1	MAP_kinase-interacting_serine/threonine-protein_kinase_1-like
LOC121426055	2.94e-09	-0.413236	0.892	0.797	5.61e-05	1	cytochrome_c-like
LOC121416984	3e-09	-1.07983	0.238	0.356	5.73e-05	1	uncharacterized_LOC121416984
LOC121406261	3.29e-09	-0.846077	0.241	0.373	6.28e-05	1	uncharacterized_LOC121406261
LOC121426088	3.58e-09	0.258193	0.593	0.407	6.83e-05	1	grancalcin-like
LOC121424678	3.65e-09	-0.677477	0.539	0.591	6.96e-05	1	mitotic_apparatus_protein_p62-like
LOC121418955	4.69e-09	-0.334799	0.925	0.831	8.96e-05	1	uncharacterized_LOC121418955
LOC121422407	5.15e-09	-0.411551	0.84	0.882	9.83e-05	1	histone_H1-delta-like
LOC121411195	5.21e-09	-0.641954	0.223	0.351	9.94e-05	1	heat_shock_cognate_71_kDa_protein-like
LOC121419639	5.76e-09	0.266367	0.431	0.275	0.000110022	1	syndecan-like
LOC121421396	6.17e-09	-0.700938	0.169	0.304	0.0001178	1	low-density_lipoprotein_receptor-related_protein_6-like
LOC121421134	6.94e-09	-0.870497	0.527	0.574	0.000132634	1	calumenin-like
LOC121409681	7.78e-09	-0.718887	0.13	0.259	0.000148658	1	histone_acetyltransferase_KAT6B-like
LOC121423743	8.89e-09	-0.444719	0.753	0.726	0.000169829	1	thioredoxin-1-like
LOC121415455	9.2e-09	0.303619	0.395	0.238	0.000175638	1	tetraspanin-36-like
LOC121415207	1.44e-08	-0.712278	0.247	0.374	0.000275561	1	myocyte-specific_enhancer_factor_2A-like
LOC121418502	1.7e-08	-1.50859	0.127	0.251	0.000325151	1	calmodulin
LOC121430345	1.77e-08	-0.671071	0.154	0.285	0.00033776	1	cytoplasmic_protein_NCK2-like
LOC121407357	2.03e-08	-0.633226	0.136	0.265	0.000387778	1	ATP-dependent_RNA_helicase_DDX1-like
LOC121413886	2.31e-08	-0.539486	0.232	0.358	0.000440303	1	heterogeneous_nuclear_ribonucleoprotein_R-like
LOC121424948	2.42e-08	-2.07221	0.407	0.485	0.000462772	1	uncharacterized_LOC121424948
LOC121410256	2.61e-08	-1.06676	0.319	0.426	0.000498809	1	rho-related_protein_racA-like
LOC121421028	2.85e-08	0.258441	0.389	0.244	0.000543562	1	protein_lin-7_homolog_C-like
LOC121407906	2.89e-08	0.262648	0.69	0.501	0.000551404	1	adenosylhomocysteinase_A-like
LOC121426908	3.05e-08	-0.287573	0.973	0.909	0.00058268	1	insulin-like_growth_factor_2_mRNA-binding_protein_3
LOC121429703	3.37e-08	-0.666971	0.16	0.285	0.000643099	1	eukaryotic_translation_initiation_factor_2A-like
LOC121420405	3.43e-08	-0.483748	0.75	0.736	0.00065604	1	ATP-dependent_RNA_helicase_cgh-1-like
LOC121416183	3.65e-08	-0.287187	0.988	0.961	0.00069802	1	14-3-3-like_protein_2
LOC121415989	5e-08	-0.826019	0.304	0.413	0.000955824	1	transcription_factor_HIVEP3-like
LOC121407704	5.69e-08	0.400997	0.494	0.356	0.00108714	1	adenosylhomocysteinase_A-like
LOC121414204	5.91e-08	-0.74855	0.398	0.491	0.00112966	1	E3_ubiquitin-protein_ligase_MYCBP2-like
LOC121414511	6.03e-08	-0.724993	0.491	0.53	0.0011519	1	tubulin_alpha-2/alpha-4_chain-like
LOC121431687	6.33e-08	-0.331691	0.97	0.899	0.00120959	1	voltage-dependent_anion-selective_channel_protein_2-like
LOC121410751	6.94e-08	-0.446112	0.169	0.3	0.00132521	1	ETS_translocation_variant_1-like
LOC121428660	7.11e-08	-0.76331	0.175	0.301	0.00135852	1	uncharacterized_LOC121428660
LOC121430638	7.36e-08	-0.396253	0.672	0.446	0.00140654	1	monocarboxylate_transporter_2-like
LOC121423785	9.82e-08	-0.714842	0.238	0.348	0.00187545	1	Krueppel-like_factor_6
LOC121416906	1.27e-07	-0.858289	0.217	0.337	0.00242744	1	uncharacterized_LOC121416906
LOC121415204	1.34e-07	-0.350712	0.858	0.784	0.00256342	1	cytochrome_c_oxidase_subunit_5A,_mitochondrial-like
LOC121408907	1.62e-07	-0.584787	0.63	0.642	0.00309632	1	transcription_elongation_factor_SPT6-like
LOC121416009	1.67e-07	-0.610777	0.304	0.41	0.00318283	1	ubiquitin-conjugating_enzyme_E2_R2-like
LOC121418759	1.79e-07	-0.691111	0.199	0.318	0.00342804	1	protein_piccolo-like
LOC121418204	1.86e-07	-0.570638	0.232	0.342	0.00355528	1	sprouty-related,_EVH1_domain-containing_protein_2-like
LOC121427191	2.1e-07	-0.40315	0.883	0.817	0.00401205	1	nucleolin-like
LOC121416918	2.64e-07	-0.252915	0.961	0.906	0.005044	1	60S_ribosomal_protein_L12-like
LOC121418911	3.62e-07	-0.587797	0.437	0.521	0.00691981	1	EH_domain-containing_protein_1-like
LOC121431622	4.05e-07	-0.642103	0.169	0.285	0.00774372	1	uncharacterized_LOC121431622
LOC121429286	4.08e-07	-0.68553	0.268	0.374	0.00778909	1	uncharacterized_LOC121429286
LOC121410179	4.35e-07	-0.521945	0.699	0.659	0.0083059	1	nascent_polypeptide-associated_complex_subunit_alpha-like
LOC121427213	4.4e-07	-0.344837	0.979	0.929	0.00840947	1	guanine_nucleotide-binding_protein_subunit_beta
LOC121419382	7.13e-07	0.290425	0.383	0.249	0.0136154	1	delta(14)-sterol_reductase_TM7SF2-like
LOC121411391	7.42e-07	-0.587868	0.238	0.346	0.0141672	1	epoxide_hydrolase_3-like
LOC121425063	8.02e-07	-0.496236	0.452	0.525	0.0153162	1	26S_proteasome_non-ATPase_regulatory_subunit_4-like
LOC121425027	8.35e-07	-0.712042	0.181	0.282	0.0159529	1	F-box/LRR-repeat_protein_2-like
LOC121406364	8.7e-07	-0.664463	0.542	0.595	0.0166176	1	uncharacterized_LOC121406364
LOC121430846	1.11e-06	-0.373934	0.792	0.739	0.0211101	1	cytochrome_c_oxidase_subunit_5B,_mitochondrial-like
LOC121415211	1.26e-06	-0.549065	0.163	0.273	0.0240145	1	RNA_polymerase_II_elongation_factor_ELL-like
LOC121429444	1.38e-06	-0.585115	0.443	0.506	0.0263578	1	eukaryotic_initiation_factor_4A-I-like
LOC121428341	1.7e-06	-0.416455	0.768	0.735	0.0325206	1	protein_SET-like
LOC121419094	1.71e-06	-0.453329	0.166	0.276	0.0326261	1	transcriptional_adapter_2-beta-like
LOC121420416	2.32e-06	-0.602224	0.211	0.316	0.0443079	1	DNA-directed_RNA_polymerases_I,_II,_and_III_subunit_RPABC3-like
LOC121408645	2.39e-06	-0.453968	0.62	0.627	0.0455582	1	proteasome_maturation_protein-like
LOC121423226	2.58e-06	-0.520572	0.283	0.387	0.0492319	1	THO_complex_subunit_4-like
LOC121411626	2.81e-06	-0.58098	0.169	0.278	0.0535858	1	serine/threonine-protein_kinase_pim-1-like
LOC121419389	2.98e-06	-0.758835	0.678	0.644	0.0568647	1	mRNA_decay_activator_protein_ZFP36L2-A-like
LOC121424943	3.49e-06	-0.753819	0.431	0.49	0.0666566	1	G_protein-coupled_receptor_kinase_5-like
LOC121425227	3.86e-06	-1.08195	0.178	0.285	0.0737174	1	centrosomal_protein_of_55_kDa-like
LOC121425929	4.01e-06	-0.387824	0.819	0.747	0.0765634	1	ADP-ribosylation_factor_1-like
LOC121411662	4.22e-06	-0.405885	0.738	0.71	0.0806862	1	phosphate_carrier_protein,_mitochondrial-like
LOC121411494	4.38e-06	-0.508783	0.557	0.591	0.0837153	1	AN1-type_zinc_finger_protein_5-like
LOC121407990	4.78e-06	-0.487502	0.596	0.602	0.0912174	1	NEDD8
LOC121414451	5.42e-06	-0.253435	0.901	0.815	0.103564	1	40S_ribosomal_protein_S4-like
LOC121420144	6.6e-06	-0.580593	0.289	0.382	0.126118	1	uncharacterized_LOC121420144
LOC121432057	6.71e-06	-0.30452	0.383	0.238	0.128215	1	monocarboxylate_transporter_13-like
LOC121419405	7.1e-06	-0.664408	0.28	0.365	0.135543	1	cellular_retinoic_acid-binding_protein_1-like
LOC121424577	8.1e-06	-0.363835	0.753	0.705	0.154717	1	uncharacterized_LOC121424577
LOC121408550	8.45e-06	-0.457598	0.587	0.608	0.161301	1	GTP-binding_nuclear_protein_Ran-like
LOC121423022	9.81e-06	-0.731135	0.452	0.519	0.187283	1	mitogen-activated_protein_kinase_kinase_kinase_13-like
LOC121411823	9.81e-06	-0.442517	0.169	0.269	0.187422	1	constitutive_coactivator_of_PPAR-gamma-like_protein_1_homolog
LOC121418862	9.94e-06	0.385563	0.295	0.192	0.189815	1	heat_shock_protein_Hsp-16.48/Hsp-16.49-like
LOC121427486	1.11e-05	-0.491472	0.247	0.34	0.211122	1	2-phosphoxylose_phosphatase_1-like
LOC121410720	1.23e-05	-0.56721	0.355	0.44	0.234522	1	bromodomain_adjacent_to_zinc_finger_domain_protein_2B-like
LOC121413537	1.47e-05	-0.4244	0.199	0.298	0.279874	1	non-POU_domain-containing_octamer-binding_protein-like
LOC121410004	1.56e-05	-0.35206	0.795	0.761	0.298821	1	ras-related_protein_Rap-1b-like
LOC121427391	1.6e-05	-0.392085	0.919	0.868	0.30652	1	gamma-aminobutyric_acid_receptor-associated_protein
LOC121418432	1.78e-05	-0.451002	0.651	0.642	0.339401	1	glycine-rich_RNA-binding_protein_1-like
LOC121411081	2.28e-05	-0.514118	0.256	0.348	0.435482	1	nucleolin-like
LOC121416207	2.35e-05	-0.623565	0.331	0.422	0.447898	1	tubulin_beta_chain-like
LOC121408312	2.57e-05	-0.742718	0.247	0.328	0.489919	1	39S_ribosomal_protein_L3,_mitochondrial-like
LOC121431099	2.64e-05	-0.635606	0.307	0.385	0.503687	1	protein_4.1-like
LOC121407430	2.77e-05	-0.397438	0.557	0.583	0.529135	1	uncharacterized_LOC121407430
LOC121427831	3.47e-05	-0.525853	0.178	0.266	0.662218	1	multiple_epidermal_growth_factor-like_domains_protein_6
LOC121410477	3.58e-05	-0.76165	0.181	0.273	0.684049	1	uncharacterized_LOC121410477
LOC121408797	3.71e-05	-0.525329	0.578	0.582	0.707967	1	eukaryotic_translation_initiation_factor_3_subunit_C-like
LOC121411201	4.06e-05	-0.540963	0.235	0.322	0.775874	1	rho-related_GTP-binding_protein_RhoA-B-like
LOC121415573	4.29e-05	-0.386136	0.614	0.618	0.820034	1	proteasome_subunit_alpha_type-4-like
LOC121415203	4.48e-05	-0.634894	0.37	0.438	0.855224	1	E3_ubiquitin-protein_ligase_arih1-like
LOC121408705	4.48e-05	-0.30638	0.861	0.764	0.855839	1	cytochrome_c_oxidase_subunit_4_isoform_1,_mitochondrial-like
LOC121406090	5.14e-05	-0.600949	0.663	0.659	0.981791	1	protein_phosphatase_1_regulatory_subunit_12B-like
LOC121430633	5.51e-05	0.484055	0.256	0.172	1	1	ribonucleoside-diphosphate_reductase_subunit_M2_B-like
LOC121407089	6.06e-05	-0.602289	0.199	0.281	1	1	cysteine_and_histidine-rich_protein_1-like
LOC121429138	6.66e-05	-0.513433	0.777	0.763	1	1	glutamine_synthetase-like
LOC121429438	7.96e-05	-0.519959	0.172	0.26	1	1	fibronectin_type-III_domain-containing_protein_3A-like
LOC121423169	8.71e-05	0.299608	0.373	0.265	1	1	histone_H4
LOC121422039	8.84e-05	-0.356792	0.792	0.738	1	1	40S_ribosomal_protein_S16-like
LOC121414529	8.97e-05	-0.547806	0.37	0.42	1	1	tubulin_alpha-1_chain-like
LOC121405843	9.04e-05	-0.446197	0.524	0.538	1	1	proteasome_subunit_alpha_type-1-like
LOC121423703	0.000105962	-0.389803	0.241	0.323	1	1	transcription_factor_BTF3_homolog_4-like
LOC121427284	0.000106116	-0.46157	0.458	0.511	1	1	heterogeneous_nuclear_ribonucleoprotein_K_homolog
LOC121409310	0.000115369	-0.456629	0.657	0.627	1	1	ubiquitin-conjugating_enzyme_E2_L3-like
LOC121429095	0.000116043	-0.527581	0.702	0.653	1	1	golgin_subfamily_A_member_6-like_protein_22
LOC121410174	0.000117271	-0.434722	0.331	0.402	1	1	ceramide_synthase_1-like
LOC121429903	0.000120812	-0.511215	0.208	0.289	1	1	uncharacterized_protein_DDB_G0285291-like
LOC121425605	0.000120818	-0.465083	0.407	0.478	1	1	dnaJ_homolog_subfamily_C_member_21-like
LOC121425031	0.000124808	-0.63758	0.512	0.537	1	1	probable_JmjC_domain-containing_histone_demethylation_protein_2C
LOC121421406	0.000124979	-0.270525	0.852	0.763	1	1	protein_transport_protein_Sec61_subunit_beta-like
LOC121429713	0.000142355	-0.514856	0.41	0.45	1	1	collagen_alpha-1(I)_chain-like
LOC121416773	0.0001523	-0.4476	0.175	0.253	1	1	uncharacterized_LOC121416773
LOC121413780	0.000155991	-0.795807	0.262	0.334	1	1	sequestosome-1-like
LOC121427592	0.00016451	-0.508882	0.654	0.642	1	1	translocation_protein_SEC62-like
LOC121418138	0.000166442	-0.632926	0.184	0.265	1	1	NF-kappa-B_inhibitor_alpha-like
LOC121427251	0.000168111	-0.416392	0.572	0.588	1	1	dolichyl-diphosphooligosaccharide--protein_glycosyltransferase_48_kDa_subunit-like
LOC121426430	0.000169004	-0.53897	0.434	0.48	1	1	trichohyalin-like
LOC121424887	0.000210277	-0.568931	0.223	0.295	1	1	protein_FAM53A-like
LOC121427426	0.000216092	-0.439105	0.563	0.563	1	1	prohibitin-2-like
LOC121425696	0.000249155	-0.655087	0.358	0.415	1	1	uncharacterized_LOC121425696
LOC121410178	0.000257813	-0.384034	0.693	0.679	1	1	heterogeneous_nuclear_ribonucleoprotein_A3-like
LOC121423580	0.000262902	-0.57633	0.247	0.318	1	1	NPC_intracellular_cholesterol_transporter_1-like
LOC121407131	0.00027585	-0.371305	0.88	0.769	1	1	60S_ribosomal_protein_L14-like
LOC121410380	0.000295218	-0.411792	0.229	0.306	1	1	LIM_and_SH3_domain_protein_Lasp-like
LOC121428529	0.000301543	-0.614196	0.259	0.322	1	1	laminin_subunit_gamma-1-like
LOC121407404	0.000305883	-0.410116	0.554	0.55	1	1	proteasome_subunit_alpha_type-7
LOC121406953	0.000314044	-0.477017	0.877	0.837	1	1
LOC121410357	0.000336717	-0.475173	0.292	0.357	1	1	dnaJ_homolog_subfamily_A_member_1-like
LOC121408856	0.000363044	-0.565664	0.331	0.386	1	1	homeobox_protein_cut-like_1
LOC121408139	0.000414641	-0.367931	0.614	0.609	1	1	proteasome_subunit_beta_type-5-like
LOC121414134	0.000428832	-0.381177	0.184	0.258	1	1	ATP-dependent_RNA_helicase_DDX18-like
LOC121409069	0.000431049	-0.388863	0.38	0.441	1	1	SREBP_regulating_gene_protein-like
LOC121415910	0.000434607	-0.71681	0.232	0.3	1	1	uncharacterized_LOC121415910
LOC121418700	0.000469133	-0.274962	0.846	0.747	1	1	elongation_factor_1-gamma-like
LOC121423729	0.00050718	-0.483105	0.503	0.52	1	1	muscle-specific_protein_20-like
LOC121415061	0.00051607	-0.312876	0.642	0.63	1	1	small_ubiquitin-related_modifier_3-like
LOC121425727	0.000647085	-0.729336	0.437	0.459	1	1	uncharacterized_LOC121425727
LOC121424832	0.000811412	-0.459635	0.298	0.369	1	1	titin_homolog
LOC121428562	0.00087186	-0.256048	0.241	0.315	1	1	eukaryotic_translation_initiation_factor_3_subunit_G-like
LOC121415660	0.000917956	-0.445672	0.572	0.576	1	1	activated_RNA_polymerase_II_transcriptional_coactivator_p15-like
LOC121418538	0.000936836	-0.394444	0.244	0.319	1	1	stress-induced-phosphoprotein_1-like
LOC121411476	0.00101492	-0.483104	0.331	0.394	1	1	NK-tumor_recognition_protein-like
LOC121428511	0.00103085	-0.544391	0.47	0.497	1	1	cdc42-interacting_protein_4-like
LOC121424764	0.00105224	-0.368184	0.295	0.357	1	1	nucleolar_protein_56-like
LOC121410251	0.0011973	-0.465882	0.31	0.367	1	1	transcription_factor_12-like
LOC121420217	0.00130632	-0.347559	0.193	0.265	1	1	ribosomal_RNA_processing_protein_1_homolog_A-like
LOC121430760	0.00146257	-0.301647	0.361	0.256	1	1	actin_CyI,_cytoplasmic-like
LOC121431668	0.00152056	-0.560096	0.259	0.314	1	1	protein_bicaudal_C_homolog_1-B-like
LOC121419262	0.00160247	-0.524578	0.506	0.513	1	1	Golgi_resident_protein_GCP60-like
LOC121407840	0.00168991	0.386407	0.346	0.27	1	1	ribonucleoside-diphosphate_reductase_large_subunit-like
LOC121413928	0.00182303	-0.507676	0.226	0.286	1	1	protein_mono-ADP-ribosyltransferase_PARP4-like
LOC121423984	0.00188074	-0.301134	0.81	0.708	1	1	cytochrome_b-c1_complex_subunit_6,_mitochondrial-like
LOC121428551	0.00190832	-0.552571	0.289	0.35	1	1	myomegalin-like
LOC121425875	0.00202482	-0.289426	0.768	0.698	1	1	elongation_factor_1-beta-like
LOC121427648	0.00234741	-0.514017	0.392	0.431	1	1	nucleolin-like
LOC121422974	0.00237447	-0.433387	0.476	0.488	1	1	eukaryotic_peptide_chain_release_factor_GTP-binding_subunit_ERF3A-like
LOC121408814	0.00266311	-0.368068	0.756	0.68	1	1	dynein_light_chain_LC6,_flagellar_outer_arm-like
LOC121405814	0.00271426	-0.448684	0.232	0.289	1	1	anti-apoptotic_protein_NR13-like
LOC121412862	0.00283877	-0.439611	0.536	0.544	1	1	transcriptional_regulator_ATRX_homolog
LOC121422346	0.00293834	-0.440603	0.25	0.305	1	1	cytohesin-1-like
LOC121424717	0.00308899	-0.547926	0.443	0.467	1	1	uncharacterized_LOC121424717
LOC121427237	0.00369739	-0.546317	0.608	0.592	1	1	uncharacterized_LOC121427237
LOC121421223	0.00372481	-0.587721	0.22	0.276	1	1	uncharacterized_LOC121421223
LOC121421729	0.00387743	-0.438825	0.56	0.536	1	1	caprin-1-like
LOC121415629	0.00394608	-0.309207	0.247	0.306	1	1	DET1-_and_DDB1-associated_protein_1-like
LOC121408894	0.00398064	-0.431913	0.253	0.31	1	1	CAP-Gly_domain-containing_linker_protein_1-like
LOC121428566	0.00398454	-0.377447	0.217	0.276	1	1	uridine-cytidine_kinase_2-like
LOC121418797	0.00399539	-0.329524	0.813	0.752	1	1	heterogeneous_nuclear_ribonucleoprotein_U-like_protein_1
LOC121411903	0.00400381	-0.35298	0.521	0.526	1	1	proteasome_subunit_beta_type-4-like
LOC121405677	0.00402166	-0.435393	0.229	0.281	1	1	SH3_and_multiple_ankyrin_repeat_domains_protein_3-like
LOC121430528	0.00403189	-0.537544	0.292	0.341	1	1	transcription_factor_Sox-17-alpha-A-like
LOC121410483	0.0040891	-0.356418	0.431	0.461	1	1	protein_CDV3_homolog
LOC121417596	0.00413159	-0.303199	0.304	0.366	1	1	zinc_finger_CCCH_domain-containing_protein_15-like
LOC121408889	0.00414404	-0.358852	0.413	0.457	1	1	serine/arginine-rich_splicing_factor_1-like
LOC121412113	0.00424476	-0.367397	0.244	0.297	1	1	97_kDa_heat_shock_protein
LOC121419158	0.00425838	-0.438565	0.431	0.461	1	1	reticulon-1-A-like
LOC121410552	0.00425984	-0.480907	0.307	0.354	1	1	activin_receptor_type-2A-like
LOC121423619	0.0047029	-0.381533	0.268	0.321	1	1	nipped-B-like_protein_A
LOC121428855	0.00472232	-0.286006	0.774	0.72	1	1	60S_ribosomal_protein_L7a-like
LOC121406997	0.00488244	-0.394832	0.334	0.374	1	1	dnaJ_homolog_subfamily_A_member_2-like
LOC121405795	0.0051509	-0.279748	0.81	0.722	1	1	transmembrane_protein_258
LOC121419157	0.00529571	-0.335747	0.419	0.303	1	1	cytochrome_P450_3A6-like
LOC121410148	0.00537874	-0.393675	0.581	0.574	1	1	MAP_kinase-activated_protein_kinase_2-like
LOC121427506	0.00545429	-0.445924	0.337	0.385	1	1	SPRY_domain-containing_SOCS_box_protein_4-like
LOC121430669	0.00560169	-0.668103	0.205	0.251	1	1	probable_ATP-dependent_RNA_helicase_DDX60
LOC121427340	0.00562709	-0.47882	0.304	0.353	1	1	7SK_snRNA_methylphosphate_capping_enzyme-like
LOC121429693	0.00569347	-0.566722	0.232	0.289	1	1	uncharacterized_LOC121429693
LOC121408698	0.00581157	-0.366642	0.584	0.555	1	1	RNA-binding_protein_cabeza-like
LOC121410870	0.00609948	-0.725352	0.605	0.47	1	1	procathepsin_L-like
LOC121423953	0.00619801	-0.279429	0.301	0.354	1	1	NADH_dehydrogenase_[ubiquinone]_1_alpha_subcomplex_subunit_7-like
LOC121418633	0.00645831	-0.353114	0.319	0.364	1	1	neutral_and_basic_amino_acid_transport_protein_rBAT-like
LOC121429453	0.00668427	-0.318787	0.31	0.356	1	1	H/ACA_ribonucleoprotein_complex_subunit_DKC1-like
LOC121411745	0.00676589	-0.337514	0.617	0.587	1	1	methionine_aminopeptidase_2-like
LOC121407861	0.00681674	-0.308966	0.208	0.259	1	1	protein_FAM114A2-like
LOC121411145	0.00683546	-0.357332	0.289	0.33	1	1	H/ACA_ribonucleoprotein_complex_subunit_GAR1-like
LOC121423686	0.00687291	-0.387635	0.328	0.369	1	1	probable_rRNA-processing_protein_EBP2
LOC121422190	0.00747719	-0.357851	0.488	0.503	1	1	ER_lumen_protein-retaining_receptor_2
LOC121410947	0.00823825	-0.360981	0.741	0.674	1	1	high_mobility_group_protein_1_homolog
LOC121418514	0.00829872	-0.812072	0.961	0.952	1	1	uncharacterized_LOC121418514
LOC121415221	0.00880839	-0.416397	0.461	0.47	1	1	eukaryotic_translation_initiation_factor_3_subunit_J-like
LOC121415695	0.00885775	-0.337627	0.211	0.258	1	1	ATP_synthase_subunit_alpha,_mitochondrial-like
LOC121426442	0.00943579	-0.374213	0.334	0.377	1	1	hypoxanthine-guanine_phosphoribosyltransferase-like
LOC121427575	0.00988308	-0.605659	0.262	0.308	1	1	transcription_factor_HES-4-like
LOC121423147	0.0101443	-0.365352	0.605	0.588	1	1	NADH_dehydrogenase_[ubiquinone]_1_alpha_subcomplex_subunit_6-like
LOC121429618	0.0103267	-0.431937	0.301	0.338	1	1	glycogenin-1-like
LOC121407519	0.0105579	-0.452792	0.22	0.267	1	1	forkhead_box_protein_C2-B-like
LOC121411214	0.0107475	-0.31302	0.325	0.371	1	1	NADH_dehydrogenase_[ubiquinone]_1_alpha_subcomplex_subunit_2-like
LOC121408906	0.0108724	-0.489144	0.274	0.314	1	1	active_breakpoint_cluster_region-related_protein-like
LOC121407269	0.0112971	-0.475648	0.244	0.286	1	1	uncharacterized_LOC121407269
LOC121408202	0.0115441	-0.605444	0.202	0.257	1	1	A-kinase_anchor_protein_1,_mitochondrial-like
LOC121411010	0.011758	-0.29048	0.578	0.558	1	1	NADH_dehydrogenase_[ubiquinone]_1_alpha_subcomplex_subunit_5-like
LOC121415035	0.0126734	-0.474678	0.25	0.294	1	1	rho_guanine_nucleotide_exchange_factor_18-like
LOC121408239	0.012755	-0.355729	0.235	0.279	1	1	B-cell_CLL/lymphoma_7_protein_family_member_B-A-like
LOC100500774	0.0130408	-0.386923	0.253	0.302	1	1	forkhead_transcription_factor_N2/3
LOC121409138	0.0130581	-0.401775	0.458	0.467	1	1	ran-specific_GTPase-activating_protein-like
LOC121426894	0.0145701	-0.402717	0.497	0.494	1	1	zinc_finger_protein_706-like
LOC121427906	0.0146716	-0.46811	0.292	0.325	1	1	cyclin-L1-like
LOC121431575	0.0148774	-0.340992	0.578	0.562	1	1	S-phase_kinase-associated_protein_1-like
LOC121428802	0.0152724	-0.276712	0.753	0.681	1	1	bromodomain-containing_protein_3-like
LOC121424051	0.0152998	-0.280054	0.413	0.436	1	1	plasminogen_activator_inhibitor_1_RNA-binding_protein-like
LOC121431399	0.0156682	-0.504472	0.404	0.408	1	1	protein_extra-macrochaetae-like
LOC121406698	0.0157933	-0.365259	0.328	0.361	1	1	la-related_protein_1-like
LOC121430748	0.0158107	-0.416478	0.247	0.294	1	1	focal_adhesion_kinase_1-like
LOC121408489	0.0159103	-0.264293	0.202	0.253	1	1	coiled-coil-helix-coiled-coil-helix_domain-containing_protein_2-like
LOC121429484	0.0159754	-0.411454	0.214	0.259	1	1	dedicator_of_cytokinesis_protein_9-like
LOC121406940	0.0169033	-0.36351	0.205	0.251	1	1	telomerase-binding_protein_EST1A-like
LOC121431717	0.0169121	-0.4488	0.304	0.333	1	1	zinc_finger_SWIM_domain-containing_protein_8-like
LOC121405864	0.0169211	-0.321664	0.289	0.329	1	1	T-complex_protein_1_subunit_beta-like
LOC121410605	0.0169414	-0.346914	0.59	0.588	1	1	ras_association_domain-containing_protein_5-like
LOC121428750	0.0171854	-0.382276	0.34	0.368	1	1	nucleolar_protein_58-like
LOC121415894	0.0172442	-0.479498	0.479	0.487	1	1	polyubiquitin-C-like
LOC121427662	0.0175592	-0.401114	0.419	0.435	1	1	calsyntenin-1-like
LOC121416346	0.0179023	-0.426421	0.238	0.274	1	1	46_kDa_FK506-binding_nuclear_protein-like
LOC121418665	0.0187689	-0.348489	0.262	0.301	1	1	actin_cytoskeleton-regulatory_complex_protein_pan1-like
LOC121417224	0.0191226	-0.333525	0.741	0.653	1	1	pumilio_homolog_2-like
LOC121425645	0.0194833	-0.394022	0.491	0.486	1	1	lupus_La_protein_homolog
LOC121411561	0.0208227	-0.300165	0.238	0.278	1	1	serine/arginine-rich_splicing_factor_7-like
LOC121417199	0.0214445	-0.346194	0.319	0.352	1	1	YTH_domain-containing_family_protein_3-like
LOC121429708	0.0222979	-0.366157	0.434	0.453	1	1	importin_subunit_alpha-3-like
LOC121421934	0.0238415	-0.270459	0.349	0.26	1	1	supervillin-like
LOC121431829	0.0245069	-0.270694	0.771	0.674	1	1	ras_GTPase-activating_protein-binding_protein_2-like
LOC121426292	0.0252798	-0.26617	0.211	0.259	1	1	ribonuclease_P_protein_subunit_p25-like_protein
LOC121407278	0.0269162	-0.266289	0.247	0.287	1	1	small_nuclear_ribonucleoprotein-associated_protein_B'-like
LOC121411829	0.0269967	-0.258303	0.602	0.583	1	1	inactive_selenide,_water_dikinase-like_protein
LOC121418950	0.0276953	-0.419377	0.503	0.499	1	1	striatin-3-like
LOC121421101	0.027915	-0.279519	0.229	0.27	1	1	protein_arginine_N-methyltransferase_1-like
LOC121415334	0.027973	-0.283026	0.578	0.547	1	1	uncharacterized_LOC121415334
LOC121411446	0.028151	-0.281739	0.211	0.256	1	1	testin-like
LOC121410645	0.0299143	-0.269077	0.247	0.287	1	1	DNA-directed_RNA_polymerase_I_subunit_RPA34-like
LOC121420210	0.0300571	-0.254271	0.849	0.718	1	1	ATP_synthase-coupling_factor_6,_mitochondrial-like
LOC121418773	0.0300587	-0.58385	0.271	0.305	1	1	fasciculation_and_elongation_protein_zeta-2-like
LOC121407324	0.0301262	-0.309209	0.334	0.369	1	1	small_nuclear_ribonucleoprotein_Sm_D1-like
LOC121413578	0.0311137	-0.34947	0.617	0.513	1	1	uncharacterized_LOC121413578
LOC121407400	0.0318361	-0.413383	0.449	0.452	1	1	apoptotic_chromatin_condensation_inducer_in_the_nucleus-like
LOC121418777	0.0324998	-0.355611	0.557	0.532	1	1	small_nuclear_ribonucleoprotein_Sm_D2
LOC121409076	0.0327227	-0.289507	0.383	0.397	1	1	prefoldin_subunit_6-like
LOC121407100	0.0331045	-0.270127	0.217	0.256	1	1	ras-related_protein_Rab-22A-like
LOC121411934	0.0344179	-0.348016	0.31	0.344	1	1	cytoplasmic_dynein_1_intermediate_chain_2-like
LOC121409131	0.035333	-0.329976	0.22	0.258	1	1	serine/threonine-protein_kinase_TAO1-like
LOC121425998	0.0355048	-0.429068	0.232	0.265	1	1	putative_leucine-rich_repeat-containing_protein_DDB_G0290503
LOC121418929	0.0366211	-0.761241	0.331	0.351	1	1	circularly_permutated_Ras_protein_1-like
LOC121424662	0.0369874	-0.279024	0.31	0.345	1	1	E3_ubiquitin-protein_ligase_KCMF1-like
LOC121411018	0.0372572	-0.30195	0.53	0.51	1	1	ubiquitin-like_modifier-activating_enzyme_1
LOC121417185	0.0397301	-0.342656	0.455	0.445	1	1	26S_proteasome_regulatory_subunit_6A-B
LOC121419306	0.0417599	-0.687096	0.337	0.357	1	1	uncharacterized_LOC121419306
LOC121418597	0.0430923	-0.392545	0.364	0.379	1	1	transport_and_Golgi_organization_protein_1_homolog
LOC121410359	0.0433477	-0.298231	0.389	0.409	1	1	glycerol-3-phosphate_dehydrogenase_[NAD(+)],_cytoplasmic-like
LOC121405615	0.0434617	-0.824899	0.69	0.544	1	1	U6_spliceosomal_RNA
LOC121415028	0.0477322	-0.324626	0.292	0.322	1	1	zinc_finger_RNA-binding_protein-like
LOC121409126	0.0484217	-0.355131	0.479	0.461	1	1	small_nuclear_ribonucleoprotein_Sm_D3-like
LOC121405581	0.0503103	-0.351726	0.253	0.287	1	1	bone_morphogenetic_protein_1_homolog
LOC121427368	0.0550259	-0.359334	0.325	0.341	1	1	eukaryotic_translation_initiation_factor_4_gamma_1-like
LOC121423991	0.0551888	-0.523315	0.461	0.455	1	1	next_to_BRCA1_gene_1_protein-like
LOC121410934	0.0560655	-0.366835	0.352	0.378	1	1	protein_LMBR1L-like
LOC121425072	0.0563099	-0.319583	0.28	0.317	1	1	upstream_activation_factor_subunit_spp27-like
LOC121405827	0.0581568	-0.341767	0.434	0.336	1	1	G1/S-specific_cyclin-D1-like
LOC121411972	0.0595564	-0.303301	0.473	0.47	1	1	coatomer_subunit_zeta-1-like
LOC121419264	0.0606137	-0.274036	0.25	0.28	1	1	uncharacterized_LOC121419264
LOC121405859	0.0615808	-0.532682	0.636	0.62	1	1	uncharacterized_LOC121405859
LOC121423695	0.0623213	-0.271383	0.253	0.278	1	1	splicing_regulatory_glutamine/lysine-rich_protein_1-like
LOC121422932	0.0653708	-0.340672	0.383	0.396	1	1	SUMO-conjugating_enzyme_UBC9-B-like
LOC121421876	0.0675339	-0.393903	0.482	0.476	1	1	pre-mRNA-splicing_factor_CWC22_homolog
LOC121428321	0.0700341	-0.423995	0.361	0.371	1	1	ATP-binding_cassette_sub-family_C_member_4-like
LOC121411615	0.0704221	-0.252007	0.307	0.329	1	1	SWI/SNF-related_matrix-associated_actin-dependent_regulator_of_chromatin_subfamily_E_member_1-like
LOC121423024	0.0721892	-0.270147	0.675	0.601	1	1	acyl_carrier_protein,_mitochondrial-like
LOC121419144	0.0751021	-0.546169	0.31	0.328	1	1	dual_specificity_protein_phosphatase_10-like
LOC121430811	0.0781656	-0.324488	0.319	0.34	1	1	nuclear_receptor-binding_protein-like
LOC121426295	0.0793253	-0.526361	0.304	0.228	1	1	voltage-dependent_L-type_calcium_channel_subunit_beta-1-like
LOC121429694	0.081242	-0.392214	0.38	0.388	1	1	disks_large_homolog_1-like
LOC121408870	0.0818647	-0.278057	0.226	0.252	1	1	DNA_ligase_1-like
LOC121418762	0.0819848	-0.264942	0.639	0.637	1	1	fos-related_antigen_1-like
LOC121428463	0.0846953	-0.44426	0.328	0.343	1	1	ras_GTPase-activating_protein_nGAP-like
LOC121410780	0.0857982	-0.276452	0.352	0.374	1	1	MKI67_FHA_domain-interacting_nucleolar_phosphoprotein-like
LOC121409216	0.0877812	-0.279446	0.512	0.495	1	1	aminoacyl_tRNA_synthase_complex-interacting_multifunctional_protein_1-like
LOC121424588	0.0903785	-0.281486	0.256	0.284	1	1	elongation_factor_1-delta-like
LOC121425418	0.0947208	-0.305289	0.304	0.326	1	1	V-type_proton_ATPase_subunit_e_2-like
LOC121411305	0.0947675	-0.312175	0.852	0.762	1	1	guanine_nucleotide-binding_protein_G(q)_subunit_alpha-like
LOC121424869	0.0971796	-0.258377	0.41	0.415	1	1	serine/threonine-protein_phosphatase_2A_55_kDa_regulatory_subunit_B_beta_isoform-like
LOC121415564	0.0978833	-0.2761	0.488	0.402	1	1	chromodomain-helicase-DNA-binding_protein_2-like
LOC121411534	0.0981869	-0.288792	0.617	0.587	1	1	eukaryotic_translation_initiation_factor_5B-like
LOC121413873	0.107719	-0.26325	0.229	0.256	1	1	ecdysone-induced_protein_74EF-like
LOC121411576	0.109783	-0.304272	0.551	0.43	1	1	protein_DD3-3-like
LOC121421356	0.110375	-0.276016	0.247	0.27	1	1	28S_ribosomal_protein_S14,_mitochondrial-like
LOC121415190	0.111305	-0.580784	0.461	0.448	1	1	bcl-2-like_protein_2
LOC121418420	0.111417	-0.302187	0.355	0.37	1	1	transmembrane_emp24_domain-containing_protein_10-like
LOC121418830	0.117258	-0.297898	0.298	0.315	1	1	26S_proteasome_regulatory_subunit_4
LOC121421532	0.117673	-0.256674	0.497	0.398	1	1	uncharacterized_LOC121421532
LOC121425126	0.117747	-0.907396	0.476	0.464	1	1	myosin_regulatory_light_chain_12A-like
LOC121429565	0.122278	-0.288188	0.238	0.262	1	1
LOC121415054	0.122708	-0.25584	0.334	0.342	1	1	adenylate_kinase_isoenzyme_6-like
LOC121418586	0.124049	-0.283783	0.605	0.573	1	1	protein_phosphatase_1B-like
LOC121410404	0.12479	-0.31986	0.238	0.261	1	1	protein_polybromo-1-like
LOC121410229	0.126597	-0.332347	0.229	0.254	1	1	uncharacterized_LOC121410229
LOC121413602	0.127432	-0.28666	0.226	0.251	1	1	AT-rich_interactive_domain-containing_protein_1B-like
LOC121411350	0.130404	-0.347493	0.301	0.318	1	1	protogenin_B-like
LOC121431598	0.131591	-0.390709	0.47	0.459	1	1	coiled-coil_domain-containing_protein_6-like
LOC121430246	0.132446	-0.296997	0.331	0.349	1	1	protein_IWS1_homolog
LOC121415222	0.132991	-0.377061	0.289	0.3	1	1	tyrosine-protein_phosphatase_non-receptor_type_9-like
LOC447795	0.133415	-0.262581	0.386	0.323	1	1	notch
LOC121410067	0.133823	-0.396293	0.509	0.41	1	1	ectopic_P_granules_protein_5_homolog
LOC121423679	0.138371	-0.319529	0.361	0.364	1	1	glucosidase_2_subunit_beta-like
LOC121428697	0.142005	-0.303955	0.301	0.317	1	1	TGF-beta_receptor_type-1-like
LOC121413599	0.147504	-0.332293	0.458	0.452	1	1	non-POU_domain-containing_octamer-binding_protein-like
LOC121428830	0.147711	-0.305065	0.539	0.506	1	1	ubiquitin_carboxyl-terminal_hydrolase_isozyme_L5-like
LOC121419438	0.161915	-0.253388	0.292	0.303	1	1	signal_recognition_particle_9_kDa_protein-like
LOC121414112	0.168848	-0.330962	0.28	0.293	1	1	trichohyalin-like
LOC121416464	0.169588	-0.287115	0.34	0.274	1	1	cytochrome_P450_2C15-like
LOC121425475	0.170388	-0.362066	0.392	0.309	1	1	CREB3_regulatory_factor-like
LOC121426098	0.172392	-0.272987	0.235	0.251	1	1	protein_LSM12_homolog_B-like
LOC121425598	0.172612	-0.634389	0.584	0.525	1	1	fibroblast_growth_factor_receptor-like
LOC121418919	0.174431	-0.276206	0.404	0.325	1	1	protein_enabled_homolog
LOC121430679	0.176287	-0.282846	0.31	0.314	1	1	eukaryotic_translation_initiation_factor_2_subunit_1-like
LOC121408832	0.178379	-0.251965	0.392	0.326	1	1	rho_GTPase-activating_protein_26-like
LOC121411498	0.179825	-0.273989	0.346	0.359	1	1	lysine-specific_demethylase_5A-like
LOC121411297	0.179836	-0.308223	0.268	0.287	1	1	disks_large-associated_protein_4-like
LOC121425148	0.183993	-0.328446	0.349	0.358	1	1	uncharacterized_LOC121425148
LOC121411380	0.186235	-0.270444	0.307	0.314	1	1	uncharacterized_LOC121411380
LOC121411954	0.190533	-0.480835	0.491	0.467	1	1	FYVE,_RhoGEF_and_PH_domain-containing_protein_6-like
LOC121418813	0.192393	-0.292307	0.572	0.532	1	1	galectin-8-like
LOC121419051	0.193995	-0.301629	0.554	0.499	1	1	heterogeneous_nuclear_ribonucleoprotein_L-like
LOC121410231	0.199642	-0.477434	0.28	0.28	1	1	glutamyl_aminopeptidase-like
LOC121426068	0.202902	-0.254453	0.419	0.346	1	1	ATP-dependent_translocase_ABCB1-like
LOC121430228	0.202904	-0.36198	0.31	0.317	1	1	cullin-3-like
LOC121410405	0.220086	-0.290124	0.28	0.291	1	1	uncharacterized_LOC121410405
LOC121431423	0.222236	-0.41186	0.298	0.301	1	1	syntenin-1-like
LOC121408695	0.229842	-0.254612	0.328	0.337	1	1	transmembrane_emp24_domain-containing_protein_2-like
LOC121426103	0.231024	-0.305797	0.253	0.263	1	1	serine/threonine-protein_kinase_tousled-like_2
LOC121405836	0.231471	-0.382073	0.268	0.216	1	1	uncharacterized_LOC121405836
LOC121410833	0.234488	-0.318932	0.449	0.431	1	1	KAT8_regulatory_NSL_complex_subunit_1-like
LOC121419232	0.234893	-0.414676	0.256	0.262	1	1	spastin-like
LOC121411406	0.237322	-0.346618	0.476	0.451	1	1	scaffold_attachment_factor_B2-like
LOC121423225	0.238372	-0.462889	0.518	0.483	1	1	putative_RNA-binding_protein_Luc7-like_2
LOC121418348	0.241873	-0.334354	0.419	0.402	1	1	poly_[ADP-ribose]_polymerase_tankyrase-like
LOC121422796	0.244631	-0.276333	0.392	0.386	1	1	serrate_RNA_effector_molecule_homolog
LOC121425710	0.252557	-0.289582	0.256	0.267	1	1	retinoic_acid_receptor_alpha-A-like
LOC121411553	0.257342	-0.708269	0.608	0.55	1	1	uncharacterized_LOC121411553
LOC121410924	0.25806	-0.339899	0.346	0.288	1	1	neuronal_cell_adhesion_molecule-like
LOC121408605	0.280984	-0.280975	0.262	0.271	1	1	TBC1_domain_family_member_10B-like
LOC121427546	0.288445	-0.397677	0.47	0.452	1	1	uncharacterized_LOC121427546
LOC121410590	0.290297	-0.256165	0.304	0.308	1	1	double-stranded_RNA-specific_editase_1-like
LOC121425734	0.312117	-0.286483	0.31	0.315	1	1	transcription_elongation_regulator_1-like
LOC121429247	0.322054	-0.353655	0.386	0.376	1	1	protein_PRRC2C-like
LOC121419243	0.323084	-0.250771	0.274	0.284	1	1	coiled-coil_domain-containing_protein_85C-A-like
LOC121417238	0.325427	-0.250314	0.265	0.274	1	1	protein_phosphatase_inhibitor_2-like
LOC121409142	0.335621	-0.279672	0.316	0.265	1	1	beta-adrenergic_receptor_kinase_2-like
LOC121418778	0.339303	-0.279302	0.461	0.434	1	1	serine/arginine-rich_splicing_factor_6-like
LOC121416136	0.33995	-0.328829	0.431	0.405	1	1	RNA-binding_protein_MEX3B-like
LOC121419910	0.354353	-0.26688	0.364	0.358	1	1	electron_transfer_flavoprotein_subunit_beta-like
LOC121405704	0.357981	-0.349184	0.37	0.359	1	1	serine/threonine-protein_phosphatase_6_regulatory_subunit_3-like
LOC121419115	0.358094	-0.356766	0.343	0.339	1	1	uncharacterized_LOC121419115
LOC121415546	0.362717	-0.313563	0.383	0.368	1	1	asparagine--tRNA_ligase,_cytoplasmic-like
LOC121407964	0.373657	-0.356351	0.44	0.415	1	1	cathepsin_Z-like
LOC121411459	0.381035	-0.306787	0.584	0.542	1	1	inactive_histone-lysine_N-methyltransferase_2E-like
LOC121418647	0.383974	-0.298478	0.611	0.561	1	1	alpha-actinin-like
LOC121422281	0.38491	-0.325464	0.873	0.793	1	1	ATP-dependent_RNA_helicase_dbp2-like
LOC121410754	0.38552	-0.477561	0.283	0.277	1	1	diacylglycerol_kinase_beta-like
LOC121411505	0.386964	-0.285149	0.636	0.563	1	1	ras-related_protein_Rab-8A-like
LOC121408430	0.420665	-0.260902	0.292	0.248	1	1	E3_ubiquitin-protein_ligase_HERC2-like
LOC121432238	0.420689	-0.340851	0.401	0.352	1	1	calcium/calmodulin-dependent_protein_kinase_type_II_subunit_alpha-like
LOC121414150	0.429366	-0.276581	0.62	0.551	1	1	eukaryotic_translation_initiation_factor_1A,_Y-chromosomal-like
LOC121407099	0.436826	-0.265608	0.488	0.456	1	1	RE1-silencing_transcription_factor-like
LOC121407898	0.44086	-0.309032	0.431	0.368	1	1	nuclear_factor_of_activated_T-cells_5-like
LOC121423279	0.446729	-0.272129	0.304	0.301	1	1	luc7-like_protein_3
LOC121408196	0.458801	-0.296018	0.512	0.48	1	1	serine/arginine_repetitive_matrix_protein_2-like
LOC121424483	0.491041	-0.318938	0.38	0.36	1	1	AP-3_complex_subunit_delta-1-like
LOC121418790	0.527104	-0.392981	0.262	0.258	1	1	kinesin_light_chain
LOC121407947	0.534622	-0.257834	0.443	0.418	1	1	terminal_nucleotidyltransferase_4A-like
LOC121422881	0.551878	-0.261648	0.325	0.281	1	1	serine/arginine_repetitive_matrix_protein_2-like
LOC121411767	0.553973	-0.371009	0.768	0.693	1	1	uncharacterized_LOC121411767
LOC121408173	0.584025	-0.692144	0.744	0.607	1	1	nucleoredoxin-like
LOC121408762	0.584597	-0.251583	0.41	0.385	1	1	piwi-like_protein_1
LOC121426341	0.599668	-0.307728	0.497	0.461	1	1	probable_ATP-dependent_RNA_helicase_DDX23
LOC447796	0.604584	-0.328988	0.416	0.39	1	1	G-cadherin
LOC121410795	0.605264	-0.358046	0.325	0.31	1	1	ralA-binding_protein_1-like
LOC121418973	0.606797	-0.250706	0.271	0.265	1	1	ribosome_biogenesis_protein_NOP53-like
LOC121426180	0.614845	-0.305869	0.437	0.374	1	1	1-phosphatidylinositol_4,5-bisphosphate_phosphodiesterase_delta-4-like
LOC121407687	0.617101	-0.261356	0.334	0.322	1	1	guanine_nucleotide-binding_protein_G(s)_subunit_alpha-like
LOC121408796	0.637682	-0.298111	0.482	0.445	1	1	lissencephaly-1_homolog
LOC121423462	0.642143	-0.275698	0.355	0.333	1	1	single-stranded_DNA-binding_protein_3-like
LOC121429772	0.646474	-0.326493	0.422	0.394	1	1	traf2_and_NCK-interacting_protein_kinase-like
LOC121408658	0.663675	-0.272923	0.301	0.274	1	1	ubiquitin_carboxyl-terminal_hydrolase_32-like
LOC121419174	0.675457	-0.268594	0.407	0.354	1	1	RNA-binding_protein_25-like
LOC121408699	0.701593	-0.261402	0.298	0.292	1	1	transmembrane_protein_131-like
LOC121423324	0.711363	-0.345413	0.337	0.309	1	1	frizzled-2-like
LOC121405823	0.71909	-0.314525	0.497	0.446	1	1	hsp90_co-chaperone_Cdc37-like
LOC121418202	0.722516	-0.276573	0.395	0.367	1	1	AT-rich_interactive_domain-containing_protein_4A-like
LOC121408782	0.747097	-0.260589	0.37	0.354	1	1	helicase_domino-like
LOC445810	0.775721	-0.27036	0.268	0.256	1	1	dynamin
LOC121408910	0.798901	-0.261451	0.443	0.395	1	1	dentin_sialophosphoprotein-like
LOC121408116	0.800318	-0.349416	0.422	0.363	1	1	protein_Jumonji-like
LOC121420112	0.805198	-0.29874	0.331	0.318	1	1	uncharacterized_LOC121420112
LOC121427769	0.822597	-0.835167	0.476	0.416	1	1	ATP-dependent_translocase_ABCB1-like
LOC121407695	0.847582	-0.297368	0.25	0.227	1	1	nuclear_factor_of_activated_T-cells_5-like
LOC121418443	0.853266	-0.310429	0.307	0.275	1	1	MAP/microtubule_affinity-regulating_kinase_3-like
LOC121410491	0.86474	-0.262987	0.663	0.589	1	1	gamma-interferon-inducible_lysosomal_thiol_reductase-like
LOC121405894	0.867427	-0.466492	0.298	0.27	1	1	synaptotagmin-1-like
LOC121428589	0.873799	-0.756641	0.259	0.223	1	1	voltage-dependent_calcium_channel_type_A_subunit_alpha-1-like
LOC121422469	0.920137	-0.385226	0.304	0.273	1	1	nucleosome-remodeling_factor_subunit_BPTF-like
LOC121415518	0.924471	-0.285293	0.286	0.259	1	1	casein_kinase_I-like
LOC121419421	0.925836	-0.423156	0.292	0.267	1	1	rho_GTPase-activating_protein_7-like
LOC121410498	0.931757	-0.292023	0.277	0.258	1	1	transcription_factor_E3-like
LOC121423851	0.947822	-0.718408	0.886	0.801	1	1	uncharacterized_LOC121423851
LOC121425891	0.951188	-0.27698	0.265	0.244	1	1	kinesin_heavy_chain
LOC121430068	0.955414	-0.353253	0.416	0.372	1	1	U2_snRNP-associated_SURP_motif-containing_protein-like
LOC121423644	0.964191	-0.28388	0.253	0.238	1	1	RING_finger_protein_11-like
LOC121420408	0.97991	-0.291731	0.38	0.349	1	1	rho_guanine_nucleotide_exchange_factor_12-like
LOC121432004	0.993455	-1.51971	0.322	0.284	1	1	interferon_alpha-inducible_protein_27,_mitochondrial-like
LOC121410964	0.998412	-0.251276	0.485	0.429	1	1	ADP-ribosylation_factor-like_protein_8B-A
LOC121424934	1.13e-218	3.86907	0.932	0.21	2.16e-214	2	myosin_light_chain_kinase,_smooth_muscle-like
LOC446191	1.09e-210	2.88597	0.845	0.143	2.09e-206	2	myosin_heavy_chain
LOC121418904	1.24e-196	2.30792	0.626	0.058	2.36e-192	2	microtubule-associated_protein_futsch-like
LOC121432071	3.61e-166	2.35461	0.697	0.105	6.89e-162	2	titin-like
LOC121421391	1.27e-151	2.09269	0.6	0.081	2.42e-147	2	troponin_T-like
LOC121424948	2.9e-148	3.69785	0.932	0.423	5.53e-144	2	uncharacterized_LOC121424948
LOC121425126	1.45e-146	2.97485	0.939	0.41	2.78e-142	2	myosin_regulatory_light_chain_12A-like
LOC121424881	1.25e-138	3.54066	0.965	0.56	2.38e-134	2	actin,_cytoskeletal
LOC121418502	1.44e-136	2.99306	0.742	0.178	2.75e-132	2	calmodulin
LOC121425834	4.73e-126	2.64611	0.897	0.363	9.04e-122	2	muscle_M-line_assembly_protein_unc-89-like
LOC121414041	1.3e-124	1.57263	0.397	0.034	2.49e-120	2	myophilin-like
LOC121432078	3.83e-123	2.96341	0.8	0.252	7.32e-119	2	titin-like
LOC121407459	1.24e-108	2.73927	0.668	0.168	2.36e-104	2	zinc_finger_protein_SNAI2-like
LOC121416215	6.42e-108	1.19997	0.335	0.026	1.23e-103	2	titin-like
LOC121405576	4.24e-101	1.66969	0.648	0.159	8.11e-97	2	collagen_alpha-2(IX)_chain-like
LOC121431867	1.99e-100	1.83426	0.429	0.059	3.8e-96	2	gelsolin-like_protein_1
LOC121429967	2.6e-98	1.37099	0.526	0.095	4.97e-94	2	uncharacterized_LOC121429967
LOC121418747	1.38e-95	2.80952	0.845	0.409	2.64e-91	2	arginine_kinase-like
LOC121424918	5.55e-85	1.51304	0.681	0.207	1.06e-80	2	striated_muscle_preferentially_expressed_protein_kinase-like
LOC121410978	1.64e-84	1.40748	0.468	0.085	3.13e-80	2	voltage-dependent_L-type_calcium_channel_subunit_alpha-1D-like
LOC121421964	1.45e-82	1.44238	0.503	0.105	2.77e-78	2	titin_homolog
LOC121417517	1.65e-77	2.12786	0.619	0.185	3.15e-73	2	uncharacterized_LOC121417517
LOC121421054	4.46e-75	1.68315	0.823	0.465	8.52e-71	2	troponin_I-like
LOC121418185	1.9e-74	1.44296	0.9	0.643	3.63e-70	2	cell_surface_glycoprotein_1-like
LOC121406279	4.58e-72	1.40989	0.735	0.293	8.74e-68	2	spondin-1-like
LOC121430407	7.48e-69	1.5804	0.603	0.185	1.43e-64	2	protein_unc-80_homolog
LOC121417960	2.3e-68	0.693606	0.297	0.038	4.4e-64	2	uncharacterized_LOC121417960
LOC121406043	3.13e-66	1.4351	0.677	0.265	5.98e-62	2	oleosin_GRP-17-like
LOC121419082	3.63e-65	0.940122	0.323	0.048	6.93e-61	2	sodium/calcium_exchanger_3-like
LOC121428312	1.28e-63	-1.484	0.916	0.977	2.44e-59	2	actin,_cytoskeletal_1A
LOC121415027	6.4e-61	1.40661	0.971	0.865	1.22e-56	2	tropomyosin-like
LOC121410156	1.29e-59	1.35069	0.632	0.236	2.46e-55	2	nucleolar_protein_dao-5-like
LOC121429767	6.25e-59	1.56099	0.69	0.312	1.19e-54	2	diacylglycerol_kinase_delta-like
LOC121411285	9.27e-57	1.19137	0.558	0.185	1.77e-52	2	CUGBP_Elav-like_family_member_3-B
LOC121422981	5.05e-55	1.03404	0.316	0.057	9.64e-51	2	voltage-dependent_T-type_calcium_channel_subunit_alpha-1I-like
LOC121410446	6.73e-55	0.731841	0.365	0.076	1.29e-50	2	metalloproteinase_inhibitor_3-like
LOC121418398	1.77e-54	0.950328	0.377	0.082	3.38e-50	2	protein_BZZ1-like
LOC121410052	9.36e-46	1.13184	0.316	0.069	1.79e-41	2	cadherin-like_and_PC-esterase_domain-containing_protein_1
LOC121426010	1.97e-45	1.16005	0.3	0.063	3.76e-41	2	potassium_voltage-gated_channel_subfamily_H_member_7-like
LOC121426250	3.99e-45	1.06044	0.906	0.623	7.61e-41	2	zinc_metalloproteinase_nas-39-like
LOC121431749	5.21e-45	0.936319	0.458	0.142	9.95e-41	2	synaptopodin_2-like_protein
LOC121406090	1.02e-43	1.25818	0.861	0.636	1.95e-39	2	protein_phosphatase_1_regulatory_subunit_12B-like
LOC121418759	1.14e-43	1.11809	0.61	0.269	2.17e-39	2	protein_piccolo-like
LOC121419035	1.84e-42	1.01802	0.458	0.147	3.51e-38	2	ryanodine_receptor_2-like
LOC121419333	1.23e-41	0.952158	0.445	0.142	2.34e-37	2	pleckstrin_homology_domain-containing_family_H_member_1-like
LOC121413772	3.01e-41	1.00082	0.539	0.207	5.74e-37	2	uncharacterized_LOC121413772
LOC121429627	8.83e-41	1.23055	0.852	0.565	1.69e-36	2	collagen_alpha-5(IV)_chain-like
LOC121418263	9.85e-41	1.39542	0.655	0.328	1.88e-36	2	calmodulin
LOC121418919	6.69e-37	1.10181	0.61	0.301	1.28e-32	2	protein_enabled_homolog
LOC121428011	7.36e-37	1.15683	0.465	0.175	1.41e-32	2	zinc_finger_protein_castor_homolog_1-like
LOC121410924	8.03e-37	1.05251	0.584	0.261	1.53e-32	2	neuronal_cell_adhesion_molecule-like
LOC121425598	1.86e-35	1.19554	0.771	0.503	3.54e-31	2	fibroblast_growth_factor_receptor-like
LOC121418647	1.17e-34	1.01548	0.768	0.543	2.24e-30	2	alpha-actinin-like
LOC121405894	1.38e-33	0.772714	0.545	0.241	2.64e-29	2	synaptotagmin-1-like
LOC121421934	4.15e-33	1.01486	0.548	0.238	7.93e-29	2	supervillin-like
LOC121421553	1.42e-32	-1.10222	0.99	0.995	2.7e-28	2	soma_ferritin-like
LOC121409681	4.55e-32	1.02902	0.494	0.216	8.69e-28	2	histone_acetyltransferase_KAT6B-like
LOC121407519	7.65e-32	0.996849	0.516	0.232	1.46e-27	2	forkhead_box_protein_C2-B-like
LOC121407329	2.53e-31	0.934732	0.642	0.34	4.82e-27	2	dachshund_homolog_1-like
LOC121419389	7.83e-31	-1.15905	0.355	0.681	1.5e-26	2	mRNA_decay_activator_protein_ZFP36L2-A-like
LOC121424363	9.43e-31	0.650128	0.397	0.136	1.8e-26	2	uncharacterized_LOC121424363
LOC121413982	2.05e-30	0.692675	0.368	0.125	3.92e-26	2	uncharacterized_LOC121413982
LOC121416335	3.3e-30	0.784798	0.494	0.212	6.3e-26	2	uncharacterized_LOC121416335
LOC121427695	6.29e-30	0.840831	0.374	0.13	1.2e-25	2	rho_guanine_nucleotide_exchange_factor_10-like
LOC121409056	6.48e-30	1.22495	0.539	0.252	1.24e-25	2	teneurin-3-like
LOC121427213	2.19e-29	0.462264	0.939	0.934	4.19e-25	2	guanine_nucleotide-binding_protein_subunit_beta
LOC121429058	1.42e-28	0.612016	0.265	0.071	2.71e-24	2	uncharacterized_LOC121429058
LOC121421311	6.57e-28	0.739935	0.41	0.163	1.26e-23	2	protein_unc-45_homolog_B-like
LOC121411284	7.9e-28	0.635366	0.31	0.098	1.51e-23	2	CUGBP_Elav-like_family_member_4
LOC121424882	1.26e-27	0.578405	0.258	0.071	2.41e-23	2	BMP-binding_endothelial_regulator_protein-like
LOC121419405	1.84e-27	0.794215	0.6	0.327	3.52e-23	2	cellular_retinoic_acid-binding_protein_1-like
LOC121418255	1.91e-27	0.560037	0.374	0.14	3.65e-23	2	uncharacterized_LOC121418255
LOC121409065	2.55e-27	1.02281	0.606	0.346	4.86e-23	2	calcium-transporting_ATPase_sarcoplasmic/endoplasmic_reticulum_type-like
LOC121428529	3.78e-27	0.788059	0.571	0.285	7.22e-23	2	laminin_subunit_gamma-1-like
LOC121418773	4.39e-27	0.622564	0.555	0.271	8.38e-23	2	fasciculation_and_elongation_protein_zeta-2-like
LOC121419421	8.43e-26	0.901399	0.503	0.242	1.61e-21	2	rho_GTPase-activating_protein_7-like
LOC121407515	1.28e-25	0.86394	0.548	0.288	2.44e-21	2	GDP-mannose_4,6_dehydratase-like
LOC121429798	2.53e-25	0.919157	0.748	0.465	4.82e-21	2	collagen_alpha-5(IV)_chain-like
LOC121424582	6.04e-25	0.589787	0.261	0.079	1.15e-20	2
LOC121416906	3.55e-24	0.724803	0.568	0.295	6.78e-20	2	uncharacterized_LOC121416906
LOC121421982	1.14e-23	0.848788	0.271	0.087	2.18e-19	2	uncharacterized_LOC121421982
LOC121410649	2.74e-23	0.756481	0.619	0.346	5.24e-19	2	uncharacterized_LOC121410649
LOC121430850	8.41e-23	0.842205	0.584	0.332	1.61e-18	2	protein_sprouty_homolog_3-like
LOC121410910	2.17e-22	0.605862	0.842	0.698	4.14e-18	2	endonuclease_8-like_2
LOC121408474	1.23e-21	0.894389	0.739	0.563	2.34e-17	2	RNA-binding_protein_Musashi_homolog_2-like
LOC121421102	1.47e-21	0.709213	0.345	0.143	2.82e-17	2	troponin_I-like
LOC121416938	3.42e-21	-1.17171	0.419	0.622	6.53e-17	2	60S_ribosomal_protein_L12-like
LOC121427346	6.13e-21	0.435924	0.4	0.176	1.17e-16	2	tubulin_beta_chain-like
LOC121419686	7.15e-21	0.692947	0.5	0.255	1.37e-16	2	transcription_factor_GATA-3-like
LOC446219	1.02e-20	0.640483	0.3	0.112	1.95e-16	2	delta_protein
LOC121410118	1.02e-20	0.797505	0.371	0.159	1.95e-16	2	IQ_motif_and_SEC7_domain-containing_protein_1-like
LOC121419247	1.29e-20	0.717619	0.461	0.22	2.47e-16	2	regulator_of_G-protein_signaling_7-like
LOC121417887	1.73e-20	0.941522	0.294	0.112	3.3e-16	2	uncharacterized_LOC121417887
LOC121430536	4.97e-20	-0.751595	0.5	0.685	9.48e-16	2	myosin_regulatory_light_chain_2,_smooth_muscle_minor_isoform-like
LOC121418309	6.12e-20	0.575566	0.413	0.19	1.17e-15	2	1-phosphatidylinositol_4,5-bisphosphate_phosphodiesterase_beta-4-like
LOC121419032	7.52e-20	-0.605836	0.923	0.954	1.44e-15	2	cofilin-like
LOC121419258	7.52e-20	0.580473	0.274	0.1	1.44e-15	2	inactive_tyrosine-protein_kinase_7-like
LOC121407319	1.11e-19	0.939703	0.474	0.247	2.13e-15	2	dachshund_homolog_1-like
LOC121410097	1.37e-19	0.436888	0.297	0.113	2.62e-15	2	rab_GDP_dissociation_inhibitor_alpha-like
LOC121410472	2.33e-19	0.744761	0.435	0.213	4.46e-15	2	plexin-A4-like
LOC121428662	2.68e-19	0.749637	0.429	0.209	5.13e-15	2	uncharacterized_LOC121428662
LOC121426230	2.96e-19	0.35439	0.258	0.086	5.65e-15	2	cyclin-dependent_kinase_5_activator_1-like
LOC121406326	5.1e-19	0.462764	0.268	0.098	9.74e-15	2	CUGBP_Elav-like_family_member_1
LOC121429735	5.76e-19	0.622592	0.729	0.561	1.1e-14	2	14-3-3_protein_zeta/delta-like
LOC121415652	5.91e-19	0.60601	0.648	0.403	1.13e-14	2	microtubule-associated_protein_1B-like
LOC121426295	6.99e-19	0.46302	0.452	0.211	1.34e-14	2	voltage-dependent_L-type_calcium_channel_subunit_beta-1-like
LOC121405789	3.55e-18	-1.95505	0.097	0.322	6.79e-14	2	uncharacterized_LOC121405789
LOC121422426	6.24e-18	0.432783	0.339	0.144	1.19e-13	2	matrix-remodeling-associated_protein_7-like
LOC121422192	1.02e-17	0.591581	0.413	0.2	1.95e-13	2	RNA_binding_protein_fox-1_homolog_3-like
LOC121423947	1.04e-17	0.506154	0.332	0.142	1.99e-13	2	zinc_finger_SWIM_domain-containing_protein_5-like
LOC121414524	1.62e-17	-1.16087	0.135	0.354	3.1e-13	2	tubulin_alpha-1_chain-like
LOC121429391	1.92e-17	0.473051	0.323	0.138	3.67e-13	2	serine/threonine-protein_phosphatase_2A_regulatory_subunit_B''_subunit_beta-like
LOC121424968	3.53e-17	1.01031	0.565	0.36	6.75e-13	2	uncharacterized_LOC121424968
LOC121429618	4.05e-17	0.54298	0.532	0.311	7.73e-13	2	glycogenin-1-like
LOC121428859	5.59e-17	0.930295	0.561	0.346	1.07e-12	2	hemicentin-1-like
LOC446166	1.41e-16	0.745074	0.6	0.391	2.69e-12	2	embryonic_blastocoelar_extracellular_matrix_protein_precursor
LOC121410994	1.49e-16	0.559135	0.274	0.106	2.85e-12	2	mucin-17-like
LOC121412403	1.81e-16	0.640232	0.506	0.283	3.46e-12	2	extracellular_matrix_protein_3
LOC121409125	3.52e-16	0.526143	0.377	0.187	6.71e-12	2	argininosuccinate_lyase-like
LOC121411576	4.38e-16	-1.04306	0.239	0.468	8.36e-12	2	protein_DD3-3-like
LOC121418883	6.32e-16	0.714138	0.661	0.456	1.21e-11	2	spectrin_beta_chain,_non-erythrocytic_1-like
LOC121407609	6.33e-16	0.580313	0.313	0.136	1.21e-11	2	FH1/FH2_domain-containing_protein_3-like
LOC121416505	8.69e-16	0.561793	0.423	0.222	1.66e-11	2	calponin-3-like
LOC121431737	1.02e-15	0.546648	0.655	0.413	1.95e-11	2	uncharacterized_LOC121431737
LOC121422505	1.53e-15	-1.57361	0.248	0.441	2.93e-11	2	uncharacterized_LOC121422505
LOC121422897	3.42e-15	0.623512	0.587	0.382	6.53e-11	2	nuclear_distribution_protein_nudE-like_1-A
LOC121421110	4.2e-15	-0.371089	0.971	0.982	8.03e-11	2	60S_ribosomal_protein_L27a-like
LOC121431809	6.46e-15	0.481182	0.406	0.212	1.23e-10	2	ankyrin-2-like
LOC121423744	7.73e-15	-0.901177	0.081	0.274	1.48e-10	2	Krueppel-like_factor_5
LOC121416317	9.34e-15	0.436892	0.252	0.102	1.78e-10	2	RNA-binding_protein_38-like
LOC121428770	1.05e-14	0.678471	0.335	0.163	2e-10	2	collagen_alpha-1(I)_chain-like
LOC121418570	1.53e-14	0.552424	0.3	0.133	2.92e-10	2	calcium-independent_protein_kinase_C-like
LOC121417195	1.61e-14	0.671876	0.455	0.261	3.07e-10	2	dihydropyrimidinase-like
LOC121418132	3.76e-14	0.717233	0.368	0.188	7.19e-10	2	homeobox_protein_Meis1-like
LOC121405827	5.74e-14	-0.892632	0.161	0.369	1.1e-09	2	G1/S-specific_cyclin-D1-like
LOC121423603	7.69e-14	0.431219	0.535	0.319	1.47e-09	2	lateral_signaling_target_protein_2_homolog
LOC121428005	9.82e-14	0.415147	0.274	0.119	1.88e-09	2	rap1_GTPase-activating_protein_1-like
LOC121408547	9.97e-14	0.758707	0.323	0.157	1.91e-09	2	myosin_heavy_chain,_striated_muscle-like
LOC121415848	1.06e-13	0.582135	0.729	0.561	2.03e-09	2	adenylyl_cyclase-associated_protein_1-like
LOC121423324	1.25e-13	0.672767	0.481	0.293	2.39e-09	2	frizzled-2-like
LOC121420114	1.56e-13	0.465066	0.519	0.319	2.98e-09	2	amyloid-like_protein_1
LOC121411587	1.97e-13	0.565669	0.548	0.353	3.77e-09	2	filamin-A-like
LOC121423514	2.8e-13	0.662068	0.316	0.157	5.34e-09	2	integumentary_mucin_C.1-like
LOC121411305	4.78e-13	0.498815	0.839	0.764	9.13e-09	2	guanine_nucleotide-binding_protein_G(q)_subunit_alpha-like
LOC121426200	7.24e-13	0.538588	0.616	0.449	1.38e-08	2	RNA-binding_motif,_single-stranded-interacting_protein_2-like
LOC121427950	9.11e-13	0.635004	0.765	0.566	1.74e-08	2	uncharacterized_LOC121427950
LOC121427642	1.4e-12	0.358001	0.394	0.208	2.68e-08	2	uncharacterized_LOC121427642
LOC121428589	1.51e-12	0.653193	0.387	0.208	2.89e-08	2	voltage-dependent_calcium_channel_type_A_subunit_alpha-1-like
LOC121430751	1.9e-12	0.416266	0.271	0.122	3.63e-08	2	MAP/microtubule_affinity-regulating_kinase_4-like
LOC121420211	2.5e-12	-1.02917	0.174	0.359	4.78e-08	2	uncharacterized_LOC121420211
LOC121426932	4.16e-12	0.821089	0.323	0.167	7.95e-08	2	reversion-inducing_cysteine-rich_protein_with_Kazal_motifs-like
LOC121414279	4.81e-12	0.806901	0.323	0.167	9.19e-08	2	transient_receptor_potential_cation_channel_subfamily_A_member_1_homolog
LOC121418695	5.31e-12	0.637513	0.652	0.463	1.02e-07	2	calpain-A-like
LOC121427612	5.5e-12	-1.88743	0.171	0.336	1.05e-07	2	apolipoprotein_D-like
LOC121420938	7.26e-12	-0.510949	0.7	0.801	1.39e-07	2	40S_ribosomal_protein_S16-like
LOC121416984	7.64e-12	0.645775	0.497	0.325	1.46e-07	2	uncharacterized_LOC121416984
LOC121411841	9.77e-12	0.574067	0.365	0.196	1.87e-07	2	E3_ubiquitin-protein_ligase_PDZRN3-B-like
LOC121411532	1e-11	0.428429	0.287	0.138	1.91e-07	2	cAMP-regulated_phosphoprotein_21-like
LOC121431979	1.19e-11	-1.84685	0.161	0.326	2.28e-07	2	cell_wall_protein_IFF6-like
LOC446174	1.22e-11	0.520902	0.3	0.154	2.34e-07	2	beta-C_integrin_subunit
LOC121411954	1.6e-11	0.71028	0.616	0.453	3.05e-07	2	FYVE,_RhoGEF_and_PH_domain-containing_protein_6-like
LOC121421046	1.63e-11	0.523805	0.584	0.384	3.12e-07	2	tetraspanin-6-like
LOC121431621	3e-11	0.301414	0.865	0.63	5.73e-07	2	SPARC-like
LOC121411057	3.69e-11	0.601101	0.365	0.205	7.04e-07	2	neogenin-like
LOC121411575	4e-11	-0.875122	0.094	0.252	7.64e-07	2	protein_DD3-3-like
LOC121430765	4.05e-11	0.268309	0.274	0.131	7.73e-07	2	regulator_of_G-protein_signaling_20-like
LOC121422410	4.18e-11	-0.432383	0.713	0.809	7.98e-07	2	actin-related_protein_2/3_complex_subunit_1A-like
LOC121428489	5.02e-11	-0.581536	0.313	0.484	9.59e-07	2	nuclear_receptor_subfamily_5_group_A_member_2-like
LOC121418303	5.78e-11	0.664211	0.4	0.236	1.1e-06	2	kinesin-like_protein_KIF26B
LOC121431963	7.43e-11	0.459761	0.403	0.238	1.42e-06	2	PDZ_and_LIM_domain_protein_5-like
LOC121423908	7.47e-11	0.48345	0.265	0.129	1.43e-06	2	tyrosine-protein_kinase_ZAP-70-like
LOC121418813	8.6e-11	0.449051	0.674	0.52	1.64e-06	2	galectin-8-like
LOC121407357	9e-11	0.598474	0.39	0.234	1.72e-06	2	ATP-dependent_RNA_helicase_DDX1-like
LOC121411316	9.07e-11	-0.597017	0.216	0.379	1.73e-06	2	transketolase-like
LOC121407089	1.1e-10	0.363942	0.432	0.253	2.11e-06	2	cysteine_and_histidine-rich_protein_1-like
LOC121430120	1.11e-10	0.529022	0.255	0.123	2.13e-06	2	anosmin-1-like
LOC121406953	1.71e-10	-0.585569	0.781	0.849	3.27e-06	2
LOC121416207	1.72e-10	0.621377	0.555	0.395	3.28e-06	2	tubulin_beta_chain-like
LOC121407131	1.88e-10	0.374741	0.835	0.775	3.59e-06	2	60S_ribosomal_protein_L14-like
LOC121420101	1.95e-10	0.519754	0.377	0.215	3.72e-06	2	roundabout_homolog_1-like
LOC121431611	2.28e-10	-0.611673	0.103	0.265	4.35e-06	2	gelsolin-like_protein_2
LOC121412103	2.49e-10	0.417983	0.484	0.311	4.76e-06	2	protein_eyes_shut-like
LOC121425564	2.62e-10	0.386834	0.368	0.205	5e-06	2	arf-GAP_with_SH3_domain,_ANK_repeat_and_PH_domain-containing_protein_1-like
LOC447795	3.49e-10	0.840089	0.481	0.313	6.67e-06	2	notch
LOC121427468	3.85e-10	-0.668944	0.568	0.662	7.35e-06	2	tubulin_beta_chain-like
LOC121416811	4.05e-10	0.400014	0.406	0.242	7.74e-06	2	isocitrate_dehydrogenase_[NADP]_cytoplasmic-like
LOC121414540	5.02e-10	0.405305	0.313	0.171	9.6e-06	2	uncharacterized_LOC121414540
LOC121410199	6.91e-10	0.483568	0.503	0.334	1.32e-05	2	laminin_subunit_beta-1-like
LOC121423580	7.8e-10	0.508708	0.458	0.293	1.49e-05	2	NPC_intracellular_cholesterol_transporter_1-like
LOC121431701	8.23e-10	-1.40077	0.213	0.359	1.57e-05	2	S-crystallin_SL11-like
LOC121407957	9.97e-10	0.365539	0.823	0.727	1.9e-05	2	septin-7-like
LOC121431099	1.07e-09	0.504061	0.526	0.358	2.03e-05	2	protein_4.1-like
LOC121430760	1.08e-09	-1.6811	0.135	0.283	2.06e-05	2	actin_CyI,_cytoplasmic-like
LOC121410607	1.09e-09	0.352562	0.823	0.747	2.08e-05	2	high_mobility_group-T_protein-like
LOC121415124	1.16e-09	-0.633572	0.245	0.398	2.22e-05	2	uncharacterized_LOC121415124
LOC121407990	1.41e-09	0.391928	0.716	0.588	2.68e-05	2	NEDD8
LOC121410354	2.2e-09	0.400545	0.368	0.215	4.2e-05	2	thrombospondin_type-1_domain-containing_protein_7A-like
LOC121418484	2.75e-09	0.602171	0.268	0.144	5.25e-05	2	RNA-binding_protein_Nova-2-like
LOC121415367	3.44e-09	-2.45607	0.313	0.442	6.58e-05	2	arylsulfatase-like
LOC121408340	3.49e-09	-0.643482	0.768	0.832	6.66e-05	2	CCAAT/enhancer-binding_protein_alpha-like
LOC121410755	4.65e-09	0.444521	0.352	0.203	8.88e-05	2	uncharacterized_LOC121410755
LOC121429469	5.98e-09	0.347052	0.277	0.147	0.000114217	2	cAMP-dependent_protein_kinase_catalytic_subunit_PRKX-like
LOC121424846	6.13e-09	-0.477766	0.223	0.377	0.000117107	2	drebrin-like_protein_B
LOC121423610	6.86e-09	0.250416	0.329	0.181	0.000131086	2	lateral_signaling_target_protein_2_homolog
LOC121430748	7.71e-09	0.53311	0.426	0.273	0.000147291	2	focal_adhesion_kinase_1-like
LOC121429703	7.92e-09	0.45411	0.403	0.256	0.000151323	2	eukaryotic_translation_initiation_factor_2A-like
LOC121413554	8.24e-09	0.426743	0.29	0.162	0.000157444	2	uncharacterized_LOC121413554
LOC121422280	8.75e-09	0.558228	0.339	0.202	0.000167147	2	leucine-rich_repeat-containing_protein_45-like
LOC121427769	9.37e-09	-1.14464	0.297	0.438	0.000178936	2	ATP-dependent_translocase_ABCB1-like
LOC121410589	1.19e-08	-0.551915	0.119	0.258	0.000226492	2	ETS_domain-containing_protein_Elk-3-like
LOC121428399	1.4e-08	-0.879855	0.461	0.586	0.000267894	2	actin_CyI,_cytoplasmic
LOC121424356	1.41e-08	0.412365	0.326	0.191	0.000268667	2	triple_functional_domain_protein-like
LOC121429286	1.42e-08	0.45104	0.5	0.346	0.00027089	2	uncharacterized_LOC121429286
LOC121425133	1.45e-08	0.362855	0.506	0.347	0.000276241	2	uncharacterized_LOC121425133
LOC121423851	1.79e-08	0.628524	0.91	0.799	0.000341822	2	uncharacterized_LOC121423851
LOC121418654	2.41e-08	0.461444	0.423	0.275	0.000460981	2	serum_response_factor-like
LOC121418929	2.56e-08	-0.913901	0.219	0.364	0.000488171	2	circularly_permutated_Ras_protein_1-like
LOC121426180	2.99e-08	0.574166	0.5	0.367	0.000570364	2	1-phosphatidylinositol_4,5-bisphosphate_phosphodiesterase_delta-4-like
LOC121431739	3e-08	0.45313	0.355	0.217	0.000573751	2	methylcytosine_dioxygenase_TET3-like
LOC121410251	3.11e-08	0.397435	0.503	0.344	0.000594158	2	transcription_factor_12-like
LOC121422346	4.34e-08	0.392225	0.435	0.283	0.000828644	2	cytohesin-1-like
LOC121430820	4.39e-08	0.507593	0.306	0.183	0.000837676	2	laminin_subunit_alpha-like
LOC121409705	4.41e-08	-0.567492	0.129	0.261	0.000843175	2	peptide_methionine_sulfoxide_reductase-like
LOC121415161	4.45e-08	-0.481163	0.623	0.715	0.000849761	2	receptor_expression-enhancing_protein_5-like
LOC121424097	5.49e-08	0.426524	0.348	0.207	0.00104842	2	uncharacterized_LOC121424097
LOC121428983	5.91e-08	-1.02413	0.49	0.607	0.00112933	2	uncharacterized_LOC121428983
LOC121410405	5.91e-08	0.381638	0.416	0.275	0.0011296	2	uncharacterized_LOC121410405
LOC121415785	6.27e-08	-0.565102	0.41	0.526	0.00119765	2	polyubiquitin-C
LOC121430103	6.55e-08	0.287158	0.268	0.144	0.00125029	2	LIM_and_senescent_cell_antigen-like-containing_domain_protein_1
LOC121423867	7.14e-08	-0.613048	0.319	0.442	0.00136365	2	polypyrimidine_tract-binding_protein_1-like
LOC121422594	7.71e-08	0.284886	0.387	0.235	0.0014731	2	methyltransferase-like_protein_27
LOC121410554	8.22e-08	0.379221	0.332	0.199	0.00156929	2	cold_shock_domain-containing_protein_E1-like
LOC121431399	8.38e-08	0.455151	0.523	0.394	0.00160015	2	protein_extra-macrochaetae-like
LOC121415634	1.14e-07	-0.732609	0.142	0.262	0.00218409	2	glutamate_receptor_3-like
LOC121418905	1.15e-07	0.282732	0.29	0.167	0.0021874	2	uncharacterized_LOC121418905
LOC121410666	1.23e-07	-0.481278	0.752	0.835	0.00235825	2	protein_BTG1-like
LOC121424852	1.51e-07	0.315754	0.313	0.187	0.00288685	2	bifunctional_UDP-N-acetylglucosamine_2-epimerase/N-acetylmannosamine_kinase-like
LOC121407392	1.53e-07	-0.560706	0.148	0.277	0.00291277	2	subtilisin-chymotrypsin_inhibitor-2B-like
LOC121411537	1.62e-07	0.351799	0.297	0.174	0.00310199	2	zinc_finger_E-box-binding_homeobox_2-like
LOC121422482	1.92e-07	0.311279	0.452	0.304	0.00366666	2	BTB/POZ_domain-containing_protein_KCTD5-like
LOC121411823	2.05e-07	0.32508	0.381	0.243	0.00391346	2	constitutive_coactivator_of_PPAR-gamma-like_protein_1_homolog
LOC121410275	2.17e-07	0.323121	0.265	0.147	0.00414508	2	mucin-17-like
LOC121432038	2.21e-07	0.270911	0.358	0.219	0.00421199	2	atrophin-1-like
LOC121430776	2.26e-07	0.416765	0.455	0.317	0.00431131	2	serine/threonine-protein_kinase_Sgk1-like
LOC121405814	2.43e-07	0.398331	0.406	0.268	0.00464789	2	anti-apoptotic_protein_NR13-like
LOC121429138	2.63e-07	-0.685138	0.719	0.77	0.00502997	2	glutamine_synthetase-like
LOC121420518	2.65e-07	-0.369754	0.181	0.317	0.00505858	2	40S_ribosomal_protein_S25-like
LOC121410527	2.78e-07	0.306768	0.352	0.22	0.00530685	2	peptide_methionine_sulfoxide_reductase_MsrB-like
LOC121423143	3.19e-07	-0.569297	0.358	0.492	0.00609783	2	fascin-like
LOC121415910	3.44e-07	-0.695155	0.181	0.306	0.00657539	2	uncharacterized_LOC121415910
LOC121411350	3.5e-07	0.464965	0.445	0.301	0.00668491	2	protogenin_B-like
LOC121431818	3.97e-07	-0.550171	0.158	0.278	0.00757956	2	uncharacterized_LOC121431818
LOC121426346	4.12e-07	0.447084	0.294	0.179	0.00786899	2	integrin_alpha-6-like
LOC121429694	4.2e-07	0.334212	0.519	0.372	0.00803094	2	disks_large_homolog_1-like
LOC121410552	4.74e-07	0.429618	0.477	0.334	0.00904919	2	activin_receptor_type-2A-like
LOC121424943	5.85e-07	0.271664	0.619	0.468	0.0111719	2	G_protein-coupled_receptor_kinase_5-like
LOC121411083	6.19e-07	0.357036	0.603	0.46	0.0118192	2	SRSF_protein_kinase_3-like
LOC121407947	6.56e-07	0.425545	0.535	0.408	0.0125352	2	terminal_nucleotidyltransferase_4A-like
LOC121430477	8.29e-07	0.267237	0.255	0.144	0.0158362	2	uncharacterized_LOC121430477
LOC121410766	8.48e-07	0.397925	0.371	0.249	0.0161874	2	AP-3_complex_subunit_sigma-1-like
LOC121410360	8.89e-07	0.328694	0.274	0.16	0.0169851	2	multiple_epidermal_growth_factor-like_domains_protein_11
LOC121410754	8.92e-07	0.450871	0.394	0.264	0.0170451	2	diacylglycerol_kinase_beta-like
LOC121406199	9.43e-07	-0.465068	0.581	0.656	0.018017	2	cryptochrome-1-like
LOC121425696	9.57e-07	0.406569	0.523	0.395	0.0182751	2	uncharacterized_LOC121425696
LOC121407826	1.06e-06	-0.553128	0.158	0.276	0.0202154	2	tubulin_beta_chain-like
LOC121428577	1.07e-06	-0.473542	0.184	0.293	0.0205144	2	cell_death_protein_3-like
LOC121419177	1.22e-06	0.322755	0.277	0.165	0.0233948	2	uncharacterized_LOC121419177
LOC121417027	1.26e-06	-1.68874	0.177	0.28	0.0241171	2	uncharacterized_LOC121417027
LOC121424308	1.43e-06	0.269855	0.255	0.149	0.0273243	2	trans-1,2-dihydrobenzene-1,2-diol_dehydrogenase-like
LOC121431887	1.6e-06	-0.509099	0.248	0.365	0.0305048	2	S-crystallin_SL11-like
LOC121426202	1.91e-06	0.326943	0.252	0.148	0.036527	2	ras-related_protein_M-Ras-like
LOC121419008	1.96e-06	-0.42359	0.352	0.466	0.0374973	2	calmodulin-beta
LOC121430149	2.01e-06	0.308813	0.726	0.628	0.038401	2	glypican-6-like
LOC121422718	2.5e-06	-0.463376	0.742	0.805	0.0476837	2	cyclic_AMP-dependent_transcription_factor_ATF-4-like
LOC121419455	2.63e-06	0.354565	0.368	0.246	0.0502952	2	uncharacterized_LOC121419455
LOC121409048	2.74e-06	0.303933	0.268	0.16	0.0522995	2	fatty_acid-binding_protein,_heart-like
LOC121428697	2.81e-06	0.406046	0.432	0.302	0.0537007	2	TGF-beta_receptor_type-1-like
LOC121410870	2.98e-06	-0.93463	0.384	0.497	0.0569739	2	procathepsin_L-like
LOC121411556	3.09e-06	-0.621642	0.665	0.728	0.0589424	2	thyrotroph_embryonic_factor-like
LOC121425727	3.18e-06	0.369247	0.577	0.443	0.0606474	2	uncharacterized_LOC121425727
LOC121410168	3.26e-06	0.434526	0.368	0.247	0.062316	2	sodium-_and_chloride-dependent_GABA_transporter_1-like
LOC121407001	3.27e-06	0.274686	0.365	0.238	0.0624188	2	uncharacterized_LOC121407001
LOC121425710	3.35e-06	0.422019	0.374	0.253	0.063916	2	retinoic_acid_receptor_alpha-A-like
LOC121411238	3.66e-06	0.384456	0.381	0.259	0.0699074	2	GTP-binding_protein_Rheb-like
LOC121410380	3.71e-06	0.272092	0.419	0.284	0.0709431	2	LIM_and_SH3_domain_protein_Lasp-like
LOC121428758	3.89e-06	-0.584614	0.465	0.544	0.074228	2	peroxiredoxin-6-like
LOC121428463	4.17e-06	0.336563	0.465	0.327	0.0797155	2	ras_GTPase-activating_protein_nGAP-like
LOC121406261	4.68e-06	0.267202	0.474	0.345	0.0893535	2	uncharacterized_LOC121406261
LOC121411391	5.15e-06	0.535576	0.435	0.322	0.0982779	2	epoxide_hydrolase_3-like
LOC121423785	5.44e-06	0.295758	0.455	0.322	0.103957	2	Krueppel-like_factor_6
LOC121431800	5.69e-06	-0.399583	0.832	0.839	0.108583	2	histone_H2A.V
LOC121424436	5.96e-06	0.482724	0.594	0.487	0.113897	2	sodium-_and_chloride-dependent_glycine_transporter_1-like
LOC121430114	6.83e-06	0.280239	0.258	0.154	0.130502	2	beta-arrestin-1-like
LOC121421513	6.97e-06	-0.536068	0.381	0.507	0.133098	2	tetraspanin-18-like
LOC121423262	7.02e-06	0.391626	0.461	0.337	0.134069	2	chromobox_protein_homolog_8-like
LOC121407269	7.59e-06	0.333888	0.39	0.268	0.14505	2	uncharacterized_LOC121407269
LOC121427394	8.01e-06	0.395593	0.332	0.218	0.152961	2	segment_polarity_protein_dishevelled_homolog_DVL-3-like
LOC121423729	9.53e-06	0.318551	0.626	0.505	0.181919	2	muscle-specific_protein_20-like
LOC121411331	9.84e-06	0.294597	0.255	0.154	0.188011	2	dystroglycan-like
LOC121411934	9.91e-06	0.429033	0.452	0.327	0.189232	2	cytoplasmic_dynein_1_intermediate_chain_2-like
LOC121428497	1.15e-05	-0.318849	0.187	0.296	0.21892	2	nucleolar_protein_dao-5-like
LOC121410715	1.23e-05	-0.452905	0.294	0.392	0.235703	2	calcium-binding_protein_P-like
LOC121414262	1.25e-05	0.446297	0.635	0.544	0.238744	2	uncharacterized_LOC121414262
LOC121420028	1.25e-05	0.320887	0.255	0.155	0.239272	2	serine/arginine_repetitive_matrix_protein_1-like
LOC121431717	1.34e-05	0.321237	0.439	0.317	0.256111	2	zinc_finger_SWIM_domain-containing_protein_8-like
LOC121429984	1.42e-05	-0.488097	0.497	0.579	0.270486	2	lysosome-associated_membrane_glycoprotein_1-like
LOC121424966	1.44e-05	0.346264	0.284	0.182	0.274136	2	uncharacterized_LOC121424966
LOC121429732	1.6e-05	0.25618	0.448	0.309	0.304891	2	transcriptional_coactivator_YAP1-B-like
LOC121422183	1.82e-05	-0.379336	0.319	0.432	0.347346	2	myosin-10-like
LOC121411017	1.82e-05	0.483214	0.3	0.203	0.347869	2	plasma_membrane_calcium-transporting_ATPase_4-like
LOC121418409	1.93e-05	0.298535	0.306	0.199	0.369505	2	serine/threonine-protein_kinase_MRCK_alpha-like
LOC121415222	2.26e-05	0.336994	0.403	0.287	0.431643	2	tyrosine-protein_phosphatase_non-receptor_type_9-like
LOC121418340	2.26e-05	-0.480554	0.484	0.553	0.43245	2	NPC_intracellular_cholesterol_transporter_2_homolog_a-like
LOC121408654	2.3e-05	0.404702	0.542	0.414	0.439451	2	ubinuclein-2-like
LOC121422311	2.51e-05	0.32473	0.477	0.357	0.479623	2	casein_kinase_I-like
LOC121430677	2.61e-05	0.36392	0.374	0.266	0.498602	2	myc_protein-like
LOC121410368	2.68e-05	0.41939	0.7	0.563	0.512627	2	talin-1-like
LOC121409225	2.71e-05	0.267358	0.474	0.354	0.518478	2	syntaxin-like
LOC121420173	3.11e-05	-0.493245	0.219	0.316	0.593735	2	uncharacterized_LOC121420173
LOC121432076	3.17e-05	0.259953	0.316	0.209	0.605927	2	glutamate_dehydrogenase,_mitochondrial-like
LOC121431668	3.31e-05	0.283195	0.41	0.296	0.632215	2	protein_bicaudal_C_homolog_1-B-like
LOC121408757	3.56e-05	-0.466901	0.21	0.302	0.679671	2	fructose-bisphosphate_aldolase,_muscle_type-like
LOC121409131	3.78e-05	0.299813	0.352	0.242	0.722029	2	serine/threonine-protein_kinase_TAO1-like
LOC121408139	3.82e-05	0.261971	0.681	0.602	0.729596	2	proteasome_subunit_beta_type-5-like
LOC121419157	5.51e-05	-0.753704	0.229	0.326	1	2	cytochrome_P450_3A6-like
LOC121418890	5.6e-05	0.328551	0.303	0.205	1	2	homeobox_protein_SIX6-like
LOC121426068	5.87e-05	0.342166	0.442	0.344	1	2	ATP-dependent_translocase_ABCB1-like
LOC121427842	5.87e-05	-0.295065	0.319	0.426	1	2	F-actin-capping_protein_subunit_beta-like
LOC121426050	6.4e-05	-0.449211	0.181	0.277	1	2	serine/threonine-protein_kinase_17A-like
LOC121425419	6.6e-05	0.274577	0.681	0.595	1	2	casein_kinase_I-like
LOC121408564	6.88e-05	0.308379	0.677	0.559	1	2	large_neutral_amino_acids_transporter_small_subunit_4-like
LOC121405875	7.15e-05	0.459469	0.49	0.387	1	2	F-actin-monooxygenase_MICAL3-like
LOC121408173	7.98e-05	-0.497734	0.535	0.632	1	2	nucleoredoxin-like
LOC121411446	8e-05	0.271012	0.345	0.24	1	2	testin-like
LOC121408055	8.08e-05	0.291384	0.655	0.577	1	2	core-binding_factor_subunit_beta-like
LOC121420998	8.17e-05	-0.439988	0.377	0.46	1	2	nucleosome_assembly_protein_1-like_1
LOC121405697	8.41e-05	0.448266	0.552	0.442	1	2	anoctamin-4-like
LOC121419306	8.96e-05	0.432517	0.445	0.345	1	2	uncharacterized_LOC121419306
LOC121410231	9.09e-05	0.281482	0.374	0.269	1	2	glutamyl_aminopeptidase-like
LOC121429484	9.51e-05	0.387733	0.345	0.243	1	2	dedicator_of_cytokinesis_protein_9-like
LOC121418443	9.57e-05	0.289672	0.377	0.267	1	2	MAP/microtubule_affinity-regulating_kinase_3-like
LOC121411318	9.83e-05	0.42863	0.326	0.232	1	2	rho_guanine_nucleotide_exchange_factor_3-like
LOC121420380	9.94e-05	-0.336495	0.568	0.653	1	2	protein_BTG3-like
LOC121411357	0.000104237	0.305394	0.371	0.266	1	2	uncharacterized_LOC121411357
LOC121413919	0.000107641	0.292059	0.526	0.419	1	2	protein_held_out_wings-like
LOC121423305	0.000116917	0.301889	0.535	0.419	1	2	suppressor_of_cytokine_signaling_2-like
LOC121418486	0.000118376	0.300176	0.319	0.218	1	2	RNA-binding_protein_Nova-1-like
LOC121410794	0.00011977	-0.255728	0.729	0.81	1	2	chromobox_protein_homolog_1-like
LOC121415660	0.00014075	-0.358383	0.503	0.584	1	2	activated_RNA_polymerase_II_transcriptional_coactivator_p15-like
LOC121430479	0.000144239	0.284243	0.319	0.222	1	2	transcription_factor_21-like
LOC121407400	0.000152219	0.396084	0.539	0.441	1	2	apoptotic_chromatin_condensation_inducer_in_the_nucleus-like
LOC121424774	0.000153334	0.318514	0.535	0.421	1	2	RING_finger_protein_44-like
LOC121423170	0.000162313	-0.554422	0.594	0.633	1	2	CD63_antigen-like
LOC121422780	0.000170079	-0.392381	0.513	0.575	1	2	myosin-11-like
LOC121422319	0.000176813	-0.395024	0.558	0.607	1	2	probable_serine_incorporator
LOC121411709	0.000177991	-0.300543	0.539	0.609	1	2	uncharacterized_LOC121411709
LOC121422455	0.000184744	0.349011	0.39	0.291	1	2	myosin_phosphatase_Rho-interacting_protein-like
LOC121410934	0.000188785	0.31319	0.484	0.362	1	2	protein_LMBR1L-like
LOC121430732	0.000193013	-0.381042	0.277	0.359	1	2	probable_protein_phosphatase_2C_21
LOC121407468	0.000201139	-0.333303	0.297	0.378	1	2	Golgi_apparatus_protein_1-like
LOC121415035	0.000215648	0.336416	0.374	0.279	1	2	rho_guanine_nucleotide_exchange_factor_18-like
LOC121415420	0.000221693	0.37865	0.29	0.202	1	2	zinc_finger_protein_608-like
LOC121419262	0.000229381	0.264415	0.6	0.502	1	2	Golgi_resident_protein_GCP60-like
LOC121405722	0.00024498	-0.351869	0.284	0.373	1	2	src_substrate_cortactin-like
LOC121419271	0.000254214	-0.412191	0.348	0.442	1	2	cell_division_control_protein_42_homolog
LOC121408955	0.000268486	0.304017	0.484	0.385	1	2	tricarboxylate_transport_protein_B,_mitochondrial-like
LOC121427662	0.000274061	0.255162	0.516	0.424	1	2	calsyntenin-1-like
LOC121427339	0.000283094	-0.465635	0.345	0.424	1	2	EF-hand_domain-containing_protein_D2_homolog
LOC121415455	0.000284991	-0.434961	0.177	0.264	1	2	tetraspanin-36-like
LOC121423647	0.000294195	-0.273196	0.768	0.817	1	2	transcription_factor_AP-1-like
LOC121415663	0.000308523	0.27643	0.31	0.216	1	2	apoptotic_chromatin_condensation_inducer_in_the_nucleus-like
LOC121430690	0.000326486	-0.394371	0.284	0.368	1	2	Krueppel-like_factor_10
LOC121410947	0.000327778	-0.363238	0.655	0.684	1	2	high_mobility_group_protein_1_homolog
LOC121426187	0.000372524	-0.602415	0.445	0.53	1	2	uncharacterized_LOC121426187
LOC121430638	0.000381397	0.598275	0.548	0.463	1	2	monocarboxylate_transporter_2-like
LOC121410491	0.000408126	-0.421236	0.535	0.604	1	2	gamma-interferon-inducible_lysosomal_thiol_reductase-like
LOC121418776	0.000412076	-0.295053	0.571	0.604	1	2	peptidyl-prolyl_cis-trans_isomerase_FKBP2-like
LOC121424557	0.000463879	-0.343357	0.381	0.463	1	2	stromal_cell-derived_factor_2-like
LOC121429444	0.000513884	0.333016	0.568	0.491	1	2	eukaryotic_initiation_factor_4A-I-like
LOC121411567	0.000534494	0.352707	0.287	0.205	1	2	cortactin-binding_protein_2-like
LOC121428441	0.000548891	0.287474	0.281	0.198	1	2	spectrin_alpha_chain,_non-erythrocytic_1-like
LOC121409739	0.000629871	0.294491	0.258	0.181	1	2	sal-like_protein_3
LOC121409142	0.000654507	0.260649	0.355	0.261	1	2	beta-adrenergic_receptor_kinase_2-like
LOC121430636	0.000654564	-0.302239	0.574	0.633	1	2	lysosomal-associated_transmembrane_protein_4A-like
LOC121425148	0.000676987	0.289408	0.439	0.347	1	2	uncharacterized_LOC121425148
LOC121415055	0.000780442	-0.250391	0.558	0.63	1	2	tropomyosin-2-like
LOC121427575	0.000791043	-0.505936	0.232	0.311	1	2	transcription_factor_HES-4-like
LOC121418762	0.000792808	-0.57232	0.603	0.641	1	2	fos-related_antigen_1-like
LOC121406009	0.000794307	0.333275	0.284	0.207	1	2	late_histone_H2B.L3-like
LOC121414246	0.000863651	-0.406754	0.49	0.559	1	2	V-type_proton_ATPase_16_kDa_proteolipid_subunit-like
LOC121418191	0.000897388	0.274225	0.277	0.197	1	2	uncharacterized_LOC121418191
LOC121415581	0.000904325	-0.337471	0.594	0.641	1	2	keratinocyte-associated_protein_2-like
LOC121418777	0.000915636	-0.3317	0.484	0.541	1	2	small_nuclear_ribonucleoprotein_Sm_D2
LOC121427391	0.000941281	-0.384975	0.865	0.874	1	2	gamma-aminobutyric_acid_receptor-associated_protein
LOC121421134	0.00095541	0.332378	0.668	0.558	1	2	calumenin-like
LOC121407964	0.000976119	-0.305529	0.348	0.426	1	2	cathepsin_Z-like
LOC121405842	0.000998083	-0.250926	0.232	0.306	1	2	small_nuclear_ribonucleoprotein_E-like
LOC121408977	0.00100007	0.327269	0.361	0.268	1	2	kinase_suppressor_of_Ras_2-like
LOC121428377	0.00101049	-0.340126	0.487	0.54	1	2	actin-related_protein_2/3_complex_subunit_5-A-like
LOC121430471	0.00108482	-0.336985	0.455	0.513	1	2	ornithine_decarboxylase-like
LOC121410541	0.00113982	-0.258283	0.419	0.48	1	2	protein_transport_protein_Sec61_subunit_alpha-like_1
LOC121411431	0.00127455	-0.25204	0.526	0.602	1	2	ADP-ribosylation_factor_4-like
LOC121413389	0.00139601	0.318215	0.303	0.224	1	2	Krueppel-like_factor_12
LOC121405977	0.00140658	-0.455386	0.848	0.838	1	2
LOC121423991	0.00143081	-0.281906	0.39	0.463	1	2	next_to_BRCA1_gene_1_protein-like
LOC121415566	0.0014502	-0.289711	0.223	0.296	1	2	repulsive_guidance_molecule_A-like
LOC121405802	0.00148789	-0.289023	0.465	0.528	1	2	transaldolase-like
LOC121427487	0.00151134	0.261649	0.255	0.176	1	2	GRB10-interacting_GYF_protein_2-like
LOC121414170	0.00169889	-0.414056	0.242	0.308	1	2	tumor_necrosis_factor_receptor_superfamily_member_EDAR-like
LOC121426152	0.00172093	0.28086	0.577	0.506	1	2	acyl-CoA-binding_protein-like
LOC121419382	0.00173481	-0.410468	0.203	0.271	1	2	delta(14)-sterol_reductase_TM7SF2-like
LOC121410256	0.00178442	-0.529408	0.348	0.422	1	2	rho-related_protein_racA-like
LOC121408312	0.00202054	-0.528316	0.268	0.325	1	2	39S_ribosomal_protein_L3,_mitochondrial-like
LOC121423320	0.00209541	-0.379536	0.506	0.561	1	2	rho_GDP-dissociation_inhibitor_1-like
LOC121411018	0.00213328	0.352924	0.571	0.506	1	2	ubiquitin-like_modifier-activating_enzyme_1
LOC121416992	0.00215074	0.268053	0.277	0.2	1	2	transcriptional_adapter_3-like
LOC121418892	0.00246882	0.325541	0.477	0.392	1	2	homeobox_protein_SIX6-like
LOC121424820	0.00254862	-0.286984	0.374	0.443	1	2	programmed_cell_death_protein_4-like
LOC121419264	0.00255885	-0.266716	0.216	0.284	1	2	uncharacterized_LOC121419264
LOC121410517	0.00266451	-0.317191	0.652	0.686	1	2	ras-related_protein_Rab-7a-like
LOC121418567	0.00267707	-0.497763	0.494	0.523	1	2	uncharacterized_LOC121418567
LOC121431763	0.00270164	-0.272469	0.284	0.348	1	2	tetraspanin-5-like
LOC121411972	0.0031747	-0.306185	0.413	0.477	1	2	coatomer_subunit_zeta-1-like
LOC121419298	0.00338783	-0.287233	0.348	0.401	1	2	ergosterol_biosynthetic_protein_28-like
LOC121414529	0.00399506	-0.325313	0.371	0.419	1	2	tubulin_alpha-1_chain-like
LOC121410373	0.00421504	-0.513135	0.397	0.447	1	2	CDC42_small_effector_protein_2-like
LOC121431885	0.00427317	-0.72931	0.213	0.275	1	2	histone_H4
LOC121411410	0.004362	-0.394959	0.648	0.643	1	2	acidic_leucine-rich_nuclear_phosphoprotein_32_family_member_B-like
LOC121407430	0.00483271	-0.254843	0.565	0.582	1	2	uncharacterized_LOC121407430
LOC121411639	0.00496219	-0.297028	0.361	0.422	1	2	INO80_complex_subunit_D-like
LOC121418918	0.0050527	-0.326608	0.584	0.618	1	2	ras-related_protein_ORAB-1
LOC121409049	0.00521374	-0.322689	0.368	0.422	1	2	coronin-6-like
LOC121421063	0.00537162	-0.27726	0.568	0.601	1	2	ADP-ribosylation_factor_2
LOC121411616	0.00660517	-0.329771	0.261	0.323	1	2	vacuolar_protein_sorting-associated_protein_13C-like
LOC121414417	0.00666766	0.352742	0.258	0.197	1	2	alpha-taxilin-like
LOC121409167	0.00732956	-0.251202	0.206	0.264	1	2	uncharacterized_LOC121409167
LOC121422598	0.00860785	-0.27741	0.439	0.48	1	2	ras-related_protein_Rac1
LOC121413578	0.0088045	-0.424867	0.471	0.53	1	2	uncharacterized_LOC121413578
LOC121411409	0.010334	-0.332634	0.384	0.431	1	2	charged_multivesicular_body_protein_5-like
LOC121410577	0.0120159	0.250385	0.29	0.222	1	2	RNA-binding_protein_15-like
LOC121429222	0.0122514	-0.840671	0.729	0.741	1	2	uncharacterized_LOC121429222
LOC446192	0.0134786	-0.276544	0.752	0.756	1	2	extracellular_matrix_protein_18
LOC121414511	0.0135277	-0.319386	0.5	0.529	1	2	tubulin_alpha-2/alpha-4_chain-like
LOC121408116	0.0144679	0.262434	0.429	0.363	1	2	protein_Jumonji-like
LOC121408448	0.0145513	-0.264264	0.203	0.258	1	2	DNA_polymerase_delta_subunit_4-like
LOC121408832	0.0147337	0.371341	0.387	0.327	1	2	rho_GTPase-activating_protein_26-like
LOC121422407	0.0159099	-0.429099	0.894	0.875	1	2	histone_H1-delta-like
LOC121424717	0.0159159	0.250251	0.513	0.458	1	2	uncharacterized_LOC121424717
LOC121418566	0.0160076	-0.450013	0.661	0.674	1	2	uncharacterized_LOC121418566
LOC121415894	0.0164509	-0.266852	0.448	0.49	1	2	polyubiquitin-C-like
LOC121419175	0.0167993	-0.281872	0.213	0.261	1	2	protein_yippee-like_5
LOC121431592	0.0169553	-0.268045	0.252	0.301	1	2	SH2_domain-containing_protein_4B-like
LOC121414204	0.0180934	0.314759	0.548	0.473	1	2	E3_ubiquitin-protein_ligase_MYCBP2-like
LOC121410359	0.0182809	-0.314085	0.384	0.41	1	2	glycerol-3-phosphate_dehydrogenase_[NAD(+)],_cytoplasmic-like
LOC121407840	0.0188527	-0.451125	0.242	0.282	1	2	ribonucleoside-diphosphate_reductase_large_subunit-like
LOC121427722	0.0192282	0.325271	0.294	0.235	1	2	ski_oncogene-like
LOC121418074	0.0217131	0.384448	0.281	0.227	1	2	nesprin-1-like
LOC121409126	0.0239789	-0.286652	0.435	0.466	1	2	small_nuclear_ribonucleoprotein_Sm_D3-like
LOC121428459	0.0240095	-0.420548	0.584	0.618	1	2	endoplasmic_reticulum_chaperone_BiP-like
LOC121427013	0.0243887	-0.265926	0.223	0.264	1	2	splicing_factor_3B_subunit_6-like
LOC121413780	0.0292615	-0.353205	0.277	0.331	1	2	sequestosome-1-like
LOC121410689	0.0295828	-0.302429	0.203	0.252	1	2	collagen_alpha-1(I)_chain-like
LOC121425031	0.0320691	0.268932	0.597	0.527	1	2	probable_JmjC_domain-containing_histone_demethylation_protein_2C
LOC121423799	0.0321254	0.337924	0.774	0.722	1	2	MAP_kinase-interacting_serine/threonine-protein_kinase_1-like
LOC121408814	0.0334925	-0.271217	0.684	0.689	1	2	dynein_light_chain_LC6,_flagellar_outer_arm-like
LOC121425227	0.034464	-0.411414	0.223	0.279	1	2	centrosomal_protein_of_55_kDa-like
LOC121415187	0.0353836	-0.377845	0.271	0.313	1	2	histone-lysine_N-methyltransferase_ASH1L-like
LOC121407463	0.0416713	-0.253141	0.306	0.342	1	2	uncharacterized_LOC121407463
LOC121423169	0.0428377	-0.53943	0.248	0.281	1	2	histone_H4
LOC121418138	0.0519738	-0.258913	0.219	0.26	1	2	NF-kappa-B_inhibitor_alpha-like
LOC121418739	0.0619831	0.284535	0.335	0.291	1	2	alpha-(1,6)-fucosyltransferase-like
LOC121418945	0.0640044	-0.254641	0.319	0.349	1	2	microtubule-associated_proteins_1A/1B_light_chain_3C-like
LOC121407892	0.0654114	-0.461652	0.568	0.526	1	2	peptidyl-prolyl_cis-trans_isomerase_6-like
LOC121425645	0.0827918	-0.256033	0.477	0.488	1	2	lupus_La_protein_homolog
LOC121410498	0.0883162	-0.283165	0.232	0.264	1	2	transcription_factor_E3-like
LOC121411122	0.0911907	-0.270202	0.477	0.494	1	2	heat_shock_cognate_71_kDa_protein-like
LOC121424789	0.0949502	-0.255026	0.294	0.317	1	2	pantothenate_kinase_3-like
LOC121419232	0.095811	-0.251049	0.232	0.265	1	2	spastin-like
LOC121411899	0.102643	-0.442809	0.239	0.27	1	2	ankyrin_repeat_domain-containing_protein_27-like
LOC121410003	0.131803	-0.27231	0.239	0.264	1	2	glutamine--tRNA_ligase-like
LOC121418977	0.145568	-0.261241	0.3	0.321	1	2	mitogen-activated_protein_kinase-binding_protein_1-like
LOC121431736	0.148263	-0.591055	0.697	0.663	1	2	tubulin_alpha-3_chain-like
LOC121411843	0.160593	-0.275482	0.361	0.376	1	2	endoplasmin-like
LOC121428833	0.211237	-0.697556	0.229	0.251	1	2	heat_shock_70_kDa_protein_IV
LOC121410444	0.234573	-0.337819	0.261	0.274	1	2	metalloproteinase_inhibitor_1-like
LOC121427592	0.252174	-0.274095	0.652	0.642	1	2	translocation_protein_SEC62-like
LOC121423241	0.316975	-0.304145	0.284	0.289	1	2	cell_death-inducing_p53-target_protein_1_homolog
LOC121432057	0.325459	-0.251283	0.235	0.256	1	2	monocarboxylate_transporter_13-like
LOC121428778	0.336127	-0.36687	0.265	0.229	1	2	heat_shock_70_kDa_protein_IV-like
LOC121410556	0.354781	-0.402083	0.906	0.909	1	2	procathepsin_L-like
LOC121410477	0.487216	-0.270951	0.255	0.263	1	2	uncharacterized_LOC121410477
LOC121423762	0.50646	-0.279412	0.635	0.625	1	2	dnaJ_homolog_subfamily_B_member_4-like
LOC121432004	0.682083	-0.958424	0.3	0.287	1	2	interferon_alpha-inducible_protein_27,_mitochondrial-like
LOC121408202	0.724564	-0.420474	0.271	0.248	1	2	A-kinase_anchor_protein_1,_mitochondrial-like
LOC121423558	0.861092	0.269498	0.503	0.495	1	2	uncharacterized_LOC121423558
LOC121416842	2.06e-73	3.57884	0.312	0.04	3.93e-69	3	uncharacterized_LOC121416842
LOC121418514	5.27e-61	1.18595	1	0.948	1.01e-56	3	uncharacterized_LOC121418514
LOC121428312	9.35e-58	-1.55599	0.899	0.979	1.79e-53	3	actin,_cytoskeletal_1A
LOC121430638	2.23e-54	2.16348	0.729	0.444	4.26e-50	3	monocarboxylate_transporter_2-like
LOC121413087	2.07e-49	-0.66017	0.941	0.998	3.95e-45	3	elongation_factor_1-alpha
LOC121425227	6.64e-49	1.70161	0.594	0.238	1.27e-44	3	centrosomal_protein_of_55_kDa-like
LOC121423346	5.17e-48	2.19488	0.486	0.179	9.88e-44	3	histone_H3.3A
LOC121428227	9.83e-48	-0.77778	0.938	0.991	1.88e-43	3	60S_ribosomal_protein_L11
LOC121420063	1.97e-47	1.69164	0.74	0.458	3.76e-43	3	AAC-rich_mRNA_clone_AAC4_protein-like
[truncated: 7,759 more rows]

## Sheet: Lv_10FBS_Marker Gene Expression
Table S6 – Single-cell RNA sequencing of L. variegatus embryonic cells cultured in UM with 10% FBS - Marker gene expression
Gene ID	Cluster 0	Cluster 1	Cluster 2	Cluster 3	Cluster 4	Cluster 5	Cluster 6	Cluster 7	Cluster 8	Cluster 9
Skeletogenic Cell Markers (mesoderm)
LOC121406034	0.00829745	0.0252972	0.507328	0.0128421	0.0113776	0	0.0653788	0	0	0	27_kDa_primary_mesenchyme-specific_spicule_protein-like
LOC121417490	0.00171926	0.0149339	0	0	0.0129135	0	0	0	0	0	30_kDa_spicule_matrix_protein_alpha-like
LOC121406020	0.0188046	0.270505	0.0960146	0.0162524	0	0.0140346	0	3.11657	0.0238622	0	30_kDa_spicule_matrix_protein_alpha-like
LOC121405815	0	0	0.307157	0	0	0	0	0	0	0	34_kDa_spicule_matrix_protein
LOC121406031	0.00989415	0	0.594913	0.00362273	0	0	0.0455745	0	0	0	34_kDa_spicule_matrix_protein-like
LOC121405817	0.0204568	0.0201041	0.0314215	0	0	0	0	0	0	0	41_kDa_spicule_matrix_protein-like
LOC121427215	0.00245537	0.0264408	0.653395	0.0106351	0	0	0	0	0	0	mesenchyme-specific_cell_surface_glycoprotein-like
LOC121427467	0	0	0.019522	0	0	0	0	0.165568	0	0	mesenchyme-specific_cell_surface_glycoprotein-like
LOC121428121	0.0250198	0.0204335	0.638031	0.024865	0.100674	0.0202278	0.0217057	2.10492	0.228289	0	mesenchyme-specific_cell_surface_glycoprotein-like
LOC121427387	0.00158171	0.0195424	0.153701	0.00465727	0	0	0	0	0	0	mesenchyme-specific_cell_surface_glycoprotein-like
LOC121427724	0.0017074	0	0	0	0	0	0.0814566	0	0	0.20931	mesenchyme-specific_cell_surface_glycoprotein-like
Total Expression	0.0899365	0.397257	3.00148	0.0728745	0.124966	0.0342624	0.214116	5.38707	0.252151	0.20931
Pigment Cell Markers (mesoderm)
LOC121428528	0.187146	0.147219	0.20366	0.212586	0.1139	0.175873	0.207535	0.475673	10.7176	0.391972	probable_polyketide_synthase_1
LOC121418887	0.795875	0.427825	0.0883768	0.793033	0.623217	1.07314	0.503317	0.0502995	1.42545	0	homeobox_protein_six1-like
Total Expression	0.983021	0.575044	0.292037	1.00562	0.737118	1.24901	0.710852	0.525972	12.1431	0.391972
Immune Cell Markers (mesoderm)
LOC121423318	0.103495	0.157363	0.0613215	0.0732494	0.00624368	0.0282878	0.0926967	0.305026	0	0.781321	antiviral_innate_immune_response_receptor_RIG-I-like
LOC121424758	0.299437	0.991749	0.378692	0.324365	0.097472	0.180275	0.139314	2.99489	0.102657	1.38519	antiviral_innate_immune_response_receptor_RIG-I-like
LOC121429221	0.0483641	0.153014	0.0684329	0.0537489	0.0178602	0.0180877	0.0806087	1.17168	0.0611307	0	antiviral_innate_immune_response_receptor_RIG-I-like
LOC121429836	0.0745356	0.105587	0.0518725	0.108191	0.024481	0.0826971	0.0684424	0.478645	0.13081	0.230712	B-cell_CLL/lymphoma_6_member_B_protein-like
LOC121408239	0.846155	0.716164	0.717821	0.620279	0.511498	0.609481	0.61496	0.472258	0.965595	1.16296	B-cell_CLL/lymphoma_7_protein_family_member_B-A-like
LOC121410653	0.0836077	0.315318	0.269636	0.106706	0.146231	0.0803922	0.165594	0.0271652	0.164044	0.248509	myeloid_differentiation_primary_response_protein_MyD88-like
LOC121427405	0.866489	0.838413	0.836822	0.833202	0.878525	0.899001	0.856988	1.08916	1.08181	1.57708	myeloid_leukemia_factor_2-like
LOC121415046	0.341446	0.412386	0.500156	0.340447	0.20907	0.288303	0.327579	0.515649	0.481609	1.39733	myeloid-derived_growth_factor-like
LOC121422399	0.0168371	0.11206	0.022789	0.0156109	0.0121565	0.088579	0.0154767	0	0	0	scavenger_receptor_cysteine-rich_domain_superfamily_protein-like
LOC121407539	0.0480684	0	0.130648	0.0420505	0.0168012	0.0143997	0.00994716	0	0	0	scavenger_receptor_cysteine-rich_domain_superfamily_protein-like
LOC121418958	0	0.0271434	0	0.00239049	0	0	0.00744048	0	0	0	scavenger_receptor_cysteine-rich_domain_superfamily_protein-like
LOC121430492	0.274247	0.531139	1.44321	0.254249	0.184878	0.261782	0.300517	0.664405	0.328006	1.54569	scavenger_receptor_cysteine-rich_domain_superfamily_protein-like
LOC121430969	0.0136424	0.00169331	0.188922	0.00905837	0	0.00748025	0	0.161457	0	0	scavenger_receptor_cysteine-rich_domain_superfamily_protein-like
LOC121405657	0	0	0.0407811	0	0	0	0	0.0555435	0	0	scavenger_receptor_cysteine-rich_domain_superfamily_protein-like
LOC121419637	0.00579428	0	0.0242386	0	0	0	0	0	0	0	scavenger_receptor_cysteine-rich_domain-containing_group_B_protein-like
LOC121423765	0.0971845	0.0490194	0.138681	0.178525	0.11553	0.0751241	0.128113	0.546852	0	0.758575	scavenger_receptor_cysteine-rich_domain-containing_group_B_protein-like
LOC121429458	0.0286711	2.58026	0.0376351	0.0210291	0.0179062	0.0193664	0.0551105	0.0385677	0	0	scavenger_receptor_cysteine-rich_domain-containing_group_B_protein-like
LOC121407742	0	0.0378065	0.0345004	0.0286527	0	0	0.00187601	0.0725037	0	0	scavenger_receptor_cysteine-rich_type_1_protein_M130-like
LOC121414099	0.00428025	0.0337948	0.0738342	0	0	0	0	0.333032	0	0.293427	scavenger_receptor_cysteine-rich_type_1_protein_M130-like
LOC121415100	0.00357174	0.0318532	0.00283784	0.0102646	0	0.00443696	0	0	0	0.088728	scavenger_receptor_cysteine-rich_type_1_protein_M130-like
LOC121405934	0.929035	1.686	1.69226	1.45183	0.875457	0.977439	0.929129	2.47771	1.76177	4.52969	toll-interacting_protein-like
LOC121411011	0	0.0151628	0.14442	0	0	0.0123875	0	0.0832087	0	0	toll-like_receptor_3
LOC121412631	0.00539107	0	0.0424858	0	0	0.0021159	0	0.263266	0	0	toll-like_receptor_3
LOC121415541	0	0	0.0113001	0	0	0	0	0	0	0	toll-like_receptor_3
LOC121422461	0.0851056	0.127672	0.0177206	0.0365672	0.0344796	0.119403	0.0295381	0	0.294395	0.717501	toll-like_receptor_3
LOC121427964	0.00318051	0.00177761	0.0783248	0.0174186	0	0	0	0.0981803	0	0	toll-like_receptor_3
LOC121425855	0	0	0.0519006	0	0.0180056	0	0	0.052285	0	0	toll-like_receptor_6
LOC121427692	0	0	0.00662049	0	0.0109379	0	0	0.0502995	0	0	toll-like_receptor_Tollo
LOC121422122	0.113096	0.131147	1.6764	0.0647673	0.250474	0.137721	0.254995	5.45322	0.113148	0.293427	complement_C1q_tumor_necrosis_factor-related_protein_2-like
LOC121410559	0.00214307	0.00555893	0.0119785	0.00971084	0.0247348	0.014638	0	0	0	0	complement_C1q_tumor_necrosis_factor-related_protein_3-like
LOC121414735	0.139116	0.0745343	0.0471687	0.0917572	0.184745	0.124601	0.443528	0	0	0.8719	complement_C1q_tumor_necrosis_factor-related_protein_4-like
LOC121425687	0.0982247	0.0798922	0.0473639	0.152911	0.115912	0.201962	0.122093	0.0657242	0	0	complement_C1q_tumor_necrosis_factor-related_protein_7-like
LOC121428574	0.0112684	0	0.0118952	0.0571475	0.0106356	0.00464691	0	0	0	0	complement_C2-like
LOC121417165	0.0441393	0.0102273	2.21608	0.0661176	0.0420286	0.0445009	0.0601286	1.26812	0	0	complement_C3-like
LOC121428641	0.188902	0.358859	0.2549	0.24641	0.112943	0.114188	0.0823834	0.421971	1.12473	0	complement_C3-like
LOC121408166	0.46073	0.297405	0.206505	0.399061	0.55346	0.337143	0.394469	0.0867832	0.074758	0.610948	complement_component_1_Q_subcomponent-binding_protein,_mitochondrial-like
LOC121429261	0.00842832	0.0036752	0.00328161	0	0	0	0	0	0	0	complement_factor_B-like
LOC121424089	0	0.0294673	0	0.00951993	0.00669401	0	0	0	0	0	complement_factor_H-like
LOC121427693	0.0419822	0.00643916	0.0944635	0.0118428	0.0279644	0.0142582	0.017237	0.905041	0	0	complement_factor_H-like
LOC121409134	0	0	0.00459878	0	0	0	0.0206459	0	0	0	echinoidin-like
LOC121413901	0.0107386	0.00224307	0.00283784	0.0141427	0.0369202	0.0365086	0	0	0	0	echinoidin-like
LOC121413965	0.152729	0.0391021	0	0.133881	0.181417	0.263865	0	0	0	0	echinoidin-like
LOC121426882	0.00265948	0	0.068111	0.00669086	0.0121917	0	0	0.068472	0	0	echinoidin-like
LOC121426925	0	0	0.0664198	0.00765059	0.00731764	0	0.00833784	0	0	0	echinoidin-like
LOC121427330	0	0.00231229	0.137692	0	0.0261824	0	0	0.0705796	0	0	echinoidin-like
LOC121429941	0	0	0.0939103	0.00511264	0	0.00571404	0	0.095648	0	0	echinoidin-like
LOC121429883	0.0112929	0	0.29231	0.00313655	0.0261824	0.0106424	0	0.169521	0	0	echinoidin-like
LOC121407054	0	0	0	0	0.0302264	0	0.030964	0	0	0	erythroid_differentiation-related_factor_1-like
LOC121407251	0.0210102	0.0344751	0.031247	0.0365008	0.00471067	0.0504486	0.027998	0	0.248016	0	erythroid_differentiation-related_factor_1-like
Total Expression	5.485	10.0007	12.335	5.8442	4.83227	5.12988	5.28611	20.5569	6.93247	16.493
Muscle Cell Markers (mesoderm)
LOC121423582	0.254416	0.506443	0.169027	0.300166	0.131198	0.21126	0.205514	0.331477	0.158308	0.298038	muscle,_skeletal_receptor_tyrosine-protein_kinase-like
LOC121425834	1.02182	2.16	0.227063	1.56986	0.425657	0.546504	7.69693	0.391931	0	0.619425	muscle_M-line_assembly_protein_unc-89-like
LOC121429542	1.45384	1.23311	1.71582	1.79616	1.0272	1.86405	1.83961	1.03036	0.728344	1.45875	muscleblind-like_protein_3
LOC121423729	1.50388	1.67373	1.02246	1.65415	1.47286	1.82487	2.32528	0.719135	0.967715	3.46478	muscle-specific_protein_20-like
LOC121423883	0.358079	0.934151	0.693975	0.372854	0.2615	0.418343	0.20955	0.459586	0.584416	0.260952	muscle-specific_protein_20-like
LOC121423749	0.419357	0.819268	1.22313	0.464877	0.597461	0.400868	0.311995	1.43448	0.54357	0.692593	muscle-specific_protein_20-like
LOC121423027	0.105179	0.213629	0.37923	0.101029	0.121756	0.176881	0.323255	0.615564	0.18195	0	myocardin-related_transcription_factor_A-like
LOC121415207	0.760755	0.950434	2.62073	1.4426	0.449758	0.627593	0.911136	2.20298	0.834846	1.20081	myocyte-specific_enhancer_factor_2A-like
LOC121414041	0.0343808	0.00810754	0.0165637	0.006736	0	0	0.802814	0	0	0	myophilin-like
LOC121408547	0.396412	0.427382	0.213908	0.795335	0.233688	0.660207	1.23793	0.0884315	0	0.806934	myosin_heavy_chain,_striated_muscle-like
LOC121411529	0	0.0356609	0.0140602	0	0	0	0.224352	0	0	0	myosin_light_chain_3,_skeletal_muscle_isoform-like
LOC121424934	0.195225	0.667234	0.356403	0.160214	0.165705	0.0983416	13.5654	0.619508	0	0	myosin_light_chain_kinase,_smooth_muscle-like
LOC121425215	0.190909	2.1383	0.233314	0.378924	0.126206	0.0980742	0.200934	0.758113	0.272807	0	myosin_light_chain_kinase,_smooth_muscle-like
LOC121430536	3.69883	4.49632	4.26749	4.43535	4.76472	5.58096	3.7832	3.78265	5.1987	4.51221	myosin_regulatory_light_chain_2,_smooth_muscle_minor_isoform-like
LOC121421431	2.55004	1.5559	2.96052	2.29335	2.34108	2.48731	2.73064	2.47038	2.78626	3.44149	myotrophin-like
LOC121423932	0.0229787	0.0538155	0.00798817	0.031061	0	0.0438136	0.0346549	0	0	0	dystrophin,_isoforms_A/C/F/G/H-like
LOC121413102	0.0253027	0.130202	0.0110202	0.0901042	0.0068548	0.0476837	0	0	0	0	dystrophin-like
LOC121413111	0.0640528	0.207226	0.0191847	0.0721637	0	0.0767069	0.0559984	0	0	0.195986	dystrophin-like
LOC121414389	0.00214307	0.00753711	0	0.0110961	0.00761712	0	0	0	0	0	dystrophin-like
LOC121414390	0.0199067	0.0329006	0.00445946	0.0215688	0	0.00478012	0	0	0	0.912852	dystrophin-like
LOC121414391	0.201623	0.168934	0.137173	0.198881	0.227657	0.255806	0.319316	0.112925	0	0	dystrophin-like
LOC121414482	0.0825114	0.197942	0.0617176	0.137972	0.0607382	0.14905	0.179732	0.152089	0	0.619425	dystrophin-like
LOC121421575	0.00394611	0	0	0.00514558	0	0.0142472	0	0	0	0	troponin_T,_cardiac_muscle_isoforms-like
LOC121421054	1.36334	2.42525	0.831563	1.62891	1.6112	1.75311	5.55031	1.14476	0.380985	0.502737	troponin_I-like
LOC121421102	0.458937	0.602723	0.257941	0.606757	0.440458	0.433399	1.43475	0.339868	0	0.20931	troponin_I-like
LOC121421391	0.0846199	0.181066	0.0346616	0.0473932	0.0454939	0.032683	2.06917	0.103383	0	0	troponin_T-like
LOC121421806	0.0669323	0.0990048	0.0163556	0.00627573	0.0277831	0.0990838	0.0834268	0.0608995	0	0	troponin_T,_skeletal_muscle-like
LOC121420945	0.160329	0.129064	0.0294082	0.101452	0.19873	0.191471	0.11422	0	0	0	troponin_T,_skeletal_muscle-like
Total Expression	15.4997	22.0553	17.5252	18.7304	14.7453	18.0971	46.2102	16.8185	12.6379	19.1963
Neuronal Cell Markers (Ectoderm)
LOC121430133	0.0255949	2.48095	0.0116174	0.0290934	0.00909121	0.011671	0.0185853	0.0771355	0	0	transcription_factor_Sox-2-like
LOC121420114	0.695156	1.90101	0.187673	0.692763	0.594151	0.860324	1.35078	0.113443	0	27.333	amyloid-like_protein_1
LOC121419935	0.0146885	0.0725301	0.0136538	0.0347781	0.00475977	0.0199611	0.0482978	0	0	0	neural_cell_adhesion_molecule_1-like
LOC121420039	0.0697612	0.227843	0.0403367	0.0885728	0.0862979	0.0803364	0.0679813	0	0	0	neural_cell_adhesion_molecule_1-like
LOC121420426	0.0271504	0.011162	0.0154457	0.0413369	0.0144199	0.035603	0	0.162571	0	0	neural_cell_adhesion_molecule_L1-like
LOC121429231	0.0268326	0.0696474	0.0329621	0.0510021	0.00914705	0.0731473	0.040135	0.0103586	0.456009	0.433176	neural_proliferation_differentiation_and_control_protein_1-like
LOC121410776	0.355295	0.459737	0.647972	0.331899	0.285578	0.295374	0.387857	0.725221	0.22929	0.523888	neural_Wiskott-Aldrich_syndrome_protein-like
LOC121427416	0.0675025	0.0687191	0.160667	0.119844	0.0260472	0.150527	0.123924	0	0.0238622	0.195986	neuralized-like_protein_4
LOC121418785	0.0942654	0.0599908	0.0381158	0.115743	0.0492672	0.0731666	0.258275	0	0	2.16	neurexin-3a-like
LOC121410654	0.178836	0.768165	0.130756	0.209536	0.0809419	0.201061	0.282819	0.0881788	0	0.850138	neurexin-4-like
LOC121431448	0.00973939	0.00400291	0.0885012	0.00239049	0.0068548	0.0265213	0.0463413	0.0499186	0	0	neurexin-4-like
LOC121412155	0.124183	0.232835	0.106592	0.133448	0.100577	0.153818	0.150305	0.139744	0.136403	0	neurobeachin-like
LOC121412231	0.0580591	0.281072	0.106411	0.101896	0.0393629	0.10126	0.0592439	0.0757655	0.109572	1.2364	neurobeachin-like
LOC121425792	0.0583967	0.0874497	0.108108	0.0944439	0.0322809	0.0643271	0.117054	0.120068	0.16774	0	neurobeachin-like_protein_1
LOC121418701	0.558214	9.66821	0.330476	0.494864	0.45504	0.709268	0.606788	1.08617	0.0747429	0.956662	neuroblast_differentiation-associated_protein_AHNAK-like
LOC121424809	1.02121	0.719319	0.203887	1.14727	0.782472	1.8376	1.44128	0.191887	0	0	neuroblast_differentiation-associated_protein_AHNAK-like
LOC121415410	0.160212	0.206383	0.125821	0.174324	0.100975	0.152236	0.0523094	0.362592	0	0.351664	neuroblastoma-amplified_sequence-like
LOC121408274	0.00542248	0.0558107	0.00505812	0.0133855	0	0	0.0418183	0	0	0	neurocalcin_homolog
LOC121430553	0.484083	0.595241	0.89393	0.589969	0.446683	0.6742	0.979709	0.670953	1.2808	13.0357	neurocalcin_homolog
LOC121409194	0	0.201551	0.0146435	0	0	0	0	0	0.807597	0	cyclic_nucleotide-gated_channel_cone_photoreceptor_subunit_alpha-like
LOC121419326	0.0112642	0	0.00164747	0.0114541	0.0255555	0.0175836	0	0	0	0.461425	cyclic_nucleotide-gated_channel_rod_photoreceptor_subunit_alpha-like
LOC121417824	0.0387261	0	0	0	0	0.00872632	0.0250888	0	0	0	neurocan_core_protein-like
LOC121415184	0.0121749	0.0377853	0.0215359	0.006124	0	0.0233752	0	0	0	0	neurochondrin-like
LOC121415206	0.0363936	0.0123489	0.00963265	0.033572	0.00617389	0.0266543	0.0475106	0	0	0	neurochondrin-like
LOC121408157	0.18059	0.194201	0.214639	0.161218	0.110125	0.210653	0.184653	0.38595	0	0.260952	neurofibromin-like
LOC121424392	0.361481	0.46572	0.126534	0.285782	0.178619	0.330007	0.179429	0.328377	0	0.616979	neurofilament_heavy_polypeptide-like
LOC121432068	0.254117	0.528598	0.166085	0.430715	0.158551	0.458688	0.340452	0.366879	0.240305	0	neurofilament_heavy_polypeptide-like
LOC121425197	0.0119055	0.0407839	0.00179316	0.0305917	0.0053527	0.0315615	0.0235379	0.0725037	0	0	neurofilament_medium_polypeptide-like
LOC121406176	0.00123067	0.258711	0	0	0.00726178	0	0.0164385	0	0	0	neurogenic_locus_notch_homolog_protein_1-like
LOC121408365	0.0171365	0.166134	0.0109783	0.016971	0.0416776	0.0783535	0.00187601	0	0.221317	0	neurogenic_locus_notch_homolog_protein_1-like
LOC121423056	0	0.192835	0	0	0	0	0	0	0	0	neurogenic_locus_notch_homolog_protein_1-like
LOC121422629	0.0506287	0.621927	0	0.00619404	0.00442462	0.0187524	0	0	0	0.177456	neurogenic_locus_notch_homolog_protein_1-like
LOC121432217	0.00294691	0.013433	0.0667775	0	0	0.00870202	0	0	0	0	neurogenic_locus_notch_homolog_protein_1-like
LOC121409445	0.03481	0	0.00351681	0.0192987	0	0.00316692	0	0	0	0	neurogenic_locus_notch_homolog_protein_2-like
LOC121408993	0.121198	0.132954	0.0807664	0.123508	0.0950248	0.151691	0.0549555	0.047336	0	0.882158	neurogenic_locus_notch_homolog_protein_2-like
LOC121419572	0.00422219	0.0107943	0	0.00574721	0.0146935	0.00720736	0.0621583	0	0	0	neurogenic_locus_notch_homolog_protein_2-like
LOC121422898	0.00835372	0.189386	0	0.0177592	0	0	0	0	0	0	neurogenic_locus_notch_homolog_protein_2-like
LOC121408928	0.00529737	0	0.0349329	0.00593735	0	0	0	0	0	0	neurogenic_locus_Notch_protein-like
LOC121411096	0.00607715	0.181397	0	0	0.00467339	0	0	0.11743	0	0	neurogenic_locus_Notch_protein-like
LOC121406041	0.462121	0.397268	0.185257	0.314287	0.230514	0.531233	0.406576	0.441009	0.0416722	0.554379	neuron_navigator_2-like
LOC121405822	0.179328	0.419584	0.09276	0.115035	0.0332995	0.130827	0.530409	0.0590174	0	0.195986	neuron_navigator_2-like
LOC121406089	0.02457	0.0500634	0.0194355	0.0252074	0.00651076	0.152253	0.0969983	0.0204496	0	0	neuron_navigator_3-like
LOC121428446	0.122062	0.340078	0.13922	0.171236	0.145253	0.121079	0.219302	0.0910614	0.0416722	0.479221	neuronal_calcium_sensor_1-like
LOC121429319	0.0447568	0.250218	0.118514	0.0579536	0.0470865	0.0102341	0.0659661	0.120657	0.512164	0	neuronal_calcium_sensor_1-like
LOC121410924	0.481619	1.04417	0.25243	0.674443	0.349869	0.724394	1.97798	0.255402	0.0416722	16.5581	neuronal_cell_adhesion_molecule-like
LOC121422572	0.0696216	0.509157	0.838625	0.110384	0.0906923	0.0798872	0.0717924	0.397495	1.08865	0.20931	neuronal-specific_septin-3-like
LOC121425420	0	0	0.00174269	0	0	0	0.0375824	0	0	0.986431	neuropeptide_Y_receptor_type_2-like
LOC121428023	0.0032935	0.125049	0.00920413	0.00239049	0	0.0050558	0	0	0.593449	0	neuropeptide_Y_receptor_type_6-like
LOC121419206	0	0.0619395	0	0	0	0	0	0	0	6.36515	neuropeptides_capa_receptor-like
LOC121405992	0.00259827	0	0	0	0.00933913	0.00482509	0.010654	0	0	0	neuropeptides_capa_receptor-like
LOC121410940	0.00318258	0	0.0373894	0	0	0	0	0	0	0	neuropeptides_capa_receptor-like
LOC121411198	0.00512391	0	0.192089	0.00525043	0	0	0	0	0	0	neuropeptides_capa_receptor-like
LOC121409622	0.273495	0.119633	0.186293	0.312286	0.299884	0.35037	0.211416	0.241623	0.211011	0.990739	neurotrypsin-like
LOC121410293	0.0705001	0.0655882	0.0843995	0.0829881	0.0838154	0.100571	0.0604777	0.0387024	0.0911344	0	neurotrypsin-like
LOC121414889	0.0351514	0	0.0255153	0.0231198	0.0158205	0.0317159	0.0322053	0	0	0.195986	neurotrypsin-like
LOC121415934	0.102425	0.0455228	0.0906356	0.0720779	0.045232	0.0884895	0.076435	0.115744	0	0.195986	neurotrypsin-like
LOC121415959	0.145961	0.121625	0.0761986	0.115715	0.0678109	0.0946874	0.138739	0	0	0	neurotrypsin-like
LOC121418359	0	0.0170038	0.00308475	0	0	0	0	0	0	0	neurotrypsin-like
LOC121431015	0.00247855	0.02647	0	0.0221102	0.00403613	0	0.00596013	0	0	0	neurotrypsin-like
LOC121431784	0.0124492	0.337317	0.0317533	0.0455546	0.0135603	0.0150079	0	0.249425	0	0	neurotrypsin-like
LOC121431718	0.0323467	0.0160619	0.0308095	0.0930354	0.0065021	0.00926052	0.0272244	0.0679129	0	0	neurotrypsin-like
LOC121428781	0.00991328	0.110562	0.00641876	0.0177438	0	0.015307	0.0104593	0	0	0	NMDA_receptor_synaptonuclear_signaling_and_neuronal_migration_factor-like
LOC121431038	0.00186624	0.00932252	0	0.00979497	0	0	0.0273621	0	0	0.628773	regulating_synaptic_membrane_exocytosis_protein_2-like
LOC121417021	0.00203555	0	0	0.0139367	0.00871858	0.0112707	0.080435	0	0	0.610948	regulating_synaptic_membrane_exocytosis_protein_2-like
LOC121417056	0.0425163	0.0476924	0.00722686	0.0207126	0.10676	0.0135598	0.188036	0	0	2.57025	regulating_synaptic_membrane_exocytosis_protein_3-like
LOC121430086	0.188524	0.368057	0.155787	0.152363	0.0897962	0.257978	0.114669	0.722073	0.883068	0.812965	semaphorin-1A-like
LOC121415379	0.286667	0.59925	0.592917	0.370798	0.229583	0.25521	0.534911	0.215144	0.99119	0.31944	semaphorin-1A-like
LOC121416262	0.0530465	0.100388	0.0671978	0.0729655	0.0604183	0.0776677	0.0716845	0	0	0.172224	semaphorin-1A-like
LOC121415483	0.0451859	0.0369273	0.0675434	0.0404315	0.0555486	0.0571478	0.032911	0.230999	0	0	semaphorin-1A-like
LOC121415590	0.189716	0.393499	0.305138	0.147261	0.104726	0.235184	0.0971099	0.33411	0.39251	0.195986	semaphorin-2A-like
LOC121411356	0.484212	0.466903	0.161581	0.580173	0.321333	0.764936	0.614916	0.0103586	0	0.619425	semaphorin-5A-like
LOC121416267	0.108738	0.276517	0.0110669	0.20564	0.0621257	0.167675	0.0688711	0.0204496	0	1.05734	semaphorin-6D-like
LOC121416298	0.149392	0.18199	0.00387635	0.115435	0.103104	0.177196	0.0761631	0	0	0.520108	semaphorin-6D-like
LOC121415748	0.0497555	0.0576574	0.00724675	0.0364019	0.0211004	0.00944333	0.0352374	0.0169025	0.139821	0.230712	survival_motor_neuron_protein-like
LOC121415864	0.314851	0.226242	0.278937	0.282102	0.275386	0.248607	0.297256	0.114116	0.15759	0	survival_motor_neuron_protein-like
LOC121428989	0.212389	0.358522	0.196765	0.238797	0.296412	0.278006	0.384059	0.231747	0.316616	1.40795	survival_of_motor_neuron-related-splicing_factor_30-like
LOC121414415	0.175005	0.366214	0.254238	0.244208	0.175212	0.208413	0.189138	0.228885	0.101395	0.628773	synapse-associated_protein_1-like
LOC121414452	0.111025	0.168164	0.18649	0.0959035	0.188659	0.176614	0.124254	0.0710063	0.168005	0	synapse-associated_protein_1-like
LOC121408610	0.0478613	0.0750747	0.0567786	0.0242829	0.00812686	0.0126132	0.0495863	0.136362	0.103614	0.705707	synaptic_vesicle_2-related_protein-like
LOC121408904	0.0272073	0.0368058	0.01212	0.0155803	0	0.00833823	0.0201128	0.0994319	0.0827157	0	synaptic_vesicle_2-related_protein-like
LOC121430007	0.0617397	0.119103	0.0689645	0.0851858	0.0136349	0.0761319	0.0422257	0.11246	0	0	synaptic_vesicle_2-related_protein-like
LOC121411790	0.0547792	0.0851375	0.0629103	0.0441479	0.0334526	0.0653068	0.107154	0.0774048	0.0747429	0	synaptic_vesicle_glycoprotein_2B-like
LOC121422033	0.0172088	0.0484597	0.017757	0.0219093	0.0101682	0.0225837	0	0.0337535	0	0	synaptic_vesicle_glycoprotein_2B-like
LOC121420942	0.085335	0.100121	0.112791	0.220295	0.0830556	0.0571811	0.0423053	0.0771699	0	0	synaptic_vesicle_glycoprotein_2B-like
LOC121425709	0.386802	0.33427	0.577492	0.350236	0.325036	0.405721	0.295733	0.559951	0.745944	0.94276	synaptobrevin_homolog_YKT6-like
LOC121413954	0.0214816	0.214805	0.0119689	0	0	0	0.00314808	0	0	0	synaptogenesis_protein_syg-1-like
LOC121419593	0	0.00396176	0.0327279	0	0	0.00373728	0	0	0	0	synaptogenesis_protein_syg-2-like
LOC121419611	0	0.0317026	0	0.0211047	0	0.0280201	0	0	0	0	synaptogenesis_protein_syg-2-like
LOC121422529	0.147098	0.499857	0.435119	0.303721	0.239287	0.277024	0.302443	0.571294	0.316144	0.716658	synaptogyrin-3-like
LOC121411571	0.201541	0.209335	0.376672	0.146368	0.177919	0.173549	0.208877	0.347891	0.630255	0	synaptophysin-like
LOC121431749	0.229921	1.41212	0.0394494	0.661221	0.34825	0.303647	0.908994	0.0169025	0	0	synaptopodin_2-like_protein
LOC121418685	0.259241	0.33422	0.449251	0.287484	0.248748	0.384458	0.283227	0.41855	0.756911	10.4608	synaptosomal-associated_protein_25-like
LOC121409236	0.203013	0.348811	0.568396	0.210485	0.18721	0.347628	0.219661	0.820591	0.65166	0.248509	synaptosomal-associated_protein_29-like
LOC121426324	0.108618	0.127621	0.0899833	0.127132	0.0716836	0.0719997	0.0784278	0.119499	0.145756	0	synaptosomal-associated_protein_47-like
LOC121411791	0.0980718	0.27975	0.056333	0.0393632	0.0922616	0.131324	0.039957	0.329509	0.0238622	0.088728	extended_synaptotagmin-2-like
LOC121414850	0	0	0	0	0	0	0	0	0	1.02312	synaptotagmin-11-like
LOC121406212	0.0538435	0.0254739	0.0265277	0.0411519	0.0434645	0.0494774	0.0109802	0	0	0.17566	synaptotagmin-12-like
LOC121418961	0.156452	0.71157	0.173803	0.272036	0.143507	0.252905	0.233844	0.102585	0.0238622	0.088728	synaptotagmin-14-like
LOC121431832	0.00170207	0	0	0	0	0	0.0105764	0	0	0.73345	synaptotagmin-15-like
LOC121432000	0.0131136	0.00267812	0.006616	0.00703652	0.0153023	0.00514589	0.37766	0	0	1.18726	synaptotagmin-15-like
LOC121410540	0.0181583	0.0762473	0.0386339	0.0803003	0.0115765	0.0184676	0	0	0	0	synaptotagmin-1-like
LOC121405894	0.421816	1.17108	0.195544	0.556157	0.214694	0.619263	1.55917	0.398676	0.106874	22.4529	synaptotagmin-1-like
LOC121406164	0.0059058	0.0861982	0.00562044	0	0	0	0	0	0.122261	0	synaptotagmin-2-like
LOC121406117	0.00775925	0.00256936	0.0043642	0.030433	0	0	0	0	0	1.93605	synaptotagmin-5-like
LOC121405753	0.0180321	0.110741	0.00394354	0.0398312	0.00664853	0.0230506	0	0	0	0	synaptotagmin-7-like
LOC121413911	0.234148	1.05769	0.312483	0.263259	0.150816	0.19525	0.25216	0.390308	2.68385	0.195986	synaptotagmin-like_protein_4
LOC121423051	0.0300898	0.03541	0.00714281	0.0203507	0	0.00451745	0.0748244	0	0	0	40-kDa_huntingtin-associated_protein-like
LOC121405912	0.0217493	0.133621	0.0168307	0.00492203	0.0141064	0.0162307	0.0313949	0.0517675	0	0	43_kDa_receptor-associated_protein_of_the_synapse-like
LOC121406027	0	0.0102701	0	0.0080781	0	0.00643853	0	0	0	0	43_kDa_receptor-associated_protein_of_the_synapse-like
LOC121416260	0	0	0.0209194	0	0	0	0	0.0204496	0.101395	0	5-hydroxytryptamine_receptor_1B-like
LOC121416292	0	0	0.0256645	0	0	0	0	0.0900674	0.56666	0	5-hydroxytryptamine_receptor_1D-like
LOC121421635	0	0	0.0166135	0	0	0	0	0	0.335157	0	5-hydroxytryptamine_receptor_1D-like
LOC121425688	0	0.109414	0.0130547	0.00634158	0	0.0492068	0	0	0.0611307	0	5-hydroxytryptamine_receptor_1D-like
LOC121431011	0.00811434	0.0126627	0	0.03157	0	0.00617951	0.0266433	0	0	1.15215	5-hydroxytryptamine_receptor_1D-like
LOC121431454	0.00708817	0.11635	0.554058	0.016209	0.0174509	0.0775924	0	0.875642	0	0	5-hydroxytryptamine_receptor_1E-like
LOC121409037	0.00225323	0.0644246	0.00391577	0	0.00689205	0	0.00791751	0	0	0	5-hydroxytryptamine_receptor_1F-like
LOC121409038	0.00626523	0.0436185	0.0430431	0.00786252	0	0	0	0.0997933	1.14035	0	5-hydroxytryptamine_receptor_1F-like
LOC121425037	0.00999252	0.0036752	0.00896565	0	0	0	0.0105858	0	0	0	5-hydroxytryptamine_receptor_1F-like
LOC121429508	0.00423826	0.0402079	0	0.0245135	0.012352	0.0149896	0	0	0	0.260952	5-hydroxytryptamine_receptor_2A-like
LOC121410385	0.142299	0.108065	0.252173	0.0844791	0.0922194	0.10874	0.146482	0.417714	0.579819	0.34968	5-hydroxytryptamine_receptor_2B-like
LOC121409273	0.0415521	0.122011	0.965025	0.120762	0.0880297	0.0722867	0.116463	1.73919	0.393921	0	5-hydroxytryptamine_receptor_4-like
LOC121426731	0	0.000980686	0.0226028	0.00853563	0	0	0.00646436	0.282549	0	0	5-hydroxytryptamine_receptor_4-like
LOC121420478	0.0367578	0.0874544	0.0795863	0.0994384	0.00913075	0.0729679	0.0399456	0.40154	0	0	5-hydroxytryptamine_receptor_6-like
LOC121422218	0	0	0.00699186	0.00975241	0	0	0.00187601	0.0657242	0	0	5-hydroxytryptamine_receptor_7-like
LOC121407015	0.0103247	0.030603	0.293637	0.0114976	0.0126679	0.010369	0	0	0	0	neuronal_acetylcholine_receptor_subunit_alpha-10-like
LOC121413770	0.00522575	0.0424989	0.00595361	0.003533	0	0.00617951	0.0165006	0	0	0	neuronal_acetylcholine_receptor_subunit_alpha-10-like
LOC121413950	0.00994488	0	0.0134944	0.015932	0.0359836	0.019415	0.0627177	0.0135826	0	0	neuronal_acetylcholine_receptor_subunit_alpha-10-like
LOC121423528	0.00333944	0	0	0.00406992	0	0	0	0	0.184557	0	neuronal_acetylcholine_receptor_subunit_alpha-10-like
LOC121425640	0	0	0	0.00277792	0	0.00780297	0	0	0	1.06393	neuronal_acetylcholine_receptor_subunit_alpha-10-like
LOC121427616	0	0.00500905	0.00197579	0.0105756	0	0	0.0161008	0	0	0	neuronal_acetylcholine_receptor_subunit_alpha-10-like
LOC121406983	0.00313249	0.00416179	0.0019353	0	0	0	0	0	0	0.800154	neuronal_acetylcholine_receptor_subunit_alpha-2-like
LOC121407460	0.276375	0.105402	0.0289585	0.321548	0.399571	0.523365	0.344354	0	0.0416722	0	neuronal_acetylcholine_receptor_subunit_alpha-3-like
LOC121408551	0.00287118	0.0104435	0	0	0	0	0	0	0	0	neuronal_acetylcholine_receptor_subunit_alpha-3-like
LOC121429806	0.0170266	0.449524	0.0232398	0.00706112	0.0174271	0.00371305	0.0302354	0	0	0	neuronal_acetylcholine_receptor_subunit_alpha-3-like
LOC121419309	0.00791655	0.0972454	0.0150954	0	0	0	0	0	0	0	neuronal_acetylcholine_receptor_subunit_alpha-7-like
LOC121415820	0	0	0.00454587	0	0.00843719	0	0	0	0.236253	0	neuronal_acetylcholine_receptor_subunit_alpha-9-like
LOC121412666	0.0944787	0.0241951	0.0135809	0.0307757	0.0191723	0.0173078	0.0139844	0	0	0	neuronal_acetylcholine_receptor_subunit_beta-3-like
LOC121413973	0.0390767	0.0584846	0.00547959	0.0610468	0.0535981	0.0819053	0.0362533	0	0	0	neuronal_acetylcholine_receptor_subunit_beta-3-like
LOC121415499	0.0134573	0.258575	0.0147985	0	0	0	0.159286	0	0	0.706576	neuronal_acetylcholine_receptor_subunit_beta-4-like
LOC121419139	0.00497677	0.0715298	0.0376316	0.00920183	0.00811915	0.0473026	0	0	0	0	acetylcholine_receptor_subunit_alpha-like_2
LOC121418676	0	0.00282579	0	0	0	0.00733201	0.0316276	0	0	0	muscarinic_acetylcholine_receptor_M1-like
LOC121425933	0	0.0156381	0.0178957	0	0	0	0	0	0	0	muscarinic_acetylcholine_receptor_M2-like
LOC121406537	0.00245537	0	0.245487	0	0	0.0118388	0	0.100161	0	0	muscarinic_acetylcholine_receptor_M4-like
LOC121406550	0	0	0.0156434	0.00304856	0	0	0	0	0.0238622	0	muscarinic_acetylcholine_receptor_M4-like
LOC121411255	0	0	0	0.00255366	0	0.00834895	0	0	0	0	acetylcholinesterase-like
LOC121423306	0.00625278	0	0.00525828	0.0097528	0	0.0237972	0	0	0	0	acetylcholinesterase-like
LOC121423057	0.0105882	0.0489541	0	0.029173	0	0	0	0	0	0	acetylcholinesterase-like
LOC121422247	0.00489584	0.00810975	0	0.00705741	0	0	0	0	0	0	acetylcholinesterase-like
LOC121423202	0.0018762	0.0423166	0.00727575	0.00510733	0.0174174	0.00967957	0	0	0	0	acetylcholinesterase-like
LOC121429585	0.00497876	0.315393	0.00293205	0.0145144	0.0131971	0	0.0387955	0	0.417014	0.17566	acetylcholinesterase-like
LOC121422503	0.00170888	0	0.00221526	0	0	0	0.0204058	0	0	0	D(1)_dopamine_receptor-like
LOC121425084	0.0165743	0.24249	0.034671	0	0.0161153	0.00754098	0.0686077	0	0	0.675582	D(1)_dopamine_receptor-like
LOC121425021	0.00358743	0.0924217	0	0	0	0	0	0	0	0.195986	D(1)_dopamine_receptor-like
LOC121406602	0.0156971	0.00322714	0.00944753	0.00819905	0.00553435	0.0088845	0	0.0103586	0	1.91675	D(2)_dopamine_receptor_A-like
LOC121426245	0.00111457	0.0038698	0.0151317	0	0	0	0	0.1945	0	0	D(2)_dopamine_receptor_B-like
LOC121419135	0	0.0350677	0.0121839	0.00285054	0	0.00377588	0.00340039	0.0900674	0	0	D(2)_dopamine_receptor-like
LOC121429212	0	0	0.00822724	0.0177592	0	0.00851022	0	0.0338049	0	0	dopamine_beta-hydroxylase-like
LOC121414817	0.0236118	0.009791	0	0.0123413	0.0126792	0.0261044	0.0480592	0	0	0	dopamine_D2-like_receptor
LOC121424975	0	0	0	0	0	0	0	0	0	0	dopamine_receptor_2-like
LOC121427181	0	0.0168875	0	0.00618925	0	0	0	0	0	0	dopamine_receptor_4-like
LOC121427391	6.95251	10.4036	11.4917	9.50651	8.23309	8.19431	8.39267	16.6131	14.6303	37.8819	gamma-aminobutyric_acid_receptor-associated_protein
LOC121408331	0.54597	1.25029	1.20192	0.846431	0.49196	0.566676	0.523192	2.2618	1.49684	1.48792	gamma-aminobutyric_acid_receptor-associated_protein-like_2
LOC121428858	0.00713823	0.030153	0.0139416	0.0430732	0.0173984	0.0403512	0.095581	0	0	0	gamma-aminobutyric_acid_type_B_receptor_subunit_1-like
LOC121416730	0	0.0963445	0.00510366	0.0511867	0.0294659	0.040686	0.067286	0	0	0	gamma-aminobutyric_acid_type_B_receptor_subunit_2-like
LOC121421674	0.0477657	0	0	0.010498	0.0489007	0.0199124	0.00799192	0	0	0	gamma-aminobutyric_acid_type_B_receptor_subunit_2-like
LOC121415635	0.0549492	1.0273	0.0258562	0.0252399	0.00800341	0.0449206	0.0204169	0	0	0	glutamate_receptor_1-like
LOC121415638	0.00953874	0.672932	0.0102876	0.00915179	0.00882189	0.00710767	0.0560238	0	0.093423	0	glutamate_receptor_1-like
LOC121415639	0.18645	2.87421	0.0552471	0.241536	0.131508	0.18463	0.0791062	0.0687015	0	0.088728	glutamate_receptor_1-like
LOC121415634	0.205652	2.26087	0.053135	0.278244	0.175325	0.198981	0.164784	0.247446	0.270797	0.373442	glutamate_receptor_3-like
LOC121406839	0	0	0	0	0	0	0	0	0	4.49941	glutamate_receptor_ionotropic,_kainate_2-like
LOC121413234	0	0.0304996	0	0	0	0	0.021048	0	0	0	metabotropic_glutamate_receptor_1-like
LOC121413962	0.0109072	0	0	0.0215871	0.00793663	0.0218388	0	0	0	0	metabotropic_glutamate_receptor_2-like
LOC121410981	0	0.00722513	0	0	0	0.00771018	0.0105259	0.0135826	0	1.23303	metabotropic_glutamate_receptor_3-like
LOC121413160	0	0.0121222	0	0	0	0.00760103	0.0363393	0	0	0	metabotropic_glutamate_receptor_3-like
LOC121429617	0.0149742	0.068368	0	0.00456608	0	0.00786368	0.0653778	0	0	0	metabotropic_glutamate_receptor_3-like
LOC121427704	0	0	0	0	0	0	0	0	0	0.8719	metabotropic_glutamate_receptor_8-like
Total Expression	21.4997	58.0555	28.1859	26.4353	19.7615	26.4374	29.8663	37.7906	36.5609	180.672
Endodermal Markers
LOC121406173	0	0	0	0	0	0	0.00531463	0	0	0	Endo16 (uncharacterized_LOC121406173)
LOC121428657	0	0.0149955	0	0.00987669	0	0.00742369	0.00751848	0.0135826	0.16774	0	hepatocyte_nuclear_factor_4-alpha-like (FOXA1)
LOC121419318	0.0148342	0.508142	0	0	0	0	0.0100922	0.0204496	0	0	hepatocyte_nuclear_factor_3-beta-like (FOXA2)
Total Expression	0.0148342	0.523138	0	0.00987669	0	0.00742369	0.0229253	0.0340322	0.16774	0
Stem Cell Markers
LOC121408828	0.0783342	0.09444	0.0260977	0.0252224	0.119381	0.0720987	0	0	0	0	protein_nanos-like
LOC121408762	1.90192	1.07017	0.555357	1.73052	1.29272	1.82765	1.24727	0.811264	0.328703	0	piwi-like_protein_1
LOC121431753	0.179847	0.15582	0.0662802	0.0951214	0.0744101	0.1522	0.201262	0.779653	0.0508958	0	piwi-like_protein_1
LOC121424246	0.475819	0.172606	0.16796	0.344924	0.301205	0.277333	0.269379	0.178918	0.172218	0.172224	probable_ATP-dependent_RNA_helicase_DDX4
Total Expression	2.63592	1.49303	0.815695	2.19579	1.78771	2.32928	1.71791	1.76983	0.551817	0.172224
Cell Cycle and Cell Proliferation
LOC447797	0.167381	0.0462332	0.0128059	0.026097	0.00428779	0.0210717	0.00340039	0	0	0	cyclin_B
LOC121426133	0	0.0228502	0	0	0.00471067	0	0	0	0	0	cyclin_N-terminal_domain-containing_protein_1-like
LOC121429842	0.0650558	0.113689	0.0186805	0.0315669	0.0191384	0.0512967	0.0784445	0	0.144319	0	cyclin-C-like
LOC121407077	0.0424003	0.124232	0.0559253	0.0359045	0.0314865	0.0379952	0.0823542	0.0135826	0.263878	0	cyclin-D1-binding_protein_1_homolog
LOC121407841	0.0185693	0	0.00725621	0.0065054	0.0116422	0.0144696	0.0471547	0	0	0	cyclin-dependent_kinase_10-like
LOC121427260	1.16749	0.574333	0.748121	1.12228	1.08828	1.06436	1.00545	0.787279	1.03597	0.926811	cyclin-dependent_kinase_11B-like
LOC121426721	0.0420806	0.118611	0.0582729	0.0583087	0.0270523	0.102286	0.0634065	0.064379	0	0	cyclin-dependent_kinase_12-like
LOC121426631	0.28268	0.175595	0.469009	0.306665	0.112899	0.288275	0.239942	0.258414	0.0827157	0.795086	cyclin-dependent_kinase_12-like
LOC121423334	0.121621	0.407091	0.557449	0.162774	0.11821	0.1366	0.20442	7.13008	0.865981	0.195986	cyclin-dependent_kinase_14-like
LOC121410011	0.251288	0.151183	0.163704	0.220259	0.100794	0.329734	0.280617	0.257315	0.109572	0.426699	cyclin-dependent_kinase_17-like
LOC121431660	0.803815	0.347916	0.186089	0.0563697	0.0734002	0.080661	0.0399595	0.0386411	0	0	cyclin-dependent_kinase_1-like
LOC121411322	0.0275086	0.0237883	0.00937152	0.0176941	0.0145869	0	0.0089523	0	0	0	cyclin-dependent_kinase_20-like
LOC121417954	0.0447293	0.108709	0.022106	0.056451	0.0402002	0.0396353	0.017669	0.0555435	0	0	cyclin-dependent_kinase_2-interacting_protein-like
LOC121410761	0.119886	0.0455008	0.0183291	0.109061	0.121852	0.0612507	0.0318763	0	0	0	cyclin-dependent_kinase_2-like
LOC447791	0.0273019	0.0107479	0.0195859	0.0649682	0.0509486	0.0391498	0.0498145	0	0	0	cyclin-dependent_kinase_4
LOC121423575	0.0367953	0.53635	0.891874	0.112952	0.017989	0.0553764	0.0371763	5.57329	0.843939	0.293427	cyclin-dependent_kinase_4_inhibitor_C-like
LOC121426230	0.0470328	0.229362	2.3547	0.0553674	0.0385424	0.0208548	0.24379	5.61832	2.01482	5.19339	cyclin-dependent_kinase_5_activator_1-like
LOC121415104	0.0673459	0.0784134	0.0622468	0.10736	0.065328	0.124461	0.140848	0	0.223052	0.260952	cyclin-dependent_kinase_7-like
LOC121414188	0.0678225	0.0678432	0.0258125	0.0871113	0.0556845	0.0836191	0.061315	0.238877	0	0	cyclin-dependent_kinase_8-like
LOC121414213	0.0284032	0.0282665	0.0151696	0.0365045	0.00492119	0.0227395	0.0368775	0	0.541594	0	cyclin-dependent_kinase_8-like
LOC121428575	0.171808	0.0525621	0.102238	0.201569	0.15172	0.151642	0.164468	0.290895	0.147919	0	cyclin-dependent_kinase_9-like
LOC121419122	0.301824	0.865874	0.0950855	0.362962	0.234151	0.361797	0.30767	0.133167	0.383172	0	cyclin-dependent_kinase-like_1
LOC121431955	0.317461	0.340971	0.0914092	0.372204	0.164253	0.46575	0.425931	0.027261	0	0	cyclin-dependent_kinase-like_4
LOC121411466	0.0286812	0.0143486	0.00945095	0.0220816	0.00843708	0.067919	0.0388266	0	0.0747429	0	cyclin-dependent_kinase-like_5
LOC121420139	0.055594	0.00293868	0.0162366	0.00438393	0.00823829	0.010007	0	0	0	0	cyclin-dependent_kinases_regulatory_subunit-like
LOC121426126	0.544771	0.32256	0.356142	0.215719	0.377453	0.259467	0.412975	0.0830706	0.152291	0.472247	cyclin-dependent-like_kinase_5
LOC121422417	0.406753	0.1384	0.202306	0.0101172	0.00574703	0.00818978	0.00772334	0.0204496	0	0	cyclin-F-like
LOC121412378	0.633506	0.470188	0.0917326	0.281472	0.18515	0.334473	0.303265	0.0644515	0.152265	0	cyclin-G2-like
LOC121423665	0.058367	0.0885219	0.0991655	0.071506	0.0630553	0.0574868	0.0719776	0.167456	0	0	cyclin-G-associated_kinase-like
LOC121411123	0.104733	0.0786018	0.094402	0.119807	0.155542	0.0716805	0.0715399	0.0709008	0.409831	0	cyclin-H-like
LOC121411174	0.0679155	0.0219152	0.0631507	0.024077	0.0560649	0.0723561	0.075665	0	0.342384	0	cyclin-H-like
LOC121412352	0.943092	1.74199	1.24325	0.908854	0.736768	0.860803	1.02088	1.18144	3.37549	0.785433	cyclin-I-like
LOC121425323	0.0267924	0.0917291	0.0584221	0.0583871	0.0440505	0.0319338	0.0741013	0.105577	0	0.248509	cyclin-J-like
LOC121418540	0.0527025	0.052708	0.0693858	0.114436	0.0312596	0.0654504	0.0457104	0.123139	0	0	cyclin-K-like
LOC121427906	0.897963	0.879843	1.29924	1.07837	0.567701	0.78023	0.889766	1.40941	0.599031	0.479563	cyclin-L1-like
LOC121410950	0.0633355	0.0409849	0.0652247	0.0814967	0.0927826	0.11517	0.0852107	0	0	0.195986	cyclin-Q-like
LOC121410316	1.38647	1.03074	1.14321	1.32407	0.720784	0.80003	1.07012	1.13908	1.06271	1.71839	cyclin-T2-like
LOC121418372	0.0259476	0.0406666	0.0316684	0.0460619	0.071309	0.0396246	0.0614818	0	0.106874	0	cyclin-Y-like_protein_1
LOC121419845	0.0125678	0.02626	0.00937261	0.0181238	0.0479716	0.0169855	0.0667815	0	0.0843455	0	cyclin-Y-like_protein_1
LOC121405827	2.90574	1.63497	1.77159	3.60709	2.97501	3.31071	1.6946	0.739057	12.5246	0	G1/S-specific_cyclin-D1-like
LOC121408084	0.239359	0.105373	0.0580933	0.125809	0.051625	0.0902798	0.0438992	0.140664	0.189592	0	G1/S-specific_cyclin-E
LOC121419378	0.0861103	0.0692541	0.0286265	0.0227965	0.0425375	0.0589741	0.0234545	0	0	0	G2/mitotic-specific_cyclin_S13-7-like
LOC121409442	0.490969	0.0829852	0.101977	0.00787706	0.0121076	0.0168209	0.0525903	0.0687015	0	0	G2/mitotic-specific_cyclin-A-like
LOC121410426	0.211721	0.0425759	0.0334365	0.0194817	0.0107626	0	0	0	0.093423	0	G2/mitotic-specific_cyclin-A-like
LOC121429467	1.0693	0.382327	0.266124	0.033136	0.0443414	0.0473292	0.0375061	0	0.0611307	0	G2/mitotic-specific_cyclin-B3-like
LOC121416277	0.281567	0.115172	0.086984	0.134618	0.0483073	0.019773	0.00834599	0	0	0	G2/mitotic-specific_cyclin-B-like
LOC121410158	0.122579	0.0575431	0.0551733	0.0487237	0.0118173	0.0173764	0.0162281	0.0337535	0	0.293427	G2_and_S_phase-expressed_protein_1-like
LOC121429452	0.957472	0.266727	0.235814	0.121661	0.18811	0.116242	0.0767053	0	0.307449	0.248509	DNA_polymerase_alpha_catalytic_subunit-like
LOC121418141	0.366239	0.0140988	0.0562431	0.0156385	0.0413812	0.0495122	0.00772334	0.0947904	0	0	DNA_polymerase_alpha_subunit_B-like
LOC121431843	0.0641394	0.123946	0.0567226	0.0739832	0.0309379	0.088931	0.0446738	0.0555435	0.247284	0	DNA_polymerase_beta-like
LOC121421151	0.273593	0.108631	0.0834934	0.0734189	0.0689435	0.0661644	0.054303	0.0638717	0	0	DNA_polymerase_delta_catalytic_subunit-like
LOC121422360	0.165168	0.118796	0.123459	0.0736467	0.0275253	0.150924	0.0486036	0.138228	0.0238622	0	DNA_polymerase_delta_subunit_2-like
LOC121429881	1.70454	0.938921	0.713553	0.921785	1.08262	0.908706	0.923458	0.19543	0.963138	0.670735	DNA_polymerase_delta_subunit_3-like
LOC121408448	0.389107	0.838428	0.353992	0.895127	0.925492	1.09342	0.653942	0.387111	0.876504	0.298038	DNA_polymerase_delta_subunit_4-like
LOC121408512	0.174773	0.227562	0.120844	0.228396	0.434292	0.380287	0.366978	0.151401	0.336749	0	DNA_polymerase_delta_subunit_4-like
LOC121419874	0.181991	0.0189506	0.0210721	0.0402198	0.00914705	0.0483617	0.0366825	0	0	0	DNA_polymerase_epsilon_catalytic_subunit_A-like
LOC121418907	0.232082	0.0447713	0.0227715	0.0473102	0.0465458	0.0393083	0	0	0	0	DNA_polymerase_epsilon_subunit_2-like
LOC121428701	1.35674	0.3832	0.385989	0.433655	0.402021	0.524537	0.281945	0.0357733	0.185742	0.230712	DNA_polymerase_epsilon_subunit_3-like
LOC121423997	0.29149	0.0824247	0.0670264	0.0396686	0.0489621	0.0865613	0.0486294	0	0	0	DNA_polymerase_epsilon_subunit_4-like
LOC121418400	0.0725103	0.0553294	0.0166561	0.0147857	0.00735694	0.020259	0.0237715	0	0	0	DNA_polymerase_eta-like
LOC121415721	0.0230262	0.0124365	0.0303192	0.0169897	0.0113612	0.0245386	0.00715087	0	0	0	DNA_polymerase_iota-like
LOC121415844	0.0104462	0.0192742	0.00980112	0.0591571	0.0277947	0.0200822	0.0139105	0	0	0	DNA_polymerase_iota-like
LOC121415332	0.0492623	0.0818951	0.0421117	0.0782834	0.00574222	0.0411513	0.0284739	0.141687	0	0	DNA_polymerase_kappa-like
LOC121425275	0	0	0.004441	0.00335492	0.00587319	0	0	0	0	0	DNA_polymerase_nu-like
LOC121413377	0.0230832	0.0786049	0.00596368	0.00693321	0	0.0235524	0	0.0972498	0	0	DNA_polymerase_theta-like
LOC121431754	2.83552	0.519004	0.254786	0.258308	0.33403	0.456138	0.355856	0.500695	0.56856	0	proliferating_cell_nuclear_antigen-like
LOC121417436	7.59483	2.43839	3.21991	4.15342	4.65468	3.40237	4.2948	1.14013	2.92801	2.02392	proliferation-associated_protein_2G4-like
LOC121430677	1.35369	0.630261	0.492966	2.11672	1.008	1.24408	1.27542	0.392498	0.334205	1.0748	myc_protein-like
LOC121429790	0.0504064	0.0989654	0.0294376	0.0691858	0.0177654	0.0338459	0.0249101	0	0.158308	0	telomerase_reverse_transcriptase-like
Total Expression	33.1069	19.1033	19.587	21.7311	18.2995	19.5251	18.3121	29.2286	32.8154	16.8326
Cilia Markers
LOC121408954	1.01026	0.931748	0.662496	2.12573	1.24262	1.28284	1.3259	0.36046	0.131069	3.1292	tektin-1-like
LOC121423323	0	0.0398666	0	0	0	0	0	0	0	0	tektin-3-like
LOC121423108	0.0138604	0.0472479	0.0209561	0.0383364	0.00422641	0.0380842	0.0214759	0	0	0	tektin-4-like
LOC121430708	0.0382478	0.36604	0.0950682	0.126589	0.120653	0.117408	0.0423183	0.0952892	0	0	tektin-B1-like
LOC121410831	0.212206	0.158021	0.14963	0.0493888	0.0924835	0.135594	0.109836	0.0828622	0	0	cilia-_and_flagella-associated_protein_100-like
LOC121428704	0.0823342	0.27849	0.0129679	0.0613075	0.0484735	0.128503	0.0587957	0.0385677	0	0	cilia-_and_flagella-associated_protein_157-like
LOC121407266	0.044132	0.0425954	0.0149681	0.0351621	0.0111578	0.0475305	0.0078826	0	0	0	cilia-_and_flagella-associated_protein_20
LOC121407328	0.0483057	0.0390032	0.00398752	0.00892975	0.0516614	0.0582061	0.0228546	0	0	0.172224	cilia-_and_flagella-associated_protein_20
LOC121425120	0.00766769	0.0488032	0.00371567	0	0.00451028	0.0245824	0.00854859	0	0	0	cilia-_and_flagella-associated_protein_206-like
LOC121426156	0.108889	0.0544515	0.0240663	0.175971	0.0797926	0.238965	0.171639	0	0.0416722	0	cilia-_and_flagella-associated_protein_221-like
LOC121409153	0.0997518	0.362327	0.0691138	0.0566582	0.0515348	0.0710407	0.155768	0	0.144944	0	cilia-_and_flagella-associated_protein_251-like
LOC121411688	0	0	0.125514	0	0	0	0	0.396584	0	0	cilia-_and_flagella-associated_protein_251-like
LOC121426620	0.0432359	0.10099	0.030253	0.00524957	0.0120477	0.0190343	0.00798334	0	0	0.260952	cilia-_and_flagella-associated_protein_251-like
LOC121413236	0.0478804	0.0124365	0.0178135	0.0134466	0.0546242	0.0375357	0.0204659	0	0	0	cilia-_and_flagella-associated_protein_298-like
LOC121413297	0.00151054	0.0408049	0.00620082	0	0	0	0	0	0.0238622	0	cilia-_and_flagella-associated_protein_298-like
LOC121431907	0.0323817	0.0277825	0	0.00194787	0.00964149	0.0178949	0.0405631	0	0	0	cilia-_and_flagella-associated_protein_299-like
LOC121429496	0.04076	0.143237	0.00678591	0.0931412	0.00762051	0.0286121	0.0830314	0.0506559	0	0	cilia-_and_flagella-associated_protein_300-like
LOC121418368	0.352479	0.432911	0.025173	0.259433	0.397301	0.357288	0.470794	0.0385677	0	0.230712	cilia-_and_flagella-associated_protein_36-like
LOC121410594	0.212697	0.14165	0.0572928	0.127985	0.233731	0.179824	0.0866625	0.0256766	0.0787948	0.337237	cilia-_and_flagella-associated_protein_410-like
LOC121424756	0.0133236	0.0387658	0.0025704	0.0179475	0	0.0252945	0	0.0675069	0	0.619425	cilia-_and_flagella-associated_protein_43-like
LOC121420304	0.183707	0.366631	0.0593452	0.173966	0.147194	0.192363	0.167652	0.0771711	0.074758	0	cilia-_and_flagella-associated_protein_45-like
LOC121424906	0.0432993	0.0216666	0.002147	0.0378301	0.0109379	0.0186338	0.0141564	0	0	0	cilia-_and_flagella-associated_protein_46-like
LOC121413871	0.0157199	0.0340778	0	0.00660374	0.00695786	0.00372593	0	0	0	0	cilia-_and_flagella-associated_protein_47-like
LOC121422444	0.132351	0.234991	0.0202707	0.0578472	0.104875	0.0672432	0.0115611	0	0	0	cilia-_and_flagella-associated_protein_52-like
LOC121416078	0.0122565	0	0	0	0.0148148	0.0166849	0	0	0	0	cilia-_and_flagella-associated_protein_53-like
LOC121416185	0.105004	0.145441	0.0142938	0.103282	0.101377	0.104859	0.156976	0.0571211	0	0	cilia-_and_flagella-associated_protein_53-like
LOC121411757	0.0140792	0.0769168	0.0102699	0.0255715	0	0.0447334	0	0	0	0	cilia-_and_flagella-associated_protein_54-like
LOC121423609	0.020827	0.122117	0.00394066	0.0153504	0.0252819	0.0316988	0.0371948	0	0	0	cilia-_and_flagella-associated_protein_57-like
LOC121424796	0.108063	0.187836	0.0215388	0.111367	0.0474096	0.0934115	0.0592103	0	0	0	cilia-_and_flagella-associated_protein_58-like
LOC121418301	0.00682953	0.0583808	0.0131942	0.00704035	0.00455285	0.00573598	0.0191761	0	0	0	cilia-_and_flagella-associated_protein_61-like
LOC121425818	0.0276041	0.0672359	0.0209	0.0108481	0.0555897	0.0156146	0.0951128	0	0.365718	0.230712	cilia-_and_flagella-associated_protein_65-like
LOC121426561	0.0861121	0.307995	0.0704755	0.0638333	0.0341299	0.0707245	0.0234441	0.0695268	0	0	cilia-_and_flagella-associated_protein_69-like
LOC121419134	0.132966	0.304309	0.0489168	0.0887674	0.130337	0.052311	0.129566	0.377428	0	0	cilia-_and_flagella-associated_protein_70-like
LOC121428207	0.0395805	0.149828	0.0327393	0.0636605	0.0656228	0.132467	0.0767229	0.0337535	0	0	cilia-_and_flagella-associated_protein_74-like
LOC121429102	0	0.107841	0	0.00926944	0.023149	0.0158568	0	0	0	0	cilia-_and_flagella-associated_protein_77-like
LOC121420140	0.0390849	0.0584352	0.00553345	0.059355	0.0324696	0.0719228	0.116807	0.0434145	0	0	cilia-_and_flagella-associated_protein_91-like
LOC121410045	0.0422684	0.063403	0.0096524	0.0349788	0.0365804	0.0337879	0.0122958	0	0	0	cilia-_and_flagella-associated_protein_97-like
LOC121424926	0.261606	0.226624	0.111784	0.177747	0.128603	0.232202	0.18818	0.0606581	0	0	cilia-_and_flagella-associated_protein_99-like
LOC121420415	0.0450133	0.0802191	0.0166742	0.053061	0.0246983	0.0230603	0.0183551	0.0502892	0.125603	0	cilia-_and_flagella-associated_protein_HOATZ-like
LOC121424851	0.0113141	0.0439125	0.00402655	0.0622069	0.0106578	0.018972	0.0266779	0	0	0	ciliary-associated_calcium-binding_coiled-coil_protein_1-like
LOC121424379	0.0660866	0.182764	0.0965579	0.120299	0.0330586	0.073523	0.0822896	0.124851	0	0	ciliogenesis_and_planar_polarity_effector_1-like
LOC121407951	0.0618909	0.0871894	0.0615117	0.0703511	0.119653	0.129709	0.048571	0.0655508	0.0911344	0.381534	ciliogenesis_and_planar_polarity_effector_2-like
LOC121426192	0.191928	0.173216	0.0972756	0.186917	0.192969	0.153226	0.182286	0.0671916	0.0238622	0.402936	ciliogenesis-associated_TTC17-interacting_protein-like
LOC121418980	0.0507404	0.106355	0.00370833	0.064747	0.0550915	0.0647871	0.0257734	0.0204496	0	0	33_kDa_inner_dynein_arm_light_chain,_axonemal
LOC121420563	0.0929489	0.0518781	0.0164753	0.0948914	0.0646029	0.075785	0.0380297	0	0	0	33_kDa_inner_dynein_arm_light_chain,_axonemal
LOC121417453	0.0110761	0.0118451	0.0207463	0.0155976	0	0.010533	0.0152391	0	0	0.230712	dynein_assembly_factor_1,_axonemal-like
LOC121417498	0.0205992	0.0252154	0	0.0215729	0.00689205	0.0130151	0.0398052	0	0	0	dynein_assembly_factor_1,_axonemal-like
LOC121413277	0.0135604	0.0285685	0.00372442	0.0266065	0.00587319	0.0171683	0.00421169	0	0	0	dynein_assembly_factor_3,_axonemal-like
LOC121415243	0.251507	0.191919	0.0952187	0.142622	0.0939979	0.16086	0.173402	0.0832763	0.0508958	0.230712	dynein_assembly_factor_4,_axonemal-like
LOC121408229	0.0499603	0.00562768	0.00457927	0.00765059	0.0146056	0.0286603	0.00314808	0.0560175	0.103614	0	dynein_assembly_factor_6,_axonemal-like
LOC121419901	0.0193924	0.0378984	0.00162377	0.0321104	0.0323313	0.058426	0.023669	0.0728502	0	0	dynein_axonemal-associated_protein_1-like
LOC121422823	0.0532261	0.142238	0.00370833	0.0612649	0.0427796	0.0443541	0.0219328	0	0	0	dynein_beta_chain,_ciliary
LOC121420510	0.026346	0.00447768	0.0210748	0.0197346	0.00729271	0.0124067	0.0135713	0.0567215	0	0	dynein_beta_chain,_flagellar_outer_arm-like
LOC121419755	0.016201	0.0240662	0	0.00199344	0	0.0233003	0	0	0	0	dynein_beta_chain,_flagellar_outer_arm-like
LOC121422261	0.0256898	0.0622192	0.00261951	0.0232777	0.0327207	0.0114788	0.039941	0	0	0	dynein_heavy_chain_1,_axonemal-like
LOC121408397	0.0239816	0.179644	0	0.0188301	0.00823829	0.0113875	0.0379672	0.0258837	0	0.230712	dynein_heavy_chain_10,_axonemal-like
LOC121408461	0.0355338	0.208572	0.0366929	0.0383803	0.0212946	0.0320924	0.0897275	0	0	0.195986	dynein_heavy_chain_10,_axonemal-like
LOC121410131	0.0117735	0.0202833	0.00433209	0.049812	0	0.00553459	0.0237715	0	0	0	dynein_heavy_chain_12,_axonemal-like
LOC121410141	0.0161923	0.0741455	0.0131393	0.0170433	0.00423163	0	0.0273419	0	0	0	dynein_heavy_chain_12,_axonemal-like
LOC121429563	0.0596241	0.140153	0.00685955	0.0365526	0.0244188	0.0828187	0.00992229	0.0185534	0	0	dynein_heavy_chain_2,_axonemal-like
LOC121410272	0.104073	0.115153	0.0366703	0.146938	0.0624378	0.103532	0.130375	0	0	0	dynein_heavy_chain_3,_axonemal-like
LOC121422358	0.0149261	0.254076	0.0205461	0.019895	0.0468493	0.0384415	0.0109189	0	0	0	dynein_heavy_chain_3,_axonemal-like
LOC121408153	0.107428	0.37505	0.0802071	0.147161	0.0518348	0.135729	0.138081	0.0927303	0	0	dynein_heavy_chain_5,_axonemal-like
LOC121413891	0.00398728	0.0204856	0	0.0179674	0.00638809	0.0202274	0.029164	0	0	0	dynein_heavy_chain_5,_axonemal-like
LOC121413974	0.0128707	0.0166557	0	0.0464192	0.0271381	0.0214217	0	0	0	0	dynein_heavy_chain_5,_axonemal-like
LOC121409928	0.00405393	0.0428036	0.0019353	0.0106606	0	0.0067715	0.028323	0	0	0	dynein_heavy_chain_6,_axonemal-like
LOC121409978	0.0268596	0.101488	0.00904618	0.0221894	0.00820867	0.0212496	0.0167795	0	0	0	dynein_heavy_chain_6,_axonemal-like
LOC121419079	0.0423719	0.0964107	0.00372442	0.0346944	0.0334242	0.0111872	0	0	0	0.230712	dynein_heavy_chain_6,_axonemal-like
LOC121423875	0.148879	0.574802	0.0844486	0.160787	0.088095	0.130488	0.116312	0.111236	0.324403	0.230712	dynein_heavy_chain_7,_axonemal-like
LOC121413912	0.0466427	0.0485981	0.0145675	0.0401867	0.0213076	0.0268846	0.134111	0	0	0.230712	dynein_heavy_chain_8,_axonemal-like
LOC121415364	0.00782346	0.0167269	0.015254	0.0131579	0	0.00594229	0	0	0	0	dynein_heavy_chain_8,_axonemal-like
LOC121426935	0.0567123	0.0789293	0.0341036	0.0552898	0.0300891	0.0644377	0.0590563	0	0.0747429	0	dynein_heavy_chain_domain-containing_protein_1-like
LOC121415092	0.0118984	0.0396855	0.0338939	0.0201932	0.017887	0.033318	0.0659612	0.0385677	0	0	dynein_intermediate_chain_2,_ciliary
LOC121423597	0.0395287	0.0538494	0.0938257	0.0604391	0.0292301	0.0651505	0.0598191	0	0.0508958	0	dynein_intermediate_chain_3,_axonemal-like
LOC121422702	0.0677731	0.0698862	0.0287966	0.0278337	0.0855476	0.0560701	0.00314808	0	0	0	dynein_intermediate_chain_3,_ciliary-like
LOC121422099	0.371024	0.194636	0.308163	0.190515	0.154009	0.170523	0.158819	0.444584	0.16314	0	dynein_intermediate_chain_CFAP94,_axonemal-like
LOC121418439	0.0989654	0.165488	0.0264235	0.139404	0.0694468	0.0836055	0.0677048	0.0657242	0	0	dynein_light_chain_1,_axonemal-like
LOC121422197	0.0605372	0.106124	0.00674053	0.031042	0.00778508	0.0493619	0.0143395	0.0681292	0	0	dynein_light_chain_4,_axonemal-like
LOC121423961	0.0257911	0.00650114	0.012638	0.00593735	0.0267208	0.0145001	0.0224423	0.0450171	0	0	dynein_light_chain_Tctex-type_5-B-like
LOC121429729	0.0953964	0.211479	0.0338956	0.0838098	0.0839539	0.107314	0.148466	0	0	0	dynein_light_chain_Tctex-type_protein_2B-like
LOC121409224	0.0981427	0.129571	0.0184325	0.0959359	0.125882	0.150396	0.0124749	0	0	0	dynein_regulatory_complex_protein_10-like
LOC121410997	0.0914206	0.308761	0.0403178	0.138832	0.125564	0.115164	0.06465	0	0	0	dynein_regulatory_complex_protein_11-like
LOC121428221	0.299979	0.226284	0.187333	0.222749	0.132278	0.131324	0.102145	0.0103586	0.406324	0.852374	dynein_regulatory_complex_protein_1-like
LOC121418796	0.144435	0.163847	0.0264584	0.0505392	0.0769956	0.137525	0.0654947	0	0.093423	0	dynein_regulatory_complex_protein_8-like
LOC121429395	0.235005	0.277689	0.040554	0.275909	0.178524	0.285583	0.311632	0.0813491	0.144944	0	dynein_regulatory_complex_protein_9-like
LOC121409271	0.0769108	0.138381	0.0117302	0.0804123	0.085327	0.144052	0.0985224	0	0	0	dynein_regulatory_complex_subunit_2-like
LOC121422692	0.00887517	0.0586498	0	0.00316608	0.0175774	0.0104417	0.031746	0.1457	0	0	dynein_regulatory_complex_subunit_3-like
LOC121408058	0.187353	0.327496	0.0283191	0.140742	0.12828	0.214747	0.093345	0.0357733	0	0.834918	dynein_regulatory_complex_subunit_4-like
LOC121415314	0.00293793	0.0131908	0	0.00686401	0.033748	0.00451389	0	0.0386411	0	0	dynein_regulatory_complex_subunit_6-like
LOC121418769	0.0864308	0.379354	0.0264585	0.105303	0.112019	0.0867538	0.0777266	0.0691138	0.309147	0	dynein_regulatory_complex_subunit_7-like
Total Expression	7.4149	12.3354	3.50861	7.80504	6.05391	7.50996	6.74976	3.7638	2.82295	9.03249
Miscellaneous Growth Factors (and other genes) of Interest
LOC121405581	0.707463	0.447443	0.485253	1.00205	0.615122	1.11787	0.959417	0.708648	0.0416722	0.692593	bone_morphogenetic_protein_1_homolog
LOC121432040	0.0438685	0.0977323	0	0.00580678	0	0.0485846	0.0353326	0	0	0	bone_morphogenetic_protein_2-like
LOC121432277	0.00664515	0.0203083	0.00865668	0	0	0.00366162	0	0	0	0	bone_morphogenetic_protein_3-like
LOC446159	0.053328	0.0412189	0.0357129	0.00682523	0.0196091	0.112216	0.0496053	0	0	0	bone_morphogenetic_protein_BMP2/4
LOC121431952	0.362682	0.63065	0.333666	0.405999	0.46076	0.430581	0.550642	0.417556	0.338621	0.195986	bone_morphogenetic_protein_receptor_type-1B-like
LOC121411232	0.244564	0.318674	0.19161	0.225836	0.135778	0.238857	0.257314	0.371863	0.223739	0	bone_morphogenetic_protein_receptor_type-2-like
LOC121424566	0.0701064	0.0177736	0.00403664	0.203723	0.266004	0.19147	0.163437	0	0	0	growth/differentiation_factor_8-like
LOC121423913	0.0539501	1.19353	0.00780434	0.0613682	0.0482871	0.171592	0.00340039	0	0.0416722	0	growth/differentiation_factor_8-like
LOC121423561	0.00484187	0	0.00279167	0.00714049	0.0052086	0.0219302	0.0469061	0	0	0	growth/differentiation_factor_8-like
LOC121426703	0.00809726	1.25978	0.0461531	0.0186827	0.0438259	0.065291	0.0214727	0.144751	0	0	growth/differentiation_factor_8-like
LOC121415689	0.020108	0.121914	0.0183781	0.0451873	0.0300198	0.0255448	0	0	0	0	insulin-like_peptide_receptor
LOC121414980	0.00690018	0.00705774	0	0	0	0.00931786	0	0	0	0	insulin-like_peptide_receptor
LOC121414981	0.0467078	0.0366325	0.00817243	0.029279	0.0627291	0.0320393	0.0254209	0	0	0	insulin-like_peptide_receptor
LOC121415946	0.0051142	0.0255315	0	0.0205439	0	0.00723824	0	0	0	0	fibroblast_growth_factor_receptor_2-like
LOC121419550	0.00236913	0.0278038	0	0	0	0	0	0	0.0787948	0	fibroblast_growth_factor_receptor_3-like
LOC121431286	0	0	0	0	0	0.00224486	0	0	0	0	fibroblast_growth_factor_receptor_3-like
LOC121425598	1.4486	2.15474	0.144065	1.74147	1.13287	1.96874	3.35933	0.178831	0.1929	0	fibroblast_growth_factor_receptor-like
LOC121425416	0.233997	0.264097	0.0108373	0.2438	0.218778	0.396152	0.32537	0.0947366	0	0	fibroblast_growth_factor_receptor-like_1
LOC121405695	0.0163231	0.020145	0.00216386	0	0	0.0213791	0.105101	0	0	0	epidermal_growth_factor_receptor-like

## Sheet: Lv_10FBS_Diff_Expression
Table S6 – Single-cell RNA sequencing of L. variegatus cells cultured in UM with 10% FBS - Differential gene expression in each cluster relative to all other clusters (log2 fold change)
FeatureName	p_val	avg_log2FC	pct.1	pct.2	p_val_adj	cluster	Gene Description
LOC121430633	4.06e-221	2.09501	0.769	0.09	7.2e-217	0	ribonucleoside-diphosphate_reductase_subunit_M2_B-like
LOC121409173	3.3e-160	1.49026	0.749	0.15	5.85e-156	0	centromere_protein_S-like
LOC121411410	2.8e-159	1.62158	0.978	0.563	4.97e-155	0	acidic_leucine-rich_nuclear_phosphoprotein_32_family_member_B-like
LOC121415961	8.56e-153	1.2595	0.621	0.084	1.52e-148	0	chromatin_assembly_factor_1_subunit_A-like
LOC121418947	5.05e-145	1.31683	0.684	0.116	8.95e-141	0	centromere_protein_F-like
LOC121431885	7.65e-143	2.29384	0.815	0.278	1.36e-138	0	histone_H4
LOC121413330	4.84e-139	1.26968	0.58	0.078	8.57e-135	0	histone_H4
LOC121431800	9.82e-138	1.23733	0.998	0.882	1.74e-133	0	histone_H2A.V
LOC121418638	1.17e-136	1.1925	0.638	0.108	2.08e-132	0	claspin-like
LOC121405692	1.56e-135	1.04355	0.523	0.056	2.76e-131	0	inner_centromere_protein_A-like
LOC121407840	1.1e-134	1.76314	0.854	0.334	1.95e-130	0	ribonucleoside-diphosphate_reductase_large_subunit-like
LOC121429467	8.32e-130	0.854845	0.492	0.05	1.47e-125	0	G2/mitotic-specific_cyclin-B3-like
LOC121431754	4.08e-121	1.48821	0.634	0.136	7.23e-117	0	proliferating_cell_nuclear_antigen-like
LOC121422361	5.87e-119	0.858552	0.388	0.026	1.04e-114	0	thymidine_kinase,_cytosolic-like
LOC121419382	1.01e-117	1.35636	0.754	0.23	1.79e-113	0	delta(14)-sterol_reductase_TM7SF2-like
LOC121422913	1.19e-117	1.0715	0.532	0.076	2.11e-113	0	late_histone_H2B.L3
LOC121427468	1.54e-116	1.3887	0.972	0.728	2.73e-112	0	tubulin_beta_chain-like
LOC121415500	2.03e-114	1.23249	0.641	0.131	3.6e-110	0	late_histone_H1
LOC121423169	8.16e-112	1.55802	0.712	0.213	1.45e-107	0	histone_H4
LOC121408790	1.8e-111	1.03041	0.599	0.122	3.2e-107	0	replication_protein_A_70_kDa_DNA-binding_subunit-like
LOC121427597	2.18e-111	0.967483	0.471	0.061	3.86e-107	0	PCNA-associated_factor-like
LOC121424886	3.29e-109	0.959749	0.508	0.076	5.83e-105	0	nascent_polypeptide-associated_complex_subunit_alpha,_muscle-specific_form-like
LOC121424564	4.28e-107	0.91051	0.449	0.057	7.59e-103	0	centromere_protein_C-like
LOC121423171	7.11e-105	0.901708	0.431	0.05	1.26e-100	0	histone_H3,_embryonic
LOC121428948	3.22e-104	0.988201	0.542	0.104	5.7e-100	0	uncharacterized_LOC121428948
LOC121423093	3.58e-101	1.3409	0.627	0.161	6.35e-97	0	DNA_ligase_1-like
LOC446164	3.65e-99	0.796067	0.327	0.022	6.46e-95	0	stem-loop_binding_protein
LOC121426129	4.01e-99	1.1554	0.649	0.177	7.1e-95	0	replication_protein_A_14_kDa_subunit-like
LOC121409399	3.26e-95	1.12619	0.623	0.15	5.77e-91	0	histone_H1-beta,_late_embryonic-like
LOC121429841	2.98e-94	0.81582	0.468	0.075	5.28e-90	0	structural_maintenance_of_chromosomes_protein_4-like
LOC121424941	3.98e-94	0.859004	0.438	0.064	7.05e-90	0	protein_regulator_of_cytokinesis_1-like
LOC121408822	3.72e-93	0.792468	0.386	0.044	6.59e-89	0	histone_H4
LOC121407826	1.17e-90	1.05832	0.66	0.196	2.07e-86	0	tubulin_beta_chain-like
LOC121416840	1.23e-89	0.949722	0.586	0.145	2.18e-85	0	tyrosine-protein_kinase_BAZ1B-like
LOC121424401	8.93e-89	0.778946	0.442	0.071	1.58e-84	0	structural_maintenance_of_chromosomes_protein_2-like
LOC121425571	3.11e-84	0.648698	0.342	0.038	5.51e-80	0	uracil-DNA_glycosylase-like
LOC121422407	5.25e-84	1.4782	0.978	0.839	9.31e-80	0	histone_H1-delta-like
LOC121413465	3.81e-83	0.640639	0.298	0.025	6.74e-79	0	DNA_topoisomerase_2-alpha-like
LOC121419424	1.27e-82	0.639645	0.364	0.048	2.26e-78	0	kinetochore-associated_protein_NSL1_homolog
LOC121409442	2.14e-82	0.510903	0.288	0.022	3.79e-78	0	G2/mitotic-specific_cyclin-A-like
LOC121412152	1.05e-81	0.63896	0.37	0.05	1.86e-77	0	kinesin-like_protein_KIF23
LOC121423589	3.82e-80	1.04948	0.808	0.357	6.77e-76	0	histone-binding_protein_N1/N2-like
LOC121429452	4.41e-80	0.734363	0.403	0.066	7.81e-76	0	DNA_polymerase_alpha_catalytic_subunit-like
LOC121431884	9.66e-80	0.616075	0.314	0.032	1.71e-75	0	histone_H3,_embryonic
LOC121414511	1.35e-77	1.06356	0.924	0.588	2.4e-73	0	tubulin_alpha-2/alpha-4_chain-like
LOC121413951	4.56e-76	0.471667	0.303	0.031	8.08e-72	0	hyaluronan_mediated_motility_receptor-like
LOC121428773	1.62e-74	1.05287	0.536	0.146	2.87e-70	0
LOC121432081	2.41e-74	0.716744	0.512	0.124	4.27e-70	0	transcription_factor_A,_mitochondrial-like
LOC121410241	3.39e-74	0.639034	0.355	0.052	6e-70	0	probable_deoxyuridine_5'-triphosphate_nucleotidohydrolase
LOC121410608	8.28e-74	0.572467	0.349	0.05	1.47e-69	0	protein_Spindly-B-like
LOC121408812	5.07e-73	0.533536	0.272	0.024	8.99e-69	0	histone_H3,_embryonic
LOC121431736	4e-72	1.09534	0.95	0.657	7.09e-68	0	tubulin_alpha-3_chain-like
LOC121429506	2.99e-71	1.06198	0.619	0.213	5.3e-67	0	lymphoid-specific_helicase-like
LOC121426516	1.52e-70	0.578306	0.316	0.041	2.7e-66	0	uncharacterized_LOC121426516
LOC121408983	2.68e-70	0.550777	0.253	0.021	4.75e-66	0	uncharacterized_LOC121408983
LOC121431660	2.01e-69	0.665603	0.338	0.05	3.56e-65	0	cyclin-dependent_kinase_1-like
LOC121408268	2.05e-68	0.574564	0.292	0.035	3.63e-64	0	targeting_protein_for_Xklp2_homolog
LOC121422313	2.93e-68	0.539957	0.281	0.031	5.19e-64	0	baculoviral_IAP_repeat-containing_protein_5-like
LOC121423157	4.74e-68	0.585522	0.366	0.063	8.4e-64	0	kinetochore_protein_Nuf2-like
LOC121416961	1.36e-67	0.702113	0.397	0.077	2.42e-63	0	histone_H4
LOC121414529	1.38e-67	1.00591	0.867	0.487	2.45e-63	0	tubulin_alpha-1_chain-like
LOC121425561	4.44e-67	0.528891	0.288	0.035	7.87e-63	0	condensin_complex_subunit_2-like
LOC121417436	8.72e-67	0.923538	0.95	0.691	1.55e-62	0	proliferation-associated_protein_2G4-like
LOC121419329	3.79e-66	1.07577	0.643	0.251	6.72e-62	0	N-alpha-acetyltransferase_40-like
LOC121423716	1.17e-65	0.80985	0.516	0.149	2.08e-61	0	histone_chaperone_ASF1-like
LOC121418225	1.07e-64	0.46694	0.277	0.032	1.89e-60	0	uncharacterized_LOC121418225
LOC121428701	3.34e-64	0.755496	0.56	0.173	5.92e-60	0	DNA_polymerase_epsilon_subunit_3-like
LOC121423633	8.32e-64	0.602279	0.349	0.063	1.47e-59	0	S-phase_kinase-associated_protein_2-like
LOC121422971	1.11e-63	0.498307	0.316	0.047	1.96e-59	0	late_histone_H2A.L3
LOC121431761	1.28e-63	0.624267	0.314	0.047	2.26e-59	0	proteoglycan_4-like
LOC121424746	2.99e-63	0.531799	0.259	0.028	5.3e-59	0	kinesin-like_protein_KIF11-B
LOC121429063	8.8e-63	0.478074	0.349	0.061	1.56e-58	0	uncharacterized_LOC121429063
LOC121426329	2.34e-58	0.447597	0.333	0.06	4.14e-54	0	rac_GTPase-activating_protein_1-like
LOC121418288	2.41e-58	0.575581	0.49	0.136	4.27e-54	0	barrier-to-autointegration_factor_A-like
LOC121410947	3.43e-58	0.77573	0.95	0.69	6.07e-54	0	high_mobility_group_protein_1_homolog
LOC121410592	1.44e-57	0.69047	0.562	0.193	2.55e-53	0	dihydrofolate_reductase-like
LOC121415377	5.38e-57	0.392617	0.251	0.031	9.53e-53	0	chromosome_segregation_in_meiosis_protein_3-like
LOC121419255	5.07e-55	0.419646	0.255	0.034	8.99e-51	0	uncharacterized_LOC121419255
LOC121428217	2.28e-54	0.767756	0.95	0.776	4.03e-50	0	nucleolin-like
LOC121426442	2.98e-54	0.896516	0.745	0.372	5.28e-50	0	hypoxanthine-guanine_phosphoribosyltransferase-like
LOC121408976	7.34e-52	0.532475	0.351	0.08	1.3e-47	0	replication_factor_C_subunit_5-like
LOC121411829	1.21e-51	0.744119	0.893	0.589	2.14e-47	0	inactive_selenide,_water_dikinase-like_protein
LOC121419350	4.39e-50	0.498323	0.357	0.082	7.78e-46	0	late_histone_H2B.L3-like
LOC121406016	1.62e-49	0.587139	0.357	0.084	2.88e-45	0	late_histone_H2A.L3-like
LOC121408814	2.42e-49	0.699615	0.943	0.754	4.29e-45	0	dynein_light_chain_LC6,_flagellar_outer_arm-like
LOC121417164	4.36e-49	0.43299	0.255	0.041	7.73e-45	0	myb-related_protein_B-like
LOC121430859	4.21e-48	0.598959	0.468	0.151	7.46e-44	0	replication_protein_A_32_kDa_subunit-B-like
LOC121416207	9.19e-48	0.940389	0.747	0.404	1.63e-43	0	tubulin_beta_chain-like
LOC121410988	2.45e-47	0.693466	0.702	0.327	4.33e-43	0	structural_maintenance_of_chromosomes_protein_1A-like
LOC121423856	3.03e-47	0.587884	0.466	0.148	5.37e-43	0	origin_recognition_complex_subunit_1-like
LOC121423267	1.82e-46	0.489385	0.996	0.98	3.23e-42	0	histone_H3.3A
LOC121418643	4.35e-46	0.543374	0.423	0.125	7.72e-42	0	protein_lin-52_homolog
LOC121410794	1.01e-45	0.603362	0.976	0.851	1.8e-41	0	chromobox_protein_homolog_1-like
LOC121428341	9.08e-45	0.659512	0.967	0.767	1.61e-40	0	protein_SET-like
LOC121427259	1.02e-44	0.753231	0.706	0.364	1.82e-40	0	inhibitor_of_growth_protein_4-like
LOC121408550	1.04e-43	0.662935	0.915	0.647	1.85e-39	0	GTP-binding_nuclear_protein_Ran-like
LOC121409292	1.65e-43	0.557253	0.373	0.106	2.93e-39	0	replication_factor_C_subunit_2-like
LOC121418263	6.31e-43	0.913674	0.747	0.421	1.12e-38	0	calmodulin
LOC121411518	1.72e-42	0.416885	0.272	0.057	3.04e-38	0	histone_acetyltransferase_type_B_catalytic_subunit-like
LOC121407732	1.79e-42	0.842258	0.423	0.144	3.17e-38	0	ubiquitin-conjugating_enzyme_E2_C-like
LOC121419376	2.64e-42	0.632728	0.516	0.204	4.68e-38	0	adenylosuccinate_synthetase_isozyme_1_A-like
LOC121414528	1.12e-41	0.774683	0.505	0.19	1.98e-37	0	tubulin_alpha-1_chain
LOC121424929	1.53e-41	0.381419	0.27	0.056	2.72e-37	0	DNA_replication_complex_GINS_protein_SLD5-like
LOC121409126	1.56e-41	0.715686	0.806	0.488	2.76e-37	0	small_nuclear_ribonucleoprotein_Sm_D3-like
LOC121432077	2.13e-41	0.493602	0.991	0.948	3.77e-37	0	heterogeneous_nuclear_ribonucleoprotein_D-like
LOC121412064	7.34e-41	0.434405	0.285	0.065	1.3e-36	0	E3_ubiquitin-protein_ligase_RAD18-like
LOC121423168	2.67e-40	0.310339	0.275	0.059	4.74e-36	0	late_histone_H2B.L3-like
LOC121411081	2.82e-40	0.633203	0.623	0.284	4.99e-36	0	nucleolin-like
LOC121413594	4.12e-39	0.61986	0.542	0.234	7.3e-35	0	histone-binding_protein_RBBP4
LOC121424678	4.3e-39	0.61514	0.88	0.587	7.62e-35	0	mitotic_apparatus_protein_p62-like
LOC121422910	8.29e-39	0.409467	0.303	0.077	1.47e-34	0	centromere_protein_X-like
LOC121420211	1.02e-38	1.02713	0.767	0.512	1.81e-34	0	uncharacterized_LOC121420211
LOC121421476	1.99e-38	0.56927	0.937	0.721	3.53e-34	0	magnetosome-associated_protein_MamJ-like
LOC121429543	2.31e-38	0.4177	0.292	0.071	4.1e-34	0	helicase-like_transcription_factor
LOC121414524	2.32e-38	0.565816	0.529	0.213	4.12e-34	0	tubulin_alpha-1_chain-like
LOC121422848	2.31e-37	0.40122	0.27	0.063	4.09e-33	0	ATPase_family_AAA_domain-containing_protein_5-like
LOC121418777	2.49e-37	0.605233	0.841	0.538	4.41e-33	0	small_nuclear_ribonucleoprotein_Sm_D2
LOC121428830	8.51e-37	0.611183	0.867	0.574	1.51e-32	0	ubiquitin_carboxyl-terminal_hydrolase_isozyme_L5-like
LOC121418289	3.56e-36	0.456295	0.336	0.099	6.32e-32	0	uncharacterized_LOC121418289
LOC121429904	5.56e-36	0.393196	0.316	0.088	9.85e-32	0	methylosome_subunit_pICln-like
LOC121420998	3.81e-35	0.680858	0.808	0.518	6.75e-31	0	nucleosome_assembly_protein_1-like_1
LOC121419366	2.95e-34	0.463709	0.46	0.178	5.23e-30	0	serine/threonine-protein_kinase_VRK1-like
LOC121423115	3.84e-34	0.396315	0.403	0.143	6.8e-30	0	uncharacterized_LOC121423115
LOC121411709	4.49e-34	0.667812	0.878	0.635	7.95e-30	0	uncharacterized_LOC121411709
LOC121412378	4.96e-34	0.366418	0.34	0.105	8.78e-30	0	cyclin-G2-like
LOC121429453	1.55e-31	0.541356	0.691	0.38	2.75e-27	0	H/ACA_ribonucleoprotein_complex_subunit_DKC1-like
LOC121427143	3.2e-31	0.404445	0.329	0.106	5.66e-27	0	chromatin_accessibility_complex_protein_1-like
LOC121430793	1.17e-30	0.52371	0.664	0.351	2.08e-26	0	KH_domain-containing,_RNA-binding,_signal_transduction-associated_protein_2-like
LOC121408280	1.38e-30	0.478926	0.383	0.144	2.44e-26	0	flap_endonuclease_1-like
LOC121427577	2.21e-29	0.493648	0.658	0.353	3.92e-25	0	nucleolin-like
LOC121410598	3.87e-29	0.427397	0.386	0.148	6.86e-25	0	uncharacterized_LOC121410598
LOC121429881	4.79e-29	0.51476	0.597	0.31	8.49e-25	0	DNA_polymerase_delta_subunit_3-like
LOC121420072	1.59e-28	0.470235	0.575	0.292	2.81e-24	0	N-alpha-acetyltransferase_50-like
LOC121430671	2.16e-28	0.349053	0.331	0.115	3.83e-24	0	exportin-2-like
LOC121410062	4.85e-28	0.402586	0.301	0.098	8.6e-24	0	telomeric_repeat-binding_factor_2-interacting_protein_1-like
LOC121408913	8.1e-28	-0.935512	0.741	0.784	1.44e-23	0	lysosomal_aspartic_protease-like
LOC121410361	8.18e-28	0.527771	0.658	0.37	1.45e-23	0	hepatoma-derived_growth_factor-related_protein_2-like
LOC121415393	8.43e-28	0.510819	0.59	0.303	1.49e-23	0	lamin-B1-like
LOC121430511	4.59e-27	0.352764	0.305	0.101	8.13e-23	0	regulator_of_chromosome_condensation-like
LOC121407989	5.87e-27	0.395882	0.294	0.097	1.04e-22	0	GMP_reductase_1-like
LOC121407016	7.89e-27	0.336745	0.277	0.086	1.4e-22	0	kinesin-like_protein_KIF15
LOC121427191	8.22e-27	0.501751	0.954	0.821	1.46e-22	0	nucleolin-like
LOC121424922	1.1e-26	0.41771	0.965	0.837	1.95e-22	0	small_nuclear_ribonucleoprotein_G-like
LOC121410735	2.08e-26	0.337729	0.375	0.145	3.69e-22	0	nuclear_transcription_factor_Y_subunit_B-1-like
LOC121422273	3.64e-26	0.388367	0.364	0.143	6.45e-22	0	uncharacterized_LOC121422273
LOC121416241	4.95e-26	0.482251	0.438	0.193	8.78e-22	0	uncharacterized_LOC121416241
LOC121429441	7.06e-26	0.371467	0.357	0.137	1.25e-21	0	DNA_replication_licensing_factor_mcm7-like
LOC121415221	1.16e-25	0.471824	0.769	0.491	2.05e-21	0	eukaryotic_translation_initiation_factor_3_subunit_J-like
LOC121418432	3.96e-25	0.449892	0.908	0.696	7.01e-21	0	glycine-rich_RNA-binding_protein_1-like
LOC121429185	7.42e-25	0.534421	0.939	0.786	1.31e-20	0	collagen_alpha-1(V)_chain-like
LOC121413283	3.07e-24	0.386173	0.394	0.168	5.45e-20	0	rRNA_2'-O-methyltransferase_fibrillarin-like
LOC121415061	8.87e-24	0.469538	0.871	0.681	1.57e-19	0	small_ubiquitin-related_modifier_3-like
LOC121411302	9.01e-24	0.312374	0.996	0.976	1.6e-19	0	ATP_synthase_F(0)_complex_subunit_C1,_mitochondrial-like
LOC121412946	1.6e-23	0.375559	0.418	0.185	2.83e-19	0	sister_chromatid_cohesion_protein_PDS5_homolog_A-B-like
LOC121423603	1.98e-23	-1.0595	0.085	0.304	3.51e-19	0	lateral_signaling_target_protein_2_homolog
LOC121410607	2.34e-23	0.464509	0.932	0.724	4.14e-19	0	high_mobility_group-T_protein-like
LOC121409138	2.38e-23	0.480584	0.763	0.506	4.22e-19	0	ran-specific_GTPase-activating_protein-like
LOC121415354	3.02e-23	0.350737	0.368	0.154	5.34e-19	0	WD40_repeat-containing_protein_SMU1-like
LOC121425187	5.21e-23	0.540168	0.523	0.274	9.24e-19	0	insulin-like_growth_factor-binding_protein_7
LOC121410374	6.48e-23	0.374337	0.516	0.25	1.15e-18	0	U6_snRNA-associated_Sm-like_protein_LSm7
LOC121419430	6.86e-23	0.302716	0.272	0.095	1.22e-18	0	uncharacterized_LOC121419430
LOC121428570	7.33e-23	0.469788	0.817	0.562	1.3e-18	0	spliceosome_RNA_helicase_Ddx39b
LOC121423686	1.05e-22	0.419071	0.673	0.396	1.86e-18	0	probable_rRNA-processing_protein_EBP2
LOC121426284	1.56e-22	-1.89142	0.368	0.533	2.76e-18	0	uncharacterized_LOC121426284
LOC121421867	1.97e-22	0.365214	0.251	0.084	3.5e-18	0	cell_division_control_protein_6_homolog
LOC121426211	2.08e-22	0.427711	0.525	0.276	3.68e-18	0	SWI/SNF-related_matrix-associated_actin-dependent_regulator_of_chromatin_subfamily_A_member_5-like
LOC121407324	2.17e-22	0.411022	0.529	0.28	3.85e-18	0	small_nuclear_ribonucleoprotein_Sm_D1-like
LOC121428518	2.25e-22	0.433354	0.917	0.735	3.98e-18	0	far_upstream_element-binding_protein_1-like
LOC121408762	2.42e-22	0.377275	0.673	0.38	4.29e-18	0	piwi-like_protein_1
LOC121408173	2.86e-22	-1.57312	0.416	0.58	5.06e-18	0	nucleoredoxin-like
LOC121431643	3.19e-22	0.382926	0.381	0.17	5.66e-18	0	glyoxylate_reductase/hydroxypyruvate_reductase-like
LOC121423170	3.25e-22	-0.865823	0.73	0.769	5.75e-18	0	CD63_antigen-like
LOC121420217	5.22e-22	0.419798	0.521	0.271	9.24e-18	0	ribosomal_RNA_processing_protein_1_homolog_A-like
LOC121419264	7.33e-22	0.421294	0.597	0.335	1.3e-17	0	uncharacterized_LOC121419264
LOC121423659	9.5e-22	0.413677	0.915	0.744	1.68e-17	0	peroxiredoxin-1-like
LOC121410093	1.34e-21	0.446392	0.8	0.568	2.38e-17	0	small_nuclear_ribonucleoprotein_F
LOC121424764	1.86e-21	0.422236	0.667	0.405	3.3e-17	0	nucleolar_protein_56-like
LOC121415660	1.93e-21	0.404852	0.845	0.602	3.43e-17	0	activated_RNA_polymerase_II_transcriptional_coactivator_p15-like
LOC121429986	3.88e-21	0.332187	0.366	0.161	6.87e-17	0	ribonuclease_H2_subunit_B-like
LOC121430881	1.03e-20	0.386332	0.514	0.267	1.82e-16	0	protein_DEK-like
LOC121430745	1.22e-20	-0.802514	0.501	0.609	2.16e-16	0	annexin_A13-like
LOC121425503	1.35e-20	0.382014	0.556	0.308	2.39e-16	0	transcription_factor_AP-4-like
LOC121425012	2.31e-20	0.337943	0.316	0.129	4.09e-16	0	histone-lysine_N-methyltransferase_NSD2-like
LOC121423466	2.35e-20	0.363836	0.51	0.269	4.16e-16	0	ran-binding_protein_3-like
LOC121423279	2.55e-20	0.31074	0.508	0.259	4.52e-16	0	luc7-like_protein_3
LOC121411335	2.91e-20	0.370025	0.495	0.261	5.16e-16	0	U6_snRNA-associated_Sm-like_protein_LSm3
LOC121423703	3.44e-20	0.442225	0.621	0.365	6.09e-16	0	transcription_factor_BTF3_homolog_4-like
LOC121415818	3.57e-20	0.375752	0.932	0.743	6.32e-16	0	ATP_synthase_subunit_alpha,_mitochondrial-like
LOC121410178	5.39e-20	0.453119	0.908	0.714	9.54e-16	0	heterogeneous_nuclear_ribonucleoprotein_A3-like
LOC121427475	6.97e-20	0.404906	0.935	0.759	1.24e-15	0	chromodomain-helicase-DNA-binding_protein_Mi-2_homolog
LOC121406120	7.55e-20	0.268889	0.264	0.098	1.34e-15	0	solute_carrier_family_28_member_3-like
LOC121422800	8.28e-20	0.27726	0.998	0.979	1.47e-15	0	40S_ribosomal_protein_S9
LOC121418514	1.05e-19	-1.12783	0.928	0.951	1.86e-15	0	uncharacterized_LOC121418514
LOC121407001	1.68e-19	0.409254	0.739	0.464	2.97e-15	0	uncharacterized_LOC121407001
LOC121418185	1.81e-19	0.382902	0.915	0.711	3.2e-15	0	cell_surface_glycoprotein_1-like
LOC121426368	2.39e-19	0.357963	0.505	0.264	4.24e-15	0	cubilin-like
LOC121411835	2.84e-19	0.321454	0.392	0.183	5.03e-15	0	putative_ABC_transporter_arginine-binding_protein_2
LOC121422796	2.99e-19	0.395717	0.584	0.333	5.3e-15	0	serrate_RNA_effector_molecule_homolog
LOC121408361	3.57e-19	0.262545	0.349	0.149	6.32e-15	0	jouberin-like
LOC121422555	4.93e-19	0.270587	0.268	0.103	8.74e-15	0	polycomb_protein_suz12-B-like
LOC121419032	8.38e-19	-0.480179	0.989	0.984	1.49e-14	0	cofilin-like
LOC121408797	1.11e-18	0.475455	0.863	0.644	1.97e-14	0	eukaryotic_translation_initiation_factor_3_subunit_C-like
LOC121410748	1.51e-18	0.282013	0.275	0.106	2.67e-14	0	uncharacterized_LOC121410748
gene-DR311-mgr02	1.88e-18	-0.362301	1	1	3.33e-14	0
LOC121426250	2.09e-18	0.403428	0.867	0.624	3.7e-14	0	zinc_metalloproteinase_nas-39-like
LOC121410157	2.54e-18	0.349225	0.736	0.475	4.51e-14	0	uncharacterized_LOC121410157
LOC121419299	2.84e-18	0.329498	0.434	0.217	5.04e-14	0	RNA-binding_protein_Rsf1-like
LOC121431716	3.15e-18	0.264492	0.989	0.959	5.57e-14	0	peptidyl-prolyl_cis-trans_isomerase
LOC121428750	3.52e-18	0.365622	0.651	0.406	6.23e-14	0	nucleolar_protein_58-like
LOC121419040	3.64e-18	0.381063	0.309	0.137	6.44e-14	0	ribonuclease_H2_subunit_C-like
LOC121418682	4.06e-18	-1.06484	0.32	0.48	7.19e-14	0	monocarboxylate_transporter_13-like
LOC121431621	4.46e-18	0.327893	0.954	0.762	7.91e-14	0	SPARC-like
LOC121427642	7.69e-18	0.27685	0.316	0.136	1.36e-13	0	uncharacterized_LOC121427642
LOC121429260	1.24e-17	0.308155	0.51	0.284	2.19e-13	0	peptidyl-prolyl_cis-trans_isomerase-like_3
LOC121428559	1.31e-17	0.368421	0.603	0.375	2.32e-13	0	cell_division_cycle_and_apoptosis_regulator_protein_1-like
LOC121424869	1.39e-17	0.329626	0.717	0.473	2.46e-13	0	serine/threonine-protein_phosphatase_2A_55_kDa_regulatory_subunit_B_beta_isoform-like
LOC121421009	1.4e-17	0.319422	0.364	0.172	2.48e-13	0	ruvB-like_2
LOC121425114	1.44e-17	0.297841	0.46	0.24	2.54e-13	0	uncharacterized_LOC121425114
LOC121424047	1.55e-17	0.343222	0.952	0.826	2.75e-13	0	ATP_synthase_subunit_delta,_mitochondrial-like
LOC121422827	1.81e-17	0.337598	0.322	0.146	3.21e-13	0	ubiquitin-conjugating_enzyme_E2_S-like
LOC121424658	1.9e-17	0.32176	0.294	0.125	3.36e-13	0	structural_maintenance_of_chromosomes_protein_3-like
LOC121408911	2.17e-17	-0.834451	0.298	0.46	3.84e-13	0	major_vault_protein
LOC121430732	2.68e-17	0.335387	0.638	0.393	4.75e-13	0	probable_protein_phosphatase_2C_21
LOC121419440	2.71e-17	0.447198	0.63	0.408	4.8e-13	0	bromodomain_adjacent_to_zinc_finger_domain_protein_1A-like
LOC121409032	2.98e-17	0.255869	0.259	0.103	5.27e-13	0	DNA_repair_and_recombination_protein_RAD54B-like
LOC121418868	1.07e-16	0.305573	0.355	0.17	1.9e-12	0	putative_2'-deoxynucleoside_5'-phosphate_N-hydrolase_1
LOC121422889	1.08e-16	0.264778	0.983	0.939	1.91e-12	0	ATP_synthase_subunit_f,_mitochondrial-like
LOC121411615	1.38e-16	0.372954	0.532	0.303	2.45e-12	0	SWI/SNF-related_matrix-associated_actin-dependent_regulator_of_chromatin_subfamily_E_member_1-like
LOC121408974	1.48e-16	0.280761	0.344	0.163	2.62e-12	0	protein_phosphatase_1E-like
LOC121418217	1.77e-16	0.333244	0.501	0.277	3.14e-12	0	enhancer_of_rudimentary_homolog
LOC121413980	2.18e-16	0.332521	0.736	0.479	3.85e-12	0	heterogeneous_nuclear_ribonucleoprotein_R-like
gene-DR311-mgr01	2.44e-16	-0.374014	1	1	4.32e-12	0
LOC121424051	2.69e-16	0.396836	0.682	0.457	4.76e-12	0	plasminogen_activator_inhibitor_1_RNA-binding_protein-like
LOC121411745	4.27e-16	0.403726	0.887	0.679	7.56e-12	0	methionine_aminopeptidase_2-like
LOC121410764	6.68e-16	0.306687	0.566	0.336	1.18e-11	0	CTD_small_phosphatase-like_protein_2
LOC121409007	6.87e-16	0.25435	0.407	0.207	1.22e-11	0	DNA-directed_RNA_polymerase_II_subunit_RPB11-a
LOC121431565	9.79e-16	0.336016	0.436	0.233	1.73e-11	0	nucleolar_protein_dao-5-like
LOC121411809	1.08e-15	0.35227	0.595	0.358	1.92e-11	0	protein_FAM50A-like
LOC121428802	1.28e-15	0.356081	0.893	0.724	2.26e-11	0	bromodomain-containing_protein_3-like
LOC121428566	1.69e-15	0.325915	0.466	0.26	2.99e-11	0	uridine-cytidine_kinase_2-like
LOC121410179	2.72e-15	0.3526	0.9	0.736	4.82e-11	0	nascent_polypeptide-associated_complex_subunit_alpha-like
LOC121430919	3.31e-15	0.295739	0.344	0.17	5.87e-11	0	ATPase_family_AAA_domain-containing_protein_2-like
LOC121421499	3.32e-15	0.290824	0.654	0.403	5.89e-11	0	U6_snRNA-associated_Sm-like_protein_LSm5
LOC121419282	3.5e-15	0.327183	0.303	0.142	6.2e-11	0	DNA_replication_licensing_factor_mcm5-like
LOC121412420	3.67e-15	0.294913	0.418	0.221	6.5e-11	0	putative_oxidoreductase_GLYR1
LOC121409284	3.92e-15	-1.29022	0.105	0.262	6.95e-11	0	myb-like_protein_X
LOC121416136	4.96e-15	0.320402	0.566	0.344	8.79e-11	0	RNA-binding_protein_MEX3B-like
LOC121410681	5.81e-15	0.30779	0.638	0.399	1.03e-10	0	uncharacterized_LOC121410681
LOC121418581	6.07e-15	0.255383	0.458	0.251	1.08e-10	0	metastasis-associated_protein_MTA3-like
LOC121423851	6.22e-15	-1.13607	0.697	0.739	1.1e-10	0	uncharacterized_LOC121423851
LOC121423226	7.65e-15	0.382125	0.621	0.391	1.36e-10	0	THO_complex_subunit_4-like
LOC121415573	8.57e-15	0.33118	0.887	0.691	1.52e-10	0	proteasome_subunit_alpha_type-4-like
LOC121429713	9.61e-15	0.402994	0.678	0.45	1.7e-10	0	collagen_alpha-1(I)_chain-like
LOC121426742	9.62e-15	0.369393	0.61	0.394	1.7e-10	0	co-chaperone_protein_p23-1-like
LOC121420574	1.1e-14	0.311791	0.843	0.64	1.95e-10	0	polyadenylate-binding_protein_4-like
LOC121426330	1.18e-14	0.288902	0.963	0.856	2.09e-10	0	ATP_synthase_subunit_beta,_mitochondrial
LOC121409320	1.18e-14	0.374303	0.893	0.752	2.09e-10	0	high_mobility_group_protein_1_homolog
LOC121418299	1.3e-14	0.30156	0.619	0.392	2.29e-10	0	N-alpha-acetyltransferase_20-like
LOC121430846	1.39e-14	0.302942	0.946	0.83	2.47e-10	0	cytochrome_c_oxidase_subunit_5B,_mitochondrial-like
LOC121407892	1.52e-14	0.356806	0.889	0.703	2.7e-10	0	peptidyl-prolyl_cis-trans_isomerase_6-like
LOC121428666	1.64e-14	0.286632	0.383	0.206	2.91e-10	0	peptidyl-prolyl_cis-trans_isomerase_NIMA-interacting_1-like
LOC121420106	1.66e-14	0.261097	0.51	0.292	2.94e-10	0	heterogeneous_nuclear_ribonucleoprotein_K-like
LOC121405842	1.78e-14	0.313656	0.571	0.357	3.16e-10	0	small_nuclear_ribonucleoprotein_E-like
LOC121411560	1.89e-14	0.288322	0.529	0.312	3.35e-10	0	serine/arginine-rich_splicing_factor_7-like
LOC121407258	2.22e-14	-0.903121	0.512	0.599	3.94e-10	0	development-specific_protein_LVN1.2-like
LOC121410453	2.41e-14	0.332548	0.586	0.368	4.28e-10	0	guanine_nucleotide-binding_protein-like_NSN1
LOC121419298	3e-14	0.291081	0.675	0.442	5.32e-10	0	ergosterol_biosynthetic_protein_28-like
LOC121418955	3.61e-14	0.27032	0.969	0.893	6.4e-10	0	uncharacterized_LOC121418955
LOC121413788	3.86e-14	0.28637	0.264	0.121	6.84e-10	0	c-Myc-binding_protein-like
LOC121411145	4.5e-14	0.284693	0.549	0.336	7.98e-10	0	H/ACA_ribonucleoprotein_complex_subunit_GAR1-like
LOC121429384	4.6e-14	0.311645	0.377	0.2	8.16e-10	0	importin-5-like
LOC121409216	5.13e-14	0.35499	0.81	0.601	9.09e-10	0	aminoacyl_tRNA_synthase_complex-interacting_multifunctional_protein_1-like
LOC121411673	5.28e-14	0.293364	0.943	0.81	9.36e-10	0	translocon-associated_protein_subunit_delta-like
LOC121427426	6.88e-14	0.278046	0.843	0.648	1.22e-09	0	prohibitin-2-like
LOC121424542	7.28e-14	0.396766	0.355	0.188	1.29e-09	0	E3_ubiquitin-protein_ligase_UHRF1-like
LOC121406953	7.45e-14	-0.644789	0.871	0.886	1.32e-09	0
LOC121410974	8.29e-14	0.294179	0.51	0.291	1.47e-09	0	uncharacterized_LOC121410974
LOC121419353	8.67e-14	0.317987	0.458	0.26	1.54e-09	0	uncharacterized_LOC121419353
LOC121407099	1.18e-13	0.384447	0.675	0.459	2.09e-09	0	RE1-silencing_transcription_factor-like
LOC121421876	1.28e-13	0.289251	0.728	0.529	2.26e-09	0	pre-mRNA-splicing_factor_CWC22_homolog
LOC121407733	1.32e-13	0.285395	0.477	0.272	2.34e-09	0	mRNA_cap_guanine-N7_methyltransferase-like
LOC121414246	1.47e-13	-0.665781	0.782	0.77	2.6e-09	0	V-type_proton_ATPase_16_kDa_proteolipid_subunit-like
LOC121410256	1.48e-13	-0.915318	0.198	0.36	2.61e-09	0	rho-related_protein_racA-like
LOC121407472	1.69e-13	0.268224	0.649	0.408	3e-09	0	polyadenylate-binding_protein_2-like
LOC121427391	1.87e-13	-0.470342	0.908	0.907	3.32e-09	0	gamma-aminobutyric_acid_receptor-associated_protein
LOC121427447	1.89e-13	0.26991	0.298	0.147	3.35e-09	0	triosephosphate_isomerase-like
LOC121427013	2.42e-13	0.257434	0.519	0.304	4.29e-09	0	splicing_factor_3B_subunit_6-like
LOC121418700	3.26e-13	0.288708	0.937	0.79	5.77e-09	0	elongation_factor_1-gamma-like
LOC121408568	3.29e-13	0.256422	0.383	0.206	5.83e-09	0	FACT_complex_subunit_SSRP1-like
LOC121414331	3.44e-13	0.266094	0.501	0.298	6.1e-09	0	peroxiredoxin-4-like
LOC121428158	3.59e-13	0.288346	0.865	0.694	6.37e-09	0	cytochrome_b-c1_complex_subunit_7-like
LOC121412067	3.74e-13	0.280707	0.556	0.334	6.63e-09	0	SWI/SNF_complex_subunit_SMARCC2-like
LOC121423953	4.14e-13	0.277266	0.547	0.344	7.34e-09	0	NADH_dehydrogenase_[ubiquinone]_1_alpha_subcomplex_subunit_7-like
LOC121407456	5.11e-13	0.346074	0.867	0.674	9.05e-09	0	cytochrome_b-c1_complex_subunit_Rieske,_mitochondrial-like
LOC121410605	5.91e-13	-0.905651	0.427	0.529	1.05e-08	0	ras_association_domain-containing_protein_5-like
LOC121410556	6.24e-13	-0.780774	0.993	0.991	1.11e-08	0	procathepsin_L-like
LOC121425645	7.4e-13	0.292492	0.708	0.491	1.31e-08	0	lupus_La_protein_homolog
LOC121407519	7.5e-13	0.470685	0.431	0.26	1.33e-08	0	forkhead_box_protein_C2-B-like
LOC121422339	7.79e-13	0.258929	0.508	0.297	1.38e-08	0	39S_ribosomal_protein_L12,_mitochondrial-like
LOC121412862	8.98e-13	0.328643	0.754	0.544	1.59e-08	0	transcriptional_regulator_ATRX_homolog
LOC121407404	1.11e-12	0.266403	0.808	0.589	1.96e-08	0	proteasome_subunit_alpha_type-7
LOC121418778	1.15e-12	0.279478	0.643	0.419	2.03e-08	0	serine/arginine-rich_splicing_factor_6-like
LOC121420316	1.34e-12	0.261662	0.78	0.536	2.37e-08	0	serine/threonine-protein_phosphatase_2A_65_kDa_regulatory_subunit_A_alpha_isoform-like
LOC121410870	1.34e-12	-1.70018	0.854	0.805	2.38e-08	0	procathepsin_L-like
LOC121408889	1.34e-12	0.290438	0.675	0.45	2.38e-08	0	serine/arginine-rich_splicing_factor_1-like
LOC121428312	1.67e-12	-0.50991	1	0.988	2.95e-08	0	actin,_cytoskeletal_1A
LOC121411632	1.77e-12	0.256044	0.427	0.235	3.14e-08	0	CXXC-type_zinc_finger_protein_1-like
LOC121415848	2.11e-12	-0.65021	0.571	0.625	3.74e-08	0	adenylyl_cyclase-associated_protein_1-like
LOC121421101	2.48e-12	0.253884	0.516	0.314	4.39e-08	0	protein_arginine_N-methyltransferase_1-like
LOC121427284	2.57e-12	0.312286	0.752	0.542	4.56e-08	0	heterogeneous_nuclear_ribonucleoprotein_K_homolog
LOC121423694	3.68e-12	0.284939	0.623	0.417	6.52e-08	0	transcription_factor_BTF3_homolog_4-like
LOC121420144	4.09e-12	0.283821	0.586	0.365	7.24e-08	0	uncharacterized_LOC121420144
LOC121414112	4.46e-12	0.312252	0.501	0.315	7.89e-08	0	trichohyalin-like
LOC121431611	5.57e-12	-0.955229	0.272	0.388	9.87e-08	0	gelsolin-like_protein_2
LOC121419289	6.09e-12	0.265576	0.288	0.144	1.08e-07	0	uncharacterized_LOC121419289
LOC121411391	6.44e-12	0.282498	0.542	0.34	1.14e-07	0	epoxide_hydrolase_3-like
LOC121407089	6.68e-12	-0.731522	0.181	0.316	1.18e-07	0	cysteine_and_histidine-rich_protein_1-like
LOC121410023	6.83e-12	0.274494	0.593	0.385	1.21e-07	0	28S_ribosomal_protein_S33,_mitochondrial-like
LOC121407906	7.33e-12	0.287699	0.773	0.535	1.3e-07	0	adenosylhomocysteinase_A-like
LOC121407784	1.22e-11	0.258742	0.394	0.225	2.16e-07	0	heterogeneous_nuclear_ribonucleoprotein_C-like_1
LOC121429577	1.26e-11	0.281975	0.566	0.359	2.23e-07	0	succinate--CoA_ligase_[ADP-forming]_subunit_beta,_mitochondrial-like
LOC121406174	1.31e-11	0.636168	0.475	0.307	2.32e-07	0	aqualysin-1-like
LOC121427466	1.38e-11	0.283412	0.928	0.796	2.45e-07	0	glyceraldehyde-3-phosphate_dehydrogenase-like
LOC121410676	1.66e-11	0.294961	0.654	0.45	2.94e-07	0	RNA_polymerase-associated_protein_LEO1-like
LOC121407176	1.73e-11	-0.812666	0.429	0.524	3.07e-07	0	development-specific_protein_LVN1.2-like
LOC121415524	2e-11	0.276282	0.314	0.167	3.54e-07	0	28S_ribosomal_protein_S16,_mitochondrial-like
LOC121415334	2.09e-11	0.295696	0.843	0.674	3.7e-07	0	uncharacterized_LOC121415334
LOC121419325	2.43e-11	0.256657	0.303	0.159	4.31e-07	0	homeobox_protein_MSX-2-like
LOC121422462	3.5e-11	0.302411	0.834	0.642	6.2e-07	0	prohibitin-like
LOC121408139	3.79e-11	0.314855	0.871	0.688	6.71e-07	0	proteasome_subunit_beta_type-5-like
LOC121430637	3.97e-11	0.303028	0.558	0.359	7.03e-07	0	transcription_factor_SOX-4-like
LOC121407357	4.43e-11	0.266801	0.357	0.2	7.84e-07	0	ATP-dependent_RNA_helicase_DDX1-like
LOC121428545	4.6e-11	0.296957	0.399	0.233	8.15e-07	0	ficolin-3-like
LOC121428219	4.85e-11	-0.488577	0.889	0.863	8.59e-07	0	vesicle-associated_membrane_protein_3-like
LOC121407987	4.89e-11	0.262124	0.477	0.289	8.66e-07	0	bromodomain-containing_protein_7-like
LOC121414295	5.14e-11	0.276403	0.802	0.591	9.11e-07	0	NADH_dehydrogenase_[ubiquinone]_1_beta_subcomplex_subunit_4-like
LOC121431895	6.33e-11	0.319243	0.257	0.128	1.12e-06	0	pituitary_homeobox_x-like
LOC121406022	6.35e-11	0.281518	0.632	0.429	1.13e-06	0	interferon_alpha-inducible_protein_27-like_protein_2A
LOC121411409	8.58e-11	-0.565018	0.495	0.582	1.52e-06	0	charged_multivesicular_body_protein_5-like
LOC121426805	1.08e-10	0.326127	0.553	0.367	1.92e-06	0	MICOS_complex_subunit_MIC27-like
LOC121427378	2.12e-10	0.325167	0.725	0.528	3.76e-06	0	NADH_dehydrogenase_[ubiquinone]_1_beta_subcomplex_subunit_5,_mitochondrial-like
LOC121410780	2.17e-10	0.259966	0.627	0.43	3.84e-06	0	MKI67_FHA_domain-interacting_nucleolar_phosphoprotein-like
LOC121428669	2.47e-10	0.262885	0.712	0.501	4.38e-06	0	endothelial_differentiation-related_factor_1-like
LOC121423558	2.63e-10	-0.988609	0.207	0.33	4.67e-06	0	uncharacterized_LOC121423558
LOC121408338	4.86e-10	0.253887	0.512	0.326	8.62e-06	0	uncharacterized_LOC121408338
LOC121422424	4.97e-10	0.299745	0.651	0.453	8.8e-06	0	RNA-binding_protein_with_serine-rich_domain_1-like
LOC121423036	6.47e-10	0.26215	0.669	0.474	1.15e-05	0	serine/arginine-rich_splicing_factor_2-like
LOC121411662	7.46e-10	0.257383	0.913	0.767	1.32e-05	0	phosphate_carrier_protein,_mitochondrial-like
LOC121410020	9.32e-10	-0.834431	0.512	0.564	1.65e-05	0	S-adenosylmethionine_sensor_upstream_of_mTORC1-like
LOC121408275	1.68e-09	0.252806	0.723	0.536	2.98e-05	0	NADH_dehydrogenase_[ubiquinone]_iron-sulfur_protein_6,_mitochondrial-like
LOC121410491	2.06e-09	-0.699615	0.887	0.866	3.65e-05	0	gamma-interferon-inducible_lysosomal_thiol_reductase-like
LOC121432057	2.53e-09	-0.879353	0.142	0.255	4.48e-05	0	monocarboxylate_transporter_13-like
LOC121428167	3.54e-09	0.281004	0.83	0.687	6.28e-05	0	squalene_synthase-like
LOC121405859	4.47e-09	-0.668662	0.619	0.655	7.92e-05	0	uncharacterized_LOC121405859
LOC121411271	6.02e-09	0.261865	0.499	0.337	0.000106678	0	isocitrate_dehydrogenase_[NADP],_mitochondrial-like
LOC121411576	9.84e-09	-0.737005	0.442	0.505	0.000174318	0	protein_DD3-3-like
LOC121408817	1.18e-08	0.27072	0.434	0.27	0.000208372	0	macrophage_migration_inhibitory_factor-like
LOC121429222	1.4e-08	-1.65034	0.39	0.454	0.000247704	0	uncharacterized_LOC121429222
LOC121411556	1.86e-08	-0.754173	0.617	0.652	0.00032891	0	thyrotroph_embryonic_factor-like
LOC121411505	2.02e-08	-0.467044	0.667	0.649	0.000357228	0	ras-related_protein_Rab-8A-like
LOC121408912	2.44e-08	-0.688971	0.521	0.569	0.000432248	0	unconventional_myosin-XIX-like
LOC121414311	2.97e-08	0.260166	0.29	0.17	0.000526648	0	protein_MIX23-like
LOC121431956	3.94e-08	-0.720057	0.793	0.767	0.000697863	0	uncharacterized_LOC121431956
LOC121411587	4.82e-08	-1.22044	0.303	0.382	0.000854617	0	filamin-A-like
LOC121423682	5.83e-08	0.250905	0.773	0.619	0.00103275	0	sodium-_and_chloride-dependent_glycine_transporter_1-like
LOC121420405	8.89e-08	0.271847	0.852	0.745	0.0015749	0	ATP-dependent_RNA_helicase_cgh-1-like
LOC121431423	1.37e-07	-0.667892	0.492	0.528	0.00242995	0	syntenin-1-like
LOC121408340	1.52e-07	-0.518559	0.754	0.79	0.00269752	0	CCAAT/enhancer-binding_protein_alpha-like
LOC121423966	2.91e-07	-0.569373	0.564	0.592	0.00515968	0	phospholipase_A2-like
LOC121431604	3.17e-07	-1.03397	0.314	0.38	0.00561579	0	steroid_17-alpha-hydroxylase/17,20_lyase-like
LOC121410754	3.97e-07	-0.520979	0.153	0.25	0.0070261	0	diacylglycerol_kinase_beta-like
LOC121416938	4.23e-07	0.28419	0.749	0.662	0.00749413	0	60S_ribosomal_protein_L12-like
LOC121425063	6.3e-07	0.262836	0.743	0.567	0.0111695	0	26S_proteasome_non-ATPase_regulatory_subunit_4-like
LOC121405977	9.31e-07	-0.582401	0.946	0.923	0.0165021	0
LOC121418929	1.39e-06	-0.643175	0.185	0.28	0.0246874	0	circularly_permutated_Ras_protein_1-like
LOC121429984	1.5e-06	-0.52413	0.806	0.764	0.0265345	0	lysosome-associated_membrane_glycoprotein_1-like
LOC121431963	1.64e-06	-0.503853	0.172	0.264	0.0291409	0	PDZ_and_LIM_domain_protein_5-like
LOC121422598	2.34e-06	-0.44146	0.558	0.575	0.0414253	0	ras-related_protein_Rac1
LOC121410067	2.49e-06	-0.516476	0.586	0.597	0.0441382	0	ectopic_P_granules_protein_5_homolog
LOC121425475	6.32e-06	-0.60895	0.298	0.369	0.111961	0	CREB3_regulatory_factor-like
LOC121423991	7.66e-06	-0.607993	0.412	0.45	0.135709	0	next_to_BRCA1_gene_1_protein-like
LOC121415455	7.97e-06	-0.590571	0.383	0.43	0.141281	0	tetraspanin-36-like
LOC121420063	8.53e-06	-0.880693	0.301	0.373	0.15122	0	AAC-rich_mRNA_clone_AAC4_protein-like
LOC121427339	1.15e-05	-0.598236	0.397	0.434	0.203853	0	EF-hand_domain-containing_protein_D2_homolog
LOC121423799	1.19e-05	-0.523211	0.763	0.773	0.210089	0	MAP_kinase-interacting_serine/threonine-protein_kinase_1-like
LOC121426187	1.31e-05	-0.587385	0.373	0.458	0.232001	0	uncharacterized_LOC121426187
LOC121417783	1.55e-05	-0.589187	0.187	0.263	0.274691	0	nucleolar_and_coiled-body_phosphoprotein_1-like
LOC121418918	2.26e-05	-0.363627	0.706	0.705	0.400924	0	ras-related_protein_ORAB-1
LOC121424951	2.66e-05	-0.79494	0.325	0.386	0.471124	0	uncharacterized_LOC121424951
LOC121423241	3.88e-05	-0.478897	0.275	0.336	0.688043	0	cell_death-inducing_p53-target_protein_1_homolog
LOC121422319	4.7e-05	-0.475413	0.643	0.615	0.833542	0	probable_serine_incorporator
LOC121415190	5.53e-05	-0.494964	0.523	0.544	0.979588	0	bcl-2-like_protein_2
LOC121410922	5.58e-05	-0.44518	0.373	0.422	0.988572	0	ubiquitin-conjugating_enzyme_E2_H-like
LOC121428377	5.86e-05	-0.364486	0.571	0.567	1	0	actin-related_protein_2/3_complex_subunit_5-A-like
LOC121431605	6.62e-05	-0.510133	0.684	0.634	1	0	gelsolin-like_protein_1
LOC121428321	7.2e-05	-0.512945	0.41	0.442	1	0	ATP-binding_cassette_sub-family_C_member_4-like
LOC121417052	7.34e-05	-0.971458	0.564	0.57	1	0	uncharacterized_LOC121417052
LOC121410036	7.55e-05	-0.445347	0.222	0.293	1	0	proline-serine-threonine_phosphatase-interacting_protein_1-like
LOC121426050	7.87e-05	-0.620378	0.229	0.289	1	0	serine/threonine-protein_kinase_17A-like
LOC121405615	7.95e-05	-1.13447	0.296	0.348	1	0	U6_spliceosomal_RNA
LOC121425834	8.89e-05	-0.356907	0.377	0.256	1	0	muscle_M-line_assembly_protein_unc-89-like
LOC121410044	9.02e-05	-0.501721	0.379	0.42	1	0	progranulin-like
LOC121432004	0.000107587	-1.76124	0.216	0.284	1	0	interferon_alpha-inducible_protein_27,_mitochondrial-like
LOC121426180	0.000133	-0.546196	0.464	0.472	1	0	1-phosphatidylinositol_4,5-bisphosphate_phosphodiesterase_delta-4-like
LOC121418911	0.000134137	-0.371426	0.551	0.561	1	0	EH_domain-containing_protein_1-like
LOC121422505	0.000143803	-1.35953	0.244	0.292	1	0	uncharacterized_LOC121422505
LOC121420380	0.000146043	-0.594947	0.702	0.659	1	0	protein_BTG3-like
LOC121423315	0.000147285	-0.435933	0.316	0.359	1	0	methionine-R-sulfoxide_reductase_B1-like
LOC121419389	0.000170875	-0.490464	0.617	0.609	1	0	mRNA_decay_activator_protein_ZFP36L2-A-like
LOC121416923	0.000179483	-0.367592	0.704	0.65	1	0	profilin-like
LOC121427769	0.00019583	-1.22393	0.614	0.596	1	0	ATP-dependent_translocase_ABCB1-like
LOC121410964	0.000199788	-0.393816	0.684	0.652	1	0	ADP-ribosylation_factor-like_protein_8B-A
LOC121423636	0.000281508	-0.332503	0.932	0.895	1	0	calreticulin-like
LOC121422269	0.000318031	-0.283898	0.824	0.758	1	0	protein_disulfide-isomerase-like
LOC121423580	0.000424232	-0.53696	0.484	0.489	1	0	NPC_intracellular_cholesterol_transporter_1-like
LOC121423320	0.000447293	-0.419096	0.697	0.658	1	0	rho_GDP-dissociation_inhibitor_1-like
LOC121410373	0.000453188	-0.658012	0.562	0.545	1	0	CDC42_small_effector_protein_2-like
LOC121429030	0.000455172	-0.422136	0.826	0.807	1	0	immediate_early_response_gene_5-like_protein
LOC121408448	0.000458589	-0.360226	0.229	0.285	1	0	DNA_polymerase_delta_subunit_4-like
LOC121408055	0.000465826	-0.41572	0.667	0.674	1	0	core-binding_factor_subunit_beta-like
LOC121417135	0.000644051	-0.472281	0.641	0.603	1	0	proline-rich_transmembrane_protein_1-like
LOC121408658	0.000691333	-0.381177	0.296	0.343	1	0	ubiquitin_carboxyl-terminal_hydrolase_32-like
LOC121410368	0.00079162	-0.336449	0.623	0.592	1	0	talin-1-like
LOC121415962	0.000800019	-0.484843	0.484	0.478	1	0	endophilin-A3-like
LOC121419347	0.000842502	-0.403779	0.519	0.501	1	0	V-type_proton_ATPase_subunit_D-like
LOC121415652	0.000860651	-0.468435	0.37	0.397	1	0	microtubule-associated_protein_1B-like
LOC121426068	0.000989179	-0.46782	0.333	0.361	1	0	ATP-dependent_translocase_ABCB1-like
LOC121418340	0.00102039	-0.291211	0.874	0.813	1	0	NPC_intracellular_cholesterol_transporter_2_homolog_a-like
LOC121412249	0.00104798	-0.423837	0.296	0.336	1	0	acid_ceramidase-like
LOC121413919	0.0011102	-0.567732	0.333	0.363	1	0	protein_held_out_wings-like
LOC121419232	0.00120326	-0.504846	0.464	0.464	1	0	spastin-like
LOC121429599	0.00121944	-0.511829	0.599	0.583	1	0	mid1-interacting_protein_1A-like
LOC121430536	0.00139745	-0.250775	0.845	0.789	1	0	myosin_regulatory_light_chain_2,_smooth_muscle_minor_isoform-like
LOC121431114	0.00157799	-0.43407	0.386	0.419	1	0	elongation_factor_1-alpha_2-like
LOC121411243	0.00160978	-0.346285	0.264	0.312	1	0	programmed_cell_death_6-interacting_protein-like
LOC121426396	0.00164508	-0.398665	0.214	0.26	1	0	integrin_beta-1-B-like
LOC121410221	0.00168987	-0.378827	0.359	0.385	1	0	V-type_proton_ATPase_subunit_S1-like
LOC121418919	0.00231629	-0.49849	0.283	0.315	1	0	protein_enabled_homolog
LOC121409142	0.00263679	-0.370472	0.222	0.267	1	0	beta-adrenergic_receptor_kinase_2-like
LOC121421387	0.00273858	-0.701527	0.233	0.271	1	0	SAM_pointed_domain-containing_Ets_transcription_factor-like
LOC121409331	0.00288062	-0.327031	0.222	0.27	1	0	synergin_gamma-like
LOC121409049	0.00298052	-0.367979	0.477	0.473	1	0	coronin-6-like
LOC121418701	0.00335868	-1.04212	0.229	0.265	1	0	neuroblast_differentiation-associated_protein_AHNAK-like
LOC121409294	0.00359689	-0.398353	0.261	0.295	1	0	protein_spinster_homolog_1-like
LOC121423143	0.00422614	-0.39402	0.612	0.589	1	0	fascin-like
LOC121424483	0.00426404	-0.289668	0.477	0.471	1	0	AP-3_complex_subunit_delta-1-like
LOC121427950	0.0043499	-0.262646	0.793	0.623	1	0	uncharacterized_LOC121427950
LOC121422290	0.00443918	-0.352782	0.216	0.261	1	0	rho_GTPase-activating_protein_17-like
LOC121428707	0.00508294	-0.463764	0.397	0.394	1	0	V-type_proton_ATPase_subunit_G-like
LOC121417380	0.00526483	-0.404454	0.218	0.255	1	0	plastin-3-like
LOC121415161	0.007247	-0.306039	0.793	0.748	1	0	receptor_expression-enhancing_protein_5-like
LOC121427392	0.00807932	-0.332341	0.316	0.342	1	0	tumor_protein_D52-like
LOC121409191	0.00848042	-0.259951	0.749	0.691	1	0	flotillin-2a-like
LOC121415925	0.00993046	-0.386745	0.329	0.354	1	0	uncharacterized_LOC121415925
LOC121424659	0.0101449	-0.367693	0.296	0.321	1	0	WD_repeat-containing_protein_1-B-like
LOC121407044	0.0103062	-0.36846	0.436	0.439	1	0	IST1_homolog
LOC121418567	0.0117655	-0.483105	0.407	0.415	1	0	uncharacterized_LOC121418567
LOC121409225	0.0123623	-0.342867	0.414	0.415	1	0	syntaxin-like
LOC121431681	0.0128337	-0.336368	0.484	0.475	1	0	TNFAIP3-interacting_protein_1-like
LOC121410381	0.013569	-0.38932	0.292	0.312	1	0	LIM_and_SH3_domain_protein_1-like
LOC121418945	0.0135743	-0.475082	0.329	0.344	1	0	microtubule-associated_proteins_1A/1B_light_chain_3C-like
LOC121423749	0.0136257	-0.25265	0.233	0.268	1	0	muscle-specific_protein_20-like
LOC121422412	0.0140135	-0.328636	0.414	0.416	1	0	WASH_complex_subunit_2-like
LOC121431731	0.0141054	-0.371118	0.29	0.313	1	0	stearoyl-CoA_desaturase_5-like
LOC121430638	0.0141104	-0.616274	0.233	0.267	1	0	monocarboxylate_transporter_2-like
LOC121410498	0.0141541	-0.345595	0.237	0.27	1	0	transcription_factor_E3-like
LOC121432076	0.0147035	-0.295082	0.224	0.257	1	0	glutamate_dehydrogenase,_mitochondrial-like
LOC121410313	0.0150858	-0.319539	0.246	0.279	1	0	V-type_proton_ATPase_116_kDa_subunit_a1-like
LOC121420114	0.0155814	-0.311767	0.351	0.258	1	0	amyloid-like_protein_1
LOC121406364	0.0166284	-0.393067	0.621	0.611	1	0	uncharacterized_LOC121406364
LOC121409186	0.0171435	-0.309857	0.473	0.466	1	0	alpha-N-acetylgalactosaminidase-like
LOC121428381	0.0175992	-0.292695	0.248	0.282	1	0
LOC121419436	0.018199	-0.322712	0.56	0.529	1	0	actin-related_protein_2-A
LOC121415203	0.0191462	-0.485829	0.44	0.43	1	0	E3_ubiquitin-protein_ligase_arih1-like
LOC121407964	0.0193759	-0.328497	0.797	0.721	1	0	cathepsin_Z-like
LOC121405934	0.0197937	-0.30208	0.438	0.437	1	0	toll-interacting_protein-like
LOC121415947	0.0201037	-0.36053	0.342	0.351	1	0	phosphatidate_phosphatase_LPIN3-like
LOC121425126	0.0202931	-0.896337	0.279	0.3	1	0	myosin_regulatory_light_chain_12A-like
LOC121425138	0.0210397	-0.318617	0.275	0.293	1	0	putative_aminopeptidase_W07G4.4
LOC121413928	0.0213581	-0.359091	0.264	0.292	1	0	protein_mono-ADP-ribosyltransferase_PARP4-like
LOC121407402	0.0231321	-0.28615	0.233	0.265	1	0	tartrate-resistant_acid_phosphatase_type_5-like
LOC121411553	0.0250334	-0.465964	0.473	0.464	1	0	uncharacterized_LOC121411553
LOC121416464	0.0262289	-0.374722	0.582	0.54	1	0	cytochrome_P450_2C15-like
LOC121418433	0.0266415	-0.297855	0.359	0.366	1	0	sphingolipid_delta(4)-desaturase_DES1-like
LOC121422183	0.0266502	-0.342533	0.471	0.442	1	0	myosin-10-like
LOC121422780	0.0270231	-0.334118	0.651	0.584	1	0	myosin-11-like
LOC121421532	0.0274082	-0.382825	0.492	0.473	1	0	uncharacterized_LOC121421532
LOC121413780	0.0281745	-0.579957	0.27	0.297	1	0	sequestosome-1-like
LOC121410216	0.0287743	-0.292149	0.59	0.534	1	0	twinfilin-1-like
LOC121428511	0.0314288	-0.328326	0.558	0.522	1	0	cdc42-interacting_protein_4-like
LOC121418544	0.0315589	-0.326407	0.266	0.289	1	0	pecanex-like_protein_1
LOC121431725	0.0355139	-0.345985	0.248	0.272	1	0	uncharacterized_LOC121431725
LOC121411328	0.0360925	-0.322998	0.257	0.273	1	0	C-Jun-amino-terminal_kinase-interacting_protein_4-like
LOC121408331	0.0370151	-0.300281	0.29	0.308	1	0	gamma-aminobutyric_acid_receptor-associated_protein-like_2
LOC121418780	0.0394098	-0.325994	0.353	0.379	1	0	glutathione-specific_gamma-glutamylcyclotransferase_1-like
LOC121423785	0.0402738	-0.313564	0.24	0.266	1	0	Krueppel-like_factor_6
LOC121431598	0.0407342	-0.300573	0.601	0.561	1	0	coiled-coil_domain-containing_protein_6-like
LOC121420377	0.0408464	-0.266332	0.266	0.287	1	0	uncharacterized_LOC121420377
LOC121431144	0.0416238	-0.267449	0.686	0.66	1	0	syndecan-like
LOC121425418	0.0420537	-0.329124	0.584	0.541	1	0	V-type_proton_ATPase_subunit_e_2-like
LOC121419144	0.0428105	-0.445791	0.277	0.298	1	0	dual_specificity_protein_phosphatase_10-like
LOC121420333	0.0457038	-0.320263	0.229	0.252	1	0	uncharacterized_LOC121420333
LOC121410494	0.0465472	-0.256765	0.292	0.306	1	0	SLIT-ROBO_Rho_GTPase-activating_protein_1-like
LOC121408894	0.0467703	-0.286706	0.275	0.295	1	0	CAP-Gly_domain-containing_linker_protein_1-like
LOC121428459	0.0525337	-0.565914	0.728	0.673	1	0	endoplasmic_reticulum_chaperone_BiP-like
LOC121428196	0.0528606	-0.273433	0.27	0.289	1	0	cdc42_homolog
LOC121405697	0.0542378	-0.302364	0.468	0.44	1	0	anoctamin-4-like
LOC121425998	0.0557487	-0.382354	0.268	0.286	1	0	putative_leucine-rich_repeat-containing_protein_DDB_G0290503
LOC121422185	0.0669699	-0.257758	0.416	0.412	1	0	growth_factor_receptor-bound_protein_2-like
LOC121419306	0.0700938	-0.748265	0.257	0.271	1	0	uncharacterized_LOC121419306
LOC121418654	0.0714483	-0.313625	0.246	0.267	1	0	serum_response_factor-like
LOC121427221	0.0715561	-0.409947	0.257	0.267	1	0	serine/arginine_repetitive_matrix_protein_1-like
LOC121415989	0.0740075	-0.408735	0.379	0.375	1	0	transcription_factor_HIVEP3-like
LOC121424774	0.0743231	-0.251721	0.519	0.502	1	0	RING_finger_protein_44-like
LOC121429404	0.0766459	-0.307011	0.242	0.258	1	0	receptor_tyrosine-protein_kinase_erbB-4-like
LOC121410148	0.0778101	-0.25412	0.728	0.652	1	0	MAP_kinase-activated_protein_kinase_2-like
LOC121423804	0.0783605	-0.313032	0.481	0.45	1	0	V-type_proton_ATPase_21_kDa_proteolipid_subunit-like
LOC121419157	0.0793972	-0.39304	0.392	0.308	1	0	cytochrome_P450_3A6-like
LOC121431763	0.0822677	-0.332289	0.375	0.363	1	0	tetraspanin-5-like
LOC121407898	0.090387	-0.360826	0.477	0.45	1	0	nuclear_factor_of_activated_T-cells_5-like
LOC121418855	0.100211	-0.38227	0.329	0.325	1	0	leucine_repeat_adapter_protein_25-like
LOC121417020	0.101924	-0.263744	0.24	0.254	1	0	rho_GTPase-activating_protein_35-like
LOC121408843	0.102598	-0.269622	0.449	0.419	1	0	actin-related_protein_2/3_complex_subunit_3-B-like
LOC121411297	0.103254	-0.303276	0.257	0.27	1	0	disks_large-associated_protein_4-like
LOC121417424	0.106649	-0.352028	0.312	0.311	1	0	ceramide-1-phosphate_transfer_protein-like
LOC121415207	0.107116	-0.342808	0.357	0.354	1	0	myocyte-specific_enhancer_factor_2A-like
LOC121429693	0.11308	-0.607805	0.305	0.308	1	0	uncharacterized_LOC121429693
LOC121408910	0.114784	-0.290752	0.442	0.422	1	0	dentin_sialophosphoprotein-like
LOC121411540	0.11633	-0.286474	0.359	0.347	1	0	cathepsin_Z-like
LOC121425739	0.122315	-0.257561	0.331	0.33	1	0	TBC1_domain_family_member_14-like
LOC121432238	0.127149	-0.352041	0.39	0.375	1	0	calcium/calmodulin-dependent_protein_kinase_type_II_subunit_alpha-like
LOC121408564	0.133275	-0.378555	0.695	0.64	1	0	large_neutral_amino_acids_transporter_small_subunit_4-like
LOC121410322	0.134199	-0.304519	0.294	0.298	1	0	sorting_nexin-5-like
LOC121424943	0.134843	-0.296823	0.556	0.5	1	0	G_protein-coupled_receptor_kinase_5-like
LOC121430669	0.137754	-0.282556	0.261	0.21	1	0	probable_ATP-dependent_RNA_helicase_DDX60
LOC121431393	0.156256	-0.280194	0.261	0.269	1	0	phosphatase_and_actin_regulator_2-like
LOC121408906	0.156378	-0.395661	0.403	0.389	1	0	active_breakpoint_cluster_region-related_protein-like
LOC121407985	0.170449	-0.287914	0.529	0.479	1	0	vacuolar_protein_sorting-associated_protein_4B-like
LOC100500774	0.176253	-0.286251	0.338	0.33	1	0	forkhead_transcription_factor_N2/3
LOC121414262	0.181532	-0.268988	0.529	0.502	1	0	uncharacterized_LOC121414262
LOC121411446	0.183883	-0.359306	0.281	0.282	1	0	testin-like
LOC121422311	0.184299	-0.261533	0.399	0.384	1	0	casein_kinase_I-like
LOC121428833	0.190033	-0.654947	0.322	0.265	1	0	heat_shock_70_kDa_protein_IV
LOC121421054	0.199888	-0.327771	0.503	0.467	1	0	troponin_I-like
LOC121424812	0.20464	-0.301375	0.427	0.34	1	0	gamma-adducin-like
LOC121426629	0.207264	-0.420583	0.444	0.41	1	0	hydroxyacid_oxidase_1-like
LOC121419421	0.223236	-0.262006	0.394	0.324	1	0	rho_GTPase-activating_protein_7-like
LOC121418266	0.22438	-0.329387	0.266	0.266	1	0	prospero_homeobox_protein_1-like
LOC121424487	0.228612	-0.253282	0.248	0.253	1	0
LOC121418138	0.248997	-0.274689	0.279	0.278	1	0	NF-kappa-B_inhibitor_alpha-like
LOC121416715	0.256769	-0.283593	0.329	0.313	1	0	uncharacterized_LOC121416715
LOC121424881	0.256861	-1.4343	0.309	0.302	1	0	actin,_cytoskeletal
LOC121409309	0.257823	-0.342484	0.257	0.253	1	0	uncharacterized_LOC121409309
LOC121407463	0.265413	-0.392364	0.327	0.308	1	0	uncharacterized_LOC121407463
LOC121421733	0.278403	-0.340416	0.29	0.283	1	0	tetraspanin-9-like
LOC121410444	0.282486	-0.395906	0.37	0.361	1	0	metalloproteinase_inhibitor_1-like
LOC121423262	0.299178	-0.502145	0.353	0.34	1	0	chromobox_protein_homolog_8-like
LOC121408832	0.327034	-0.26371	0.355	0.338	1	0	rho_GTPase-activating_protein_26-like
LOC121421223	0.327274	-0.290017	0.277	0.279	1	0	uncharacterized_LOC121421223
LOC121416754	0.327822	-0.267334	0.434	0.397	1	0	ras-related_protein_Ral-A-like
LOC121428778	0.348702	-0.518795	0.279	0.235	1	0	heat_shock_70_kDa_protein_IV-like
LOC121428983	0.386822	-0.625012	0.649	0.598	1	0	uncharacterized_LOC121428983
LOC121411843	0.399652	-0.266497	0.536	0.488	1	0	endoplasmin-like
LOC121414204	0.467942	-0.262799	0.51	0.455	1	0	E3_ubiquitin-protein_ligase_MYCBP2-like
LOC121420941	0.487412	-0.280661	0.257	0.246	1	0	uncharacterized_LOC121420941
LOC121419271	0.514578	-0.327677	0.349	0.331	1	0	cell_division_control_protein_42_homolog
LOC121418695	0.518215	-0.331779	0.44	0.392	1	0	calpain-A-like
LOC121418566	0.564309	-0.28812	0.673	0.586	1	0	uncharacterized_LOC121418566
LOC121418773	0.593245	-0.367974	0.331	0.305	1	0	fasciculation_and_elongation_protein_zeta-2-like
LOC121418074	0.601566	-0.252299	0.392	0.337	1	0	nesprin-1-like
LOC121405875	0.625754	-0.277692	0.414	0.369	1	0	F-actin-monooxygenase_MICAL3-like
LOC121430553	0.672572	-0.275264	0.288	0.27	1	0	neurocalcin_homolog
LOC121422876	0.764399	-0.332976	0.362	0.324	1	0	uncharacterized_LOC121422876
LOC121424199	0.76557	-0.258878	0.403	0.365	1	0
LOC121418977	0.767433	-0.30733	0.414	0.351	1	0	mitogen-activated_protein_kinase-binding_protein_1-like
LOC121410924	0.820562	-0.328665	0.253	0.226	1	0	neuronal_cell_adhesion_molecule-like
LOC121411638	0.843351	-0.253224	0.464	0.404	1	0	LDLR_chaperone_boca-like
LOC121431622	0.876335	-0.374935	0.266	0.245	1	0	uncharacterized_LOC121431622
LOC121430867	0.901601	-0.441368	0.303	0.273	1	0	uncharacterized_LOC121430867
LOC121418862	0.979412	-0.326061	0.534	0.459	1	0	heat_shock_protein_Hsp-16.48/Hsp-16.49-like
LOC121405789	9.03e-229	3.56461	0.671	0.042	1.6e-224	1	uncharacterized_LOC121405789
LOC121431979	3.28e-192	4.05651	0.665	0.069	5.82e-188	1	cell_wall_protein_IFF6-like
LOC121418839	2.7e-174	2.68144	0.525	0.031	4.79e-170	1	sodium-coupled_monocarboxylate_transporter_1-like
LOC121427612	9e-159	2.36936	0.46	0.022	1.6e-154	1	apolipoprotein_D-like
LOC121431319	9.89e-150	1.65978	0.389	0.01	1.75e-145	1	venom_phosphodiesterase_2-like
LOC121415367	4.45e-148	4.21802	0.599	0.082	7.88e-144	1	arylsulfatase-like
LOC121428865	1.72e-145	1.89139	0.392	0.012	3.04e-141	1	cadherin_EGF_LAG_seven-pass_G-type_receptor_3-like
LOC121430133	1.35e-143	1.77225	0.38	0.011	2.38e-139	1	transcription_factor_Sox-2-like
LOC121417155	2.59e-134	1.87589	0.442	0.031	4.59e-130	1	glycine_N-methyltransferase-like
LOC121418823	1.02e-133	2.718	0.463	0.039	1.81e-129	1	calmodulin-A-like
LOC121430393	6.61e-131	1.34121	0.332	0.007	1.17e-126	1	transcription_factor_Sox-21-B-like
LOC121418701	1.58e-116	2.80475	0.682	0.184	2.8e-112	1	neuroblast_differentiation-associated_protein_AHNAK-like
LOC121411362	1.94e-113	1.42371	0.344	0.017	3.43e-109	1	vicilin-like_seed_storage_protein_At2g18540
LOC121429458	1.87e-109	1.80057	0.32	0.014	3.3e-105	1	scavenger_receptor_cysteine-rich_domain-containing_group_B_protein-like
LOC121426852	3.53e-107	1.2885	0.306	0.011	6.25e-103	1	uncharacterized_LOC121426852
LOC121412744	4.82e-106	1.60409	0.362	0.026	8.53e-102	1	cystatin-B-like
LOC121421075	3.26e-104	2.49351	0.338	0.021	5.78e-100	1	uncharacterized_LOC121421075
LOC121422505	1.63e-103	3.13684	0.668	0.216	2.89e-99	1	uncharacterized_LOC121422505
LOC121416240	7.72e-102	1.27177	0.255	0.004	1.37e-97	1	sodium-dependent_phosphate_transport_protein_2B-like
LOC121431621	9.58e-102	-2.36091	0.318	0.884	1.7e-97	1	SPARC-like
LOC121410635	4.98e-101	1.46357	0.255	0.005	8.82e-97	1	ras-like_protein_rasD
LOC121428864	1.5e-100	1.29409	0.368	0.032	2.66e-96	1	sodium-_and_chloride-dependent_neutral_and_basic_amino_acid_transporter_B(0+)-like
LOC121415639	2.47e-97	1.75389	0.457	0.068	4.38e-93	1	glutamate_receptor_1-like
LOC121419063	1.19e-96	1.18272	0.255	0.006	2.1e-92	1	protein_SPEC3-like
LOC121424828	2.27e-95	1.25747	0.258	0.007	4.02e-91	1	uncharacterized_LOC121424828
LOC121428823	1.39e-90	1.48717	0.285	0.015	2.47e-86	1	uncharacterized_LOC121428823
LOC121422072	1.28e-89	1.25001	0.306	0.021	2.27e-85	1	mucin-17-like
LOC121411860	5.57e-86	1.16266	0.294	0.02	9.86e-82	1	caveolin-3-like
LOC121417027	2.76e-85	3.2013	0.469	0.095	4.89e-81	1	uncharacterized_LOC121417027
LOC121431701	8.32e-82	2.3503	0.439	0.081	1.47e-77	1	S-crystallin_SL11-like
LOC121429185	7.96e-75	-1.8075	0.418	0.885	1.41e-70	1	collagen_alpha-1(V)_chain-like
LOC121415634	6.19e-68	1.45979	0.412	0.083	1.1e-63	1	glutamate_receptor_3-like
LOC121421666	5.08e-66	1.13203	0.267	0.026	9.01e-62	1	tetraspanin-18-like
LOC121424109	1.85e-61	0.981802	0.258	0.027	3.28e-57	1	indole-3-acetic_acid-amido_synthetase_GH3.17-like
LOC121423431	2.47e-60	1.21417	0.27	0.033	4.37e-56	1	aldehyde_dehydrogenase,_mitochondrial-like
LOC121429627	2.13e-58	-1.18175	0.258	0.779	3.78e-54	1	collagen_alpha-5(IV)_chain-like
LOC121407892	9.11e-58	-1.37705	0.335	0.81	1.61e-53	1	peptidyl-prolyl_cis-trans_isomerase_6-like
LOC121409742	6.07e-57	2.81921	0.338	0.065	1.07e-52	1	uncharacterized_LOC121409742
LOC121419265	6.41e-57	-1.10564	0.694	0.948	1.14e-52	1	heat_shock_protein_HSP_90-beta-like
LOC121425215	1.51e-56	1.36615	0.383	0.085	2.68e-52	1	myosin_light_chain_kinase,_smooth_muscle-like
LOC121408360	4.43e-56	0.908519	0.27	0.035	7.85e-52	1	putative_defense_protein_3
LOC121411673	8.56e-56	-1.08972	0.513	0.893	1.52e-51	1	translocon-associated_protein_subunit_delta-like
LOC121405615	2.04e-55	2.46982	0.623	0.288	3.62e-51	1	U6_spliceosomal_RNA
LOC121421046	5.02e-55	-1.56579	0.214	0.689	8.89e-51	1	tetraspanin-6-like
LOC121429133	5.35e-55	1.35468	0.309	0.054	9.47e-51	1	uncharacterized_LOC121429133
LOC121429138	5.55e-54	-1.10465	0.653	0.93	9.83e-50	1	glutamine_synthetase-like
LOC121431829	2e-52	-0.98836	0.528	0.891	3.54e-48	1	ras_GTPase-activating_protein-binding_protein_2-like
LOC121426330	3.11e-52	-0.954507	0.596	0.926	5.52e-48	1	ATP_synthase_subunit_beta,_mitochondrial
LOC121418185	4.74e-51	-1.19972	0.371	0.819	8.41e-47	1	cell_surface_glycoprotein_1-like
LOC121426908	8.73e-51	-0.728687	0.884	0.983	1.55e-46	1	insulin-like_growth_factor_2_mRNA-binding_protein_3
LOC121423374	1.87e-50	-0.578182	0.982	0.998	3.31e-46	1	40S_ribosomal_protein_S2
LOC121408810	4.14e-49	1.28929	0.371	0.095	7.34e-45	1	glutathione_S-transferase_theta-1-like
LOC121428399	4.39e-49	-1.62646	0.338	0.752	7.78e-45	1	actin_CyI,_cytoplasmic
LOC121429798	5.83e-47	-0.970358	0.217	0.712	1.03e-42	1	collagen_alpha-5(IV)_chain-like
LOC121417233	5.14e-46	-1.61311	0.43	0.792	9.11e-42	1	uncharacterized_LOC121417233
LOC121418955	3.59e-45	-0.774962	0.694	0.946	6.35e-41	1	uncharacterized_LOC121418955
LOC121422456	1.41e-44	1.49374	0.353	0.089	2.51e-40	1	uncharacterized_LOC121422456
LOC121428155	2.36e-44	-0.579173	0.944	0.995	4.19e-40	1	eukaryotic_translation_initiation_factor_5A-1-like
LOC121424255	7.15e-44	1.36199	0.359	0.098	1.27e-39	1	rho_GTPase-activating_protein_29-like
LOC121422018	2.58e-43	-0.634928	0.899	0.984	4.58e-39	1	60S_acidic_ribosomal_protein_P0-like
LOC121426250	6.29e-43	-1.1065	0.291	0.739	1.11e-38	1	zinc_metalloproteinase_nas-39-like
LOC121431687	8.24e-43	-0.721388	0.816	0.971	1.46e-38	1	voltage-dependent_anion-selective_channel_protein_2-like
LOC121411428	3.21e-42	-0.61435	0.887	0.98	5.68e-38	1	nucleoside_diphosphate_kinase_A_2-like
LOC121410556	4.04e-42	-1.13044	0.973	0.995	7.15e-38	1	procathepsin_L-like
LOC121423636	2.45e-41	-0.978242	0.691	0.939	4.34e-37	1	calreticulin-like
LOC121420519	3.22e-41	-0.494325	0.958	0.994	5.7e-37	1	40S_ribosomal_protein_S25-like
LOC121418263	4.64e-41	-1.47866	0.139	0.547	8.22e-37	1	calmodulin
LOC121407001	5.33e-41	-1.10167	0.151	0.583	9.43e-37	1	uncharacterized_LOC121407001
LOC121423558	1.19e-40	1.6865	0.555	0.262	2.11e-36	1	uncharacterized_LOC121423558
LOC121420064	2.19e-40	0.866029	0.285	0.062	3.87e-36	1	uncharacterized_LOC121420064
LOC121431023	2.5e-40	-0.456265	0.988	0.998	4.42e-36	1	40S_ribosomal_protein_S20-like
LOC121426284	6.26e-40	1.78869	0.7	0.465	1.11e-35	1	uncharacterized_LOC121426284
LOC121415581	1.65e-39	-0.837298	0.418	0.81	2.92e-35	1	keratinocyte-associated_protein_2-like
LOC121428217	1.69e-39	-0.932714	0.555	0.856	2.99e-35	1	nucleolin-like
LOC121427508	7e-39	3.45782	0.368	0.118	1.24e-34	1	uncharacterized_LOC121427508
LOC121413185	7.44e-39	-1.53685	0.19	0.588	1.32e-34	1
LOC121430846	1.23e-38	-0.773655	0.588	0.9	2.18e-34	1	cytochrome_c_oxidase_subunit_5B,_mitochondrial-like
LOC121414511	1.26e-38	-1.01317	0.312	0.715	2.23e-34	1	tubulin_alpha-2/alpha-4_chain-like
LOC121427950	1.46e-38	-1.47689	0.332	0.713	2.59e-34	1	uncharacterized_LOC121427950
LOC121431737	1.84e-38	-0.570015	0.16	0.598	3.26e-34	1	uncharacterized_LOC121431737
LOC121430638	3.26e-38	1.61338	0.504	0.217	5.77e-34	1	monocarboxylate_transporter_2-like
LOC121426055	2.1e-37	-0.714603	0.697	0.933	3.72e-33	1	cytochrome_c-like
LOC121417052	2.8e-37	-1.63179	0.243	0.626	4.95e-33	1	uncharacterized_LOC121417052
LOC121420173	2.86e-37	-0.85004	0.157	0.579	5.06e-33	1	uncharacterized_LOC121420173
LOC121424436	7.52e-37	-1.14701	0.279	0.676	1.33e-32	1	sodium-_and_chloride-dependent_glycine_transporter_1-like
LOC121415204	9.51e-37	-0.730141	0.638	0.922	1.69e-32	1	cytochrome_c_oxidase_subunit_5A,_mitochondrial-like
LOC121405654	1.69e-36	-1.0367	0.101	0.487	3e-32	1	interferon_alpha-inducible_protein_27-like_protein_1
LOC121406022	6.79e-35	-0.956405	0.131	0.529	1.2e-30	1	interferon_alpha-inducible_protein_27-like_protein_2A
LOC121415559	1.01e-33	-0.67547	0.623	0.905	1.79e-29	1	translocon-associated_protein_subunit_beta-like
LOC121410681	1.61e-33	-1.13525	0.131	0.502	2.85e-29	1	uncharacterized_LOC121410681
LOC121427605	1.5e-32	-0.655315	0.668	0.927	2.65e-28	1	translocon-associated_protein_subunit_gamma-like
LOC121410788	2.96e-32	0.871732	0.297	0.084	5.24e-28	1	uncharacterized_LOC121410788
LOC121422889	4.52e-32	-0.569662	0.822	0.97	8.01e-28	1	ATP_synthase_subunit_f,_mitochondrial-like
LOC121417258	5.53e-32	0.919167	0.371	0.132	9.8e-28	1	epidermal_growth_factor_receptor_kinase_substrate_8-like_protein_2
LOC121417612	2.23e-31	-0.405445	0.985	0.998	3.94e-27	1	40S_ribosomal_protein_S11-like
LOC121418892	3.89e-31	-1.01676	0.128	0.483	6.89e-27	1	homeobox_protein_SIX6-like
LOC121408705	4.77e-31	-0.655323	0.596	0.889	8.45e-27	1	cytochrome_c_oxidase_subunit_4_isoform_1,_mitochondrial-like
LOC121418514	6.47e-31	1.08713	0.953	0.946	1.15e-26	1	uncharacterized_LOC121418514
LOC121430703	7.2e-31	1.20319	0.38	0.149	1.28e-26	1	otoferlin-like
LOC121408801	1.14e-30	-0.364729	0.997	1	2.02e-26	1	60S_acidic_ribosomal_protein_P2-like
LOC121411855	1.54e-30	-0.442885	0.976	0.993	2.73e-26	1	40S_ribosomal_protein_S23
LOC121407456	3.02e-30	-0.770684	0.418	0.763	5.35e-26	1	cytochrome_b-c1_complex_subunit_Rieske,_mitochondrial-like
LOC121416174	5.66e-30	-0.403906	0.958	0.995	1e-25	1	60S_ribosomal_protein_L7-like
LOC121411662	1.09e-29	-0.715059	0.519	0.845	1.94e-25	1	phosphate_carrier_protein,_mitochondrial-like
LOC121425227	1.64e-29	1.75387	0.323	0.11	2.9e-25	1	centrosomal_protein_of_55_kDa-like
LOC121428227	2.23e-29	-0.413868	0.979	0.997	3.95e-25	1	60S_ribosomal_protein_L11
LOC121424778	2.43e-29	-1.12196	0.122	0.457	4.31e-25	1	early_growth_response_protein_1-B-like
gene-DR311-mgr01	3.3e-29	0.555762	1	1	5.85e-25	1
LOC121420133	3.72e-29	-0.364189	0.985	0.997	6.59e-25	1	40S_ribosomal_protein_S19-like
LOC121410649	7.48e-29	-0.743746	0.125	0.479	1.33e-24	1	uncharacterized_LOC121410649
LOC121421729	1.12e-28	-0.676687	0.475	0.819	1.99e-24	1	caprin-1-like
LOC121423030	1.16e-28	-0.610725	0.668	0.926	2.05e-24	1	ATP_synthase_subunit_d,_mitochondrial-like
LOC121424047	1.44e-28	-0.634441	0.62	0.891	2.55e-24	1	ATP_synthase_subunit_delta,_mitochondrial-like
LOC121429767	1.99e-28	-0.84657	0.148	0.494	3.53e-24	1	diacylglycerol_kinase_delta-like
LOC121429387	2.28e-28	-0.346792	0.994	0.998	4.04e-24	1	40S_ribosomal_protein_S26-like
LOC121407996	2.61e-28	-0.636034	0.596	0.887	4.63e-24	1	eukaryotic_translation_initiation_factor_2_subunit_2-like
LOC121424678	3.31e-28	-0.627847	0.344	0.699	5.86e-24	1	mitotic_apparatus_protein_p62-like
LOC121431277	3.49e-28	-0.665377	0.579	0.889	6.19e-24	1	cytochrome_b-c1_complex_subunit_8-like
LOC121424968	7.48e-28	-1.37441	0.184	0.515	1.32e-23	1	uncharacterized_LOC121424968
LOC121422800	8.49e-28	-0.460491	0.923	0.993	1.5e-23	1	40S_ribosomal_protein_S9
LOC121422466	1.08e-27	-0.630382	0.309	0.665	1.91e-23	1	cytochrome_b-c1_complex_subunit_2,_mitochondrial-like
LOC121407057	1.15e-27	-0.41338	0.95	0.988	2.03e-23	1	ADP/ATP_translocase_3-like
LOC121428872	1.29e-27	-0.406988	0.947	0.996	2.29e-23	1	60S_ribosomal_protein_L28-like
LOC121408814	2.4e-27	-0.796261	0.564	0.832	4.24e-23	1	dynein_light_chain_LC6,_flagellar_outer_arm-like
LOC121420399	2.71e-27	-0.639688	0.086	0.409	4.8e-23	1	kin_of_IRRE-like_protein_3
LOC121416018	2.82e-27	-0.647782	0.513	0.838	5e-23	1	translation_elongation_factor_2-like
LOC121430760	3.05e-27	1.34011	0.35	0.126	5.41e-23	1	actin_CyI,_cytoplasmic-like
LOC121420574	3.7e-27	-0.644011	0.392	0.731	6.56e-23	1	polyadenylate-binding_protein_4-like
LOC121407440	4.11e-27	-0.812056	0.169	0.5	7.29e-23	1	large_neutral_amino_acids_transporter_small_subunit_1-like
LOC121414529	5.08e-27	-0.82494	0.276	0.613	9e-23	1	tubulin_alpha-1_chain-like
LOC121419405	5.16e-27	-0.773665	0.157	0.488	9.14e-23	1	cellular_retinoic_acid-binding_protein_1-like
LOC121418777	8.73e-27	-0.726758	0.3	0.65	1.55e-22	1	small_nuclear_ribonucleoprotein_Sm_D2
LOC121410287	9.08e-27	-0.572176	0.35	0.732	1.61e-22	1	proteasome_subunit_alpha_type-2-like
LOC121409301	9.15e-27	-0.567911	0.718	0.934	1.62e-22	1	cytochrome_c_oxidase_subunit_6A,_mitochondrial-like
LOC121408650	1.26e-26	-0.376953	0.976	0.996	2.23e-22	1	60S_ribosomal_protein_L6-like
LOC121424922	1.73e-26	-0.561903	0.668	0.897	3.07e-22	1	small_nuclear_ribonucleoprotein_G-like
LOC121409126	2.21e-26	-0.666721	0.255	0.604	3.92e-22	1	small_nuclear_ribonucleoprotein_Sm_D3-like
LOC121408550	2.84e-26	-0.675626	0.433	0.748	5.02e-22	1	GTP-binding_nuclear_protein_Ran-like
LOC121410974	3.18e-26	-0.78197	0.077	0.38	5.63e-22	1	uncharacterized_LOC121410974
LOC121423703	4.28e-26	-0.676091	0.142	0.464	7.58e-22	1	transcription_factor_BTF3_homolog_4-like
LOC121418432	4.35e-26	-0.661401	0.475	0.785	7.7e-22	1	glycine-rich_RNA-binding_protein_1-like
LOC121407503	6.08e-26	1.23836	0.329	0.126	1.08e-21	1	uncharacterized_LOC121407503
LOC121428830	7.13e-26	-0.721471	0.356	0.681	1.26e-21	1	ubiquitin_carboxyl-terminal_hydrolase_isozyme_L5-like
LOC121410156	8.54e-26	1.06456	0.356	0.14	1.51e-21	1	nucleolar_protein_dao-5-like
LOC121424525	1.34e-25	-0.370021	0.947	0.992	2.37e-21	1	uncharacterized_LOC121424525
LOC121411806	1.63e-25	-0.361544	0.964	0.996	2.88e-21	1	60S_ribosomal_protein_L18a-like
LOC121418633	2.11e-25	-0.600589	0.22	0.547	3.75e-21	1	neutral_and_basic_amino_acid_transport_protein_rBAT-like
LOC121413357	2.38e-25	-0.361254	0.967	0.993	4.21e-21	1	40S_ribosomal_protein_S3a-like
LOC121425063	2.46e-25	-0.634587	0.315	0.652	4.36e-21	1	26S_proteasome_non-ATPase_regulatory_subunit_4-like
LOC121417436	4.49e-25	-0.724064	0.463	0.792	7.95e-21	1	proliferation-associated_protein_2G4-like
LOC121410179	5.5e-25	-0.617846	0.499	0.815	9.75e-21	1	nascent_polypeptide-associated_complex_subunit_alpha-like
LOC121423659	7.24e-25	-0.620371	0.531	0.822	1.28e-20	1	peroxiredoxin-1-like
LOC121427251	8.02e-25	-0.620528	0.392	0.744	1.42e-20	1	dolichyl-diphosphooligosaccharide--protein_glycosyltransferase_48_kDa_subunit-like
LOC121412515	8.15e-25	-0.383457	0.985	0.997	1.44e-20	1	60S_ribosomal_protein_L21-like
LOC121426442	8.19e-25	-0.728126	0.184	0.493	1.45e-20	1	hypoxanthine-guanine_phosphoribosyltransferase-like
LOC121430479	8.42e-25	-0.717089	0.113	0.425	1.49e-20	1	transcription_factor_21-like
LOC121431800	9.2e-25	-0.663799	0.76	0.931	1.63e-20	1	histone_H2A.V
LOC121410444	1.01e-24	-1.01293	0.11	0.407	1.8e-20	1	metalloproteinase_inhibitor_1-like
LOC121419373	1.18e-24	-0.523564	0.27	0.61	2.09e-20	1	multiple_coagulation_factor_deficiency_protein_2_homolog
LOC121423743	1.29e-24	-0.606693	0.623	0.88	2.29e-20	1	thioredoxin-1-like
LOC121420278	1.38e-24	-0.356516	0.976	0.994	2.44e-20	1	ubiquitin
LOC121422490	1.75e-24	-0.46531	0.769	0.952	3.1e-20	1	cytochrome_c_oxidase_subunit_6B1-like
LOC121405843	2.31e-24	-0.62907	0.359	0.682	4.09e-20	1	proteasome_subunit_alpha_type-1-like
LOC121427426	2.43e-24	-0.643256	0.421	0.733	4.3e-20	1	prohibitin-2-like
LOC121415334	2.74e-24	-0.58008	0.424	0.757	4.86e-20	1	uncharacterized_LOC121415334
LOC121426368	3.49e-24	-0.733273	0.068	0.355	6.18e-20	1	cubilin-like
LOC121406279	3.54e-24	-0.628299	0.098	0.406	6.28e-20	1	spondin-1-like
LOC121415187	4.03e-24	1.4431	0.481	0.272	7.14e-20	1	histone-lysine_N-methyltransferase_ASH1L-like
LOC121411555	4.27e-24	-0.505815	0.801	0.955	7.57e-20	1	uncharacterized_LOC121411555
LOC121407387	4.6e-24	-0.679059	0.047	0.326	8.15e-20	1	uncharacterized_LOC121407387
LOC121411589	7.87e-24	-0.63616	0.243	0.571	1.39e-19	1	protein_LLP_homolog
LOC121431736	1.4e-23	-1.04833	0.487	0.755	2.47e-19	1	tubulin_alpha-3_chain-like
LOC121410679	2.11e-23	-0.634952	0.062	0.343	3.75e-19	1	uncharacterized_LOC121410679
LOC121407990	2.62e-23	-0.551164	0.386	0.721	4.63e-19	1	NEDD8
LOC121421134	4.13e-23	-0.406895	0.421	0.765	7.32e-19	1	calumenin-like
LOC121428403	5.95e-23	-0.336258	0.97	0.996	1.05e-18	1	40S_ribosomal_protein_S18
LOC121420512	9.16e-23	-0.399764	0.902	0.983	1.62e-18	1	60S_ribosomal_protein_L19-like
LOC121428158	9.91e-23	-0.620082	0.451	0.777	1.76e-18	1	cytochrome_b-c1_complex_subunit_7-like
LOC121406993	1.59e-22	-0.548156	0.398	0.725	2.82e-18	1	cytochrome_c1,_heme_protein,_mitochondrial-like
LOC121420938	2.26e-22	-0.501015	0.881	0.962	4.01e-18	1	40S_ribosomal_protein_S16-like
LOC121431099	2.61e-22	-0.483192	0.291	0.602	4.63e-18	1	protein_4.1-like
LOC121424051	4.11e-22	-0.613348	0.24	0.548	7.28e-18	1	plasminogen_activator_inhibitor_1_RNA-binding_protein-like
LOC121416939	4.16e-22	-0.589747	0.095	0.376	7.37e-18	1	uncharacterized_LOC121416939
LOC121431021	4.5e-22	-0.295111	0.973	0.999	7.98e-18	1	40S_ribosomal_protein_S12-like
LOC121411742	4.77e-22	-0.567234	0.51	0.824	8.45e-18	1	ATP_synthase_subunit_gamma,_mitochondrial-like
LOC121416034	4.93e-22	-0.401976	0.911	0.992	8.73e-18	1	40S_ribosomal_protein_S15-like
LOC121426050	5.12e-22	1.18104	0.448	0.247	9.08e-18	1	serine/threonine-protein_kinase_17A-like
LOC121418204	7.04e-22	-0.510779	0.128	0.409	1.25e-17	1	sprouty-related,_EVH1_domain-containing_protein_2-like
LOC121420109	7.33e-22	-0.324109	0.988	0.999	1.3e-17	1	60S_acidic_ribosomal_protein_P1-like
LOC121408645	7.49e-22	-0.54993	0.421	0.757	1.33e-17	1	proteasome_maturation_protein-like
LOC121411302	8.05e-22	-0.409913	0.941	0.987	1.43e-17	1	ATP_synthase_F(0)_complex_subunit_C1,_mitochondrial-like
LOC121425418	8.9e-22	-0.593821	0.276	0.597	1.58e-17	1	V-type_proton_ATPase_subunit_e_2-like
LOC121410517	8.9e-22	-0.537855	0.635	0.892	1.58e-17	1	ras-related_protein_Rab-7a-like
LOC121411195	1.08e-21	-0.498535	0.217	0.534	1.91e-17	1	heat_shock_cognate_71_kDa_protein-like
LOC121415818	1.22e-21	-0.534714	0.507	0.828	2.16e-17	1	ATP_synthase_subunit_alpha,_mitochondrial-like
LOC121423984	1.37e-21	-0.512118	0.561	0.861	2.43e-17	1	cytochrome_b-c1_complex_subunit_6,_mitochondrial-like
LOC121407430	2.16e-21	-0.526694	0.457	0.755	3.82e-17	1	uncharacterized_LOC121407430
LOC121410680	2.77e-21	-0.686208	0.027	0.262	4.9e-17	1	uncharacterized_LOC121410680
LOC121410751	2.92e-21	-0.54539	0.092	0.359	5.17e-17	1	ETS_translocation_variant_1-like
LOC121416183	3.28e-21	-0.429882	0.917	0.987	5.82e-17	1	14-3-3-like_protein_2
LOC121422594	3.49e-21	-0.577329	0.047	0.295	6.18e-17	1	methyltransferase-like_protein_27
LOC121405795	4.11e-21	-0.53596	0.62	0.878	7.27e-17	1	transmembrane_protein_258
gene-DR311-mgr02	4.19e-21	0.37023	1	1	7.42e-17	1
LOC121410604	4.78e-21	-0.694344	0.415	0.715	8.47e-17	1	serine--tRNA_ligase,_cytoplasmic-like
LOC121408139	4.95e-21	-0.558495	0.487	0.766	8.77e-17	1	proteasome_subunit_beta_type-5-like
LOC121414416	7.45e-21	-0.373194	0.923	0.99	1.32e-16	1	40S_ribosomal_protein_S4-like
LOC121413980	1.09e-20	-0.537932	0.27	0.576	1.93e-16	1	heterogeneous_nuclear_ribonucleoprotein_R-like
LOC121419306	1.23e-20	1.59805	0.43	0.24	2.18e-16	1	uncharacterized_LOC121419306
LOC121429453	1.42e-20	-0.632644	0.196	0.485	2.52e-16	1	H/ACA_ribonucleoprotein_complex_subunit_DKC1-like
LOC121419686	1.45e-20	-0.789793	0.062	0.308	2.58e-16	1	transcription_factor_GATA-3-like
LOC121418926	1.56e-20	-0.477946	0.7	0.947	2.76e-16	1	uncharacterized_LOC121418926
LOC121408797	1.61e-20	-0.487315	0.412	0.736	2.84e-16	1	eukaryotic_translation_initiation_factor_3_subunit_C-like
LOC121423694	1.92e-20	-0.550715	0.211	0.501	3.4e-16	1	transcription_factor_BTF3_homolog_4-like
LOC121409216	2.46e-20	-0.553768	0.395	0.686	4.36e-16	1	aminoacyl_tRNA_synthase_complex-interacting_multifunctional_protein_1-like
LOC121427284	2.47e-20	-0.43808	0.303	0.633	4.38e-16	1	heterogeneous_nuclear_ribonucleoprotein_K_homolog
LOC121418169	2.5e-20	-0.305333	0.97	0.996	4.44e-16	1	ubiquitin-like_protein_FUBI
LOC121409138	2.93e-20	-0.540122	0.306	0.601	5.2e-16	1	ran-specific_GTPase-activating_protein-like
LOC121427662	3.73e-20	-0.567648	0.246	0.544	6.61e-16	1	calsyntenin-1-like
LOC121429713	3.94e-20	-0.569484	0.243	0.539	6.99e-16	1	collagen_alpha-1(I)_chain-like
LOC121427466	6.07e-20	-0.56121	0.596	0.862	1.08e-15	1	glyceraldehyde-3-phosphate_dehydrogenase-like
LOC121418813	6.08e-20	-0.599537	0.433	0.717	1.08e-15	1	galectin-8-like
LOC121415355	6.3e-20	-0.508318	0.472	0.773	1.12e-15	1	protein_disulfide-isomerase_A3-like
LOC121425503	6.49e-20	-0.502644	0.125	0.398	1.15e-15	1	transcription_factor_AP-4-like
LOC121424308	7.55e-20	-0.503285	0.053	0.293	1.34e-15	1	trans-1,2-dihydrobenzene-1,2-diol_dehydrogenase-like
LOC121423170	8.4e-20	0.848784	0.769	0.76	1.49e-15	1	CD63_antigen-like
LOC121422462	8.44e-20	-0.561828	0.421	0.726	1.5e-15	1	prohibitin-like
LOC121407404	1.26e-19	-0.459849	0.365	0.679	2.23e-15	1	proteasome_subunit_alpha_type-7
LOC121407964	1.28e-19	-0.565103	0.504	0.777	2.27e-15	1	cathepsin_Z-like
LOC121421431	1.37e-19	-0.479422	0.38	0.681	2.42e-15	1	myotrophin-like
LOC121428202	1.67e-19	-0.442118	0.813	0.956	2.96e-15	1	Y-box_factor_homolog
LOC121415352	1.91e-19	-0.311279	0.982	0.994	3.38e-15	1	40S_ribosomal_protein_S17-like
LOC121425160	2.6e-19	-0.51383	0.338	0.637	4.6e-15	1	succinate--CoA_ligase_[ADP/GDP-forming]_subunit_alpha,_mitochondrial-like
LOC121432077	2.7e-19	-0.41069	0.887	0.969	4.79e-15	1	heterogeneous_nuclear_ribonucleoprotein_D-like
LOC121415608	2.82e-19	-0.354232	0.955	0.995	5e-15	1	60S_ribosomal_protein_L17-like
LOC121414417	3.01e-19	-0.905014	0.139	0.401	5.33e-15	1	alpha-taxilin-like
LOC121408427	3.17e-19	-0.50601	0.142	0.407	5.62e-15	1	coiled-coil-helix-coiled-coil-helix_domain-containing_protein_2-like
LOC121423267	3.56e-19	-0.342355	0.947	0.989	6.3e-15	1	histone_H3.3A
LOC121429618	4.11e-19	-0.453188	0.169	0.453	7.28e-15	1	glycogenin-1-like
LOC121407689	4.17e-19	-0.556706	0.083	0.33	7.39e-15	1	peptidyl-prolyl_cis-trans_isomerase_6-like
LOC121415652	4.42e-19	-0.548625	0.157	0.432	7.84e-15	1	microtubule-associated_protein_1B-like
LOC121415546	4.76e-19	-0.501553	0.267	0.574	8.43e-15	1	asparagine--tRNA_ligase,_cytoplasmic-like
LOC121418890	5.45e-19	-0.60423	0.047	0.277	9.65e-15	1	homeobox_protein_SIX6-like
LOC121414332	5.7e-19	-0.324296	0.973	0.994	1.01e-14	1	60S_ribosomal_protein_L13a-like
LOC121421406	5.83e-19	-0.458159	0.682	0.89	1.03e-14	1	protein_transport_protein_Sec61_subunit_beta-like
LOC121410689	8.27e-19	-0.749596	0.077	0.322	1.47e-14	1	collagen_alpha-1(I)_chain-like
LOC121428562	8.7e-19	-0.483599	0.16	0.425	1.54e-14	1	eukaryotic_translation_initiation_factor_3_subunit_G-like
LOC121430841	1.02e-18	-0.324143	0.97	0.996	1.8e-14	1	40S_ribosomal_protein_S21-like
LOC121427378	1.1e-18	-0.459436	0.312	0.612	1.96e-14	1	NADH_dehydrogenase_[ubiquinone]_1_beta_subcomplex_subunit_5,_mitochondrial-like
LOC121428341	1.11e-18	-0.524784	0.608	0.842	1.96e-14	1	protein_SET-like
LOC121432038	1.21e-18	-0.477306	0.092	0.34	2.14e-14	1	atrophin-1-like
LOC121411514	1.24e-18	-0.453601	0.228	0.524	2.19e-14	1	HIG1_domain_family_member_1A,_mitochondrial-like
LOC121425929	1.42e-18	-0.440583	0.602	0.876	2.52e-14	1	ADP-ribosylation_factor_1-like
LOC121407540	1.75e-18	-0.536206	0.181	0.448	3.1e-14	1	lysosomal_protective_protein-like
LOC121415695	1.77e-18	-0.513754	0.116	0.364	3.13e-14	1	ATP_synthase_subunit_alpha,_mitochondrial-like
LOC121423603	2.07e-18	0.721157	0.442	0.228	3.67e-14	1	lateral_signaling_target_protein_2_homolog
LOC121409255	2.14e-18	-0.299164	0.967	0.996	3.79e-14	1	60S_ribosomal_protein_L23a-like
LOC121410178	3.13e-18	-0.528132	0.537	0.79	5.55e-14	1	heterogeneous_nuclear_ribonucleoprotein_A3-like
LOC121418567	3.13e-18	1.10707	0.528	0.393	5.55e-14	1	uncharacterized_LOC121418567
LOC121405977	4.61e-18	-0.740059	0.81	0.948	8.17e-14	1
LOC121418929	5.06e-18	1.13768	0.421	0.233	8.96e-14	1	circularly_permutated_Ras_protein_1-like
LOC121417187	5.21e-18	-0.296927	0.973	0.995	9.24e-14	1	60S_ribosomal_protein_L32-like
LOC121405922	5.53e-18	-0.501021	0.436	0.736	9.8e-14	1	NADH_dehydrogenase_[ubiquinone]_1_beta_subcomplex_subunit_2,_mitochondrial-like
LOC121406014	5.84e-18	-0.506733	0.582	0.85	1.03e-13	1	ATP_synthase_F(0)_complex_subunit_B1,_mitochondrial-like
LOC121428545	6.15e-18	-0.5273	0.065	0.301	1.09e-13	1	ficolin-3-like
LOC121425875	6.72e-18	-0.522777	0.546	0.793	1.19e-13	1	elongation_factor_1-beta-like
LOC121427570	6.8e-18	-0.606073	0.318	0.596	1.21e-13	1	vigilin-like
LOC121422269	7.57e-18	-0.493186	0.519	0.814	1.34e-13	1	protein_disulfide-isomerase-like
LOC121428750	8.28e-18	-0.486344	0.223	0.496	1.47e-13	1	nucleolar_protein_58-like
LOC121411972	8.5e-18	-0.42789	0.32	0.629	1.51e-13	1	coatomer_subunit_zeta-1-like
LOC121419906	8.85e-18	-0.445837	0.677	0.921	1.57e-13	1	ATP_synthase_subunit_g,_mitochondrial-like
LOC121410645	9.88e-18	-0.516475	0.199	0.46	1.75e-13	1	DNA-directed_RNA_polymerase_I_subunit_RPA34-like
LOC121410354	1.05e-17	-0.868503	0.08	0.308	1.86e-13	1	thrombospondin_type-1_domain-containing_protein_7A-like
LOC121423036	1.38e-17	-0.509564	0.282	0.554	2.45e-13	1	serine/arginine-rich_splicing_factor_2-like
LOC121417185	1.68e-17	-0.448117	0.3	0.585	2.97e-13	1	26S_proteasome_regulatory_subunit_6A-B
LOC121409239	1.85e-17	-0.385249	0.837	0.971	3.28e-13	1	14-3-3_family_protein_artA-like
LOC121410910	1.9e-17	-0.541376	0.558	0.804	3.37e-13	1	endonuclease_8-like_2
LOC121411829	2.63e-17	-0.457331	0.407	0.693	4.65e-13	1	inactive_selenide,_water_dikinase-like_protein
LOC121427614	2.63e-17	-0.53917	0.196	0.45	4.66e-13	1	AP-2_complex_subunit_mu
LOC121417536	3.3e-17	-0.467636	0.789	0.95	5.86e-13	1	60S_ribosomal_protein_L15-like
LOC121406174	3.38e-17	-1.61517	0.145	0.374	5.99e-13	1	aqualysin-1-like
LOC121425624	3.67e-17	-0.427362	0.748	0.943	6.49e-13	1	uncharacterized_LOC121425624
LOC121429862	3.74e-17	-0.448416	0.481	0.765	6.62e-13	1	uncharacterized_LOC121429862
LOC121428529	3.8e-17	-0.53346	0.134	0.387	6.73e-13	1	laminin_subunit_gamma-1-like
LOC121418824	4e-17	-0.436294	0.721	0.931	7.09e-13	1	cytochrome_c_oxidase_subunit_7A2,_mitochondrial-like
LOC121420106	4.08e-17	-0.405453	0.125	0.373	7.22e-13	1	heterogeneous_nuclear_ribonucleoprotein_K-like
LOC121426200	7.67e-17	-0.589394	0.368	0.645	1.36e-12	1	RNA-binding_motif,_single-stranded-interacting_protein_2-like
LOC121418780	7.69e-17	-0.627925	0.151	0.412	1.36e-12	1	glutathione-specific_gamma-glutamylcyclotransferase_1-like
LOC121415573	7.8e-17	-0.518339	0.507	0.769	1.38e-12	1	proteasome_subunit_alpha_type-4-like
LOC121424994	8.53e-17	-0.317153	0.976	0.996	1.51e-12	1	uncharacterized_LOC121424994
LOC121426719	9.07e-17	-0.325765	0.955	0.99	1.61e-12	1	60S_ribosomal_protein_L37a-like
LOC121411018	1.06e-16	-0.417102	0.374	0.666	1.87e-12	1	ubiquitin-like_modifier-activating_enzyme_1
LOC121411597	1.07e-16	-0.343402	0.255	0.539	1.89e-12	1
LOC121410963	1.08e-16	-0.450625	0.187	0.448	1.92e-12	1	dipeptidyl_peptidase_1-like
LOC121413184	1.25e-16	-0.732866	0.142	0.39	2.21e-12	1
LOC121421457	1.26e-16	-0.39132	0.098	0.335	2.24e-12	1	uncharacterized_LOC121421457
LOC121411122	1.58e-16	-0.449707	0.341	0.628	2.8e-12	1	heat_shock_cognate_71_kDa_protein-like
LOC121405971	1.92e-16	-0.50048	0.151	0.387	3.41e-12	1	39S_ribosomal_protein_L23,_mitochondrial-like
LOC121418911	2.05e-16	-0.48114	0.309	0.603	3.63e-12	1	EH_domain-containing_protein_1-like
LOC121426265	2.38e-16	-0.404003	0.228	0.493	4.22e-12	1	proteasome_subunit_beta_type-3-like
LOC121423232	2.51e-16	-0.330078	0.338	0.642	4.45e-12	1	28_kDa_heat-_and_acid-stable_phosphoprotein-like
LOC121422207	2.6e-16	-0.281165	0.997	0.998	4.61e-12	1	40S_ribosomal_protein_S8-like
LOC121428669	2.72e-16	-0.362082	0.309	0.584	4.81e-12	1	endothelial_differentiation-related_factor_1-like
LOC121409998	2.93e-16	-0.445537	0.16	0.407	5.2e-12	1	mesencephalic_astrocyte-derived_neurotrophic_factor_homolog
LOC121418253	3.4e-16	-0.445866	0.142	0.376	6.03e-12	1	COMM_domain-containing_protein_1-like
LOC121426214	3.82e-16	-0.601137	0.077	0.29	6.78e-12	1	uncharacterized_LOC121426214
LOC121407329	3.87e-16	-0.490829	0.095	0.326	6.86e-12	1	dachshund_homolog_1-like
LOC121426742	4.2e-16	-0.500824	0.228	0.474	7.44e-12	1	co-chaperone_protein_p23-1-like
LOC121429703	4.33e-16	-0.464835	0.142	0.388	7.68e-12	1	eukaryotic_translation_initiation_factor_2A-like
LOC121411735	4.92e-16	-0.282956	0.976	0.995	8.72e-12	1	60S_ribosomal_protein_L31-like
LOC121411903	5.15e-16	-0.44537	0.365	0.641	9.12e-12	1	proteasome_subunit_beta_type-4-like
LOC121411391	5.19e-16	-0.43351	0.166	0.418	9.2e-12	1	epoxide_hydrolase_3-like
LOC100134945	5.59e-16	-0.424129	0.338	0.612	9.91e-12	1	mortalin
LOC121410199	6.11e-16	-0.483823	0.258	0.517	1.08e-11	1	laminin_subunit_beta-1-like
LOC121424199	6.37e-16	-0.458812	0.157	0.41	1.13e-11	1
LOC121409325	7.32e-16	-0.397062	0.193	0.441	1.3e-11	1	probable_RNA-binding_protein_19
LOC121408825	8.04e-16	-0.411584	0.46	0.749	1.42e-11	1	uncharacterized_LOC121408825
LOC121407519	8.29e-16	-0.692111	0.104	0.328	1.47e-11	1	forkhead_box_protein_C2-B-like
LOC121425505	9.8e-16	-0.294379	0.964	0.997	1.74e-11	1	60S_ribosomal_protein_L26-like
LOC121423024	1.21e-15	-0.416194	0.469	0.757	2.14e-11	1	acyl_carrier_protein,_mitochondrial-like
LOC121417553	1.24e-15	-0.365841	0.902	0.979	2.19e-11	1	60S_ribosomal_protein_L15-like
LOC121428167	1.38e-15	-0.464341	0.487	0.756	2.45e-11	1	squalene_synthase-like
LOC121420375	1.43e-15	-0.433606	0.383	0.661	2.53e-11	1	sodium/potassium-transporting_ATPase_subunit_alpha-3-like
LOC121427560	1.43e-15	-0.253598	0.979	0.991	2.54e-11	1	60S_ribosomal_protein_L22
LOC121415629	1.46e-15	-0.364846	0.181	0.434	2.59e-11	1	DET1-_and_DDB1-associated_protein_1-like
LOC121427831	1.6e-15	-0.404736	0.116	0.342	2.83e-11	1	multiple_epidermal_growth_factor-like_domains_protein_6
LOC121430016	1.61e-15	-0.433657	0.454	0.73	2.86e-11	1	ATP-dependent_RNA_helicase_DDX3Y-like
LOC121410275	1.65e-15	-0.40637	0.071	0.281	2.93e-11	1	mucin-17-like
LOC121428459	1.67e-15	0.843365	0.451	0.724	2.96e-11	1	endoplasmic_reticulum_chaperone_BiP-like
LOC121409137	1.68e-15	-0.340703	0.341	0.609	2.98e-11	1	NADH-ubiquinone_oxidoreductase_subunit_8-like
LOC121424764	1.75e-15	-0.402194	0.243	0.495	3.1e-11	1	nucleolar_protein_56-like
LOC121422718	1.8e-15	-0.350379	0.653	0.885	3.19e-11	1	cyclic_AMP-dependent_transcription_factor_ATF-4-like
LOC121418186	1.97e-15	-0.458057	0.748	0.924	3.49e-11	1	60S_ribosomal_protein_L30-like
LOC121431806	2.02e-15	-0.252824	0.985	0.997	3.59e-11	1	40S_ribosomal_protein_S24-like
LOC121418973	2.45e-15	-0.315455	0.16	0.402	4.33e-11	1	ribosome_biogenesis_protein_NOP53-like
LOC121418945	2.49e-15	1.03074	0.469	0.319	4.41e-11	1	microtubule-associated_proteins_1A/1B_light_chain_3C-like
LOC121411010	2.6e-15	-0.391056	0.383	0.676	4.61e-11	1	NADH_dehydrogenase_[ubiquinone]_1_alpha_subcomplex_subunit_5-like
LOC121421101	2.65e-15	-0.395525	0.151	0.39	4.69e-11	1	protein_arginine_N-methyltransferase_1-like
LOC121420210	2.69e-15	-0.421371	0.552	0.821	4.77e-11	1	ATP_synthase-coupling_factor_6,_mitochondrial-like
LOC121423982	2.91e-15	-0.48035	0.184	0.429	5.16e-11	1	very_low-density_lipoprotein_receptor-like
LOC121427577	3.75e-15	-0.397962	0.202	0.451	6.64e-11	1	nucleolin-like
LOC121413389	4.55e-15	-0.396294	0.128	0.353	8.07e-11	1	Krueppel-like_factor_12
LOC121424812	4.75e-15	1.04622	0.475	0.337	8.41e-11	1	gamma-adducin-like
LOC121415393	4.77e-15	-0.384097	0.16	0.395	8.44e-11	1	lamin-B1-like
LOC121417127	5.15e-15	-0.436246	0.273	0.532	9.13e-11	1	NADH_dehydrogenase_[ubiquinone]_1_alpha_subcomplex_subunit_11-like
LOC121415061	5.46e-15	-0.380771	0.499	0.757	9.67e-11	1	small_ubiquitin-related_modifier_3-like
LOC121410491	7.62e-15	-0.71845	0.7	0.9	1.35e-10	1	gamma-interferon-inducible_lysosomal_thiol_reductase-like
LOC121408275	8.09e-15	-0.375119	0.344	0.613	1.43e-10	1	NADH_dehydrogenase_[ubiquinone]_iron-sulfur_protein_6,_mitochondrial-like
LOC121424943	9.13e-15	-0.396318	0.288	0.55	1.62e-10	1	G_protein-coupled_receptor_kinase_5-like
LOC121427486	9.9e-15	-0.309813	0.214	0.464	1.75e-10	1	2-phosphoxylose_phosphatase_1-like
LOC121410251	1.05e-14	-0.41067	0.181	0.419	1.86e-10	1	transcription_factor_12-like
LOC121413919	1.1e-14	1.30537	0.463	0.338	1.96e-10	1	protein_held_out_wings-like
LOC121417735	1.11e-14	-0.400023	0.528	0.808	1.97e-10	1	eukaryotic_translation_initiation_factor_1-like
LOC121431719	1.2e-14	-0.268052	0.973	0.997	2.12e-10	1	40S_ribosomal_protein_S14a
LOC121422897	1.36e-14	-0.35857	0.19	0.438	2.41e-10	1	nuclear_distribution_protein_nudE-like_1-A
LOC121417224	1.37e-14	-0.336328	0.507	0.78	2.42e-10	1	pumilio_homolog_2-like
LOC121421717	1.38e-14	-0.316869	0.893	0.986	2.45e-10	1	40S_ribosomal_protein_S13
LOC121419241	1.51e-14	-0.315198	0.157	0.394	2.67e-10	1	mitochondrial_import_receptor_subunit_TOM20_homolog
LOC121430246	1.64e-14	-0.371902	0.196	0.429	2.9e-10	1	protein_IWS1_homolog
LOC121414295	1.64e-14	-0.414403	0.412	0.672	2.9e-10	1	NADH_dehydrogenase_[ubiquinone]_1_beta_subcomplex_subunit_4-like
LOC121423147	1.67e-14	-0.34797	0.433	0.713	2.96e-10	1	NADH_dehydrogenase_[ubiquinone]_1_alpha_subcomplex_subunit_6-like
LOC121405859	1.78e-14	0.94708	0.703	0.638	3.15e-10	1	uncharacterized_LOC121405859
LOC121408889	1.8e-14	-0.331913	0.279	0.533	3.18e-10	1	serine/arginine-rich_splicing_factor_1-like
LOC121416346	1.84e-14	-0.382442	0.154	0.385	3.25e-10	1	46_kDa_FK506-binding_nuclear_protein-like
LOC121408872	2.29e-14	0.775314	0.282	0.133	4.06e-10	1	uncharacterized_LOC121408872
LOC121410947	2.65e-14	-0.407249	0.513	0.781	4.69e-10	1	high_mobility_group_protein_1_homolog
LOC121423686	2.71e-14	-0.396888	0.246	0.487	4.8e-10	1	probable_rRNA-processing_protein_EBP2
LOC121425394	2.9e-14	-0.438731	0.65	0.87	5.13e-10	1	uncharacterized_LOC121425394
LOC121427832	2.94e-14	-0.356636	0.104	0.319	5.21e-10	1	glycosyltransferase_8_domain-containing_protein_1-like
LOC121418647	3.09e-14	-0.41506	0.374	0.654	5.48e-10	1	alpha-actinin-like
LOC121411350	3.57e-14	-0.295513	0.184	0.424	6.32e-10	1	protogenin_B-like
LOC121422871	4.29e-14	-0.368419	0.086	0.289	7.61e-10	1	urease_accessory_protein_F-like
LOC121425605	4.78e-14	-0.318732	0.329	0.612	8.47e-10	1	dnaJ_homolog_subfamily_C_member_21-like
LOC121411460	4.81e-14	-0.409056	0.32	0.579	8.51e-10	1	pyruvate_dehydrogenase_E1_component_subunit_beta,_mitochondrial-like
LOC121422821	4.98e-14	-0.363497	0.131	0.35	8.83e-10	1	proline-rich_protein_12-like
LOC121408305	5.21e-14	-0.434439	0.249	0.481	9.24e-10	1	NADH_dehydrogenase_[ubiquinone]_1_beta_subcomplex_subunit_9-like
LOC121421007	5.47e-14	-0.406656	0.656	0.876	9.7e-10	1	ATPase_inhibitor_A,_mitochondrial-like
LOC121408055	5.53e-14	-0.31947	0.436	0.713	9.8e-10	1	core-binding_factor_subunit_beta-like
LOC121419051	5.56e-14	-0.281103	0.312	0.585	9.86e-10	1	heterogeneous_nuclear_ribonucleoprotein_L-like
LOC121418323	5.89e-14	-0.286768	0.267	0.515	1.04e-09	1	ribosome-binding_protein_1-like
LOC121407357	5.9e-14	-0.499505	0.071	0.259	1.04e-09	1	ATP-dependent_RNA_helicase_DDX1-like
LOC121410665	5.92e-14	-0.349224	0.258	0.513	1.05e-09	1	eukaryotic_translation_initiation_factor_4B-like
LOC121430994	5.99e-14	-0.301823	0.297	0.558	1.06e-09	1	uncharacterized_LOC121430994
LOC121429286	6.14e-14	-0.512405	0.211	0.439	1.09e-09	1	uncharacterized_LOC121429286
LOC121409076	6.43e-14	-0.361128	0.246	0.502	1.14e-09	1	prefoldin_subunit_6-like
LOC121408698	7.11e-14	-0.343969	0.353	0.628	1.26e-09	1	RNA-binding_protein_cabeza-like
LOC121430677	7.2e-14	-0.44203	0.148	0.372	1.28e-09	1	myc_protein-like
LOC121411024	7.34e-14	-0.351569	0.338	0.622	1.3e-09	1	NADH_dehydrogenase_[ubiquinone]_1_alpha_subcomplex_subunit_12-like
LOC121413578	7.49e-14	1.43913	0.668	0.602	1.33e-09	1	uncharacterized_LOC121413578
LOC121421110	7.95e-14	-0.259545	0.97	0.995	1.41e-09	1	60S_ribosomal_protein_L27a-like
LOC121428662	1.41e-13	-0.333542	0.119	0.328	2.49e-09	1	uncharacterized_LOC121428662
LOC121415054	1.46e-13	-0.313542	0.246	0.495	2.59e-09	1	adenylate_kinase_isoenzyme_6-like
LOC121414272	1.46e-13	-0.397772	0.291	0.529	2.59e-09	1	eukaryotic_translation_initiation_factor_2_subunit_3
LOC121416207	1.63e-13	-0.49726	0.267	0.509	2.89e-09	1	tubulin_beta_chain-like
LOC121418217	1.76e-13	-0.319783	0.139	0.354	3.12e-09	1	enhancer_of_rudimentary_homolog
LOC121410607	1.78e-13	-0.40872	0.582	0.798	3.15e-09	1	high_mobility_group-T_protein-like
LOC121422346	1.81e-13	-0.368993	0.226	0.471	3.21e-09	1	cytohesin-1-like
LOC121411615	1.83e-13	-0.408046	0.163	0.381	3.24e-09	1	SWI/SNF-related_matrix-associated_actin-dependent_regulator_of_chromatin_subfamily_E_member_1-like
LOC121411553	1.84e-13	1.13052	0.567	0.448	3.25e-09	1	uncharacterized_LOC121411553
LOC121418776	1.92e-13	-0.388497	0.507	0.769	3.39e-09	1	peptidyl-prolyl_cis-trans_isomerase_FKBP2-like
LOC121408602	2.03e-13	-0.337171	0.083	0.276	3.6e-09	1	ataxin-2-like
LOC121418613	2.39e-13	-0.374646	0.436	0.712	4.24e-09	1	proteasome_subunit_alpha_type-6-like
LOC121407737	2.48e-13	-0.353336	0.077	0.263	4.39e-09	1	protein_LSM14_homolog_A-like
LOC121418538	2.63e-13	-0.328921	0.175	0.401	4.67e-09	1	stress-induced-phosphoprotein_1-like
LOC121407829	2.78e-13	-0.345998	0.285	0.525	4.93e-09	1	uncharacterized_LOC121407829
LOC121431749	3.13e-13	0.843763	0.264	0.126	5.55e-09	1	synaptopodin_2-like_protein
LOC121410023	3.78e-13	-0.376595	0.228	0.461	6.7e-09	1	28S_ribosomal_protein_S33,_mitochondrial-like
LOC121410483	3.82e-13	-0.319864	0.326	0.599	6.78e-09	1	protein_CDV3_homolog
LOC121411745	3.89e-13	-0.357464	0.484	0.762	6.88e-09	1	methionine_aminopeptidase_2-like
LOC121423226	4.1e-13	-0.385422	0.234	0.472	7.27e-09	1	THO_complex_subunit_4-like
LOC121426805	4.82e-13	-0.337497	0.208	0.439	8.55e-09	1	MICOS_complex_subunit_MIC27-like
LOC121430031	5.07e-13	1.04129	0.635	0.569	8.99e-09	1	arginine_and_glutamate-rich_protein_1-like
LOC121408433	5.51e-13	-0.37516	0.208	0.445	9.76e-09	1	uncharacterized_LOC121408433
LOC121427663	5.71e-13	-0.356457	0.243	0.484	1.01e-08	1	MICOS_complex_subunit_Mic10-like
LOC121426212	5.78e-13	-0.401799	0.151	0.361	1.02e-08	1	D-3-phosphoglycerate_dehydrogenase-like
LOC121427260	5.89e-13	-0.370246	0.169	0.381	1.04e-08	1	cyclin-dependent_kinase_11B-like
LOC121430149	6.03e-13	-0.343248	0.469	0.714	1.07e-08	1	glypican-6-like
LOC121425645	6.36e-13	-0.429845	0.326	0.571	1.13e-08	1	lupus_La_protein_homolog
LOC121429193	6.41e-13	-0.408321	0.273	0.491	1.14e-08	1	high_affinity_copper_uptake_protein_1-like
LOC121426517	6.42e-13	-0.357506	0.267	0.509	1.14e-08	1	NADH_dehydrogenase_[ubiquinone]_1_beta_subcomplex_subunit_3-like
LOC121411121	6.72e-13	-0.30171	0.935	0.986	1.19e-08	1	60S_ribosomal_protein_L23
LOC121426211	7.5e-13	-0.3356	0.151	0.356	1.33e-08	1	SWI/SNF-related_matrix-associated_actin-dependent_regulator_of_chromatin_subfamily_A_member_5-like
LOC121422339	8.2e-13	-0.381616	0.163	0.37	1.45e-08	1	39S_ribosomal_protein_L12,_mitochondrial-like
LOC121423744	8.8e-13	-0.483604	0.148	0.355	1.56e-08	1	Krueppel-like_factor_5
LOC121418299	1.13e-12	-0.278301	0.24	0.472	2e-08	1	N-alpha-acetyltransferase_20-like
LOC121411148	1.2e-12	-0.288081	0.154	0.371	2.12e-08	1	mitochondrial-processing_peptidase_subunit_beta-like
LOC121411410	1.21e-12	-0.431021	0.448	0.681	2.15e-08	1	acidic_leucine-rich_nuclear_phosphoprotein_32_family_member_B-like
LOC121422424	1.28e-12	-0.361617	0.291	0.528	2.27e-08	1	RNA-binding_protein_with_serine-rich_domain_1-like
LOC121419262	1.3e-12	-0.333571	0.341	0.599	2.3e-08	1	Golgi_resident_protein_GCP60-like
LOC121410380	1.3e-12	-0.339596	0.19	0.41	2.3e-08	1	LIM_and_SH3_domain_protein_Lasp-like
LOC121423953	1.34e-12	-0.293853	0.193	0.418	2.37e-08	1	NADH_dehydrogenase_[ubiquinone]_1_alpha_subcomplex_subunit_7-like
LOC121422352	1.38e-12	-0.343294	0.231	0.455	2.45e-08	1	aconitate_hydratase,_mitochondrial-like
LOC121420072	1.46e-12	-0.288087	0.166	0.38	2.59e-08	1	N-alpha-acetyltransferase_50-like
LOC121427522	1.54e-12	-0.444602	0.202	0.423	2.72e-08	1	transcription_factor_HES-1-like
LOC121415660	1.55e-12	-0.312187	0.436	0.688	2.75e-08	1	activated_RNA_polymerase_II_transcriptional_coactivator_p15-like
LOC121418341	1.77e-12	-0.359694	0.205	0.427	3.14e-08	1	UBX_domain-containing_protein_1-like
LOC121416241	1.91e-12	-0.409514	0.086	0.269	3.38e-08	1	uncharacterized_LOC121416241
LOC121422190	1.91e-12	-0.35159	0.368	0.632	3.38e-08	1	ER_lumen_protein-retaining_receptor_2
LOC446190	1.95e-12	-0.369949	0.777	0.933	3.45e-08	1	guanine_nucleotide-binding_protein_G(i)_alpha_subunit
LOC121418695	2.01e-12	0.962219	0.493	0.386	3.56e-08	1	calpain-A-like
LOC121428802	2.06e-12	-0.347438	0.561	0.792	3.65e-08	1	bromodomain-containing_protein_3-like
LOC121423589	2.2e-12	-0.34488	0.249	0.482	3.89e-08	1	histone-binding_protein_N1/N2-like
LOC121423590	2.22e-12	-0.366041	0.092	0.275	3.94e-08	1	phenylalanine--tRNA_ligase_alpha_subunit-like
LOC121416321	2.29e-12	-0.352953	0.119	0.311	4.06e-08	1	46_kDa_FK506-binding_nuclear_protein-like
LOC121422198	2.39e-12	-0.287431	0.116	0.31	4.23e-08	1	brain-specific_angiogenesis_inhibitor_1-associated_protein_2-like_protein_1
LOC121431622	2.63e-12	-0.542618	0.092	0.276	4.66e-08	1	uncharacterized_LOC121431622
LOC121415211	2.7e-12	-0.264253	0.157	0.376	4.78e-08	1	RNA_polymerase_II_elongation_factor_ELL-like
LOC121410373	2.77e-12	-0.562679	0.347	0.584	4.9e-08	1	CDC42_small_effector_protein_2-like
LOC121428660	3.04e-12	-0.369732	0.228	0.45	5.38e-08	1	uncharacterized_LOC121428660
LOC121410481	3.07e-12	-0.270269	0.285	0.522	5.44e-08	1	dolichyl-diphosphooligosaccharide--protein_glycosyltransferase_subunit_1-like
LOC121413602	3.18e-12	-0.376477	0.107	0.293	5.63e-08	1	AT-rich_interactive_domain-containing_protein_1B-like
LOC121430716	3.25e-12	-0.331472	0.19	0.402	5.76e-08	1	trifunctional_enzyme_subunit_alpha,_mitochondrial-like
LOC121422974	3.58e-12	-0.27167	0.338	0.587	6.34e-08	1	eukaryotic_peptide_chain_release_factor_GTP-binding_subunit_ERF3A-like
LOC121411145	4.31e-12	-0.310513	0.193	0.411	7.64e-08	1	H/ACA_ribonucleoprotein_complex_subunit_GAR1-like
LOC121408992	4.46e-12	-0.326902	0.092	0.271	7.9e-08	1	28S_ribosomal_protein_S23,_mitochondrial-like
LOC121413911	4.63e-12	0.686288	0.261	0.13	8.21e-08	1	synaptotagmin-like_protein_4
LOC121405738	4.95e-12	-0.371841	0.181	0.383	8.78e-08	1	staphylococcal_nuclease_domain-containing_protein_1-like
LOC121414443	4.96e-12	-0.356728	0.246	0.465	8.78e-08	1	iron-sulfur_cluster_assembly_scaffold_protein_IscU-like
LOC121430637	5.12e-12	-0.39148	0.211	0.432	9.07e-08	1	transcription_factor_SOX-4-like
LOC121422365	5.22e-12	-0.36276	0.217	0.435	9.25e-08	1	eukaryotic_translation_initiation_factor_3_subunit_B-like
LOC121431605	5.41e-12	0.808214	0.65	0.643	9.59e-08	1	gelsolin-like_protein_1
LOC121415834	5.45e-12	0.48427	0.303	0.15	9.66e-08	1	dual_oxidase_maturation_factor_1-like
LOC121409284	5.67e-12	0.488187	0.368	0.206	1.01e-07	1	myb-like_protein_X
LOC121410174	5.7e-12	-0.343666	0.306	0.544	1.01e-07	1	ceramide_synthase_1-like
LOC121420998	5.74e-12	-0.415418	0.377	0.611	1.02e-07	1	nucleosome_assembly_protein_1-like_1
LOC121405842	6.54e-12	-0.346763	0.217	0.431	1.16e-07	1	small_nuclear_ribonucleoprotein_E-like
LOC121428518	7.64e-12	-0.337242	0.573	0.806	1.35e-07	1	far_upstream_element-binding_protein_1-like
LOC121411130	7.66e-12	-0.302331	0.632	0.898	1.36e-07	1	cytochrome_c_oxidase_subunit_NDUFA4-like
LOC121431399	8.07e-12	-0.319815	0.282	0.516	1.43e-07	1	protein_extra-macrochaetae-like
LOC121409210	8.21e-12	-0.322438	0.11	0.294	1.45e-07	1	sigma_intracellular_receptor_2-like
LOC121410392	8.45e-12	-0.307113	0.083	0.261	1.5e-07	1	twitchin-like
LOC121424881	8.59e-12	-1.1643	0.139	0.332	1.52e-07	1	actin,_cytoskeletal
LOC121414006	8.9e-12	-0.356396	0.208	0.413	1.58e-07	1	prefoldin_subunit_3-like
LOC121409250	9.66e-12	-0.301779	0.285	0.523	1.71e-07	1	protein_NipSnap_homolog_2-like
LOC121410231	9.78e-12	-0.502438	0.187	0.392	1.73e-07	1	glutamyl_aminopeptidase-like
LOC121411083	1.07e-11	-0.274915	0.318	0.567	1.9e-07	1	SRSF_protein_kinase_3-like
LOC121427344	1.11e-11	-0.320965	0.125	0.308	1.96e-07	1	proteasome_subunit_beta_type-6-like
LOC121413485	1.13e-11	-0.3661	0.157	0.349	2e-07	1	nuclear_migration_protein_nudC-like
LOC121420405	1.14e-11	-0.402456	0.573	0.8	2.02e-07	1	ATP-dependent_RNA_helicase_cgh-1-like
LOC121422489	1.17e-11	0.920566	0.326	0.191	2.08e-07	1	katanin-interacting_protein-like
LOC121430776	1.27e-11	-0.263017	0.142	0.338	2.26e-07	1	serine/threonine-protein_kinase_Sgk1-like
LOC121414524	1.29e-11	1.06125	0.386	0.258	2.28e-07	1	tubulin_alpha-1_chain-like
LOC121410020	1.33e-11	0.883636	0.62	0.542	2.36e-07	1	S-adenosylmethionine_sensor_upstream_of_mTORC1-like
LOC121420063	1.48e-11	1.40592	0.463	0.34	2.63e-07	1	AAC-rich_mRNA_clone_AAC4_protein-like
LOC121422729	1.55e-11	-0.337673	0.694	0.907	2.74e-07	1	uncharacterized_LOC121422729
LOC121410342	2.16e-11	-0.304578	0.199	0.414	3.83e-07	1	coatomer_subunit_zeta-1-like
LOC121424824	2.19e-11	-0.27952	0.116	0.297	3.89e-07	1	T-complex_protein_1_subunit_eta-like
LOC121405827	2.21e-11	-0.558078	0.312	0.523	3.92e-07	1	G1/S-specific_cyclin-D1-like
LOC121411534	2.4e-11	-0.306445	0.516	0.775	4.25e-07	1	eukaryotic_translation_initiation_factor_5B-like
LOC121408489	2.55e-11	-0.311609	0.116	0.304	4.51e-07	1	coiled-coil-helix-coiled-coil-helix_domain-containing_protein_2-like
LOC121427111	2.63e-11	-0.346963	0.579	0.832	4.66e-07	1	clathrin_light_chain_A-like
LOC121428846	2.77e-11	-0.340805	0.258	0.466	4.9e-07	1	protein_catecholamines_up-like
LOC121409976	2.79e-11	-0.276765	0.22	0.431	4.95e-07	1	NADH_dehydrogenase_[ubiquinone]_1_alpha_subcomplex_subunit_8-like
LOC121430258	2.84e-11	-0.330728	0.715	0.903	5.04e-07	1	sodium/potassium-transporting_ATPase_subunit_beta-3-like
LOC121411830	2.89e-11	-0.339928	0.205	0.406	5.12e-07	1	proteasome_subunit_alpha_type-5-like
LOC121410173	2.91e-11	-0.359564	0.107	0.281	5.16e-07	1	26S_proteasome_complex_subunit_SEM1-like
LOC121411537	2.91e-11	-0.411114	0.101	0.276	5.16e-07	1	zinc_finger_E-box-binding_homeobox_2-like
LOC121410523	3.14e-11	-0.349511	0.579	0.818	5.57e-07	1	ubiquitin-conjugating_enzyme_E2_N-like
LOC121411826	3.3e-11	-0.306004	0.24	0.454	5.84e-07	1	mitochondrial_import_inner_membrane_translocase_subunit_Tim16-like
LOC121419374	3.51e-11	-0.273686	0.338	0.58	6.22e-07	1	histone_H3.3A
LOC121420217	4.8e-11	-0.340926	0.16	0.349	8.5e-07	1	ribosomal_RNA_processing_protein_1_homolog_A-like
gene-DR311-mgt22	5.71e-11	-0.426707	0.148	0.329	1.01e-06	1
LOC121418191	5.77e-11	-0.974506	0.095	0.262	1.02e-06	1	uncharacterized_LOC121418191
LOC121409141	5.85e-11	-0.324907	0.175	0.378	1.04e-06	1	alpha-N-acetylgalactosaminidase-like
LOC121419438	6.92e-11	-0.297924	0.217	0.418	1.23e-06	1	signal_recognition_particle_9_kDa_protein-like
LOC121408800	7.81e-11	-0.336362	0.113	0.287	1.38e-06	1	sodium-_and_chloride-dependent_glycine_transporter_1-like
LOC121409705	7.84e-11	0.644695	0.329	0.193	1.39e-06	1	peptide_methionine_sulfoxide_reductase-like
LOC121407324	8.29e-11	-0.347525	0.169	0.358	1.47e-06	1	small_nuclear_ribonucleoprotein_Sm_D1-like
LOC121429403	8.38e-11	1.43677	0.255	0.137	1.48e-06	1	uncharacterized_LOC121429403
LOC121431730	8.7e-11	-0.300173	0.184	0.376	1.54e-06	1	outer_mitochondrial_transmembrane_helix_translocase-like
LOC121421356	8.8e-11	-0.349716	0.169	0.352	1.56e-06	1	28S_ribosomal_protein_S14,_mitochondrial-like
LOC121408858	1.15e-10	-0.307762	0.142	0.324	2.03e-06	1	elongin-B-like
LOC121415804	1.25e-10	-0.320619	0.665	0.846	2.21e-06	1	40S_ribosomal_protein_S6-like
LOC121411380	1.31e-10	-0.322037	0.166	0.359	2.32e-06	1	uncharacterized_LOC121411380
LOC121418990	1.78e-10	-0.312011	0.522	0.761	3.15e-06	1	polyadenylate-binding_protein_4-like
LOC121423869	1.78e-10	-0.269831	0.344	0.569	3.15e-06	1	NADH_dehydrogenase_[ubiquinone]_1_beta_subcomplex_subunit_7-like
LOC121428770	1.87e-10	-0.275556	0.107	0.275	3.31e-06	1	collagen_alpha-1(I)_chain-like
LOC121407463	2.12e-10	0.907943	0.409	0.295	3.76e-06	1	uncharacterized_LOC121407463
LOC121422488	2.23e-10	-0.280873	0.193	0.386	3.95e-06	1	26S_proteasome_non-ATPase_regulatory_subunit_12-like
LOC121419455	2.42e-10	-0.343054	0.125	0.298	4.29e-06	1	uncharacterized_LOC121419455
LOC121418272	2.66e-10	-0.284652	0.11	0.275	4.71e-06	1	enhancer_of_rudimentary_homolog
LOC121408879	2.75e-10	-0.29698	0.169	0.355	4.87e-06	1	UPF0390_protein_UM03986-like
LOC121408568	2.94e-10	-0.343657	0.104	0.266	5.21e-06	1	FACT_complex_subunit_SSRP1-like
LOC121431565	2.95e-10	-0.313157	0.128	0.299	5.24e-06	1	nucleolar_protein_dao-5-like
LOC121418566	3.16e-10	0.737319	0.605	0.604	5.59e-06	1	uncharacterized_LOC121418566
LOC121410780	3.21e-10	-0.31401	0.288	0.501	5.69e-06	1	MKI67_FHA_domain-interacting_nucleolar_phosphoprotein-like
LOC121406698	3.5e-10	-0.252686	0.214	0.409	6.21e-06	1	la-related_protein_1-like
LOC121428620	4.03e-10	-0.276302	0.359	0.593	7.14e-06	1	ATP-binding_cassette_sub-family_F_member_1-like
LOC121425655	4.37e-10	-0.295072	0.178	0.359	7.75e-06	1	eukaryotic_translation_initiation_factor_3_subunit_A-like
LOC121411173	4.7e-10	-0.280423	0.125	0.295	8.32e-06	1	heat_shock_cognate_71_kDa_protein-like
LOC121423785	6e-10	-0.425996	0.122	0.285	1.06e-05	1	Krueppel-like_factor_6
LOC121414331	6.03e-10	-0.289728	0.184	0.366	1.07e-05	1	peroxiredoxin-4-like
LOC121411271	6.07e-10	-0.2871	0.205	0.398	1.08e-05	1	isocitrate_dehydrogenase_[NADP],_mitochondrial-like
LOC121413594	6.15e-10	-0.252319	0.148	0.321	1.09e-05	1	histone-binding_protein_RBBP4
LOC121425882	6.25e-10	-0.374253	0.24	0.434	1.11e-05	1	60_kDa_heat_shock_protein,_mitochondrial-like
LOC121423946	6.82e-10	-0.274791	0.113	0.277	1.21e-05	1	cysteine/serine-rich_nuclear_protein_1-like
LOC121424827	7.16e-10	-0.336406	0.128	0.289	1.27e-05	1	signal_recognition_particle_subunit_SRP72-like
LOC121423109	7.34e-10	-0.315266	0.249	0.443	1.3e-05	1	NADH_dehydrogenase_[ubiquinone]_1_beta_subcomplex_subunit_10-like
LOC121426081	7.35e-10	-0.272567	0.101	0.26	1.3e-05	1	proteasome_activator_complex_subunit_3-like
LOC121430572	7.49e-10	-0.258531	0.181	0.373	1.33e-05	1	eukaryotic_translation_initiation_factor_3_subunit_H-B-like
LOC121408870	7.76e-10	-0.280206	0.178	0.362	1.37e-05	1	DNA_ligase_1-like
LOC121411075	8.3e-10	-0.365673	0.252	0.447	1.47e-05	1	mitochondrial_10-formyltetrahydrofolate_dehydrogenase-like
LOC121416016	9.84e-10	-0.287402	0.11	0.269	1.74e-05	1	RNA-binding_protein_8A-like
LOC121419347	1.14e-09	-0.324425	0.315	0.537	2.02e-05	1	V-type_proton_ATPase_subunit_D-like
LOC121408340	1.16e-09	0.858479	0.792	0.781	2.05e-05	1	CCAAT/enhancer-binding_protein_alpha-like
LOC121425187	1.22e-09	-0.636462	0.19	0.347	2.16e-05	1	insulin-like_growth_factor-binding_protein_7
LOC121407840	1.24e-09	-0.443515	0.273	0.467	2.2e-05	1	ribonucleoside-diphosphate_reductase_large_subunit-like
LOC121416067	1.43e-09	-0.280875	0.196	0.38	2.53e-05	1	ubiquitin-associated_protein_2-like
LOC121428489	1.54e-09	0.981277	0.552	0.493	2.73e-05	1	nuclear_receptor_subfamily_5_group_A_member_2-like
LOC121405836	1.65e-09	0.915779	0.285	0.164	2.93e-05	1	uncharacterized_LOC121405836
LOC121423093	1.88e-09	-0.473876	0.122	0.278	3.33e-05	1	DNA_ligase_1-like
LOC121410453	1.88e-09	-0.30223	0.249	0.44	3.33e-05	1	guanine_nucleotide-binding_protein-like_NSN1
LOC121418682	2.07e-09	0.473644	0.546	0.431	3.66e-05	1	monocarboxylate_transporter_13-like
LOC121410589	2.09e-09	-0.380473	0.154	0.321	3.7e-05	1	ETS_domain-containing_protein_Elk-3-like
LOC121424768	2.32e-09	-0.276634	0.166	0.344	4.12e-05	1	transmembrane_emp24_domain-containing_protein_4-like
LOC121416874	2.38e-09	-0.347772	0.166	0.332	4.22e-05	1	sodium/myo-inositol_cotransporter_2-like
LOC446166	2.5e-09	-0.57333	0.49	0.68	4.42e-05	1	embryonic_blastocoelar_extracellular_matrix_protein_precursor
LOC121422531	2.52e-09	-0.279095	0.142	0.305	4.46e-05	1	eukaryotic_translation_initiation_factor_3_subunit_D-like
LOC121418665	2.66e-09	-0.30368	0.16	0.329	4.7e-05	1	actin_cytoskeleton-regulatory_complex_protein_pan1-like
LOC121408312	2.89e-09	-0.283281	0.154	0.325	5.13e-05	1	39S_ribosomal_protein_L3,_mitochondrial-like
LOC121418654	3.07e-09	-0.333561	0.128	0.286	5.44e-05	1	serum_response_factor-like
LOC121429903	3.08e-09	-0.325834	0.16	0.332	5.46e-05	1	uncharacterized_protein_DDB_G0285291-like
LOC121417323	3.26e-09	-0.251004	0.276	0.477	5.78e-05	1	PIN2/TERF1-interacting_telomerase_inhibitor_1-like
LOC121418977	3.36e-09	0.876977	0.445	0.35	5.95e-05	1	mitogen-activated_protein_kinase-binding_protein_1-like
LOC121414150	3.5e-09	-0.261322	0.469	0.683	6.2e-05	1	eukaryotic_translation_initiation_factor_1A,_Y-chromosomal-like
LOC121413886	3.59e-09	-0.341737	0.16	0.322	6.36e-05	1	heterogeneous_nuclear_ribonucleoprotein_R-like
LOC121431717	3.76e-09	-0.318348	0.172	0.344	6.67e-05	1	zinc_finger_SWIM_domain-containing_protein_8-like
LOC121414351	3.8e-09	-0.32436	0.196	0.371	6.73e-05	1	leucine--tRNA_ligase,_cytoplasmic-like
LOC121423610	3.84e-09	0.4204	0.27	0.146	6.81e-05	1	lateral_signaling_target_protein_2_homolog
LOC121410004	3.89e-09	-0.274003	0.685	0.887	6.89e-05	1	ras-related_protein_Rap-1b-like
LOC121413724	4.73e-09	-0.262094	0.119	0.274	8.38e-05	1	eukaryotic_translation_initiation_factor_1A,_Y-chromosomal-like
LOC121411841	4.81e-09	0.83544	0.264	0.151	8.53e-05	1	E3_ubiquitin-protein_ligase_PDZRN3-B-like
LOC121410303	5.01e-09	-0.256265	0.181	0.352	8.87e-05	1	short_coiled-coil_protein_B-like
LOC121418830	5.17e-09	-0.284584	0.196	0.379	9.15e-05	1	26S_proteasome_regulatory_subunit_4
LOC121422876	5.45e-09	-0.745102	0.193	0.355	9.65e-05	1	uncharacterized_LOC121422876
LOC121431604	5.53e-09	0.844161	0.466	0.349	9.8e-05	1	steroid_17-alpha-hydroxylase/17,20_lyase-like
LOC121405662	6.21e-09	-0.305381	0.226	0.41	0.000110101	1	lysosomal_acid_phosphatase-like
LOC121408338	6.62e-09	-0.283756	0.205	0.391	0.000117259	1	uncharacterized_LOC121408338
LOC121421396	7.39e-09	-0.271716	0.128	0.287	0.000131021	1	low-density_lipoprotein_receptor-related_protein_6-like
LOC121410221	7.99e-09	-0.334954	0.226	0.406	0.000141533	1	V-type_proton_ATPase_subunit_S1-like
LOC121432057	8.11e-09	0.675501	0.332	0.214	0.000143733	1	monocarboxylate_transporter_13-like
LOC121422371	8.94e-09	-0.268707	0.122	0.275	0.000158393	1	alpha-N-acetyl-neuraminyl-2,3-beta-galactosyl-1,3-N-acetyl-galactosaminide_alpha-2,6-sialyltransferase-like
LOC121410554	1.63e-08	-0.260195	0.116	0.26	0.000288778	1	cold_shock_domain-containing_protein_E1-like
LOC121408623	1.79e-08	-0.255861	0.19	0.358	0.000317685	1	AP-1_complex_subunit_beta-1-like
LOC121422632	1.91e-08	-0.286951	0.151	0.306	0.000338457	1	nucleolar_protein_12-like
LOC121423647	2.15e-08	0.664178	0.783	0.75	0.00038018	1	transcription_factor_AP-1-like
LOC121422410	2.17e-08	-0.286189	0.712	0.919	0.000385354	1	actin-related_protein_2/3_complex_subunit_1A-like
LOC121408817	2.57e-08	-0.324021	0.169	0.326	0.000454492	1	macrophage_migration_inhibitory_factor-like
LOC121417195	2.8e-08	-0.297129	0.19	0.352	0.000496077	1	dihydropyrimidinase-like
LOC121419249	3.07e-08	-0.25567	0.125	0.27	0.000544682	1	malate_dehydrogenase,_cytoplasmic-like
LOC121414602	3.19e-08	1.03002	0.279	0.175	0.000565634	1	tumor_necrosis_factor_receptor_superfamily_member_16-like
LOC121423760	3.29e-08	-0.285297	0.715	0.914	0.000583625	1	40S_ribosomal_protein_S13-like
LOC121419549	3.41e-08	0.446954	0.662	0.539	0.000603648	1	60S_ribosomal_protein_L30-like
LOC121405581	3.46e-08	-0.294375	0.154	0.308	0.000612296	1	bone_morphogenetic_protein_1_homolog
LOC121411556	3.61e-08	0.982024	0.68	0.639	0.000639086	1	thyrotroph_embryonic_factor-like
LOC121416285	3.62e-08	-0.275473	0.19	0.357	0.000641652	1	threonine--tRNA_ligase_1,_cytoplasmic-like
LOC121429222	3.96e-08	1.3948	0.513	0.429	0.000701108	1	uncharacterized_LOC121429222
LOC121408350	5.21e-08	0.862587	0.273	0.171	0.000923279	1	unconventional_myosin-XVIIIa-like
LOC121408173	5.35e-08	0.857593	0.629	0.533	0.000947285	1	nucleoredoxin-like
LOC121420114	5.8e-08	0.633906	0.374	0.26	0.00102815	1	amyloid-like_protein_1
[truncated: 7,474 more rows]

## Sheet: Lv_15FBS_Marker Gene Expression
Table S6 – Single-cell RNA sequencing of L. variegatus embryonic cells cultured in UM with 15% FBS - Marker gene expression (average expression of each gene in each cluster)
[truncated: 493 more rows]

[truncated: 1 more sheets: Lv_15FBS_Diff_Expression]
