# Supplementary material for: Genetically tractable embryonic cell lines from sea urchins
Source: Research Square preprint supplement (doi:10.21203/rs.3.rs-5665288/v1), 2025-01-15
Supplement: Supplementary file 3 [file 603d45d3080209ce0a269210.xlsx]

## Sheet: 3%FBS
Table S4 – Growth and viability of L. variegatus embryonic cells - cultured in Urchin Media with 3% FBS
Date	Experiment Day	Media	Cell state	Cell Counts (hemocytometer)				Average cell counts	Cells/ml	Number cells seeded	Total cells	Viability % live cells	% Red cells	Pop doubling	Cumulative population doubling
				Ch1	Ch2	Ch3	Ch4
Lv Blastula Cell Culture in Urchin Media (UM) with 3% FBS
June 4 2021	3	3% FBS R3	Live	56	52	70	73	62.75	1255000	1290000	6275000	98.0469	0	2.28092	2.28
			Dead	2	0	2	1	1.25
			Red	0	0	0	0	0
June 8 2021	7	3% FBS R3	Live	63	56	60	71	62.5	1250000	3000000	6250000	98.8142	0.4	1.05828	3.33828
			Dead	1	1	0	1	0.75
			Red	0	0	1	0	0.25
June 11 2021	10	3% FBS R3	Live	28	28	33	45	33.5	670000	3000000	3350000	99.2593	0	0.159106	3.49739
			Dead	0	0	0	1	0.25
			Red	0	0	0	0	0
June 15 2021	14	3% FBS R3	Live	35	29	31	29	31	620000	3000000	3100000	96.875	0	0.0472783	3.54466
			Dead	0	1	2	1	1
			Red	0	0	0	0	0
June 22 2021	21	3% FBS R3	Live	43	37	39	37	39	780000	3000000	3900000	73.5849	0	0.378292	3.92296
			Dead	13	19	11	13	14
			Red	0	0	0	0	0
June 29 2021	28	3% FBS R3	Live	39	37	42	44	40.5	810000	3000000	4050000	84.375	0	0.432708	4.35566
			Dead	8	5	8	9	7.5
			Red	0	0	0	0	0
July 6 2021	35	3% FBS R3	Live	55	51	46	53	51.25	1025000	3000000	5125000	87.6068	1.46341	0.772141	5.1278
			Dead	8	10	8	3	7.25
			Red	0	1	1	1	0.75
July 13 2021	42	3% FBS R3	Live	29	29	34	27	29.75	595000	3000000	2975000	74.8428	1.68067	-0.0120658	5.1278
			Dead	6	12	15	7	10
			Red	0	0	1	1	0.5
July 20 2021	49	3% FBS R3	Live	37	39	23	32	32.75	655000	2975000	3275000	87.3333	1.52672	0.138525	5.26633
			Dead	6	4	3	6	4.75
			Red	0	1	0	1	0.5
July 27 2021	56	3% FBS R3	Live	26	20	20	27	23.25	465000	3000000	2325000	68.3824	4.30108	-0.367518	5.26633
			Dead	4	16	12	11	10.75
			Red	1	2	0	1	1
Aug 3 2021	63	3% FBS R3	Live	34	27	27	24	28	560000	2325000	2800000	56.2814	8.03571	0.26804	5.53437
			Dead	25	21	24	17	21.75
			Red	1	1	2	5	2.25
Aug 10 2021	70	3% FBS R3	Live	25	32	27	26	27.5	550000	2800000	2750000	68.75	4.54545	-0.0259801	5.53437
			Dead	15	6	14	15	12.5
			Red	0	3	1	1	1.25
Aug 17 2021	77	3% FBS R3	Live	45	37	41	40	40.75	815000	2750000	4075000	74.0909	11.6564	0.567039	6.10141
			Dead	8	18	14	17	14.25
			Red	5	4	7	3	4.75
Aug 26 2021	86	3% FBS R3	Live	46	42	33	30	37.75	755000	3000000	3775000	72.5962	1.98675	0.331322	6.43273
			Dead	15	13	17	12	14.25
			Red	0	1	2	0	0.75
Sept 7 2021	98	3% FBS R3	Live	30	27	19	20	24	480000	3000000	2400000	59.6273	21.875	-0.321741	6.43273
			Dead	14	18	13	20	16.25
			Red	2	7	6	6	5.25
Sept 14 2021	105	3% FBS R3	Live	30	37	29	33	32.25	645000	2400000	3225000	55.8442	13.1783	0.426017	6.85875
			Dead	28	23	27	24	25.5
			Red	0	3	7	7	4.25
Sept 21 2021	112	3% FBS R3	Live	51	37	41	47	44	880000	3000000	4400000	67.6923	11.3636	0.55222	7.41097
			Dead	20	22	19	23	21
			Red	3	7	7	3	5
Sept 28 2021	119	3% FBS R3	Live	34	31	42	34	35.25	705000	3000000	3525000	52.809	9.92908	0.232526	7.64349
			Dead	43	30	29	24	31.5
			Red	4	3	3	4	3.5
Oct 5 2021	126	3% FBS R3	Live	53	44	58	35	47.5	950000	3000000	4750000	67.8571	17.8947	0.66258	8.30607
			Dead	27	20	19	24	22.5
			Red	9	8	9	8	8.5
Oct 12 2021	133	3% FBS R3	Live	33	30	22	40	31.25	625000	3000000	3125000	64.7668	14.4	0.0588595	8.36493
			Dead	20	18	14	16	17
			Red	5	5	3	5	4.5
Oct 19 2021	140	3% FBS R3	Live	31	37	31	28	31.75	635000	3000000	3175000	65.1282	22.8346	0.0817466	8.44668
			Dead	18	16	13	21	17
			Red	8	8	6	7	7.25
Oct 26 2021	147	3% FBS R3	Live	23	27	23	18	22.75	455000	3000000	2275000	58.3333	18.6813	-0.398864	8.44668
			Dead	17	16	14	18	16.25
			Red	6	5	3	3	4.25
Nov 2 2021	154	3% FBS R3	Live	27	24	22	33	26.5	530000	2275000	2650000	69.7368	13.2075	0.219998	8.66668
			Dead	9	10	16	11	11.5
			Red	1	3	1	9	3.5
Nov 9 2021	161	3% FBS R3	Live	27	24	25	24	25	500000	2650000	2500000	66.6667	27	-0.0840155	8.66668
			Dead	14	15	12	9	12.5
			Red	7	5	7	8	6.75
Nov 17 2021	169	3% FBS R3	Live	34	31	31	36	33	660000	2500000	3300000	74.1573	20.4545	0.400305	9.06698
			Dead	8	15	13	10	11.5
			Red	5	9	7	6	6.75
Nov 23 2021	175	3% FBS R3	Live	21	33	30	28	28	560000	3000000	2800000	68.7117	19.6429	-0.0994779	9.06698
			Dead	15	15	7	14	12.75
			Red	5	6	8	3	5.5
Nov 30 2021	182	3% FBS R3	Live	46	40	41	28	38.75	775000	2800000	3875000	84.6995	21.2903	0.468497	9.53548
			Dead	6	7	6	9	7
			Red	11	9	9	4	8.25
Dec 7 2021	189	3% FBS R3	Live	45	38	44	48	43.75	875000	3000000	4375000	90.6736	17.7143	0.544005	10.0795
			Dead	3	4	6	5	4.5
			Red	13	7	5	6	7.75
Dec 14 2021	196	3% FBS R3	Live	41	32	35	30	34.5	690000	3000000	3450000	92.6174	14.4928	0.201517	10.281
			Dead	2	3	2	4	2.75
			Red	9	6	1	4	5
Dec 21 2021	203	3% FBS R3	Live	29	23	21	23	24	480000	3000000	2400000	92.3077	6.25	-0.321741	10.281
			Dead	1	1	2	4	2
			Red	1	2	1	2	1.5
Dec 28 2021	210	3% FBS R3	Live	31	34	34	27	31.5	630000	2400000	3150000	91.9708	11.9048	0.39209	10.6731
			Dead	2	3	4	2	2.75
			Red	7	3	4	1	3.75
Jan 3 2022	216	3% FBS R3	Live	56	67	77	68	67	1340000	3000000	6700000	93.7063	5.59701	1.15853	11.8316
			Dead	5	4	5	4	4.5
			Red	3	7	1	4	3.75
Jan 10 2022	223	3% FBS R3	Live	56	66	77	60	64.75	1295000	3000000	6475000	93.1655	1.5444	1.10927	12.9409
			Dead	2	6	9	2	4.75
			Red	0	1	0	3	1
Jan 18 2022	230	3% FBS R3	Live	100	85	84	88	89.25	1785000	3000000	8925000	98.892	0.840336	1.57198	14.5129
			Dead	1	0	2	1	1
			Red	0	1	0	2	0.75
Jan 24 2022	236	3% FBS R3	Live	109	91	97	88	96.25	1925000	3000000	9625000	98.4655	2.07792	1.68085	16.1937
			Dead	1	0	3	2	1.5
			Red	2	4	1	1	2
Feb 1 2022	243	3% FBS R3	Live	196	223	243	207	217.25	4345000	3000000	21725000	99.4279	1.03567	2.85466	19.0484
			Dead	2	1	2	0	1.25
			Red	2	3	2	2	2.25
Feb 7 2022	250	3% FBS R3	Live	175	167	165	164	167.75	3355000	3000000	16775000	99.2604	2.68256	2.48184	21.5302
			Dead	1	0	1	3	1.25
			Red	4	7	4	3	4.5
2022-02-14	257	3% FBS R3	Live	89	102	91	102	96	1920000	3000000	9600000	100	8.59375	1.6771	23.2073
			Dead	0	0	0	0	0
			Red	11	10	4	8	8.25
2022-02-22	264	3% FBS R3	Live	63	81	61	68	68.25	1365000	3000000	6825000	90.3974	1.8315	1.18518	24.3925
			Dead	3	11	9	6	7.25
			Red	2	2	0	1	1.25
2022-02-28	270	3% FBS R3	Live	22	38	34	44	34.5	690000	3000000	3450000	96.5035	2.17391	0.201517	24.594
			Dead	1	0	1	3	1.25
			Red	1	0	2	0	0.75
2022-03-07	277	3% FBS R3	Live	32	38	32	41	35.75	715000	3000000	3575000	97.2789	2.0979	0.252834	24.8468
			Dead	1	1	0	2	1
			Red	0	1	2	0	0.75
2022-03-14	284	3% FBS R3	Live	45	45	54	49	48.25	965000	3000000	4825000	98.4694	1.03627	0.685169	25.532
			Dead	1	1	0	1	0.75
			Red	0	1	0	1	0.5
2022-03-21	291	3% FBS R3	Live	43	39	31	64	44.25	885000	3000000	4425000	99.4382	0.564972	0.56039	26.0924
			Dead	1	0	0	0	0.25
			Red	0	0	1	0	0.25
2022-03-29	299	3% FBS R3	Live	48	40	30	37	38.75	775000	3000000	3875000	95.092	0.645161	0.36902	26.4614
			Dead	0	6	2	0	2
			Red	0	0	0	1	0.25
2022-04-02	306	3% FBS R3	Live	34	21	21	34	27.5	550000	3000000	2750000	95.6522	0	-0.125458	26.4614
			Dead	1	2	2	0	1.25
			Red	0	0	0	0	0
2022-04-11	313	3% FBS R3	Live	32	45	32	44	38.25	765000	2750000	3825000	100	0.653595	0.475752	26.9372
			Dead	0	0	0	0	0
			Red	1	0	0	0	0.25
2022-04-18	320	3% FBS R3	Live	51	62	52	69	58.5	1170000	3000000	5850000	99.5745	0	0.962915	27.9001
			Dead	0	1	0	0	0.25
			Red	0	0	0	0	0
2022-04-25	327	3% FBS R3	Live	62	66	59	66	63.25	1265000	3000000	6325000	97.3077	0	1.07548	28.9756
			Dead	3	1	2	1	1.75
			Red	0	0	0	0	0
2022-05-02	334	3% FBS R3	Live	82	66	80	88	79	1580000	3000000	7900000	98.75	0	1.39608	30.3716
			Dead	2	0	1	1	1
			Red	0	0	0	0	0
2022-05-11	343	3% FBS R3	Live	230	225	237	253	236.25	4725000	3000000	23625000	98.8494	0	2.97555	33.3472
			Dead	2	1	8	0	2.75
			Red	0	0	0	0	0
2022-05-16	348	3% FBS R3	Live	46	74	70	70	65	1300000	3000000	6500000	99.6169	0	1.11483	34.462
			Dead	0	1	0	0	0.25
			Red	0	0	0	0	0
2022-05-23	355	3% FBS R3	Live	162	156	165	186	167.25	3345000	3000000	16725000	99.5536	0.149477	2.47753	36.9396
			Dead	0	3	0	0	0.75
			Red	0	0	1	0	0.25
2022-05-31	363	3% FBS R3	Live	190	184	200	190	191	3820000	3000000	19100000	99.0921	0	2.66899	39.6085
			Dead	2	1	3	1	1.75
			Red	0	0	0	0	0
2022-06-06	369	3% FBS R3	Live	36	38	40	35	37.25	745000	3000000	3725000	100	0.671141	0.312097	39.9206
			Dead	0	0	0	0	0
			Red	0	0	1	0	0.25
2022-06-13	376	3% FBS R3	Live	234	258	258	235	246.25	4925000	3000000	24625000	99.4949	0	3.03533	42.956
			Dead	0	2	3	0	1.25
			Red	0	0	0	0	0
2022-06-20	383	3% FBS R3	Live	30	40	29	42	35.25	705000	3000000	3525000	99.2958	0	0.232526	43.1885
			Dead	0	0	1	0	0.25
			Red	0	0	0	0	0
2022-06-28	390	3% FBS R3	Live	88	86	91	82	86.75	1735000	3000000	8675000	99.7126	0	1.53101	44.7195
			Dead	1	0	0	0	0.25
			Red	0	0	0	0	0
2022-07-05	398	3% FBS R3	Live	277	307	404	394	345.5	6910000	3000000	34550000	99.5677	0	3.5236	48.2431
			Dead	1	3	2	0	1.5
			Red	0	0	0	0	0
2022-07-11	404	3% FBS R3	Live	52	28	29	162	67.75	1355000	3000000	6775000	90.9396	0	1.17458	49.4177
			Dead	0	0	0	27	6.75
			Red	0	0	0	0	0
2022-07-18	411	3% FBS R3	Live	229	267	314	260	267.5	5350000	3000000	26750000	99.5349	0.0934579	3.15467	52.5724
			Dead	2	0	2	1	1.25
			Red	0	0	1	0	0.25
2022-07-26	418	3% FBS R3	Live	42	32	48	51	43.25	865000	3000000	4325000	99.4253	0	0.527431	53.0998
			Dead	1	0	0	0	0.25
			Red	0	0	0	0	0
2022-08-02	425	3% FBS R3	Live	70	60	82	82	73.5	1470000	3000000	7350000	99.661	0.340136	1.29203	54.3918
			Dead	0	0	1	0	0.25
			Red	0	0	0	1	0.25
2022-08-09	432	3% FBS R3	Live	228	255	423	314	305	6100000	3000000	30500000	99.3485	0	3.34383	57.7357
			Dead	0	3	4	1	2
			Red	0	0	0	0	0
2022-08-16	439	3% FBS R3	Live	31	27	51	26	33.75	675000	3000000	3375000	100	0	0.169826	57.9055
			Dead	0	0	0	0	0
			Red	0	0	0	0	0
2022-08-22	445	3% FBS R3	Live	54	36	59	46	48.75	975000	3000000	4875000	99.4898	0.512821	0.700033	58.6055
			Dead	0	0	0	1	0.25
			Red	1	0	0	0	0.25
2022-08-29	452	3% FBS R3	Live	50	35	42	37	41	820000	3000000	4100000	99.3939	0	0.4504	59.0559
			Dead	0	1	0	0	0.25
			Red	0	0	0	0	0
2022-09-06	460	3% FBS R3	Live	41	34	49	23	36.75	735000	3000000	3675000	97.351	0	0.292612	59.3485
			Dead	1	2	0	1	1
			Red	0	0	0	0	0
2022-09-12	466	3% FBS R3	Live	97	80	98	117	98	1960000	3000000	9800000	97.5124	0	1.70683	61.0554
			Dead	1	2	3	4	2.5
			Red	0	0	0	0	0
2022-09-19	473	3% FBS R3	Live	53	45	76	58	58	1160000	3000000	5800000	98.3051	0	0.950538	62.0059
			Dead	0	3	0	1	1
			Red	0	0	0	0	0
2022-09-26	480	3% FBS R3	Live	57	63	49	50	54.75	1095000	3000000	5475000	98.6486	0	0.867393	62.8733
			Dead	0	3	0	0	0.75
			Red	0	0	0	0	0
2022-10-03	487	3% FBS R3	Live	43	35	37	48	40.75	815000	3000000	4075000	99.3902	0	0.441581	63.3149
			Dead	0	0	1	0	0.25
			Red	0	0	0	0	0
2022-10-10	494	3% FBS R3	Live	43	59	38	42	45.5	910000	3000000	4550000	97.3262	0	0.600555	63.9154
			Dead	1	1	2	1	1.25
			Red	0	0	0	0	0
2022-10-17	501	3% FBS R3	Live	64	73	79	67	70.75	1415000	3000000	7075000	96.2585	0	1.23705	65.1525
			Dead	3	2	5	1	2.75
			Red	0	0	0	0	0
2022-10-24	508	3% FBS R3	Live	158	156	155	185	163.5	3270000	3000000	16350000	99.6951	0	2.44484	67.5973
			Dead	1	0	1	0	0.5
			Red	0	0	0	0	0
2022-10-31	515	3% FBS R3	Live	64	70	84	75	73.25	1465000	3000000	7325000	97.6667	0	1.28712	68.8844
			Dead	1	1	2	3	1.75
			Red	0	0	0	0	0
2022-11-07	522	3% FBS R3	Live	44	33	43	49	42.25	845000	3000000	4225000	99.4118	0	0.493702	69.3781
			Dead	0	1	0	0	0.25
			Red	0	0	0	0	0
2022-11-14	529	3% FBS R3	Live	24	34	36	32	31.5	630000	3000000	3150000	96.9231	0	0.0703485	69.4485
			Dead	0	2	1	1	1
			Red	0	0	0	0	0
2022-11-21	536	3% FBS R3	Live	74	64	65	64	66.75	1335000	3000000	6675000	98.1618	0	1.15314	70.6016
			Dead	0	0	2	3	1.25
			Red	0	0	0	0	0
2022-11-28	543	3% FBS R3	Live	87	127	103	102	104.75	2095000	3000000	10475000	98.8208	0	1.80287	72.4045
			Dead	1	1	3	0	1.25
			Red	0	0	0	0	0
2022-12-05	550	3% FBS R3	Live	124	110	127	164	131.25	2625000	3000000	13125000	99.2439	0.190476	2.12805	74.5325
			Dead	2	0	1	1	1
			Red	1	0	0	0	0.25
2022-12-12	557	3% FBS R3	Live	105	104	97	100	101.5	2030000	3000000	10150000	99.5098	0	1.75742	76.29
			Dead	0	0	1	1	0.5
			Red	0	0	0	0	0
2022-12-19	564	3% FBS R3	Live	20	20	17	17	18.5	370000	3000000	1850000	100	0	-0.697032	76.29
			Dead	0	0	0	0	0
			Red	0	0	0	0	0
2022-12-27	572	3% FBS R3	Live	30	36	48	40	38.5	770000	1850000	3850000	95.6522	0	1.05672	77.3467
			Dead	2	2	2	1	1.75
			Red	0	0	0	0	0
2023-01-03	578	3% FBS R3	Live	52	84	73	63	68	1360000	3000000	6800000	98.5507	0	1.17989	78.5266
			Dead	1	3	0	0	1
			Red	0	0	0	0	0
2023-01-09	584	3% FBS R3	Live	89	87	82	99	89.25	1785000	3000000	8925000	96.748	0	1.57198	80.0985
			Dead	1	3	2	6	3
			Red	0	0	0	0	0
2023-01-17	592	3% FBS R3	Live	265	288	260	244	264.25	5285000	3000000	26425000	95.9165	0	3.13705	83.2356
			Dead	9	16	4	16	11.25
			Red	0	0	0	0	0
2023-01-23	598	3% FBS R3	Live	94	95	107	129	106.25	2125000	3000000	10625000	97.032	0.235294	1.82337	85.059
			Dead	2	0	3	8	3.25
			Red	0	0	1	0	0.25
2023-01-31	606	3% FBS R3	Live	50	61	76	54	60.25	1205000	3000000	6025000	97.9675	0	1.00541	86.0644
			Dead	0	0	3	2	1.25
			Red	0	0	0	0	0
2023-02-06	612	3% FBS R3	Live	34	37	40	29	35	700000	3000000	3500000	100	0	0.222263	86.2866
			Dead	0	0	0	0	0
			Red	0	0	0	0	0
2023-02-13	619	3% FBS R3	Live	42	50	52	40	46	920000	3000000	4600000	97.8723	0	0.616313	86.9029
			Dead	0	2	1	1	1
			Red	0	0	0	0	0
2023-02-20	626	3% FBS R3	Live	33	35	38	28	33.5	670000	3000000	3350000	97.8102	0	0.159106	87.0621
			Dead	0	1	1	1	0.75
			Red	0	0	0	0	0
2023-02-27	633	3% FBS R3	Live	29	29	25	28	27.75	555000	3000000	2775000	95.6897	0	-0.112409	87.0621
			Dead	0	0	2	3	1.25
			Red	0	0	0	0	0
2023-03-06	640	3% FBS R3	Live	89	95	91	108	95.75	1915000	2775000	9575000	98.9664	0	1.78575	88.8478
			Dead	0	1	1	2	1
			Red	0	0	0	0	0
2023-03-13	647	3% FBS R3	Live	29	32	32	25	29.5	590000	3000000	2950000	96.7213	0	-0.0242335	88.8478
			Dead	1	1	1	1	1
			Red	0	0	0	0	0
2023-03-20	654	3% FBS R3	Live	27	36	19	28	27.5	550000	2950000	2750000	99.0991	0	-0.101225	88.8478
			Dead	0	0	0	1	0.25
			Red	0	0	0	0	0
2023-03-27	661	3% FBS R3	Live	33	26	33	21	28.25	565000	2750000	2825000	93.3884	0	0.0387967	88.8866
			Dead	1	2	3	2	2
			Red	0	0	0	0	0
2023-04-03	668	3% FBS R3	Live	37	32	32	25	31.5	630000	2825000	3150000	94.0299	0	0.15701	89.0436
			Dead	3	2	2	1	2
			Red	0	0	0	0	0
2023-04-10	675	3% FBS R3	Live	46	39	39	34	39.5	790000	3000000	3950000	100	0	0.39666	89.4403
			Dead	0	0	0	0	0
			Red	0	0	0	0	0
2023-04-17	682	3% FBS R3	Live	34	31	26	23	28.5	570000	3000000	2850000	98.2759	0	-0.0739576	89.4403
			Dead	0	1	1	0	0.5
			Red	0	0	0	0	0
2023-04-24	689	3% FBS R3	Live	35	31	38	36	35	700000	2850000	3500000	100	0	0.296221	89.7365
			Dead	0	0	0	0	0
			Red	0	0	0	0	0
2023-05-01	696	3% FBS R3	Live	32	39	23	21	28.75	575000	3000000	2875000	95.8333	0	-0.0613649	89.7365
			Dead	1	0	3	1	1.25
			Red	0	0	0	0	0
2023-05-08	703	3% FBS R3	Live	32	48	43	30	38.25	765000	2875000	3825000	97.4522	0	0.411659	90.1481
			Dead	2	1	1	0	1
			Red	0	0	0	0	0
2023-05-15	710	3% FBS R3	Live	86	105	78	79	87	1740000	3000000	8700000	95.8678	0	1.53516	91.6833
			Dead	3	5	3	4	3.75
			Red	0	0	0	0	0
2023-05-22	717	3% FBS R3	Live	19	20	24	26	22.25	445000	3000000	2225000	98.8889	0	-0.430907	91.6833
			Dead	0	0	0	1	0.25
			Red	0	0	0	0	0
2023-05-29	724	3% FBS R3	Live	12	9	15	19	13.75	275000	2225000	1375000	100	0	-0.693971	91.6833
			Dead	0	0	0	0	0
			Red	0	0	0	0	0
2023-06-05	731	3% FBS R3	Live	141	125	119	110	123.75	2475000	1375000	12375000	98.2143	0	3.16809	94.8514
			Dead	3	2	1	3	2.25
			Red	0	0	0	0	0
2023-06-12	738	3% FBS R3	Live	64	83	85	63	73.75	1475000	3000000	7375000	98.9933	0	1.29693	96.1483
			Dead	0	2	0	1	0.75
			Red	0	0	0	0	0
2023-06-19	745	3% FBS R3	Live	30	35	41	32	34.5	690000	3000000	3450000	98.5714	0	0.201517	96.3498
			Dead	0	2	0	0	0.5
			Red	0	0	0	0	0
2023-06-26	752	3% FBS R3	Live	29	36	36	29	32.5	650000	3000000	3250000	99.2366	0	0.11541	96.4652
			Dead	0	1	0	0	0.25
			Red	0	0	0	0	0
2023-07-05	761	3% FBS R3	Live	32	30	36	30	32	640000	3000000	3200000	98.4615	0	0.0930554	96.5583
			Dead	0	1	1	0	0.5
			Red	0	0	0	0	0
2023-07-10	766	3% FBS R3	Live	48	38	48	41	43.75	875000	3000000	4375000	97.7654	0	0.544005	97.1023
			Dead	1	0	2	1	1
			Red	0	0	0	0	0
2023-07-17	773	3% FBS R3	Live	45	48	72	43	52	1040000	3000000	5200000	97.6526	0	0.793089	97.8954
			Dead	0	0	2	3	1.25
			Red	0	0	0	0	0
2023-07-24	780	3% FBS R3	Live	94	95	81	63	83.25	1665000	3000000	8325000	90.7357	0	1.47163	99.367
			Dead	6	4	3	21	8.5
			Red	0	0	0	0	0
2023-07-31	787	3% FBS R3	Live	28	27	19	21	23.75	475000	3000000	2375000	97.9381	0	-0.336839	99.367
			Dead	0	0	2	0	0.5
			Red	0	0	0	0	0
2023-08-07	794	3% FBS R3	Live	34	45	42	55	44	880000	2375000	4400000	97.2376	0	0.88906	100.256
			Dead	3	1	0	1	1.25
			Red	0	0	0	0	0
2023-08-14	801	3% FBS R3	Live	75	81	62	66	71	1420000	3000000	7100000	97.5945	0	1.24214	101.498
			Dead	2	1	2	2	1.75
			Red	0	0	0	0	0
2023-08-21	808	3% FBS R3	Live	19	13	25	22	19.75	395000	3000000	1975000	96.3415	0	-0.60276	101.498
			Dead	1	0	1	1	0.75
			Red	0	0	0	0	0
2023-08-28	815	3% FBS R3	Live	24	32	41	23	30	600000	1975000	3000000	92.3077	0	0.60276	102.101
			Dead	3	2	3	2	2.5
			Red	0	0	0	0	0
2023-09-05	823	3% FBS R3	Live	104	91	96	110	100.25	2005000	3000000	10025000	95.0237	0	1.73956	103.841
			Dead	5	3	3	10	5.25
			Red	0	0	0	0	0
2023-09-11	829	3% FBS R3	Live	20	16	21	23	20	400000	3000000	2000000	96.3855	0	-0.584623	103.841
			Dead	1	1	0	1	0.75
			Red	0	0	0	0	0
2023-09-18	836	3% FBS R3	Live	20	16	18	20	18.5	370000	2000000	1850000	96.1039	0	-0.112409	103.841
			Dead	1	1	0	1	0.75
			Red	0	0	0	0	0
2023-09-25	843	3% FBS R3	Live	32	34	24	15	26.25	525000	1850000	2625000	93.75	0	0.504499	104.345
			Dead	2	1	2	2	1.75
			Red	0	0	0	0	0
2023-10-02	850	3% FBS R3	Live	26	22	25	28	25.25	505000	2625000	2525000	98.0583	0	-0.0560015	104.345
			Dead	0	0	1	1	0.5
			Red	0	0	0	0	0
2023-10-09	857	3% FBS R3	Live	97	90	102	97	96.5	1930000	2525000	9650000	96.7419	0	1.93312	106.278
			Dead	2	4	4	3	3.25
			Red	0	0	0	0	0
2023-10-16	864	3% FBS R3	Live	52	49	53	55	52.25	1045000	3000000	5225000	97.2093	0	0.800004	107.078
			Dead	1	3	1	1	1.5
			Red	0	0	0	0	0
2023-10-23	871	3% FBS R3	Live	94	109	78	86	91.75	1835000	3000000	9175000	98.1283	0	1.61181	108.69
			Dead	2	1	3	1	1.75
			Red	0	0	0	0	0
2023-10-30	878	3% FBS R3	Live	82	87	79	90	84.5	1690000	3000000	8450000	98.2558	0	1.49312	110.183
			Dead	1	2	3	0	1.5
			Red	0	0	0	0	0
2023-11-06	885	3% FBS R3	Live	75	73	71	74	73.25	1465000	3000000	7325000	98.9865	0	1.28712	111.47
			Dead	0	1	0	2	0.75
			Red	0	0	0	0	0
2023-11-13	892	3% FBS R3	Live	83	74	90	93	85	1700000	3000000	8500000	97.9827	0	1.50163	112.972
			Dead	2	1	2	2	1.75
			Red	0	0	0	0	0
2023-11-20	899	3% FBS R3	Live	82	79	90	79	82.5	1650000	3000000	8250000	98.2143	0	1.45858	114.43
			Dead	1	1	2	2	1.5
			Red	0	0	0	0	0
2023-11-27	906	3% FBS R3	Live	113	89	105	97	101	2020000	3000000	10100000	98.2968	0	1.7503	116.181
			Dead	2	2	1	2	1.75
			Red	0	0	0	0	0
2023-12-05	914	3% FBS R3	Live	104	117	125	112	114.5	2290000	3000000	11450000	98.2833	0	1.93119	118.112
			Dead	1	3	2	2	2
			Red	0	0	0	0	0
2023-12-12	921	3% FBS R3	Live	107	99	109	104	104.75	2095000	3000000	10475000	96.1009	0	1.80287	119.915
			Dead	2	6	5	4	4.25
			Red	0	0	0	0	0
2023-12-19	928	3% FBS R3	Live	82	73	78	64	74.25	1485000	3000000	7425000	97.0588	0	1.30667	121.221
			Dead	1	1	2	5	2.25
			Red	0	0	0	0	0
2023-12-26	935	3% FBS R3	Live	53	46	52	50	50.25	1005000	3000000	5025000	98.0488	0	0.743729	121.965
			Dead	1	0	1	2	1
			Red	0	0	0	0	0
2024-01-02	942	3% FBS R3	Live	108	121	126	105	115	2300000	3000000	11500000	97.4576	0	1.93747	123.903
			Dead	2	3	4	3	3
			Red	0	0	0	0	0
2024-01-09	949	3% FBS R3	Live	125	142	156	144	141.75	2835000	3000000	14175000	95.9391	0	2.23901	126.142
			Dead	10	4	5	5	6
			Red	0	0	0	0	0
2024-01-16	956	3% FBS R3	Live	136	107	128	111	120.5	2410000	3000000	12050000	96.9819	0	2.00483	128.147
			Dead	3	4	5	3	3.75
			Red	0	0	0	0	0
2024-01-23	963	3% FBS R3	Live	99	102	124	120	111.25	2225000	3000000	11125000	96.3203	0	1.88967	130.036
			Dead	4	6	4	3	4.25
			Red	0	0	0	0	0
2024-01-30	970	3% FBS R3	Live	105	127	114	110	114	2280000	3000000	11400000	96	0	1.92488	131.961
			Dead	5	5	3	6	4.75
			Red	0	0	0	0	0
2024-02-06	977	3% FBS R3	Live	117	132	120	104	118.25	2365000	3000000	11825000	95.9432	0	1.97766	133.939
			Dead	5	6	4	5	5
			Red	0	0	0	0	0
2024-02-13	984	3% FBS R3	Live	115	112	114	120	115.25	2305000	3000000	11525000	96.4435	0	1.94061	135.879
			Dead	4	5	4	4	4.25
			Red	0	0	0	0	0
2024-02-20	991	3% FBS R3	Live	132	139	115	127	128.25	2565000	3000000	12825000	96.9754	0	2.09471	137.974
			Dead	5	4	3	4	4
			Red	0	0	0	0	0
2024-02-27	998	3% FBS R3	Live	60	72	59	77	67	1340000	3000000	6700000	97.1014	0	1.15853	139.133
			Dead	1	2	4	1	2
			Red	0	0	0	0	0
2024-03-05	1005	3% FBS R3	Live	114	88	100	102	101	2020000	3000000	10100000	96.6507	0	1.7503	140.883
			Dead	6	3	3	2	3.5
			Red	0	0	0	0	0
2024-03-12	1012	3% FBS R3	Live	121	106	94	100	105.25	2105000	3000000	10525000	95.6818	0	1.80973	142.693
			Dead	5	4	4	6	4.75
			Red	0	0	0	0	0
2024-03-19	1019	3% FBS R3	Live	83	82	85	87	84.25	1685000	3000000	8425000	95.1977	0	1.48885	144.181
			Dead	6	4	4	3	4.25
			Red	0	0	0	0	0
2024-03-26	1026	3% FBS R3	Live	114	110	104	123	112.75	2255000	3000000	11275000	97.8308	0	1.90898	146.09
			Dead	2	2	3	3	2.5
			Red	0	0	0	0	0
2024-04-02	1033	3% FBS R3	Live	171	170	183	190	178.5	3570000	3000000	17850000	97.541	0	2.5714	148.662
			Dead	5	4	6	3	4.5
			Red	0	0	0	0	0
2024-04-09	1040	3% FBS R3	Live	143	125	149	153	142.5	2850000	3000000	14250000	97.9381	0	2.24662	150.908
			Dead	4	3	3	2	3
			Red	0	0	0	0	0
2024-04-16	1047	3% FBS R3	Live	127	135	142	128	133	2660000	3000000	13300000	97.6147	0	2.14714	153.056
			Dead	4	2	4	3	3.25
			Red	0	0	0	0	0
2024-04-23	1054	3% FBS R3	Live	84	72	67	75	74.5	1490000	3000000	7450000	96.7532	0	1.31152	154.367
			Dead	2	3	2	3	2.5
			Red	0	0	0	0	0
2024-04-30	1061	3% FBS R3	Live	149	141	167	155	153	3060000	3000000	15300000	94.4444	0	2.34913	156.716
			Dead	10	8	10	8	9
			Red	0	0	0	0	0
2024-05-07	1068	3% FBS R3	Live	113	114	116	120	115.75	2315000	3000000	11575000	97.065	0	1.94685	158.663
			Dead	3	4	4	3	3.5
			Red	0	0	0	0	0
2024-05-14	1075	3% FBS R3	Live	131	139	142	146	139.5	2790000	3000000	13950000	97.3822	0	2.21594	160.879
			Dead	5	4	2	4	3.75
			Red	0	0	0	0	0
2024-05-21	1082	3% FBS R3	Live	84	89	88	87	87	1740000	3000000	8700000	97.479	0	1.53516	162.414
			Dead	1	2	4	2	2.25
			Red	0	0	0	0	0
2024-05-28	1089	3% FBS R3	Live	92	101	86	112	97.75	1955000	3000000	9775000	96.0688	0	1.70315	164.117
			Dead	6	3	4	3	4
			Red	0	0	0	0	0
2024-06-04	1096	3% FBS R3	Live	140	151	128	125	136	2720000	3000000	13600000	93.9551	0	2.17931	166.297
			Dead	10	7	11	7	8.75
			Red	0	0	0	0	0
2024-06-11	1103	3% FBS R3	Live	113	92	113	100	104.5	2090000	3000000	10450000	94.1441	0	1.79942	168.096
			Dead	4	9	9	4	6.5
			Red	0	0	0	0	0
2024-06-18	1110	3% FBS R3	Live	75	84	61	70	72.5	1450000	3000000	7250000	94.1558	0	1.27228	169.368
			Dead	3	5	7	3	4.5
			Red	0	0	0	0	0
2024-06-25	1117	3% FBS R3	Live	69	86	90	92	84.25	1685000	3000000	8425000	96.8391	0	1.48885	170.857
			Dead	2	3	4	2	2.75
			Red	0	0	0	0	0
2024-07-02	1124	3% FBS R3	Live	99	98	115	106	104.5	2090000	3000000	10450000	98.1221	0	1.79942	172.657
			Dead	2	1	2	3	2
			Red	0	0	0	0	0
2024-07-09	1131	3% FBS R3	Live	64	65	54	52	58.75	1175000	3000000	5875000	98.3264	0	0.969064	173.626
			Dead	2	1	0	1	1
			Red	0	0	0	0	0
2024-07-16	1138	3% FBS R3	Live	77	60	52	46	58.75	1175000	3000000	5875000	95.1417	0	0.969064	174.595
			Dead	6	3	1	2	3
			Red	0	0	0	0	0
2024-07-23	1145	3% FBS R3	Live	97	89	92	91	92.25	1845000	3000000	9225000	94.8586	0	1.61965	176.214
			Dead	5	6	3	6	5
			Red	0	0	0	0	0

## Sheet: 5%FBS
Table S4 – Growth and viability of L. variegatus embryonic cells - cultured in Urchin Media with 5% FBS
Date	Experiment Day	Media	Cell state	Cell Counts (hemocytometer)				Average cell counts	Cells/ml	Number cells seeded	Total cells	Viability % live cells	% Red cells	Pop doubling	Cumulative population doubling
				Ch1	Ch2	Ch3	Ch4
Lv Blastula Cell Culture in Urchin Media (UM) with 5% FBS
June 4 2021	3	5% FBS R2	Live	74	62	70	79	71.25	1425000	1290000	7125000	99.6503	0.701754	2.46409	2.46
			Dead	1	0	0	0	0.25
			Red	1	0	1	0	0.5
June 8 2021	7	5% FBS R2	Live	79	59	76	82	74	1480000	3000000	7400000	99.6633	0.337838	1.30181	3.76181
			Dead	0	1	0	0	0.25
			Red	0	1	0	0	0.25
June 11 2021	10	5% FBS R2	Live	45	36	29	38	37	740000	3000000	3700000	98.0132	0.675676	0.302387	4.06419
			Dead	0	1	1	1	0.75
			Red	0	0	0	1	0.25
June 15 2021	14	5% FBS R2	Live	27	18	37	28	27.5	550000	3000000	2750000	97.3451	0	-0.125458	4.06419
			Dead	0	1	1	1	0.75
			Red	0	0	0	0	0
June 22 2021	21	5% FBS R2	Live	66	45	55	69	58.75	1175000	2750000	5875000	93.254	0	1.09452	5.15872
			Dead	3	4	4	6	4.25
			Red	0	0	0	0	0
June 29 2021	28	5% FBS R2	Live	63	53	60	51	56.75	1135000	3000000	5675000	90.8	1.32159	0.919124	6.07784
			Dead	5	5	5	8	5.75
			Red	1	1	0	1	0.75
July 6 2021	35	5% FBS R2	Live	38	39	49	51	44.25	885000	3000000	4425000	91.7098	3.9548	0.56039	6.63823
			Dead	4	3	6	3	4
			Red	2	2	0	3	1.75
July 13 2021	42	5% FBS R2	Live	38	29	40	39	36.5	730000	3000000	3650000	83.908	1.36986	0.28277	6.921
			Dead	7	8	6	7	7
			Red	1	0	0	1	0.5
July 20 2021	49	5% FBS R2	Live	40	26	42	29	34.25	685000	3000000	3425000	91.9463	2.91971	0.191031	7.11203
			Dead	4	3	3	2	3
			Red	0	0	3	1	1
July 27 2021	56	5% FBS R2	Live	30	30	23	34	29.25	585000	3000000	2925000	85.4015	8.54701	-0.0365047	7.11203
			Dead	7	5	4	4	5
			Red	3	5	2	0	2.5
Aug 3 2021	63	5% FBS R2	Live	23	33	30	32	29.5	590000	2925000	2950000	75.1592	11.0169	0.0122712	7.1243
			Dead	10	9	9	11	9.75
			Red	2	4	3	4	3.25
Aug 10 2021	70	5% FBS R2	Live	34	34	38	30	34	680000	2925000	3400000	80	19.8529	0.216972	7.34127
			Dead	7	9	8	10	8.5
			Red	9	6	8	4	6.75
Aug 17 2021	77	5% FBS R2	Live	51	45	48	40	46	920000	3000000	4600000	84.7926	7.06522	0.616313	7.95759
			Dead	5	10	7	11	8.25
			Red	9	1	2	1	3.25
Aug 26 2021	86	5% FBS R2	Live	32	41	34	41	37	740000	3000000	3700000	76.6839	5.40541	0.302387	8.25997
			Dead	14	11	9	11	11.25
			Red	2	1	3	2	2
Sept 7 2021	98	5% FBS R2	Live	30	39	29	41	34.75	695000	3000000	3475000	81.7647	19.4245	0.211927	8.4719
			Dead	7	7	11	6	7.75
			Red	6	6	7	8	6.75
Sept 14 2021	105	5% FBS R2	Live	38	39	41	34	38	760000	3000000	3800000	82.1622	16.4474	0.340839	8.81274
			Dead	12	7	5	9	8.25
			Red	12	6	4	3	6.25
Sept 21 2021	112	5% FBS R2	Live	60	49	51	56	54	1080000	3000000	5400000	91.9149	17.5926	0.847505	9.66024
			Dead	3	4	9	3	4.75
			Red	7	6	11	14	9.5
Sept 28 2021	119	5% FBS R2	Live	35	22	25	36	29.5	590000	3000000	2950000	83.6879	13.5593	-0.0242335	9.66024
			Dead	7	6	7	3	5.75
			Red	7	1	5	3	4
Oct 5 2021	126	5% FBS R2	Live	48	56	52	57	53.25	1065000	2950000	5325000	86.9388	14.554	0.851572	10.5118
			Dead	9	12	6	5	8
			Red	8	10	8	5	7.75
Oct 12 2021	133	5% FBS R2	Live	44	46	55	48	48.25	965000	3000000	4825000	87.7273	18.1347	0.685169	11.197	reseeded all cells on 2 flasks
			Dead	5	13	3	6	6.75
			Red	7	5	13	10	8.75
Oct 19 2021	140	5% FBS R2	Live	43	39	25	25	33	660000	4825000	6600000	95.6522	17.4242	0.451675	11.6487	reseeded 6 million cells on 2 flasks
			Dead	2	2	1	1	1.5
			Red	5	9	5	4	5.75
Oct 26 2021	147	5% FBS R2	Live	37	25	34	24	30	600000	6000000	6000000	86.9565	12.5	0	11.6487	reseeded 6 million cells on 2 flasks
			Dead	2	2	6	8	4.5
			Red	6	1	6	2	3.75
Nov 2 2021	154	5% FBS R2	Live	59	62	46	48	53.75	1075000	6000000	10750000	95.1327	8.37209	0.840814	12.4895	reseeded 6 million cells on 2 flasks
			Dead	1	4	3	3	2.75
			Red	2	7	5	4	4.5
Nov 9 2021	161	5% FBS R2	Live	63	67	79	84	73.25	1465000	6000000	14650000	94.822	6.14334	1.28712	13.7766	reseeded 6 million cells on 2 flasks
			Dead	4	4	4	4	4
			Red	4	4	5	5	4.5
Nov 17 2021	169	5% FBS R2	Live	43	43	54	41	45.25	905000	3000000	4525000	97.3118	7.73481	0.592611	14.3692
			Dead	2	3	0	0	1.25
			Red	3	3	5	3	3.5
Nov 23 2021	175	5% FBS R2	Live	41	45	38	48	43	860000	3000000	4300000	96.0894	5.81395	0.519073	14.8883
			Dead	2	1	2	2	1.75
			Red	3	4	1	2	2.5
Nov 30 2021	182	5% FBS R2	Live	48	39	51	45	45.75	915000	3000000	4575000	94.8187	8.19672	0.608456	15.4967
			Dead	2	2	2	4	2.5
			Red	5	8	1	1	3.75
Dec 7 2021	189	5% FBS R2	Live	71	53	51	71	61.5	1230000	3000000	6150000	96.0938	3.25203	1.03502	16.5318
			Dead	2	1	3	4	2.5
			Red	1	2	1	4	2
Dec 14 2021	196	5% FBS R2	Live	57	57	58	57	57.25	1145000	3000000	5725000	97.0339	2.18341	0.931772	17.4635
			Dead	1	3	2	1	1.75
			Red	0	0	2	3	1.25
Dec 21 2021	203	5% FBS R2	Live	67	70	79	74	72.5	1450000	3000000	7250000	96.6667	0.689655	1.27228	18.7358
			Dead	3	3	2	2	2.5
			Red	1	1	0	0	0.5
Dec 28 2021	210	5% FBS R2	Live	67	66	66	68	66.75	1335000	3000000	6675000	95.0178	2.99625	1.15314	19.8889
			Dead	1	7	3	3	3.5
			Red	1	2	2	3	2
Jan 3 2022	216	5% FBS R2	Live	69	47	58	74	62	1240000	3000000	6200000	99.2	3.62903	1.0467	20.9356
			Dead	1	1	0	0	0.5
			Red	1	1	2	5	2.25
Jan 10 2022	223	5% FBS R2	Live	82	61	83	64	72.5	1450000	3000000	7250000	98.9761	2.06897	1.27228	22.2079
			Dead	0	1	1	1	0.75
			Red	2	2	1	1	1.5
Jan 18 2022	230	5% FBS R2	Live	70	65	84	74	73.25	1465000	3000000	7325000	98.9865	0.682594	1.28712	23.495
			Dead	1	1	0	1	0.75
			Red	0	1	0	1	0.5
Jan 24 2022	236	5% FBS R2	Live	45	39	42	39	41.25	825000	3000000	4125000	99.3976	3.0303	0.459165	23.9542
			Dead	0	1	0	0	0.25
			Red	0	2	0	3	1.25
Feb 1 2022	243	5% FBS R2	Live	56	46	58	46	51.5	1030000	3000000	5150000	98.0952	3.39806	0.779157	24.7334
			Dead	2	1	1	0	1
			Red	4	0	1	2	1.75
Feb 7 2022	250	5% FBS R2	Live	67	50	36	42	48.75	975000	3000000	4875000	100	2.05128	0.700033	25.4334
			Dead	0	0	0	0	0
			Red	2	1	1	0	1
2022-02-14	257	5% FBS R2	Live	37	56	67	48	52	1040000	3000000	5200000	99.0476	2.40385	0.793089	26.2265
			Dead	0	0	0	2	0.5
			Red	0	3	0	2	1.25
2022-02-22	264	5% FBS R2	Live	123	125	143	117	127	2540000	3000000	12700000	99.2188	0.393701	2.08059	28.3071
			Dead	1	1	2	0	1
			Red	0	0	1	1	0.5
2022-02-28	270	5% FBS R2	Live	74	53	67	79	68.25	1365000	3000000	6825000	98.2014	0	1.18518	29.4922
			Dead	4	0	1	0	1.25
			Red	0	0	0	0	0
2022-03-07	277	5% FBS R2	Live	37	55	41	43	44	880000	3000000	4400000	98.8764	0	0.55222	30.0445
			Dead	0	0	2	0	0.5
			Red	0	0	0	0	0
2022-03-14	284	5% FBS R2	Live	38	37	52	33	40	800000	3000000	4000000	99.3789	0	0.414797	30.4593
			Dead	0	1	0	0	0.25
			Red	0	0	0	0	0
2022-03-21	291	5% FBS R2	Live	71	73	69	82	73.75	1475000	3000000	7375000	100	0	1.29693	31.7562
			Dead	0	0	0	0	0
			Red	0	0	0	0	0
2022-03-29	299	5% FBS R2	Live	139	131	148	160	144.5	2890000	3000000	14450000	96.8174	0	2.26672	34.0229
			Dead	2	9	2	6	4.75
			Red	0	0	0	0	0
2022-04-02	306	5% FBS R2	Live	114	103	94	108	104.75	2095000	3000000	10475000	97.8972	0.71599	1.80287	35.8258
			Dead	0	4	3	2	2.25
			Red	0	0	1	2	0.75
2022-04-11	313	5% FBS R2	Live	66	48	112	73	74.75	1495000	3000000	7475000	99.0066	0	1.31635	37.1421
			Dead	1	0	0	2	0.75
			Red	0	0	0	0	0
2022-04-18	320	5% FBS R2	Live	53	49	60	53	53.75	1075000	3000000	5375000	98.6239	0	0.840814	37.9829
			Dead	0	1	0	2	0.75
			Red	0	0	0	0	0
2022-04-25	327	5% FBS R2	Live	31	24	29	59	35.75	715000	3000000	3575000	92.8571	0.699301	0.252834	38.2358
			Dead	1	1	2	7	2.75
			Red	0	1	0	0	0.25
2022-05-02	334	5% FBS R2	Live	52	55	68	60	58.75	1175000	3000000	5875000	99.5763	0.425532	0.969064	39.2048
			Dead	0	0	1	0	0.25
			Red	0	1	0	0	0.25
2022-05-11	343	5% FBS R2	Live	248	320	320	284	293	5860000	3000000	29300000	99.154	0	3.28596	42.4908
			Dead	2	3	1	4	2.5
			Red	0	0	0	0	0
2022-05-16	348	5% FBS R2	Live	101	88	114	117	105	2100000	3000000	10500000	99.2908	0.47619	1.80631	44.2971
			Dead	2	0	1	0	0.75
			Red	1	0	1	0	0.5
2022-05-23	355	5% FBS R2	Live	156	174	153	156	159.75	3195000	3000000	15975000	98.6111	0.156495	2.41138	46.7085
			Dead	5	1	0	3	2.25
			Red	0	0	0	1	0.25
2022-05-31	363	5% FBS R2	Live	31	34	43	19	31.75	635000	3000000	3175000	96.9466	0	0.0817466	46.7902
			Dead	2	1	1	0	1
			Red	0	0	0	0	0
2022-06-06	369	5% FBS R2	Live	38	35	29	42	36	720000	3000000	3600000	97.9592	0	0.262882	47.0531
			Dead	2	1	0	0	0.75
			Red	0	0	0	0	0
2022-06-13	376	5% FBS R2	Live	154	128	133	172	146.75	2935000	3000000	14675000	98.9882	0	2.289	49.3421
			Dead	1	2	1	2	1.5
			Red	0	0	0	0	0
2022-06-20	383	5% FBS R2	Live	70	74	95	93	83	1660000	3000000	8300000	95.1289	0	1.4673	50.8094
			Dead	2	4	4	7	4.25
			Red	0	0	0	0	0
2022-06-28	390	5% FBS R2	Live	83	86	79	80	82	1640000	3000000	8200000	98.7952	0	1.44982	52.2592
			Dead	1	2	0	1	1
			Red	0	0	0	0	0
2022-07-05	398	5% FBS R2	Live	74	93	60	60	71.75	1435000	3000000	7175000	99.308	0	1.25729	53.5165
			Dead	0	1	0	1	0.5
			Red	0	0	0	0	0
2022-07-11	404	5% FBS R2	Live	102	102	113	167	121	2420000	3000000	12100000	96.8	0	2.0108	55.5273
			Dead	1	0	2	13	4
			Red	0	0	0	0	0
2022-07-18	411	5% FBS R2	Live	146	109	122	125	125.5	2510000	3000000	12550000	98.4314	0	2.06345	57.5908
			Dead	4	1	1	2	2
			Red	0	0	0	0	0
2022-07-26	418	5% FBS R2	Live	150	119	180	172	155.25	3105000	3000000	15525000	99.2013	0	2.37018	59.961
			Dead	0	1	1	3	1.25
			Red	0	0	0	0	0
2022-08-02	425	5% FBS R2	Live	77	81	74	76	77	1540000	3000000	7700000	99.6764	0	1.35911	61.3201
			Dead	1	0	0	0	0.25
			Red	0	0	0	0	0
2022-08-09	432	5% FBS R2	Live	180	171	183	283	204.25	4085000	3000000	20425000	97.9616	0	2.7657	64.0858
			Dead	7	3	4	3	4.25
			Red	0	0	0	0	0
2022-08-16	439	5% FBS R2	Live	113	85	106	92	99	1980000	3000000	9900000	100	0	1.72147	65.8072
			Dead	0	0	0	0	0
			Red	0	0	0	0	0
2022-08-22	445	5% FBS R2	Live	55	51	67	54	56.75	1135000	3000000	5675000	99.5614	0	0.919124	66.7263
			Dead	1	0	0	0	0.25
			Red	0	0	0	0	0
2022-08-29	452	5% FBS R2	Live	57	46	62	61	56.5	1130000	3000000	5650000	97.8355	0	0.912758	67.6391
			Dead	0	2	1	2	1.25
			Red	0	0	0	0	0
2022-09-06	460	5% FBS R2	Live	106	80	100	105	97.75	1955000	3000000	9775000	98.7374	0	1.70315	69.3422
			Dead	0	1	2	2	1.25
			Red	0	0	0	0	0
2022-09-12	466	5% FBS R2	Live	65	68	72	58	65.75	1315000	3000000	6575000	97.4074	0	1.13137	70.4736
			Dead	2	2	2	1	1.75
			Red	0	0	0	0	0
2022-09-19	473	5% FBS R2	Live	95	140	126	125	121.5	2430000	3000000	12150000	97.7867	0	2.01675	72.4904
			Dead	3	1	5	2	2.75
			Red	0	0	0	0	0
2022-09-26	480	5% FBS R2	Live	75	89	80	80	81	1620000	3000000	8100000	98.7805	0	1.43213	73.9225
			Dead	3	0	0	1	1
			Red	0	0	0	0	0
2022-10-03	487	5% FBS R2	Live	84	85	99	81	87.25	1745000	3000000	8725000	96.6759	0	1.5393	75.4618
			Dead	4	2	4	2	3
			Red	0	0	0	0	0
2022-10-10	494	5% FBS R2	Live	43	62	47	48	50	1000000	3000000	5000000	100	0	0.736538	76.1983
			Dead	0	0	0	0	0
			Red	0	0	0	0	0
2022-10-17	501	5% FBS R2	Live	62	83	84	101	82.5	1650000	3000000	8250000	98.2143	0.30303	1.45858	77.6569
			Dead	1	1	2	2	1.5
			Red	1	0	0	0	0.25
2022-10-24	508	5% FBS R2	Live	64	71	79	79	73.25	1465000	3000000	7325000	98.9865	0	1.28712	78.944
			Dead	0	1	2	0	0.75
			Red	0	0	0	0	0
2022-10-31	515	5% FBS R2	Live	101	94	71	101	91.75	1835000	3000000	9175000	97.0899	0	1.61181	80.5558
			Dead	3	4	2	2	2.75
			Red	0	0	0	0	0
2022-11-07	522	5% FBS R2	Live	17	39	32	27	28.75	575000	3000000	2875000	98.2906	0	-0.0613649	80.5558
			Dead	0	0	1	1	0.5
			Red	0	0	0	0	0
2022-11-14	529	5% FBS R2	Live	57	41	42	57	49.25	985000	2875000	4925000	97.0443	0	0.776111	81.332
			Dead	1	2	2	1	1.5
			Red	0	0	0	0	0
2022-11-21	536	5% FBS R2	Live	118	110	117	120	116.25	2325000	3000000	11625000	97.2803	0	1.95306	83.285
			Dead	0	1	4	8	3.25
			Red	0	0	0	0	0
2022-11-28	543	5% FBS R2	Live	72	75	71	83	75.25	1505000	3000000	7525000	99.6689	0	1.32596	84.611
			Dead	1	0	0	0	0.25
			Red	0	0	0	0	0
2022-12-05	550	5% FBS R2	Live	271	215	276	236	249.5	4990000	3000000	24950000	97.8431	0	3.05423	87.6652
			Dead	7	3	5	7	5.5
			Red	0	0	0	0	0
2022-12-12	557	5% FBS R2	Live	127	107	116	110	115	2300000	3000000	11500000	99.1379	0	1.93747	89.6027
			Dead	0	2	1	1	1
			Red	0	0	0	0	0
2022-12-19	564	5% FBS R2	Live	69	66	67	61	65.75	1315000	3000000	6575000	98.8722	0	1.13137	90.7341
			Dead	2	1	0	0	0.75
			Red	0	0	0	0	0
2022-12-27	572	5% FBS R2	Live	64	40	63	62	57.25	1145000	3000000	5725000	95.0207	0	0.931772	91.6658
			Dead	3	4	3	2	3
			Red	0	0	0	0	0
2023-01-03	578	5% FBS R2	Live	104	109	121	89	105.75	2115000	3000000	10575000	98.6014	0.236407	1.81657	93.4824
			Dead	0	2	2	2	1.5
			Red	0	0	0	1	0.25
2023-01-09	584	5% FBS R2	Live	50	52	55	46	50.75	1015000	3000000	5075000	96.6667	0	0.758005	94.2404
			Dead	1	2	1	3	1.75
			Red	0	0	0	0	0
2023-01-17	592	5% FBS R2	Live	49	65	99	66	69.75	1395000	3000000	6975000	97.8947	0	1.21652	95.4569
			Dead	1	0	2	3	1.5
			Red	0	0	0	0	0
2023-01-23	598	5% FBS R2	Live	36	45	43	58	45.5	910000	3000000	4550000	96.8085	0	0.600555	96.0575
			Dead	0	4	1	1	1.5
			Red	0	0	0	0	0
2023-01-31	606	5% FBS R2	Live	48	65	60	57	57.5	1150000	3000000	5750000	97.0464	0	0.938055	96.9955
			Dead	1	3	1	2	1.75
			Red	0	0	0	0	0
2023-02-06	612	5% FBS R2	Live	49	52	60	46	51.75	1035000	3000000	5175000	98.1043	0	0.78614	97.7817
			Dead	1	2	0	1	1
			Red	0	0	0	0	0
2023-02-13	619	5% FBS R2	Live	16	20	15	21	18	360000	3000000	1800000	100	0	-0.736538	97.7817
			Dead	0	0	0	0	0
			Red	0	0	0	0	0
2023-02-20	626	5% FBS R2	Live	46	36	39	63	46	920000	1800000	4600000	97.3545	0	1.35285	99.1345
			Dead	1	0	1	3	1.25
			Red	0	0	0	0	0
2023-02-27	633	5% FBS R2	Live	53	54	47	43	49.25	985000	3000000	4925000	96.0976	0	0.714746	99.8493
			Dead	3	2	1	2	2
			Red	0	0	0		0
2023-03-06	640	5% FBS R2	Live	113	110	134	140	124.25	2485000	3000000	12425000	99.5992	0	2.04902	101.898
			Dead	1	0	1	0	0.5
			Red	0	0	0	0	0
2023-03-13	647	5% FBS R2	Live	87	88	83	76	83.5	1670000	3000000	8350000	97.9472	0	1.47596	103.374
			Dead	3	1	2	1	1.75
			Red	0	0	0	0	0
2023-03-20	654	5% FBS R2	Live	46	50	56	44	49	980000	3000000	4900000	93.7799	0	0.707408	104.082
			Dead	3	2	6	2	3.25
			Red	0	0	0	0	0
2023-03-27	661	5% FBS R2	Live	46	55	47	51	49.75	995000	3000000	4975000	94.7619	0	0.72931	104.811
			Dead	2	3	3	3	2.75
			Red	0	0	0	0	0
2023-04-03	668	5% FBS R2	Live	60	46	51	46	50.75	1015000	3000000	5075000	97.1292	0	0.758005	105.569
			Dead	0	3	2	1	1.5
			Red	0	0	0	0	0
2023-04-10	675	5% FBS R2	Live	63	54	53	56	56.5	1130000	3000000	5650000	94.5607	0	0.912758	106.482
			Dead	8	2	1	2	3.25
			Red	0	0	0	0	0
2023-04-17	682	5% FBS R2	Live	26	24	33	28	27.75	555000	3000000	2775000	99.1071	0	-0.112409	106.482
			Dead	0	0	0	1	0.25
			Red	0	0	0	0	0
2023-04-24	689	5% FBS R2	Live	29	23	13	22	21.75	435000	2775000	2175000	100	0	-0.351268	106.482
			Dead	0	0	0	0	0
			Red	0	0	0	0	0
2023-05-01	696	5% FBS R2	Live	31	33	33	44	35.25	705000	2175000	3525000	99.2958	0	0.696204	107.178
			Dead	0	1	0	0	0.25
			Red	0	0	0	0	0
2023-05-08	703	5% FBS R2	Live	66	64	72	62	66	1320000	3000000	6600000	99.2481	0	1.13684	108.315
			Dead	1	1	0	0	0.5
			Red	0	0	0	0	0
2023-05-15	710	5% FBS R2	Live	81	79	85	82	81.75	1635000	3000000	8175000	94.2363	0	1.44542	109.76
			Dead	3	4	8	5	5
			Red	0	0	0	0	0
2023-05-22	717	5% FBS R2	Live	49	32	50	32	40.75	815000	3000000	4075000	99.3902	0	0.441581	110.202
			Dead	1	0	0	0	0.25
			Red	0	0	0	0	0
2023-05-29	724	5% FBS R2	Live	46	42	47	46	45.25	905000	3000000	4525000	97.8378	0	0.592611	110.794
			Dead	1	0	1	2	1
			Red	0	0	0	0	0
2023-06-05	731	5% FBS R2	Live	69	73	82	90	78.5	1570000	3000000	7850000	97.8193	0	1.38692	112.181
			Dead	2	2	3	0	1.75
			Red	0	0	0	0	0
2023-06-12	738	5% FBS R2	Live	94	60	65	64	70.75	1415000	3000000	7075000	97.2509	0	1.23705	113.418
			Dead	4	1	1	2	2
			Red	0	0	0	0	0
2023-06-19	745	5% FBS R2	Live	48	41	53	43	46.25	925000	3000000	4625000	98.4043	0	0.624128	114.042
			Dead	2	1	0	0	0.75
			Red	0	0	0	0	0
2023-06-26	752	5% FBS R2	Live	30	32	38	36	34	680000	3000000	3400000	97.8417	0	0.180467	114.223
			Dead	0	2	1	0	0.75
			Red	0	0	0	0	0
2023-07-05	761	5% FBS R2	Live	22	22	21	33	24.5	490000	3000000	2450000	98	0	-0.292011	114.223
			Dead	0	0	2	0	0.5
			Red	0	0	0	0	0
2023-07-10	766	5% FBS R2	Live	50	48	50	49	49.25	985000	2450000	4925000	98.5	0	1.00676	115.23
			Dead	0	1	1	1	0.75
			Red	0	0	0	0	0
2023-07-17	773	5% FBS R2	Live	120	122	145	109	124	2480000	3000000	12400000	98.6083	0	2.04612	117.276
			Dead	2	1	3	1	1.75
			Red	0	0	0	0	0
2023-07-24	780	5% FBS R2	Live	39	34	47	46	41.5	830000	3000000	4150000	95.9538	0	0.467877	117.744
			Dead	1	0	3	3	1.75
			Red	0	0	0	0	0
2023-07-31	787	5% FBS R2	Live	47	53	38	32	42.5	850000	3000000	4250000	100	0	0.502209	118.246
			Dead	0	0	0	0	0
			Red	0	0	0	0	0
2023-08-07	794	5% FBS R2	Live	56	61	60	46	55.75	1115000	3000000	5575000	96.9565	0	0.89349	119.139
			Dead	0	2	1	4	1.75
			Red	0	0	0	0	0
2023-08-14	801	5% FBS R2	Live	33	26	30	39	32	640000	3000000	3200000	99.2248	0	0.0930554	119.232
			Dead	0	1	0	0	0.25
			Red	0	0	0	0	0
2023-08-21	808	5% FBS R2	Live	55	69	60	62	61.5	1230000	3000000	6150000	96.0938	0	1.03502	120.267
			Dead	1	3	0	6	2.5
			Red	0	0	0	0	0
2023-08-28	815	5% FBS R2	Live	98	81	84	72	83.75	1675000	3000000	8375000	95.7143	0	1.48027	121.748
			Dead	4	6	4	1	3.75
			Red	0	0	0	0	0
2023-09-05	823	5% FBS R2	Live	48	49	52	59	52	1040000	3000000	5200000	95.4128	0	0.793089	122.541
			Dead	2	4	0	4	2.5
			Red	0	0	0	0	0
2023-09-11	829	5% FBS R2	Live	20	21	25	32	24.5	490000	3000000	2450000	94.2308	0	-0.292011	122.541
			Dead	1	2	0	3	1.5
			Red	0	0	0	0	0
2023-09-18	836	5% FBS R2	Live	30	31	40	38	34.75	695000	2450000	3475000	95.8621	0	0.503939	123.045
			Dead	1	2	0	3	1.5
			Red	0	0	0	0	0
2023-09-25	843	5% FBS R2	Live	20	23	33	32	27	540000	3000000	2700000	90.7563	0	-0.151915	123.045
			Dead	3	2	2	4	2.75
			Red	0	0	0	0	0
2023-10-02	850	5% FBS R2	Live	29	40	35	41	36.25	725000	2700000	3625000	96.6667	0	0.424775	123.47
			Dead	1	1	2	1	1.25
			Red	0	0	0	0	0
2023-10-09	857	5% FBS R2	Live	62	71	83	76	73	1460000	3000000	7300000	96.6887	0	1.28219	124.752
			Dead	2	3	2	3	2.5
			Red	0	0	0	0	0
2023-10-16	864	5% FBS R2	Live	61	36	50	49	49	980000	3000000	4900000	97.0297	0	0.707408	125.459
			Dead	2	1	2	1	1.5
			Red	0	0	0	0	0
2023-10-23	871	5% FBS R2	Live	91	86	80	93	87.5	1750000	3000000	8750000	98.5915	0	1.54342	127.003
			Dead	1	2	0	2	1.25
			Red	0	0	0	0	0
2023-10-30	878	5% FBS R2	Live	92	78	85	89	86	1720000	3000000	8600000	97.1751	0	1.51849	128.521
			Dead	3	1	4	2	2.5
			Red	0	0	0	0	0
2023-11-06	885	5% FBS R2	Live	49	57	72	58	59	1180000	3000000	5900000	96.7213	0	0.975186	129.496
			Dead	2	3	2	1	2
			Red	0	0	0	0	0
2023-11-13	892	5% FBS R2	Live	78	92	86	94	87.5	1750000	3000000	8750000	97.493	0	1.54342	131.04
			Dead	3	1	2	3	2.25
			Red	0	0	0	0	0
2023-11-20	899	5% FBS R2	Live	85	73	72	79	77.25	1545000	3000000	7725000	97.1698	0	1.36378	132.403
			Dead	4	2	2	1	2.25
			Red	0	0	0	0	0
2023-11-27	906	5% FBS R2	Live	77	83	82	88	82.5	1650000	3000000	8250000	97.6331	0	1.45858	133.862
			Dead	2	3	1	2	2
			Red	0	0	0	0	0
2023-12-05	914	5% FBS R2	Live	132	119	126	120	124.25	2485000	3000000	12425000	97.8346	0	2.04902	135.911
			Dead	3	5	2	1	2.75
			Red	0	0	0	0	0
2023-12-12	921	5% FBS R2	Live	102	82	70	103	89.25	1785000	3000000	8925000	97.2752	0	1.57198	137.483
			Dead	2	3	3	2	2.5
			Red	0	0	0	0	0
2023-12-19	928	5% FBS R2	Live	74	69	82	79	76	1520000	3000000	7600000	98.0645	0	1.34026	138.823
			Dead	1	2	2	1	1.5
			Red	0	0	0	0	0
2023-12-26	935	5% FBS R2	Live	28	47	35	35	36.25	725000	3000000	3625000	96.6667	0	0.27286	139.096
			Dead	0	2	1	2	1.25
			Red	0	0	0	0	0
2024-01-02	942	5% FBS R2	Live	72	48	57	55	58	1160000	3000000	5800000	97.8903	0	0.950538	140.047
			Dead	2	0	1	2	1.25
			Red	0	0	0	0	0
2024-01-09	949	5% FBS R2	Live	73	78	81	94	81.5	1630000	3000000	8150000	93.4097	0	1.441	141.488
			Dead	5	4	4	10	5.75
			Red	0	0	0	0	0
2024-01-16	956	5% FBS R2	Live	128	143	108	129	127	2540000	3000000	12700000	96.3947	0	2.08059	143.568
			Dead	5	4	7	3	4.75
			Red	0	0	0	0	0
2024-01-23	963	5% FBS R2	Live	82	90	87	95	88.5	1770000	3000000	8850000	96.4578	0	1.55981	145.128
			Dead	2	2	5	4	3.25
			Red	0	0	0	0	0
2024-01-30	970	5% FBS R2	Live	56	53	60	62	57.75	1155000	3000000	5775000	96.6527	0	0.94431	146.072
			Dead	1	2	3	2	2
			Red	0	0	0	0	0
2024-02-06	977	5% FBS R2	Live	97	96	83	102	94.5	1890000	3000000	9450000	96.9231	0	1.65439	147.727
			Dead	3	3	4	2	3
			Red	0	0	0	0	0
2024-02-13	984	5% FBS R2	Live	159	139	142	135	143.75	2875000	3000000	14375000	96.9646	0	2.25922	149.986
			Dead	2	4	6	6	4.5
			Red	0	0	0	0	0
2024-02-20	991	5% FBS R2	Live	110	131	107	112	115	2300000	3000000	11500000	97.2516	0	1.93747	151.923
			Dead	6	2	3	2	3.25
			Red	0	0	0	0	0
2024-02-27	998	5% FBS R2	Live	183	176	233	243	208.75	4175000	3000000	20875000	93.192	0	2.79712	154.721
			Dead	9	15	19	18	15.25
			Red	0	0	0	0	0
2024-03-05	1005	5% FBS R2	Live	131	126	133	128	129.5	2590000	3000000	12950000	96.1039	0	2.10869	156.829
			Dead	3	7	5	6	5.25
			Red	0	0	0	0	0
2024-03-12	1012	5% FBS R2	Live	80	75	79	75	77.25	1545000	3000000	7725000	97.4763	0	1.36378	158.193
			Dead	2	2	3	1	2
			Red	0	0	0	0	0
2024-03-19	1019	5% FBS R2	Live	85	89	92	76	85.5	1710000	3000000	8550000	97.7143	0	1.51008	159.703
			Dead	2	3	1	2	2
			Red	0	0	0	0	0
2024-03-26	1026	5% FBS R2	Live	120	123	120	108	117.75	2355000	3000000	11775000	97.5155	0	1.97155	161.675
			Dead	5	1	4	2	3
			Red	0	0	0	0	0
2024-04-02	1033	5% FBS R2	Live	156	163	168	159	161.5	3230000	3000000	16150000	97.1429	0	2.42709	164.102
			Dead	4	5	6	4	4.75
			Red	0	0	0	0	0
2024-04-09	1040	5% FBS R2	Live	116	117	143	116	123	2460000	3000000	12300000	98.2036	0	2.03444	166.136
			Dead	1	3	3	2	2.25
			Red	0	0	0	0	0
2024-04-16	1047	5% FBS R2	Live	99	104	92	118	103.25	2065000	3000000	10325000	98.0998	0	1.78207	167.918
			Dead	1	2	3	2	2
			Red	0	0	0	0	0
2024-04-23	1054	5% FBS R2	Live	158	184	155	162	164.75	3295000	3000000	16475000	97.4852	0	2.45582	170.374
			Dead	2	6	5	4	4.25
			Red	0	0	0	0	0
2024-04-30	1061	5% FBS R2	Live	93	80	78	96	86.75	1735000	3000000	8675000	96.9274	0	1.53101	171.905
			Dead	4	3	2	2	2.75
			Red	0	0	0	0	0
2024-05-07	1068	5% FBS R2	Live	117	128	117	119	120.25	2405000	3000000	12025000	97.1717	0	2.00184	173.907
			Dead	4	2	3	5	3.5
			Red	0	0	0	0	0
2024-05-14	1075	5% FBS R2	Live	85	74	84	92	83.75	1675000	3000000	8375000	97.3837	0	1.48027	175.387
			Dead	3	1	3	2	2.25
			Red	0	0	0	0	0
2024-05-21	1082	5% FBS R2	Live	110	112	126	121	117.25	2345000	3000000	11725000	96.701	0	1.96541	177.353
			Dead	4	3	3	6	4
			Red	0	0	0	0	0
2024-05-28	1089	5% FBS R2	Live	121	127	118	115	120.25	2405000	3000000	12025000	96.5863	0	2.00184	179.355
			Dead	4	5	5	3	4.25
			Red	0	0	0	0	0
2024-06-04	1096	5% FBS R2	Live	142	158	125	152	144.25	2885000	3000000	14425000	94.281	0	2.26422	181.619
			Dead	13	6	10	6	8.75
			Red	0	0	0	0	0
2024-06-11	1103	5% FBS R2	Live	77	86	86	83	83	1660000	3000000	8300000	94.3182	0	1.4673	183.086
			Dead	5	4	7	4	5
			Red	0	0	0	0	0
2024-06-18	1110	5% FBS R2	Live	79	87	72	92	82.5	1650000	3000000	8250000	96.7742	0	1.45858	184.545
			Dead	3	2	4	2	2.75
			Red	0	0	0	0	0
2024-06-25	1117	5% FBS R2	Live	76	67	78	80	75.25	1505000	3000000	7525000	96.1661	0	1.32596	185.871
			Dead	3	3	4	2	3
			Red	0	0	0	0	0
2024-07-02	1124	5% FBS R2	Live	71	71	74	69	71.25	1425000	3000000	7125000	97.2696	0	1.2472	187.118
			Dead	3	2	2	1	2
			Red	0	0	0	0	0
2024-07-09	1131	5% FBS R2	Live	22	12	24	14	18	360000	3000000	1800000	96	0	-0.736538	187.118
			Dead	0	0	2	1	0.75
			Red	0	0	0	0	0
2024-07-16	1138	5% FBS R2	Live	39	43	50	35	41.75	835000	1800000	4175000	98.8166	0	1.21307	188.331
			Dead	1	0	0	1	0.5
			Red	0	0	0	0	0
2024-07-23	1145	5% FBS R2	Live	169	156	164	170	164.75	3295000	3000000	16475000	97.6296	0	2.45582	190.787
			Dead	5	3	4	4	4
			Red	0	0	0	0	0

## Sheet: 10%FBS
Table S4 – Growth and viability of L. variegatus embryonic cells - cultured in Urchin Media with 10% FBS
Date	Experiment Day	Media	Cell state	Cell Counts (hemocytometer)				Average cell counts	Cells/ml	Number cells seeded	Total cells	Viability % live cells	% Red cells	Pop doubling	Cumulative population doubling
				Ch1	Ch2	Ch3	Ch4
Lv Blastula Cell Culture in Urchin Media (UM) with 10% FBS
June 4 2021	3	10% FBS R1	Live	83	73	82	75	78.25	1565000	1290000	7825000	99.0506	0.319489	2.59921	2.6
			Dead	1	0	0	2	0.75
			Red	0	0	1	0	0.25
June 8 2021	7	10% FBS R1	Live	88	103	73	70	83.5	1670000	3000000	8350000	99.4048	0.299401	1.47596	4.07596
			Dead	1	0	1	0	0.5
			Red	0	1	0	0	0.25
June 11 2021	10	10% FBS R1	Live	29	31	26	38	31	620000	3000000	3100000	99.2	0	0.0472783	4.12323
			Dead	1	0	0	0	0.25
			Red	0	0	0	0	0
June 15 2021	14	10% FBS R1	Live	31	39	36	37	35.75	715000	3000000	3575000	97.2789	0.699301	0.252834	4.37607
			Dead	0	1	1	2	1
			Red	0	1	0	0	0.25
June 22 2021	21	10% FBS R1	Live	58	38	49	50	48.75	975000	3000000	4875000	96.5347	0	0.700033	5.0761
			Dead	1	2	3	1	1.75
			Red	0	0	0	0	0
June 29 2021	28	10% FBS R1	Live	62	60	56	69	61.75	1235000	3000000	6175000	95.3668	4.45344	1.04087	6.11697
			Dead	3	4	4	1	3
			Red	3	3	1	4	2.75
July 6 2021	35	10% FBS R1	Live	48	43	51	46	47	940000	3000000	4700000	95.9184	4.25532	0.647322	6.7643
			Dead	1	3	2	2	2
			Red	5	2	1	0	2
July 13 2021	42	10% FBS R1	Live	28	26	28	33	28.75	575000	3000000	2875000	87.7863	0.869565	-0.0613649	6.7643
			Dead	5	5	3	3	4
			Red	0	1	0	0	0.25
July 20 2021	49	10% FBS R1	Live	31	27	31	40	32.25	645000	2875000	3225000	96.2687	8.52713	0.165641	6.92994
			Dead	1	1	2	1	1.25
			Red	3	4	2	2	2.75
July 27 2021	56	10% FBS R1	Live	23	32	43	42	35	700000	3000000	3500000	90.9091	2.14286	0.222263	7.1522
			Dead	2	3	2	7	3.5
			Red	1	1	1	0	0.75
Aug 3 2021	63	10% FBS R1	Live	40	51	45	53	47.25	945000	3000000	4725000	95.9391	13.7566	0.654971	7.80717
			Dead	2	2	1	3	2
			Red	8	7	5	6	6.5
Aug 10 2021	70	10% FBS R1	Live	46	47	37	53	45.75	915000	3000000	4575000	93.8462	21.8579	0.608456	8.41563
			Dead	2	4	3	3	3
			Red	9	7	11	13	10
Aug 17 2021	77	10% FBS R1	Live	31	37	38	44	37.5	750000	3000000	3750000	98.0392	22	0.321741	8.73737
			Dead	0	1	1	1	0.75
			Red	10	8	6	9	8.25
Aug 26 2021	86	10% FBS R1	Live	40	32	37	43	38	760000	3000000	3800000	96.2025	13.8158	0.340839	9.07821
			Dead	2	1	1	2	1.5
			Red	5	6	4	6	5.25
Sept 7 2021	98	10% FBS R1	Live	44	38	42	28	38	760000	3000000	3800000	91.5663	10.5263	0.340839	9.41905
			Dead	4	5	3	2	3.5
			Red	6	4	5	1	4
Sept 14 2021	105	10% FBS R1	Live	28	39	29	40	34	680000	3000000	3400000	88.8889	13.2353	0.180467	9.59951
			Dead	2	6	5	4	4.25
			Red	1	5	5	7	4.5
Sept 21 2021	112	10% FBS R1	Live	71	82	89	85	81.75	1635000	3000000	8175000	98.1982	8.56269	1.44542	11.0449	reseeded 6 million cells on 2 flasks
			Dead	2	2	1	1	1.5
			Red	7	7	4	10	7
Sept 28 2021	119	10% FBS R1	Live	93	92	90	79	88.5	1770000	6000000	17700000	97.5207	1.69492	1.55981	12.6047	reseeded 6 million cells on 2 flasks
			Dead	2	2	2	3	2.25
			Red	1	1	3	1	1.5
Oct 5 2021	126	10% FBS R1	Live	65	68	58	63	63.5	1270000	6000000	12700000	97.6923	3.14961	1.08117	13.6859	reseeded 6 million cells on 2 flasks
			Dead	2	1	0	3	1.5
			Red	5	0	0	3	2
Oct 12 2021	133	10% FBS R1	Live	48	45	52	41	46.5	930000	6000000	9300000	98.4127	1.07527	0.631901	14.3178	reseeded 6 million cells on 2 flasks
			Dead	1	0	1	1	0.75
			Red	0	1	1	0	0.5
Oct 19 2021	140	10% FBS R1	Live	37	42	40	23	35.5	710000	6000000	7100000	97.931	0.704225	0.242716	14.5605	reseeded 6 million cells on 2 flasks
			Dead	0	1	1	1	0.75
			Red	1	0	0	0	0.25
Oct 26 2021	147	10% FBS R1	Live	28	32	32	34	31.5	630000	6000000	6300000	94.7368	1.5873	0.0703485	14.6309	reseeded 6 million cells on 2 flasks
			Dead	2	3	0	2	1.75
			Red	0	1	0	1	0.5
Nov 2 2021	154	10% FBS R1	Live	33	34	33	52	38	760000	6000000	7600000	98.0645	2.63158	0.340839	14.9717	reseeded 6 million cells on 2 flasks
			Dead	0	1	0	2	0.75
			Red	1	1	2	0	1
Nov 9 2021	161	10% FBS R1	Live	58	46	47	58	52.25	1045000	6000000	10450000	96.7593	1.43541	0.800004	15.7717
			Dead	2	1	3	1	1.75
			Red	0	2	1	0	0.75
Nov 17 2021	169	10% FBS R1	Live	87	87	91	86	87.75	1755000	3000000	8775000	98.3193	0	1.54754	17.3193
			Dead	1	1	2	2	1.5
			Red	0	0	0	0	0
Nov 23 2021	175	10% FBS R1	Live	53	59	64	72	62	1240000	3000000	6200000	98.8048	0.403226	1.0467	18.366
			Dead	0	1	0	2	0.75
			Red	0	0	0	1	0.25
Nov 30 2021	182	10% FBS R1	Live	48	47	55	54	51	1020000	3000000	5100000	98.5507	0	0.76509	19.131
			Dead	2	0	1	0	0.75
			Red	0	0	0	0	0
Dec 7 2021	189	10% FBS R1	Live	51	56	45	59	52.75	1055000	3000000	5275000	97.6852	1.4218	0.813736	19.9448
			Dead	1	2	1	1	1.25
			Red	1	1	1	0	0.75
Dec 14 2021	196	10% FBS R1	Live	44	64	53	56	54.25	1085000	3000000	5425000	98.19	1.38249	0.854165	20.7989
			Dead	1	1	1	1	1
			Red	0	0	0	3	0.75
Dec 21 2021	203	10% FBS R1	Live	78	98	85	88	87.25	1745000	3000000	8725000	98.5876	0	1.5393	22.3382
			Dead	2	1	1	1	1.25
			Red	0	0	0	0	0
Dec 28 2021	210	10% FBS R1	Live	59	69	64	58	62.5	1250000	3000000	6250000	98.0392	0	1.05828	23.3965
			Dead	1	2	0	2	1.25
			Red	0	0	0	0	0
Jan 3 2022	216	10% FBS R1	Live	55	67	56	66	61	1220000	3000000	6100000	97.2112	2.04918	1.02325	23.3615
			Dead	2	4	0	1	1.75
			Red	3	1	0	1	1.25
Jan 10 2022	223	10% FBS R1	Live	102	96	87	73	89.5	1790000	3000000	8950000	99.7214	1.95531	1.57601	24.9725
			Dead	1	0	0	0	0.25
			Red	1	0	4	2	1.75
Jan 18 2022	230	10% FBS R1	Live	110	88	91	94	95.75	1915000	3000000	9575000	100	2.61097	1.67334	25.0348
			Dead	0	0	0	0	0
			Red	3	2	2	3	2.5
Jan 24 2022	236	10% FBS R1	Live	73	71	83	68	73.75	1475000	3000000	7375000	99.6622	1.69492	1.29693	26.3318
			Dead	0	0	0	1	0.25
			Red	4	0	0	1	1.25
Feb 1 2022	243	10% FBS R1	Live	76	72	64	80	73	1460000	3000000	7300000	100	6.16438	1.28219	27.6139
			Dead	0	0	0	0	0
			Red	4	6	5	3	4.5
Feb 7 2022	250	10% FBS R1	Live	113	106	121	116	114	2280000	3000000	11400000	100	1.97368	1.92488	29.5388
			Dead	0	0	0	0	0
			Red	1	1	3	4	2.25
2022-02-14	257	10% FBS R1	Live	73	78	114	73	84.5	1690000	3000000	8450000	99.4118	3.25444	1.49312	31.032
			Dead	0	1	0	1	0.5
			Red	1	5	3	2	2.75
2022-02-22	264	10% FBS R1	Live	62	76	85	79	75.5	1510000	3000000	7550000	99.67	0.662252	1.33074	32.3627
			Dead	0	1	0	0	0.25
			Red	2	0	0	0	0.5
2022-02-28	270	10% FBS R1	Live	41	54	48	55	49.5	990000	3000000	4950000	99.4975	0.505051	0.722047	33.0847
			Dead	0	0	1	0	0.25
			Red	0	0	1	0	0.25
2022-03-07	277	10% FBS R1	Live	72	65	54	80	67.75	1355000	3000000	6775000	98.9051	0	1.17458	34.2593
			Dead	2	0	0	1	0.75
			Red	0	0	0	0	0
2022-03-14	284	10% FBS R1	Live	244	224	232	292	248	4960000	3000000	24800000	98.4127	0	3.04554	37.3049
			Dead	4	4	4	4	4
			Red	0	0	0	0	0
2022-03-22	291	10% FBS R1	Live	304	352	292	276	306	6120000	3000000	30600000	98.3923	0	3.34855	40.6534
			Dead	4	0	8	8	5
			Red	0	0	0	0	0
2022-03-29	299	10% FBS R1	Live	117	125	112	158	128	2560000	3000000	12800000	96.7864	0	2.09189	42.7453
			Dead	3	7	4	3	4.25
			Red	0	0	0	0	0
2022-04-02	306	10% FBS R1	Live	127	121	137	101	121.5	2430000	3000000	12150000	98.1818	0.205761	2.01675	44.7621
			Dead	1	1	4	3	2.25
			Red	0	1	0	0	0.25
2022-04-11	313	10% FBS R1	Live	93	80	94	89	89	1780000	3000000	8900000	97.5342	0.280899	1.56793	46.33
			Dead	1	1	1	6	2.25
			Red	0	0	1	0	0.25
2022-04-18	320	10% FBS R1	Live	288	288	208	236	255	5100000	3000000	25500000	91.7266	0	3.08567	49.4157
			Dead	16	24	36	16	23
			Red	0	0	0	0	0
2022-04-25	327	10% FBS R1	Live	236	200	300	220	239	4780000	3000000	23900000	86.2816	0.41841	2.99224	52.4079
			Dead	44	36	44	28	38
			Red	0	0	4	0	1
2022-05-02	334	10% FBS R1	Live	188	201	247	212	212	10600000	3000000	53000000	84.5464	0	4.14055	56.5484	Note that the dilution for cell counting was changed to 5X instead of 2X due to vigorous growth of cells
			Dead	43	50	32	30	38.75
			Red	0	0	0	0	0
2022-05-06	338	10% FBS R1	Live	360	200	292	260	278	13900000	3000000	69500000	77.2222	0	4.53135	61.0798
			Dead	88	88	68	84	82
			Red	0	0	0	0	0
2022-05-11	343	10% FBS R1	Live	150	123	136	140	137.25	6862500	3000000	34312500	94.8187	0.728597	3.51366	64.5935
			Dead	7	5	10	8	7.5
			Red	0	0	0	0	1
2022-05-16	348	10% FBS R1	Live	87	101	58	110	89	4450000	3000000	22250000	95.4424	0	2.88909	67.4825
			Dead	5	5	5	2	4.25
			Red	0	0	0	0	0
2022-05-23	355	10% FBS R1	Live	167	146	164	198	168.75	8437500	3000000	42187500	97.2622	0.148148	3.81157	71.2941
			Dead	4	5	5	5	4.75
			Red	0	0	1	0	0.25
2022-05-31	363	10% FBS R1	Live	202	237	212	183	208.5	8340000	3000000	41700000	94.8805	0	3.79481	75.0889
			Dead	12	14	7	12	11.25
			Red	0	0	0	0	0
2022-06-06	369	10% FBS R1	Live	236	240	240	316	258	12900000	3000000	64500000	91.4894	0	4.4237	79.5126
			Dead	28	32	32	4	24
			Red	0	0	0	0	0
2022-06-09	372	10% FBS R1	Live	165	161	157	127	152.5	7625000	3000000	38125000	92.2844	0	3.66557	83.1782
			Dead	12	19	12	8	12.75
			Red	0	0	0	0	0
2022-06-13	376	10% FBS R1	Live	214	186	169	203	193	9650000	3000000	48250000	90.1869	0.129534	4.00517	87.1834
			Dead	21	24	20	19	21
			Red	1	0	0	0	0.25
2022-06-20	383	10% FBS R1	Live	66	73	74	56	67.25	3362500	3000000	16812500	97.8182	0	2.48506	89.6684
			Dead	2	2	1	1	1.5
			Red	0	0	0	0	0
2022-06-28	390	10% FBS R1	Live	63	59	67	84	68.25	3412500	3000000	17062500	98.913	0	2.50634	92.1748
			Dead	0	1	0	2	0.75
			Red	0	0	0	0	0
2022-07-05	398	10% FBS R1	Live	456	360	396	400	403	20150000	3000000	100750000	94.6009	0	5.06673	97.2415
			Dead	12	16	44	20	23
			Red	0	0	0	0	0
2022-07-11	404	10% FBS R1	Live	444	380	428	368	405	20250000	3000000	101250000	87.6623	0	5.07387	102.315
			Dead	56	48	56	68	57
			Red	0	0	0	0	0
2022-07-18	411	10% FBS R1	Live	214	216	230	239	224.75	11237500	3000000	56187500	81.9508	0	4.22476	106.54
			Dead	51	36	49	62	49.5
			Red	0	0	0	0	0
2022-07-26	418	10% FBS R1	Live	117	99	123	98	109.25	5462500	3000000	27312500	87.2255	0	3.18468	109.725
			Dead	11	13	20	20	16
			Red	0	0	0	0	0
2022-08-02	425	10% FBS R1	Live	52	60	68	62	60.5	3025000	3000000	15125000	100	0	2.33255	112.057
			Dead	0	0	0	0	0
			Red	0	0	0	0	0
2022-08-09	432	10% FBS R1	Live	55	59	48	43	51.25	2562500	3000000	12812500	97.619	0	2.0933	114.151
			Dead	0	3	2	0	1.25
			Red	0	0	0	0	0
2022-08-16	439	10% FBS R1	Live	99	89	107	80	93.75	4687500	3000000	23437500	98.1675	0	2.96406	117.115
			Dead	1	2	0	4	1.75
			Red	0	0	0	0	0
2022-08-22	445	10% FBS R1	Live	101	125	120	101	111.75	5587500	3000000	27937500	98.0263	0	3.2173	120.332
			Dead	1	4	2	2	2.25
			Red	0	0	0	0	0
2022-08-29	452	10% FBS R1	Live	157	139	153	149	149.5	7475000	3000000	37375000	97.2358	0	3.63693	123.969
			Dead	3	3	6	5	4.25
			Red	0	0	0	0	0
2022-09-06	460	10% FBS R1	Live	388	440	296	340	366	18300000	3000000	91500000	95.0649	0	4.92788	128.897
			Dead	24	12	24	16	19
			Red	0	0	0	0	0
2022-09-12	466	10% FBS R1	Live	214	236	317	237	251	12550000	3000000	62750000	94.5386	0	4.38404	133.281
			Dead	17	20	11	10	14.5
			Red	0	0	0	0	0
2022-09-19	473	10% FBS R1	Live	272	198	296	308	268.5	13425000	3000000	67125000	92.7461	0.0931099	4.48121	137.762
			Dead	14	27	29	14	21
			Red	0	0	0	1	0.25
2022-09-26	480	10% FBS R1	Live	388	380	324	368	365	18250000	3000000	91250000	92.1717	0	4.92393	142.686
			Dead	24	32	28	40	31
			Red	0	0	0	0	0
2022-10-03	487	10% FBS R1	Live	336	304	296	284	305	15250000	3000000	76250000	89.9705	0	4.66499	147.351
			Dead	24	32	40	40	34
			Red	0	0	0	0	0
2022-10-10	494	10% FBS R1	Live	328	296	236	340	300	15000000	3000000	75000000	91.7431	0	4.64116	151.992
			Dead	16	20	32	40	27
			Red	0	0	0	0	0
2022-10-17	501	10% FBS R1	Live	272	288	205	242	251.75	12587500	3000000	62937500	93.2407	0	4.38834	156.38
			Dead	12	14	26	21	18.25
			Red	0	0	0	0	0
2022-10-24	508	10% FBS R1	Live	408	396	392	460	414	20700000	3000000	103500000	90.7895	0	5.10556	161.486
			Dead	28	44	40	56	42
			Red	0	0	0	0	0
2022-10-31	515	10% FBS R1	Live	512	416	376	488	448	22400000	3000000	112000000	89.0656	0	5.21936	166.705
			Dead	44	48	80	48	55
			Red	0	0	0	0	0
2022-11-07	522	10% FBS R1	Live	408	460	428	468	441	22050000	3000000	110250000	85.9649	0	5.19665	171.902
			Dead	60	60	96	72	72
			Red	0	0	0	0	0
2022-11-14	529	10% FBS R1	Live	208	244	304	208	241	12050000	3000000	60250000	88.2784	0	4.32541	176.227
			Dead	28	36	36	28	32
			Red	0	0	0	0	0
2022-11-21	536	10% FBS R1	Live	236	172	204	228	210	10500000	3000000	52500000	91.3043	0	4.12689	180.354
			Dead	16	8	16	40	20
			Red	0	0	0	0	0
2022-11-28	543	10% FBS R1	Live	328	424	432	308	373	18650000	3000000	93250000	96.3824	0	4.95519	185.31
			Dead	24	4	12	16	14
			Red	0	0	0	0	0
2022-12-05	550	10% FBS R1	Live	384	372	428	348	383	19150000	3000000	95750000	98.5209	0	4.99334	190.303
			Dead	5	4	3	11	5.75
			Red	0	0	0	0	0
2022-12-12	557	10% FBS R1	Live	264	200	207	203	218.5	10925000	3000000	54625000	94.6912	0	4.1841	194.487
			Dead	16	9	11	13	12.25
			Red	0	0	0	0	0
2022-12-19	564	10% FBS R1	Live	102	110	101	125	109.5	5475000	3000000	27375000	90.8714	0	3.18797	197.675
			Dead	6	11	7	20	11
			Red	0	0	0	0	0
2022-12-27	572	10% FBS R1	Live	88	99	83	94	91	4550000	3000000	22750000	94.0568	0	2.92114	200.596
			Dead	6	5	5	7	5.75
			Red	0	0	0	0	0
2023-01-03	578	10% FBS R1	Live	396	412	424	348	395	19750000	3000000	98750000	93.7129	0	5.03782	205.634
			Dead	16	32	30	28	26.5
			Red	0	0	0	0	0
2023-01-09	584	10% FBS R1	Live	224	300	224	244	248	12400000	3000000	62000000	91.1765	0	4.3667	210.001
			Dead	24	60	4	8	24
			Red	0	0	0	0	0
2023-01-12	587	10% FBS R1	Live	356	336	372	400	366	18300000	3000000	91500000	89.4866	0	4.92788	214.928
			Dead	44	52	32	44	43
			Red	0	0	0	0	0
2023-01-17	592	10% FBS R1	Live	552	520	540	620	558	27900000	3000000	139500000	93	0	5.53594	220.464
			Dead	40	44	28	56	42
			Red	0	0	0	0	0
2023-01-23	598	10% FBS R1	Live	384	556	456	460	464	23200000	3000000	116000000	89.4027	0	5.26996	225.734
			Dead	60	32	56	72	55
			Red	0	0	0	0	0
2023-01-31	606	10% FBS R1	Live	292	320	264	260	284	14200000	3000000	71000000	86.5854	0	4.56214	230.297
			Dead	36	32	60	48	44
			Red	0	0	0	0	0
2023-02-06	612	10% FBS R1	Live	272	224	236	212	236	11800000	3000000	59000000	93.6508	0	4.29519	234.592
			Dead	8	24	8	24	16
			Red	0	0	0	0	0
2023-02-13	619	10% FBS R1	Live	174	124	155	147	150	7500000	3000000	37500000	93.0233	0	3.64174	238.233
			Dead	9	13	12	11	11.25
			Red	0	0	0	0	0
2023-02-20	626	10% FBS R1	Live	195	159	159	158	167.75	8387500	3000000	41937500	97.1056	0	3.803	242.036
			Dead	4	6	5	5	5
			Red	0	0	0	0	0
2023-02-27	633	10% FBS R1	Live	94	119	116	96	106.25	2125000	3000000	10625000	98.6079	0	1.82337	243.86	Note that we changed to a 2X dilution instead of a 5X dilution for cell counting
			Dead	1	2	2	1	1.5
			Red	0	0	0	0	0
2023-03-06	640	10% FBS R1	Live	364	452	420	346	395.5	7910000	3000000	39550000	99.8737	0	3.71848	247.578
			Dead	0	1	1	0	0.5
			Red	0	0	0	0	0
2023-03-13	647	10% FBS R1	Live	198	189	170	209	191.5	3830000	3000000	19150000	98.2051	0	2.67276	250.251
			Dead	3	3	4	4	3.5
			Red	0	0	0	0	0
2023-03-20	654	10% FBS R1	Live	178	187	141	171	169.25	3385000	3000000	16925000	97.974	0	2.49467	252.746
			Dead	2	2	5	5	3.5
			Red	0	0	0	0	0
2023-03-27	661	10% FBS R1	Live	170	186	200	184	185	3700000	3000000	18500000	95.8549	0	2.62297	255.369
			Dead	6	6	8	12	8
			Red	0	0	0	0	0
2023-04-03	668	10% FBS R1	Live	183	213	189	188	193.25	3865000	3000000	19325000	96.8672	0	2.68587	258.055
			Dead	5	4	6	10	6.25
			Red	0	0	0	0	0
2023-04-10	675	10% FBS R1	Live	170	169	149	141	157.25	3145000	3000000	15725000	96.3247	0	2.38864	260.443
			Dead	3	8	6	7	6
			Red	0	0	0	0	0
2023-04-17	682	10% FBS R1	Live	108	109	84	105	101.5	2030000	3000000	10150000	97.8313	0	1.75742	262.201
			Dead	3	2	1	3	2.25
			Red	0	0	0	0	0
2023-04-24	689	10% FBS R1	Live	164	133	141	154	148	2960000	3000000	14800000	96.5742	0	2.30123	264.502
			Dead	2	7	8	4	5.25
			Red	0	0	0	0	0
2023-05-01	696	10% FBS R1	Live	125	102	123	134	121	2420000	3000000	12100000	95.6522	0	2.0108	266.513
			Dead	4	4	7	7	5.5
			Red	0	0	0	0	0
2023-05-08	703	10% FBS R1	Live	135	150	121	163	142.25	2845000	3000000	14225000	95.7912	0	2.24409	268.757
			Dead	4	7	8	6	6.25
			Red	0	0	0	0	0
2023-05-15	710	10% FBS R1	Live	107	106	109	103	106.25	2125000	3000000	10625000	95.7207	0	1.82337	270.58
			Dead	4	3	6	6	4.75
			Red	0	0	0	0	0
2023-05-22	717	10% FBS R1	Live	170	162	180	182	173.5	3470000	3000000	17350000	94.2935	0	2.53043	273.111
			Dead	15	9	11	7	10.5
			Red	0	0	0	0	0
2023-05-29	724	10% FBS R1	Live	156	148	141	154	149.75	2995000	3000000	14975000	94.3307	0	2.31818	275.429
			Dead	9	9	7	11	9
			Red	0	0	0	0	0
2023-06-05	731	10% FBS R1	Live	124	111	102	94	107.75	2155000	3000000	10775000	96.8539	0	1.84358	277.272
			Dead	4	5	2	3	3.5
			Red	0	0	0	0	0
2023-06-12	738	10% FBS R1	Live	512	248	236	304	325	6500000	3000000	32500000	93.6599	0	3.43541	280.708
			Dead	16	24	12	36	22
			Red	0	0	0	0	0
2023-06-19	745	10% FBS R1	Live	63	63	73	73	68	2720000	3000000	13600000	79.0698	0	2.17931	282.887
			Dead	14	17	20	21	18
			Red	0	0	0	0	0
2023-06-26	752	10% FBS R1	Live	59	58	56	53	56.5	2260000	3000000	11300000	95.7627	0	1.91218	284.799
			Dead	2	3	2	3	2.5
			Red	0	0	0	0	0
2023-07-05	761	10% FBS R1	Live	79	49	58	45	57.75	2310000	3000000	11550000	98.2979	0	1.94373	286.743
			Dead	1	2	0	1	1
			Red	0	0	0	0	0
2023-07-10	766	10% FBS R1	Live	59	53	54	68	58.5	2340000	3000000	11700000	95.9016	0	1.96233	288.705
			Dead	1	2	4	3	2.5
			Red	0	0	0	0	0
2023-07-17	773	10% FBS R1	Live	179	177	147	177	170	6800000	3000000	34000000	96.3173	0	3.50047	292.206
			Dead	6	7	8	5	6.5
			Red	0	0	0	0	0
2023-07-24	780	10% FBS R1	Live	82	74	54	72	70.5	2820000	3000000	14100000	92.7632	0	2.23136	294.437
			Dead	6	3	6	7	5.5
			Red	0	0	0	0	0
2023-07-31	787	10% FBS R1	Live	80	76	106	77	84.75	3390000	3000000	16950000	89.4459	0	2.4968	296.934
			Dead	7	12	14	7	10
			Red	0	0	0	0	0
2023-08-07	794	10% FBS R1	Live	82	93	72	73	80	3200000	3000000	16000000	88.1543	0	2.41364	299.348
			Dead	15	11	9	8	10.75
			Red	0	0	0	0	0
2023-08-14	801	10% FBS R1	Live	45	39	31	31	36.5	1460000	3000000	7300000	86.3905	0	1.28219	300.63
			Dead	5	3	8	7	5.75
			Red	0	0	0	0	0
2023-08-21	808	10% FBS R1	Live	61	65	79	65	67.5	2700000	3000000	13500000	86.8167	0	2.16867	302.798
			Dead	10	10	12	9	10.25
			Red	0	0	0	0	0
2023-08-28	815	10% FBS R1	Live	96	96	80	93	91.25	3650000	3000000	18250000	87.7404	0	2.60335	305.402
			Dead	9	12	16	14	12.75
			Red	0	0	0	0	0
2023-09-05	823	10% FBS R1	Live	129	104	118	124	118.75	4750000	3000000	23750000	90.4762	0	2.98316	308.385
			Dead	10	14	10	16	12.5
			Red	0	0	0	0	0
2023-09-11	829	10% FBS R1	Live	42	53	48	31	43.5	1740000	3000000	8700000	91.0995	0	1.53516	309.92
			Dead	4	4	4	5	4.25
			Red	0	0	0	0	0
2023-09-18	836	10% FBS R1	Live	65	60	55	59	59.75	2390000	3000000	11950000	94.0945	0	1.99282	311.913
			Dead	4	4	3	4	3.75
			Red	0	0	0	0	0
2023-09-25	843	10% FBS R1	Live	66	50	45	49	52.5	1050000	3000000	5250000	95.0226	0	0.806886	312.72
			Dead	3	3	1	4	2.75
			Red	0	0	0	0	0
2023-10-02	850	10% FBS R1	Live	41	42	50	41	43.5	870000	3000000	4350000	91.0995	0	0.535742	313.256
			Dead	5	4	3	5	4.25
			Red	0	0	0	0	0
2023-10-09	857	10% FBS R1	Live	135	142	184	167	157	3140000	3000000	15700000	96.7643	0	2.38634	315.642
			Dead	5	6	6	4	5.25
			Red	0	0	0	0	0
2023-10-16	864	10% FBS R1	Live	55	72	58	51	59	1180000	3000000	5900000	95.935	0	0.975186	316.617
			Dead	2	3	1	4	2.5
			Red	0	0	0	0	0
2023-10-23	871	10% FBS R1	Live	104	96	112	84	99	1980000	3000000	9900000	97.2973	0	1.72147	318.339
			Dead	3	4	3	1	2.75
			Red	0	0	0	0	0
2023-10-30	878	10% FBS R1	Live	102	112	121	118	113.25	2265000	3000000	11325000	97.0021	0	1.91536	320.254
			Dead	7	2	3	2	3.5
			Red	0	0	0	0	0
2023-11-06	885	10% FBS R1	Live	111	100	117	122	112.5	2250000	3000000	11250000	96.3597	0	1.90578	322.16
			Dead	6	5	4	2	4.25
			Red	0	0	0	0	0
2023-11-13	892	10% FBS R1	Live	70	91	67	89	79.25	1585000	3000000	7925000	97.2393	0	1.40064	323.56
			Dead	2	3	1	3	2.25
			Red	0	0	0	0	0
2023-11-20	899	10% FBS R1	Live	62	70	66	70	67	1340000	3000000	6700000	98.1685	0	1.15853	324.719
			Dead	0	1	1	3	1.25
			Red	0	0	0	0	0
2023-11-27	906	10% FBS R1	Live	72	67	67	65	67.75	1355000	3000000	6775000	96.7857	0	1.17458	325.893
			Dead	3	4	0	2	2.25
			Red	0	0	0	0	0
2023-12-05	914	10% FBS R1	Live	210	205	198	202	203.75	4075000	3000000	20375000	96.9084	0.122699	2.76216	328.656
			Dead	5	6	8	7	6.5
			Red	0	1	0	0	0.25
2023-12-12	921	10% FBS R1	Live	123	102	128	121	118.5	2370000	3000000	11850000	91.1538	0	1.9807	330.636
			Dead	9	11	14	12	11.5
			Red	0	0	0	0	0
2023-12-19	928	10% FBS R1	Live	128	134	118	131	127.75	2555000	3000000	12775000	91.25	0	2.08908	332.725
			Dead	12	13	11	13	12.25
			Red	0	0	0	0	0
2023-12-26	935	10% FBS R1	Live	136	139	128	136	134.75	2695000	3000000	13475000	88.5057	0	2.16599	334.891
			Dead	17	18	15	20	17.5
			Red	0	0	0	0	0
2024-01-02	942	10% FBS R1	Live	84	97	101	102	96	1920000	3000000	9600000	94.8148	0	1.6771	336.568
			Dead	7	3	5	6	5.25
			Red	0	0	0	0	0
2024-01-09	949	10% FBS R1	Live	67	55	68	66	64	1280000	3000000	6400000	97.3384	0	1.09247	337.661
			Dead	1	2	1	3	1.75
			Red	0	0	0	0	0
2024-01-16	956	10% FBS R1	Live	180	171	173	184	177	3540000	3000000	17700000	92.549	0	2.55923	340.22
			Dead	16	14	12	15	14.25
			Red	0	0	0	0	0
2024-01-23	963	10% FBS R1	Live	68	61	73	65	66.75	1335000	3000000	6675000	95.6989	0	1.15314	341.373
			Dead	3	4	1	4	3
			Red	0	0	0	0	0
2024-01-30	970	10% FBS R1	Live	84	91	96	89	90	1800000	3000000	9000000	94.9868	0	1.58404	342.957
			Dead	3	7	5	4	4.75
			Red	0	0	0	0	0
2024-02-06	977	10% FBS R1	Live	137	140	129	132	134.5	2690000	3000000	13450000	91.3413	0	2.16332	345.121
			Dead	10	14	12	15	12.75
			Red	0	0	0	0	0
2024-02-13	984	10% FBS R1	Live	197	210	199	204	202.5	4050000	3000000	20250000	96.0854	0	2.75329	347.874
			Dead	9	11	6	7	8.25
			Red	0	0	0	0	0
2024-02-20	991	10% FBS R1	Live	111	115	125	129	120	2400000	3000000	12000000	96.9697	0	1.99884	349.873
			Dead	4	5	3	3	3.75
			Red	0	0	0	0	0
2024-02-27	998	10% FBS R1	Live	127	170	193	157	161.75	3235000	3000000	16175000	88.0272	0	2.42932	352.302
			Dead	19	23	20	26	22
			Red	0	0	0	0	0
2024-03-05	1005	10% FBS R1	Live	129	156	163	158	151.5	3030000	3000000	15150000	93.5185	0	2.33493	354.637
			Dead	9	11	9	13	10.5
			Red	0		0	0	0
2024-03-12	1012	10% FBS R1	Live	190	152	164	159	166.25	3325000	3000000	16625000	92.3611	0	2.46889	357.106
			Dead	13	17	9	16	13.75
			Red	0	0	0	0	0
2024-03-19	1019	10% FBS R1	Live	124	152	140	134	137.5	2750000	3000000	13750000	94.8276	0	2.19512	359.301
			Dead	6	6	8	10	7.5
			Red	0	0	0	0	0
2024-03-26	1026	10% FBS R1	Live	194	182	190	193	189.75	3795000	3000000	18975000	94.7566	0	2.65952	361.961
			Dead	12	9	11	10	10.5
			Red	0	0	0	0	0
2024-04-02	1033	10% FBS R1	Live	132	110	146	120	127	2540000	3000000	12700000	96.2121	0	2.08059	364.041
			Dead	4	7	6	3	5
			Red	0	0	0	0	0
2024-04-09	1040	10% FBS R1	Live	125	127	132	140	131	2620000	3000000	13100000	93.2384	0	2.1253	366.166
			Dead	10	7	9	12	9.5
			Red	0	0	0	0	0
2024-04-16	1047	10% FBS R1	Live	112	132	109	117	117.5	2350000	3000000	11750000	90.2111	0	1.96848	368.135
			Dead	12	15	14	10	12.75
			Red	0	0	0	0	0
2024-04-23	1054	10% FBS R1	Live	161	177	163	176	169.25	3385000	3000000	16925000	94.4212	0	2.49467	370.63
			Dead	13	7	11	9	10
			Red	0	0	0	0	0
2024-04-30	1061	10% FBS R1	Live	135	134	118	106	123.25	2465000	3000000	12325000	95.7282	0	2.03737	372.667
			Dead	4	7	3	8	5.5
			Red	0	0	0	0	0
2024-05-07	1068	10% FBS R1	Live	231	229	223	235	229.5	4590000	3000000	22950000	93.3876	0	2.93376	375.601
			Dead	12	20	15	18	16.25
			Red	0	0	0	0	0
2024-05-14	1075	10% FBS R1	Live	160	124	149	154	146.75	2935000	3000000	14675000	91.5757	0	2.289	377.89
			Dead	12	14	16	12	13.5
			Red	0	0	0	0	0
2024-05-21	1082	10% FBS R1	Live	159	193	168	176	174	3480000	3000000	17400000	89.3453	0	2.53458	380.424
			Dead	18	23	26	16	20.75
			Red	0	0	0	0	0
2024-05-28	1089	10% FBS R1	Live	169	172	157	163	165.25	3305000	3000000	16525000	87.3184	0	2.46019	382.884
			Dead	17	30	26	23	24
			Red	0	0	0	0	0
2024-06-04	1096	10% FBS R1	Live	226	241	239	242	237	4740000	3000000	23700000	84.1171	0	2.98012	385.865
			Dead	46	31	50	52	44.75
			Red	0	0	0	0	0
2024-06-11	1103	10% FBS R1	Live	210	216	199	207	208	4160000	3000000	20800000	74.2857	0	2.79193	388.657
			Dead	75	64	78	71	72
			Red	0	0	0	0	0
2024-06-18	1110	10% FBS R1	Live	161	157	153	147	154.5	3090000	3000000	15450000	89.3064	0	2.3632	391.02
			Dead	19	17	25	13	18.5
			Red	0	0	0	0	0
2024-06-25	1117	10% FBS R1	Live	133	132	140	129	133.5	2670000	3000000	13350000	96.3899	0	2.15256	393.172
			Dead	4	7	4	5	5
			Red	0	0	0	0	0
2024-07-02	1124	10% FBS R1	Live	154	149	147	151	150.25	3005000	3000000	15025000	97.4068	0	2.32298	395.495
			Dead	4	3	4	5	4
			Red	0	0	0	0	0
2024-07-09	1131	10% FBS R1	Live	202	249	267	288	251.5	5030000	3000000	25150000	93.4076	0	3.06574	398.561
			Dead	22	8	14	27	17.75
			Red	0	0	0	0	0
2024-07-16	1138	10% FBS R1	Live	86	109	94	93	95.5	1910000	3000000	9550000	95.7393	0	1.66957	400.231
			Dead	3	6	2	6	4.25
			Red	0	0	0	0	0
2024-07-23	1145	10% FBS R1	Live	117	131	122	118	122	2440000	3000000	12200000	95.3125	0	2.02267	402.253
			Dead	2	5	8	9	6
			Red	0	0	0	0	0

## Sheet: 15%FBS
Table S4 – Growth and viability of L. variegatus embryonic cells - cultured in Urchin Media with 15% FBS
Date	Experiment Day	Media	Cell state	Cell Counts (hemocytometer)				Average cell counts	Cells/ml	Number cells seeded	Total cells	Viability % live cells	% Red cells	Pop doubling	Cumulative population doubling
				Ch1	Ch2	Ch3	Ch4
Lv Blastula Cell Culture in Urchin Media (UM) with 15% FBS
June 4 2021	3	15% FBS R1	Live	67	65	66	79	69.25	1385000	1290000	6925000	98.9286	0	2.42304	2.42
			Dead	1	0	1	1	0.75
			Red	0	0	0	0	0
June 8 2021	7	15% FBS R1	Live	62	75	77	76	72.5	1450000	3000000	7250000	99.6564	0	1.27228	3.69228
			Dead	0	1	0	0	0.25
			Red	0	0	0	0	0
June 11 2021	10	15% FBS R1	Live	50	34	42	44	42.5	850000	3000000	4250000	98.2659	0	0.502209	4.19449
			Dead	1	1	0	1	0.75
			Red	0	0	0	0	0
June 15 2021	14	15% FBS R1	Live	32	31	47	39	37.25	745000	3000000	3725000	100	0	0.312097	4.50658
			Dead	0	0	0	0	0
			Red	0	0	0	0	0
June 22 2021	21	15% FBS R1	Live	64	54	76	52	61.5	1230000	3000000	6150000	95.3488	0	1.03502	5.54161
			Dead	3	3	3	3	3
			Red	0	0	0	0	0
June 29 2021	28	15% FBS R1	Live	65	57	76	66	66	1320000	3000000	6600000	96.3504	1.51515	1.13684	6.67845
			Dead	2	3	2	3	2.5
			Red	2	0	1	1	1
July 6 2021	35	15% FBS R1	Live	46	38	52	49	46.25	925000	3000000	4625000	96.3542	3.24324	0.624128	7.30258
			Dead	1	2	2	2	1.75
			Red	1	2	3	0	1.5
July 13 2021	42	15% FBS R1	Live	51	38	52	45	46.5	930000	3000000	4650000	93.9394	3.76344	0.631901	7.93448
			Dead	3	2	3	4	3
			Red	4	0	2	1	1.75
July 20 2021	49	15% FBS R1	Live	58	40	44	52	48.5	970000	3000000	4850000	97	6.18557	0.69262	8.6271
			Dead	1	2	1	2	1.5
			Red	4	3	2	3	3
July 27 2021	56	15% FBS R1	Live	38	24	40	51	38.25	765000	3000000	3825000	93.865	5.88235	0.350294	8.97739
			Dead	2	3	1	4	2.5
			Red	0	1	3	5	2.25
Aug 3 2021	63	15% FBS R1	Live	43	54	51	45	48.25	965000	3000000	4825000	93.2367	10.3627	0.685169	9.66256
			Dead	3	4	5	2	3.5
			Red	5	3	6	6	5
Aug 10 2021	70	15% FBS R1	Live	41	40	42	51	43.5	870000	3000000	4350000	96.6667	14.3678	0.535742	10.1983
			Dead	1	1	2	2	1.5
			Red	6	6	9	4	6.25
Aug 17 2021	77	15% FBS R1	Live	49	42	39	58	47	940000	3000000	4700000	97.4093	18.617	0.647322	10.8456
			Dead	3	1	0	1	1.25
			Red	10	8	4	13	8.75
Aug 26 2021	86	15% FBS R1	Live	212	204	204	220	210	4200000	3000000	21000000	98.5915	2.61905	2.80573	13.6514
			Dead	3	2	4	3	3
			Red	6	4	5	7	5.5
Sept 7 2021	98	15% FBS R1	Live	46	39	44	46	43.75	875000	3000000	4375000	94.5946	9.71429	0.544005	14.1954
			Dead	1	3	3	3	2.5
			Red	2	7	4	4	4.25
Sept 14 2021	105	15% FBS R1	Live	45	43	45	42	43.75	875000	3000000	4375000	93.5829	1.14286	0.544005	14.7394
			Dead	3	2	3	4	3
			Red	0	1	1	0	0.5
Sept 21 2021	112	15% FBS R1	Live	73	70	65	77	71.25	1425000	3000000	7125000	98.9583	3.50877	1.2472	15.9866	reseeded 6 million cells on 2 flasks
			Dead	1	1	1	0	0.75
			Red	1	4	3	2	2.5
Sept 28 2021	119	15% FBS R1	Live	56	54	38	70	54.5	1090000	6000000	10900000	100	1.83486	0.860794	16.8474	reseeded 6 million cells on 2 flasks
			Dead	0	0	0	0	0
			Red	1	0	3	0	1
Oct 5 2021	126	15% FBS R1	Live	57	44	61	62	56	1120000	6000000	11200000	98.6784	0	0.899942	17.7473	reseeded 6 million cells on 2 flasks
			Dead	1	1	1	0	0.75
			Red	0	0	0	0	0
Oct 12 2021	133	15% FBS R1	Live	36	40	47	43	41.5	830000	6000000	8300000	96.5116	0.60241	0.467877	18.2152	reseeded 6 million cells on 2 flasks
			Dead	1	3	1	1	1.5
			Red	0	1	0	0	0.25
Oct 19 2021	140	15% FBS R1	Live	41	41	54	50	46.5	930000	6000000	9300000	98.9362	0.537634	0.631901	18.8471	reseeded 6 million cells on 2 flasks
			Dead	1	0	0	1	0.5
			Red	1	0	0	0	0.25
Oct 26 2021	147	15% FBS R1	Live	33	36	41	31	35.25	705000	6000000	7050000	97.2414	0.70922	0.232526	19.0796	reseeded 6 million cells on 2 flasks
			Dead	2	1	0	1	1
			Red	0	0	1	0	0.25
Nov 2 2021	154	15% FBS R1	Live	84	86	90	78	84.5	1690000	6000000	16900000	98.8304	1.18343	1.49312	20.5727	reseeded 6 million cells on 2 flasks
			Dead	1	2	0	1	1
			Red	2	1	0	1	1
Nov 9 2021	161	15% FBS R1	Live	89	89	102	102	95.5	1910000	6000000	19100000	98.9637	1.57068	1.66957	22.2423
			Dead	0	1	1	2	1
			Red	0	1	1	4	1.5
Nov 17 2021	169	15% FBS R1	Live	51	65	74	62	63	1260000	3000000	6300000	98.8235	0.793651	1.06977	23.3121
			Dead	0	1	2	0	0.75
			Red	0	0	1	1	0.5
Nov 23 2021	175	15% FBS R1	Live	63	71	60	68	65.5	1310000	3000000	6550000	99.6198	0	1.12588	24.4379
			Dead	1	0	0	0	0.25
			Red	0	0	0	0	0
Nov 30 2021	182	15% FBS R1	Live	47	49	47	47	47.5	950000	3000000	4750000	98.9583	1.05263	0.66258	25.1005
			Dead	1	0	0	1	0.5
			Red	0	0	2	0	0.5
Dec 7 2021	189	15% FBS R1	Live	53	74	65	73	66.25	1325000	3000000	6625000	98.513	1.13208	1.14229	26.2428
			Dead	1	2	1	0	1
			Red	0	1	1	1	0.75
Dec 14 2021	196	15% FBS R1	Live	94	72	63	84	78.25	1565000	3000000	7825000	99.0506	0.958466	1.38233	27.6251
			Dead	1	2	0	0	0.75
			Red	0	1	2	0	0.75
Dec 21 2021	203	15% FBS R1	Live	95	112	85	104	99	1980000	3000000	9900000	98.5075	0.505051	1.72147	29.3466
			Dead	3	0	1	2	1.5
			Red	1	1	0	0	0.5
Dec 28 2021	210	15% FBS R1	Live	88	99	94	89	92.5	1850000	3000000	9250000	98.4043	0.27027	1.62355	30.9702
			Dead	1	3	1	1	1.5
			Red	0	1	0	0	0.25
Jan 3 2022	216	15% FBS R1	Live	38	51	43	44	44	880000	3000000	4400000	100	2.27273	0.55222	31.5224
			Dead	0	0	0	0	0
			Red	0	2	1	1	1
Jan 10 2022	223	15% FBS R1	Live	99	125	142	132	124.5	2490000	3000000	12450000	99.7996	1.00402	2.05192	33.5743
			Dead	0	0	0	1	0.25
			Red	0	2	2	1	1.25
Jan 18 2022	230	15% FBS R1	Live	116	115	134	119	121	2420000	3000000	12100000	99.7938	0.826446	2.0108	35.5851
			Dead	1	0	0	0	0.25
			Red	0	0	3	1	1
Jan 24 2022	236	15% FBS R1	Live	51	80	73	72	69	1380000	3000000	6900000	99.639	2.17391	1.20094	36.786
			Dead	0	1	0	0	0.25
			Red	3	1	0	2	1.5
Feb 1 2022	243	15% FBS R1	Live	108	93	109	100	102.5	2050000	3000000	10250000	100	1.46341	1.77156	38.5576
			Dead	0	0	0	0	0
			Red	1	0	3	2	1.5
2022-02-07	250	15% FBS R1	Live	130	126	114	120	122.5	2450000	3000000	12250000	99.7963	2.2449	2.02857	40.5862
			Dead	0	0	0	1	0.25
			Red	2	4	3	2	2.75
2022-02-14	257	15% FBS R1	Live	131	114	130	104	119.75	2395000	3000000	11975000	98.7629	2.71399	1.99583	42.582
			Dead	3	2	0	1	1.5
			Red	4	4	3	2	3.25
2022-02-22	264	15% FBS R1	Live	131	123	117	115	121.5	2430000	3000000	12150000	97.006	0.411523	2.01675	44.5988
			Dead	3	6	4	2	3.75
			Red	0	0	2	0	0.5
2022-02-28	270	15% FBS R1	Live	113	105	114	126	114.5	2290000	3000000	11450000	99.1342	0.655022	1.93119	46.5299
			Dead	0	1	0	3	1
			Red	1	0	1	1	0.75
2022-03-07	277	15% FBS R1	Live	99	75	106	94	93.5	1870000	3000000	9350000	99.4681	0.534759	1.63905	48.169
			Dead	1	0	1	0	0.5
			Red	0	2	0	0	0.5
2022-03-14	284	15% FBS R1	Live	150	129	130	148	139.25	2785000	3000000	13925000	98.7589	0	2.21336	50.3824
			Dead	2	3	2	0	1.75
			Red	0	0	0	0	0
2022-03-21	291	15% FBS R1	Live	141	137	175	165	154.5	3090000	3000000	15450000	98.5646	0	2.3632	52.7456
			Dead	1	3	3	2	2.25
			Red	0	0	0	0	0
2022-03-29	299	15% FBS R1	Live	235	340	316	232	280.75	5615000	3000000	28075000	98.4224	0.178094	3.22438	55.9699
			Dead	6	4	4	4	4.5
			Red	1	1	0	0	0.5
2022-04-02	306	15% FBS R1	Live	99	96	117	92	101	2020000	3000000	10100000	97.8208	0.49505	1.7503	57.7202
			Dead	4	4	0	1	2.25
			Red	0	2	0	0	0.5
2022-04-11	313	15% FBS R1	Live	91	74	106	84	88.75	1775000	3000000	8875000	99.7191	0.84507	1.56388	59.2841
			Dead	0	0	0	1	0.25
			Red	1	0	1	1	0.75
2022-04-18	320	15% FBS R1	Live	155	176	182	181	173.5	3470000	3000000	17350000	99.1429	0.288184	2.53043	61.8145
			Dead	2	3	1	0	1.5
			Red	1	0	1	0	0.5
2022-04-25	327	15% FBS R1	Live	119	118	131	113	120.25	2405000	3000000	12025000	98.364	0.2079	2.00184	63.8164
			Dead	3	1	2	2	2
			Red	1	0	0	0	0.25
2022-05-02	334	15% FBS R1	Live	225	230	260	243	239.5	4790000	3000000	23950000	98.2564	0	2.99525	66.8116
			Dead	4	6	3	4	4.25
			Red	0	0	0	0	0
2022-05-11	343	15% FBS R1	Live	171	141	151	155	154.5	3090000	3000000	15450000	98.2512	0	2.3632	69.1748
			Dead	2	2	3	4	2.75
			Red	0	0	0	0	0
2022-05-16	348	15% FBS R1	Live	91	72	97	80	85	1700000	3000000	8500000	99.7067	0	1.50163	70.6765
			Dead	0	0	0	1	0.25
			Red	0	0	0	0	0
2022-05-23	355	15% FBS R1	Live	143	110	135	131	129.75	2595000	3000000	12975000	99.4253	0.192678	2.11147	72.7879
			Dead	1	1	1	0	0.75
			Red	1	0	0	0	0.25
2022-05-31	363	15% FBS R1	Live	93	77	96	72	84.5	3380000	3000000	16900000	97.4063	0	2.49254	75.2805
			Dead	0	2	4	3	2.25
			Red	0	0	0	0	0
2022-06-06	369	15% FBS R1	Live	65	75	63	73	69	1380000	3000000	6900000	98.5714	1.44928	1.20094	76.4814
			Dead	0	1	2	1	1
			Red	0	1	0	3	1
2022-06-13	376	15% FBS R1	Live	72	106	89	100	91.75	1835000	3000000	9175000	98.9218	0.27248	1.61181	78.0932
			Dead	0	3	0	1	1
			Red	1	0	0	0	0.25
2022-06-20	383	15% FBS R1	Live	69	43	65	52	57.25	1145000	3000000	5725000	98.2833	0.436681	0.931772	79.025
			Dead	2	1	0	1	1
			Red	0	1	0	0	0.25
2022-06-28	390	15% FBS R1	Live	86	96	118	97	99.25	1985000	3000000	9925000	99.25	0	1.7251	80.7501
			Dead	1	0	0	2	0.75
			Red	0	0	0	0	0
2022-07-05	398	15% FBS R1	Live	384	360	380	388	378	7560000	3000000	37800000	96.9231	0.132275	3.65323	84.4033
			Dead	8	4	20	16	12
			Red	0	1	1	0	0.5
2022-07-11	404	15% FBS R1	Live	123	101	125	140	122.25	2445000	3000000	12225000	94.7674	0.204499	2.02562	86.429
			Dead	8	8	6	5	6.75
			Red	1	0	0	0	0.25
2022-07-18	411	15% FBS R1	Live	87	94	112	82	93.75	1875000	3000000	9375000	98.4252	0	1.6429	88.0719
			Dead	1	1	1	3	1.5
			Red	0	0	0	0	0
2022-07-26	418	15% FBS R1	Live	41	49	50	61	50.25	1005000	3000000	5025000	99.505	0.995025	0.743729	88.8156
			Dead	1	0	0	0	0.25
			Red	0	1	0	1	0.5
2022-08-02	425	15% FBS R1	Live	60	57	49	62	57	1140000	3000000	5700000	94.6058	0	0.925462	89.741
			Dead	3	4	2	4	3.25
			Red	0	0	0	0	0
2022-08-09	432	15% FBS R1	Live	141	130	157	169	149.25	2985000	3000000	14925000	99.3344	0	2.31335	92.0544
			Dead	0	2	1	1	1
			Red	0	0	0	0	0
2022-08-16	439	15% FBS R1	Live	147	108	129	130	128.5	2570000	3000000	12850000	100	0	2.09752	94.1519
			Dead	0	0	0	0	0
			Red	0	0	0	0	0
2022-08-22	445	15% FBS R1	Live	52	48	58	57	53.75	1075000	3000000	5375000	100	0	0.840814	94.9927
			Dead	0	0	0	0	0
			Red	0	0	0	0	0
2022-08-29	452	15% FBS R1	Live	225	101	99	107	133	2660000	3000000	13300000	99.8124	0	2.14714	97.1399
			Dead	0	1	0	0	0.25
			Red	0	0	0	0	0
2022-09-06	460	15% FBS R1	Live	156	149	150	154	152.25	3045000	3000000	15225000	99.8361	0.164204	2.34205	99.4819
			Dead	0	0	0	1	0.25
			Red	1	0	0	0	0.25
2022-09-12	466	15% FBS R1	Live	87	117	79	94	94.25	1885000	3000000	9425000	99.4723	0	1.65057	101.132
			Dead	2	0	0	0	0.5
			Red	0	0	0	0	0
2022-09-19	473	15% FBS R1	Live	120	107	106	100	108.25	2165000	3000000	10825000	98.6333	0	1.85026	102.983
			Dead	1	1	3	1	1.5
			Red	0	0	0	0	0
2022-09-26	480	15% FBS R1	Live	65	81	96	79	80.25	1605000	3000000	8025000	99.6894	0	1.41871	104.401
			Dead	1	0	0	0	0.25
			Red	0	0	0	0	0
2022-10-03	487	15% FBS R1	Live	131	150	158	148	146.75	2935000	3000000	14675000	99.6604	0	2.289	106.69
			Dead	0	2	0	0	0.5
			Red	0	0	0	0	0
2022-10-10	494	15% FBS R1	Live	49	47	43	40	44.75	895000	3000000	4475000	98.895	0	0.57659	107.267
			Dead	1	0	1	0	0.5
			Red	0	0	0	0	0
2022-10-17	501	15% FBS R1	Live	110	115	111	113	112.25	2245000	3000000	11225000	98.8987	0	1.90258	109.17
			Dead	0	2	2	1	1.25
			Red	0	0	0	0	0
2022-10-24	508	15% FBS R1	Live	129	152	143	155	144.75	2895000	3000000	14475000	99.4845	0	2.26921	111.439
			Dead	2	0	1	0	0.75
			Red	0	0	0	0	0
2022-10-31	515	15% FBS R1	Live	81	86	95	99	90.25	1805000	3000000	9025000	99.7238	0	1.58804	113.027
			Dead	1	0	0	0	0.25
			Red	0	0	0	0	0
2022-11-07	522	15% FBS R1	Live	87	89	94	85	88.75	1775000	3000000	8875000	99.162	0	1.56388	114.591
			Dead	0	3	0	0	0.75
			Red	0	0	0	0	0
2022-11-14	529	15% FBS R1	Live	71	86	74	70	75.25	1505000	3000000	7525000	99.3399	0	1.32596	115.917
			Dead	0	0	0	2	0.5
			Red	0	0	0	0	0
2022-11-21	536	15% FBS R1	Live	100	124	133	130	121.75	2435000	3000000	12175000	99.1853	0	2.01971	117.936
			Dead	2	0	2	0	1
			Red	0	0	0	0	0
2022-11-28	543	15% FBS R1	Live	228	244	192	256	230	4600000	3000000	23000000	100	0	2.93689	120.873
			Dead	0	0	0	0	0
			Red	0	0	0	0	0
2022-12-05	550	15% FBS R1	Live	173	197	165	194	182.25	3645000	3000000	18225000	99.0489	0	2.60137	123.475
			Dead	1	1	3	2	1.75
			Red	0	0	0	0	0
2022-12-12	557	15% FBS R1	Live	109	116	117	115	114.25	2285000	3000000	11425000	99.3478	0	1.92804	125.403
			Dead	1	0	2	0	0.75
			Red	0	0	0	0	0
2022-12-19	564	15% FBS R1	Live	113	111	121	143	122	2440000	3000000	12200000	97.6	0	2.02267	127.425
			Dead	2	2	6	2	3
			Red	0	0	0	0	0
2022-12-27	572	15% FBS R1	Live	56	57	62	62	59.25	1185000	3000000	5925000	94.4223	0	0.981283	128.407
			Dead	5	3	3	3	3.5
			Red	0	0	0	0	0
2023-01-03	578	15% FBS R1	Live	864	304	404	372	486	9720000	3000000	48600000	95.858	0	4.01559	132.422
			Dead	16	16	28	24	21
			Red	0	0	0	0	0
2023-01-09	584	15% FBS R1	Live	352	260	256	280	287	5740000	3000000	28700000	92.8803	0	3.25613	135.678
			Dead	24	20	24	20	22
			Red	0	0	0	0	0
2023-01-12	587	15% FBS R1	Live	216	234	257	235	235.5	4710000	3000000	23550000	93.8247	0	2.97097	138.649
			Dead	15	14	20	13	15.5
			Red	0	0	0	0	0
2023-01-17	592	15% FBS R1	Live	800	752	780	752	771	15420000	3000000	77100000	96.375	0	4.68098	143.33
			Dead	8	28	40	40	29
			Red	0	0	0	0	0
2023-01-23	598	15% FBS R1	Live	190	143	138	130	150.25	3005000	3000000	15025000	88.774	0	2.32298	145.653
			Dead	15	22	20	19	19
			Red	0	0	0	0	0
2023-01-31	606	15% FBS R1	Live	280	240	236	280	259	5180000	3000000	25900000	91.1972	0	3.10811	148.761
			Dead	24	16	24	36	25
			Red	0	0	0	0	0
2023-02-06	612	15% FBS R1	Live	94	153	118	109	118.5	2370000	3000000	11850000	94.0476	0	1.9807	150.742
			Dead	6	10	7	7	7.5
			Red	0	0	0	0	0
2023-02-13	619	15% FBS R1	Live	98	94	119	87	99.5	1990000	3000000	9950000	95.4436	0	1.72873	152.471
			Dead	2	7	6	4	4.75
			Red	0	0	0	0	0
2023-02-20	626	15% FBS R1	Live	204	188	192	216	200	4000000	3000000	20000000	98.1595	0	2.73538	155.206
			Dead	6	3	4	2	3.75
			Red	0	0	0	0	0
2023-02-27	633	15% FBS R1	Live	101	91	113	99	101	2020000	3000000	10100000	97.8208	0	1.7503	156.957
			Dead	2	4	1	2	2.25
			Red	0	0	0	0	0
2023-03-06	640	15% FBS R1	Live	428	460	392	448	432	8640000	3000000	43200000	99.8844	0	3.84576	160.802
			Dead	0	1	0	1	0.5
			Red	0	0	0	0	0
2023-03-13	647	15% FBS R1	Live	138	129	119	129	128.75	2575000	3000000	12875000	97.3535	0	2.10032	162.903
			Dead	2	3	3	6	3.5
			Red	0	0	0	0	0
2023-03-20	654	15% FBS R1	Live	198	177	208	199	195.5	3910000	3000000	19550000	97.995	0	2.70256	165.605
			Dead	2	3	6	5	4
			Red	0	0	0	0	0
2023-03-27	661	15% FBS R1	Live	139	124	144	142	137.25	2745000	3000000	13725000	96.6549	0	2.1925	167.798
			Dead	4	4	6	5	4.75
			Red	0	0	0	0	0
2023-04-03	668	15% FBS R1	Live	150	187	203	183	180.75	3615000	3000000	18075000	97.4394	0	2.58946	170.387
			Dead	2	2	6	9	4.75
			Red	0	0	0	0	0
2023-04-10	675	15% FBS R1	Live	147	165	165	155	158	3160000	3000000	15800000	96.1948	0	2.3955	172.783
			Dead	2	4	10	9	6.25
			Red	0	0	0	0	0
2023-04-17	682	15% FBS R1	Live	104	108	104	106	105.5	2110000	3000000	10550000	97.6852	0	1.81316	174.596
			Dead	2	2	4	2	2.5
			Red	0	0	0	0	0
2023-04-24	689	15% FBS R1	Live	118	139	127	132	129	2580000	3000000	12900000	96.8105	0	2.10312	176.699
			Dead	3	4	3	7	4.25
			Red	0	0	0	0	0
2023-05-01	696	15% FBS R1	Live	134	111	123	130	124.5	2490000	3000000	12450000	96.325	0	2.05192	178.751
			Dead	3	5	6	5	4.75
			Red	0	0	0	0	0
2023-05-08	703	15% FBS R1	Live	113	92	128	103	109	2180000	3000000	10900000	96.4602	0	1.86021	180.611
			Dead	7	3	4	2	4
			Red	0	0	0	0	0
2023-05-15	710	15% FBS R1	Live	50	55	61	58	56	1120000	3000000	5600000	96.5517	0	0.899942	181.511
			Dead	2	2	1	3	2
			Red	0	0	0	0	0
2023-05-22	717	15% FBS R1	Live	109	117	116	127	117.25	2345000	3000000	11725000	91.068	0	1.96541	183.476
			Dead	11	11	12	12	11.5
			Red	0	0	0	0	0
2023-05-29	724	15% FBS R1	Live	109	111	136	124	120	2400000	3000000	12000000	92.3077	0	1.99884	185.475
			Dead	6	11	15	8	10
			Red	0	0	0	0	0
2023-06-05	731	15% FBS R1	Live	70	73	88	61	73	1460000	3000000	7300000	97.01	0	1.28219	186.757
			Dead	3	2	1	3	2.25
			Red	0	0	0	0	0
2023-06-12	738	15% FBS R1	Live	201	242	197	186	206.5	4130000	3000000	20650000	92.3937	0	2.78149	189.539
			Dead	16	25	14	13	17
			Red	0	0	0	0	0
2023-06-19	745	15% FBS R1	Live	164	173	165	156	164.5	3290000	3000000	16450000	92.4157	0	2.45363	191.993
			Dead	12	13	11	18	13.5
			Red	0	0	0	0	0
2023-06-26	752	15% FBS R1	Live	162	138	160	157	154.25	3085000	3000000	15425000	93.3434	0	2.36087	194.353
			Dead	12	8	9	15	11
			Red	0	0	0	0	0
2023-07-05	761	15% FBS R1	Live	67	88	95	86	84	3360000	3000000	16800000	95.1841	0	2.48398	196.837
			Dead	3	4	6	4	4.25
			Red	0	0	0	0	0
2023-07-10	766	15% FBS R1	Live	86	67	94	80	81.75	3270000	3000000	16350000	94.7826	0	2.44484	199.282
			Dead	4	3	5	6	4.5
			Red	0	0	0	0	0
2023-07-17	773	15% FBS R1	Live	228	232	203	230	223.25	8930000	3000000	44650000	95.6103	0	3.89336	203.176
			Dead	12	10	9	10	10.25
			Red	0	0	0	0	0
2023-07-24	780	15% FBS R1	Live	134	145	156	145	145	5800000	3000000	29000000	90.3427	0	3.27112	206.447
			Dead	13	15	18	16	15.5
			Red	0	0	0	0	0
2023-07-31	787	15% FBS R1	Live	100	105	106	93	101	4040000	3000000	20200000	89.3805	0	2.74972	209.196
			Dead	14	14	11	9	12
			Red	0	0	0	0	0
2023-08-07	794	15% FBS R1	Live	116	92	102	91	100.25	4010000	3000000	20050000	83.0228	0	2.73898	211.935
			Dead	15	26	15	26	20.5
			Red	0	0	0	0	0
2023-08-14	801	15% FBS R1	Live	92	77	81	114	91	3640000	3000000	18200000	88.9976	0	2.59939	214.535
			Dead	9	11	11	14	11.25
			Red	0	0	0	0	0
2023-08-21	808	15% FBS R1	Live	99	83	103	99	96	3840000	3000000	19200000	86.6817	0	2.67652	217.211
			Dead	9	17	17	16	14.75
			Red	0	0	0	0	0
2023-08-28	815	15% FBS R1	Live	121	150	158	138	141.75	5670000	3000000	28350000	90.5751	0	3.23843	220.45
			Dead	10	14	23	12	14.75
			Red	0	0	0	0	0
2023-09-05	823	15% FBS R1	Live	174	164	155	176	167.25	6690000	3000000	33450000	89.6783	0	3.47695	223.927
			Dead	13	23	20	21	19.25
			Red	0	0	0	0	0
2023-09-11	829	15% FBS R1	Live	128	117	111	117	118.25	4730000	3000000	23650000	93.1102	0	2.97708	226.904
			Dead	8	7	7	13	8.75
			Red	0	0	0	0	0
2023-09-18	836	15% FBS R1	Live	130	125	115	120	122.5	4900000	3000000	24500000	95.5166	0	3.02799	229.932
			Dead	5	5	6	7	5.75
			Red	0	0	0	0	0
2023-09-25	843	15% FBS R1	Live	129	128	134	131	130.5	2610000	3000000	13050000	94.0541	0	2.11978	232.052
			Dead	6	5	13	9	8.25
			Red	0	0	0	0	0
2023-10-02	850	15% FBS R1	Live	122	100	129	125	119	2380000	3000000	11900000	95.5823	0	1.98677	234.038
			Dead	4	6	6	6	5.5
			Red	0	0	0	0	0
2023-10-09	857	15% FBS R1	Live	73	72	66	75	71.5	1430000	3000000	7150000	96.9492	0	1.25225	235.291
			Dead	3	1	2	3	2.25
			Red	0	0	0	0	0
2023-10-16	864	15% FBS R1	Live	111	116	104	120	112.75	2255000	3000000	11275000	95.5508	0	1.90898	237.2
			Dead	9	4	6	2	5.25
			Red	0	0	0	0	0
2023-10-23	871	15% FBS R1	Live	204	211	189	201	201.25	4025000	3000000	20125000	98.5312	0	2.74436	239.944
			Dead	3	3	4	2	3
			Red	0	0	0	0	0
2023-10-30	878	15% FBS R1	Live	121	131	112	109	118.25	2365000	3000000	11825000	95.9432	0	1.97766	241.922
			Dead	8	6	2	4	5
			Red	0	0	0	0	0
2023-11-06	885	15% FBS R1	Live	142	133	108	123	126.5	2530000	3000000	12650000	96.9349	0	2.0749	243.997
			Dead	6	4	4	2	4
			Red	0	0	0	0	0
2023-11-13	892	15% FBS R1	Live	198	153	163	168	170.5	3410000	3000000	17050000	97.0128	0	2.50528	246.502
			Dead	4	6	8	3	5.25
			Red	0	0	0	0	0
2023-11-20	899	15% FBS R1	Live	127	135	142	129	133.25	2665000	3000000	13325000	97.9779	0	2.14985	248.652
			Dead	4	2	2	3	2.75
			Red	0	0	0	0	0
2023-11-27	906	15% FBS R1	Live	89	891	102	97	294.75	5895000	3000000	29475000	98.5786	0	3.29454	251.946
			Dead	2	3	8	4	4.25
			Red	0	0	0	0	0
2023-12-05	914	15% FBS R1	Live	223	194	210	221	212	4240000	3000000	21200000	97.5834	0	2.81939	254.766
			Dead	3	5	8	5	5.25
			Red	0	0	0	0	0
2023-12-12	921	15% FBS R1	Live	206	197	187	202	198	3960000	3000000	19800000	93.1765	0	2.72089	257.486
			Dead	16	14	12	16	14.5
			Red	0	0	0	0	0
2023-12-19	928	15% FBS R1	Live	148	138	121	129	134	2680000	3000000	13400000	86.4516	0	2.15795	259.644
			Dead	25	12	30	17	21
			Red	0	0	0	0	0
2023-12-26	935	15% FBS R1	Live	153	119	125	135	133	2660000	3000000	13300000	75.6757	0	2.14714	261.792
			Dead	48	42	42	39	42.75
			Red	0	0	0	0	0
2024-01-02	942	15% FBS R1	Live	113	134	152	128	131.75	2635000	3000000	13175000	86.9637	0	2.13353	263.925
			Dead	21	22	15	21	19.75
			Red	0	0	0	0	0
2024-01-09	949	15% FBS R1	Live	194	153	180	176	175.75	3515000	3000000	17575000	92.6219	0	2.54901	266.474
			Dead	15	10	19	12	14
			Red	0	0	0	0	0
2024-01-16	956	15% FBS R1	Live	203	198	214	205	205	4100000	3000000	20500000	93.6073	0	2.77098	269.245
			Dead	12	15	15	14	14
			Red	0	0	0	0	0
2024-01-23	963	15% FBS R1	Live	224	196	217	210	211.75	4235000	3000000	21175000	92.4672	0	2.81769	272.063
			Dead	17	14	20	18	17.25
			Red	0	0	0	0	0
2024-01-30	970	15% FBS R1	Live	154	157	170	162	160.75	3215000	3000000	16075000	91.9886	0	2.42038	274.483
			Dead	10	15	14	17	14
			Red	0	0	0	0	0
2024-02-06	977	15% FBS R1	Live	187	210	216	205	204.5	4090000	3000000	20450000	93.379	0	2.76746	277.251
			Dead	14	17	12	15	14.5
			Red	0	0	0	0	0
2024-02-13	984	15% FBS R1	Live	214	189	209	221	208.25	4165000	3000000	20825000	93.9121	0	2.79366	280.044
			Dead	14	17	13	10	13.5
			Red	0	0	0	0	0
2024-02-20	991	15% FBS R1	Live	201	189	176	208	193.5	3870000	3000000	19350000	91.5976	0	2.68774	282.732
			Dead	12	20	26	13	17.75
			Red	0	0	0	0	0
2024-02-27	998	15% FBS R1	Live	253	312	288	294	286.75	5735000	3000000	28675000	70.2819	0	3.25487	285.987
			Dead	119	99	117	150	121.25
			Red	0	0	0	0	0
2024-03-05	1005	15% FBS R1	Live	165	156	159	161	160.25	3205000	3000000	16025000	89.2758	0	2.41589	288.403
			Dead	21	20	24	12	19.25
			Red	0	0	0	0	0
2024-03-12	1012	15% FBS R1	Live	154	171	189	150	166	3320000	3000000	16600000	89.3674	0	2.46672	290.869
			Dead	21	18	25	15	19.75
			Red	0	0	0	0	0
2024-03-19	1019	15% FBS R1	Live	182	179	187	172	180	3600000	3000000	18000000	93.1436	0	2.58346	293.453
			Dead	13	15	12	13	13.25
			Red	0	0	0	0	0
2024-03-26	1026	15% FBS R1	Live	221	220	198	210	212.25	4245000	3000000	21225000	91.2903	0	2.82109	296.274
			Dead	21	19	25	16	20.25
			Red	0	0	0	0	0
2024-04-02	1033	15% FBS R1	Live	237	222	230	219	227	4540000	3000000	22700000	91.9028	0	2.91796	299.192
			Dead	15	23	23	19	20
			Red	0	0	0	0	0
2024-04-09	1040	15% FBS R1	Live	230	224	241	238	233.25	4665000	3000000	23325000	91.8307	0	2.95713	302.149
			Dead	24	19	22	18	20.75
			Red	0	0	0	0	0
2024-04-16	1047	15% FBS R1	Live	214	220	203	212	212.25	4245000	3000000	21225000	92.1824	0	2.82109	304.97
			Dead	21	19	15	17	18
			Red	0	0	0	0	0
2024-04-23	1054	15% FBS R1	Live	124	146	134	144	137	2740000	3000000	13700000	92.1008	0	2.18987	307.16
			Dead	11	15	13	8	11.75
			Red	0	0	0	0	0
2024-04-30	1061	15% FBS R1	Live	185	187	192	183	186.75	3735000	3000000	18675000	91.769	0	2.63654	309.797
			Dead	16	17	14	20	16.75
			Red	0	0	0	0	0
2024-05-07	1068	15% FBS R1	Live	195	201	189	198	195.75	3915000	3000000	19575000	91.5789	0	2.70441	312.501
			Dead	17	18	21	16	18
			Red	0	0	0	0	0
2024-05-14	1075	15% FBS R1	Live	253	238	27	224	185.5	3710000	3000000	18550000	91.2669	0	2.62686	315.128
			Dead	24	26	2	19	17.75
			Red	0	0	0	0	0
2024-05-21	1082	15% FBS R1	Live	240	229	232	239	235	4700000	3000000	23500000	87.2795	0	2.9679	318.096
			Dead	36	34	29	38	34.25
			Red	0	0	0	0	0
2024-05-28	1089	15% FBS R1	Live	232	217	230	226	226.25	4525000	3000000	22625000	88.5519	0	2.91319	321.009
			Dead	32	26	31	28	29.25
			Red	0	0	0	0	0
2024-06-04	1096	15% FBS R1	Live	255	239	250	241	246.25	4925000	3000000	24625000	90.2015	0	3.03533	324.044
			Dead	17	27	32	31	26.75
			Red	0	0	0	0	0
2024-06-11	1103	15% FBS R1	Live	252	238	231	240	240.25	4805000	3000000	24025000	86.1111	0	2.99976	327.044
			Dead	38	35	42	40	38.75
			Red	0	0	0	0	0
2024-06-18	1110	15% FBS R1	Live	201	226	212	202	210.25	4205000	3000000	21025000	85.4675	0	2.80744	329.852
			Dead	35	33	38	37	35.75
			Red	0	0	0	0	0
2024-06-25	1117	15% FBS R1	Live	106	121	118	126	117.75	2355000	3000000	11775000	96.7146	0	1.97155	331.823
			Dead	4	4	3	5	4
			Red	0	0	0	0	0
2024-07-02	1124	15% FBS R1	Live	129	107	105	117	114.5	2290000	3000000	11450000	96.2185	0	1.93119	333.754
			Dead	4	5	5	4	4.5
			Red	0	0	0	0	0
2024-07-09	1131	15% FBS R1	Live	60	77	85	95	79.25	1585000	3000000	7925000	85.9079	0	1.40064	335.155
			Dead	14	15	6	17	13
			Red	0	0	0	0	0
2024-07-16	1138	15% FBS R1	Live	135	131	108	141	128.75	2575000	3000000	12875000	92.6259	0	2.10032	337.255
			Dead	9	9	10	13	10.25
			Red	0	0	0	0	0
2024-07-23	1145	15% FBS R1	Live	235	221	245	239	235	4700000	3000000	23500000	92.7022	0	2.9679	340.223
			Dead	21	19	16	18	18.5
			Red	0	0	0	0	0

## Sheet: Growth Summary
Table S4 – Growth and viability of L. variegatus embryonic cells - summary of growth in all media conditions
Day	3% FBS	5% FBS	10% FBS	15% FBS
0	0	0	0	0
3	2.28	2.46	2.6	2.42
7	3.33828	3.76181	4.07596	3.69228
10	3.49739	4.06419	4.12323	4.19449
14	3.54466	4.06419	4.37607	4.50658
21	3.92296	5.03326	5.0761	5.54161
28	4.35566	5.95238	6.11697	6.67845
35	5.1278	6.51277	6.7643	7.30258
42	5.1278	6.79554	6.7643	7.93448
49	5.26633	6.98657	6.86857	8.6271
56	5.26633	6.98657	7.09084	8.97739
63	5.53437	6.99884	7.74581	9.66256
70	5.53437	7.21581	8.35426	10.1983
77	6.10141	7.83213	8.676	10.8456
86	6.43273	8.13452	9.01684	13.6514
98	6.43273	8.34644	9.35768	14.1954
105	6.85875	8.68728	9.53815	14.7394
112	7.41097	9.53479	10.9836	15.9866
119	7.64349	9.53479	12.5434	16.8474
126	8.30607	10.3864	13.6245	17.7473
133	8.36493	11.0715	14.2564	18.2152
140	8.44668	11.5232	14.4992	18.8471
147	8.44668	11.5232	14.5695	19.0796
154	8.66668	12.364	14.9103	20.5727
161	8.66668	13.6511	15.7104	22.2423
169	9.06698	14.2437	17.2579	23.3121
175	9.06698	14.7628	18.3046	24.4379
182	9.53548	15.3713	19.0697	25.1005
189	10.0795	16.4063	19.8834	26.2428
196	10.281	17.3381	20.7376	27.6251
203	10.281	18.6103	22.2769	29.3466
210	10.6731	19.7635	23.3352	30.9702
216	11.8316	20.8102	23.3001	31.5224
223	12.9409	22.0825	24.9112	33.5743
230	14.5129	23.3696	24.9735	35.5851
236	16.1937	23.8287	26.2704	36.786
243	19.0484	24.6079	27.5526	38.5576
250	21.5302	25.3079	29.4775	40.5862
257	23.2073	26.101	30.9706	42.582
264	24.3925	28.1816	32.3013	44.5988
270	24.594	29.3668	33.0234	46.5299
277	24.8468	29.919	34.198	48.169
284	25.532	30.3338	37.2435	50.3824
291	26.0924	31.6307	40.592	52.7456
299	26.4614	33.8975	42.6839	55.9699
306	26.4614	35.7003	44.7007	57.7202
313	26.9372	37.0167	46.2686	59.2841
320	27.9001	37.8575	49.3543	61.8145
327	28.9756	38.1103	52.3465	63.8164
334	30.3716	39.0794	56.4871	66.8116
343	33.3472	42.3653	64.5321	69.1748
348	34.462	44.1716	67.4212	70.6765
355	36.9396	46.583	71.2327	72.7879
363	39.6085	46.6648	75.0276	75.2805
369	39.9206	46.9277	79.4513	76.4814
376	42.956	49.2166	87.122	78.0932
383	43.1885	50.6839	89.6071	79.025
390	44.7195	52.1338	92.1134	80.7501
398	48.2431	53.3911	97.1801	84.4033
404	49.4177	55.4019	102.254	86.429
411	52.5724	57.4653	106.479	88.0719
418	53.0998	59.8355	109.663	88.8156
425	54.3918	61.1946	111.996	89.741
432	57.7357	63.9603	114.089	92.0544
439	57.9055	65.6818	117.053	94.1519
445	58.6055	66.6009	120.271	94.9927
452	59.0559	67.5136	123.908	97.1399
460	59.3485	69.2168	128.835	99.4819
466	61.0554	70.3482	133.219	101.132
473	62.0059	72.3649	137.701	102.983
480	62.8733	73.797	142.625	104.401
487	63.3149	75.3363	147.29	106.69
494	63.9154	76.0729	151.931	107.267
501	65.1525	77.5315	156.319	109.17
508	67.5973	78.8186	161.425	111.439
515	68.8844	80.4304	166.644	113.027
522	69.3781	80.4304	171.841	114.591
529	69.4485	81.1451	176.166	115.917
536	70.6016	83.0982	180.293	117.936
543	72.4045	84.4242	185.248	120.873
550	74.5325	87.4784	190.242	123.475
557	76.29	89.4159	194.426	125.403
564	76.29	90.5472	197.614	127.425
572	77.3467	91.479	200.535	128.407
578	78.5266	93.2956	205.573	132.422
584	80.0985	94.0536	209.939	135.678
592	83.2356	95.2701	220.403	143.33
598	85.059	95.8707	225.673	145.653
606	86.0644	96.8087	230.235	148.761
612	86.2866	97.5949	234.53	150.742
619	86.9029	97.5949	238.172	152.471
626	87.0621	98.9477	241.975	155.206
633	87.0621	99.6624	243.798	156.957
640	88.8478	101.711	247.517	160.802
647	88.8478	103.187	250.19	162.903
654	88.8478	103.895	252.684	165.605
661	88.8866	104.624	255.307	167.798
668	89.0436	105.382	257.993	170.387
675	89.4403	106.295	260.382	172.783
682	89.4403	106.295	262.139	174.596
689	89.7365	106.295	264.44	176.699
696	89.7365	106.991	266.451	178.751
703	90.1481	108.128	268.695	180.611
710	91.6833	109.573	270.519	181.511
717	91.6833	110.015	273.049	183.476
724	91.6833	110.608	275.367	185.475
731	94.8514	111.994	277.211	186.757
738	96.1483	113.232	280.646	189.539
745	96.3498	113.856	282.826	191.993
752	96.4652	114.036	284.738	194.353
761	96.5583	114.036	286.682	196.837
766	97.1023	115.043	288.644	199.282
773	97.8954	117.089	292.144	203.176
780	99.367	117.557	294.376	206.447
787	99.367	118.059	296.873	209.196
794	100.256	118.953	299.286	211.935
801	101.498	119.046	300.568	214.535
808	101.498	120.081	302.737	217.211
815	102.101	121.561	305.34	220.45
823	103.841	122.354	308.324	223.927
829	103.841	122.354	309.859	226.904
836	103.841	122.858	311.852	229.932
843	104.345	122.858	312.658	232.052
850	104.345	123.283	313.194	234.038
857	106.278	124.565	315.58	235.291
864	107.078	125.272	316.556	237.2
871	108.69	126.816	318.277	239.944
878	110.183	128.334	320.193	241.922
885	111.47	129.309	322.098	243.997
892	112.972	130.853	323.499	246.502
899	114.43	132.217	324.657	248.652
906	116.181	133.675	325.832	251.946
914	118.112	135.724	328.594	254.766
921	119.915	137.296	330.575	257.486
928	121.221	138.636	332.664	259.644
935	121.965	138.909	334.83	261.792
942	123.903	139.86	336.507	263.925
949	126.142	141.301	337.6	266.474
956	128.147	143.381	340.159	269.245
963	130.036	144.941	341.312	272.063
970	131.961	145.886	342.896	274.483
977	133.939	147.54	345.059	277.251
984	135.879	149.799	347.813	280.044
991	137.974	151.737	349.811	282.732
998	139.133	154.721	352.302	285.987
1005	140.883	156.829	354.637	288.403
1012	142.693	158.193	357.106	290.869
1019	144.181	159.703	359.301	293.453
1026	146.09	161.675	361.961	296.274
1033	148.662	164.102	364.041	299.192
1040	150.908	166.136	366.166	302.149
1047	153.056	167.918	368.135	304.97
1054	154.367	170.374	370.63	307.16
1061	156.716	171.905	372.667	309.797
1068	158.663	173.907	375.601	312.501
1075	160.879	175.387	377.89	315.128
1082	162.414	177.353	380.424	318.096
1089	164.117	179.355	382.884	321.009
1096	166.297	181.619	385.865	324.044
1103	168.096	183.086	388.657	327.044
1110	169.368	184.545	391.02	329.852
1117	170.857	185.871	393.172	331.823
1124	172.657	187.118	395.495	333.754
1131	173.626	187.118	398.561	335.155
1138	174.595	188.331	400.231	337.255
1145	176.214	190.787	402.253	340.223

## Sheet: Viability Summary
Table S4 – Growth and viability of L. variegatus embryonic cells - summary of viability in all media conditions
Day	3% FBS	5% FBS	10% FBS	15% FBS
0	100	100	100	100
3	98.0469	99.6503	99.0506	98.9286
7	98.8142	99.6633	99.4048	99.6564
10	99.2593	98.0132	99.2	98.2659
14	96.875	97.3451	97.2789	100
21	73.5849	93.254	96.5347	95.3488
28	84.375	90.8	95.3668	96.3504
35	87.6068	91.7098	95.9184	96.3542
42	74.8428	83.908	87.7863	93.9394
49	87.3333	91.9463	96.2687	97
56	68.3824	85.4015	90.9091	93.865
63	56.2814	75.1592	95.9391	93.2367
70	68.75	80	93.8462	96.6667
77	74.0909	84.7926	98.0392	97.4093
86	72.5962	76.6839	96.2025	98.5915
98	59.6273	81.7647	91.5663	94.5946
105	55.8442	82.1622	88.8889	93.5829
112	67.6923	91.9149	98.1982	98.9583
119	52.809	83.6879	97.5207	100
126	67.8571	86.9388	97.6923	98.6784
133	64.7668	87.7273	98.4127	96.5116
140	65.1282	95.6522	97.931	98.9362
147	58.3333	86.9565	94.7368	97.2414
154	69.7368	95.1327	98.0645	98.8304
161	66.6667	94.822	96.7593	98.9637
169	74.1573	97.3118	98.3193	98.8235
175	68.7117	96.0894	98.8048	99.6198
182	84.6995	94.8187	98.5507	98.9583
189	90.6736	96.0938	97.6852	98.513
196	92.6174	97.0339	98.19	99.0506
203	92.3077	96.6667	98.5876	98.5075
210	91.9708	95.0178	98.0392	98.4043
216	93.7063	99.2	97.2112	100
223	93.1655	98.9761	99.7214	99.7996
230	98.892	98.9865	100	99.7938
236	98.4655	99.3976	99.6622	99.639
243	99.4279	98.0952	100	100
250	99.2604	100	100	99.7963
257	100	99.0476	99.4118	98.7629
264	90.3974	99.2188	99.67	97.006
270	96.5035	98.2014	99.4975	99.1342
277	97.2789	98.8764	98.9051	99.4681
284	98.4694	99.3789	98.4127	98.7589
291	99.4382	100	98.3923	98.5646
299	95.092	96.8174	96.7864	98.4224
306	95.6522	97.8972	98.1818	97.8208
313	100	99.0066	97.5342	99.7191
320	99.5745	98.6239	91.7266	99.1429
327	97.3077	92.8571	86.2816	98.364
334	98.75	99.5763	84.5464	98.2564
343	98.8494	99.154	94.8187	98.2512
348	99.6169	99.2908	95.4424	99.7067
355	99.5536	98.6111	97.2622	99.4253
363	99.0921	96.9466	94.8805	97.4063
369	100	97.9592	91.4894	98.5714
376	99.4949	98.9882	90.1869	98.9218
383	99.2958	95.1289	97.8182	98.2833
390	99.7126	98.7952	98.913	99.25
398	99.5677	99.308	94.6009	96.9231
404	90.9396	96.8	87.6623	94.7674
411	99.5349	98.4314	81.9508	98.4252
418	99.4253	99.2013	87.2255	99.505
425	99.661	99.6764	100	94.6058
432	99.3485	97.9616	97.619	99.3344
439	100	100	98.1675	100
445	99.4898	99.5614	98.0263	100
452	99.3939	97.8355	97.2358	99.8124
460	97.351	98.7374	95.0649	99.8361
466	97.5124	97.4074	94.5386	99.4723
473	98.3051	97.7867	92.7461	98.6333
480	98.6486	98.7805	92.1717	99.6894
487	99.3902	96.6759	89.9705	99.6604
494	97.3262	100	91.7431	98.895
501	96.2585	98.2143	93.2407	98.8987
508	99.6951	98.9865	90.7895	99.4845
515	97.6667	97.0899	89.0656	99.7238
522	99.4118	98.2906	85.9649	99.162
529	96.9231	97.0443	88.2784	99.3399
536	98.1618	97.2803	91.3043	99.1853
543	98.8208	99.6689	96.3824	100
550	99.2439	97.8431	98.5209	99.0489
557	99.5098	99.1379	94.6912	99.3478
564	100	98.8722	90.8714	97.6
572	95.6522	95.0207	94.0568	94.4223
578	98.5507	98.6014	93.7129	95.858
584	96.748	96.6667	91.1765	92.8803
592	95.9165	97.8947	93	96.375
598	97.032	96.8085	89.4027	88.774
606	97.9675	97.0464	86.5854	91.1972
612	100	98.1043	93.6508	94.0476
619	97.8723	100	93.0233	95.4436
626	97.8102	97.3545	97.1056	98.1595
633	95.6897	96.0976	98.6079	97.8208
640	98.9664	99.5992	99.8737	99.8844
647	96.7213	97.9472	98.2051	97.3535
654	99.0991	93.7799	97.974	97.995
661	93.3884	94.7619	95.8549	96.6549
668	94.0299	97.1292	96.8672	97.4394
675	100	94.5607	96.3247	96.1948
682	98.2759	99.1071	97.8313	97.6852
689	100	100	96.5742	96.8105
696	95.8333	99.2958	95.6522	96.325
703	97.4522	99.2481	95.7912	96.4602
710	95.8678	94.2363	95.7207	96.5517
717	98.8889	99.3902	94.2935	91.068
724	100	97.8378	94.3307	92.3077
731	98.2143	97.8193	96.8539	97.01
738	98.9933	97.2509	93.6599	92.3937
745	98.5714	98.4043	79.0698	92.4157
752	99.2366	97.8417	95.7627	93.3434
761	98.4615	98	98.2979	95.1841
766	97.7654	98.5	95.9016	94.7826
773	97.6526	98.6083	96.3173	95.6103
780	90.7357	95.9538	92.7632	90.3427
787	97.9381	100	89.4459	89.3805
794	97.2376	96.9565	88.1543	83.0228
801	97.5945	99.2248	86.3905	88.9976
808	96.3415	96.0938	86.8167	86.6817
815	92.3077	95.7143	87.7404	90.5751
823	95.0237	95.4128	90.4762	89.6783
829	96.3855	94.2308	91.0995	93.1102
836	96.1039	95.8621	94.0945	95.5166
843	93.75	90.7563	95.0226	94.0541
850	98.0583	96.6667	91.0995	95.5823
857	96.7419	96.6887	96.7643	96.9492
864	97.2093	97.0297	95.935	95.5508
871	98.1283	98.5915	97.2973	98.5312
878	98.2558	97.1751	97.0021	95.9432
885	98.9865	96.7213	96.3597	96.9349
892	97.9827	97.493	97.2393	97.0128
899	98.2143	97.1698	98.1685	97.9779
906	98.2968	97.6331	96.7857	98.5786
914	98.2833	97.8346	96.9084	97.5834
921	96.1009	97.2752	91.1538	93.1765
928	97.0588	98.0645	91.25	86.4516
935	98.0488	96.6667	88.5057	75.6757
942	97.4576	97.8903	94.8148	86.9637
949	95.9391	93.4097	97.3384	92.6219
956	96.9819	96.3947	92.549	93.6073
963	96.3203	96.4578	95.6989	92.4672
970	96	96.6527	94.9868	91.9886
977	95.9432	96.9231	91.3413	93.379
984	96.4435	96.9646	96.0854	93.9121
991	96.9754	97.2516	96.9697	91.5976
998	97.1014	93.192	88.0272	70.2819
1005	96.6507	96.1039	93.5185	89.2758
1012	95.6818	97.4763	92.3611	89.3674
1019	95.1977	97.7143	94.8276	93.1436
1026	97.8308	97.5155	94.7566	91.2903
1033	97.541	97.1429	96.2121	91.9028
1040	97.9381	98.2036	93.2384	91.8307
1047	97.6147	98.0998	90.2111	92.1824
1054	96.7532	97.4852	94.4212	92.1008
1061	94.4444	96.9274	95.7282	91.769
1068	97.065	97.1717	93.3876	91.5789
1075	97.3822	97.3837	91.5757	91.2669
1082	97.479	96.701	89.3453	87.2795
1089	96.0688	96.5863	87.3184	88.5519
1096	93.9551	94.281	84.1171	90.2015
1103	94.1441	94.3182	74.2857	86.1111
1110	94.1558	96.7742	89.3064	85.4675
1117	96.8391	96.1661	96.3899	96.7146
1124	98.1221	97.2696	97.4068	96.2185
1131	98.3264	96	93.4076	85.9079
1138	95.1417	98.8166	95.7393	92.6259
1145	94.8586	97.6296	95.3125	92.7022

## Sheet: Red Cells Summary
Table S4 – Growth and viability of L. variegatus embryonic cells - percent of red cells in all media conditions
Day	3% FBS	5% FBS	10% FBS	15% FBS
3	0	0.701754	0.319489	0
7	0.4	0.337838	0.299401	0
10	0	0.675676	0	0
14	0	0	0.699301	0
21	0	0	0	0
28	0	1.32159	4.45344	1.51515
35	1.46341	3.9548	4.25532	3.24324
42	1.68067	1.36986	0.869565	3.76344
49	1.52672	2.91971	8.52713	6.18557
56	4.30108	8.54701	2.14286	5.88235
63	8.03571	11.0169	13.7566	10.3627
70	4.54545	19.8529	21.8579	14.3678
77	11.6564	7.06522	22	18.617
86	1.98675	5.40541	13.8158	2.61905
98	21.875	19.4245	10.5263	9.71429
105	13.1783	16.4474	13.2353	1.14286
112	11.3636	17.5926	8.56269	3.50877
119	9.92908	13.5593	1.69492	1.83486
126	17.8947	14.554	3.14961	0
133	14.4	18.1347	1.07527	0.60241
140	22.8346	17.4242	0.704225	0.537634
147	18.6813	12.5	1.5873	0.70922
154	13.2075	8.37209	2.63158	1.18343
161	27	6.14334	1.43541	1.57068
169	20.4545	7.73481	0	0.793651
175	19.6429	5.81395	0.403226	0
182	21.2903	8.19672	0	1.05263
189	17.7143	3.25203	1.4218	1.13208
196	14.4928	2.18341	1.38249	0.958466
203	6.25	0.689655	0	0.505051
210	11.9048	2.99625	0	0.27027
216	5.59701	3.62903	2.04918	2.27273
223	1.5444	2.06897	1.95531	1.00402
230	0.840336	0.682594	2.61097	0.826446
236	2.07792	3.0303	1.69492	2.17391
243	1.03567	3.39806	6.16438	1.46341
250	2.68256	2.05128	1.97368	2.2449
257	8.59375	2.40385	3.25444	2.71399
264	1.8315	0.393701	0.662252	0.411523
270	2.17391	0	0.505051	0.655022
277	2.0979	0	0	0.534759
284	1.03627	0	0	0
291	0.564972	0	0	0
299	0.645161	0	0	0.178094
306	0	0.71599	0.205761	0.49505
313	0.653595	0	0.280899	0.84507
320	0	0	0	0.288184
327	0	0.699301	0.41841	0.2079
334	0	0.425532	0	0
343	0	0	0.728597	0
348	0	0.47619	0	0
355	0.149477	0.156495	0.148148	0.192678
363	0	0	0	0
369	0.671141	0	0	1.44928
376	0	0	0.129534	0.27248
383	0	0	0	0.436681
390	0	0	0	0
398	0	0	0	0.132275
404	0	0	0	0.204499
411	0.0934579	0	0	0
418	0	0	0	0.995025
425	0.340136	0	0	0
432	0	0	0	0
439	0	0	0	0
445	0.512821	0	0	0
452	0	0	0	0
460	0	0	0	0.164204
466	0	0	0	0
473	0	0	0.0931099	0
480	0	0	0	0
487	0	0	0	0
494	0	0	0	0
501	0	0.30303	0	0
508	0	0	0	0
515	0	0	0	0
522	0	0	0	0
529	0	0	0	0
536	0	0	0	0
543	0	0	0	0
550	0.190476	0	0	0
557	0	0	0	0
564	0	0	0	0
572	0	0	0	0
578	0	0.236407	0	0
584	0	0	0	0
592	0	0	0	0
598	0.235294	0	0	0
606	0	0	0	0
612	0	0	0	0
619	0	0	0	0
626	0	0	0	0
633	0	0	0	0
640	0	0	0	0
647	0	0	0	0
654	0	0	0	0
661	0	0	0	0
668	0	0	0	0
675	0	0	0	0
682	0	0	0	0
689	0	0	0	0
696	0	0	0	0
703	0	0	0	0
710	0	0	0	0
717	0	0	0	0
724	0	0	0	0
731	0	0	0	0
738	0	0	0	0
745	0	0	0	0
752	0	0	0	0
761	0	0	0	0
766	0	0	0	0
773	0	0	0	0
780	0	0	0	0
787	0	0	0	0
794	0	0	0	0
801	0	0	0	0
808	0	0	0	0
815	0	0	0	0
823	0	0	0	0
829	0	0	0	0
836	0	0	0	0
843	0	0	0	0
850	0	0	0	0
857	0	0	0	0
864	0	0	0	0
871	0	0	0	0
878	0	0	0	0
885	0	0	0	0
892	0	0	0	0
899	0	0	0	0
906	0	0	0	0
914	0	0	0.122699	0
921	0	0	0	0
928	0	0	0	0
935	0	0	0	0
942	0	0	0	0
949	0	0	0	0
956	0	0	0	0
963	0	0	0	0
970	0	0	0	0
977	0	0	0	0
984	0	0	0	0
991	0	0	0	0
