# Supplementary material for: Genetically tractable embryonic cell lines from sea urchins
Source: Research Square preprint supplement (doi:10.21203/rs.3.rs-5665288/v1), 2025-01-15
Supplement: Supplementary file 4 [file 71ffcb6f2ac5c16af7ea0a3b.xlsx]

## Sheet: Lv cells first mating pair 18S
Table S3. Genetic validation of L. variegatus embryo cell cultures from the first mating pair with 18S targeted amplicon sequencing
Sample ID	Days in Culture	Number of merged paired-end reads	Number of merged reads that form the predominant read	Percent of reads that form the predominant read	Top blast hit from merged_uniq0.9.fasta file	Query Cover	E-value	Percent Identity	Sequence Output
Lv UM 3% FBS	3		1887		PREDICTED: Lytechinus variegatus small subunit ribosomal RNA (LOC121405624), rRNA	1	0	1	GCTTGTCTCAAAGATTAAGCCATGCATGTCTTCGTGCAAGCTCCTCGAGCGAAACTGCGGATGGCTCATTAAATCAGTTATGGTTCATTGGATCGAGTCCCCCGGACATGGATAACTGTGGTAATTCTAGAGCTAATACATGCGTCCAAGCGCCGACTCTCCAGAAGGCGTGCTTTTATTAGGAAAAAGACCAGCCCGGCTCCGGCCGGTACCACTGGTGAACTCTGGATAACACAGCCGATCGCACGGCCCTCGCGCCGGCGACGGATCCTTCGAATGTCTGCCCTATCAACTTTCGATGGTACGTTATGCGCCTACCATGGTCGTCACGGGTAACGGAGAATCAGGGTTCGATTCCGGAGAGGGAGCCTGAGAAACGGCTACCACATCCAAGGAAGG…
Lv UM 3% FBS	82		3075		PREDICTED: Lytechinus variegatus small subunit ribosomal RNA (LOC121405624), rRNA	1	0	1	GCTTGTCTCAAAGATTAAGCCATGCATGTCTTCGTGCAAGCTCCTCGAGCGAAACTGCGGATGGCTCATTAAATCAGTTATGGTTCATTGGATCGAGTCCCCCGGACATGGATAACTGTGGTAATTCTAGAGCTAATACATGCGTCCAAGCGCCGACTCTCCAGAAGGCGTGCTTTTATTAGGAAAAAGACCAGCCCGGCTCCGGCCGGTACCACTGGTGAACTCTGGATAACACAGCCGATCGCACGGCCCTCGCGCCGGCGACGGATCCTTCGAATGTCTGCCCTATCAACTTTCGATGGTACGTTATGCGCCTACCATGGTCGTCACGGGTAACGGAGAATCAGGGTTCGATTCCGGAGAGGGAGCCTGAGAAACGGCTACCACATCCAAGGAAGG…
Lv UM 3% FBS	110		2706		PREDICTED: Lytechinus variegatus small subunit ribosomal RNA (LOC121405624), rRNA	1	0	1	GCTTGTCTCAAAGATTAAGCCATGCATGTCTTCGTGCAAGCTCCTCGAGCGAAACTGCGGATGGCTCATTAAATCAGTTATGGTTCATTGGATCGAGTCCCCCGGACATGGATAACTGTGGTAATTCTAGAGCTAATACATGCGTCCAAGCGCCGACTCTCCAGAAGGCGTGCTTTTATTAGGAAAAAGACCAGCCCGGCTCCGGCCGGTACCACTGGTGAACTCTGGATAACACAGCCGATCGCACGGCCCTCGCGCCGGCGACGGATCCTTCGAATGTCTGCCCTATCAACTTTCGATGGTACGTTATGCGCCTACCATGGTCGTCACGGGTAACGGAGAATCAGGGTTCGATTCCGGAGAGGGAGCCTGAGAAACGGCTACCACATCCAAGGAAGG…
Lv EB UM 3-5% FBS	173	1946	1933	0.99332	PREDICTED: Lytechinus variegatus small subunit ribosomal RNA (LOC121405624), rRNA	1	0	0.9974	AAAGATTAAGCCATGCATGTCTTCGTGCAAGCTCCTCGAGCGAAACTGCGGATGGCTCATTAAATCAGTTATGGTTCATTGGATCGAGTCCCCCGGACATGGATAACTGTGGTAATTCTAGAGCTAATACATGCGTCCAAGCGCCGACTCTCCAGAAGGCGTGCTTTTATTAGGAAAAAGACCAGCCCGGCTCCGGCCGGTACCACTGGTGAACTCTGGATAACACAGCCGATCGCACGGCCCTCGCGCCGGCGACGGATCCTTCGAATGTCTGCCCTATCAACTTTCGATGGTACGTGATGCGCCTACCATGGTCGTCACGGGTAACGGAGAATCAGGGTTCGATTCCGGAGAGGGAGCCTGAGAAACGGCTACCACATCCAAG
Lv UM 3% FBS	229	1998	1982	0.991992	PREDICTED: Lytechinus variegatus small subunit ribosomal RNA (LOC121405624), rRNA	1	0	0.9897	AAAGATTAAGCCATGCATGTCTTCGTGCAAGCTCCTCGAGCGAAACTGCGGATGGCTCATTAAATCAGTTATGGTTCATTGGATCGAGTCCCCCGGACATGGATAACTGTGGTAATTCTAGAGCTAATACATGCGTCCAAGCGCCGACTCTCCAGAAGGCGTGCTTTTATTAGGAAAAAGACTAGCCCGGCTCCGGCCGGCACCACTGGTGAACTCTGGATAACGCAGCCGATCGCACGGCCCTCGCGCCGGCGACGGATCCTTCGAATGTCTGCCCTATCAACTTTCGATGGTACGTTATGCGCCTACCATGGTCGTCACGGGTATCGGAGAATCAGGGTTCGATTCCGGAGAGGGAGCCTGAGAAACGGCTACCACATCCAAGGAAG
Lv UM 3% FBS	369	3824	3820	0.998954	PREDICTED: Lytechinus variegatus small subunit ribosomal RNA (LOC121405624), rRNA	1	0	0.9947	TAAGCCATGCATGTCTTCGTGCAAGCTCCTCGAGCGAAACTGCGGATGGCTCATTAAATCAGTTATGGTTCATTGGATCGAGTCCCCCGGACATGGATAACTGTGGTAATTCTAGAGCTAATACATGTGTCCAAGCGCCGACTCTCCAGAAGGCGTGCTTTTATTAGGAAAAAGACCAGCCCGGCTCCGGCCGGTACCACTGGTGAACTCTGGATAACACAGCCGATCGCACGGCCCTCGCGCCGGCGACGGATCCTTCGAATGTCTGCCCTATCAACTTTCGATGGTACGTTATGCGCCTACCATGGTCGTCACGGGTAACGGAGAATCAGGGTTCGATTCCGGAGAGGGAGCCTGAGAAACGGCTACCACACCA
Lv EB UM 3-5% FBS	369	3520	3488	0.990909	PREDICTED: Lytechinus variegatus small subunit ribosomal RNA (LOC121405624), rRNA	1	0	0.9973	TAAGCCATGCATGTCTTCGTGCAAGCTCCTCGAGCGAAACTGCGGATGGCTCATTAAATCAGTTATGGTTCATTGGATCGAATCCCCCGGACATGGATAACTGTGGTAATTCTAGAGCTAATACATGCGTCCAAGCGCCGACTCTCCAGAAGGCGTGCTTTTATTAGGAAAAAGACCAGCCCGGCTCCGGCCGGTACCACTGGTGAACTCTGGATAACACAGCCGATCGCACGGCCCTCGCGCCGGCGACGGATCCTTCGAATGTCTGCCCTATCAACTTTCGATGGTACGTTATGCGCCTACCATGGTCGTCACGGGTAACGGAGAATCAGGGTTCGATTCCGGAGAGGGAGCCTGAGAAACGGCTACCACATCCA
Lv UM 3-5% FBS	369	3330	3325	0.998498	PREDICTED: Lytechinus variegatus small subunit ribosomal RNA (LOC121405624), rRNA	1	0	0.9973	TAAGCCATGCATGTCTTCGTGCAAGCTCCTCGAGCGAAACTGCGGATGGCTCATTAAATCAGTTATGGTTCATTGAATCGAGTCCCCCGGACATGGATAACTGTGGTAATTCTAGAGCTAATACATGCGTCCAAGCGCCGACTCTCCAGAAGGCGTGCTTTTATTAGGAAAAAGACCAGCCCGGCTCCGGCCGGTACCACTGGTGAACTCTGGATAACACAGCCGATCGCACGGCCCTCGCGCCGGCGACGGATCCTTCGAATGTCTGCCCTATCAACTTTCGATGGTACGTTATGCGCCTACCATGGTCGTCACGGGTAACGGAGAATCAGGGTTCGATTCCGGAGAGGGAGCCTGAGAAACGGCTACCACATCCA
Lv UM 10% FBS	369	821	783	0.953715	PREDICTED: Lytechinus variegatus small subunit ribosomal RNA (LOC121405624), rRNA	1	0	0.992	TAAGCCATGCATGTCTTCGTGCAAGCTCCTCGAGCGAAACTGCAGATGGCTCATTAAATCAGTTATGGTTCATTGGATCGAGTCCCCCGGGCATGGATAACTGTGGTAATTCTAGAGCTAATACATGCGTCCAAGCGCCGACTCTCCAGAAGGCGTGCTTTTATTGGGAAAAAGACCAGCCCGGCTCCGGCCGGTACCACTGGTGAACTCTGGATAACACAGCCGATCGCACGGCCCTCGCGCCGGCGACGGATCCTTCGAATGTCTGCCCTATCAACTTTCGATGGTACGTTATGCGCCTACCATGGTCGTCACGGGTAACGGAGAATCAGGGTTCGATTCCGGAGAGGGAGCCTGAGAAACGGCTACCACATCCA
Lv UM 15% FBS	369	1744	1738	0.99656	PREDICTED: Lytechinus variegatus small subunit ribosomal RNA (LOC121405624), rRNA	1	0	0.992	TAAGCCATGCATGTCTTCGTGCAAGCTCCTCGAGCGAAACTGCGGATGGCTCATTAAATCAGTTATGGTTCATTGGATCGAGTCCCCCGGACATGGATAACTGTGGTAATTCTAGAGCTAATACATGCGTCCAAGCGCCGACTCTCCAGAAGGCGTGCTTTTATTAGGAAAGAGACCAGCCCGGCTCCGGCCGGTACCACTGGTGAACTCTGGATAACACAGCCGATCGCACGGCCCTCGCGCCGGCGACGGATCCTTCGAATGTCTGCCCTATCAACTTTCGATGGTACGTTATGCGCCTACCATGGTCGTCACGGGTAACGGAGAATCAGGGTTCGATTCCGGAGAGGGAGCCTGAGAAACGGCTACCACATCCA

## Sheet: Lv cells second mating pair 18S
Table S3. Genetic validation of L. variegatus embryo cell cultures from the second mating pair with 18S targeted amplicon sequencing
Sample ID	Days in Culture	Number of merged paired-end reads	Number of merged reads that form the predominant read	Percent of reads that form the predominant read	Top blast hit from merged_uniq0.9.fasta file	Query Cover	E-value	Percent Identity	Sequence Output
Lv UM 3% FBS	22	1725	1716	0.994783	PREDICTED: Lytechinus variegatus small subunit ribosomal RNA (LOC121405624), rRNA	1	0	0.9974	AAAGATTAAGCCATGCATGTCTTCGTGCAAGCTCCTCGAGCGAAACTGCGGACGGCTCATTAAATCAGTTATGGTTCATTGGATCGAGTCCCCCGGACATGGATAACTGTGGTAATTCTAGAGCTAATACATGCGTCCAAGCGCCGACTCTCCAGAAGGCGTGCTTTTATTAGGAAAAAGACCAGCCCGGCTCCGGCCGGTACCACTGGTGAACTCTGGATAACACAGCCGATCGCACGGCCCTCGCGCCGGCGACGGATCCTTCGAATGTCTGCCCTATCAACTTTCGATGGTACGTTATGCGCCTACCATGGTCGTCACGGGTAACGGAGAATCAGGGTTCGATTCCGGAGAGGGAGCCTGAGAAACGGCTACCACATCCAAGGAAG
Lv UM 5% FBS	22	1744	1734	0.994266	PREDICTED: Lytechinus variegatus small subunit ribosomal RNA (LOC121405624), rRNA	1	0	0.9949	AAAGATTAAGCCATGCATGTCTTCGTGCAAGCTCCTCGAGCGAAACTGCGGATGGCTCATTAAATCAGTTATGGTTCATTGGATCGAGTCCCCCGGACATGGATAACTGTGGTAATTCTAGAGCTAATACATGCGTCCAAGCGCCGACTCTCCAGGAGGCGTGCTTTTATTAGGAAAAAGACCAGCCCGGCTCCGGCCGGTACCACTGGTGAACTCTGGATAACACAGCCGATCGCACGGCCCTCGCGCCGGCGACGGATCCTTCGAATGTCTGCCCTATCAACTTTCGATGGTACGTTATGCGCCTACCATGGTCGTCACGGGTAACGGAGAATCAGGGTTCGACTCCGGAGAGGGAGCCTGAGAAACGGCTACCACATCCAAGGAAG
Lv UM 10% FBS	22	1620	1613	0.995679	PREDICTED: Lytechinus variegatus small subunit ribosomal RNA (LOC121405624), rRNA	1	0	0.9949	AAAGATTAAGCCATGCATGTCTTCGTGCAAGCTCCTCGAGCGAAACTGCGGATGGCTCATTAAATCAGTTATGGTTCATTGGATCGAGTCCCCCGGACATGGATAACTGTGGTAATTCTAGAGCTAATACATGCGTCCAAGCGCCGACTCTCCAGAAGGCGTGCTTTTATTAGGAAAAAGACCAGCCCGGCTCCGGCCGGTACCACTGGTGAACTCTGGATACACAGCCGATCGCACGGCCCTCGCGCCGGCGACGGATCCTTCGAATGTCTGCCCTATCAACTTTCGATGGTACGTTATGCGCCTACCATGGTCGTCACGGGTAGCGGAGAATCAGGGTTCGATTCCGGAGAGGGAGCCTGAGAAACGGCTACCACATCCAAGGAAG
Lv UM 15% FBS	22	1769	1764	0.997174	PREDICTED: Lytechinus variegatus small subunit ribosomal RNA (LOC121405624), rRNA	1	0	0.9923	AAAGATTAAGCCATGCATGTCTTCGTGCAAGCTCCTCGAGCGAAACTACGGATGGCTCATTAAATCAGTTATGGTTTATTGGATCGAGTCCCCCGGACATGGATAACTGTGGTAATTCTAGAGCTAATACATGCGTCCAAGCGCCGACTCTCCAGAAGGCGTGCTTTTATTAGGAAAAAGACCAGCCCGGCTCCGGCCGGTACCACTGGTGAACTCTGGATAACACAGCCGATCGCACGGACCTCGCGCCGGCGACGGATCCTTCGAATGTCTGCCCTATCAACTTTCGATGGTACGTTATGCGCCTACCATGGTCGTCACGGGTAACGGAGAATCAGGGTTCGATTCCGGAGAGGGAGCCTGAGAAACGGCTACCACATCCAAGGAAG
Lv UM 3% FBS	112	2017	2007	0.995042	PREDICTED: Lytechinus variegatus small subunit ribosomal RNA (LOC121405624), rRNA	1	0	0.9949	AAAGATTAAGCCATGCATGTCTTCGTGCAAGCTCCTCGAGCGAAACTGCGGATGGCTCATTAAATCAGTTATGGTTCATTGGATCGAGTCCCCCGGACATGGATAACTGTGGTAATTCTAGAGCTAATACATGCGTCCAAGCGCCGACTCTCCAGAAGGCGTGCTTTTATTAGGAAAAAGACCAGCCCGGCTCCGGCCGGTACCACTAGTGAACTCTGGATAACACAGCCGATCGCACGGCCCTCGCGCCGGCGACGGAACCTTCGAATGTCTGCCCTATCAACTTTCGATGGTACGTTATGCGCCTACCATGGTCGTCACGGGTAACGGAGAATCAGGGTTCGATTCCGGAGAGGGAGCCTGAGAAACGGCTACCACATCCAAGGAAG
Lv UM 5% FBS	112	1810	1805	0.997238	PREDICTED: Lytechinus variegatus small subunit ribosomal RNA (LOC121405624), rRNA	1	0	0.9974	AAAGATTAAGCCATGCATGTCTTCGTGCAAGCTCCTCGAGCGAAACTGCGGACGGCTCATTAAATCAGTTATGGTTCATTGGATCGAGTCCCCCGGACATGGATAACTGTGGTAATTCTAGAGCTAATACATGCGTCCAAGCGCCGACTCTCCAGAAGGCGTGCTTTTATTAGGAAAAAGACCAGCCCGGCTCCGGCCGGTACCACTGGTGAACTCTGGATAACACAGCCGATCGCACGGCCCTCGCGCCGGCGACGGATCCTTCGAATGTCTGCCCTATCAACTTTCGATGGTACGTTATGCGCCTACCATGGTCGTCACGGGTAACGGAGAATCAGGGTTCGATTCCGGAGAGGGAGCCTGAGAAACGGCTACCACATCCAAGGAAG
Lv UM 10% FBS	112	1485	1479	0.99596	PREDICTED: Lytechinus variegatus small subunit ribosomal RNA (LOC121405624), rRNA	1	0	0.9949	AAAGATTAAGCCATGCATGTCTTCGTGCAAGCTCCTCGAGCGAAACTGCGGATGGCTCATTAAATCAGTTATGGTTCATTGGATCGAGTCCCCCGGACATGGATAACTGTGGTAATTCTAGAGCTAATACATGCGTCCAAGCGCCGACTCTCCAGAAGGCGTGCTTTGATTAGGAAAAAGACCAGCCCGGCTCCGGCCGGTACCACTGGTGAACTCTGGATAACACAGCCGATCGCACGGCCCTCGCGCCGGCGACGGATCCTTCGAATGTCTGCCCTATCAACTTTCGATGGTACGTTATGCGCCTACCATGGTCGTCACGGGTAACGGAGAATCAGGGTTCGATTCCGGAGAGGGAGCCTAAGAAACGGCTACCACATCCAAGGAAG
Lv UM 15% FBS	112	758	754	0.994723	PREDICTED: Lytechinus variegatus small subunit ribosomal RNA (LOC121405624), rRNA	1	0	0.9949	AAAGATTAAGCCATGCATGTCTTCGTGCAAGCTCCTCGAGCGAAACTGCGGATGGCTCATTAAATCAGTTATGGTTCATTGGATCGAGTCCCCCGGACATGGATAACTGTGGTAATTCTAGAGCTAATACATGCGTCCAAGCGCCGACTCTCCGGAAGGCGTGCTTTTATTAGGAAAAAGACCAGCCCGGCTCCGGCCGGTACCACTGGTGAACTCTGGATAACACAGCCGATCGCACGGCCCTCGCGCCGGCGACGGATCCTTCGAATGTCTGCCCTATCAACTTTCGATGGTACGTTATGCGCCTACCATGGTCGTCACGGGTAACGGAGAATCAGGGTTCGATTCCGGAGAGGGAGTCTGAGAAACGGCTACCACATCCAAGGAAG
Lv UM 3% FBS	334	2174	2165	0.99586	PREDICTED: Lytechinus variegatus small subunit ribosomal RNA (LOC121405624), rRNA	1	0	0.9947	TAAGCCATGCATGTCTTCGTGCAAGCTCCTCGAGCGAAACTGCGGAGGGCTCATTAAATCAGTTACGGTTCATTGGATCGAGTCCCCCGGACATGGATAACTGTGGTAATTCTAGAGCTAATACATGCGTCCAAGCGCCGACTCTCCAGAAGGCGTGCTTTTATTAGGAAAAAGACCAGCCCGGCTCCGGCCGGTACCACTGGTGAACTCTGGATAACACAGCCGATCGCACGGCCCTCGCGCCGGCGACGGATCCTTCGAATGTCTGCCCTATCAACTTTCGATGGTACGTTATGCGCCTACCATGGTCGTCACGGGTAACGGAGAATCAGGGTTCGATTCCGGAGAGGGAGCCTGAGAAACGGCTACCACATCCA
Lv UM 5% FBS	334	2897	2880	0.994132	PREDICTED: Lytechinus variegatus small subunit ribosomal RNA (LOC121405624), rRNA	1	0	0.9947	TAAGCCATGCATGTCTTCGTGCAAGCTCCTCGAGCGAAACTGCGGATGGCTCATTAAATCAGTTATGGTTCATTGGATCGAGTCCCCCGGACATGGATAACTGTGGTAATTCTAGAGCTAATACATGCGTCCAAGCGCCGACTCTCCAGAAGGCGTGCTTTTATTAGGAAAAAGACCAGCCCGGCTCCGGCCGGTACCACTGGTGAACCCTGGATAACATAGCCGATCGCACGGCCCTCGCGCCGGCGACGGATCCTTCGAATGTCTGCCCTATCAACTTTCGATGGTACGTTATGCGCCTACCATGGTCGTCACGGGTAACGGAGAATCAGGGTTCGATTCCGGAGAGGGAGCCTGAGAAACGGCTACCACATCCA
Lv UM 10% FBS	334	2122	2113	0.995759	PREDICTED: Lytechinus variegatus small subunit ribosomal RNA (LOC121405624), rRNA	1	0	0.9973	AAGCCATGCATGTCTTCGTGCAAGCTCCTCGAGCGAAACTGCGGATGGCTCATTAAATCAGTTATGGTTCATTGGATCGAGTCCCCCGGACATGGATAACTGTGGTAATTCTAGAGCTAATGCATGCGTCCAAGCGCCGACTCTCCAGAAGGCGTGCTTTTATTAGGAAAAAGACCAGCCCGGCTCCGGCCGGTACCACTGGTGAACTCTGGATAACACAGCCGATCGCACGGCCCTCGCGCCGGCGACGGATCCTTCGAATGTCTGCCCTATCAACTTTCGATGGTACGTTATGCGCCTACCATGGTCGTCACGGGTAACGGAGAATCAGGGTTCGATTCCGGAGAGGGAGCCTGAGAAACGGCTACCACATCCA
Lv UM 15% FBS	334	4148	4140	0.998071	PREDICTED: Lytechinus variegatus small subunit ribosomal RNA (LOC121405624), rRNA	1	0	0.9973	TAAGCCGTGCATGTCTTCGTGCAAGCTCCTCGAGCGAAACTGCGGATGGCTCATTAAATCAGTTATGGTTCATTGGATCGAGTCCCCCGGACATGGATAACTGTGGTAATTCTAGAGCTAATACATGCGTCCAAGCGCCGACTCTCCAGAAGGCGTGCTTTTATTAGGAAAAAGACCAGCCCGGCTCCGGCCGGTACCACTGGTGAACTCTGGATAACACAGCCGATCGCACGGCCCTCGCGCCGGCGACGGATCCTTCGAATGTCTGCCCTATCAACTTTCGATGGTACGTTATGCGCCTACCATGGTCGTCACGGGTAACGGAGAATCAGGGTTCGATTCCGGAGAGGGAGCCTGAGAAACGGCTACCACATCCA
Lv UM 3% FBS	487	1106	1095	0.990054	PREDICTED: Lytechinus variegatus small subunit ribosomal RNA (LOC121405624), rRNA	1	0	0.9975	TCTCAAAGATTAAGCCATGCATGTCTTCGTGCAAGCTCCTCGAGCGAAACTGCGGATGGCTCATTAAATCAGTTATGGTTCATTGGATCGAGTCCCCCGGACACGGATAACTGTGGTAATTCTAGAGCTAATACATGCGTCCAAGCGCCGACTCTCCAGAAGGCGTGCTTTTATTAGGAAAAAGACCAGCCCGGCTCCGGCCGGTACCACTGGTGAACTCTGGATAACACAGCCGATCGCACGGCCCTCGCGCCGGCGACGGATCCTTCGAATGTCTGCCCTATCAACTTTCGATGGTACGTTATGCGCCTACCATGGTCGTCACGGGTAACGGAGAATCAGGGTTCGATTCCGGAGAGGGAGCCTGAGAAACGGCTACCACATCCAAGGAAGGCAG
Lv UM 5% FBS	487	1048	1037	0.989504	PREDICTED: Lytechinus variegatus small subunit ribosomal RNA (LOC121405624), rRNA	1	0	0.995	TCTCAAAGATTAAGCCATGCACGTCTTCGTGCAAGCTCCTCGAGCGAAACTGCGGATGGCTCATTAAATCAGTTATGGTTCATTGGATCGAGTCCCCCGGACATGGATAACTGTGGTAATTCTAGAGCTAATACATGCGTCCAAGCGCCGACTCTCCAGAAGGCGTGCTTTTATTAGGAAAAAGACCAGCCCGGCTCCGACCGGTACCACTGGTGAACTCTGGATAACACAGCCGATCGCACGGCCCTCGCGCCGGCGACGGATCCTTCGAATGTCTGCCCTATCAACTTTCGATGGTACGTTATGCGCCTACCATGGTCGTCACGGGTAACGGAGAATCAGGGTTCGATTCCGGAGAGGGAGCCTGAGAAACGGCTACCACATCCAAGGAAGGCAG
Lv UM 10% FBS	487	1029	1010	0.981535	PREDICTED: Lytechinus variegatus small subunit ribosomal RNA (LOC121405624), rRNA	1	0	0.9975	TCTCAAAGATTAAGCCATGCATGTCTTCGTGCAAGCTCCTCGAGCGAAACTGCGGATGGCTCATTAAATCAGTTATGGTTCATTGGATCGAGTCCCCCGGACATGGATAACTGTGGTAATTCTAGAGCTAATACATGCGTCCAAGCGCTGACTCTCCAGAAGGCGTGCTTTTATTAGGAAAAAGACCAGCCCGGCTCCGGCCGGTACCACTGGTGAACTCTGGATAACACAGCCGATCGCACGGCCCTCGCGCCGGCGACGGATCCTTCGAATGTCTGCCCTATCAACTTTCGATGGTACGTTATGCGCCTACCATGGTCGTCACGGGTAACGGAGAATCAGGGTTCGATTCCGGAGAGGGAGCCTGAGAAACGGCTACCACATCCAAGGAAGGCAG
Lv UM 15% FBS	487	1165	1155	0.991416	PREDICTED: Lytechinus variegatus small subunit ribosomal RNA (LOC121405624), rRNA	1	0	0.9975	TCTCAAAGATTAAGCCATGCATGTCTTCGTGCAAGCTCCTCGAGCGAAACTGCGGATGGCTCATTAAATCAGTTATGGTTCATTGGATCGAGTCCCCCGGACATGGATAACTGTGGTAATTCTAGAGCTAATACATGCGTCCAAGCGCCGACTCTCCAGAAGGCGTGCTTTTATTAGGAAAAAGACCAGCCCGGCTCCGGCCGGTACCACTGGTGAACTCTGGATAACACAGCCGATCGCACGGCCCTCGCGCCGGCGACGGATCCTTCGAATGTCTGCCCTATCAACATTCGATGGTACGTTATGCGCCTACCATGGTCGTCACGGGTAACGGAGAATCAGGGTTCGATTCCGGAGAGGGAGCCTGAGAAACGGCTACCACATCCAAGGAAGGCAG
Lv UM 3% FBS	543	29713	29704	0.999697	PREDICTED: Lytechinus variegatus small subunit ribosomal RNA (LOC121405619), rRNA	1	0	0.9974	TAAGCCATGCATGTCTTCGTGCAAGCTCCTCGAGCGAAACTGCGGATGGCTCATTAAATCAGTTATGGTTCATTGGATCGAGTCCCCCGGACATGGATAACTGTGGTAATTCTAGAGCTAATACACGCGTCCAAGCGCCGACTCTCCAGAAGGCGTGCTTTTATTAGGAAAAAGACCAGCCCGGCTCCGGCCGGTACCACTGGTGAACTCTGGATAACACAGCCGATCGCACGGCCCTCGCGCCGGCGACGGATCCTTCGAATGTCTGCCCTATCAACTTTCGATGGTACGTTATGCGCCTACCATGGTCGTCACGGGTAACGGAGAATCAGGGTTCGATTCCGGAGAGGGAGCCTGAGAAACGGCTACCACATCCAAGG
Lv UM 5% FBS	543	38658	38655	0.999922	PREDICTED: Lytechinus variegatus small subunit ribosomal RNA (LOC121405619), rRNA	1	0	0.9974	TAAGCCATGCATGTCTTCGTGCAAGCTCCTCGAGCGAAACTGCGGATGGCTCATTAAATCAGTTATGGTTCATTGGATCGAGTCCCCCGGACATGGATAACTGTGGTAATTCTAGAGCTAATACATGCGTCCAAGCGCCGACTCTCCAGAAGGCGTGCTTTTATTAGGAAAAAGACCAGCCCGGCTCCGGCCGGTACCACTGGTGAACTCTGGATAACACAGCCGATCGCACGGCCCTCGCGCCGGCGACGGATCCTTCGAATGTCTGCCCTATCAACTTTCGATGGAACGTTATGCGCCTACCATGGTCGTCACGGGTAACGGAGAATCAGGGTTCGATTCCGGAGAGGGAGCCTGAGAAACGGCTACCACATCCAAG
Lv UM 10% FBS	543	19580	19579	0.999949	PREDICTED: Lytechinus variegatus small subunit ribosomal RNA (LOC121405619), rRNA	1	0	0.9974	TAAGCCATGCATGTCTTCGTGCAAGCTCCTCGAGCGAAACTGCGGATGGCTCATTAAATCAGTTATGGTTCATTGGATCGAGTCCCCCGGACATGGATAACTGTGGTAATTCTAGAGCTAATACATGCGTCCAAGCGCCGACTCTCCAGAAGGCGTGCTTTTATTAGGAAAAAGACCAGCCCGGCTCCGGCCGGTACCACTGGTGAACTCTGGATAACACAGCCGATCGCACGGCCCTCGCGCCGGCGACGGATCCTTCGAATGTCTGCCCTATCAACTTTCGATGGAACGTTATGCGCCTACCATGGTCGTCACGGGTAACGGAGAATCAGGGTTCGATTCCGGAGAGGGAGCCTGAGAAACGGCTACCACATCCAAG
Lv UM 15% FBS	543	18707	18707	1	PREDICTED: Lytechinus variegatus small subunit ribosomal RNA (LOC121405619), rRNA	1	0	0.9974	TAAGCCATGCATGTCTTCGTGCAAGCTCCTCGAGCGAAACTGCGGATGGCTCATTAAATCAGTTATGGTTCATTGGATCGAGTCCCCCGGACATGGATAACTGTGGTAATTCTAGAGCTAATACATGCGTCCAAGCGCCGACTCTCCAGAAGGCGTGCTTTTATTAGGAAAAAGACCAGCCCGGCTCCGGCCGGTACCACTGGTGAACTCTGGATAACACAGCCGATCGCACGGCCCTCGCGCCGGCGACGGATCCTTCGAATGTCTGCCCAATCAACTTTCGATGGTACGTTATGCGCCTACCATGGTCGTCACGGGTAACGGAGAATCAGGGTTCGATTCCGGAGAGGGAGCCTGAGAAACGGCTACCACATCCAAGG
Lv UM 3% FBS	857	4228	4228	1	PREDICTED: Lytechinus variegatus small subunit ribosomal RNA (LOC121405619), rRNA	1	0	0.9974	TAAGCCATGCATGTCTTCGTGCAAGCTCCTCGAGCGAAACTGCGGATGGCTCATTAAATCAGTTATGGTTCATTGGATCGAGTCCCCCGGACATGGATAACTGTGGTAATTCTAGAGCTAATACACGCGTCCAAGCGCCGACTCTCCAGAAGGCGTGCTTTTATTAGGAAAAAGACCAGCCCGGCTCCGGCCGGTACCACTGGTGAACTCTGGATAACACAGCCGATCGCACGGCCCTCGCGCCGGCGACGGATCCTTCGAATGTCTGCCCTATCAACTTTCGATGGTACGTTATGCGCCTACCATGGTCGTCACGGGTAACGGAGAATCAGGGTTCGATTCCGGAGAGGGAGCCTGAGAAACGGCTACCACATCCAAGG
LV UM 5% FBS	857	42635	42632	0.99993	PREDICTED: Lytechinus variegatus small subunit ribosomal RNA (LOC121405619), rRNA	1	0	0.9974	TAAGCCATGCATGTCTTCGTGCAAGCTCCTCGAGCGAAACTGCGGATGGCTCATTAAATCAGTTATGGTTCATTGGATCGAGTCCCCCGGACATGGATAACTGTGGTAATTCTAGAGCTAATACATGCGTCCAAGCGCCGACTCTCCAGAAGGCGTGCTTTTATTAGGAAAAAGACCAGCCCGGCTCCGGCCGGTACCACTGGTGAACTCTGGATAACACAGCCGATCGCACGGCCCTCGCGCCGGCGACGGATCCTTCGAATGTCTGCCCTATCAACTTTCGATGGAACGTTATGCGCCTACCATGGTCGTCACGGGTAACGGAGAATCAGGGTTCGATTCCGGAGAGGGAGCCTGAGAAACGGCTACCACATCCAAG
LV UM 10% FBS	857	15607	15604	0.999808	PREDICTED: Lytechinus variegatus small subunit ribosomal RNA (LOC121405619), rRNA	1	0	0.9974	TAAGCCATGCATGTCTTCGTGCAAGCTCCTCGAGCGAAACTGCGGATGGCTCATTAAATCAGTTATGGTTCATTGGATCGAGTCCCCCGGACATGGATAACTGTGGTAATTCTAGAGCTAATACATGCGTCCAAGCGCCGACTCTCCAGAAGGCGTGCTTTTATTAGGAAAAAGACCAGCCCGGCTCCGGCCGGTACCACTGGTGAACTCTGGATAACACAGCCGATCGCACGGCCCTCGCGCCGGCGACGGATCCTTCGAATGTCTGCCCTATCAACTTTCGATGGAACGTTATGCGCCTACCATGGTCGTCACGGGTAACGGAGAATCAGGGTTCGATTCCGGAGAGGGAGCCTGAGAAACGGCTACCACATCCAAG
LV UM 15% FBS	857	11639	11638	0.999914	PREDICTED: Lytechinus variegatus small subunit ribosomal RNA (LOC121405619), rRNA	1	0	0.9974	TAAGCCATGCATGTCTTCGTGCAAGCTCCTCGAGCGAAACTGCGGATGGCTCATTAAATCAGTTATGGTTCATTGGATCGAGTCCCCCGGACATGGATAACTGTGGTAATTCTAGAGCTAATACATGCGTCCAAGCGCCGACTCTCCAGAAGGCGTGCTTTTATTAGGAAAAAGACCAGCCCGGCTCCGGCCGGTACCACTGGTGAACTCTGGATAACACAGCCGATCGCACGGCCCTCGCGCCGGCGACGGATCCTTCGAATGTCTGCCCAATCAACTTTCGATGGTACGTTATGCGCCTACCATGGTCGTCACGGGTAACGGAGAATCAGGGTTCGATTCCGGAGAGGGAGCCTGAGAAACGGCTACCACATCCAAGG
Lv UM 3% FBS	1012	9035	9035	1	PREDICTED: Lytechinus variegatus small subunit ribosomal RNA (LOC121405619), rRNA	1	0	0.9974	TAAGCCATGCATGTCTTCGTGCAAGCTCCTCGAGCGAAACTGCGGATGGCTCATTAAATCAGTTATGGTTCATTGGATCGAGTCCCCCGGACATGGATAACTGTGGTAATTCTAGAGCTAATACACGCGTCCAAGCGCCGACTCTCCAGAAGGCGTGCTTTTATTAGGAAAAAGACCAGCCCGGCTCCGGCCGGTACCACTGGTGAACTCTGGATAACACAGCCGATCGCACGGCCCTCGCGCCGGCGACGGATCCTTCGAATGTCTGCCCTATCAACTTTCGATGGTACGTTATGCGCCTACCATGGTCGTCACGGGTAACGGAGAATCAGGGTTCGATTCCGGAGAGGGAGCCTGAGAAACGGCTACCACATCCAAGG
LV UM 5% FBS	1012	11523	11522	0.999913	PREDICTED: Lytechinus variegatus small subunit ribosomal RNA (LOC121405619), rRNA	1	0	0.9974	TAAGCCATGCATGTCTTCGTGCAAGCTCCTCGAGCGAAACTGCGGATGGCTCATTAAATCAGTTATGGTTCATTGGATCGAGTCCCCCGGACATGGATAACTGTGGTAATTCTAGAGCTAATACATGCGTCCAAGCGCCGACTCTCCAGAAGGCGTGCTTTTATTAGGAAAAAGACCAGCCCGGCTCCGGCCGGTACCACTGGTGAACTCTGGATAACACAGCCGATCGCACGGCCCTCGCGCCGGCGACGGATCCTTCGAATGTCTGCCCTATCAACTTTCGATGGAACGTTATGCGCCTACCATGGTCGTCACGGGTAACGGAGAATCAGGGTTCGATTCCGGAGAGGGAGCCTGAGAAACGGCTACCACATCCAAG
LV UM 10% FBS	1012	12720	12720	1	PREDICTED: Lytechinus variegatus small subunit ribosomal RNA (LOC121405619), rRNA	1	0	0.9974	TAAGCCATGCATGTCTTCGTGCAAGCTCCTCGAGCGAAACTGCGGATGGCTCATTAAATCAGTTATGGTTCATTGGATCGAGTCCCCCGGACATGGATAACTGTGGTAATTCTAGAGCTAATACATGCGTCCAAGCGCCGACTCTCCAGAAGGCGTGCTTTTATTAGGAAAAAGACCAGCCCGGCTCCGGCCGGTACCACTGGTGAACTCTGGATAACACAGCCGATCGCACGGCCCTCGCGCCGGCGACGGATCCTTCGAATGTCTGCCCTATCAACTTTCGATGGAACGTTATGCGCCTACCATGGTCGTCACGGGTAACGGAGAATCAGGGTTCGATTCCGGAGAGGGAGCCTGAGAAACGGCTACCACATCCAAG
LV UM 15% FBS	1012	10812	10812	1	PREDICTED: Lytechinus variegatus small subunit ribosomal RNA (LOC121405619), rRNA	1	0	0.9974	TAAGCCATGCATGTCTTCGTGCAAGCTCCTCGAGCGAAACTGCGGATGGCTCATTAAATCAGTTATGGTTCATTGGATCGAGTCCCCCGGACATGGATAACTGTGGTAATTCTAGAGCTAATACATGCGTCCAAGCGCCGACTCTCCAGAAGGCGTGCTTTTATTAGGAAAAAGACCAGCCCGGCTCCGGCCGGTACCACTGGTGAACTCTGGATAACACAGCCGATCGCACGGCCCTCGCGCCGGCGACGGATCCTTCGAATGTCTGCCCAATCAACTTTCGATGGTACGTTATGCGCCTACCATGGTCGTCACGGGTAACGGAGAATCAGGGTTCGATTCCGGAGAGGGAGCCTGAGAAACGGCTACCACATCCAAGG

## Sheet: Lv Ovary Cells 18S
Table S3. Genetic validation of L. variegatus ovary cell cultures with 18S targeted amplicon sequencing
Sample ID	Days in Culture	Number of merged paired-end reads	Number of merged reads that form the predominant read	Percent of reads that form the predominant read	Top blast hit from merged_uniq0.9.fasta file	Query Cover	E-value	Percent Identity	Sequence Output
Ovary1	135	947	946	0.998944	PREDICTED: Lytechinus variegatus small subunit ribosomal RNA (LOC121405624), rRNA	1	0	0.9973	TAAGCCATGCATGTCTTCGTGCAAGCTCCTCGAGCGAAACTGCGGATGGCTCATTAAATCAGTTATGGTTCATTGGATCGAGTCCCCCGGACATGGATAACTGTGGTAATTCTAGAGCTAATACATGCGTCCAAGCGCCGACTCTCCAGAAGGCGTGCTTTTATTAGGAAAAAGACCAGCCCGGCTCCGGCCGGTACAACTGGTGAACTCTGGATAACACAGCCGATCGCACGGCCCTCGCGCCGGCGACGGATCCTTCGAATGTCTGCCCTATCAACTTTCGATGGTACGTTATGCGCCTACCATGGTCGTCACGGGTAACGGAGAATCAGGGTTCGATTCCGGAGAGGGAGCCTGAGAAACGGCTACCACATCCA
Ovary 2 - OVA-F flask	135	56	50	0.892857	PREDICTED: Lytechinus variegatus small subunit ribosomal RNA (LOC121405624), rRNA	1	0	0.9947	TAAGCCATGCATGTCTTCGTGCAAGCTCCTCGAGCGAAACTGCGGATGGCCCATTAAATCAGTTATGGTTCATTGGATCGAGTCCCCCGGACATGGATAACTGTGGTAATTCTAGAGCTAATACATGCGTCCAAGCGCCGACTCTCCAGAAGGCGTGCTTTTATTAGGAAAAAGACCAGCCCGGCTCCGGCCGGTACCACTGGTGAACTCTGGATAACACAGCCGATCGCACGGCCCTCGCGCCGGCGACGGATCCTTCGAATGTCTGCCCTATCAACTTTCGATGGTACGTTATGCGCCTACCATGGTCGTAACGGGTAACGGAGAATCAGGGTTCGATTCCGGAGAGGGAGCCTGAGAAACGGCTACCACATCCAAGG
Ovary 2 OVA-P plate	135	35	34	0.971429	PREDICTED: Lytechinus variegatus small subunit ribosomal RNA (LOC121405624), rRNA	1	0	0.9947	TAAGCCATGCATGTCTTCGTGCAAGCTCCTCGAGCGAAACTGCGGATGGCTCATTAAATCAGTTATGGTCCATTGGATCGAGTCCCCCGGACATGGATAACTGTGGTAATTCTAGAGCTAATACATGCGTCCAAGCGCCGACTCTCCAGAAGGCGTGCTTTTATTAGGAAAAAGACCGGCCCGGCTCCGGCCGGTACCACTGGTGAACTCTGGATAACACAGCCGATCGCACGGCCCTCGCGCCGGCGACGGATCCTTCGAATGTCTGCCCTATCAACTTTCGATGGTACGTTATGCGCCTACCATGGTCGTCACGGGTAACGGAGAATCAGGGTTCGATTCCGGAGAGGGAGCCTGAGAAACGGCTACCACATCCAAGG
Lv Ovary 7	112	16049	16047	0.999875	PREDICTED: Lytechinus variegatus small subunit ribosomal RNA (LOC121405619), rRNA	1	0	0.9947	TAAGCCTTGCATGTCTTCGTGCAAGCTCCTCGAGCGAAACTGCGGATGGCTCATTAAATCAGTTATGGTTCATTGGATCG AGTCCCCCGGACATGGATAACTGTGGTAATTCTAGAGCTAATACATGCGTCCAAGCGCCGACTCTCCAGAAGGCGTGCTT TTATTAGGAAAAAGACCAGCCCGGCTCCGGCCGGTACCACTGGTGAACTCTGGATAACACAGCCGATCGCACGACCCTCG CGCCGGCGACGGATCCTTCGAATGTCTGCCCTATCAACTTTCGATGGTACGTTATGCGCCTACCATGGTCGTCACGGGTA ACGGAGAATCAGGGTTCGATTCCGGAGAGGGAGCCTGAGAAACGGCTACCACATCCAAGG

## Sheet: Sp cells 18S
Table S3. Genetic validation of S. purpuratus embryo cell cultures with 18S targeted amplicon sequencing
Sample ID	Days in Culture	Number of merged paired-end reads	Number of merged reads that form the predominant read	Percent of reads that form the predominant read	Top blast hit from merged_uniq0.9.fasta file	Query Cover	E-value	Percent Identity	Sequence Output
Sp-G1 10% FBS	58	22939	22939	1	PREDICTED: Strongylocentrotus purpuratus small subunit ribosomal RNA (LOC115922030), rRNA	1	0	0.9974	TAAGCCATGCATGTCTAAGTACAAGCTCGTCTCGAGCGAAACTGCGGATGGCTCATTAAATCAGCTATGGTTCATTGGAT CGAGTCCCCCCGACATGGATAACTGTGGTAATTCTAGAGCTAATACATGCGTCCAAGCGCCGACTTTCCAGAAGGCGTGC TTTTATTAGGAACAAGACCAGCCCGGTCTCGGCCGGCCACACTGGTGAACTCTGGATAACACAGCCGATCGCACGGTCTT TGCACCGGCGACGGATCCTTCGAATGTCTGCCCTATCAACTTTCGATGGTACGTTATGCGCCTACCATGGTCGTCACGGG TAACGGAGAATCAGGGTTCGATTCCGGAGAGGGAGCCTGAGAAACGGCTACCACATCCAAGG
Sp-G2 10% FBS	58	31797	31797	1	PREDICTED: Strongylocentrotus purpuratus small subunit ribosomal RNA (LOC115922030), rRNA	1	0	0.9974	TAAGCCATGCATGTCTAAGTACAAGCTCGTCTCGAGCGAAACTGCGGATGGCTCATTAAATCAGTTATGGTTCATTGGAT CGAGTCCCCCCGACATGGATAACTGTGGTAATTCTAGAGCTAATACATGCGTCCAAGCGCCGACTTTCCAGAAGGCGTGC TTTTATTAGGAACAAGACCAGCCCGGTCTCGGCCGGCCACACTGGTGAACTCTGGATAACACAGCCGATCGCACGGTCTT TGCACCGGCGACGGATCCTTCGAATGTCTGCCCTATCAACTTTCGATGGTACGTTATGCGCCTACCATGGTCGTCACGGG TAACGGAGAATCAGGGTTCGATTCCGGAGAGGGAGCCTGAGAAACGGCCACCACATCCAAGG
Sp-G1 15% FBS	58	6731	6731	1	PREDICTED: Strongylocentrotus purpuratus small subunit ribosomal RNA (LOC115922030), rRNA	1	0	0.9948	TAAGCCATGCATGTCTAAGTACAAGCTCGTCTCGGGCGAAACTGCGGATGGCTCATTAAATCAGTTATGGTTCATTGGAT CGAGTCCCCTCGACATGGATAACTGTGGTAATTCTAGAGCTAATACATGCGTCCAAGCGCCGACTTTCCAGAAGGCGTGC TTTTATTAGGAACAAGACCAGCCCGGTCTCGGCCGGCCACACTGGTGAACTCTGGATAACACAGCCGATCGCACGGTCTT TGCACCGGCGACGGATCCTTCGAATGTCTGCCCTATCAACTTTCGATGGTACGTTATGCGCCTACCATGGTCGTCACGGG TAACGGAGAATCAGGGTTCGATTCCGGAGAGGGAGCCTGAGAAACGGCTACCACATCCAAGG
Sp-G2 15% FBS	58	6017	6017	1	PREDICTED: Strongylocentrotus purpuratus small subunit ribosomal RNA (LOC115922030), rRNA	1	0	0.9974	TAAGCCATGCATGTCTAAGTACAAGCTCGTCTCGAGCGAAACTGCGGATGGCTCATTAAATCAGTTATGGTTCATTGGAT CGAGTCCCCCCGACATGGATAACTGTGGTAATTCTAGAGCTAATACATGCGTCCAAGCGCCGACTTTCCAGAAGGCGTGC TTTTATTAGGAACAAGACCAGCCCGGTCTCGGCCGGCCACACTGGTGAACTCTGGATAACACAGCCGATCGCACGGTCTT TGCACCGGCGACGGATCCTTCGAATGTCTGCCCTATCAACTTTCGATGGTACGTTATGCGCCTACCATGGTCGTCACGGG TAACGGAGAATCAGGGTTCGATGCCGGAGAGGGAGCCTGAGAAACGGCTACCACATCCAAGG
