# Supplementary material for: Genetically tractable embryonic cell lines from sea urchins
Source: Research Square preprint supplement (doi:10.21203/rs.3.rs-5665288/v1), 2025-01-15
Supplement: Supplementary file 5 [file 7e5731d13994801dedb9f77d.xlsx]

## Sheet: Cryopres Results Summary
Table S5. Cryopreservation of L. variegatus cultured cells - summary of conditions tested and results
	Notes about each experiment	Freezing Media Tested	# of cells frozen	Volume of Freezing Media	Media revived in	Day of 1st count	1st Count		2nd Count		3rd Count		4th Count		5th Count		6th Count
							Percent Viability	Cumulative Population Doubling	Percent Viability	Cumulative Population Doubling	Percent Viability	Cumulative Population Doubling	Percent Viability	Cumulative Population Doubling	Percent Viability	Cumulative Population Doubling	Percent Viability	Cumulative Population Doubling
Experiment 1: Initial experiment with a traditional CPA (DMSO)		10% DMSO in Urchin Media with 15% FBS, Day 264	4000000		UM + 5% FBS	4	79.14	0	64.36	0	52.56	0	60.87	0.03	52.38	0.03	41.46	0.03
		10% DMSO in Urchin Media with 15% FBS, Day 279	4000000		UM + 5% FBS	4	72.03	0	66.67	0	67.62	0	68.15	1.37	47.06	1.37	33.33	1.37
		10% DMSO in Urchin Media with 15% FBS, Day 169	5500000		UM + 15% FBS	4	85.29	0	72.73	0	64	0	63.89	0.11	71.05	0.11	36.36	0.11
Experiment 2: Testing additional CPAs and freezing media	Test commercial serum free freezing media	Bambankers (serum free, 10% DMSO)	1000000	500 ul	UM + 5% FBS	7	84.38	0	52.63	0	57.14	0
		Bambankers Direct (serum free, 10% DMSO)	1000000	1000 ul	UM + 5% FBS	7	52.63	0	77.78	0	59.09	0
	Use FBS instead of media to reduce the amount of water. Glycerol was also tested because it is less toxic than DMSO	90% FBS + 10% DMSO	1250000	1000 ul	UM + 5% FBS	7	77.78	0	80	0	46.15	0
		90% FBS + 10% Glycerol	1250000	1000 ul	UM + 5% FBS	7	70	0	68	0	68	0
Experiment 3: repeat experiment 2 with more cells	commercial serum free freezing media	Bambankers (serum free, 10% DMSO)	3000000	500 ul	UM + 5% FBS	7	82.35	0	53.33	0	92.31	0
		Bambankers Direct (serum free, 10% DMSO)	3000000	1000 ul	UM + 5% FBS	7	75.56	0	70.73	0	68.42	0
	Use FBS instead of media to reduce the amount of water. Glycerol was also tested because it is less toxic than DMSO	90% FBS + 10% DMSO	3000000	1000 ul	UM + 5% FBS	7	78.95	0	86.67	0	66.67	0
		90% FBS + 10% Glycerol	3000000	1000 ul	UM + 5% FBS	7	66.67	0	50	0	33.33	0
Experiment 4: Test ethylene glycol and DMSO in varying concentrations. The initial idea was to test non-penetrating and penetrating together but did not have PEG so tried EG	Test EG with the normal concentration of DMSO	10% Ethylene glycol (EG) + 10% DMSO in FBS	4000000	500 ul	UM + 15% FBS	4	74.49	0	44.66	0	13.43	0
	Test EG with higher concentration of DMSO	10% Ethylene glycol (EG) + 25% DMSO in FBS	4000000	500 ul	UM + 15% FBS	4	53.67	0	50	0	16.46	0
	Add non-penetrating CPA (sucrose) to penetrating CPAs which is supposed to help during thawing	10% Ethylene glycol (EG) + 10% DMSO + 0.6M Sucrose in FBS	4000000	500 ul	UM + 15% FBS	4	45.96	0	50	0	25	0
	Increase the concentration of both EG and DMSO	25% Ethylene glycol (EG) + 25% DMSO in FBS	4000000	500 ul	UM + 15% FBS	4	57.81	0	100	0	100	0
Experiment 5: Replicate 10% EG + 25% DMSO condition based on positive previous results	Replicate 10% EG + 25% DMSO condition with more cells	10% Ethylene glycol (EG) + 25% DMSO in FBS	8000000	500 ul	UM + 15% FBS	4	58.37	0	50.68	1.3	44.44	2.22	30.77	2.22
	Replicate 10% EG + 25% DMSO condition	10% Ethylene glycol (EG) + 25% DMSO in FBS	4000000	500 ul	UM + 15% FBS	4	100	0	33.33	0	18.75	0	21.95	0
Experiment 6: Test penetrating and non-penetrating CPAs	Modified from Odintsova et al 2015	1M DMSO + 15mg/mL Trehalose in Urchin Media with 15% FBS	5400000	1200 ul	UM + 15% FBS	4	32.33	0	41.41	0.3	15.57	0.3
		5% DMSO + 5% PEG in Urchin Media with 15% FBS	5400000	1200 ul	UM + 15% FBS	2	23.53	0	15.09	0	16.09	0.81	8.99	0.81
		10% DMSO + 10% PEG in Urchin Media with 15% FBS	5400000	1200 ul	UM + 15% FBS	2	24.49	0	19.08	0.46	12.55	0.46
		5% DMSO + 5% PEG + 200 mM Trehalose in 90% FBS	5000000	1200 ul	UM + 15% FBS	2	35.29	0	28.21	0	83.67	1.9	87.18	1.9	84	1.9
	Martinetti et al 2017	1M Trehalose in Basic Urchin Media with 90% FBS	5000000	1200 ul	UM + 15% FBS	3	37.5	0	27.87	0.5	84	1.81	82.5	1.81	82.86	1.81
	Zhang et al 2020	200 mM Trehalose + 10% Glycerol in 90% FBS	5000000	1200 ul	UM + 15% FBS	3	33.33	0	22.22	0	89.47	1.12	78.26	1.12	77.14	1.12
		200 mM Trehalose in 90% FBS	5000000	1200 ul	UM + 15% FBS	3	83.33	0	26.98	0	88.1	1.12	87.8	1.12	83.33	1.12
Experiment 7: Test L-proline CPA with and without pre-incubation L-proline is "Mother nature's cryopreotectant"	Proline has been used with success to cryopreserve mouse oocytes, vitrify red blood cells (RBCs) and mammalian cells, induce freeze-tolerance in fruit fly larvae, and has shown protection for mammalian cell monolayers when used alongside trehalose.	1M L-proline, 3M glycerol and 0.2M Trehalose	5125000	1000 ul	UM + 15% FBS	2	51.24	0	0	0
		1M L-proline, 1.5M DMSO and 0.2M Trehalose	5125000	1000 ul	UM + 15% FBS	2	55.21	0	0	0
	Pre-incubation in L-proline lead to increased post-thaw recover rate: Baily et al 2021	Pre-incubation in 1M L-proline in Urchin Media with 15% FBS for 24 hours Freeze in 1M L-proline, 3M glycerol and 0.2M Trehalose in Urchin Media with 15% FBS	5125000	1000 ul	UM + 15% FBS	2	55.97	0	0	0
		Pre-incubation in 1M L-proline in Urchin Media with 15% FBS for 24 hours Freeze in 1M L-proline, 1.5M DMSO and 0.2M Trehalose in Urchin Media with 15% FBS	5125000	1000 ul	UM + 15% FBS	2	31.65	0	0	0
		Pre-incubation in 1M L-proline in Urchin Media with 15% FBS for 24 hours 10% DMSO in Urchin Media with 15% FBS	5125000	1000 ul	UM + 15% FBS	2	71.1	0	0	0
Experiment 8: Try fast freezing (vitrification) instead of slow freezing	Modified from Magalhaes et al 2008	Vitrification - VSA media (See adjacent tab in this speadsheet for details)	1500000	500 ul	UM + 15% FBS	6	87.83	0.75	79.25	0.75	48.19	0.75
		Vitrification - VSB media (See adjacent tab in this speadsheet for details)	1500000	500 ul	UM + 15% FBS	6	92.31	0.49	74.58	0.49	52.46	0.49

## Sheet: ListCryopresMedia
Table S5. Cryopreservation of L. variegatus cultured cells - list of cryopreservation media tested
Cryoprotectants (CPA) Tested	Penetrating (P) vs Non-penetrating(NP) CPAs	Number of Cells Cryopreserved	Volume of Freezing Media (mL)
10% DMSO in Urchin Media with 15% FBS	P	3-5x10^6	1
Bambankers (10% DMSO)	P	1x10^6	1
Bambankers Direct (serum free, 10% DMSO)	P	1x10^6	equal volume of media to cells in media
90% FBS + 10% DMSO	P	1.25x10^6	1
90% FBS + 10% Glycerol	P	1.25x10^6	1
10% Ethylene glycol + 25% DMSO in FBS	P	4x10^6	0.5
10% Ethylene glycol + 10% DMSO in FBS	P	4x10^6	0.5
25% Ethylene glycol + 25% DMSO in FBS	P	4x10^6	0.5
25% DMSO and 10% Ethylene Glycol in FBS	P	4x10^6	0.5
10% Ethylene glycol + 10% DMSO + 0.6M Sucrose in FBS	P, NP	4x10^6	0.5
1M DMSO + 15mg/mL Trehalose in Urchin Media with 15% FBS	P, NP	5x10^6	1.2
5% DMSO + 5% PEG in Urchin Media with 15% FBS	P, NP	5x10^6	0.6
10% DMSO + 10% PEG in Urchin Media with 15% FBS	P, NP	5x10^6	0.6
5% DMSO + 5% PEG + 200 mM Trehalose in 90% FBS	P, NP	5x10^6	0.5
1M Trehalose in Basic Urchin Media with 90% FBS	NP	5x10^6	0.5
200 mM Trehalose + 10% Glycerol in 90% FBS	P, NP	5x10^6	0.5
200 mM Trehalose in 90% FBS	NP	5x10^6	0.5
1M L-proline, 3M glycerol and 0.2M Trehalose	P, NP	5x10^6	1
1M L-proline, 1.5M DMSO and 0.2M Trehalose	P, NP	5x10^6	1
Pre-incubation in 1M L-proline in Urchin Media with 15% FBS for 24 hours Freeze in 1M L-proline, 3M glycerol and 0.2M Trehalose in Urchin Media with 15% FBS	P, NP	5x10^6	1
Pre-incubation in 1M L-proline in Urchin Media with 15% FBS for 24 hours Freeze in 1M L-proline, 1.5M DMSO and 0.2M Trehalose in Urchin Media with 15% FBS	P, NP	5x10^6	1
Pre-incubation in 1M L-proline in Urchin Media with 15% FBS for 24 hours Freeze in 10% DMSO in Urchin Media with 15% FBS	P, NP	5x10^6	1
Vitrification solution A (VSA; See table x for details)		5x10^6	0.5
Vitrification solution B (VSB; See table x for details)		5x10^6	0.5

## Sheet: VitrificationMedia
Table S5. Cryopreservation of L. variegatus cultured cells - vitrification media tested
	1 M Sucrose
Sucrose	17.115 g
Basic Urchin Media	50 mL
	0.4 M Sucrose
1 M Sucrose	4 mL
Basic Urchin Media	6 mL
Equilibration Solution 1 (ES1)
	1 rxn	Final Concentration
Ethylene Glycol	100 µl	10%
Media	900 µl
Total Volume	1 mL
Equilibration Solution 2 (ES2)
	1 rxn	Final Concentration
Ethylene Glycol	250 µl	25%
Media	750 µl
Total Volume	1 mL
Vitrification Solution A (VSA)
	1 rxns	Final Concentration
Ethylene Glycol	200 µL	10%
1 M Sucrose	300 µL	0.6 M
Total Volume	500 µl
Vitrification Solution B (VSB)
	1 rxns	Final Concentration
Ethylene Glycol	100 µL	20%
1,2 Propanediol	80 µL	16%
1 M Sucrose	300 µL	0.6 M
Media	20 µL
Total Volume	500 µL
