# Supplementary material for: Genetically tractable embryonic cell lines from sea urchins
Source: Research Square preprint supplement (doi:10.21203/rs.3.rs-5665288/v1), 2025-01-15
Supplement: Supplementary file 6 [file 9e28f4c3138b11eff1dd572e.xlsx]

## Sheet: Lv_FBStimecourseAll_noZeros_TPM
Table S7. Transcriptional changes in the L. variegatus embryonic cell cultures assessed by bulk RNA-Seq on Day 20, 182, 313, 445, and 738 (Transcripts per million for all genes with detectable expression)
FeatureName	FBS5_D20_TPM	FBS5_D182_TPM	FBS5_D313_TPM	FBS5_D445_TPM	FBS5_D738_TPM	FBS10_D20_TPM	FBS10_D182_TPM	FBS10_D313_TPM	FBS10_D445_TPM	FBS10_D738_TPM	FBS15_D20_TPM	FBS15_D182_TPM	FBS15_D313_TPM	FBS15_D445_TPM	FBS15_D738_TPM	Annotation
LOC100134945	0	7.33866	2.98527	8.31539	2.23906	0	0	8.75912	0	12.5515	14.7335	5.35124	39.0357	2.49073	6.35988	mortalin
LOC100134946	0	3.16945	3.86786	4.30953	0	2.78433	0	1.41859	0	2.7104	0	0	0	0	1.37336	PAPS_synthetase-like
LOC100134947	3.83564	17.7476	0	0	0	11.6933	0	7.94355	0	0	3.81761	0	0	0	19.2257	SoxE
LOC100500774	0.864693	0	1.22065	0	1.83106	0	0	0.895382	1.80891	0	0	0	2.81671	0	0.866834	forkhead_transcription_factor_N2/3
LOC121405556	0	0	0	1.4503	0	0	2.47485	0	1.92897	0	0	0	0	0	0	zinc_transporter_9-like
LOC121405557	0	3.0085	0	1.02267	0	0	1.74513	0	0.680103	0	0	0	0	0	0	rho_GTPase-activating_protein_24-like
LOC121405560	0	0	0	4.22515	11.3769	0	0	0	0	0	0	0	0	0	0	uncharacterized_LOC121405560
LOC121405562	1234.32	1095.94	649.881	430.257	127.157	1111.93	738.683	176.174	71.5328	125.401	1268.36	561.368	141.27	90.3705	13.377	uncharacterized_LOC121405562
LOC121405563	0	0.93529	1.14139	5.72276	0	0	0	1.67448	0	0.799828	0.804743	0	0	0	0	histone_acetyltransferase_KAT6A-like
LOC121405564	450.228	1070.28	688.046	282.608	699.742	386.165	748.323	633.016	79.9289	600.642	324.778	1165.42	403.653	296.763	66.2522	uncharacterized_LOC121405564
LOC121405568	0	39.4691	0	20.125	6.02109	0	11.4473	8.83287	5.94826	14.0636	5.66001	17.9877	3.0874	0	0	nuclear_receptor_coactivator_4-like
LOC121405570	0	0	0	4.05501	0	0	0	0	0	0	0	6.52384	0	0	15.507	uncharacterized_LOC121405570
LOC121405573	0	0	14.2704	7.94995	0	0	27.1322	0	0	9.99995	0	0	21.953	0	0	ubiquitin-conjugating_enzyme_E2-17_kDa-like
LOC121405576	0	1.43758	1.75436	0	0	0	0	0	0	0	0	0	0	0	0	collagen_alpha-2(IX)_chain-like
LOC121405578	0	14.191	4.32953	0	0	0	0	0	0	0	0	0	0	10.8369	0	uncharacterized_LOC121405578
LOC121405581	0	0	1.97406	3.29921	7.40307	1.42105	0	0	0	0	0	0	7.59206	0	0	bone_morphogenetic_protein_1_homolog
LOC121405582	0	1.90302	0	1.29378	3.48372	0	0	1.70353	0	3.2548	0	0	0	0	1.64921	protein_transport_protein_Sec24C-like
LOC121405583	0	0	10.2898	0	0	0	0	0	0	0	0	0	0	0	0	pituitary_homeobox_x-like
LOC121405584	0	0	0	17.2332	0	0	0	0	0	0	0	0	0	0	0	uncharacterized_LOC121405584
LOC121405585	44.6475	27.8095	4.84822	0	0	45.3707	4.60895	0	0	30.5765	64.9471	21.7267	0	0	3.44292	steroid_17-alpha-hydroxylase/17,20_lyase-like
LOC121405586	0	1.41695	3.45838	0	1.29695	0	0	0	0.640633	2.42346	0	3.09966	0	1.44274	1.22797	ras-GEF_domain-containing_family_member_1B-like
LOC121405587	1282.58	3751.2	1162.33	1606.37	2752.85	1004.07	2783.67	826.372	319.655	852.098	1052.76	3317.64	529.551	2439.38	377.789	uncharacterized_LOC121405587
LOC121405590	0	0	0	0.985799	1.32721	0	0	0	0	0	0	0	1.3611	0	5.02648	NACHT_domain-_and_WD_repeat-containing_protein_1-like
LOC121405598	0	0	0	3.36412	0	0	0	0	0	0	0	0	0	0	0	galanin_receptor_type_1-like
LOC121405605	0	2.78899	0	0	0	3.67516	0	7.48985	1.26096	1.19253	0	1.52527	1.30898	0	1.20851	Golgi-specific_brefeldin_A-resistance_guanine_nucleotide_exchange_factor_1-like
LOC121405606	2.08375	14.4624	0	2.45808	5.51566	2.11751	11.1855	1.07885	3.26937	5.15322	3.11093	2.63643	1.13129	0	0	eukaryotic_translation_initiation_factor_4E-binding_protein_2-like
LOC121405607	0	0	1.41567	2.36599	0	0	0	0	0.524481	3.96813	0.998129	0	0	0	0	maternal_embryonic_leucine_zipper_kinase-like
LOC121405610	0	0	0	2.93727	0	0	0	0	0	3.69468	0	0	12.1665	0	0	uncharacterized_LOC121405610
LOC121405613	0	81.1609	0	137.944	0	35.6496	0	0	183.473	208.218	0	0	38.092	371.87	35.1681	small_nucleolar_RNA_U3
LOC121405624	0	0	0	39.9248	35.8348	51.5898	0	13.1423	0	0	8.42144	21.4109	0	0	106.027	small_subunit_ribosomal_RNA
LOC121405653	0	14.4038	0	0	0	0	0	0	0	0	0	0	0	14.6659	0	interferon_alpha-inducible_protein_27-like_protein_2A
LOC121405654	0	19.257	0	0	13.2197	0	5.58517	0	4.35325	32.9359	0	10.5314	0	4.90186	8.34433	interferon_alpha-inducible_protein_27-like_protein_1
LOC121405660	0	0.93215	0	0	0	0	0	0	0.421444	0	0	0	0	1.89823	0	trichohyalin-like
LOC121405662	0	4.30995	0	0	0	0	0	11.5744	0	0	0	0	0	0	0	lysosomal_acid_phosphatase-like
LOC121405663	0	0	0	36.3974	0	0	0	0	0	0	0	14.6394	0	47.6972	0	uncharacterized_LOC121405663
LOC121405665	0	1.9067	0	1.29628	0	0	8.84808	0	1.72412	0	1.64056	0	1.78978	0	0	gamma-aminobutyric_acid_type_B_receptor_subunit_2-like
LOC121405666	27.6559	63.9822	0	52.1984	5.85637	50.587	14.8455	0	17.3566	0	27.5258	13.9964	0	6.51464	0	GDP-L-fucose_synthase-like
LOC121405668	3.80525	48.4192	0	32.9181	28.2028	15.4676	40.8528	0	3.98024	26.3495	22.7241	4.81453	0	0	0	muscarinic_acetylcholine_receptor_M3-like
LOC121405671	7.78399	11.2552	0	33.6685	18.5437	13.8427	2.61151	6.04519	26.4613	28.8752	9.68423	17.235	2.11301	9.16803	3.90163	uncharacterized_protein_K02A2.6-like
LOC121405674	0	0	4.44669	0	0	0	0	3.26178	0	0	0	0	0	0	0	myoblast_determination_protein_1_homolog
LOC121405677	0.918885	0	1.29715	0	0.972909	0	6.16566	0.951497	0.48057	0	0.914564	1.1626	0	0	0	SH3_and_multiple_ankyrin_repeat_domains_protein_3-like
LOC121405678	0	3.01463	0	0	0	0	0	0	0	0	0	0	0	0	0	uncharacterized_LOC121405678
LOC121405682	1.28561	17.8456	3.62968	7.07726	23.1403	0	1.72527	0	9.4131	15.261	0	6.50638	4.18783	12.1136	5.15517	ras-related_protein_Rab-21-like
LOC121405684	2.59759	0	1.2223	0.680938	1.83354	0	1.16198	0.896593	1.35852	0	0	0	0	0	0	uncharacterized_LOC121405684
LOC121405685	0	0	19.2466	0	0	0	0	0	0	0	0	0	7.40209	0	0	trans-1,2-dihydrobenzene-1,2-diol_dehydrogenase-like
LOC121405692	0	3.21183	15.6783	0	0	4.23234	1.86307	1.43756	0	0	5.52705	0	6.02975	3.27027	0	inner_centromere_protein_A-like
LOC121405693	0	0	0	1.39731	0	0	0	1.83984	0	0	0	0	0	0	0	coatomer_subunit_beta-like
LOC121405694	219.379	73.404	149.725	24.2391	125.737	260.702	124.088	62.8928	2.37053	36.7668	278.799	100.933	38.3887	73.672	12.7228	uncharacterized_LOC121405694
LOC121405695	204.077	223.857	0	38.7394	5.58816	119.782	221.928	0	1.84019	10.4419	99.8077	60.0994	0	47.6582	12.3455	epidermal_growth_factor_receptor-like
LOC121405697	0	1.77299	1.08184	1.20538	0.811421	0	0	0	0	0.758101	0	0.969629	0	0	0	anoctamin-4-like
LOC121405698	0	5.23696	0	7.12075	19.1738	0	12.1511	0	4.73547	8.95694	9.01198	11.4561	0	0	0	uncharacterized_LOC121405698
LOC121405699	0	0	0	6.64682	0	0	0	0	0	0	0	0	0	9.95472	16.9457	UDP-glucuronosyltransferase_2B33-like
LOC121405700	0	2.62933	0	0	0	0	0	0	0	0	4.52466	0	0	0	0	uncharacterized_LOC121405700
LOC121405701	0	0	7.47964	0	0	0	0	2.74327	0	0	2.63678	0	0	0	0	tubby-related_protein_3-like
LOC121405703	1.88674	2.1825	0	0	0	0	0	0	0	0	0	0	0	0	0	uncharacterized_LOC121405703
LOC121405704	2.43306	4.69076	0	0.637809	4.29352	2.47248	6.53028	5.03883	1.69663	2.40683	0	0	0.880624	1.91045	7.31725	serine/threonine-protein_phosphatase_6_regulatory_subunit_3-like
LOC121405705	0	3.50508	2.13872	0	0	0	2.03317	0	2.37708	0	1.50792	1.91689	0	1.78443	0	uncharacterized_LOC121405705
LOC121405709	6.09746	2.35109	0	3.1968	0	0	0	0	0	0	0	0	0	0	0	protein-glutamine_gamma-glutamyltransferase_K-like
LOC121405712	0	0	0	1.37286	0	0	0	0	0	0	0	0	1.89551	0	0	calcium-activated_chloride_channel_regulator_4A-like
LOC121405715	0.649049	3.00317	0	3.57301	11.6826	0.659564	5.2261	0	5.43117	12.199	0	6.56959	0	6.11563	9.10919	uncharacterized_LOC121405715
LOC121405717	0	0	4.43578	0	0	6.3863	0	0	0	0	0	11.927	0	0	0	ras-related_and_estrogen-regulated_growth_inhibitor-like
LOC121405722	8.16103	5.6642	4.60823	6.41806	3.45634	4.97594	2.1904	3.38027	1.70727	0	8.12266	4.13024	5.31686	1.92242	0	src_substrate_cortactin-like
LOC121405724	3.85973	2.23238	8.17293	0	0	3.92226	5.17971	7.99344	0	0	3.84158	7.32519	2.09549	2.27301	3.86929	catalase-like
LOC121405725	0	0	3.55648	0.990648	0	1.28009	0	0	0	0	0	0	2.73558	0	0	apoptotic_chromatin_condensation_inducer_in_the_nucleus-like
LOC121405728	7.80772	5.41898	15.4306	1.22804	57.8674	4.76052	12.5734	8.08483	1.63335	0	6.2168	1.97572	1.69556	0	1.56541	uncharacterized_LOC121405728
LOC121405729	6.52467	7.54745	0	0	0	0	4.37801	0	0	0	0	0	3.54232	0	0	cleavage_stimulation_factor_subunit_3-like
LOC121405730	1.56664	1.81222	4.42311	0	0	3.18404	4.20482	0	0	0	1.55927	5.94649	0	0	3.14104	putative_thiamine_transporter_SLC35F3
LOC121405735	0	3.66328	0	1.24525	0	0	2.12494	3.27925	0.828122	7.83178	1.57598	0	0	0	7.93674	uncharacterized_LOC121405735
LOC121405736	0	15.6739	12.7519	3.552	0	0	0	0	0	4.46794	0	0	0	0	0	ADP-ribosylation_factor_GTPase-activating_protein_2-like
LOC121405737	0	2.91955	0	1.98487	2.67231	0	0	0	3.95997	0	0	0	0	0	5.06033	BTB/POZ_domain-containing_protein_KCTD20-like
LOC121405738	1.69861	3.92975	4.7957	2.67166	3.59695	3.45225	0	0	0	6.72117	0	0	0	0	0	staphylococcal_nuclease_domain-containing_protein_1-like
LOC121405739	0	41.7726	9.55829	0	0	0	0	0	0	0	0	0	0	0	0	histamine_H3_receptor-like
LOC121405743	0	3.19738	0	0	1.4633	0	0	0	0.722801	0	0	0	0	0	0	ubiquitin_carboxyl-terminal_hydrolase_47-like
LOC121405746	0	2.99381	0	0	0	0	0	0	0.676781	0	0	0	0	0	0	uncharacterized_LOC121405746
LOC121405750	0	0	0	9.05841	0	0	0	0	0	0	0	0	0	0	0	ras-related_and_estrogen-regulated_growth_inhibitor-like
LOC121405751	0	2.9005	0	1.97192	0	0	0	0	0	0	0	0	0	0	0	receptor-type_tyrosine-protein_phosphatase_eta-like
LOC121405758	0	0	0	1.40674	0	0	0	0	0	0	0	0	0	0	0	CUB_and_sushi_domain-containing_protein_3-like
LOC121405767	0	0	0	6.29371	0	8.13256	0	0	0	0	0	0	0	0	0	uncharacterized_serine-rich_protein_C215.13-like
LOC121405771	0	37.4984	0	0	0	0	0	0	0	0	0	0	0	0	0	putative_RNA_polymerase_II_transcriptional_coactivator
LOC121405774	0	0	0	6.19688	0	0	0	0	0	0	0	0	0	0	0	protein_crumbs_homolog_1-like
LOC121405778	5.08907	0	0	4.00218	0	0	0	0	0	0	0	0	0	0	0	SIN3-HDAC_complex-associated_factor-like
LOC121405779	0	16.403	12.0105	0	0	0	3.80591	2.93668	0	2.80545	0	0	0	0	36.9596	muscarinic_acetylcholine_receptor_M4-like
LOC121405782	0	1.03555	0	0.704027	0	0	0	0	1.40458	1.77114	0	0	0.972052	1.0544	0	DENN_domain-containing_protein_5B-like
LOC121405783	0	15.2047	0	5.16849	0	3.33929	0	10.208	0	0	0	0	14.2723	0	0	exostosin-2-like
LOC121405784	0	0	0	4.7509	0	0	0	0	0.789866	0	0	3.82171	0	0	0	sialidase-3-like
LOC121405788	18.4746	15.2647	3.72569	16.6045	13.972	0	7.08363	8.1987	2.7606	0	18.3877	20.0354	11.4629	12.434	0	TBC1_domain_family_member_15-like
LOC121405789	4.1439	11.9837	2.92489	0	0	6.31655	0	8.58195	0	0	8.24883	7.86451	0	0	0	uncharacterized_LOC121405789
LOC121405792	0	2.17024	0	0	0	0	0	0	1.96242	0	0	0	0	11.0486	0	uncharacterized_LOC121405792
LOC121405795	10.212	7.87516	0	0	0	3.45913	0	0	0	0	6.77596	0	18.4806	0	0	transmembrane_protein_258
LOC121405798	0	0	0	3.41547	0	4.41337	0	4.49716	0	0	0	0	0	15.3457	4.35377	L-lactate_dehydrogenase-like
LOC121405802	0	5.72993	3.49628	0	5.24468	2.51685	6.64747	5.12925	0	0	19.7206	9.4009	2.68928	2.9171	0	transaldolase-like
LOC121405803	0	2.21956	8.12598	0	0	0	5.14996	0	0	0	1.90976	0	22.918	0	0	charged_multivesicular_body_protein_2a-like
LOC121405804	1.20307	13.9166	0	2.83838	1.2738	4.89023	4.84351	0	0	0	0	4.56649	0	0	6.03024	uncharacterized_LOC121405804
LOC121405812	2.70331	6.25413	0	0	5.72449	0	1.8139	2.79925	0.706905	0	0	0	1.46766	0	2.71	EF-hand_calcium-binding_domain-containing_protein_6-like
LOC121405814	2.95833	6.84415	0	2.32652	6.26453	0	7.9401	0	3.09438	0	0	7.48597	16.0611	0	8.89698	anti-apoptotic_protein_NR13-like
LOC121405815	0	0	0	3.86562	0	0	0	0	0	0	0	0	0	0	0	34_kDa_spicule_matrix_protein
LOC121405816	0	32.4348	0	0	0	0	0	0	0	0	0	0	30.4458	0	0	uncharacterized_LOC121405816
LOC121405821	544.328	854.531	779.381	232.383	296.399	316.083	323.499	539.49	219.61	538.459	379.238	265.642	1089.21	650.271	576.857	60S_ribosomal_protein_L10a-like
LOC121405822	0	0	2.31395	1.28909	0	3.33145	0	0	1.71455	0	0	0	0	0	0	neuron_navigator_2-like
LOC121405823	0	9.38054	6.86857	3.82645	1.71723	1.64814	2.17653	0	0	1.60438	0	6.15613	0	0	0	hsp90_co-chaperone_Cdc37-like
LOC121405827	0	8.86231	6.48911	0	0	0	4.11257	0	0.801366	0	3.05013	1.93868	0	1.80472	9.21637	G1/S-specific_cyclin-D1-like
LOC121405828	0	0	0	1.2055	0	0	0	0	0	0	0	0	0	0	0	uncharacterized_LOC121405828
LOC121405832	0	0	2.62221	0	0	0	0	0	0	0	3.69762	0	6.05089	0	1.86214	uncharacterized_LOC121405832
LOC121405833	2.75369	6.3707	0	0	0	0	0	0	8.64097	5.448	0	0	8.97006	6.48663	0	cyclic_AMP-responsive_element-binding_protein_3-like_protein_2
LOC121405834	2.70616	0	0	2.1282	0	0	0	0	0	0	0	3.42393	0	0	0	wee1-like_protein_kinase_1-A
LOC121405836	0	23.0386	0	0	0	0	0	2.57792	3.90607	0	0	0	2.70323	2.93222	0	uncharacterized_LOC121405836
LOC121405838	11.0544	12.7872	0	6.5201	0	0	18.5436	2.86168	5.78137	13.669	5.5012	0	0	9.76494	0	uncharacterized_LOC121405838
LOC121405841	0	0	0	1.31176	0	0	0	0	0.872351	3.30003	0	0	0	0	1.67213	vicilin-like_seed_storage_protein_At2g18540
LOC121405842	0	51.7696	21.0592	0	0	0	0	0	23.4061	0	0	0	64.7934	0	0	small_nuclear_ribonucleoprotein_E-like
LOC121405843	2.91567	6.74544	8.23186	0	0	17.7774	0	0	0	2.88424	0	0	6.33181	3.4341	0	proteasome_subunit_alpha_type-1-like
LOC121405844	6.52929	32.7288	0	18.8276	6.91317	4.42338	11.683	0	1.13826	0	10.831	8.26107	7.08965	0	0	deleted_in_malignant_brain_tumors_1_protein-like
LOC121405846	36.1422	19.9084	43.7317	8.12091	7.28897	43.7234	23.0964	73.0677	6.3007	8.5125	32.5463	17.4203	37.3752	16.2166	3.45064	gastrula_zinc_finger_protein_XlCGF57.1-like
LOC121405848	0	2.45027	0	4.99749	6.72828	0	2.84263	4.3868	1.10782	6.28615	0	0	0	0	2.12347	uncharacterized_LOC121405848
LOC121405849	0	0	11.4525	0	0	0	0	0	0	0	0	0	0	0	0	uncharacterized_LOC121405849
LOC121405851	0	0	3.1749	0	0	0	0	0	0	0	0	0	0	0	0	sialidase-4-like
LOC121405856	0	2.10895	0	0	0	0	2.44666	0	0	0	0	0	0	0	0	uncharacterized_LOC121405856
LOC121405859	0	35.2384	0	0	19.3525	0	0	0	6.3728	0	6.06397	7.70859	0	0	0	uncharacterized_LOC121405859
LOC121405861	6.37974	1.84495	0	0	1.68871	0	0	0	0	0	1.58743	0	0	0	0	uncharacterized_LOC121405861
LOC121405866	0	3.21764	0	0	0	0	0	0	1.45476	0	0	0	0	0	2.78849	uncharacterized_LOC121405866
LOC121405867	0	0	15.4935	0	0	0	0	0	0	0	0	0	11.9174	0	0	uncharacterized_LOC121405867
LOC121405869	0	0	6.8018	1.89463	0	0	0	2.49466	0	0	0	0	0	0	0	lactosylceramide_1,3-N-acetyl-beta-D-glucosaminyltransferase-like
LOC121405873	0	6.19312	0	0	0	0	0	5.54388	0	0	0	0	0	0	0	uncharacterized_LOC121405873
LOC121405874	0	0	4.80526	0	0	0	0	0	0	0	0	0	0	0	0	MANSC_domain-containing_protein_1-like
LOC121405875	0	3.86481	2.35822	1.31376	0	1.6976	3.36276	0.864913	0.436839	1.65252	0.83134	2.11362	0.906953	2.95135	0	F-actin-monooxygenase_MICAL3-like
LOC121405881	0	10.5946	0	0	0	0	0	0	0.798341	0	0	0	0	0	1.53026	uncharacterized_LOC121405881
LOC121405883	1041.25	805.198	2489.06	318.95	706.553	906.121	822.193	2296.39	39.1124	145.113	1004.86	691.464	1633.45	474.293	20.1845	uncharacterized_LOC121405883
LOC121405887	0	5.71152	0	3.88301	0	0	0	0	0	0	0	12.4943	0	0	0	uncharacterized_LOC121405887
LOC121405889	0	0	0	12.4679	0	0	0	0	0	0	0	0	0	0	0	uncharacterized_LOC121405889
LOC121405891	35.8451	27.6427	0	0	0	0	0	0	0	0	23.7843	15.1175	0	0	0	uncharacterized_LOC121405891
LOC121405897	292.988	728.041	214.458	341.354	953.62	198.49	567.936	89.8923	39.7265	332.767	226.808	562.912	141.392	268.398	0	uncharacterized_LOC121405897
LOC121405907	0	0	3.44629	0	0	0	0	5.05591	0	0	0	0	10.6033	0	0	mitochondrial_carrier_homolog_2-like
LOC121405909	0	10.6977	0	0	0	0	31.0268	0	0	0	0	0	0	0	0	T-complex_protein_11-like_protein_1
LOC121405911	0	0	7.40811	0	0	0	0	0	2.74457	0	0	0	0	0	0	uncharacterized_LOC121405911
LOC121405913	0	0	3.39877	1.89344	2.5492	0	0	4.98619	1.25918	14.2901	0	0	2.61428	0	0	isoleucine--tRNA_ligase,_mitochondrial-like
LOC121405914	0	0	13.6335	0	0	0	6.48034	5.0003	0	4.77685	2.4031	0	7.86501	0	0	deformed_epidermal_autoregulatory_factor_1_homolog
LOC121405916	0	8.39199	0	0	0	0	9.73581	0	3.79419	0	0	0	0	0	0	purine_nucleoside_phosphorylase-like
LOC121405918	17.4808	30.3315	12.3384	13.7473	9.25426	8.88198	0	0	0	8.64615	17.3986	0	9.49051	10.2945	0	NADH_dehydrogenase_[ubiquinone]_1_beta_subcomplex_subunit_8,_mitochondrial-like
LOC121405919	20.2645	20.511	0	43.8256	5.36399	12.8705	3.39935	0	0	0	17.6481	6.40984	0	5.96692	2.53934	protein-glutamine_gamma-glutamyltransferase_4-like
LOC121405921	0	4.7398	0	1.61119	0	0	2.74939	0	0	2.02666	0	10.3686	0	0	0	uncharacterized_LOC121405921
LOC121405924	0	2.65922	6.49041	0	0	0	0	0	1.20229	0	0	0	0	0	0	uncharacterized_LOC121405924
LOC121405926	344.479	2348.93	95.9776	581.026	340.737	322.424	462.287	23.4675	7.11159	26.9025	708.276	389.968	4.92162	21.3542	13.6315	uncharacterized_LOC121405926
LOC121405929	233.436	1246.9	19.3842	901.704	574.285	209.31	322.482	14.2189	10.7722	13.5835	410.009	243.23	7.45501	16.1731	0	uncharacterized_LOC121405929
LOC121405930	3.30727	0	0	2.60093	0	0	0	6.84931	0	6.54323	0	0	3.59111	0	0	uncharacterized_LOC121405930
LOC121405931	0	0	0	19.8967	0	0	0	0	2.2053	0	0	0	0	0	0	collectin-12-like
LOC121405933	10.1624	11.7555	43.0376	19.98	0	10.3271	13.6379	52.6155	15.9446	10.0529	15.172	32.1446	44.1384	0	5.09379	uncharacterized_LOC121405933
LOC121405934	0	0	6.597	7.35032	0	0	0	4.83909	2.44407	4.62285	0	0	0	0	0	toll-interacting_protein-like
LOC121405938	0	0	5.75968	0	0	0	0	0	0	0	4.0609	0	0	0	12.2706	coiled-coil_domain-containing_protein_34-like
LOC121405940	0	0	16.2034	0	0	0	5.13457	0	0	0	0	0	0	0	0	trans-1,2-dihydrobenzene-1,2-diol_dehydrogenase-like
LOC121405944	0	0	25.7918	0	0	0	0	9.45954	0	0	0	0	0	0	0	histidine_triad_nucleotide-binding_protein_1-like
LOC121405945	3.90386	0	0	3.0701	0	0	10.4779	4.04241	0	0	3.8855	4.93929	8.4778	0	0	octopamine_receptor_beta-2R-like
LOC121405947	0	0	12.3525	0	0	0	0	9.0609	0	0	0	0	0	0	0	uncharacterized_LOC121405947
LOC121405948	0	21.2195	0	0	0	8.47325	149.942	0	0	13.1972	1.65979	78.0681	0	13.7491	16.7176	uncharacterized_LOC121405948
LOC121405953	0	1.8023	0	0	0	0	0	0	1.62971	1.54126	0	1.97131	0	0	0	USP6_N-terminal-like_protein
LOC121405955	34.6018	19.3228	23.5808	0	0	59.4123	67.251	1.23551	0	2.3606	45.1271	10.5674	1.29557	0	0	mucin-5AC-like
LOC121405956	7.53215	5.80858	0	1.9745	0	0	0	0	0	0	0	0	0	0	0	metallophosphoesterase_MPPED2-like
LOC121405957	0	6.33889	0	0	5.80207	0	36.7697	0	0	0	0	0	0	0	5.49345	interferon_alpha-inducible_protein_27-like_protein_2A
LOC121405965	2.93685	13.5889	0	3.46443	0	5.96885	7.88243	0	0	2.90518	1.46152	0	0	0	0	excitatory_amino_acid_transporter-like
LOC121405967	0	19.383	0	13.1777	0	0	0	17.3511	4.38173	0	0	0	18.1944	19.7357	8.39893	V-type_proton_ATPase_subunit_E-like
LOC121405971	7.52478	0	10.6224	0	0	7.64668	0	31.1674	0	0	0	9.5206	8.17057	17.7254	7.5434	39S_ribosomal_protein_L23,_mitochondrial-like
LOC121405972	0	2.06966	0	0	0	0	2.40108	1.85269	4.67868	0	0	0	0	0	0	receptor-type_tyrosine-protein_phosphatase_epsilon-like
LOC121405979	0	0	0	4.45572	11.9978	0	0	5.86687	0	0	0	0	12.3041	0	0	aqualysin-1-like
LOC121405982	0	0	10.2947	0	3.8607	0	0	15.1029	0	0	0	0	0	0	0	sodium-_and_chloride-dependent_glycine_transporter_1-like
LOC121405983	0	0	0	9.19629	0	0	0	0	0	0	0	0	0	0	0	putative_nuclease_HARBI1
LOC121405984	0	0	0	5.59441	0	0	0	0	0	0	0	0	0	0	0	uncharacterized_LOC121405984
LOC121405985	0	0	0	1.80035	0	0	0	0	0	0	0	0	2.48574	0	0	CUB_and_sushi_domain-containing_protein_3-like
LOC121405987	0	0	0	2.47723	0	0	0	0	3.29483	0	0	0	0	0	0	C-Jun-amino-terminal_kinase-interacting_protein_1-like
LOC121405989	0	7.12109	0	0	0	6.25581	0	63.7458	0	0	24.5086	7.78888	26.7377	43.504	18.514	sulfotransferase_4A1-like
LOC121405991	0	3.76573	0	2.56015	0	0	0	0	0	0	0	0	0	0	0	protein-glutamine_gamma-glutamyltransferase_K-like
LOC121405992	0	0	0	3.33441	0	0	0	0	0	0	0	0	0	0	0	neuropeptides_capa_receptor-like
LOC121405996	0	0	4.87218	0	0	0	0	3.57389	0	0	0	0	7.4952	0	0	uncharacterized_LOC121405996
LOC121405998	31.8788	7.90201	0	0	0	25.4534	27.5021	0	0	9.01003	29.4626	11.524	2.47248	13.4097	4.56539	sodium/glucose_cotransporter_4-like
LOC121406002	2.72681	0	1.92466	1.07222	4.3307	1.38549	1.82968	0	0.713052	0	2.71399	0	0	0	0	uncharacterized_LOC121406002
LOC121406008	0	3.82736	0	0	0	0	0	0	0	0	0	0	0	0	6.63378	sporozoite_surface_protein_2-like
LOC121406009	0	0	0	14.7006	0	0	37.6285	0	19.5526	9.2457	9.30252	11.8255	10.1486	0	9.36961	late_histone_H2B.L3-like
LOC121406013	0	0	0	6.5531	0	0	0	0	8.71594	0	0	0	0	0	0	thialysine_N-epsilon-acetyltransferase-like
LOC121406014	21.2526	24.584	45.002	4.1784	5.62552	5.39921	14.2603	16.5051	5.55747	26.2793	52.8815	6.72236	46.153	18.7735	0	ATP_synthase_F(0)_complex_subunit_B1,_mitochondrial-like
LOC121406016	0	17.2901	21.1001	0	0	0	0	0	0	0	14.8768	0	16.2299	0	0	late_histone_H2A.L3-like
LOC121406017	0	7.31752	0	0	0	0	0	0	0	0	0	0	0	0	0	leucine-rich_repeat-containing_protein_15-like
LOC121406018	0	6.78925	0	0	0	2.98215	0	3.03876	0	0	14.604	7.42592	0	0	0	uncharacterized_LOC121406018
LOC121406020	0	20.0612	0	44.3259	0	0	0	0	9.07009	0	0	0	0	0	0	30_kDa_spicule_matrix_protein_alpha-like
LOC121406022	0	62.8065	0	64.049	0	0	0	0	0	13.4275	0	0	0	15.9873	27.2149	interferon_alpha-inducible_protein_27-like_protein_2A
LOC121406025	0	22.0196	0	5.98807	0	0	0	0	3.98221	0	7.57846	4.81691	4.13387	0	0	mitochondrial_uncoupling_protein_2-like
LOC121406028	0	0	48.7072	0	0	0	0	0	0	22.7544	0	0	0	0	5.76483	uncharacterized_LOC121406028
LOC121406031	9.26755	10.7203	0	3.64412	0	0	0	0	31.5046	9.16763	0	5.8628	0	0	0	34_kDa_spicule_matrix_protein-like
LOC121406033	214.653	734.558	555.531	161.775	85.2275	290.841	180.039	277.839	130.972	212.339	249.251	169.741	1476.14	252.82	206.219	60S_ribosomal_protein_L44-like
LOC121406034	0	97.9439	0	42.0554	0	4.52857	35.8824	0	118.863	8.81666	4.43542	84.5754	0	10.4975	169.762	27_kDa_primary_mesenchyme-specific_spicule_protein-like
LOC121406035	26.271	57.4016	8.24124	41.3204	61.8123	8.89885	39.1726	0	44.2718	14.4376	20.3369	18.466	0	10.314	40.9671	pollen-specific_leucine-rich_repeat_extensin-like_protein_1
LOC121406037	18.7843	7.24297	0	0	0	34.9959	0	0	0	0	3.116	0	0	7.37477	6.27695	monocarboxylate_transporter_14-like
LOC121406038	7.55066	17.4686	0	0	0	0	0	0	0	0	0	0	0	0	0	L-lactate_dehydrogenase_A_chain-like
LOC121406041	0	7.67833	2.67723	0	0	0	6.36276	0	0.495933	0	0	0	1.02964	0	0	neuron_navigator_2-like
LOC121406043	0	5.88162	0	0	0	0	0	0	0	0	0	0	0	0	0	oleosin_GRP-17-like
LOC121406044	0	9.83089	11.9972	0	8.99834	8.63635	0	0	0	0	0	10.7528	0	0	0	uncharacterized_LOC121406044
LOC121406047	377.842	194.254	414.854	0	0	170.65	169.02	173.89	0	0	501.421	318.706	45.5855	247.236	168.346	uncharacterized_LOC121406047
LOC121406050	0	0	66.2926	0	0	9.54432	0	9.72551	0	0	9.34801	0	40.7929	0	0	uncharacterized_LOC121406050
LOC121406051	0	3.4353	2.79486	2.33551	0	0	0	0	0.517723	0.97925	0	0	2.14976	2.33188	1.98475	acetyl-CoA_carboxylase-like
LOC121406053	0	0	0	2.14026	0	0	0	0	0	0	0	0	0	0	0	translation_initiation_factor_IF-2-like
LOC121406059	0	18.3871	0	0	0	0	0	0	2.77107	10.4827	0	0	0	0	0	lithostathine-like
LOC121406069	0	9.84723	0	0	0	0	0	0	0	0	12.7091	0	0	0	0	protein_inscuteable_homolog
LOC121406070	0	10.6178	0	3.60929	0	0	0	0	7.2008	0	0	0	0	0	0	uncharacterized_LOC121406070
LOC121406073	16.1743	18.7097	100.463	2.54398	0	9.8618	21.7057	103.84	3.38362	0	6.4393	28.65	119.425	38.1004	16.2144	uncharacterized_LOC121406073
LOC121406079	0	2.82265	0	0	0	0	3.27465	0	0	0	0	0	0	5.74803	0	methylmalonic_aciduria_type_A_homolog,_mitochondrial-like
LOC121406086	0	13.0982	0	8.90488	5.99447	0	45.5868	0	0	0	0	0	0	26.6731	0	macrophage_mannose_receptor_1-like
LOC121406090	0	4.71265	0	3.84471	2.58813	2.48401	0	0	4.68751	1.61204	0.810974	0	0.884734	0	4.90093	protein_phosphatase_1_regulatory_subunit_12B-like
LOC121406096	0	2.58046	0	0	0	4.53383	11.9747	0	4.66672	2.20673	0	0	0	2.62742	4.4726	adhesion_G_protein-coupled_receptor_L2-like
LOC121406097	20.7573	0	435.87	0	0	21.0936	0	69.8555	0	0	46.4843	0	59.1642	0	0	proline_hydroxylase_buaE-like
LOC121406098	2.99	0	2.11043	0	0	3.03843	0	3.09612	0	0	0	0	4.86991	0	0	protein_SpAN-like
LOC121406102	7.81169	4.51811	0	0	0	11.9074	0	0	0	0	0	0	0	0	0	transmembrane_prolyl_4-hydroxylase-like
LOC121406105	0	0	3.56876	0	0	0	0	0	1.32216	0	0	0	0	0	0	uncharacterized_LOC121406105
LOC121406107	0	3.64226	0	0	0	0	0	0	0	0	0	0	0	0	0	uncharacterized_LOC121406107
LOC121406108	0	2.15969	0	0	0	0	0	0	0	0	0	0	0	0	0	G-protein_coupled_receptor_22-like
LOC121406113	0	0	0	5.01408	0	0	0	0	0	0	0	0	0	0	0	2-oxoglutarate-Fe(II)_type_oxidoreductase_ppzD-like
LOC121406115	6.2008	14.3456	0	9.75296	0	0	0	0	0	0	0	7.84546	0	7.30334	31.0808	uncharacterized_LOC121406115
LOC121406122	34.6072	36.551	6.37219	4.73322	25.49	19.8775	26.2501	7.79032	0	1.48844	16.4734	3.80749	11.4366	0	0	protein_kinase_C-binding_protein_NELL2-like
LOC121406123	13.066	0	0	2.56886	0	0	0	1.69121	4.27089	0	0	4.13288	0	0	3.27458	serine_protease_23-like
LOC121406125	0	10.8645	0	0	0	0	4.20139	0	0	0	0	0	0	0	0	solute_carrier_family_28_member_3-like
LOC121406131	0	1.76885	0	0	1.21429	0	0	0	0.399866	0.378164	0	0	0	0.900517	0	tenascin-X-like
LOC121406132	0	4.32674	0	0	7.92064	0	0	0	0	0	0	0	0	0	0	putative_neutral_sphingomyelinase
LOC121406135	0	0	0	2.22827	0	0	5.70361	2.93397	0	2.80286	0	7.16985	0	3.33721	0	alpha-1,3-mannosyl-glycoprotein_4-beta-N-acetylglucosaminyltransferase_A-like
LOC121406140	0	0	0	3.69087	0	0	0	0	0	0	0	0	0	0	0	uncharacterized_LOC121406140
LOC121406141	0	27.0949	0	0	0	0	0	0	0	0	0	0	0	0	0	fructose-2,6-bisphosphatase_TIGAR-like
LOC121406143	0	0	0	2.40524	0	0	8.20877	3.16699	0	12.1019	3.04406	27.0875	6.64184	3.60225	3.06601	uncharacterized_LOC121406143
LOC121406149	0	0	0	33.9436	0	0	0	0	0	42.6964	0	0	0	0	0	uncharacterized_LOC121406149
LOC121406152	0	2.25819	0	0	0	0	0	0	0	0	0.971499	0	0	1.14964	0	nuclear_pore_complex_protein_Nup205-like
LOC121406154	4.52835	1.04764	0	0.712243	0	3.68137	2.4308	0	0	0	0.901411	3.43765	0	4.26681	3.63165	centrosomal_protein_of_290_kDa-like
LOC121406156	0	0	8.96691	0	0	0	0	0	3.32207	0	0	0	0	0	0	jasmonoyl--L-amino_acid_synthetase_JAR4-like
LOC121406158	0	0	11.1541	0	0	0	3.53453	0	2.75492	0	2.62142	0	2.85984	0	0	acid-sensing_ion_channel_4-A-like
LOC121406159	0	0	0	4.32805	0	5.59259	0	0	0	0	0	0	0	0	0	uncharacterized_LOC121406159
LOC121406163	71.4679	76.7658	7.20629	16.0584	32.4299	46.6879	41.1039	26.4301	0	5.04981	30.4851	32.2941	5.54296	6.01252	0	uncharacterized_LOC121406163
LOC121406170	0	0	0	0.989512	0	1.27862	0	0	1.3161	0	0	0	0	0	0	fibronectin-like
LOC121406171	0	0	0	0.961942	5.18038	0	0	0	0	1.20999	0	0	1.32816	0	0	phosphatidylinositol_phosphatase_PTPRQ-like
LOC121406172	0	0	2.90997	0	0	0	0	0	0	0	0	0	2.2383	0	4.13298	uncharacterized_LOC121406172
LOC121406173	11.9614	0	32.0822	0	0	13.3707	0	4.95437	0	0	19.0482	0	10.3904	0	0	uncharacterized_LOC121406173
LOC121406174	0	0	7.95706	4.43284	0	0	0	0	0	22.3036	0	0	18.3613	0	0	aqualysin-1-like
LOC121406177	0	2.7404	0	0	0	0	0	0	0	0	0	0	0	0	0	E3_ubiquitin-protein_ligase_TRIM35-like
LOC121406179	0	0	6.68648	0	0	0	0	0	0	0	0	0	0	0	0	GSK3B-interacting_protein-like
LOC121406182	24.7412	28.6195	0	31.7459	12.4086	33.0816	20.9699	1.34838	10.2154	2.57626	27.217	19.7706	0	21.4718	14.3593	protein_artichoke-like
LOC121406183	0	1.96923	2.40316	0	0	0	0	0	0	0	0	0	0	0	0	rab-like_protein_2A
LOC121406184	6.90899	7.99202	0	0	0	14.0418	0	0	0	0	13.753	0	0	0	0	transmembrane_protein_216-like
LOC121406185	0	0	0	10.1489	13.6638	0	0	0	0	8.5106	0	0	0	15.1996	12.937	hemicentin-2-like
LOC121406186	4.42685	2.56039	0	6.96279	2.34356	0	2.97039	0	3.47282	0	0	2.8005	2.40339	2.60698	2.2189	uncharacterized_LOC121406186
LOC121406188	0	4.42145	0	0	0	0	0	0	0	0	0	0	0	0	15.327	uncharacterized_LOC121406188
LOC121406194	0	0	0	3.66846	0	0	0	0	2.43962	0	0	0	0	0	0	uncharacterized_LOC121406194
LOC121406199	0	6.94668	5.65163	0	0	4.0684	0	2.07282	0	0	0	0	2.17357	0	0	cryptochrome-1-like
LOC121406200	2.16356	12.5135	0	0	0	15.3903	14.5174	0	0	0	6.46015	2.73741	0	10.193	10.8446	integrin_alpha-V-like
LOC121406208	0	0	0	5.54308	7.46284	0	37.8357	0	3.68628	0	0	0	0	0	0	uncharacterized_LOC121406208
LOC121406212	8.72054	0	6.15521	13.7161	9.23325	4.43091	29.2572	0	0	0	13.0193	0	4.73448	5.13555	0	synaptotagmin-12-like
LOC121406213	1.68132	4.8622	0	6.61118	1.78017	2.56284	4.51263	0	0	0	1.67342	10.6363	0	0	0	small_subunit_processome_component_20_homolog
LOC121406216	0	0	8.83542	0	0	6.36029	0	0	0	0	3.11473	0	13.5921	0	0	proline-rich_protein_5-like
LOC121406218	0	3.32105	0	0	0	0	0	0	0	0	0	0	0	0	0	alpha-2Db_adrenergic_receptor-like
LOC121406219	7.36959	68.1985	0	0	0	22.4669	14.8349	0	0	0	25.6723	37.297	0	30.3798	11.0818	tyrosine-protein_phosphatase_non-receptor_type_23-like
LOC121406220	0	0	0	3.12246	0	0	0	0	0	7.85526	0	0	0	0	0	uncharacterized_LOC121406220
LOC121406228	41.0845	63.3663	38.6648	0	14.5	69.5834	128.648	0	14.3246	0	0	103.963	59.4806	16.1298	54.9149	ATP-dependent_DNA_helicase_RecQ-like
LOC121406236	42.564	0	100.143	0	0	43.2535	0	0	0	0	21.1819	8.97556	0	8.35535	14.2231	probable_G-protein_coupled_receptor_21
LOC121406238	9.51312	17.607	5.37171	5.9851	2.01449	17.401	0	1.97015	0.995059	11.2927	1.89368	14.4436	0	2.24092	0	uncharacterized_protein_K02A2.6-like
LOC121406242	0	0	9.79717	0	0	0	0	0	0	0	0	0	3.76791	0	0	thyrotropin-releasing_hormone_receptor-like
LOC121406244	0	6.74801	0	0	0	0	0	0	0	0	0	0	0	0	0	histamine_H3_receptor-like
LOC121406246	265.906	230.692	496.023	99.2234	147.952	221.962	240.323	266.915	23.4144	21.4726	230.899	144.186	131.106	115.048	4.08007	uncharacterized_LOC121406246
LOC121406247	0	6.56603	4.00645	4.46395	0	5.7682	0	0	0	2.80752	5.64955	0	3.0817	0	0	RNA-binding_protein_28-like
LOC121406248	0	0	11.4283	0	0	0	0	2.79433	0	0	0	0	5.86031	0	0	uncharacterized_LOC121406248
LOC121406250	0	11.2543	0	17.853	3.43373	0	4.35214	0	1.69609	32.0809	0	0	0	30.5575	32.5108	excitatory_amino_acid_transporter_2-like
LOC121406260	0	8.76442	0	23.8342	0	0	0	7.84563	0	7.49503	0	0	0	0	0	multiple_epidermal_growth_factor-like_domains_protein_10
LOC121406261	17.4675	13.4704	36.9872	22.8949	9.24725	17.7505	27.3481	18.0875	33.4964	31.6785	8.69269	36.8341	31.611	6.85778	14.5923	uncharacterized_LOC121406261
LOC121406265	0	0	0	2.57269	0	0	0	0	0	1.61805	0	0	0	0	0	serine/threonine-protein_phosphatase_6_regulatory_ankyrin_repeat_subunit_B-like
LOC121406279	0	17.3492	0	2.94874	0	0	0	0	0	0	0	14.2321	0	0	0	spondin-1-like
LOC121406281	0	17.5288	0	0	0	0	0	0	0	0	0	0	0	0	0	uncharacterized_LOC121406281
LOC121406289	0	28.8543	0	0	0	0	33.4748	0	0	0	0	0	0	0	0	muscarinic_acetylcholine_receptor_M2-like
LOC121406294	0	0	0	7.53362	0	0	4.28521	0	0	0	0	0	0	0	0	uncharacterized_protein_K02A2.6-like
LOC121406296	52.4141	35.1017	0	19.5252	2.92082	86.903	18.5103	0	1.44275	8.18667	43.9306	3.49031	0	9.74741	8.29639	uncharacterized_LOC121406296
LOC121406299	1.60125	14.818	0	2.51853	0	6.50876	8.59543	1.65808	0	0	0	4.05191	0	3.77192	0	chaoptin-like
LOC121406300	0	1.2685	0	0.862398	0	2.22873	5.88651	0	1.14703	2.16956	0	0	0	1.29158	0	fibronectin-like
LOC121406306	181.841	590.138	1361.92	226.424	310.191	323.377	542.287	2583.83	105.669	639.576	336.836	511.27	2758.78	184.427	268.374	organic_cation_transporter-like_protein
LOC121406313	0	2.79909	0	0	0	0	0	0	0	0	0	3.06158	0	0	0	diacylglycerol_lipase-alpha-like
LOC121406314	0	8.25941	0	39.3064	0	0	0	0	3.73425	0	0	0	0	0	0	beta-parvin-like
LOC121406315	0	7.97051	0	0	0	3.50101	4.62342	0	0	0	0	0	0	0	0	transcriptional_enhancer_factor_TEF-1-like
LOC121406317	0	0	15.3836	0	0	0	0	0	0	0	0	0	0	0	0	uncharacterized_LOC121406317
LOC121406318	40.0011	14.9263	36.4309	11.1625	4.09867	23.6027	5.19494	30.7316	9.44788	7.65868	55.2245	1.63261	54.6429	12.1583	2.58711	trichohyalin-like
LOC121406320	386.054	564.672	1355.68	100.365	314.165	512.27	363.941	650.842	30.0353	167.275	546.191	395.603	478.08	82.6721	28.7859	uncharacterized_LOC121406320
LOC121406323	0	0	8.43677	0	12.6558	0	0	15.4716	0	0	0	3.78084	0	0	2.99565	UDP-glucuronosyltransferase_2B33-like
LOC121406325	0	0	0	3.20528	0	0	0	2.1102	0	0	0	0	0	0	0	uncharacterized_LOC121406325
LOC121406326	0	0	4.49833	0	0	0	0	0	0	0	0	4.03174	0	0	0	CUGBP_Elav-like_family_member_1
LOC121406330	0	0	0	2.9778	4.00912	0	5.08143	0	0	14.9827	0	4.7908	0	4.45975	7.59174	aqualysin-1-like
LOC121406333	8.04481	4.13595	0	0	0	5.45009	11.9956	0	0	0.884231	10.676	10.1786	0	37.9009	4.48041	mitochondrial_glutamate_carrier_2-like
LOC121406335	0	3.02901	0	0	0	7.98288	0	2.71148	8.21687	7.77092	0	0	0	0	0	uncharacterized_LOC121406335
LOC121406338	2.55327	0	7.20869	0	2.70339	2.59463	0	0	0	0	0	6.46097	2.7724	3.00726	2.55959	beta-1,3-galactosyl-O-glycosyl-glycoprotein_beta-1,6-N-acetylglucosaminyltransferase-like
LOC121406342	0	4.01587	0	0	0	1.76395	0	0	0	0	0	0	0	8.17789	0	inositol_1,4,5-triphosphate_receptor_associated_1-like
LOC121406347	9.16146	14.8366	0	0	3.88004	11.1718	19.6713	0	0	3.62507	12.7657	39.4107	0	15.1066	0	uncharacterized_LOC121406347
LOC121406361	16.5935	6.39822	0	0	0	0	0	5.72748	0	0	0	0	0	0	0
LOC121406364	3.74771	17.3407	12.3444	7.85946	9.25878	8.88631	10.0588	20.6972	5.88007	12.3577	3.73008	20.5475	24.4161	5.88542	8.76629	uncharacterized_LOC121406364
LOC121406366	0	1.73441	0	0	0	0	0	0	0	0	0	0	0	0	0	zinc_finger_protein_7-like
LOC121406367	3.57839	4.13932	0	0	0	0	14.4065	0	1.87147	3.5398	0	0	0	0	0	proline_hydroxylase_buaE-like
LOC121406370	0	0	53.426	0	0	0	0	15.6758	0	0	0	0	41.0943	0	0	uncharacterized_LOC121406370
LOC121406375	0	4.54584	0	0	0	0	0	0	0	0	0	0	0	0	0	aqualysin-1-like
LOC121406379	0	0	11.8789	0	0	0	0	0	0	0	0	0	45.6854	0	0	uncharacterized_LOC121406379
LOC121406381	0	0	0	4.38141	0	0	0	11.538	0	5.51121	0	0	0	0	0	gastric_triacylglycerol_lipase-like
LOC121406383	2.00945	0	1.8911	2.10705	1.4184	0	0.898886	0	0	1.98778	0	1.69495	1.4546	0	0	AT-rich_interactive_domain-containing_protein_2-like
LOC121406386	0	0	0	10.258	0	0	0	0	0	12.9032	0	0	0	0	0	muscarinic_acetylcholine_receptor_M3-like
LOC121406387	1.49036	3.44796	4.20775	0	0	0	0	0	0	0	0	0	0	0	0	alpha-mannosidase_2C1-like
LOC121406389	0	0	11.2974	0	0	8.13256	0	0	0	0	0	0	0	0	0	uncharacterized_LOC121406389
LOC121406416	2.27504	0	3.21157	0	0	0	0	9.42312	0	0	0	0	2.47029	0	0	uncharacterized_LOC121406416
LOC121406423	0	3.8953	0	0	0	0	0	0	0	0	0	0	0	0	0	prokineticin_receptor_2-like
LOC121406427	0	0	5.42545	0	0	15.6223	0	0	0	0	0	0	0	9.05337	0	leucine-rich_repeat-containing_protein_4-like
LOC121406436	0	4.18809	0	0	11.5002	0	0	0	0	0	0	0	0	4.2643	3.62951	alpha-(1,3)-fucosyltransferase_7-like
LOC121406440	1.946	0	2.74708	0	0	0	0	0	1.01774	3.85003	0	0	0	4.58401	1.95081	kinesin-II_85_kDa_subunit
LOC121406445	0	0	0	30.0595	60.7052	0	0	0	0	0	0	48.3608	0	45.0191	0	uncharacterized_LOC121406445
LOC121406449	0	0	17.7117	0	0	0	5.61253	4.33069	2.18729	0	4.16258	5.29152	9.08237	4.92588	0	lengsin-like
LOC121406452	0	8.91685	0	4.04145	2.72057	5.22225	3.44823	0	0	0	7.67224	9.75304	0	0	0	uncharacterized_LOC121406452
LOC121406453	3.00814	2.31979	29.7253	3.15425	12.74	0	6.72815	18.6894	0	1.98381	1.996	1.26867	3.26631	1.181	0	uncharacterized_LOC121406453
LOC121406454	0	0	0	10.1716	0	0	0	0	0	0	0	0	0	0	0	uncharacterized_LOC121406454
LOC121406462	0	0	0	27.8004	62.3811	0	0	0	6.16265	0	0	14.9088	0	0	0	uncharacterized_LOC121406462
LOC121406468	0	7.29649	0	0	0	0	0	0	0	0	0	0	0	0	0	alpha-N-acetylneuraminide_alpha-2,8-sialyltransferase-like
LOC121406469	0	0	0	2.68691	0	0	0	0	1.19124	0	0	0	0	0	0	circadian_locomoter_output_cycles_protein_kaput-like
LOC121406471	127.692	6.15452	413.089	66.9469	84.4996	183.827	64.2604	385.653	16.6955	57.8944	190.637	60.585	323.518	75.1981	0	uncharacterized_LOC121406471
LOC121406472	9.73738	0	0	15.3155	0	14.8427	0	10.083	5.09258	9.6324	0	12.3201	0	0	0	monocarboxylate_transporter_7-like
LOC121406473	0	0	0	5.11597	0	0	0	0	0	0	0	0	0	0	6.52144	retinol_dehydrogenase_8-like
LOC121406475	0	3.54775	0	0	0	0	0	12.7033	0	0	0	0	0	0	0	G-protein_coupled_receptor_GRL101-like
LOC121406478	0	10.5988	0	18.0142	0	0	12.296	0	0	0	18.2389	0	0	0	0	muscarinic_acetylcholine_receptor_M1-like
LOC121406480	0	0	0	2.86485	0	0	0	0	0	0	0	0	0	0	0	galanin_receptor_type_1-like
LOC121406482	0	0	32.1824	0	0	0	0	0	0	0	0	0	0	0	0	uncharacterized_LOC121406482
LOC121406498	0	9.87458	0	0	0	8.67473	22.9116	0	0	25.3332	42.4815	0	0	10.0543	0	uncharacterized_LOC121406498
LOC121406499	0	15.5008	6.30551	0	0	22.6955	5.99432	9.25055	0	13.2557	0	0	0	0	0	uncharacterized_LOC121406499
LOC121406505	5.45847	0	50.0857	0	5.77939	8.32034	0	28.261	0	5.39962	10.8656	0	14.8173	0	0	jasmonoyl--L-amino_acid_synthetase_JAR4-like
LOC121406524	0	2.0449	0	0	0	0	0	0	0	1.74873	0	13.42	0	0	0	protein_artichoke-like
LOC121406528	10.1223	11.709	14.2892	0	0	10.2862	13.5839	0	0	0	0	0	43.9639	0	0	39S_ribosomal_protein_L53,_mitochondrial-like
LOC121406533	0	0	0	3.87057	5.21108	5.00145	13.2098	0	0	0	4.89857	6.22712	0	0	0	CMP-N-acetylneuraminate-poly-alpha-2,8-sialyltransferase-like
LOC121406537	6.98754	0	0	27.4759	3.69918	0	4.6886	0	5.48165	0	0	8.84086	0	0	0	muscarinic_acetylcholine_receptor_M4-like
LOC121406545	0	14.5333	0	0	0	0	0	0	3.2854	0	0	0	0	0	0	dehydrogenase/reductase_SDR_family_member_11-like
LOC121406546	0	14.6895	8.9632	2.49668	3.36136	0	0	3.28739	0	6.28096	0	0	0	0	0	BTB/POZ_domain-containing_protein_KCTD17-like
LOC121406548	0	8.13839	0	0	0	0	9.44159	0	0	0	0	0	0	0	0	serine/arginine_repetitive_matrix_protein_1-like
LOC121406550	26.0728	26.8088	36.8059	18.2261	9.20192	8.83174	46.6526	56.9962	7.57551	51.5835	23.0669	69.6418	47.1841	3.41208	5.80831	muscarinic_acetylcholine_receptor_M4-like
LOC121406557	0	5.86222	0	3.98546	0	0	0	0	0	0	0	0	0	0	0	uncharacterized_LOC121406557
LOC121406560	0	3.52244	0	0	0	0	0	0	0	0	0	0	9.91933	0	0	uncharacterized_LOC121406560
LOC121406562	0	0	3.07586	0	0	0	0	0	0	0	0	0	0	0	0	uncharacterized_LOC121406562
LOC121406563	3.12818	3.61854	0	0	0	9.53655	0	0	0	3.09445	3.11347	7.91574	0	29.4751	12.5437	monocarboxylate_transporter_12-like
LOC121406565	0	39.5569	16.0912	0	0	0	0	0	5.9615	0	0	0	0	13.4256	0	actin-binding_Rho-activating_protein-like
LOC121406568	3.2506	0	0	2.55636	1.72086	6.60652	10.9057	3.36597	1.70004	19.2933	8.08829	0	0	0	0	flocculation_protein_FLO11-like
LOC121406571	0	0	0	4.20456	0	0	0	0	0	0	0	0	0	0	0	uncharacterized_LOC121406571
LOC121406575	0	0	0	2.49565	0	0	0	0	0	0	0	0	0	0	0	galanin_receptor_2a-like
LOC121406578	0	5.71152	0	3.88301	0	0	0	0	0	0	0	0	0	11.6309	0	ferroptosis_suppressor_protein_1-like
LOC121406581	7.30304	8.44783	0	11.4866	0	0	4.9003	0	0	0	0	0	0	0	0	tripartite_motif-containing_protein_72-like
LOC121406582	0	3.47833	8.48961	0	0	0	0	0	0	0	2.99282	0	3.26503	0	0	solute_carrier_organic_anion_transporter_family_member_2A1-like
LOC121406593	11.1507	0	0	43.8459	11.8062	0	14.964	0	11.6634	11.0304	0	0	0	13.1333	0	clumping_factor_A-like
LOC121406601	0	0	0	4.95243	0	0	4.2255	6.52088	0	0	0	0	0	0	0	tripartite_motif-containing_protein_54-like
LOC121406604	5.19459	6.00887	0	0	5.5	10.5575	6.97108	0	0	0	0	32.8618	0	30.5911	0	mucin-2-like
LOC121406611	7.8496	2.27002	5.54047	0	4.15555	11.9651	0	0	0	0	23.4381	7.44868	0	0	7.86903	acid-sensing_ion_channel_2-like
LOC121406621	0	0	18.3511	0	0	0	0	0	0	0	0	0	0	0	0	uncharacterized_LOC121406621
LOC121406628	0	1.05298	2.57002	0.715872	0	0	0	0	0	0	0	0	0	1.07214	0	GRB2-associated-binding_protein_1-like
LOC121406630	19.6995	11.3937	83.4267	0	10.4288	40.0372	0	71.3953	0	9.74354	19.6068	12.4622	0	0	0	uncharacterized_LOC121406630
LOC121406633	14.8988	2.87237	10.516	4.882	0	30.2802	13.3293	7.71377	0	0	21.0073	0	6.74059	4.38696	0	uncharacterized_LOC121406633
LOC121406650	2.2077	5.10754	0	0	0	0	2.96271	0	0	0	0	0	0	0	0	calpain-15-like
LOC121406656	61.958	143.341	87.4635	0	0	0	0	0	0	0	0	0	0	72.9745	0	U6atac_minor_spliceosomal_RNA
LOC121406666	101.35	62.9076	55.8325	27.216	28.79	100.479	49.7598	46.0742	21.9778	12.2264	81.1905	46.9137	77.8386	55.3179	12.3903	leucine-rich_repeat-containing_protein_59-like
LOC121406698	1.19428	0	0	1.87843	1.26449	0	1.60271	0	3.7476	1.1814	0	0	2.59355	0	3.59171	la-related_protein_1-like
LOC121406764	8.89213	0	2.51053	1.3986	0	1.80723	0	5.52463	0	1.75925	3.54013	2.25012	7.72422	6.28392	0	A-kinase_anchor_protein_17A-like
LOC121406787	0	0	0	2.78175	0	10.7835	0	0	0	0	7.04113	0	3.84077	4.16613	0	beta-2-syntrophin-like
LOC121406788	0	2.8873	0	0	0	0	0	0	0	0	0	0	0	0	0	uncharacterized_protein_K02A2.6-like
LOC121406796	0	7.62189	0	0	0	0	0	0	3.44601	9.77697	3.27902	0	0	0	6.60533	arginine--tRNA_ligase,_cytoplasmic-like
LOC121406804	0	14.6592	0	19.9322	30.1899	16.0974	0	0	3.31386	37.6081	0	8.01693	6.88013	0	0	protein_ABHD18-like
LOC121406812	0	0	0	5.0987	0	0	0	0	0	0	0	0	0	0	0	uncharacterized_protein_K02A2.6-like
LOC121406813	0	0	1.24261	0	0	0	0	0	0	0	0	0	0.955792	0	0	deoxycytidylate_deaminase-like
LOC121406820	0	0	3.49628	1.94776	0	0	0	0	0	0	0	0	0	0	0	uncharacterized_protein_K02A2.6-like
LOC121406821	26.9572	15.5914	19.0271	0	0	0	18.0881	0	0	0	40.2456	0	29.2707	15.8752	0	uncharacterized_LOC121406821
LOC121406822	0	0	5.68719	0	0	0	10.813	0	0	0	0	0	0	0	4.03871	uncharacterized_LOC121406822
LOC121406824	11.0181	1.82076	0	0	0	7.9976	2.11232	0	0	0	3.13324	0	0	0	0	uncharacterized_LOC121406824
LOC121406825	5.28027	0	14.9079	4.15255	0	16.0974	7.08606	0	0	0	0	0	0	0	0	zinc_finger_BED_domain-containing_protein_4-like
LOC121406827	0	2.21956	0	0	6.09478	1.94986	0	0	0	1.89809	0	0	0	9.0398	7.69412	monocarboxylate_transporter_14-like
LOC121406829	61.3115	109.111	306.256	25.963	14.9807	71.89	50.6334	97.6731	2.46657	37.3233	70.4113	107.409	30.7262	38.8839	0	uncharacterized_LOC121406829
LOC121406831	21.2232	16.3667	0	0	0	25.1615	0	0	1.84993	13.9962	24.644	53.7046	0	0	0	uncharacterized_LOC121406831
LOC121406836	0	28.2131	0	0	0	0	0	0	0	0	0	15.4294	13.2415	0	0	melanin-concentrating_hormone_receptor_1-like
LOC121406838	11.0623	6.39822	7.80812	113.096	87.8455	0	22.2683	22.9099	66.5336	49.2438	27.5258	41.9893	36.0352	84.6904	110.897	uncharacterized_LOC121406838
LOC121406839	0	0	4.50393	0	0	0	0	0	0	0	0	0	0	0	0	glutamate_receptor_ionotropic,_kainate_2-like
LOC121406840	0	1.63156	3.98218	0	0	0	0	0	1.47533	0	0	0	0	0	0	putative_methyltransferase_NSUN7
LOC121406844	1.52467	0	0	1.19904	0	0	0	0	0	1.50823	0	0	0	0	0	deleted_in_malignant_brain_tumors_1_protein-like
LOC121406845	44.538	0	125.745	122.59	70.7348	0	29.8847	115.297	0	0	22.1643	56.3509	96.7206	131.143	44.6482	uncharacterized_LOC121406845
LOC121406848	0	0	0	2.43972	0	0	0	0	0	0	0	0	0	0	0	calcium-activated_chloride_channel_regulator_1-like
LOC121406850	41.6788	56.2476	19.6121	92.8692	279.485	70.59	270.34	50.3511	7.26591	54.9726	27.6552	61.5223	37.7132	908.157	48.7457	uncharacterized_LOC121406850
LOC121406851	11.9298	6.89994	8.4204	0	0	0	8.00483	0	0	0	5.93686	7.54699	25.9073	0	0	neuronal_acetylcholine_receptor_subunit_alpha-6-like
LOC121406852	0	7.28453	0	0	0	0	16.902	13.0418	0	0	0	3.98382	3.41892	0	0	gamma-aminobutyric_acid_type_B_receptor_subunit_1-like
LOC121406855	0	3.62888	0	0	0	3.18794	10.5249	0	8.20345	80.6856	3.12236	1.98459	0	3.69491	39.311	uncharacterized_LOC121406855
LOC121406858	0	3.75459	0	1.27629	0	0	2.17791	3.36099	0	1.6054	0	6.16003	0	5.73437	0	ankyrin_repeat_and_LEM_domain-containing_protein_2-like
LOC121406859	0	0	0	1.57466	0	0	0	4.14671	0	0	0	0	0	0	0	unconventional_myosin-XVIIIa-like
LOC121406862	0	1.59869	0	0	0	0	0	0	0	0	0	0	0	0	0	uncharacterized_LOC121406862
LOC121406863	6.18583	7.15549	26.1968	0	19.6485	25.1441	16.6026	32.0269	6.47029	0	30.7837	0	73.8838	7.2857	0	uncharacterized_LOC121406863
LOC121406873	0	3.53505	0	0	0	3.10551	0	0	0	0	0	0	0	0	0	P2X_purinoceptor_4-like
LOC121406878	0	5.75032	0	0	21.0534	0	0	0	5.19968	34.4223	2.47385	0	0	0	0	sphingomyelin_phosphodiesterase_4-like
LOC121406879	0	13.8429	0	0	0	0	0	0	0	0	0	0	0	0	0	zonadhesin-like
LOC121406888	32.4169	17.6463	0	7.49809	0	32.942	30.708	0	3.98913	49.0442	11.3874	19.3011	0	4.49186	0	uncharacterized_protein_K02A2.6-like
LOC121406892	0	4.6873	5.72019	3.18669	4.29035	0	0	0	0	4.00842	4.03305	0	8.79974	4.7726	4.06214	crystallin_J1A-like
LOC121406897	0	5.51196	0	0	3.36345	0	0	0	0	1.57121	0	0	0	1.87075	0	protein_eyes_shut_homolog
LOC121406900	12.869	0	36.3332	30.3616	0	0	0	53.303	6.7304	38.1908	0	48.8469	13.9735	0	0	putative_nuclease_HARBI1
LOC121406902	0	4.56687	0	0	0	12.0359	0	0	0	0	0	0	0	0	0	toll-like_receptor_13
LOC121406905	0	6.07874	0	0	0	0	0	0	1.37416	2.59917	0	0	0	0	7.902	ARF_GTPase-activating_protein_GIT2-like
LOC121406914	8.29228	16.7863	0	0	6.58486	12.6399	11.1281	8.58658	2.1684	16.4057	4.12664	2.62292	2.25099	0	0	coagulation_factor_V-like
LOC121406915	1.41723	4.91816	0	2.22909	0	0	1.9019	0	0.741201	1.40195	1.41056	0	0	0	2.84147	sushi_domain-containing_protein_2-like
LOC121406919	0	0	33.1058	0	0	0	0	14.5705	0	0	0	0	5.09289	0	0	uncharacterized_LOC121406919
LOC121406926	4.33811	30.1088	6.12393	0	9.18633	8.81678	11.6434	0	2.2688	4.29134	4.31771	5.48872	0	20.4378	43.4885	peroxisomal_succinyl-coenzyme_A_thioesterase-like
LOC121406927	0	0	6.63332	0	0	0	0	0	0	0	0	0	0	0	0	glutamic_acid-rich_protein-like
LOC121406932	0	0	0	2.10631	0	0	0	0	1.40075	1.32473	0	0	2.90819	3.15456	0	sodium-_and_chloride-dependent_glycine_transporter_1-like
LOC121406936	317.78	0	725.67	22.051	19.792	180.46	0	241.955	0	18.4914	102.328	0	223.269	22.0166	0	protein_CASP-like
LOC121406937	2.30645	0	14.6516	0	0	0	0	20.3007	0	0	2.29561	0	17.5308	0	0	citron_rho-interacting_kinase-like
LOC121406940	1.95193	2.25791	0	0.767525	0	1.98355	0	0	0.510423	0	0	3.70447	0	0	0	telomerase-binding_protein_EST1A-like
LOC121406945	0	13.0437	0	0	0	0	0	0	0	0	0	0	0	0	0	G-protein_coupled_receptor_GRL101-like
LOC121406948	0	0	6.54393	0	3.27212	0	0	1.60005	0	0	0	0	3.35565	0	0	relaxin_receptor_2-like
LOC121406950	1.9579	0	5.52776	1.53974	2.07301	1.98962	2.62748	0	2.04793	0	1.94869	2.4772	0	0	0	phospholipid_phosphatase_1-like
LOC121406951	326.834	771.46	193.279	795.406	970.341	233.387	767.562	68.6014	41.578	214.083	239.577	737.631	35.9679	182.069	8.85521	N(4)-(Beta-N-acetylglucosaminyl)-L-asparaginase-like
LOC121406952	0	0	0	31.6333	0	0	0	0	0	0	0	38.1696	0	0	0	uncharacterized_LOC121406952
LOC121406956	0	0	42.2825	0	0	0	0	0	0	0	0	0	0	0	0	L-rhamnose-binding_lectin_SML-like
LOC121406957	14.8891	34.4462	21.0184	0	0	22.6955	39.9621	23.1264	0	0	22.2287	18.8382	16.167	0	0	toll-like_receptor_4
LOC121406962	32.4756	32.1997	19.6476	3.64853	24.5607	18.8581	18.6779	48.0403	2.42636	0	36.9404	23.4795	5.03753	5.46428	0	uncharacterized_LOC121406962
LOC121406963	0	0	16.558	0	18.6286	0	0	0	0	0	0	0	0	0	0	uncharacterized_WD_repeat-containing_protein_alr3466-like
LOC121406965	58.6473	0	110.386	0	0	99.329	26.2347	121.458	0	0	19.4572	123.671	0	23.025	0	paired_box_protein_Pax-6-like
LOC121406967	0	11.6629	0	3.96454	0	0	0	0	5.27303	4.98685	0	0	0	0	5.05368	pollen-specific_leucine-rich_repeat_extensin-like_protein_3
LOC121406969	1.92118	2.22234	0	1.51087	0	0	0	0	0	0	0	0	0	0	0	uncharacterized_LOC121406969
LOC121406972	26.8161	31.0196	0	0	0	27.2505	89.967	13.8839	42.0738	106.108	40.0349	16.9643	0	0	67.2061	V(D)J_recombination-activating_protein_1-like
LOC121406973	0	8.16081	0	0	0	0	9.46761	0	0	0	0	0	0	0	0	uncharacterized_LOC121406973
LOC121406976	0	0	0	2.7972	0	0	0	0	0	0	0	0	0	0	0	sodium-coupled_monocarboxylate_transporter_1-like
LOC121406978	6.23351	32.4479	4.39979	2.4511	0	0	12.5479	0	1.63004	3.08315	3.1021	0	10.1527	3.67093	0	solute_carrier_family_13_member_5-like
LOC121406981	138.494	16.8636	164.637	11.4648	0	81.4799	9.78199	113.218	7.62438	14.4212	50.7843	9.22251	79.1476	0	0	lysophospholipase_D_GDPD1-like
LOC121406989	176.45	258.262	188.086	75.0466	133.446	159.182	347.943	130.509	38.6079	199.483	188.165	246.032	80.1566	231.152	23.4646	protein_bowel-like
LOC121406990	0	2.57151	0	0	0	4.51809	2.98328	0	0	0	2.21258	0	0	5.2366	0	uncharacterized_LOC121406990
LOC121406994	3.25221	0	3.06067	0	6.88683	1.10163	0	0	0	0	1.07897	1.3716	2.35421	2.55364	0	C-Maf-inducing_protein-like
LOC121406995	14.3922	22.7021	0	4.11578	15.2383	0	12.2908	0	0	0	1.30223	1.6554	1.42067	3.08203	0	WD_repeat-containing_protein_97-like
LOC121406996	42.3684	122.525	109.651	0	22.4297	50.2305	47.3815	36.5601	0	6.98526	28.1128	44.6715	23.0023	24.9508	0	uncharacterized_LOC121406996
LOC121406997	0	0	0	2.31581	0	0	3.95179	0	0	0	0	0	0	0	0	dnaJ_homolog_subfamily_A_member_2-like
LOC121406998	0	6.39591	0	0	8.78139	0	3.71005	0	0	0	0	0	0	0	0	RING_finger_and_SPRY_domain-containing_protein_1-like
LOC121406999	0	10.7332	0	0	0	28.2872	0	19.2161	0	0	0	0	0	0	0	uncharacterized_LOC121406999
LOC121407000	0	7.76168	0	0	0	20.4557	0	0	0	0	0	4.24477	0	0	0	amine_oxidase_[flavin-containing]_B-like
LOC121407003	0	5.45111	4.43487	0	4.98947	3.1925	2.108	0	0	1.55387	0	1.98743	1.70561	3.7002	0	amine_oxidase_[flavin-containing]_B-like
LOC121407004	0	23.6674	0	0	0	5.19791	0	0	0	0	0	0	0	0	0	pyrimidodiazepine_synthase-like
LOC121407006	0	0	0	3.44173	0	0	29.3655	4.53174	5.72209	6.49384	0	8.30578	2.37601	61.8548	153.554	uncharacterized_LOC121407006
LOC121407007	19.6592	22.7408	22.2016	6.1842	0	7.99105	5.27647	24.4283	0	0	7.82668	0	12.8078	0	0	NADH_dehydrogenase_[ubiquinone]_flavoprotein_2,_mitochondrial-like
LOC121407008	0	0	99.6826	0	0	0	0	14.624	0	3.49263	0	0	11.5011	0	0	uncharacterized_LOC121407008
LOC121407011	0	0	0	5.9293	0	0	0	0	0	7.45826	0	0	0	0	0	kelch-like_protein_20
LOC121407014	0	0	3.91604	0	0	2.81901	0	0	0	0	0	0	0	0	0	uncharacterized_LOC121407014
LOC121407016	0	1.14895	0	2.34336	0	2.01868	1.33293	0	0	0	0	0	0	0	0	kinesin-like_protein_KIF15
LOC121407020	16.6583	84.7861	42.3284	34.0614	24.6927	37.2419	44.7104	58.6483	12.197	42.8445	69.6358	54.7992	25.3231	19.6202	6.67981	uncharacterized_LOC121407020
LOC121407021	0	2.49288	0	0	0	0	0	0	0	0	2.14493	0	2.34002	0	0	leucine-rich_repeat_and_coiled-coil_domain-containing_protein_1-like
LOC121407022	0	6.44929	7.87045	0	2.95156	0	11.223	0	0	0	11.0982	7.05408	9.08072	0	0	apoptosis-inducing_factor_1,_mitochondrial-like
LOC121407023	0	20.6198	0	0	0	0	0	0	9.32262	8.81666	0	11.2767	0	20.995	0	uncharacterized_LOC121407023
LOC121407025	0	9.19992	0	0	0	0	0	0	0	0	0	0	2.87859	0	0	uncharacterized_LOC121407025
LOC121407026	0	0	0	0.827326	0	0	2.82356	0	3.30115	2.08133	0	5.32413	0	0	0	b(0,+)-type_amino_acid_transporter_1-like
LOC121407028	13.0052	0	27.5382	2.5569	10.3273	13.2158	13.0896	20.2001	5.10121	51.4597	12.944	4.11364	10.591	7.65877	0	uncharacterized_LOC121407028
LOC121407030	0	0	3.4294	0.955251	0	0	0	5.03113	0.635265	0	1.20896	0	3.95675	0	0	serine/threonine-protein_kinase_PRP4_homolog
LOC121407032	0	0	25.5308	0	0	0	0	22.4731	0	0	0	0	15.7103	0	0	blastula_protease_10-like
LOC121407036	958.007	807.044	361.614	384.89	749.723	1066.65	751.816	118.61	78.4222	422.335	1502.8	909.076	131.159	262.463	37.58	protein_phosphatase_methylesterase_1-like
LOC121407043	32.9498	12.705	11.6285	4.31877	0	11.1612	11.0546	2.84327	1.43604	19.0135	21.8632	10.4223	11.9259	22.6383	2.75262	secretagogin-like
LOC121407044	0	0	4.75887	18.558	0	0	9.04802	6.98154	0	0	3.35527	0	7.32089	0	3.37947	IST1_homolog
LOC121407045	0	0	0	1.0428	1.40395	0	0	0	1.38697	0	0	0	0	0	0	NACHT_domain-_and_WD_repeat-containing_protein_1-like
LOC121407046	0	0	0	0.870725	0	0	0	0	0	1.09525	0	2.80171	3.60664	0	0	serine/threonine-protein_phosphatase_4_regulatory_subunit_1-like
LOC121407050	3.31584	0	0	5.21533	0	0	0	0	0	0	3.30025	0	0	0	0	engulfment_and_cell_motility_protein_1-like
LOC121407051	36.3809	71.7901	61.931	42.9164	66.8434	35.8829	73.2342	25.4841	1.11923	11.6434	54.3148	62.2764	31.3702	66.7951	2.14535	serine/threonine-protein_kinase_Nek11-like
LOC121407054	0	1.79465	0	0	0	0	0	0	0	0	0	1.96295	0	3.65462	0	erythroid_differentiation-related_factor_1-like
LOC121407057	28.1864	130.419	102.316	31.6665	8.52673	12.2756	0	58.3735	23.1649	19.916	44.0846	20.3785	192.377	28.4555	32.2927	ADP/ATP_translocase_3-like
LOC121407058	2.04058	0	2.8806	0	0	2.07364	0	0	0	2.01858	0	0	0	4.80682	0	RNA_cytosine-C(5)-methyltransferase_NSUN2-like
LOC121407059	0	1.43921	1.75635	1.95691	5.26931	0	0	2.57667	0	0	0	0	0	1.4654	0	zinc_finger_protein_423-like
LOC121407061	1785.14	1852.69	2943.94	918.43	627.089	1347.83	1175.43	2487.7	789.649	1741.14	1809.96	802.128	6901.98	1061.1	1538.69	60S_ribosomal_protein_L13-like
LOC121407063	0	0	0	2.68174	0	0	0	0	0	0	0	0	0	0	0	thyrotroph_embryonic_factor-like
LOC121407069	46.6685	33.74	107.055	18.3507	0	35.5684	0	54.3654	0	0	40.6429	0	120.35	6.8708	0	fibropellin-3-like
LOC121407070	0	0	7.0816	0	0	0	0	2.59728	0	0	0	0	0	0	0	deleted_in_malignant_brain_tumors_1_protein-like
LOC121407071	0	6.80137	0	0	0	0	0	0	3.07504	0	0	0	0	0	0	1,25-dihydroxyvitamin_D(3)_24-hydroxylase,_mitochondrial-like
LOC121407072	0	69.4646	0	29.5162	0	3.814	0	0	5.88869	3.71273	0	9.49734	0	0	33.8624	zinc_metalloproteinase_nas-13-like
LOC121407073	0	0	8.71122	0	0	0	0	0	0	0	0	0	0	0	0	uncharacterized_LOC121407073
LOC121407074	0	0	0	11.4388	0	0	0	3.01229	12.1713	0	0	14.7225	3.15871	6.85259	5.8325	zinc_metalloproteinase_nas-13-like
LOC121407075	0	0	0	3.51073	0	0	0	4.62259	0	0	0	0	0	0	0	mitochondrial_ribosome-associated_GTPase_2-like
LOC121407078	162.068	8.9273	27.2362	30.3464	69.4558	35.2915	36.2489	15.9829	102.923	568.757	72.9717	39.0579	8.37986	504.481	812.346	uncharacterized_LOC121407078
LOC121407079	0	0	2.67856	0	0	0	0	0	0	0	0	2.40072	0	0	0	uncharacterized_LOC121407079
LOC121407080	0	4.3887	0	0	0	0	0	0	0	0	0	0	0	0	0	copine-3-like
LOC121407081	0	9.48466	0	0	0	0	0	0	0	0	0	0	0	0	0	protein_broad-minded-like
LOC121407083	0	2.16971	0	1.47509	9.9298	1.90607	2.51714	0	4.90484	0	1.86686	0	0	0	16.9229	3-galactosyl-N-acetylglucosaminide_4-alpha-L-fucosyltransferase_FUT3-like
LOC121407084	0	7.13825	4.35561	0	0	0	0	0	0	0	0	0	0	0	0	protein_broad-minded-like
LOC121407085	0	0	0	2.97927	0	0	5.08394	0	0	0	0	0	0	0	7.59548	rhodopsin,_G0-coupled-like
LOC121407086	0	11.6744	0	0	0	0	0	0	0	0	0	15.9615	2.73962	0	0	probable_ATP-dependent_RNA_helicase_DDX27
LOC121407087	0	3.02592	0	0	0	0	0	0	2.73616	0	0	0	0	0	0	uncharacterized_LOC121407087
LOC121407089	10.0604	11.6374	4.73395	0	0	3.40779	0	0	0	3.31731	0	4.24292	0	0	0	cysteine_and_histidine-rich_protein_1-like
LOC121407090	11.4926	49.853	64.8944	36.1523	48.6731	35.0363	26.9901	26.7761	25.5448	85.2651	22.8771	39.9872	46.7959	57.5282	48.9644	translocon-associated_protein_subunit_alpha-like
LOC121407092	0	6.43528	0	0	8.83544	2.82667	0	0	0	0	0	0	0	0	0	copine-8-like
LOC121407094	2.45535	0	3.46611	0	7.79913	0	0	2.5425	0	0	0	0	2.66608	0	0	CMP-N-acetylneuraminate-beta-1,4-galactoside_alpha-2,3-sialyltransferase-like
LOC121407095	0	0	2.21517	0	0	1.59462	0	0	0.82068	0	0	3.9708	0	1.84821	0	zinc_finger_protein_37-like
LOC121407098	1.44767	0	0	1.13849	0	0	3.88552	0	0	0	0	0	0	0	2.90251	uncharacterized_LOC121407098
LOC121407099	0	2.21265	1.35011	0.752142	1.01263	0.971898	10.2679	1.9807	0	0	1.90381	6.05037	4.15394	0	0	RE1-silencing_transcription_factor-like
LOC121407106	586.561	1069.32	420.1	208.032	675.845	590.219	437.953	342.395	17.2933	143.637	532.291	560.24	199.812	235.365	17.2945	uncharacterized_LOC121407106
LOC121407107	0	0	0	1.60819	0	0	0	0	2.13897	0	4.07062	0	0	0	0	nibrin-like
LOC121407108	0	0	0	4.55653	0	0	0	0	0	0	0	0	0	0	0	aqualysin-1-like
LOC121407123	118.337	368.542	77.1005	71.5872	115.656	166.505	61.0795	18.8518	195.19	1116.58	72.4803	207.31	0	1018.53	1460.06	uncharacterized_LOC121407123
LOC121407124	0	4.2706	0	0	0	0	4.95446	0	0	0	0	0	0	0	0	uncharacterized_LOC121407124
LOC121407125	0	6.9959	0	0	0	0	0	0	0	0	0	0	2.18897	0	0	ras-related_protein_Rab-2A-like
LOC121407129	0	0	9.46376	0	0	0	0	0	0	0	0	0	3.63968	0	0	homeobox_protein_Hox-B7-A-like
LOC121407131	200.153	427.437	782.439	254.271	342.334	187.75	227.279	494.228	16.1044	91.3823	260.508	214.28	1019.78	308.277	401.297	60S_ribosomal_protein_L14-like
LOC121407132	0	0	4.99561	0	0	3.59616	0	0	0	0	0	8.95489	0	0	0	methyltransferase-like_protein_9
LOC121407133	5.07786	0	0	3.99336	18.8174	0	0	2.62904	3.98353	0	0	0	0	0	5.09043	serine/threonine-protein_kinase_24-like
LOC121407134	0	0	3.95676	0	2.96771	0	0	2.9024	0	0	8.36921	3.54634	3.04347	0	0	phosphoethanolamine_N-methyltransferase-like
LOC121407148	0	3.69989	0	0	0	0	0	0	0	0	0	0	0	0	6.41284	serine/threonine-protein_kinase_H1-like
LOC121407151	0	0	4.0035	0	1.50138	2.88197	0	0	0	0	0	0	0	0	2.84305	Y+L_amino_acid_transporter_2-like
LOC121407153	0	0	5.13274	0	0	0	0	0	0	1.79838	0	0	0	0	0	b(0,+)-type_amino_acid_transporter_1-like
LOC121407154	3.05844	0	25.9048	0	0	12.4319	0	38.0038	0	0	6.08811	0	23.2464	3.60225	12.264	39S_ribosomal_protein_L38,_mitochondrial-like
LOC121407159	0	6.29846	0	0	0	0	0	0	0	0	0	0	0	0	0	histone_H3,_embryonic-like
LOC121407160	0	0	4.2573	0	0	0	2.0236	0	0	0	0	0	0	0	0	SUMO-activating_enzyme_subunit_2-like
LOC121407161	0	2.08765	0	0	0	0	0	1.8688	0	0	0	0	0	0	0	splicing_factor_3B_subunit_3-like
LOC121407167	2.17766	2.51903	0	0	0	0	0	0	0	0	0	0	0	0	2.18305	lysosomal_protective_protein-like
LOC121407176	7.30304	16.8957	20.6188	5.74331	0	0	0	68.0601	3.81944	43.3458	21.8061	9.24005	47.5788	0	0	development-specific_protein_LVN1.2-like
LOC121407177	8.77533	5.07545	0	0	0	4.45874	0	0	0	0	0	0	0	5.16781	0	THAP_domain-containing_protein_5-like
LOC121407178	0	0	13.109	0	0	0	4.154	3.20527	0	0	0	0	0	0	0	uncharacterized_LOC121407178
LOC121407180	0	8.4599	0	0	0	0	0	0	0	0	0	0	0	0	0	uncharacterized_LOC121407180
LOC121407184	0	15.6739	0	0	0	0	0	4.67694	0	0	2.2477	0	0	0	0	nibrin-like
LOC121407186	0	0	0	1.00432	6.76072	0	0	0	0	0	0	0	0	0	2.56044	glycogen-binding_subunit_76A-like
LOC121407205	0	0	2.04709	0	0	0	0	1.5016	0	2.86899	0	0	0	0	0	retinoblastoma-like_protein_1
LOC121407207	0	4.32148	23.7319	2.93798	0	9.49095	7.52022	1.93423	2.93074	0	9.29573	7.0901	10.1412	2.20006	0	uncharacterized_protein_K02A2.6-like
LOC121407210	1052.63	1075.31	2006.99	182.764	188.165	972.434	605.404	1104.14	400.375	1419.92	1129.31	536.186	3473.42	692.349	863.371	60S_ribosomal_protein_L14-like
LOC121407218	0	3.90128	2.38048	1.32615	1.78545	0	4.526	0	0	0	1.67837	4.26713	1.83103	9.93069	5.07143	zinc_finger_protein_37-like
LOC121407222	0	1.93409	0	0	0	0	0	0	0	0	0	0	0	0	0	monocarboxylate_transporter_9-like
LOC121407234	0	0	10.1218	0	0	0	0	0	0	0	3.56821	0	0	0	3.59394	39S_ribosomal_protein_L38,_mitochondrial-like
LOC121407235	0	0	2.82655	0	0	0	0	0	0	0	0	0	0	0	0	b(0,+)-type_amino_acid_transporter_1-like
LOC121407238	1.90593	11.0235	5.38103	0	0	11.6208	2.55773	3.94714	1.99357	1.88538	5.6909	12.0572	4.139	6.73444	0	apoptosis-inducing_factor_1,_mitochondrial-like
LOC121407242	0	3.57631	0	0	3.27344	0	0	0	0	0	0	0	0	1.82069	0	SUMO-activating_enzyme_subunit_2-like
LOC121407243	0	0	37.7365	0	0	0	0	11.0723	0	0	0	0	29.0263	0	0	histone_H3,_embryonic-like
LOC121407252	0	1.05573	0	0	0.966322	0	0	0	0.477316	0	0	0	0	0	0	DNA_topoisomerase_I,_mitochondrial-like
LOC121407258	12.4016	21.5185	70.0273	19.5059	13.1307	18.9038	0	12.8418	0	12.2679	12.3433	15.6909	208.722	7.30334	0	development-specific_protein_LVN1.2-like
LOC121407259	0	3.97634	0	0	0	0	0	0	0	0	0	0	0	0	0	mitochondrial_import_inner_membrane_translocase_subunit_Tim21-like
LOC121407260	0	5.35853	0	0.910757	0	0	0	0	0	0	0	0	0	1.36401	0	thyrotroph_embryonic_factor-like
LOC121407261	0	0	2.52926	1.40904	0	0	0	0	0	0	0	0	0	0	0	protein_O-glucosyltransferase_2-like
LOC121407262	14.3002	0	5.04675	0	0	0	0	0	0	3.53651	0	0	3.88188	0	0	small_nuclear_ribonucleoprotein_Sm_D1-like
LOC121407263	0	0	18.3562	0	0	0	0	6.73241	0	0	0	0	2.35322	0	0	coiled-coil_domain-containing_protein_113-like
LOC121407267	1.82143	4.2139	15.4274	15.7567	0	16.6584	0	9.43038	4.76298	7.20717	0	11.5227	11.8665	2.14529	5.47782	uncharacterized_LOC121407267
LOC121407269	0	3.60679	0	0	0	0	0	0	3.2614	3.0844	0	0	0	0	0	uncharacterized_LOC121407269
LOC121407274	0	0	0	8.09553	7.26619	0	0	7.10627	0	6.78871	0	0	0	12.1244	0	glutathione_synthetase-like
LOC121407277	0	2.66161	0	0	0	0	0	0	0	0	0	2.91121	0	0	0	negative_elongation_factor_D-like
LOC121407278	17.6616	12.2581	44.8778	2.77791	11.22	3.58954	9.48066	3.65769	0	3.49424	3.51571	17.8768	7.67095	0	3.54107	small_nuclear_ribonucleoprotein-associated_protein_B'-like
LOC121407280	0.455682	0.527113	0	0	0	0	1.22304	0	0	0	0	0.576544	0	0	0	hydrocephalus-inducing_protein_homolog
LOC121407283	0	0	0	1.53739	0	0	0	0	0	0	0	0	0	0	0	deleted_in_malignant_brain_tumors_1_protein-like
LOC121407285	0	0.870689	0	0	0	0	0	0	0	0	0	0	0	0	0	1-phosphatidylinositol_4,5-bisphosphate_phosphodiesterase_gamma-1-like
LOC121407286	1.72337	3.98705	2.43281	2.71062	0	3.50258	11.5637	3.56908	1.80262	25.5719	1.71527	15.2633	11.2277	2.0298	6.91056	calcium-transporting_ATPase_type_2C_member_1-like
LOC121407289	0	0	4.03327	0	0	0	0	2.95852	0	0	0	0	0	0	0	amino_acid_transporter_AVT3B-like
LOC121407294	0	0	44.0361	0	0	0	0	50.76	0	0	0	0	43.5495	0	0	exosome_complex_exonuclease_RRP42-like
LOC121407295	0	0	36.8476	0	0	0	0	166.677	0	0	0	0	70.8564	0	0	mediator_of_RNA_polymerase_II_transcription_subunit_10-like
LOC121407297	0	0	0	6.30356	0	0	5.37831	0	0	0	1.99444	7.60605	0	11.8008	6.02646	kinesin-like_protein_KIFC3
LOC121407299	1.65685	5.7497	2.3389	0	0	0	0	0	0	1.63898	0	0	3.59808	0	0	FACT_complex_subunit_SPT16-like
LOC121407301	0	0	7.2764	0	0	0	0	5.33745	0	0	0	0	0	0	0	WW_domain-containing_oxidoreductase-like
LOC121407302	0	0	7.30827	0	0	0	0	0	0	0	0	0	0	0	0	39S_ribosomal_protein_L52,_mitochondrial-like
LOC121407305	10.8976	37.8175	7.69182	8.57016	5.76915	27.6853	0	28.2109	2.84968	10.7801	43.3854	13.788	23.6657	6.41762	5.46228	deubiquitinase_OTUD6B-like
LOC121407307	0	7.40594	0	0	0	0	0	0	0	0	0	0	20.8554	0	0	DNA-directed_RNA_polymerase_II_subunit_RPB3-like
LOC121407309	17.0162	42.6477	36.0315	11.1516	3.00277	34.5836	45.671	26.4301	0	14.0272	33.8723	28.7059	9.23827	6.68058	0	cyclic_nucleotide-binding_domain-containing_protein_1-like
LOC121407310	3.49059	0	0	2.7451	3.69582	0	0	3.61448	0	0	0	4.41641	11.3705	0	0	HAUS_augmin-like_complex_subunit_4
LOC121407315	0	0.456781	0.557436	0	0	0	1.58978	0	0	0	1.57209	0	0	0	0	mucin-17-like
LOC121407316	0	9.29291	3.78023	4.21189	0	1.36062	1.79683	0	0	0	2.66527	0	2.90769	1.577	0	calnexin-like
LOC121407323	0	0	0	5.79843	0	0	0	0	0	0	0	0	0	4.34205	0	protein_O-glucosyltransferase_2-like
LOC121407324	0	4.11631	0	0	0	7.23229	0	0	0	3.52013	0	0	0	0	0	small_nuclear_ribonucleoprotein_Sm_D1-like
LOC121407329	0	6.65702	0	0	3.04663	0	0	0	0.752444	5.69286	1.43196	0	0	0	0	dachshund_homolog_1-like
LOC121407338	0	0	1.59563	0	0	0	0	0	0	3.3544	0	0	0	0	1.13312	uncharacterized_LOC121407338
LOC121407339	33.558	22.8343	33.4393	1.55241	6.27017	24.0717	15.8945	10.2203	0	1.95271	33.4001	9.99027	30.0077	0	0	negative_elongation_factor_D-like
LOC121407350	3.79679	0	2.67988	0	0	7.71659	0	1.96577	0	0	5.6684	0	2.06132	0	0	N-terminal_EF-hand_calcium-binding_protein_1-like
LOC121407354	52.1804	74.5624	8.66598	33.7944	55.2483	37.4299	57.668	15.8919	22.4741	157.89	91.65	73.7875	0	93.9952	18.4622	exosome_complex_exonuclease_RRP42-like
LOC121407355	80.426	68.5508	5.97547	106.525	345.1	159.156	204.5	65.7477	35.4208	83.7461	109.539	171.381	36.7698	214.38	33.9474	mediator_of_RNA_polymerase_II_transcription_subunit_10-like
LOC121407360	5.8737	0	66.3332	0	0	0	0	6.08216	0	0	0	0	6.37779	0	0	ATP-dependent_RNA_helicase_DDX1-like
LOC121407361	0	4.12587	0	0	7.55292	3.62454	4.78655	3.69335	0	0	7.09997	13.5383	0	0	0	WW_domain-containing_oxidoreductase-like
LOC121407365	7.43197	6.44773	0	1.46117	0	3.77618	9.97361	0	0	0	0	0	0	0	0	cyclic_nucleotide-gated_channel_cone_photoreceptor_subunit_alpha-like
LOC121407366	5.49556	31.7851	31.0314	30.253	17.456	5.58459	0	79.6685	11.4966	10.8726	27.3486	34.7658	59.6721	25.8908	0	deubiquitinase_OTUD6B-like
LOC121407370	38.3617	52.4433	24.6152	2.74261	22.1548	42.527	79.5614	25.2784	5.4717	10.3495	62.4785	48.5365	15.1469	20.5375	0	cyclic_nucleotide-binding_domain-containing_protein_1-like
LOC121407377	0	0	35.0482	13.0168	0	0	0	0	0	2.72889	0	0	0	0	11.0619	uncharacterized_LOC121407377
LOC121407381	0	0	0	5.87168	0	0	0	0	0	0	0	0	0	0	0	deoxynucleoside_triphosphate_triphosphohydrolase_SAMHD1-like
LOC121407385	0	2.34985	0	0	0	0	2.72613	0	1.06241	0	2.02186	2.57021	11.0288	0	0	ER_membrane_protein_complex_subunit_4-like
LOC121407387	7.44313	15.4978	4.20286	4.68278	0	4.53822	0	0	1.55708	1.47257	2.96325	18.8346	6.46553	1.75331	2.98462	uncharacterized_LOC121407387
LOC121407388	0	2.28167	0	0	4.17689	0	0	2.04248	0	0	0	2.49564	2.14176	0	0	nuclear_receptor_coactivator_5-like
LOC121407389	0	0	0	1.01171	0	0	0	0	0	1.2726	0	0	0	0	0	5-oxoprolinase-like
LOC121407390	0	3.7107	4.52838	2.52274	0	3.25982	0	0	3.35536	4.75989	3.19276	14.2054	3.48315	3.77822	0	alanine--tRNA_ligase,_cytoplasmic-like
LOC121407392	35.2018	10.18	62.1161	0	9.31786	17.886	0	0	0	8.70557	17.5181	0	57.3344	0	0	subtilisin-chymotrypsin_inhibitor-2B-like
LOC121407395	2.9436	0	41.5535	2.31493	0	14.9564	0	6.09615	0	0	5.85952	0	6.39245	0	0	alanine--glyoxylate_aminotransferase_2,_mitochondrial-like
LOC121407399	0	10.9022	0	0	0	0	8.432	0	0	0	4.69025	0	0	0	0	sodium-dependent_noradrenaline_transporter-like
LOC121407400	7.16278	39.7708	34.3787	11.266	3.03356	8.73458	9.61236	19.2842	2.24765	4.25133	28.5164	1.81252	15.555	1.68727	1.4361	apoptotic_chromatin_condensation_inducer_in_the_nucleus-like
LOC121407402	2.98245	3.44997	0	0	0	0	0	0	0	0	0	0	0	0	0	tartrate-resistant_acid_phosphatase_type_5-like
LOC121407403	0	0	5.49416	0	0	0	5.22301	0	2.03549	0	0	0	8.45203	0	0
LOC121407404	20.8866	40.2679	54.0554	2.73764	0	10.6125	9.3432	10.814	7.28237	3.44357	38.1121	8.80881	60.4778	12.3002	6.97944	proteasome_subunit_alpha_type-7
LOC121407405	3.95613	4.57627	0	0	0	0	0	0	0	0	0	0	0	0	0	protein_MTSS_2-like
LOC121407406	1.93108	5.58447	0	0	0	0	0	3.99923	2.01988	0	0	1.22163	1.0484	0	2.90379	papilin-like
LOC121407408	1.79841	0	0	2.82863	7.61657	0	7.24032	1.86224	0	3.55803	0	2.2754	0	0	0	zinc_finger_protein_11-like
LOC121407409	0	5.268	0	1.79074	2.41093	1.15697	0	0	0	0	0	1.4405	0	0	0	NFX1-type_zinc_finger-containing_protein_1-like
LOC121407410	0	0	0	2.39096	2.14602	0	4.08002	0	2.65008	4.01	2.01733	2.56445	2.20081	2.38724	0	NFX1-type_zinc_finger-containing_protein_1-like
LOC121407412	0	2.96262	0	0	0	0	1.71851	0	0	0	0.637275	0	0	0	0	NFX1-type_zinc_finger-containing_protein_1-like
LOC121407414	0	2.16865	0	0	0	0	0	0	0	0	0	0	0	0	0	inositol_monophosphatase_1-like
LOC121407416	0.98865	0	1.39563	0	0	0	0	0	0.517057	0	0	1.25087	0	1.16444	0	thyrotropin-releasing_hormone_receptor-like
LOC121407420	0	0	0	3.3754	9.08882	0	0	0	6.73416	0	8.54376	0	0	0	0	(S)-2-hydroxy-acid_oxidase_GLO1-like
LOC121407422	2.34375	5.42228	9.92569	3.68637	2.48154	2.38171	3.14528	0	1.22576	2.31847	4.66545	0	2.54489	0	0	LIM_domain-containing_protein_1-like
LOC121407423	4074.94	5095.66	9663.16	3894.97	2813.82	4451.94	3501.59	6537.83	2409.14	7026.38	5450.46	2730.71	16535.7	3025.77	5021.52	40S_ribosomal_protein_S3-like
LOC121407424	6.56649	0	0	1.72136	0	0	0	2.26652	0	2.16523	0	0	0	0	0	guanine_nucleotide-binding_protein_G(o)_subunit_alpha-like
LOC121407427	11.7754	6.0539	25.8577	9.2605	0	9.30701	33.3607	16.2578	5.47418	29.7682	1.30223	3.31081	8.524	49.3125	0	ankyrin_repeat_and_SAM_domain-containing_protein_6-like
LOC121407428	89.558	110.997	144.486	20.1231	88.0503	97.5094	283.295	66.2404	20.0735	101.248	178.274	48.5622	90.2981	7.53442	57.7155	dehydrogenase/reductase_SDR_family_member_4-like
LOC121407429	0	6.00076	0	0	0	0	0	5.37169	0	5.13164	0	0	39.4295	0	0	EKC/KEOPS_complex_subunit_Tp53rk-like
LOC121407430	0	16.2768	6.62117	3.68862	0	4.76633	6.2944	0	0	0	0	0	10.1858	0	0	uncharacterized_LOC121407430
LOC121407431	0	0	0	7.56506	0	0	0	0	0	0	0	0	0	0	9.64334	probable_xyloglucan_galactosyltransferase_GT15
LOC121407433	0	3.73723	0	0	13.6829	0	4.33567	0	5.06903	0	0	0	0	0	0	proton_channel_OtopLc-like
LOC121407434	7.10055	254.622	0	11.1681	7.51802	3.60779	157.226	0	0	0	3.53358	58.395	3.85497	12.5446	0	kelch-like_protein_diablo
LOC121407435	0	14.288	0	0	3.26949	15.6898	8.28796	0	3.22994	0	3.07342	0	0	0	6.19117	TBC1_domain_family_member_20-like
LOC121407438	0	10.148	0	0	0	0	0	0	0	0	0	0	0	5.16634	0	F-box/LRR-repeat_protein_20-like
LOC121407439	0	3.12157	3.80944	0	0	0	0	0	0	0	0	0	1.46508	0	0	uncharacterized_LOC121407439
LOC121407440	0	1.34817	0	0	6.16998	0	0	1.20684	0	0	0	1.4746	5.06199	0	0	large_neutral_amino_acids_transporter_small_subunit_1-like
LOC121407444	0	4.06733	0	2.7652	0	0	0	0	0	0	0	0	0	0	0	centromere_protein_T-like
LOC121407445	18.5687	29.5342	9.82973	21.9044	7.37265	16.5108	18.6892	28.8416	1.21391	0	11.5509	20.557	15.1217	0	2.32683	NEDD8-activating_enzyme_E1_regulatory_subunit-like
LOC121407446	24.9543	36.0825	4.40336	12.2654	13.2107	25.3585	29.3023	25.8399	0	12.3426	43.4646	27.6263	3.38699	11.0217	3.12701	putative_ribosome-binding_factor_A,_mitochondrial
LOC121407449	0	1.85071	0	1.25822	0	0	0	0	5.02047	6.33066	0	0	0	0	1.60388	nucleolar_and_coiled-body_phosphoprotein_1-like
LOC121407454	0	4.6111	1.87573	2.08992	0	1.35027	0	0	0	0	1.3225	0	1.44278	0	0	zinc_finger_CCCH_domain-containing_protein_18-like
LOC121407455	0	1.34348	0	0	0	0	0	2.40528	0	0	0	0	2.52219	0	0	inverted_formin-2-like
LOC121407456	24.6877	17.1346	13.9402	3.88301	5.22783	5.01752	0	25.5639	5.16459	53.7272	39.3145	24.9885	80.4192	0	4.94975	cytochrome_b-c1_complex_subunit_Rieske,_mitochondrial-like
LOC121407459	0	2.15445	0	0	0	0	0	0	0	0	0	4.71298	0	0	0	zinc_finger_protein_SNAI2-like
LOC121407461	0	2.45162	0	0	0	0	2.8442	4.38922	0	0	4.21885	0	0	0	0	pyruvate_dehydrogenase_phosphatase_regulatory_subunit,_mitochondrial-like
LOC121407463	12.5947	2.08129	7.61977	0	0	3.65679	2.41457	0	0	0	0	2.27647	3.90733	0	0	uncharacterized_LOC121407463
LOC121407464	0	20.901	25.5068	0	0	0	9.69917	0	0	0	0	4.57221	0	4.25627	0	uncharacterized_LOC121407464
LOC121407465	0	0	2.51986	2.8076	0	0	0	0	0	0	0	0	0	0	0	uncharacterized_protein_C20orf85-like
LOC121407468	0	0.987019	0	0.671031	0.903431	1.73418	0	0.883548	0.446252	0	0	0	0	0	0	Golgi_apparatus_protein_1-like
LOC121407471	5.16548	3.98347	4.05105	0	2.43075	7.58213	15.4045	0	1.20067	0	9.71114	2.90469	1.2464	0	0	uncharacterized_LOC121407471
LOC121407472	6.23604	0	0	4.90419	0	44.3594	0	0	0	0	0	0	0	0	0	polyadenylate-binding_protein_2-like
LOC121407474	0	0	0	0.859698	0	0	0	0	0	0	0	0	0	0	0	uncharacterized_LOC121407474
LOC121407476	0	3.35553	4.09495	0	0	0	5.83928	0	1.5171	0	0	0	4.72465	0	0	uncharacterized_LOC121407476
LOC121407478	0	0	0	3.52506	0	0	0	2.32073	0	0	8.9226	0	0	0	0	cysteine-rich_venom_protein-like
LOC121407485	0	0	0	2.06987	0	0	3.53211	0	0	0	0	3.33009	0	0	0	uncharacterized_LOC121407485
LOC121407486	218.025	204.164	234.497	24.4944	109.926	242.658	195.058	182.761	0	0	217	78.8151	214.19	122.282	0	ankyrin_repeat_domain-containing_protein_SOWAHB-like
LOC121407488	0	0	0	6.99841	3.14073	0	7.96156	3.07161	0	0	0	0	0	0	0	alpha-ketoglutarate-dependent_dioxygenase_FTO-like
LOC121407491	0	1.82787	0	0	0	1.60577	0	0	0	0	0	0	1.71579	0	0	probable_Na(+)/H(+)_antiporter_nhx-9
LOC121407493	0	1.69408	2.06738	0	0	0	0	0	0	0	0	1.85294	0	0	0	uncharacterized_LOC121407493
LOC121407494	1.59146	1.84094	0	0.625786	0	0	0	0	0	0.787153	1.58398	1.00679	0	0	0	ras-responsive_element-binding_protein_1-like
LOC121407495	2.3502	2.71861	0	0	0	0	0	0	0	0	0	2.97355	0	0	0	zinc_finger_protein_341-like
LOC121407496	0	13.4858	16.4575	0	0	0	31.2905	0	0	11.5326	0	29.5008	0	13.7312	0	programmed_cell_death_protein_5-like
LOC121407499	10.522	6.08568	0	0	1.85677	23.1669	0	0	0	0	15.7087	0	1.90417	2.06547	0	purine_nucleoside_phosphorylase-like
LOC121407502	2.21024	2.55671	3.1201	1.73819	0	0	5.93223	0	3.46782	4.37282	0	0	0	5.20647	2.21571	integrator_complex_subunit_8-like
LOC121407504	4.32956	2.50412	0	0	0	10.9992	2.90511	0	1.13216	4.28287	15.0822	5.4779	2.35057	2.54969	13.0208	uncharacterized_LOC121407504
LOC121407505	0	0	0	1.73073	0	0	0	0	4.60389	0	0	2.78445	0	0	0	transcription_factor_25-like
LOC121407508	0	0	3.44191	0	2.58156	0	6.5441	0	0	0	0	0	0	0	0	protein_VAC14_homolog
LOC121407512	0	0	0	4.85298	9.8006	0	0	0	0	0	0	0	3.35026	0	0	solute_carrier_family_52,_riboflavin_transporter,_member_3-A-like
LOC121407513	0	7.59259	0	0	0	0	0	6.79664	0	0	0	0	0	0	0	solute_carrier_family_52,_riboflavin_transporter,_member_3-A-like
LOC121407515	8.01126	1.85341	2.26183	2.52011	0	3.25642	0	1.65912	0.837966	0	1.59472	0	3.47952	0	1.60622	GDP-mannose_4,6_dehydratase-like
LOC121407520	0	18.6313	53.0526	0	22.7379	0	7.20491	22.2375	0	0	0	6.79282	11.6592	0	0	26S_proteasome_non-ATPase_regulatory_subunit_7-like
LOC121407524	251.358	44.246	455.109	38.6754	46.2845	166.584	153.993	384.76	0	0	201.228	62.2224	278.863	45.0511	0	gamma-glutamylcyclotransferase-like
LOC121407533	0	2.96435	0	0	0	0	0	0	0	0	2.55059	0	0	0	0	protein_LSM14_homolog_A-like
LOC121407536	0	2.84115	0	0	0	0	0	0	0	0	0	0	0	0	0	exocyst_complex_component_2-like
LOC121407539	354.755	563.672	634.968	300.045	489.005	329.213	1239.6	494.878	63.0117	230.422	425.037	682.588	367.758	745.792	100.651	scavenger_receptor_cysteine-rich_domain_superfamily_protein-like
LOC121407540	6.80496	1.96792	4.80313	0	0	0	0	0	0	0	1.69324	2.15246	1.84724	0	0	lysosomal_protective_protein-like
LOC121407545	0	3.41287	0	0	6.24769	0	0	0	0	0	0	3.73292	0	0	0	uncharacterized_LOC121407545
LOC121407551	0	10.2121	0	1.7357	4.67366	0	8.88557	0	0	6.54981	0	2.79245	0	0	0	uncharacterized_LOC121407551
LOC121407552	0	0	4.08031	0	0	0	3.87894	0	0	0	0	0	0	0	0	UDP-glucuronosyltransferase_2C1-like
LOC121407553	3.18304	3.682	1.49779	0	0	0	7.11934	2.19734	0	2.09915	3.16807	6.71214	1.15207	3.749	0	uncharacterized_LOC121407553
LOC121407560	0	2.87889	0	9.78613	0	5.05815	0	0	0	4.92385	0	0	0	0	7.48476	hepatocyte_nuclear_factor_4-gamma-like
LOC121407561	5.20985	0	2.45151	1.36572	0	0	0	7.19301	0.908239	0	0	0	7.54263	2.0454	0	ankyrin_repeat_domain-containing_protein_12-like
LOC121407562	0	2.89341	3.531	0	0	1.27092	0	1.29505	0.654086	3.71152	0	0	5.43197	1.47303	2.50751	formin-2-like
LOC121407567	0.947324	3.28747	0	0	3.00906	0	0	0	0	0	0	0	0	2.23153	0	protein_virilizer_homolog
LOC121407568	2.8256	3.26853	0	0	4.48759	8.61411	0	0	0	1.39757	0	0	4.60214	0	0	uncharacterized_LOC121407568
LOC121407574	71.3082	58.0458	67.1085	35.3088	95.0749	75.1472	63.7965	90.2477	9.66873	54.8639	68.3442	103.588	77.428	62.2127	0	uncharacterized_LOC121407574
LOC121407577	5.52719	3.19681	0	0	0	2.80837	0	0	0	0	0	0	0	0	0	uncharacterized_LOC121407577
LOC121407580	0	0	16.1391	0	0	0	0	0	0	0	0	0	3.10348	0	0	dysbindin-like
LOC121407584	28.2456	32.6732	0	0	0	86.1094	0	0	0	0	0	35.7372	61.3394	0	198.209	uncharacterized_LOC121407584
LOC121407591	0	1.15208	0	0	0	1.01209	0	0	0	2.95565	0	0	0	0	0	serine/arginine_repetitive_matrix_protein_2-like
LOC121407593	0	0	4.6151	0	0	0	0	0	0	0	0	0	0	0	0	alpha-(1,3)-fucosyltransferase_7-like
LOC121407596	0	15.4424	0	0	7.06733	0	0	0	0	0	0	0	0	0	0	type_1_phosphatidylinositol_4,5-bisphosphate_4-phosphatase-like
LOC121407597	0	0.745752	0	0	0	0	0	1.33515	0.674339	0	0	1.63137	0	0	0.646288	kinase_D-interacting_substrate_of_220_kDa_B-like
LOC121407604	0	14.6612	0	0	2.23659	0	0	0	0	6.26887	2.10247	0	0	0	2.11763	cystine/glutamate_transporter-like
LOC121407613	0	27.366	16.6982	0	0	0	0	0	0	0	0	0	0	0	5.92903	dehydrogenase/reductase_SDR_family_member_1-like
LOC121407618	5.06447	5.85835	0	0	0	5.14651	0	0	0	0	0	6.40773	0	0	0	prefoldin_subunit_4-like
LOC121407621	0	13.0501	0	0	5.97246	0	15.1398	0	0	0	0	0	0	0	0	uncharacterized_LOC121407621
LOC121407622	2510.86	1663.23	2090.33	1215.14	2113.15	1897.29	2620.75	2599.97	230.084	498.88	1666.03	1479.8	1712.7	1857.79	150.594	uncharacterized_LOC121407622
LOC121407629	0	0	78.9336	0	0	0	0	0	0	0	0	0	36.4286	0	0	uncharacterized_LOC121407629
LOC121407630	0	5.39595	26.3399	0	4.93898	18.9612	43.82	28.9817	2.43962	18.4577	18.5711	29.5098	10.1301	21.9765	0	proteasome_assembly_chaperone_4-like
LOC121407633	0	0	0	6.09837	0	0	0	0	0	0	0	0	0	0	0	alpha-1A_adrenergic_receptor-like
LOC121407636	10.6594	27.7434	82.7612	4.19144	5.64308	13.5402	14.3049	30.3539	8.36223	21.089	0	3.37167	52.0842	12.5548	26.7146	cytochrome_P450_2J6-like
LOC121407637	881.877	505.736	100.226	38.203	43.5211	975.907	190.559	30.9551	216.928	558.168	996.745	392.414	73.0344	695.388	460.76	lengsin-like
LOC121407641	702.532	1233.77	668.604	613.771	2132.24	710.201	1124.16	508.091	52.2155	280.633	936.747	1136.89	308.038	612.338	145.248	N-acetylgalactosamine-6-sulfatase-like
LOC121407650	0	4.99557	0	0	0	0	2.89776	0	0	0	0	0	0	0	0	zinc_finger_protein_64-like
LOC121407653	19.7501	68.5382	83.6412	46.5961	31.367	15.0526	26.5044	86.9171	2.58229	14.6529	29.4859	124.943	85.7805	34.8927	0	charged_multivesicular_body_protein_1a-like
LOC121407654	0	3.58496	0	0	0	0	0	0	0	0	0	0	0	0	0	multiple_epidermal_growth_factor-like_domains_protein_10
LOC121407656	0	12.8799	0	0	0	0	0	0	0	0	0	0	0	0	0	syntaxin-16-like
LOC121407663	0	23.5733	0	0	0	10.3545	0	10.551	5.32898	10.0795	0	0	44.2555	0	0	uncharacterized_LOC121407663
LOC121407666	0	0	18.5604	0	0	0	0	18.1528	0	0	8.7241	0	19.0351	0	0	caveolin-1-like
LOC121407667	0	0	0	3.57512	0	2.30984	3.05036	0	0	0	0	0	0	0	0	adenosylhomocysteinase_A-like
LOC121407668	0	0	7.12113	0	0	0	13.5394	0	2.63825	0	0	0	0	35.6488	0	putative_nuclease_HARBI1
LOC121407673	0	5.5131	0	0	0	0	0	0	0	0	0	0	0	0	0	peptidase_M20_domain-containing_protein_2-like
LOC121407674	7.56181	4.37358	0	2.97341	2.0016	0	0	0	0.988693	3.74014	1.88156	4.78372	0	0	0	E3_ubiquitin-protein_ligase_MYLIP-A-like
LOC121407675	0	11.3068	13.7983	0	0	19.8658	0	0	0	0	0	12.3671	0	0	19.5975	uncharacterized_LOC121407675
LOC121407678	0	0.831038	0	0	0	0	0	0	0	0	0	0.90897	0	0	0	uncharacterized_LOC121407678
LOC121407679	2.4035	1.39013	0	0	0	0	0	0	0	0	0	0	0	0	1.20473	anillin-like
LOC121407687	0	0	0	0.903944	0	0	0	0	0	0	0	2.9086	0	0	0	guanine_nucleotide-binding_protein_G(s)_subunit_alpha-like
LOC121407688	0	5.52854	0	1.8793	0	0	0	0	0	0	0	0	0	0	2.39559	CCR4-NOT_transcription_complex_subunit_10-like
LOC121407692	0	0	8.27899	0	37.2572	0	7.8704	0	0	0	0	0	6.36806	0	0	peroxisomal_coenzyme_A_diphosphatase_NUDT7-like
LOC121407694	13.1162	0	0	15.4724	17.3591	26.6573	30.8031	0	17.1492	32.4369	3.26362	58.0825	0	27.0345	13.1486	SHC_SH2_domain-binding_protein_1-like
LOC121407697	26.2212	12.1326	0	0	5.55256	5.32918	7.03769	0	8.22809	10.3754	10.4391	6.63517	0	0	0	uncharacterized_LOC121407697
LOC121407703	638.591	2061.05	639.933	933.109	2141.1	745.074	2311.73	314.3	101.018	335.35	929.841	1645.86	316.736	1332.49	55.3235	uncharacterized_LOC121407703
LOC121407704	13.0715	7.56029	27.6788	0	0	6.64165	0	3.38387	0	6.4653	0	0	21.2901	0	0	adenosylhomocysteinase_A-like
LOC121407706	0	65.507	0	0	0	0	12.6661	0	4.93618	0	0	0	0	0	0	membrane-associated_progesterone_receptor_component_1-like
LOC121407707	0	0	2.46825	0	0	0	0	1.81053	0	0	0	0	0	0	0	uncharacterized_LOC121407707
LOC121407709	0	0	0	7.63838	0	0	6.51721	0	2.53985	0	0	6.14445	0	0	0	hydroxyacid_oxidase_1-like
LOC121407710	8.35995	0	11.8014	0	0	0	5.60948	4.32833	0	0	8.32064	0	0	0	0	probable_tubulin_polyglutamylase_TTLL9
LOC121407712	0	32.2582	9.84163	0	0	0	0	0	0	0	0	0	0	0	0	pre-mRNA-splicing_factor_SPF27-like
LOC121407717	0	2.93838	0	0	0	0	3.4089	0	7.30675	2.5128	0	0	0	0	0	uncharacterized_LOC121407717
LOC121407718	4.26112	0	6.01524	0	0	0	2.85919	0	0	0	0	2.69565	0	0	0	probable_G-protein_coupled_receptor_CG31760
LOC121407723	0	5.31845	19.4712	0	0	0	0	23.8045	0	4.54815	0	0	14.9769	0	0	26S_proteasome_non-ATPase_regulatory_subunit_7-like
LOC121407724	7.27882	0	5.1376	0	0	0	4.88405	0	0	0	0	0	11.8553	4.28652	0	cytochrome_b5-like
LOC121407726	5.17418	5.98527	17.0431	1.35637	4.56532	7.01067	5.78641	8.03673	0.45101	0	7.72478	5.45545	4.68187	1.0157	0	uncharacterized_LOC121407726
LOC121407728	5.54181	25.6421	18.254	14.5274	5.86763	24.4035	14.8741	7.65133	0	1.82735	22.063	65.4424	0	124.016	1.85184	translin-associated_factor_X-interacting_protein_1-like
LOC121407729	239.89	40.1637	31.1908	2.48232	113.629	105.85	21.1796	6.53695	0	9.36725	84.8234	55.911	3.42734	11.1531	0	gamma-glutamylcyclotransferase-like
LOC121407732	0	0	0	1.78124	2.39814	6.905	0	0	0	0	6.76297	0	4.91872	0	0	ubiquitin-conjugating_enzyme_E2_C-like
LOC121407733	0	0	3.81748	1.06335	0	1.37403	0	1.40012	0	0	0	1.71076	0	3.18509	0	mRNA_cap_guanine-N7_methyltransferase-like
LOC121407736	0	5.58587	0	0	0	0	0	0	0	0	0	0	0	0	0	uncharacterized_LOC121407736
LOC121407738	5.6994	3.29641	0	2.24108	9.05174	20.2711	3.82427	2.95084	1.49037	19.7328	2.8363	3.60554	0	3.3564	2.85676	exosome_complex_component_RRP41-like
LOC121407743	0	0	0	4.92819	0	0	0	0	0	0	0	0	0	0	0	soluble_scavenger_receptor_cysteine-rich_domain-containing_protein_SSC5D-like
LOC121407744	414.515	1023.05	187.154	1282.83	2782.57	424.641	713.923	227.647	14.043	235.735	232.173	944.874	158.534	1174.1	156.459	uncharacterized_LOC121407744
LOC121407746	0	5.76337	0	0	0	0	0	0	0	0	0	0	0	0	4.99469	lysosomal_protective_protein-like
LOC121407752	0	2.9923	0	0	1.36944	0	0	0	0	0	3.86195	0	0	0	0	putative_sodium-coupled_neutral_amino_acid_transporter_7
LOC121407754	0	5.11931	0	0	9.37154	0	2.96953	4.58264	0	6.56679	0	8.39907	0	0	0	uncharacterized_LOC121407754
LOC121407755	0	0	0	3.83616	0	0	2.18206	0	0	0	0	0	0	1.9151	0	protein_FAN-like
LOC121407757	0	13.3721	3.26376	1.81822	0	0	9.30805	11.9703	0	0	4.60227	2.92523	7.53128	0	0	transcription_and_mRNA_export_factor_ENY2-like
LOC121407765	0	14.8946	6.05892	6.75079	4.54441	8.72319	11.5198	8.88879	0	0	4.27188	16.2914	13.9813	0	0	uncharacterized_LOC121407765
LOC121407769	1.01853	0	0	4.00501	4.31367	0	0	0	0	0	0	0	0	0	0	protein_virilizer_homolog
LOC121407771	0	5.52338	6.7405	0	0	0	6.40784	9.88871	0	4.72341	14.2573	0	0	0	0	E3_ubiquitin-protein_ligase_NRDP1-like
LOC121407776	0	0	0	4.67282	0	0	0	0	0	0	0	0	0	0	0	centromere_protein_N-like
LOC121407777	2.94285	0	0	0.771445	3.11587	0.996841	0	1.01576	0	0	0.976337	1.24113	0	0	0	palmitoyltransferase_ZDHHC3-like
LOC121407786	0	0	6.35353	0	0	0	0	0	0	0	0	0	0	0	0	methyltransferase-like_protein_17,_mitochondrial
LOC121407789	0	4.50437	0	3.06232	0	0	0	0	0	0	3.87566	0	8.45631	0	7.80721	39S_ribosomal_protein_L30,_mitochondrial-like
LOC121407791	0	4.13643	0	0	0	0	0	0	0	0	0	0	0	0	0	putative_mediator_of_RNA_polymerase_II_transcription_subunit_26
LOC121407794	0	0	5.75662	0	0	0	0	4.22265	0	0	0	15.4785	4.4279	0	0	alpha-(1,3)-fucosyltransferase_7-like
LOC121407797	8.5317	14.8036	0	6.70956	0	8.66991	5.72472	0	24.5411	37.9787	0	0	0	0	0	carbohydrate_sulfotransferase_11-like
LOC121407811	413.243	553.806	583.358	108.989	157.407	371.286	223.18	427.91	11.8604	92.2265	401.268	439.958	350.212	38.5815	17.6821	uncharacterized_LOC121407811
LOC121407822	241.21	338.387	28.9792	8.07209	16.3016	271.194	268.603	0	18.7885	35.5376	357.56	207.787	5.57258	54.4019	10.2897	uncharacterized_LOC121407822
LOC121407831	11.2596	0	2.64911	0	0	1.907	0	0	0	0	1.86777	2.37433	6.11296	0	0	uncharacterized_LOC121407831
LOC121407836	324.733	154.674	80.8961	24.0356	36.405	427.05	82.0306	35.6038	103.898	256.985	422.069	149.844	78.817	341.975	298.728	lengsin-like
LOC121407840	5.70929	8.80567	0	0	0	1.93392	0	5.91192	0	1.88258	3.78829	2.40786	4.13285	0	0	ribonucleoside-diphosphate_reductase_large_subunit-like
LOC121407843	0	5.71152	0	0	0	0	0	0	0	0	2.45716	0	0	0	2.47488	anamorsin_homolog
LOC121407844	2.34303	2.71032	0	1.84262	0	0	0	4.85238	0	2.31777	0	0	2.54412	2.75963	0	N-acetylgalactosamine-6-sulfatase-like
LOC121407845	0	60.0481	0	0	0	0	0	0	0	0	0	0	0	0	0	uncharacterized_LOC121407845
LOC121407846	0	0	0	1.46507	0	0	0	0	0	0	0	0	0	0	0	aurora_kinase_C-like
LOC121407848	0	0	15.3329	0	0	0	0	0	0	0	0	0	0	0	0	plasmolipin-like
LOC121407849	0	0	6.01524	0	0	0	0	0	0	0	0	0	0	0	0	CKLF-like_MARVEL_transmembrane_domain-containing_protein_4
LOC121407853	0	0	0	2.10962	0	0	0	0	0	0	0	0	0	0	0	zinc_finger_protein_64-like
LOC121407854	0	0	0	0.852301	0	0	0	0	0	0	0	0	0	0	0	short_transient_receptor_potential_channel_4-associated_protein-like
LOC121407857	753.387	692.459	1170.7	321.503	853.334	569.743	901.312	879.909	163.41	358.189	819.597	454.437	735.606	701.62	175.64	testis-specific_serine/threonine-protein_kinase_4-like
LOC121407858	0	16.0417	0	0	0	0	0	0	0	0	0	0	0	0	0	uncharacterized_LOC121407858
LOC121407861	7.65473	2.95155	3.60195	0	5.40319	2.59291	6.84837	0	0	0	2.53958	0	0	0	0	protein_FAM114A2-like
LOC121407865	0	0	4.22003	0	0	0	0	0	0	0	0	0	0	0	0	neurotrypsin-like
LOC121407872	0	0	5.96561	0	0	4.29442	0	0	0	0	0	0	0	0	0	enoyl-CoA_delta_isomerase_2-like
LOC121407873	9.6639	0	27.2842	0	0	19.6409	0	40.0275	0	0	19.2369	0	31.4798	0	0	caveolin-3-like
LOC121407877	273.342	207.575	217.97	231.373	689.289	195.075	347.221	267.919	60.0198	220.857	317.746	184.801	246.957	164.658	52.2937	nucleoporin_p58/p45-like
LOC121407878	0	2.65843	0	0	4.86658	0	0	0	0	0	0	0	0	0	0	insulin-like_growth_factor-binding_protein_complex_acid_labile_subunit
LOC121407880	4.83651	0	0	1.90178	0	0	6.49054	5.00816	1.26473	0	0	0	7.87739	0	0	E3_ubiquitin-protein_ligase_MYLIP-A-like
LOC121407881	0	5.09802	0	0	0	0	0	0	0	0	0	0	0	0	0	rotatin-like
LOC121407883	0	0	3.87615	0	0	0	0	2.27462	0.287209	0	0	0	2.38518	0	0	uncharacterized_LOC121407883
LOC121407884	0	1.57769	0	0	2.88816	0	0	0	0	0	0	0	0	0	0	anillin-like
LOC121407886	0	1.36767	0	1.85964	0	0	0	0	0	0	0	0	0	0	0	genetic_suppressor_element_1-like
LOC121407892	0	6.12905	0	2.08343	2.805	0	0	0	4.1566	0	0	3.35191	0	0	0	peptidyl-prolyl_cis-trans_isomerase_6-like
LOC121407895	0	3.07088	22.4854	35.4918	16.8649	0	10.6879	16.4937	5.55363	36.7655	5.2845	26.8708	0	37.5211	0	SHC_SH2_domain-binding_protein_1-like
LOC121407896	0	0	10.3851	0	0	0	0	0	0	0	0	0	0	0	0	nudix_hydrolase_11-like
LOC121407897	0	0	8.08157	0	24.2459	0	7.68273	0	20.9585	5.66316	0	14.4866	0	13.4856	0	peroxisomal_coenzyme_A_diphosphatase_NUDT7-like
LOC121407898	0	0	0	1.53661	0	0	0	0	0	0	0	0	0	0	0	nuclear_factor_of_activated_T-cells_5-like
LOC121407905	629.737	1780.16	1827.95	845.008	1841.93	519.95	2112.75	725.448	82.3371	358.195	673.784	1648.31	388.902	1094.02	142.042	uncharacterized_LOC121407905
LOC121407906	3.3608	0	42.6987	0	0	3.41525	4.51016	10.4403	0	13.2983	3.345	0	25.5447	0	0	adenosylhomocysteinase_A-like
LOC121407907	0	101.567	0	0	0	0	58.9156	0	0	0	43.6953	27.7729	0	25.8538	0	uncharacterized_LOC121407907
LOC121407911	15.9527	11.072	0	12.5456	13.5125	25.9377	17.1266	3.30377	0	22.0929	34.9308	4.03676	0	22.5469	0	hydroxyacid_oxidase_1-like
LOC121407913	0	4.554	0	0	0	0	0	0	0	0	0	0	0	0	0	paired_box_protein_Pax-2a-like
LOC121407915	11.3946	13.1808	12.0639	8.96101	12.0645	8.68438	3.82285	5.8995	0	11.2717	8.50575	3.6042	6.18625	3.35515	8.56709	vesicle-associated_membrane_protein_7-like
LOC121407916	0	0	3.3619	1.87289	0	0	0	7.39814	0	7.06754	0	6.02637	20.6873	0	0	gamma-tubulin_complex_component_2-like
LOC121407921	2.23337	0	0	7.02553	2.36468	0	0	0	0	0	0	5.65147	0	0	0	probable_G-protein_coupled_receptor_CG31760
LOC121407924	0	0	0	1.31204	0	0	0	0	0	0	0	0	1.81154	0	0	uncharacterized_LOC121407924
LOC121407926	8.12565	18.7988	0	19.1707	12.9051	20.6432	0	0	12.749	4.01902	0	20.5617	4.4115	9.57043	0	probable_tRNA_N6-adenosine_threonylcarbamoyltransferase
LOC121407927	0	17.1831	0	4.67282	0	3.01905	3.98694	0	1.55377	5.87777	8.87085	0	0	3.49917	2.97827	protein_phosphatase_1_regulatory_inhibitor_subunit_16B-like
LOC121407930	0	0	1.65302	0	0	0	0	3.63762	0	0	0	0	2.54295	0	0	uncharacterized_LOC121407930
LOC121407933	7.7604	17.9538	0	0	0	0	5.20718	0	0	7.67673	3.86195	0	0	0	0	hydroxyacid_oxidase_1-like
LOC121407934	6.21083	0	8.76756	0	0	8.41526	0	8.57502	1.08274	0	4.12108	0	22.4795	0	0	soluble_scavenger_receptor_cysteine-rich_domain-containing_protein_SSC5D-like
LOC121407935	0	3.16305	18.0136	0	0	0.926238	0	5.66293	0	0	0	0	3.95879	0	0	uncharacterized_LOC121407935
LOC121407937	0	0	7.0955	0	0	0	0	0	0	0	0	0	0	0	0	caseinolytic_peptidase_B_protein_homolog
LOC121407938	1.69411	0.979837	0	0	2.69057	1.72156	3.41022	0	0.443004	0	0	3.21517	0	0	4.24576	uncharacterized_LOC121407938
LOC121407941	3.1985	3.69989	0	0	0	0	0	0	0	0	0	0	0	0	0	nudC_domain-containing_protein_1-like
LOC121407942	0	0	5.58469	3.1112	4.18872	0	5.30907	8.19307	0	0	19.6876	5.00542	0	4.65955	3.96592	protein_IMPACT-like
LOC121407943	1.72337	47.8445	0	6.77654	21.8964	10.5077	16.1892	0	0	18.7527	6.86108	2.18047	5.61383	8.11919	0	DNA_replication_licensing_factor_mcm4-A-like
LOC121407947	6.61099	8.60322	10.499	9.09836	0	1.67952	4.43593	13.6912	5.61844	1.63493	0	1.04556	17.9459	0.973308	0	terminal_nucleotidyltransferase_4A-like
LOC121407948	0	20.8129	0	0	0	0	6.03643	0	4.70498	0	0	5.69118	0	0	0	malonyl-CoA-acyl_carrier_protein_transacylase,_mitochondrial-like
LOC121407949	5.94644	13.7572	0	0	0	0	0	0	0	11.7646	0	7.52363	0	0	0	beta-1-syntrophin-like
LOC121407950	0	0	0	1.69385	0	0	0	0	2.2529	2.13063	0	5.45025	0	0	0	SNF-related_serine/threonine-protein_kinase-like
LOC121407951	0	4.85105	0	0	0	0	0	0	0	0	0	0	0	0	0	ciliogenesis_and_planar_polarity_effector_2-like
LOC121407953	0	3.15594	0	0	0	0	0	0	0	0	0	0	0	0	2.73502	caseinolytic_peptidase_B_protein_homolog
LOC121407954	0	2.47552	0	0	0	0	0	0	0	0	0	0	0	0	0	protein_spire_homolog_1-like
LOC121407955	0	0	0	2.51329	0	3.24761	0	3.30926	8.35701	0	0	0	0	7.52815	0	5'-3'_exonuclease_PLD3-like
LOC121407956	24.9118	5.76337	0	0	0	0	0	0	2.60574	4.92864	0	0	0	0	0	lathosterol_oxidase-like
LOC121407957	0	9.41765	0	0	2.87337	0	0	0	1.4193	2.68455	0	13.7344	0	3.19634	2.72053	septin-7-like
LOC121407963	0	3.28301	0	0	0	0	3.80873	0	0	0	0	0	0	0	0	glycine_receptor_subunit_alpha-4-like
LOC121407964	0	25.7491	0	5.00162	0	0	4.26748	19.757	1.6631	22.0198	0	0	24.1701	11.2361	6.37568	cathepsin_Z-like
LOC121407969	2.99174	20.7643	0	9.41115	0	0	0	0	3.12932	2.95949	2.97768	49.2083	0	0	0	snake_venom_5'-nucleotidase-like
LOC121407974	0	0	0	3.98196	0	3.43025	0	1.74769	0	3.33918	0	0	0	0	0	AFG3-like_protein_2
LOC121407978	1.10719	7.6845	0	0.870725	2.34457	2.25025	0	0	0	2.19051	4.40794	0	0	6.52028	3.3298	uncharacterized_LOC121407978
LOC121407979	2.27841	7.90669	0	0	2.41236	0	0	0	0	0	0	0	0	0	0	uncharacterized_protein_KIAA0513-like
LOC121407985	0	3.58786	13.1354	2.43922	0	0	4.16238	0	0	0	0	0	0	3.65314	0	vacuolar_protein_sorting-associated_protein_4B-like
LOC121407986	2.31899	5.365	3.27361	0	0	0	0	9.60516	0	0	4.61616	0	0	2.73131	0	coactosin-like_protein
LOC121407990	0	4.77289	2.91232	0	0	2.09647	0	6.40881	0	0	0	0	4.48021	0	2.06816	NEDD8
LOC121407991	0	2.35171	0	0	0	0	2.72829	0	0	0	0	2.57225	1.10375	0	0	pericentriolar_material_1_protein-like
LOC121407993	0	11.2353	9.14073	2.54613	0	0	0	0	1.69324	0	6.44473	0	3.51545	0	6.49121	uncharacterized_LOC121407993
LOC121407994	82.3553	86.1049	122.965	48.5748	60.3673	57.9388	91.3914	44.2791	5.79805	48.5671	44.1366	62.1184	48.151	80.2103	20.6398	RNA-binding_protein_39-like
LOC121407995	0	0	0	17.3122	7.76934	0	0	0	7.67536	0	7.30341	0	63.7414	25.9279	0	uncharacterized_LOC121407995
LOC121407996	53.8065	13.3374	37.9781	30.2249	12.2078	46.867	0	115.412	14.0702	11.4056	57.3787	0	150.234	81.4803	7.70567	eukaryotic_translation_initiation_factor_2_subunit_2-like
LOC121407998	0	0	0	3.97236	0	0	0	0	0	0	0	0	0	0	0	alpha-crystallin_B_chain-like
LOC121408000	0	0	0	6.7735	0	0	0	0	0	0	0	0	0	0	0	uncharacterized_LOC121408000
LOC121408002	6.68069	0	4.71542	0	3.53674	3.39446	0	3.4589	0	0	0	0	18.1351	0	0	AKT-interacting_protein-like
LOC121408003	19.3619	2.98626	12.7551	2.03023	2.73337	7.87022	0	12.0294	4.72553	10.215	10.2778	1.63315	12.6141	9.12182	6.46994	F-actin-uncapping_protein_LRRC16A-like
LOC121408004	0	5.32482	0	0	0	0	0	0	0	0	0	0	0	0	0	glucose-induced_degradation_protein_8_homolog
LOC121408005	0	5.18805	0	0	4.74868	0	6.01881	0	0	0	0	0	19.4796	5.28245	0	enoyl-CoA_delta_isomerase_2,_peroxisomal-like
LOC121408006	0	0	0	3.23272	0	0	0	4.25654	2.14984	0	0	0	0	0	0	enoyl-CoA_delta_isomerase_2,_peroxisomal-like
LOC121408007	6.27474	13.065	28.3449	4.93463	11.9586	8.92695	23.5778	24.6903	3.93798	4.96567	6.24524	15.878	8.17591	4.43426	2.51611	uncharacterized_LOC121408007
LOC121408008	0	4.64565	0	6.31674	0	0	5.38956	0	0	0	11.9916	0	0	9.46037	0	uncharacterized_LOC121408008
LOC121408011	0	2.41892	0	0	0	0	0	0	0	0	2.08129	0	6.81177	0	0	ATM_interactor-like
LOC121408012	0	4.87767	5.95251	0	0	0	5.65874	4.36634	0	8.34244	0	21.3403	0	0	0	glucose-fructose_oxidoreductase_domain-containing_protein_2-like
LOC121408015	233.599	188.723	303.589	113.724	274.814	237.383	363.246	368.593	44.6019	249.42	284.167	267.408	414.692	144.118	52.0393	uncharacterized_protein_C1orf109-like
LOC121408016	0	21.1263	0	0	19.3372	0	0	25.2154	6.36775	0	18.1775	0	19.8308	0	0	28S_ribosomal_protein_S17,_mitochondrial-like
LOC121408017	0	2.98978	0	1.01631	0	0	0	0	2.02761	6.39189	0	0	0	0	0	RNA_polymerase_II_subunit_A_C-terminal_domain_phosphatase-like
LOC121408019	28.8827	16.7051	10.1931	11.3571	0	0	58.1403	14.9539	0	0	28.7469	0	15.6807	0	0	transmembrane_protein_208-like
LOC121408021	341.228	514.329	912.304	142.307	114.956	436.072	582.812	503.24	40.559	132.974	499.143	274.739	409.81	237.486	62.195	speriolin-like_protein
LOC121408024	0	0	11.3399	2.52696	0	1.63263	8.62419	3.32726	10.0829	14.3036	1.59905	10.1637	0	11.3536	17.7164	HEAT_repeat-containing_protein_3-like
LOC121408025	0	0	0	1.58999	0	0	0	0	0	0	0	2.55803	0	0	4.05359	uncharacterized_LOC121408025
LOC121408026	5.60583	42.1498	39.5676	0	2.96771	5.69665	33.8533	40.6336	0	19.4089	11.1589	0	39.5651	0	0	6-phosphogluconolactonase-like
LOC121408027	74.3789	97.58	94.7538	56.3536	169.989	102.315	102.25	81.715	7.11579	36.7885	87.5711	83.7779	54.1698	66.2371	22.7326	solute_carrier_family_66_member_2-like
LOC121408028	126.698	151.856	105.589	14.4056	48.487	100.829	137.251	118.55	4.79005	57.381	115.467	166.097	104.422	34.1601	22.954	phosphoribosylformylglycinamidine_synthase-like
LOC121408029	2.83917	9.85269	0	0	3.0061	0	0	0	0	0	0	14.3689	0	0	0	Y+L_amino_acid_transporter_2-like
LOC121408030	0	11.8653	0	2.01668	0	0	0	0	0	0	2.55229	0	2.78443	3.02031	0	vacuolar_protein_sorting-associated_protein_35-like
LOC121408034	1.14191	0	16.1199	5.38819	1.20905	0	1.53243	7.09465	0.597213	0	0	0	3.71975	1.34495	0	zinc_finger_CCCH_domain-containing_protein_13-like
LOC121408035	4.66472	3.5973	0	0	1.64633	0	0	0	0	0	0	0	0	0	1.55876	protein_fantom-like
LOC121408036	70.8745	166.311	65.7475	28.6651	105.058	51.4448	146.745	73.39	0	32.0504	94.7268	143.476	30.7829	45.3158	2.03	uncharacterized_LOC121408036
LOC121408037	0	0	5.34128	0	0	0	0	0	0	0	0	0	0	0	0	lysosomal_protective_protein-like
LOC121408039	251.261	313.006	409.263	30.3998	143.249	353.536	427.971	390.268	0	105.157	250.08	440.175	230.852	79.6753	0	uncharacterized_LOC121408039
LOC121408040	3.13264	10.8711	2.21111	1.2318	4.97523	1.59169	6.30595	6.48764	0	7.74716	4.67686	13.8723	5.10224	3.68964	0	vesicle-associated_membrane_protein-associated_protein_A-like
LOC121408042	1.84816	4.27574	2.60897	0	0	0	0	1.91375	0	0	0	0	0	2.17677	0	trafficking_protein_particle_complex_subunit_8-like
LOC121408043	5.93381	6.86397	0	0	6.28268	0	5.97232	0	1.55167	1.46746	7.38238	0	0	0	4.46137	leucine-rich_repeat_extensin-like_protein_2
LOC121408044	0	2.545	0	0	0	0	0	0	0	0	0	0	0	0	0	L-fucose_kinase-like
LOC121408046	0	6.64706	0	9.03809	0	11.6788	7.71146	0	0	0	0	0	0	0	0	uncharacterized_LOC121408046
LOC121408050	0	5.05812	0	0	0	0	0	0	0	0	0	5.53246	0	0	0	2,4-dienoyl-CoA_reductase_[(3E)-enoyl-CoA-producing],_mitochondrial-like
LOC121408051	0	0	2.74083	0	0	1.97302	0	6.03144	0	3.84127	0	0	0	0	11.6783	2,4-dienoyl-CoA_reductase_[(3E)-enoyl-CoA-producing],_mitochondrial-like
LOC121408052	0	10.3219	0	0	0	0	0	0	0	0	0	0	4.84446	0	0	rhophilin-1-like
LOC121408053	0	21.7911	13.2965	0	0	3.19054	0	3.25111	4.92609	9.31748	3.12492	0	3.40914	0	0	protein_SSXT-like
LOC121408054	0	0	6.7531	0	0	0	0	0	5.0038	0	0	0	0	0	0	nuclear_transport_factor_2-like
LOC121408055	6.23351	25.2373	13.1994	4.9022	16.5	9.50173	29.2785	3.22737	4.89012	30.8315	31.021	15.7737	10.1527	25.6965	3.12447	core-binding_factor_subunit_beta-like
LOC121408057	1.46997	0	1.03755	0	0.778197	0	2.95902	0.761071	2.69074	0	2.19459	2.78978	1.59613	0	5.89444	transcription_initiation_factor_TFIID_subunit_4-like
LOC121408058	0	6.0395	11.0555	0	0	0	0	0	1.36529	0	0	3.30293	5.66915	0	0	dynein_regulatory_complex_subunit_4-like
LOC121408062	0	0	0	1.20095	0	0	0	0	1.59732	1.51063	3.03982	0	9.9489	1.79862	0	homocysteine-responsive_endoplasmic_reticulum-resident_ubiquitin-like_domain_member_2_protein
LOC121408065	0	3.65274	0	0	0	6.4178	0	0	4.95444	6.2474	3.1429	0	0	0	6.33113	Bardet-Biedl_syndrome_10_protein_homolog
LOC121408067	9.76834	11.2996	10.3422	9.60261	10.3427	4.96329	0	10.115	0	12.0788	7.2918	9.26942	15.91	0	12.2406	tetratricopeptide_repeat_protein_5-like
LOC121408068	0	20.5959	0	0	0	0	0	0	0	0	0	0	0	0	0	uncharacterized_LOC121408068
LOC121408069	1.07935	1.24854	0	0	2.28561	0	0	0	0	0	2.14854	0	2.34396	0	0	mitogen-activated_protein_kinase_kinase_kinase_7-like
LOC121408070	0	21.6627	0	9.20469	12.3926	4.75762	6.28289	7.27191	23.2611	2.31565	9.31952	14.8088	17.7925	5.51422	9.38674	craniofacial_development_protein_1-like
LOC121408071	14.0453	108.314	79.3088	195.139	193.324	28.5457	75.3947	43.6315	19.5883	83.3634	23.2988	88.8531	25.4179	137.856	37.5469	transmembrane_protein_170A-like
LOC121408072	0	0	16.9284	0	8.46462	0	0	12.4175	2.09056	0	0	0	0	0	0	endonuclease/exonuclease/phosphatase_family_domain-containing_protein_1-like
LOC121408074	0	13.171	0	0	15.0695	0	3.82002	0	0	11.2634	2.83315	7.20306	9.27249	6.70533	0	dolichyl-phosphate_beta-glucosyltransferase-like
LOC121408077	0	15.3226	0	0	0	0	0	6.85816	0	3.27585	0	8.37977	3.59576	0	0	unconventional_prefoldin_RPB5_interactor-like
LOC121408079	5.77654	0	0	4.54283	0	0	0	0	0	0	0	0	6.2723	6.80364	0	protein_D2-like
LOC121408080	47.1177	22.7099	29.5618	2.05859	23.5582	37.2407	33.3721	8.13166	4.10703	15.5365	40.3828	26.4955	1.42115	16.9569	2.62413	tumor_protein_p53-inducible_nuclear_protein_2-like
LOC121408082	0	5.95253	0	4.04686	5.44842	0	0	0	0	0	0	6.51074	0	0	0	exosome_complex_component_RRP43-like
LOC121408083	0	0	0	4.30339	0	0	0	0	0	0	5.44634	0	0	0	0	uncharacterized_protein_F13E9.13,_mitochondrial-like
LOC121408084	0	0	0	2.14482	2.88765	0	0	0	0	0	0	0	5.92272	0	0	G1/S-specific_cyclin-E
LOC121408085	0	3.43796	0	0	0	0	3.98848	0	0	0	0	0	0	0	0	E3_ubiquitin-protein_ligase_TRAF7-like
LOC121408086	0	0	17.0795	0	6.40512	0	0	0	6.32764	0	0	0	0	0	0	chromosome_transmission_fidelity_protein_8_homolog
LOC121408087	5.29848	0	7.47964	0	0	0	7.1105	0	0	0	0	0	0	0	0	cytosolic_iron-sulfur_assembly_component_2B-like
LOC121408088	0	2.95744	0	0	0	0	0	0	0	0	0	0	0	0	0	DDB1-_and_CUL4-associated_factor_11-like
LOC121408089	0	1.60331	0	0	0	0	1.86004	0	1.44977	1.37109	0	0	0	0	0	protein_CBFA2T1-like
LOC121408090	0	0	0	3.03565	0	0	0	0	2.69171	2.54562	0	0	0	0	2.57974	maestro_heat-like_repeat-containing_protein_family_member_1
LOC121408091	7.90411	36.5725	3.7193	74.5921	27.8961	16.0643	35.3574	27.2821	122.636	39.0945	13.1116	50.0027	14.3041	49.6507	97.7254	paraplegin-like
LOC121408093	0	6.30069	11.5336	19.276	2.88355	0	0	0	7.12167	2.69407	8.13187	13.7831	2.95716	6.41534	0	uncharacterized_LOC121408093
LOC121408095	14.154	6.5491	0	0	5.99447	0	7.59781	0	0	0	11.27	17.9081	0	3.33413	0	pre-mRNA-splicing_factor_ATP-dependent_RNA_helicase_PRP16-like
LOC121408096	0	4.96072	0	0	0	0	0	0	0	0	0	0	0	0	0	pre-mRNA-splicing_factor_ATP-dependent_RNA_helicase_PRP16-like
LOC121408112	85.4594	108.741	32.1705	2.24025	21.1129	89.7386	99.3941	44.2462	10.4288	28.1793	36.8582	61.2714	21.6519	23.4861	2.8557	uncharacterized_LOC121408112
LOC121408114	0	149.113	0	0	27.297	0	34.5981	0	0	0	25.66	0	0	0	0	uncharacterized_LOC121408114
LOC121408115	44.4306	0	10.4535	0	0	3.76253	14.9063	0	9.68205	0	0	14.0538	0	0	0	uncharacterized_LOC121408115
LOC121408116	0	3.54988	0	0	0	0	0	0	0	0	0	0	0	0	3.07642	protein_Jumonji-like
LOC121408122	0	0	0	4.04957	0	0	0	0	2.69306	0	5.12511	0	0	6.06491	0	uncharacterized_LOC121408122
LOC121408128	0.676243	0	1.90925	0	0.716002	0.687198	1.81502	0.700244	1.06101	0	0	0	0.73428	0	0.677917	uncharacterized_LOC121408128
LOC121408131	11.1083	8.03102	15.6811	9.82788	8.82107	18.3435	18.6341	12.9404	2.90479	9.61499	8.29207	17.5683	7.53855	11.448	4.17593	uncharacterized_LOC121408131
LOC121408133	0	0	7.02427	0	0	10.113	6.6776	0	0	9.84451	0	0	10.8059	0	0	uncharacterized_LOC121408133
LOC121408139	0	12.1825	7.4335	0	11.1508	10.7022	7.06664	0	0	15.6271	10.4821	0	40.024	6.20208	15.8365	proteasome_subunit_beta_type-5-like
LOC121408140	4.91018	7.57318	4.62099	0	0	13.3059	4.39294	0	6.84797	3.23816	22.8064	6.21252	1.7772	3.85549	0	E3_ubiquitin-protein_ligase_Su(dx)-like
LOC121408142	24.0651	0	0	4.73137	6.37	0	16.1476	12.4596	3.14648	0	0	15.224	6.53262	28.3441	0	uncharacterized_LOC121408142
LOC121408143	1.92166	1.11145	0	0	0	1.95279	1.28942	1.98986	0	3.80188	1.91262	1.21567	0	1.13167	0.963209	piezo-type_mechanosensitive_ion_channel_component_2-like
LOC121408147	0	4.66026	5.68719	0	0	0	0	0	0	0	0	0	0	18.9803	0	ER_degradation-enhancing_alpha-mannosidase-like_protein_2
LOC121408148	136.381	588.969	250.28	203.782	442.825	272.561	469.756	188.295	45.1733	292.306	190.036	442.888	54.298	128.504	95.7031	uncharacterized_LOC121408148
LOC121408149	1.19409	6.90637	0	0	0	1.21344	0	0	0	0	0	0	0	0	4.7882	uncharacterized_LOC121408149
LOC121408150	48.4108	61.5995	0	3.80716	35.8799	39.3561	25.9867	30.0774	17.723	19.1555	33.7282	24.5004	10.5131	57.0185	4.85307	centrosomal_protein_of_290_kDa-like
LOC121408151	0	5.11931	2.08246	0	0	1.49909	1.97969	0	0	0	2.93651	7.46584	0	0	0	solute_carrier_family_12_member_4-like
LOC121408153	0.890811	1.54568	0	0	0	0.905242	0	0.461213	0	0	0	0	0	0	0.446508	dynein_heavy_chain_5,_axonemal-like
LOC121408156	0	10.2623	25.0473	0	0	0	0	0	0	0	0	0	9.63297	0	0	uncharacterized_LOC121408156
LOC121408157	0.612957	4.96329	25.0932	6.26659	0.648994	4.3602	1.64516	24.7537	0.320572	3.63809	0.610074	0.775533	8.65231	5.05361	1.22895	neurofibromin-like
LOC121408161	6.5862	19.0466	0	2.58978	0	3.34645	8.8386	0	17.2227	9.77278	0	4.16654	0	15.5145	3.30125	matrilysin-like
LOC121408162	0	2.98827	0	0	0	0	0	0	0	0	0	0	0	0	0	matrix_metalloproteinase-19-like
LOC121408164	0	3.59657	0	7.33544	0	0	0	0	0	0	0	0	0	0	0	leupaxin-like
LOC121408166	0	0	40.5742	2.26037	0	0	11.5715	47.6197	0	0	0	0	3.1209	0	0	complement_component_1_Q_subcomponent-binding_protein,_mitochondrial-like
LOC121408167	48.4464	14.0102	136.779	12.6999	25.6474	36.9234	32.5073	41.8049	0	15.9747	52.2368	45.972	52.6042	38.0403	0	uncharacterized_LOC121408167
LOC121408169	0	1.07164	0	0	0	0.941427	0	0	0.484511	0	0	5.86068	0	0	0	GAS2-like_protein_pickled_eggs
LOC121408171	4.57718	0	6.46141	1.79981	0	2.32566	0	0	0	11.3196	0	2.8956	0	0	0	septin-5-like
LOC121408172	0	0	0	1.5925	0	0	0	0	0	0	0	0	0	0	2.03	WD_repeat_and_SOCS_box-containing_protein_1-like
LOC121408173	46.1949	73.4749	61.1357	81.7402	73.3664	73.3489	30.9965	53.8138	6.03991	25.7045	83.3346	40.1826	18.8098	105.417	20.2603	nucleoredoxin-like
LOC121408174	0	2.27031	0	0.771741	0	0	0	0	0.513226	0.970745	3.90684	0	0	0	0	ribosomal_protein_S6_kinase_beta-1-like
LOC121408176	4.14167	0	5.84662	19.5427	83.3183	12.6263	5.55807	4.28866	2.16606	4.09701	0	0	8.99424	82.9274	8.30385	glyoxalase_domain-containing_protein_4-like
LOC121408177	0	0	4.27829	0	0	0	28.47	0	0	0	0	0	0	0	0	lengsin-like
LOC121408179	12.7157	11.7671	0	7.99995	2.69265	31.0119	27.3028	7.90017	3.99012	0	43.0299	12.8706	8.28416	14.9766	0	coiled-coil_domain-containing_protein_63-like
LOC121408180	6.55529	37.9143	0	15.4658	0	0	43.9856	0	0	0	6.52446	8.29397	0	0	6.57152	TLC_domain-containing_protein_fld-1-like
LOC121408181	0	14.0353	3.42561	3.81678	2.56933	0	0	0	0	0	0	0	0	2.85813	0	heparanase-like
LOC121408183	0	4.78124	0	0.812638	3.28224	0	0	0	0	1.02219	3.08541	0	0	0	0	fibropellin-1-like
LOC121408185	6.93706	0	17.1373	0	3.67246	14.0989	0	14.3665	0	0	22.4394	0	5.64931	0	1.73856	proteoglycan_4-like
LOC121408191	13.813	25.5653	35.0986	0	2.92503	22.4588	37.0738	5.7213	2.88964	5.46563	21.9969	13.9813	0	0	5.53888	rhodopsin,_GQ-coupled-like
LOC121408196	4.24777	8.18939	0	0	2.99834	2.87772	0	0	1.48104	5.60263	1.40926	1.79147	0	6.67073	0	serine/arginine_repetitive_matrix_protein_2-like
LOC121408197	18.9699	10.9718	0	0	0	0	0	0	0	0	0	0	0	11.1714	0	peroxisomal_membrane_protein_2-like
LOC121408198	0	0	9.05802	0	4.52923	0	5.74066	2.21477	0	0	2.1288	0	0	12.5958	4.28832	NF-X1-type_zinc_finger_protein_NFXL1-like
LOC121408199	0	3.82736	0	2.60205	3.50323	0	4.44023	0	1.73043	0	0	0	0	0	6.63378	integral_membrane_protein_DGCR2/IDD-like
LOC121408200	0	2.60086	0	1.76821	0	0	0	0	0	0	0	0	0	5.29637	0	inositol_oxygenase-like
LOC121408202	0	2.80351	0	1.90598	0	0	0	0	2.53505	0	0	0	2.63159	0	2.42959	A-kinase_anchor_protein_1,_mitochondrial-like
LOC121408204	190.212	484.752	780.371	659.123	333.562	341.284	490.583	790.931	121.241	599.765	440.756	815.998	396.938	168.025	137.054	uncharacterized_LOC121408204
LOC121408207	0	0	2.05251	0	0	1.47753	0	0	0	0	0	0	3.15752	0	0	copper-transporting_ATPase_1-like
LOC121408210	0	1.8773	0	0	0	1.64919	0	1.6805	0	1.6054	0	0	0	0	0	bolA-like_protein_2
LOC121408211	0	0	0	3.0701	8.26676	7.9342	0	0	0	0	0	0	0	0	0	small_integral_membrane_protein_14-like
LOC121408212	0	7.73241	0	0	0	0	0	0	0	0	4.43542	0	0	0	0	ras-related_protein_Rab-35-like
LOC121408213	0	1.29079	0	2.63266	1.18148	1.13395	0	0	0.583595	1.10384	0	0	1.21164	0	0	ubiquitin-protein_ligase_E3A-like
LOC121408214	58.722	90.5694	4.6053	76.9676	79.4452	26.5215	56.9142	0	0	41.9531	87.6688	49.5314	0	15.3696	0	uncharacterized_LOC121408214
LOC121408215	0	7.18732	0	0	0	0	0	3.21693	0	0	3.09206	0	3.37329	0	0	trichoplein_keratin_filament-binding_protein-like
LOC121408217	0	16.409	4.00497	6.69346	3.00388	14.4152	11.422	0	0	0	8.4712	10.7687	0	3.34152	0	monocarboxylate_transporter_6-like
LOC121408220	0	1.79357	0	2.43873	3.28335	1.57563	0	3.21109	0	0	6.17289	1.96176	0	0	0	beta-sarcoglycan-like
LOC121408223	0	6.62971	0	0	0	0	0	0	0	0	5.70434	0	0	0	0	uncharacterized_LOC121408223
LOC121408231	0	0	6.06005	3.37602	4.54526	0	1.92032	2.96348	0	0	0	0	0	1.68539	0	arginine/serine-rich_coiled-coil_protein_2-like
LOC121408233	0	0	4.50768	0	3.38092	0	4.28521	9.91954	0	0	0	4.04012	6.93446	3.76095	0	leucine-rich_repeat-containing_protein_43-like
LOC121408235	0	0	18.106	0	0	0	0	4.42708	0	0	0	0	0	0	0	transmembrane_protein_134-like
LOC121408238	0	0	89.632	0	0	0	0	0	0	0	0	0	68.9434	0	0	uncharacterized_LOC121408238
LOC121408243	0	0	0	3.55828	0	0	0	4.6852	0	0	0	0	0	0	0	lactadherin-like
LOC121408253	0	4.64322	0	0	0	0	0	0	0	0	1.99756	0	0	0	0	forkhead_box_protein_Q1-like
LOC121408255	0	12.818	0	0	0	0	0	3.82475	0	0	0	0	0	0	0	calcium-binding_protein_LPS1-beta-like
LOC121408256	0	0	0	4.13126	36.1533	5.33829	7.04972	0	0	0	0	0	0	3.09362	0	E3_ubiquitin-protein_ligase_AMFR-like
LOC121408257	0	1.38818	0	2.83128	1.27062	0	0	0	1.25525	0	1.19442	0	2.60611	0	1.20303	protein_arginine_N-methyltransferase_7-like
LOC121408260	0	11.7038	0	0	0	0	0	0	0	0	0	0	0	0	0	tyrosine_aminotransferase-like
LOC121408261	5.28754	3.0582	7.46419	2.07913	0	2.6866	0	2.7376	0	0	5.26268	0	17.224	0	0	cytochrome_b5-like
LOC121408262	0	0	0	12.8552	5.76915	0	0	0	0	10.7801	0	6.89399	0	6.41762	0	acyl-coenzyme_A_diphosphatase_FITM2-like
LOC121408269	5.6243	0	11.9094	8.84621	0	2.85771	7.54775	0	0	8.34549	0	0	0	0	0	ileal_sodium/bile_acid_cotransporter-like
LOC121408270	34.9615	55.6077	0	0	41.6442	53.2919	70.3769	13.5759	15.9991	73.4922	56.5453	44.2345	0	25.7362	4.38101	ileal_sodium/bile_acid_cotransporter-like
LOC121408271	0	0	2.46881	0	1.8517	1.7772	0	0	2.74394	0	0	0	1.89897	0	0	ileal_sodium/bile_acid_cotransporter-like
LOC121408272	0	0	336.219	0	0	3.4576	0	35.2324	0	0	0	0	11.0835	0	0	solute_carrier_family_10_member_6-like
LOC121408275	32.7625	28.4236	11.5623	0	0	8.3233	0	0	0	0	16.3042	0	17.7871	19.2939	0	NADH_dehydrogenase_[ubiquinone]_iron-sulfur_protein_6,_mitochondrial-like
LOC121408276	3.44057	15.9196	4.85691	2.70576	0	3.49631	0	3.56268	0	0	0	8.70625	0	0	0	xaa-Pro_dipeptidase-like
LOC121408278	2.26765	2.62312	0	0	0	0	0	0	1.18596	0	0	0	2.46226	0	0	nuclear_pore_complex_protein_Nup93-like
LOC121408279	0	8.81659	0	2.997	0	3.87265	0	11.8385	1.99308	0	7.58598	4.82169	0	0	15.2814	uncharacterized_LOC121408279
LOC121408280	61.2569	38.8583	53	4.66201	27.1987	78.3135	42.4289	149.37	3.10035	13.6831	68.8358	60.0033	85.8246	9.30951	3.96184	flap_endonuclease_1-like
LOC121408281	9.48494	16.4576	0	0	0	0	0	19.6431	2.48028	0	0	12.0007	0	0	0	leucine-rich_repeat-containing_protein_69-like
LOC121408282	0	0	0	3.49853	0	0	0	0	0	4.40067	4.42772	0	0	0	0	WD_repeat-containing_protein_88-like
LOC121408283	0	14.0508	0	0	0	0	0	0	0	0	0	0	0	0	0	uncharacterized_LOC121408283
LOC121408285	3.37261	0	0	5.30462	0	0	9.05199	0	0	10.0087	3.35675	4.26713	7.3241	0	0	arrestin_domain-containing_protein_3-like
LOC121408286	0	63.1893	0	0	12.3938	0	0	0	2.04066	7.71962	0	0	0	0	0	arrestin_domain-containing_protein_3-like
LOC121408287	0	0	7.84483	0	0	0	0	0	0	2.74863	0	0	3.01705	0	0	N6-adenosine-methyltransferase_subunit_METTL3-like
LOC121408288	3.59681	12.4819	5.07747	2.82863	19.0414	21.9305	9.65377	0	0	7.11607	25.0593	27.3049	0	50.8362	0	putative_nuclease_HARBI1
LOC121408291	0	0	0	1.51352	0	0	5.16544	1.99285	0	0	0	2.435	6.26915	0	5.78794	derlin-1-like
LOC121408293	0	0	6.88383	0	5.16312	0	0	0	0	2.41192	0	0	7.94239	0	0	multidrug_and_toxin_extrusion_protein_2-like
LOC121408294	2.72827	3.15594	0	0	0	0	0	0	0	0	0	0	2.96241	0	0	RNA_pseudouridylate_synthase_domain-containing_protein_2-like
LOC121408297	0	1.22954	1.50048	0	0	0	0	0	0	0	0	1.34484	0	0	0	cingulin-like
LOC121408299	0	1.24907	1.52431	0	0	0	0	1.11813	0	0	4.2989	1.3662	0	0	0	puratrophin-1-like
LOC121408301	0	1.78624	0	0	1.08998	1.04613	0	1.06599	2.15358	0.509176	0	0	0	0	0	zinc_finger_homeobox_protein_3-like
LOC121408303	0	5.60702	0	0	0	0	0	10.0384	0	0	0	0	0	0	0	thiamine-triphosphatase-like
LOC121408305	0	0	0	17.4623	0	0	0	7.66423	0	0	0	9.36467	8.03676	0	0	NADH_dehydrogenase_[ubiquinone]_1_beta_subcomplex_subunit_9-like
LOC121408306	0	3.17397	0	4.31569	0	0	0	0	0	0	0	3.47162	5.95868	0	0	brain-specific_homeobox/POU_domain_protein_3-like
LOC121408307	16.5399	23.9158	29.1859	19.5112	13.1343	25.2118	44.3928	0	6.4877	4.0904	32.9243	31.3903	22.4493	19.4808	4.14522	glutamic_acid-rich_protein-like
LOC121408308	0	0	8.66252	8.04308	0	0	2.745	0	2.13954	0	6.10756	2.588	4.44204	0	0	malonate--CoA_ligase_ACSF3,_mitochondrial-like
LOC121408310	0	8.32128	27.9261	5.65727	1.90414	12.7928	9.65377	7.44894	0.940555	0	5.36985	0	9.76376	0	0	uncharacterized_LOC121408310
LOC121408311	0	2.39642	0	0	2.19347	0	1.39008	1.0726	0	2.04934	2.06193	0	1.12473	0	0	uncharacterized_LOC121408311
LOC121408312	0	7.33261	0	0	3.35582	3.22081	0	3.28196	0	3.1353	18.9274	0	13.7659	0	15.8866	39S_ribosomal_protein_L3,_mitochondrial-like
LOC121408313	0	0	1.68121	0	0	0	3.19647	0	0	5.89053	0	0	0	0	0	transcription_initiation_factor_TFIID_subunit_1-like
LOC121408315	0	7.80599	14.2892	2.65347	0	0	0	0	0	0	3.35822	8.53801	0	0	0	uncharacterized_LOC121408315
LOC121408316	0	0	8.18732	0	0	0	0	0	0	0	0	0	0	0	0	aspartate_aminotransferase,_mitochondrial-like
LOC121408318	0	0	8.38135	0	0	0	0	6.14797	4.65771	2.93662	0	0	9.67019	0	0	ribosome_biogenesis_protein_bop1-B-like
LOC121408320	3.39571	7.85602	2.39679	1.33524	0	0	0	1.75812	0	0	0	0	5.53071	0	0	NPC_intracellular_cholesterol_transporter_1-like
LOC121408321	0	0	0	2.44862	3.29665	0	0	0	0	3.08003	0	0	0	0	0	T-cell_differentiation_antigen_CD6-like
LOC121408323	0	3.24348	0	0	0	0	0	0	0	0	0	3.54764	0	0	0	soluble_scavenger_receptor_cysteine-rich_domain-containing_protein_SSC5D-like
LOC121408325	5.05447	11.6936	7.13518	0	0	0	0	13.0847	0	2.49999	0	0	2.74413	2.97659	2.53349	charged_multivesicular_body_protein_4b-like
LOC121408326	0	14.7954	24.0743	0	0	0	0	30.9036	0	0	0	0	50.9232	5.02156	4.27404	programmed_cell_death_protein_6-like
LOC121408327	8.2522	1.90916	0	5.1918	0	0	8.85948	0	0.863169	1.63264	1.64268	2.08819	1.79208	1.9439	1.65453	low-density_lipoprotein_receptor-related_protein_3-like
LOC121408328	0	4.5952	0	3.12407	4.20605	0	21.3241	0	0	0	0	0	0	0	0	amine_oxidase_[flavin-containing]_B-like
LOC121408330	6.94857	5.35853	0	5.46454	7.3571	23.5371	0	0	3.63405	6.87365	25.3583	0	0	13.6401	2.32192	transmembrane_protein_231-like
LOC121408331	0	0	0	2.1395	1.44024	0	1.82546	7.04273	0.711411	0	0	0	11.8161	1.60213	0	gamma-aminobutyric_acid_receptor-associated_protein-like_2
LOC121408332	3.09541	3.58063	0	0	0	0	8.308	0	0	9.18609	3.08085	58.7461	0	0	0	neuropeptide_Y_receptor_type_1-like
LOC121408335	5.53573	0.914784	0	0	0	9.64355	0	0.818885	0	2.34687	3.1484	0	1.71738	3.72572	0.792776	CCR4-NOT_transcription_complex_subunit_1-like
LOC121408336	0	0	6.17976	1.72136	0	0	2.93738	2.26652	3.43423	2.16523	0	0	0	0	0	DNA_repair-scaffolding_protein-like
LOC121408337	4.3065	4.98157	0	0	0	0	0	0	0	0	0	5.44873	0	0	0	uncharacterized_LOC121408337
LOC121408338	0	2.37878	2.90296	0	2.17733	10.4487	0	2.12941	0	0	6.14026	2.60185	6.69873	2.42207	0	uncharacterized_LOC121408338
LOC121408340	61.0069	188.187	63.1552	57.5729	60.2874	61.9952	76.4124	151.613	55.304	36.2094	24.288	46.3127	260.554	81.4348	57.0807	CCAAT/enhancer-binding_protein_alpha-like
LOC121408342	0	0	0	5.14647	0	0	0	0	0	0	0	0	0	0	0	UPF0547_protein_C16orf87_homolog
LOC121408343	0	2.40778	0	0	4.40775	0	0	0	0	0	0	0	0	0	0	Y+L_amino_acid_transporter_2-like
LOC121408344	3.16425	0	0	2.48845	0	0	0	0	1.65488	3.13013	9.44811	0	0	0	0	DNA_replication_factor_Cdt1-like
LOC121408346	6.92893	0	1.95625	0	0	0	0	2.86994	0	0	2.75854	3.50668	1.50472	1.63219	1.38922	probable_aminopeptidase_NPEPL1
LOC121408348	1.10258	0	0	0.867101	0	2.24089	0	0	0	0	0	1.39502	2.39442	2.59726	1.10531	cytosolic_arginine_sensor_for_mTORC1_subunit_2-like
LOC121408349	0	4.9073	0	0	0	4.31102	51.238	0	0	0	0	5.36749	0	0	0	uncharacterized_LOC121408349
LOC121408350	0	0	0	0.4353	0	0	0	0	0	0	0	0	0	0	0	unconventional_myosin-XVIIIa-like
LOC121408352	45.667	31.0739	18.9606	21.1257	85.3269	30.0279	54.0746	41.7245	14.0491	21.2586	45.4522	64.5769	23.3347	50.6229	8.07883	piggyBac_transposable_element-derived_protein_4-like
LOC121408355	0	4.32043	0	0	0	0	0	0	0	0	0	0	0	0	0	retinol_dehydrogenase_12-like
LOC121408356	0	4.50209	0	0	0	0	0	0	0	0	7.74739	4.92428	0	0	0	INO80_complex_subunit_E-like
LOC121408357	185.336	220.106	111.629	86.4803	240.712	173.271	240.428	80.6038	25.8479	129.559	152.491	200.101	60.3726	164.445	22.2954	uncharacterized_LOC121408357
LOC121408358	0	1.66988	2.03786	0	3.05693	1.46698	0	8.96896	0	4.28408	10.0576	5.47944	1.56749	1.70027	0	uncharacterized_LOC121408358
LOC121408359	2.20643	2.5523	3.11472	3.4704	4.67231	8.9687	17.766	13.7085	0	0	4.39211	5.5833	0	0	0	uncharacterized_LOC121408359
LOC121408361	1.38929	1.60708	0	1.09258	1.47098	0	0	0	0	0	0	0	3.01705	0	0	jouberin-like
LOC121408363	8.2522	0	0	6.48975	0	0	11.0744	0	0	0	0	0	0	0	0	uncharacterized_LOC121408363
LOC121408365	16.7996	11.1046	5.08183	1.88738	8.25837	20.1202	18.5189	3.10639	1.56894	11.8703	15.5262	11.3868	1.95443	3.53332	7.21763	neurogenic_locus_notch_homolog_protein_1-like
LOC121408366	9.14347	2.64419	0	7.19067	43.5647	2.3229	58.2845	7.10099	3.58648	47.4856	20.4761	23.1372	4.96409	5.38461	0	nucleolar_complex_protein_4_homolog
LOC121408367	7.92552	16.0438	11.1881	20.2567	45.1042	8.05391	15.9539	11.2844	2.07249	21.5602	10.8463	15.0414	11.8328	9.33472	2.97943	LIM_domain_kinase_1-like
LOC121408368	0	0	13.9402	0	3.48522	10.035	0	0	0	3.2562	0	0	0	0	0	mitochondrial_RNA_pseudouridine_synthase_Rpusd4-like
LOC121408369	0	3.7247	0	2.53226	0	0	0	0	1.68401	3.18523	0	0	3.49629	3.79247	0	anaphase-promoting_complex_subunit_7-like
LOC121408372	0	0	5.55039	5.1535	48.5683	0	15.8294	0	0	0	0	6.63291	7.11545	4.63093	1.31385	lysosome_membrane_protein_2-like
LOC121408373	0	0	54.1822	0	0	0	0	19.8721	0	0	0	0	48.6221	0	32.0642	ras-related_protein_Rab-3A-like
LOC121408376	0	4.54662	0	1.03035	0	0	0	0	0	0	0	0	0	0	0	golgin_subfamily_A_member_4-like
LOC121408377	0	0	0	3.33441	0	0	0	0	0	0	0	1.78818	0	0	0	xanthine_dehydrogenase/oxidase-like
LOC121408380	0	3.27334	0	0	2.99613	0	0	0	0	0	0	0	0	0	0	72_kDa_type_IV_collagenase-like
LOC121408381	0	0	3.27658	0	0	0	0	7.2104	0	0	4.62034	0	15.1217	0	2.32683	leucine-zipper-like_transcriptional_regulator_1
LOC121408382	0	7.16993	4.37494	2.43726	0	0	12.4771	16.0457	0	0	3.08458	0	0	3.6502	0	density-regulated_protein-like
LOC121408386	0	2.41301	0	0	0	0	0	0	0	0	0	0	0	2.45692	0	aromatic-L-amino-acid_decarboxylase-like
LOC121408387	0	0	4.23817	4.72213	3.17878	0	0	6.21764	0	0	0	0	0	0	0	CCR4-Not_complex_3'-5'-exoribonuclease_subunit_Ccr4-like
LOC121408391	0	1.45049	3.54022	0	0	2.54848	5.04826	6.49214	0	0	1.24803	0	0	0	0	solute_carrier_family_15_member_4-like
LOC121408393	0	2.65763	0	0	0	4.66941	0	0	0	0	0	0	0	0	0	zinc_finger_protein_37-like
LOC121408397	0.53561	0	0	0.421219	0	0	0	0	0	0	0	0	0	0.630845	0	dynein_heavy_chain_10,_axonemal-like
LOC121408400	0	1.47016	0	0	0	0	0	0	1.32938	0	0	0	0	0	0	leucine-rich_repeat_and_WD_repeat-containing_protein_1-like
LOC121408406	55.6358	93.6102	149.937	19.888	133.879	205.589	67.8751	41.8985	5.29039	30.0196	125.85	134.385	38.4431	53.6139	0	uncharacterized_LOC121408406
LOC121408416	0	0	2.75056	1.53233	0	0	0	0	0	0	1.9393	0	6.34706	0	0	T-complex_protein_1_subunit_zeta-like
LOC121408418	0	0	11.317	0	0	0	0	0	0	0	2.65971	0	0	0	0	uncharacterized_LOC121408418
LOC121408419	0	0	10.0935	0	0	3.63297	9.59537	0	0	0	0	0	3.88188	0	14.3356	malate_dehydrogenase,_mitochondrial-like
LOC121408421	18.6325	14.3688	0	16.2812	26.3039	6.31144	11.1131	8.57502	0	8.19182	18.5449	15.7163	20.2316	7.31515	0	serine/threonine/tyrosine-interacting-like_protein_1
LOC121408430	0.424934	1.47463	0	0	0	0.431817	0.570256	0.440015	0	0	0	0	0	0	0	E3_ubiquitin-protein_ligase_HERC2-like
LOC121408431	727.581	1156.97	994.575	294.398	668.728	760.827	1125.83	580.459	46.1845	493.751	909.499	966.709	429.406	379.861	96.2246	uncharacterized_LOC121408431
LOC121408435	0	1.37189	0	0	0	1.2052	0	1.22808	0	0	0	0	2.57553	0	2.37784	uncharacterized_protein_F59B2.12-like
LOC121408436	0	43.3518	0	0	0	0	25.1469	0	0	0	0	0	0	0	0	uncharacterized_LOC121408436
LOC121408438	0	4.38005	0	5.9556	0	0	0	0	0	0	0	0	0	0	0	tripartite_motif-containing_protein_2-like
LOC121408439	0	0	15.0423	0	0	0	0	0	0	0	0	3.3705	0	0	0	uncharacterized_LOC121408439
LOC121408440	0	0	2.14295	1.19383	0	0	0	3.14383	0	1.50167	3.0218	1.92067	6.59328	0	0	HEAT_repeat-containing_protein_6-like
LOC121408441	10.4209	9.04082	0	40.9763	5.51678	0	3.49618	10.7907	0	5.15426	7.77891	26.3697	0	21.4791	0	2-methoxy-6-polyprenyl-1,4-benzoquinol_methylase,_mitochondrial-like
LOC121408444	0	1.72935	2.11043	0	0	0	0	0	0	0	0	0	0	0	0	SEC14-like_protein_2
LOC121408445	10.8802	1.57322	30.7183	7.48694	4.31997	11.0565	5.47542	18.3079	0	0	4.0609	0	14.7675	4.80555	0	CUE_domain-containing_protein_1-like
LOC121408446	0	1.42857	0	0	0	3.76495	0	0	0.645885	0	0	0	0	0	1.23804	uncharacterized_LOC121408446
LOC121408449	0	0	0	3.14522	0	1.35472	0	0	0	3.95625	0	0	0	0	0	inositol_polyphosphate-4-phosphatase_type_I_A-like
LOC121408452	0	0	0	2.14216	1.44203	0	0	0	0	0	0	1.72319	0	1.60412	0	TRAF-type_zinc_finger_domain-containing_protein_1-like
LOC121408454	0	2.79118	6.81248	0	0	0	0	0	0	0	0	0	0	0	0	glutathione_hydrolase_1_proenzyme-like
LOC121408455	1291.57	675.872	889.922	330.514	450.409	1520.83	708.441	249.438	34.8463	288.991	2111.89	836.523	94.6075	476.89	25.6898	uncharacterized_LOC121408455
LOC121408461	0	0	0	0.422456	0	0	0	0	0	0	0	0	0	0	0	dynein_heavy_chain_10,_axonemal-like
LOC121408464	0	1.47235	0	0	1.34766	0	0	0	0	0	0	0	0	1.49914	0	leucine-rich_repeat_and_WD_repeat-containing_protein_1-like
LOC121408470	0	0	6.52555	0	0	0	0	0	0	0	0	0	0	0	0	uronyl_2-sulfotransferase-like
LOC121408472	0	4.88303	0	0	0	0	0	0	0	0	0	0	0	0	0	uronyl_2-sulfotransferase-like
LOC121408475	0	0	17.3528	0	0	0	0	0	0	0	0	0	0	0	0	RNA-binding_protein_Musashi_homolog_2-like
LOC121408482	0	4.11631	0	5.597	22.6063	18.0807	9.55092	0	0	0	3.54176	0	3.8639	0	0	malate_dehydrogenase,_mitochondrial-like
LOC121408483	6.05262	14.0028	0	1.58665	6.40848	0	5.41503	2.08915	4.22064	1.99579	0	12.7633	2.19069	2.37627	2.02254	serine/threonine/tyrosine-interacting-like_protein_1
LOC121408484	45.8928	27.5265	19.1955	0	1.79967	46.6363	11.4051	3.52012	0	0	64.2862	12.9034	1.84561	0	0	alpha-ketoglutarate-dependent_dioxygenase_alkB_homolog_4-like
LOC121408486	0	2.52046	0	0	0	0	0	0	0	0	0	0	0	0	0	glutathione_S-transferase_theta-1-like
LOC121408487	0	0	4.23982	0	0	3.05209	0	0	0	0	0	3.80005	0	0	0	serine/threonine-protein_kinase_Chk2-like
LOC121408488	0	0	0	4.62277	0	0	0	3.04341	0	0	2.92528	0	0	0	0	DNA-directed_RNA_polymerase_III_subunit_RPC9-like
LOC121408490	6.25126	3.61559	0	0	0	3.17626	0	0	0	3.09193	0	0	0	0	0	uncharacterized_protein_CG3556-like
LOC121408491	0	3.0603	0	0	0	5.3769	0	13.6974	0	0	0	0	0	0	7.95642	phosphatidylinositol_3,4,5-trisphosphate_3-phosphatase_TPTE2-like
LOC121408499	0	0	2.59337	0	0	0	0	3.80463	0	0	0	0	0	0	0	HEAT_repeat-containing_protein_6-like
LOC121408501	0	6.01294	0	6.13189	13.7593	0	6.97579	0	1.35929	0	0	0	2.82211	15.3059	0	2-methoxy-6-polyprenyl-1,4-benzoquinol_methylase,_mitochondrial-like
LOC121408505	0	10.5173	0	0	0	0	0	4.70738	0	0	0	0	0	0	0	SEC14-like_protein_2
LOC121408516	0	0	7.60552	0	0	0	3.61509	0	0	0	0	0	0	0	0	TRAF-type_zinc_finger_domain-containing_protein_1-like
LOC121408520	0	3.11392	0	6.35104	57.0042	2.73555	7.2251	0	0	29.2921	0	17.0297	0	6.34116	0	sphingomyelin_phosphodiesterase_4-like
LOC121408527	0	33.4606	8.16677	4.54967	0	5.87896	0	5.99057	0	5.72286	0	0	0	0	0	peptide_chain_release_factor_1-like
LOC121408529	282.192	360.85	282.472	66.9805	185.789	312.832	640.344	185.95	27.3702	231.44	358.485	329.773	140.392	595.843	284.948	2-oxo-4-hydroxy-4-carboxy-5-ureidoimidazoline_decarboxylase-like
LOC121408533	0	0	0	1.44303	0	1.86464	0	0	0	0	1.82629	6.96479	0	2.16118	0	mucin-5B-like
LOC121408534	0	0	174.71	0	0	0	0	207.02	0	0	0	0	31.0117	0	0	uncharacterized_LOC121408534
LOC121408535	3.96225	24.0626	18.1783	7.79005	3.1464	4.02643	2.65864	8.20575	0	3.91953	3.94361	2.50658	21.5115	2.33338	0.993014	clathrin_heavy_chain_1
LOC121408536	0	4.86699	0	0	0	0	0	0	0	0	0	0	0	0	0	corrinoid_adenosyltransferase-like
LOC121408538	0	0	0	1.85849	0	2.40149	0	0	0	2.33773	2.3521	0	0	0	2.36906	carbonic_anhydrase_1-like
LOC121408540	0	3.70915	0	0	0	0	4.3031	0	6.70793	0	0	0	0	0	0	palmitoyltransferase_ZDHHC5-like
LOC121408541	0	4.57627	0	0	0	0	0	0	0	0	0	0	1.07391	0	0	uncharacterized_LOC121408541
LOC121408543	0	29.8083	0	11.5802	0	7.4818	34.5815	0	13.4769	32.7742	14.6558	9.31531	0	13.0074	14.7615	uncharacterized_LOC121408543
LOC121408544	0	2.40713	0	0	0	0	0	4.30957	0	0	0	0	0	0	0	uncharacterized_LOC121408544
LOC121408547	1.21544	2.81194	0	0	0	1.23513	0	1.25858	0	0	0	0	0	0	0	myosin_heavy_chain,_striated_muscle-like
LOC121408548	21.9091	8.44783	0	0	0	7.42135	9.80059	7.56224	7.63888	0	21.8061	36.9602	7.9298	0	7.32112
LOC121408549	64.6015	88.5668	145.237	120.425	212.799	106.982	73.8509	79.2822	22.5241	66.2719	147.647	202.826	80.5378	47.9073	4.79715	uncharacterized_LOC121408549
LOC121408550	6.90588	21.9682	0	1.35774	1.82798	7.01776	2.3169	1.78775	1.80587	1.70786	1.71835	6.55316	5.62392	4.06689	3.46149	GTP-binding_nuclear_protein_Ran-like
LOC121408551	0	0	6.65366	0	0	0	0	0	0	0	0	0	0	0	0	neuronal_acetylcholine_receptor_subunit_alpha-3-like
LOC121408552	0	6.21043	7.57895	6.33329	0	0	0	0	0	0	0	0	0	0	0	neuronal_acetylcholine_receptor_subunit_alpha-3-like
LOC121408553	0	0	3.58647	1.998	0	0	0	5.26156	2.65744	0	0	0	5.5173	0	0	coiled-coil_domain-containing_protein_92-like
LOC121408554	6.96717	0	0	3.13095	2.10766	0	2.67139	0	0.52054	0	0	0	2.16146	1.17228	0	pre-mRNA-processing-splicing_factor_8
LOC121408556	0	0	0	4.39735	0	11.3643	0	0	0	0	0	0	0	0	0	MIT_domain-containing_protein_1-like
LOC121408557	6.64027	3.84059	0	0	0	3.37392	0	0	1.73641	0	3.30452	0	0	3.91048	0	adenosine_deaminase_domain-containing_protein_1-like
LOC121408559	0	3.84974	0	0	1.76186	0	0	0	0	0	0	4.21075	3.61367	0	0	squamous_cell_carcinoma_antigen_recognized_by_T-cells_3-like
LOC121408560	8.22863	0	34.848	0	0	2.78731	0	14.2011	0	0	0	0	5.95655	12.9223	0	zinc_finger_protein_271-like
LOC121408563	0	0	2.26845	0	0	0	0	0	0	0	1.59939	0	0	0	0	solute_carrier_family_43_member_3-like
LOC121408564	11.4498	54.8705	23.0902	9.00441	1.73185	8.3109	10.9753	1.69373	5.98815	8.09023	8.13995	8.27807	12.4324	11.5591	3.27946	large_neutral_amino_acids_transporter_small_subunit_4-like
LOC121408568	2.7244	47.2719	11.5377	2.14254	2.88457	0	18.2805	16.9265	0	24.2552	2.71158	0	5.91642	3.20881	0	FACT_complex_subunit_SSRP1-like
LOC121408569	21.212	4.67374	2.85182	1.58874	4.27794	9.23814	17.622	2.09189	1.58482	12.9897	4.02139	20.4481	1.09679	10.7073	3.03779	uncharacterized_LOC121408569
LOC121408570	0	21.7967	2.41817	6.73574	10.8823	8.70374	9.19529	0	0	0	6.81977	6.50202	0	2.01758	12.0207	uncharacterized_LOC121408570
LOC121408571	7.70849	2.97228	0	0	0	0	0	0	0	0	0	0	0	0	0	F-box/LRR-repeat_protein_21-like
LOC121408572	22.4097	8.64086	5.27247	4.4059	1.97727	0	2.50613	17.4038	0.976677	1.84734	3.71739	16.5395	6.08324	0	0	uncharacterized_LOC121408572
LOC121408573	16.0292	1.85419	74.6715	6.3029	0	3.25777	6.4533	56.4336	0	3.17128	0	2.02807	62.6575	0	0	zinc_finger_matrin-type_protein_5-like
LOC121408576	113.399	634.014	253.461	215.519	40.0221	268.885	253.634	58.712	69.1915	121.525	329.192	561.949	30.7829	244.864	142.1	uncharacterized_LOC121408576
LOC121408577	0	0	0	2.73516	29.4595	0	0	0	3.63789	6.88091	0	4.40042	0	28.6745	6.97312	clathrin_heavy_chain_1-like
LOC121408584	0	0	0	1.75741	0	0	2.9989	0	0	0	0	0	2.42645	0	0	uncharacterized_LOC121408584
LOC121408586	0	2.77549	0	0	0	0	0	0	0	0	0	0	0	0	0	nudC_domain-containing_protein_2-like
LOC121408587	0	1.66239	2.02871	0	1.5216	0	5.78576	1.48812	0	0	1.43035	0	0	3.38528	0	GATOR_complex_protein_DEPDC5-like
LOC121408591	0	2.80705	0	0	0	0	0	5.02557	0	0	0	3.07029	0	0	0	protein_C12orf4_homolog
LOC121408595	0	0	51.9668	0	0	11.2227	0	15.2477	0	0	3.66395	0	15.9888	0	0	uncharacterized_LOC121408595
LOC121408596	87.2337	14.4154	3641.55	0	0	278.604	0	425.84	0	0	173.647	0	405.944	0	0	uncharacterized_LOC121408596
LOC121408597	1.75486	0	0	1.38007	0	0	0	1.81715	0	0	0	0	0	0	0	uncharacterized_LOC121408597
LOC121408598	0	0	8.39108	2.33731	0	3.02021	3.98848	0	0	0	0	0	0	0	0	E3_ubiquitin-protein_ligase_RNF185-like
LOC121408599	0	1.20864	0	0	0.553141	0.530889	1.40218	0	0	0	0	0	0	0	0	probable_E3_ubiquitin-protein_ligase_HECTD4
LOC121408600	0	2.64576	0	0	0	1.16214	0	0	0	3.39385	1.13824	0	0	0	0	gem-associated_protein_5-like
LOC121408601	3.38972	13.7238	4.78512	3.99865	7.17802	3.44463	2.27448	0	0	0	0	4.28878	0	1.99622	0	mu-type_opioid_receptor-like
LOC121408602	1.20194	1.39035	0	1.89048	0	2.44282	6.45195	0	0.628606	4.75592	2.39257	1.52073	1.30509	2.8313	0	ataxin-2-like
LOC121408605	15.2638	8.82827	3.59122	10.0032	0	15.5111	13.6559	15.8056	1.33048	10.0662	27.8521	12.8749	44.1968	11.9852	0	TBC1_domain_family_member_10B-like
LOC121408609	2.453	0	0	5.78732	0	4.98548	0	0	0	2.42655	2.44146	3.10362	0	0	0	leucine-rich_repeat-containing_protein_74B-like
LOC121408610	0	3.85391	0	0	0	0	0	0	0	0	1.65799	0	0	0	0	synaptic_vesicle_2-related_protein-like
LOC121408611	0	0	0	13.0873	0	0	7.4442	0	0	0	0	0	0	0	0	melatonin_receptor_type_1B-B-like
LOC121408612	0	3.92541	1.5968	0	0	0	0	0	0	1.11896	0	0	1.22823	1.33228	1.13395	uncharacterized_protein_YMR196W-like
LOC121408613	3.68745	0	5.20541	0	1.95212	3.74718	2.47425	1.90916	2.89276	0	1.83505	0	0	0	0	origin_recognition_complex_subunit_6-like
LOC121408614	0	3.49337	8.52632	0	0	0	0	6.2543	0	2.98741	0	0	0	0	0	regulator_of_microtubule_dynamics_protein_1-like
LOC121408615	0	25.8534	23.6628	0	0	0	37.4917	17.3574	0	0	0	0	18.2011	0	0	regulator_of_microtubule_dynamics_protein_1-like
LOC121408616	0	7.05467	0	0	0	3.09873	2.04609	0	0	0	3.03499	0	0	0	0	UDP-glucuronosyltransferase_2C1-like
LOC121408618	0	0	7.40305	0	0	7.99378	3.51885	5.43036	0	0	0	0	0	0	0	UDP-glucuronosyltransferase_1-2-like
LOC121408620	1.59958	5.55098	0	1.25795	1.69363	0	2.14662	0	0	1.58234	0	0	0	0	0	uncharacterized_LOC121408620
LOC121408621	12.1295	2.80616	0	3.81557	7.70555	0	0	0	2.53745	0	0	0	0	0	7.29569	ecdysone-induced_protein_78C-like
LOC121408623	0	4.96857	0	0	0	0	3.8428	0	0.748798	0	1.42502	1.8115	3.10926	0	0	AP-1_complex_subunit_beta-1-like
LOC121408625	0	4.34083	1.76579	0	0	0	0	0	0	0	2.48996	0	0	0	1.25396	vascular_endothelial_growth_factor_receptor_2-like
LOC121408627	0	31.1283	6.33127	3.52712	0	4.55765	0	0	0	0	0	5.67456	0	0	4.4961	developmentally-regulated_GTP-binding_protein_1
LOC121408628	0	1.6765	0	1.13978	0	0	1.94496	0	0	0	0	9.16858	0	0	5.81159	serine/threonine-protein_phosphatase_with_EF-hands_pef-1-like
LOC121408635	5.40966	28.7852	0	9.35947	33.2207	31.8843	11.6155	7.84232	1.69753	1.07027	6.46106	13.689	1.17479	10.1944	4.33844	iron-sulfur_cluster_co-chaperone_protein_HscB-like
LOC121408636	0	1.99711	0	0	0	0	4.63381	0	0.902932	0	0	0	0	0	0	uncharacterized_LOC121408636
LOC121408637	1.85396	6.43373	5.2343	0	11.7777	9.41995	2.48799	3.83951	2.90882	3.66793	1.84524	2.34569	12.0784	6.5508	14.8684	uncharacterized_LOC121408637
LOC121408638	6.94647	8.03537	19.6121	0	3.67744	3.5295	9.32208	14.386	0	10.3074	6.91381	4.39445	0	12.2724	3.48183	uncharacterized_LOC121408638
LOC121408639	0	0	10.1076	0	0	0	0	0	0	0	3.56322	0	0	0	0	scoloptoxin_SSD14-like
LOC121408640	2.78228	1.07281	0	1.45871	0	0	1.24459	0.960342	0.485037	0	0.923065	0	0	0	0	mediator_of_RNA_polymerase_II_transcription_subunit_13-like
LOC121408643	133.774	167.639	90.7184	86.6379	197.183	100.623	269.284	56.3592	31.2088	75.8958	98.553	185.848	51.9783	123.576	30.2393	histone-lysine_N-methyltransferase_SETD1A-like
LOC121408645	13.1106	0	6.16921	0	0	0	0	4.5253	0	8.64615	13.0489	5.52931	18.981	10.2945	0	proteasome_maturation_protein-like
LOC121408647	15.3964	8.90493	3.6224	0	0	0	0	7.97141	9.39424	0	0	0	2.78629	0	2.57242	NADPH--cytochrome_P450_reductase-like
LOC121408649	0	0	14.2049	0	0	0	0	0	0	9.95411	0	0	2.73155	0	0
LOC121408650	985.163	1649.86	2387.04	555.051	568.247	836.759	552.51	1530.19	580.598	1367.27	1046.39	874.382	4127.17	727.371	1149.74	60S_ribosomal_protein_L6-like
LOC121408652	0	6.39822	0	0	0	0	0	0	0	0	0	0	0	0	0	ester_hydrolase_C11orf54-like
LOC121408653	0	0	7.30335	0	0	0	0	0	0	0	0	0	0	0	0	cytochrome_P450_2C30-like
LOC121408654	0	0	2.31025	0	0	0	0	3.38927	0.427953	2.42836	0	0	0	0	1.6406	ubinuclein-2-like
LOC121408655	2.99992	0	67.7577	0	0	3.04852	0	0	0	0	5.97163	3.7956	0	0	3.00735	cytochrome_P450_2J4-like
LOC121408658	0	2.06902	0	0	0	0	0	0	0.311815	0	0	0	0.647381	0	0	ubiquitin_carboxyl-terminal_hydrolase_32-like
LOC121408659	12.4337	18.6976	0	0.977822	1.31647	6.31757	5.00577	0	0.650275	3.6899	2.47505	11.0121	0	14.6445	3.73935	sodium-dependent_dopamine_transporter-like
LOC121408660	44.4628	19.2872	0	2.91389	0	48.9483	4.97238	1.91837	0	5.49792	31.3464	0	0	0	0	RING-type_E3_ubiquitin-protein_ligase_PPIL2-like
LOC121408662	0	0	0	5.3786	0	0	0	2.36067	0	0	2.26904	2.88443	2.47542	0	0	pescadillo-like
LOC121408668	279.503	398.813	280.4	46.8629	141.208	164.363	384.61	105.779	11.8724	110.877	169.455	267.472	53.9197	53.4742	9.95618	uncharacterized_LOC121408668
LOC121408671	0	0	21.7489	0	0	0	0	15.9535	2.68586	0	0	0	5.57631	0	0	carboxypeptidase_B-like
LOC121408672	0	10.7462	0	0	0	0	0	4.80984	2.42929	0	0	0	0	0	0	carboxypeptidase_B-like
LOC121408677	0	7.52508	22.9582	0	3.4439	0	0	6.73622	0	3.2176	0	0	0	0	0	pescadillo-like
LOC121408678	5.2347	0	2.4632	5.48895	0	3.54634	0	3.61366	1.82514	0	5.21009	8.83082	5.68396	0	0	titin-like
LOC121408679	0	2.69307	0	0	0	0	0	0	0	0	0	0	0	0	0	sodium/glucose_cotransporter_4-like
LOC121408680	0	0	0	3.56038	0	0	0	0	0	2.23923	0	2.86403	2.45791	0	0	mediator_of_RNA_polymerase_II_transcription_subunit_19-like
LOC121408684	23.9887	40.6987	9.03037	8.80386	20.3193	8.12579	38.6311	9.93606	1.67279	20.5661	19.1008	44.5153	0	7.53442	3.20642	uncharacterized_LOC121408684
LOC121408686	2.73896	22.1782	0	8.61599	8.7	13.9167	11.027	0	1.43246	0	16.3565	6.93086	0	0	5.49149	uncharacterized_LOC121408686
LOC121408688	0	10.1969	2.76529	0	0	0	0	0	0	0	4.87422	0	0	1.1536	0	tyrosine-protein_kinase_Tec-like
LOC121408691	0	0	19.8181	0	0	0	0	14.5372	0	0	0	0	11.4328	0	0	carboxypeptidase_B-like
LOC121408693	0	0	0	2.30082	0	0	0	0	4.59031	0	0	0	0	0	0	collagen_alpha-1(XXVI)_chain-like
LOC121408694	0	1.69472	0	0	0	0	0	0	0.766218	0	0	0	0	0	0	protein_strawberry_notch_homolog_1-like
LOC121408695	0	19.6328	0	4.44916	25.9569	1.91636	0	1.95274	1.97253	3.73096	0	0	2.04766	4.44224	0	transmembrane_emp24_domain-containing_protein_2-like
LOC121408696	0	3.93584	0	0	0	6.9152	0	10.5697	0	0	0	0	0	0	0	deoxynucleotidyltransferase_terminal-interacting_protein_1-like
LOC121408697	0	2.39545	0	0	6.57776	0	2.77904	0	2.16606	4.09701	0	5.24018	0	0	0	uncharacterized_LOC121408697
LOC121408698	29.8414	78.4527	76.5923	27.735	14.3618	44.1088	21.8437	47.7553	11.3504	26.836	24.3009	37.7563	126.664	3.19521	24.4761	RNA-binding_protein_cabeza-like
LOC121408699	1.10623	1.27964	3.12325	1.73995	0	1.12416	1.48455	2.29099	0	2.18861	1.10103	4.19893	0	0	5.54486	transmembrane_protein_131-like
LOC121408702	0	9.73043	0	8.82038	8.90638	0	0	2.90346	0	0	0	0	9.13374	6.60499	16.8653	ADP-ribose_pyrophosphatase,_mitochondrial-like
LOC121408704	1.10815	2.56372	1.56433	0	2.3466	1.1261	0	0	2.31822	2.1924	0	4.2062	4.81301	6.52592	0	snake_venom_5'-nucleotidase-like
LOC121408705	62.4618	65.0277	185.167	19.6486	13.2268	38.0842	25.1469	116.422	39.2005	74.146	80.8184	31.6115	264.507	95.6382	12.5233	cytochrome_c_oxidase_subunit_4_isoform_1,_mitochondrial-like
LOC121408706	2.01595	0	5.69167	0	0	4.09722	0	2.0875	1.05433	3.98843	0	0	4.37793	0	0	protein_SYS1_homolog
LOC121408709	3.09624	8.35705	11.6555	3.24662	57.9162	4.19519	8.31023	6.41226	1.61931	8.16761	5.13613	5.22328	1.12065	2.43118	2.06927	uncharacterized_LOC121408709
LOC121408712	0	2.88449	0	0	0	0	0	0	0	0	0	0	0	0	0	solute_carrier_family_43_member_3-like
LOC121408716	314.161	641.414	667.448	533.659	422.442	340.001	364.684	795.384	10.6797	4.6616	320.5	677.714	677.128	468.075	1.57469	hydroxysqualene_dehydroxylase-like
LOC121408717	34.902	20.1865	0	10.2929	0	13.3003	5.85475	0	0	0	13.0267	5.51989	0	10.2769	0	RUS_family_member_1-like
LOC121408720	0	0	5.33734	0	0	3.84215	0	3.91509	1.97739	0	3.76313	0	12.3162	0	0	trypsin-3-like
LOC121408723	147.046	170.097	293.179	58.4167	138.036	118.619	337.707	183.66	20.6135	118.468	182.566	172.622	187.649	105.344	36.4727	THO_complex_subunit_5_homolog
LOC121408724	25.5923	37.4984	33.719	25.4935	9.03231	22.5393	36.6341	5.30011	0.892305	11.8143	45.8494	36.6975	20.3783	32.1522	5.13112	sin3_histone_deacetylase_corepressor_complex_component_SDS3-like
LOC121408727	18.0066	83.3168	84.7303	18.8811	25.4203	36.5965	16.1097	6.21521	3.1391	23.7499	41.8177	22.7825	13.0346	14.1388	0	uncharacterized_LOC121408727
LOC121408729	6.98436	4.0396	0	0	7.395	3.54875	0	0	1.82639	0	3.47576	0	0	0	0	proline_dehydrogenase_1,_mitochondrial-like
LOC121408730	26.326	0	185.816	0	23.2281	71.3399	11.7764	81.781	0	26.0421	34.9362	33.3085	76.2276	20.6713	0	INO80_complex_subunit_B-like
LOC121408733	0	1.17306	0	0	2.14744	1.03052	0	0	1.06073	0	0	0	0	0	0	splicing_factor,_suppressor_of_white-apricot_homolog
LOC121408742	0	9.6077	0	0	0	4.22014	0	0	0	0	0	0	0	0	0	notchless_protein_homolog_1-like
LOC121408745	0	4.70467	0	0	0	0	0	0	0	0	0	0	0	0	0	acyl-CoA_dehydrogenase_family_member_10-like
LOC121408746	0	5.59642	0	1.90238	0	0	0	5.00974	0	0	0	0	0	0	0	phosphatidylinositol_transfer_protein_alpha_isoform-like
LOC121408747	8.39833	9.71483	21.34	0	0	10.2413	15.7787	10.4357	0	1.66156	8.35884	4.25034	5.47146	1.97832	1.68382	ras-like_protein_family_member_10A
LOC121408748	0	3.81585	0	0	3.4927	0	0	3.41583	0	0	0	0	0	0	0	dnaJ_homolog_subfamily_A_member_3,_mitochondrial-like
LOC121408752	0	0	6.29818	0	0	0	0	0	0	0	0	0	9.68891	0	0	SWI/SNF-related_matrix-associated_actin-dependent_regulator_of_chromatin_subfamily_B_member_1-like
LOC121408753	0	6.67035	0	1.51162	0	0	0	0	0	0	1.9131	0	0	0	0	NAD(+)_hydrolase_sarm1-like
LOC121408754	0	0	649.053	0	0	0	0	276.445	0	0	0	0	265.725	0	0	uncharacterized_LOC121408754
LOC121408756	0	0	0	2.83261	0	0	4.83367	0	0	0	3.58494	0	0	4.24231	0	chromatin_modification-related_protein_MEAF6-like
LOC121408757	0	0	0	1.71209	0	2.21231	0	0	0	0	6.50043	0	7.09166	2.56414	10.9122	fructose-bisphosphate_aldolase,_muscle_type-like
LOC121408758	0	0	6.7869	0	0	0	0	0	0	0	0	0	0	0	0	carboxypeptidase_B-like
LOC121408759	15.2558	14.1177	23.6895	5.99877	6.46108	1.55029	10.2365	7.8986	20.7445	37.7282	4.5552	13.5115	6.62602	53.9049	30.587	ATPase_MORC2A-like
LOC121408760	1.75928	10.1753	4.96701	5.5342	13.039	8.93892	4.72188	0	2.76028	12.1822	1.75101	0	0	16.5768	33.5092	transmembrane_protein_248-like
LOC121408761	6.19456	0	0	1.21789	0	0	0	1.6036	0	6.12777	0	1.95939	3.36309	0	4.65742	protocadherin-11_X-linked-like
LOC121408762	1.05707	6.11387	0	0	1.11922	0	5.67431	0	2.76421	5.22837	4.2084	6.68721	0	1.24503	3.17907	piwi-like_protein_1
LOC121408765	16.4584	0	97.5814	0	3.48522	20.0701	0	92.0299	0	6.51239	13.1048	0	110.8	3.87697	0	uncharacterized_protein_CXorf65_homolog
LOC121408766	0	0	7.89336	0	0	0	0	0	0	0	0	0	0	0	0	mitochondrial_sodium/calcium_exchanger_protein-like
LOC121408767	0	2.22401	2.71408	0	2.03566	0	0	0	0	3.80378	0	0	0	0	0	fibropellin-1-like
LOC121408768	2.01913	0	19.9522	0	0	0	2.70965	8.36318	0	0	0	0	4.38484	0	2.02413	membrane-associated_transporter_protein-like
LOC121408770	0	0	5.89909	0	0	0	0	2.16358	0	0	0	0	0	0	0	monocarboxylate_transporter_1-like
LOC121408774	42.2659	6.66701	13.5602	0	0	21.4753	0	13.9256	2.00953	3.80093	11.4729	0	0	4.52555	1.92594	vacuolar_protein_sorting-associated_protein_18_homolog
LOC121408776	615.785	98.9815	1294.21	115.36	339.746	1262.39	118.933	873.393	202.181	982.493	1344.4	114.063	944.05	338.342	358.438	UDP-glucuronosyltransferase_2A2-like
LOC121408778	0.864109	2.99869	0	2.71824	0	4.39054	9.277	16.106	4.51923	22.2246	0.860046	4.3732	11.2592	10.1775	33.7837	hepatocyte_nuclear_factor_1-alpha-like
LOC121408782	1.73016	2.50172	1.2212	0	0	0.879096	1.16093	2.23946	0.452432	0	2.15254	0.547265	2.81798	0.509449	0	helicase_domino-like
LOC121408785	0	0	2.39785	0	0	0	0	0	0	0	0	0	0	0	0	protein_HIRA-like
LOC121408786	0	5.40251	0	0	0	0	12.5352	4.83615	0	0	0	0	0	0	0	mediator_of_RNA_polymerase_II_transcription_subunit_31-like
LOC121408788	0	0	0	1.3092	0	0	0	0	0	3.29359	0	0	0	0	0	E3_ubiquitin-protein_ligase_ZNRF3-like
LOC121408790	0	1.75219	0	0	0	0	0	0	0	1.49842	1.50762	0	0	0	1.5185	replication_protein_A_70_kDa_DNA-binding_subunit-like
LOC121408794	3.72349	4.30717	0	1.95217	0	0	3.33125	1.28521	0	7.36668	0	0	5.39073	1.46185	1.24423	clustered_mitochondria_protein_homolog
LOC121408795	0	3.57487	4.36262	0	9.81637	0	0	0	3.23254	6.11421	0	0	0	0	3.09808	RNA_N6-adenosine-methyltransferase_mettl16-like
LOC121408796	1.21563	8.43714	3.43211	2.86802	14.1581	7.41195	3.26273	1.25878	0	0	1.20992	1.53806	1.31996	4.29534	6.09321	lissencephaly-1_homolog
LOC121408797	8.78034	32.5015	14.8738	6.9051	13.0152	23.1987	2.35662	9.09197	4.59206	15.6342	13.9825	26.662	7.62711	2.06831	7.04166	eukaryotic_translation_initiation_factor_3_subunit_C-like
LOC121408798	0	6.79098	0	1.53896	2.07195	0	5.25228	2.02636	0	1.9358	0	0	4.2497	2.30485	0	pre-rRNA_2'-O-ribose_RNA_methyltransferase_FTSJ3-like
LOC121408799	0	3.4353	0	0	0	0	0	0	0	0	0	0	16.1232	0	0	voltage-gated_hydrogen_channel_1-like
LOC121408800	10.7602	6.91497	1.68775	0.940237	1.26587	9.71958	4.81336	0	0	0	8.3297	12.1015	0	0	0	sodium-_and_chloride-dependent_glycine_transporter_1-like
LOC121408801	1025.24	1155.93	1355.68	602.155	357.258	909.967	452.814	1679.79	427.596	680.402	1472.5	361.236	3903.34	412.7	767.58	60S_acidic_ribosomal_protein_P2-like
LOC121408802	0	2.74633	0	0	0	0	0	0	0	0	0	0	0	0	7.14013	nucleoredoxin-like
LOC121408803	33.3477	50.4444	0	32.2776	65.1846	13.0338	123.929	5.3125	12.0743	10.1502	56.1692	61.6661	0	27.1918	23.144	vacuolar_protein_sorting-associated_protein_33A-like
LOC121408804	0	0	20.3798	0	0	0	0	2.49153	1.25839	0	0	3.04432	7.83791	0	0	bleomycin_hydrolase-like
LOC121408805	0	2.38005	0	4.85428	0	4.18171	0	0	1.07607	0	0	2.60325	0	0	0	plexin_domain-containing_protein_2-like
LOC121408810	0	10.5988	19.4016	0	0	0	0	0	0	0	0	0	0	0	4.59262	glutathione_S-transferase_theta-1-like
LOC121408812	0	58.5642	0	9.9538	0	38.5861	0	0	0	0	50.3899	0	0	0	12.6883	histone_H3,_embryonic
LOC121408813	13.707	15.8557	0	16.1694	0	34.8227	18.3947	21.2903	0	13.5593	75.0342	0	44.6502	8.07212	0	dynein_light_chain_2,_cytoplasmic-like
LOC121408814	0	14.9615	6.08612	0	4.56481	0	0	0	6.76439	4.26485	8.58212	0	32.7694	0	0	dynein_light_chain_LC6,_flagellar_outer_arm-like
LOC121408819	0	2.09552	0	0	0	0	2.43108	5.62754	0	1.79202	1.80303	0	0	0	0	uncharacterized_LOC121408819
LOC121408821	6.95066	2.68007	0	3.64412	2.4531	2.35442	0	0	0	2.29191	11.53	14.657	0	10.9154	0	BRCA1-associated_protein-like
LOC121408824	7.12359	2.06007	0	0	5.65681	3.6195	4.77989	0	6.51978	42.2807	0	4.5065	0	6.29266	24.9943	ankyrin_repeat_domain-containing_protein_13D-like
LOC121408825	18.0206	0	25.439	9.44794	0	6.10419	0	24.8803	0	0	17.9359	22.8003	0	14.1499	0	uncharacterized_LOC121408825
LOC121408827	0	0	76.5306	0	0	0	0	40.0981	0	0	0	9.79892	0	0	7.76393	structure-specific_endonuclease_subunit_slx1-like
LOC121408828	0	4.94553	0	0	0	0	11.4749	0	0	0	4.25524	0	0	0	4.28593	protein_nanos-like
LOC121408829	3.89298	0	2.74778	3.06155	0	0	0	0	0	0	0	2.46276	0	0	0	uncharacterized_LOC121408829
LOC121408831	0	0	0	1.27333	0	0	0	0	0	0	0	0	0	0	0	SMC5-SMC6_complex_localization_factor_protein_1-like
LOC121408832	1.03514	2.3948	0	0	0	0	0	2.14375	0	0	0	3.92907	0	0	0	rho_GTPase-activating_protein_26-like
LOC121408836	0	4.14898	0	0	0	0	0	0	1.87584	0	3.56987	0	0	0	0	cell_cycle_control_protein_50A-like
LOC121408837	0	6.40744	0	0	0	14.0722	3.71673	0	2.89694	0	2.75655	0	0	6.52404	5.55286	protein_unc-93_homolog_A-like
LOC121408838	2.21918	2.56705	0	8.72611	2.34965	0	0	0	2.32123	2.19525	0	0	4.81927	2.61376	0	glycine-rich_RNA-binding_protein_10-like
LOC121408843	2.91567	13.4909	8.23186	0	0	2.96291	0	0	1.52488	0	5.80392	0	12.6636	10.3023	0	actin-related_protein_2/3_complex_subunit_3-B-like
LOC121408845	0	3.12487	0	0	0	0	0	0	0	0	0	3.41791	0	0	0	uncharacterized_LOC121408845
LOC121408846	5.11505	5.91686	0	0	0	0	0	0	1.33757	2.52995	0	3.23586	0	0	5.12771	arylsulfatase_A-like
LOC121408849	0	0	0	3.39627	0	0	0	0	0	0	0	0	0	0	0	vacuolar_protein_sorting-associated_protein_37B-like
LOC121408850	0	0	5.57178	3.10401	0	0	0	0	0	1.95221	1.96421	0	0	0	0	ubiquitin_carboxyl-terminal_hydrolase_30-like
LOC121408851	0	1.8765	0	0	0	0	2.17699	0	0	0	1.61458	0	3.52287	1.91065	0	nuclear_cap-binding_protein_subunit_3-like
LOC121408856	1.1769	1.36139	0	5.55327	0	2.39193	0	0	0	1.16421	0	0	0	0	0	homeobox_protein_cut-like_1
LOC121408857	495.429	581.519	380.543	335.187	983.545	544.176	875.073	490.38	203.856	273.873	779.532	451.689	506.304	759.433	175.29	uncharacterized_LOC121408857
LOC121408859	0	0	4.74361	0	0	0	0	3.47958	0.585807	0	0	0	0	0	0	A-kinase_anchor_protein_10,_mitochondrial-like
LOC121408861	3.26511	3.77693	0	0	0	0	0	3.38099	0	0	0	12.3934	14.1813	0	0	E3_ubiquitin-protein_ligase_RNF25-like
LOC121408864	0	0	0	1.94902	0	1.25923	0	0	0.648073	0	0	0	1.34551	0	0	mitogen-activated_protein_kinase_7-like
LOC121408865	0	6.26001	2.54648	5.67453	1.90995	1.83312	0	3.73584	1.88685	7.13779	0	0	0	6.37392	7.23345	lysine-specific_demethylase_2A-like
LOC121408866	5.88269	3.40242	0	2.31316	12.4571	0	3.94725	0	3.07661	2.90963	0	0	0	6.92867	2.94863	piggyBac_transposable_element-derived_protein_5-like
LOC121408867	4.66133	4.31361	2.63208	0	1.97415	0	8.75762	0	0	0	0.927881	0	0	1.09803	1.86915	3-methyl-2-oxobutanoate_dehydrogenase_[lipoamide]_kinase,_mitochondrial-like
LOC121408868	0	0	0	17.0196	22.9141	0	7.26072	0	8.48884	0	10.77	0	0	12.7448	16.2714	uncharacterized_LOC121408868
LOC121408869	89.255	43.6811	552.45	29.6969	36.3472	55.816	73.7103	657.624	17.9537	37.3546	102.502	60.8076	503.213	113.212	20.6483	prostaglandin_reductase_1-like
LOC121408870	6.67199	0	14.1278	0	0	0	0	0	0	0	0	4.22081	7.2446	7.85831	3.34425	DNA_ligase_1-like
LOC121408871	3.88609	0	5.48582	6.11225	0	0	0	4.02401	0	0	0	4.91681	21.098	22.8853	19.4785	prostaglandin_reductase_1-like
LOC121408872	0.794704	0.459639	0	0.312488	0.420714	0.403789	0.533241	0	0.623437	1.1792	0	0	0	0.468003	0.398336	uncharacterized_LOC121408872
LOC121408873	0	0	0	3.08027	4.14708	5.97037	7.88444	0	0	0	1.94919	0	0	0	0	uncharacterized_LOC121408873
LOC121408876	0	4.2179	0	0	0	0	0	0	0	0	0	0	0	0	0	protein_phosphatase_1E-like
LOC121408877	0	2.70043	19.773	0	2.47174	0	3.13285	0	0	6.92795	0	5.90734	0	0	11.7013	nucleoporin_GLE1-like
LOC121408879	13.0808	5.04377	0	17.1452	4.61663	26.5854	5.85143	4.51502	2.28039	0	0	0	0	10.2711	0	UPF0390_protein_UM03986-like
LOC121408880	21.1881	4.90189	29.9103	0	0	4.30626	5.68683	0	0	0	0	10.7231	4.6013	9.98217	8.49621	G_patch_domain-containing_protein_3-like
LOC121408881	0	0	0	7.02009	0	0	0	0	1.55618	0	0	0	3.23089	7.00917	0	3-oxoacyl-[acyl-carrier-protein]_reductase_FabG-like
LOC121408883	0	6.63466	0	0	0	0	0	0	0	0	0	3.62842	0	3.37769	0	mitochondrial_fission_process_protein_1-like
LOC121408885	0	0	0	0.595619	6.41522	0	0	0	0.792202	1.49842	2.26144	0	0	0	0.759248	trithorax_group_protein_osa-like
LOC121408888	0	0	4.17615	0	0	0	0	0	0	0	0	0	0	0	0	zinc_finger_BED_domain-containing_protein_4-like
LOC121408889	4.70615	5.44387	0	5.55157	0	7.17359	9.4734	4.87318	0	2.32771	18.7361	0	0	5.54293	0	serine/arginine-rich_splicing_factor_1-like
LOC121408891	0	4.50551	0	0	0	11.8742	0	0	1.01852	7.70592	0	0	0	2.29375	11.7138	nuclear_pore_complex_protein_Nup88-like
LOC121408892	0	13.5889	0	9.23847	27.3637	0	6.30595	0	0	18.5932	7.01529	5.94528	10.2045	0	4.71059	elongation_factor_Tu,_mitochondrial-like
LOC121408893	0	0	0	2.10411	0	0	0	2.77049	0	0	1.33148	8.46294	0	0	0	AH_receptor-interacting_protein-like
LOC121408894	0	0	0	2.77893	10.4758	0	2.84525	0	0	0.699104	0	0.89417	0	0	0	CAP-Gly_domain-containing_linker_protein_1-like
LOC121408895	0	2.11296	0	0	0.967011	0	0	0	0	0	0	0	0	0	0	uncharacterized_LOC121408895
LOC121408897	0	3.28787	0	0	0	0	0	0	0	0	0	0	0	0	0	neuronal_acetylcholine_receptor_subunit_alpha-10-like
LOC121408898	39.1979	83.1278	18.4447	5.13772	6.91709	139.415	70.1376	13.5297	0	0	65.0227	165.315	7.09367	23.0838	13.0983	uncharacterized_LOC121408898
LOC121408900	9.87506	0	34.8505	0	0	25.0876	0	0	0	9.76859	0	0	0	0	19.799	dehydrogenase/reductase_SDR_family_member_11-like
LOC121408902	56.353	21.7289	0	2.46209	19.8887	60.4474	54.6181	6.48368	0	21.6788	46.74	27.7277	0	14.7495	6.27695	uncharacterized_LOC121408902
LOC121408906	0	0.915821	3.35289	0	0	0	0	0	0.414061	0.783178	0	1.0017	1.71932	0	0	active_breakpoint_cluster_region-related_protein-like
LOC121408907	2.46204	5.69596	1.73778	1.93622	0	1.25096	4.95604	2.54942	0.643815	3.65324	2.45046	7.78764	4.01001	1.4499	0	transcription_elongation_factor_SPT6-like
LOC121408908	0	1.36473	0	0	0	0	0	4.88665	0	0	0	1.49271	2.56209	0	0	titin_homolog
LOC121408910	2.66394	2.31114	0	1.0475	9.16682	2.03032	0.893743	0.689621	1.74153	2.63522	1.32571	5.05575	1.44628	1.5688	6.67633	dentin_sialophosphoprotein-like
LOC121408911	6.22257	11.9967	20.4963	13.0496	0	10.539	2.78354	21.4781	0	12.311	8.25774	0	13.5132	2.44299	6.23797	major_vault_protein
LOC121408912	7579.27	15083	2320.7	12967	18598.6	7273.13	27057.3	1659.89	797.303	2147.3	7493.8	22020.5	1005.55	18870.8	1259.12	unconventional_myosin-XIX-like
LOC121408913	0	7.68339	3.1255	13.9296	2.34423	0	8.91374	4.58529	2.31588	2.19019	2.20365	5.60261	9.61632	15.6464	0	lysosomal_aspartic_protease-like
LOC121408914	9.06525	18.351	35.1918	26.7343	38.3929	32.2424	36.4964	11.7337	4.74106	51.5632	18.0452	28.6741	2.46081	26.6927	38.6227	G-protein_coupled_receptor_GRL101-like
LOC121408916	0	2.74548	0	0	0	0	0	0	0	0	0	0	0	0	0	E3_ubiquitin-protein_ligase_Midline-1-like
LOC121408919	0	20.572	0	2.7972	7.53194	3.61447	0	0	0	0	17.7006	0	0	0	0	uncharacterized_LOC121408919
LOC121408925	0	20.9109	17.0125	0	31.9	0	16.1729	0	9.45423	0	0	15.2479	0	0	0	uncharacterized_LOC121408925
LOC121408926	8.82472	18.3745	114.609	27.76	33.6368	14.3483	45.0021	9.13792	0.923053	15.7132	15.8098	22.3306	11.4985	2.07876	5.30794	uncharacterized_LOC121408926
LOC121408927	1.45068	3.35616	0	1.14085	0	0	0	0	0	2.87008	0	0	0	0	2.90854	carboxypeptidase_D-like
LOC121408931	0	21.4492	8.72524	0	0	0	0	0	0	0	0	0	0	0	6.19615	transforming_growth_factor-beta-induced_protein_ig-h3-like
LOC121408938	0	3.97634	0	6.75834	1.8198	0	4.61308	1.77975	5.39335	5.10065	0	0	3.73251	0	5.169	phosphorylase_b_kinase_gamma_catalytic_chain,_skeletal_muscle/heart_isoform-like
LOC121408939	444.6	288.266	435.738	111.352	167.907	356.837	330.626	284.438	28.1397	112.053	386.138	240.057	212.167	126.744	65.2937	DNA_repair_protein_RAD51_homolog_4-like
LOC121408942	0	5.65493	3.94345	0.549219	1.47886	0.709686	0.937208	2.16948	0	0.690843	0	0.883604	0.758309	1.64509	1.4002	nuclear_receptor_corepressor_1-like
LOC121408944	0	4.68236	11.4283	0	0	0	0	0	0	0	0	0	0	0	0	ion_channel_TACAN-like
LOC121408945	0.963239	5.57117	1.35976	0	2.03974	0	1.29266	1.99485	3.0226	3.81142	0	6.09361	0	5.67254	0	oxysterol-binding_protein_1-like
LOC121408946	0	0	5.6738	1.58042	2.12778	0	0	0	0	3.97592	0	5.08529	4.36419	0	0	uncharacterized_LOC121408946
LOC121408947	0	4.00682	0	0	0	0	9.29686	0	3.62313	0	0	0	0	0	3.47241	mitotic-spindle_organizing_protein_2B-like
LOC121408950	14.958	12.9771	36.9522	32.3493	21.7765	17.1003	27.601	85.1888	4.88933	29.5934	20.4705	11.8283	46.6949	15.4154	7.49751	transcription_factor_IIIA-like
LOC121408952	2.38522	0	0	11.2548	10.1018	0	6.40188	2.46988	0	0	0	0	2.58993	0	0	required_for_meiotic_nuclear_division_protein_1_homolog
LOC121408954	6.08298	7.03652	4.29354	0	3.22031	12.363	8.16328	6.29887	1.59068	3.00869	0	3.84819	9.90755	0	6.09803	tektin-1-like
LOC121408955	0	26.1057	4.55119	0	0	9.82869	4.32657	0	1.68613	3.18924	0	16.3165	0	3.79725	0	tricarboxylate_transport_protein_B,_mitochondrial-like
LOC121408958	0	2.18035	1.33041	0	0	0	2.52949	4.87946	0	0.932282	0.938011	0	1.02333	3.33004	0	cytospin-A-like
LOC121408960	0	5.67143	13.8423	1.92788	0	0	0	7.61532	0	0	0	0	10.6473	0	0	uncharacterized_LOC121408960
LOC121408962	0	1.88766	0	0	0	0	0	0	0.853451	0	0	0	1.77191	0	1.6359	heat_shock_protein_sti1_homolog
LOC121408963	0.617588	0	1.74365	0	0	0.627593	3.31518	0.639507	0	0	2.45874	0	0.670591	0	0	tetratricopeptide_repeat_protein_28-like
LOC121408964	74.8545	49.198	31.2204	10.7032	34.224	69.152	98.1708	68.7031	1.77947	31.975	104.981	66.7264	9.23622	12.0224	0	conditioned_medium_factor_receptor_1-like
LOC121408969	0	7.2726	0	0	0	0	16.8743	6.51021	0	0	0	7.9546	0	0	0	uncharacterized_LOC121408969
LOC121408970	0	3.91072	11.9312	0	0	0	0	0	0	3.34432	0	0	0	0	0	mediator_of_RNA_polymerase_II_transcription_subunit_15-like
LOC121408971	0	9.70563	1.97406	0	0	5.68421	3.75327	7.24015	2.19406	0	1.39182	7.07719	9.11047	0	0	E3_ubiquitin-protein_ligase_TRIM33-like
LOC121408973	0	4.31414	5.26479	2.93299	1.31626	1.26331	0	6.43647	0.65017	1.22977	3.71198	3.1458	12.1488	1.46421	2.4925	PHD_finger_protein_12-like
LOC121408974	0	1.40976	0	0.958433	2.58074	3.71538	0	0	1.27476	0	0	3.08392	0	0	0	protein_phosphatase_1E-like
LOC121408975	4.91385	0	0	1.93219	0	0	0	0	0	2.43043	7.33611	0	2.66778	0	2.463	uncharacterized_LOC121408975
LOC121408977	1.06439	0	0	3.34827	0	3.24491	0	0	1.11334	0	0	0	1.15574	3.76095	0	kinase_suppressor_of_Ras_2-like
LOC121408978	3.17296	1.22345	2.98609	2.4953	1.11984	1.07479	1.41936	1.09519	0	0	0	4.01454	0	0	0	protein_unc-119_homolog_B-like
LOC121408980	2.77057	3.20488	0	2.17885	0	0	0	0	5.79596	0	0	3.50542	0	16.316	5.55486	rab5_GDP/GTP_exchange_factor-like
LOC121408981	0	4.60711	5.62233	1.56609	2.10847	0	0	0	0	0	0	0	2.1623	0	0	2',3'-cyclic-nucleotide_3'-phosphodiesterase-like
LOC121408982	0	0	0	2.17728	0	0	0	0	1.44795	0	0	0	6.01236	0	0	amyloid_protein-binding_protein_2-like
LOC121408983	0	0	0	9.83232	0	0	0	0	0	0	0	0	0	0	25.0669	uncharacterized_LOC121408983
LOC121408987	300.759	0	169.137	5.7689	9.06134	397.569	22.9699	54.4375	0	2.41883	649.797	1.54687	47.7908	0	0	uncharacterized_LOC121408987
LOC121408988	348.001	396.359	192.724	98.945	243.751	348.198	452.644	163.545	14.0002	129.755	452.939	284.503	101.734	107.199	75.1397	cubilin-like
LOC121408991	0	12.5436	0	0	0	0	0	0	0	0	0	0	0	25.5437	0	steroid_receptor_RNA_activator_1-like
LOC121408992	8.613	29.8894	36.4758	0	0	8.75253	0	8.91869	9.00908	0	8.5725	0	9.35219	0	0	28S_ribosomal_protein_S23,_mitochondrial-like
LOC121408994	10.0074	26.4596	44.399	8.99436	72.6565	15.9806	11.5112	19.2447	0.747683	4.24263	5.6916	21.7057	17.0755	37.044	7.16581	serine/threonine-protein_phosphatase_alpha-2_isoform
LOC121408995	0	0	1.2375	0	0	0	0	0	0	0	0	0	0.951866	0	0	uncharacterized_LOC121408995
LOC121408996	0	5.77461	0	0	3.52372	0	2.2331	0	3.48109	1.64608	4.9686	4.21075	5.4205	0	0	tigger_transposable_element-derived_protein_4-like
LOC121409000	0	0	3.05077	0	0	0	0	0	0	0	0	0	0	0	0	alpha-N-acetyl-neuraminyl-2,3-beta-galactosyl-1,3-N-acetyl-galactosaminide_alpha-2,6-sialyltransferase-like
LOC121409001	13.3035	7.69448	9.39002	10.4623	14.0857	0	0	6.88785	24.3518	72.3806	6.62049	16.8321	0	15.669	20.0047	lysophospholipase_D_GDPD1-like
LOC121409002	0	4.86078	0	0	1.48304	1.42338	0	4.35121	1.46511	0	0	0	0	0	0	uncharacterized_LOC121409002
LOC121409006	0	0	0	5.86598	0	0	0	0	0	0	0	0	0	0	22.4325	SH2B_adapter_protein_1-like
LOC121409007	207.265	581.002	385.928	176.999	1031.29	167.981	481.212	326.54	57.8567	1171.06	222.743	492.301	186.394	371.419	469.094	DNA-directed_RNA_polymerase_II_subunit_RPB11-a
LOC121409008	0	0	15.4421	0	0	14.8216	0	11.3272	1.907	0	14.5167	0	0	0	0	uncharacterized_LOC121409008
LOC121409009	0	0	0	1.07585	0	1.39018	1.83587	0	0.715465	0	0	1.73086	1.48543	0	1.37141	calcium/calmodulin-dependent_protein_kinase_kinase_2-like
LOC121409013	16.0863	11.1647	54.4999	2.53013	10.2192	9.80811	21.5876	53.303	8.413	15.9128	9.60637	48.8469	38.427	0	6.45043	39S_ribosomal_protein_L28,_mitochondrial-like
LOC121409015	0	6.93764	8.46641	0	0	6.09466	0	0	0	0	5.9693	7.58823	0	0	0	uncharacterized_LOC121409015
LOC121409016	10.6373	132.276	33.7865	12.5482	0	0	60.6694	8.26113	0	0	0	26.9173	0	0	0	external_NADH-ubiquinone_oxidoreductase_1,_mitochondrial-like
LOC121409018	3.21389	7.43537	0	1.26374	0	0	4.313	1.66398	0.84042	1.58962	3.19877	0	15.7037	0	0	RING_finger_and_transmembrane_domain-containing_protein_2-like
LOC121409019	0	4.87366	5.94761	0	0	0	0	4.36275	1.10174	0	0	0	11.437	7.44352	0	kelch-like_protein_5
LOC121409020	0	4.94141	0	0	0	0	0	0	2.79264	0	1.06292	0	0	0	0	MLX-interacting_protein-like
LOC121409021	0	0	4.98642	0	14.96	3.58954	0	0	0	3.49424	0	0	0	0	0	ribosomal_RNA_small_subunit_methyltransferase_NEP1-like
LOC121409022	57.8469	83.6435	51.0375	8.52983	34.452	95.5241	38.815	48.6688	7.56339	64.3761	53.9765	82.3386	19.6286	97.9404	47.117	TLC_domain-containing_protein_3A-like
LOC121409025	3.68038	2.12865	15.5863	2.89435	1.94838	3.74	7.40854	1.9055	0	10.9221	0	4.65654	1.99812	2.16739	1.84475	spartin-like
LOC121409026	0	10.2347	0	0	9.36794	0	7.91572	3.05392	4.62731	20.4222	0	0	0	3.47364	0	SEC14-like_protein_2
LOC121409027	0	0	15.2699	0	2.86325	0	0	5.60047	0	0	0	0	0	3.18509	0	SEC14-like_protein_2
LOC121409029	42.0672	5.12226	37.506	6.96479	2.34423	53.9983	5.94249	22.9264	1.15794	0	50.684	2.80131	21.6367	5.21547	0	ubiquitin_recognition_factor_in_ER-associated_degradation_protein_1-like
LOC121409031	0	4.62871	2.82434	0	2.11836	0	0	2.07174	1.04637	3.95831	0	0	0	0	6.01704	cell_division_control_protein_45_homolog
LOC121409033	3.53557	8.17959	0	2.78047	0	1.79642	4.7447	0	1.84908	1.74873	0	13.42	0	4.16422	5.31649	melatonin_receptor_type_1B-B-like
LOC121409034	4.48499	0	0	1.76356	9.49737	0	9.02821	0	0	0	2.23195	2.83728	0	0	0	G-protein_coupled_receptor_moody-like
LOC121409036	7.57174	8.75866	7.1258	3.96975	2.67231	5.1296	33.8706	0	0	49.934	2.51205	6.38668	5.48105	8.91804	10.1207	alpha-1A_adrenergic_receptor-like
LOC121409038	0	2.70784	0	0	0	0	0	3.63596	1.8364	3.47347	0	1.48089	0	0	5.86671	5-hydroxytryptamine_receptor_1F-like
LOC121409041	2.80907	6.49881	0	2.20913	0	8.56372	0	5.81753	0	2.77878	0	3.55412	0	0	0	G-protein_coupled_receptor_moody-like
LOC121409044	2.86672	23.2126	8.09364	9.01785	12.141	2.91316	3.8471	5.93692	1.49927	11.3432	8.5597	14.5083	9.33823	10.1293	5.74762	N-lysine_methyltransferase_setd6-like
LOC121409045	10.9821	3.62962	2.21472	3.70142	1.66112	1.59429	12.6325	3.24912	0	1.55196	3.123	19.85	0	0	0	uncharacterized_LOC121409045
LOC121409048	0	0	0	3.6522	0	0	0	0	0	1.53132	1.54073	0	3.36174	3.64652	0	fatty_acid-binding_protein,_heart-like
LOC121409049	0	10.8116	4.398	0	0	0	0	0	1.62938	15.4095	18.605	7.88364	0	0	0	coronin-6-like
LOC121409050	41.0845	36.5575	35.6906	17.3977	16.7308	67.4424	21.2057	52.3602	23.1397	96.9144	34.6003	23.9914	17.1579	29.7782	6.33634	DNA_repair_protein_RAD51_homolog_3-like
LOC121409051	27.3842	105.59	64.4286	64.6071	67.6532	37.1038	89.8316	28.3561	17.5044	78.257	12.1135	115.491	26.4306	46.5881	27.452	peroxisome_assembly_protein_12-like
LOC121409054	0	7.48074	0	0	0	6.57177	0	3.34826	1.6911	0	0	0	0	0	0	uncharacterized_LOC121409054
LOC121409055	0	2.39674	11.6995	0	2.19377	18.9497	16.6832	4.29098	2.16723	6.14884	16.4977	0	2.24977	2.44036	2.07708	THAP_domain-containing_protein_5-like
LOC121409056	0.711107	1.64515	0	0.559234	0	0.722626	0	0	0	1.40688	0	0	1.54427	0.837546	0	teneurin-3-like
LOC121409058	7.45179	8.61991	0	1.95343	0	2.52417	10.0002	0	0	0	7.41675	0	2.69711	5.85117	0	probable_thiopurine_S-methyltransferase
LOC121409059	0	6.0996	0	0	0	5.35845	0	0	0	0	0	0	0	0	0	probable_thiopurine_S-methyltransferase
LOC121409060	0	1.75358	0	0	0	1.5405	2.03438	0	0	0	0	0	0	0	0	integrator_complex_subunit_2-like
LOC121409061	0	2.19978	0	0	0	5.79747	0	1.96918	0	0	3.78548	0	6.19467	0	0	probable_ATP-dependent_RNA_helicase_DHX37
LOC121409063	0	2.13633	0	0	0	0	0	0	0.965877	0	0	0	0	0	0	zinc_finger_protein_629-like
LOC121409064	0	0	9.96827	0	7.47656	0	0	0	0	0	0	0	0	0	0	39S_ribosomal_protein_L44,_mitochondrial-like
LOC121409065	13.7643	7.96099	3.23842	4.20959	12.1447	6.99366	18.4716	0.791825	1.99963	0.756441	20.5494	11.6101	1.66063	10.8078	0	calcium-transporting_ATPase_sarcoplasmic/endoplasmic_reticulum_type-like
LOC121409066	2714.04	2258.44	2776.76	1069.88	1926.75	2536.02	1909.45	1148.18	223.905	279.765	2812.9	1349.87	758.185	1642.53	30.3067	ribonuclease_P/MRP_protein_subunit_POP5-like
LOC121409067	3.79304	0	2.67723	0	0	0	0	0	2.9756	0	1.8876	0	0	4.46746	0	dentin_sialophosphoprotein-like
LOC121409068	1.81971	0	10.2752	0	0	0	0	0	0	0	1.81115	2.30235	1.97588	0	0	uncharacterized_LOC121409068
LOC121409070	4.71337	16.3567	0	3.70672	49.9049	0	6.32529	4.88066	0	0	9.38242	0	0	5.55144	0	3_beta-hydroxysteroid_dehydrogenase_type_7-like
LOC121409071	84.7847	147.113	23.0167	43.5965	62.1481	59.648	144.413	10.1301	11.9382	19.3547	51.9298	90.7689	3.54081	7.68153	0	protein_ALP1-like
LOC121409072	122.598	195.391	223.063	79.2739	118.267	105.204	138.932	310.32	31.3465	194.042	100.329	179.244	171.576	89.8466	13.6557	reticulocyte-binding_protein_2_homolog_a-like
LOC121409073	5.64912	13.0693	0	0	0	0	15.1621	5.84961	0	0	0	21.4423	0	0	0	plancitoxin-1-like
LOC121409074	0	0	0	2.21723	0	0	0	2.91944	0	2.78898	0	0	3.06134	0	0	surfeit_locus_protein_2-like
LOC121409075	406.217	520.969	760.43	222.233	243.1	367.928	284.42	877.845	106.224	297.01	386.728	189.941	1841.03	135.213	274.433	40S_ribosomal_protein_S5
LOC121409076	0	12.4586	0	5.64669	0	0	0	11.1525	3.75519	0	14.2928	0	23.3892	0	0	prefoldin_subunit_6-like
LOC121409077	0	5.63368	3.43755	0	0	12.3728	0	0	0	4.81773	0	0	0	0	0	nuclear_speckle_splicing_regulatory_protein_1-like
LOC121409078	1.92142	1.11131	6.78096	4.53317	1.01719	5.85764	12.8926	2.98442	1.50733	2.85105	5.73715	1.21552	2.08632	2.26306	0.963088	E3_ubiquitin-protein_ligase_BRE1A-like
LOC121409079	33.4035	82.7993	56.136	16.262	53.8931	37.1774	104.596	204.24	12.4784	39.3373	55.4106	46.2882	101.902	44.9632	22.3241	ankyrin_repeat_domain-containing_protein_27-like
LOC121409082	2.30715	5.33761	3.2569	1.8144	0	0	3.09616	2.38903	1.20662	2.28227	0	0	0	2.71737	0	Golgi_SNAP_receptor_complex_member_1-like
LOC121409084	0	0	72.7884	0	0	0	0	0	0	0	0	0	0	0	0	uncharacterized_LOC121409084
LOC121409087	0	2.44219	0	0	0	0	0	0	0	0	0	0	0	0	0	uncharacterized_LOC121409087
LOC121409088	0	8.38804	5.1182	0	0	0	0	0	0	0	0	0	0	0	0	transmembrane_protein_45B-like
LOC121409091	0	0	6.41681	0.595795	0	0	0	3.13794	0	0	0	0	3.29047	0	0	uncharacterized_LOC121409091
LOC121409092	0	7.91373	48.2879	0	0	3.47607	0	3.54206	0	0	0	8.65586	3.71423	0	0	uncharacterized_LOC121409092
LOC121409094	0	2.45501	0	0	0	6.4701	0	4.39529	6.65975	0	4.22468	0	0	0	0	stromelysin-1-like
LOC121409096	0	9.5294	0	0	0	0	0	0	0.861688	0	0	0	0	0	3.30337	collagenase_3-like
LOC121409098	3.57173	10.3291	0	12.6401	3.78173	1.8148	9.58644	1.84925	0	0	1.77747	6.77861	5.8174	12.6204	0	E3_ubiquitin-protein_ligase_RNF34-like
LOC121409100	275.762	262.697	489.463	135.541	337.059	259.624	394.558	451.419	42.418	184.533	335.008	241.153	358.873	188.667	34.5555	guanine_nucleotide-binding_protein_subunit_beta-like_protein_1
LOC121409102	0	2.03413	0	6.91458	22.3424	1.78697	14.1592	0	6.43771	29.5718	0	20.024	0	22.7826	37.0195	5-hydroxytryptamine_receptor_1D-like
LOC121409103	0	1.95278	0	0	0	1.7155	0	1.74807	0	1.66995	0	0	0	3.97664	0	NAD-dependent_protein_lipoamidase_sirtuin-4,_mitochondrial-like
LOC121409104	0	2.39223	0	0	0	0	2.77529	0	0	0	2.05832	2.61656	0	0	0	NIF3-like_protein_1
LOC121409105	0	0	7.41064	0	0	0	0	10.8718	0	0	0	0	2.85007	1.54575	0	EF-hand_calcium-binding_domain-containing_protein_5-like
LOC121409110	0	0	0	5.79565	19.5072	0	0	0	0	7.29013	0	0	0	26.0398	3.69392	perlucin-like_protein
LOC121409111	141.154	93.3031	0	0	0	184.423	54.1219	0	0	39.8948	140.49	76.5396	0	0	0	uncharacterized_LOC121409111
LOC121409113	0	0	0	8.33949	0	0	0	0	2.77298	5.24497	0	0	0	0	0	uncharacterized_LOC121409113
LOC121409114	12.2533	28.3481	0	9.6363	0	24.9035	0	0	0	6.06058	6.09782	69.7646	0	14.432	0	2-oxoglutarate_and_iron-dependent_oxygenase_domain-containing_protein_2-like
LOC121409116	2.70616	9.39111	0	8.5128	0	0	0	0	2.83061	2.67699	0	6.84785	0	0	0	uncharacterized_LOC121409116
LOC121409117	0	0	6.01524	0	0	4.33015	5.71837	0	0	8.43035	0	0	0	15.0563	0	uncharacterized_LOC121409117
LOC121409118	0	0	2.47557	0	3.71353	0	0	0	1.83431	0	0	0	0	0	0	coiled-coil_domain-containing_protein_157-like
LOC121409119	5.26941	0	7.4386	0	0	0	0	0	0	0	0	0	0	0	0	uncharacterized_LOC121409119
LOC121409121	0	0	0	16.0477	0	0	0	0	0	0	0	0	0	0	0	thioredoxin_domain-containing_protein_17-like
LOC121409122	0	0	2.18043	0	1.6354	0	0	0	0	0	0	0	0	0	6.19366	BAI1-associated_protein_3-like
LOC121409124	7.87575	9.11033	0	3.09685	0	0	0	0	4.11896	0	0	4.98233	0	0	19.7381	serine/threonine-protein_kinase_NLK-like
LOC121409125	90.4219	78.0039	45.4329	33.7472	38.9443	66.9683	69.9277	28.5654	4.00763	27.2889	115.928	58.1719	23.2975	50.5421	3.07274	argininosuccinate_lyase-like
LOC121409126	0	14.363	4.38201	0	6.57333	0	16.663	0	0	15.3535	3.08956	0	3.37057	21.9366	3.11185	small_nuclear_ribonucleoprotein_Sm_D3-like
LOC121409129	3.02413	0	2.13451	0	0	0	0	0	0	0	9.02972	0	0	0	1.51581	uncharacterized_LOC121409129
LOC121409137	0	0	10.5449	0	7.90909	0	0	3.86751	0	14.7787	11.1522	0	0	4.39905	0	NADH-ubiquinone_oxidoreductase_subunit_8-like
LOC121409138	6.24448	4.81556	14.6918	8.18472	0	2.11521	5.58668	19.3983	1.08861	6.17716	6.21512	5.26715	0	7.35479	0	ran-specific_GTPase-activating_protein-like
LOC121409141	1.4687	3.39787	0	0	3.11011	1.4925	1.97098	0	0	0	0	0	0	0	0	alpha-N-acetylgalactosaminidase-like
LOC121409143	0	3.51409	4.28844	0	0	0	0	0	1.58879	0	0	0	0	0	0	phosphatidylserine_decarboxylase_proenzyme,_mitochondrial-like
LOC121409144	2.03788	4.71465	2.87678	0.801321	0	2.07089	4.10221	1.0551	3.19739	0	0	2.57839	3.31916	0	0	autism_susceptibility_gene_2_protein-like
LOC121409145	9.4306	7.2726	0	0	0	0	0	0	0	0	3.12875	0	0	0	0	uncharacterized_LOC121409145
LOC121409149	0	0	3.05506	0	0	0	0	0	0	0	0	0	0	0	0	alpha-amylase_A-like
LOC121409150	0	1.57685	0	0	0	0	0	0	1.42585	0	0	0	0	0	0	protein_ABHD15-like
LOC121409152	0	0	4.05287	0	0	0	0	0	0	0	5.715	0	0	0	0	low_density_lipoprotein_receptor_adapter_protein_1-like
LOC121409155	0	0	2.57796	0	0	5.56733	0	0	1.43263	7.22602	0	5.7764	2.97438	0	0	nitric_oxide_synthase,_brain-like
LOC121409156	0	0	3.88866	0	0	0	0	0	0	0	0	0	4.48664	0	0	DNA_excision_repair_protein_ERCC-6-like
LOC121409157	0	0	7.51072	0	0	0	21.4201	0	0	0	0	0	0	0	0	uncharacterized_LOC121409157
LOC121409160	3.28044	0	13.8926	0	0	0	0	3.39687	0	12.9803	3.26502	0	0	0	0	uncharacterized_LOC121409160
LOC121409163	0	5.28052	0	0	0	0	0	0	0	0	0	1.44393	0	0	0	vacuole_membrane_protein_1-like
LOC121409166	0	0	3.43864	0	0	2.47535	0	2.52234	0	0	0	0	0	0	0	switch-associated_protein_70-like
LOC121409169	0	2.1825	0	5.93513	5.993	5.75191	0	0	0	5.59919	5.6336	4.77433	0	0	0	transmembrane_protein_132E-like
LOC121409171	0	0.901148	0	0	0.824832	0	0	0	0.407427	3.85315	0	0	0.845889	0	0	phosphatidylinositol-glycan-specific_phospholipase_D-like
LOC121409172	0	4.94553	0	0	0	0	0	0	0	0	0	0	0	0	0	mitofusin-2-like
LOC121409173	23.906	34.5668	8.43677	4.70008	31.6394	27.33	12.0306	15.4716	0	5.91207	17.8452	22.685	6.48942	0	0	centromere_protein_S-like
LOC121409174	8.90759	10.3039	0	0	0	0	11.9539	0	0	0	0	0	0	5.24571	0	CD2_antigen_cytoplasmic_tail-binding_protein_2_homolog
LOC121409176	0	0	0	0.95269	0	0	0	0	0	0	0	0	0	0	0	nitric_oxide_synthase,_endothelial-like
LOC121409177	0	0	8.41387	0	0	3.02842	0	0	0	0	14.8306	0	0	0	0	uncharacterized_LOC121409177
LOC121409179	0	12.4353	0	0	0	0	0	7.42115	0	0	0	0	0	0	0	uncharacterized_LOC121409179
LOC121409185	335.075	297.622	287.185	150.578	525.828	291.86	176.655	198.267	65.7158	118.379	470.473	340.673	77.9641	211.422	53.9847	uncharacterized_LOC121409185
LOC121409190	6.58055	3.80605	0	0	0	0	0	1.70353	0	0	0	0	3.57266	0	0	serine/threonine-protein_phosphatase_4_catalytic_subunit
LOC121409191	2.35524	0	4.98719	0.926113	0	1.1967	0	4.87766	0	0	0	0	6.39343	4.16102	0	flotillin-2a-like
LOC121409194	0	9.68448	0	0	0	0	0	0	0	0	0	3.53089	0	0	0	cyclic_nucleotide-gated_channel_cone_photoreceptor_subunit_alpha-like
LOC121409195	0	0	0	1.44579	1.94652	0	0	0	0	0	0	0	0	0	0	cyclic_nucleotide-gated_cation_channel_alpha-3-like
LOC121409196	14.5991	8.44382	25.7612	11.4812	11.5931	7.41782	29.3878	26.4552	0	10.8313	3.63262	13.8535	7.92604	4.29874	0	origin_recognition_complex_subunit_2-like
LOC121409197	0	3.83066	0	0	0	0	0	0	1.73192	6.55169	0	4.18988	0	0	0	protein_rolling_stone-like
LOC121409198	0	4.14318	0	0	11.3769	0	0	0	0	0	0	0	0	0	0	uncharacterized_LOC121409198
LOC121409203	0	8.34733	0	0	0	0	3.228	0	0	0	2.39407	0	5.22364	0	0	vacuolar_protein_sorting-associated_protein_29
LOC121409205	0	0	12.8323	0	0	0	0	1.56882	0	0	0	0	0	0	0	zinc_finger_protein_678-like
LOC121409206	0	0	6.12393	0	0	0	0	0	0	0	0	0	0	0	0	uncharacterized_LOC121409206
LOC121409209	11.8379	0	16.7111	0	0	0	0	0	0	0	0	0	12.8539	0	0	intraflagellar_transport_protein_20_homolog
LOC121409210	379.82	233.822	717.969	62.8169	88.0245	455.548	304.078	476.012	12.7882	45.1515	553.26	200.062	313.295	38.3995	17.9758	sigma_intracellular_receptor_2-like
LOC121409212	0	2.25218	2.74847	0	0	0	0	0	1.01826	9.62996	0	0	0	0	1.9518	sodium/glucose_cotransporter_4-like
LOC121409214	0	0	4.83418	2.6931	0	0	0	3.54601	0	0	0	0	5.57755	0	0	uncharacterized_LOC121409214
LOC121409215	0	0	5.99363	0	0	0	5.69783	0	0	2.10002	0	0	6.9153	2.50037	0
LOC121409216	0	6.29846	0	4.28204	2.88253	2.76657	3.65352	2.81909	0	24.238	0	0	2.95611	0	0	aminoacyl_tRNA_synthase_complex-interacting_multifunctional_protein_1-like
LOC121409217	2.68629	0	3.79212	0	0	0	0	0	0	0	8.02098	0	0	0	0	ecdysone-induced_protein_78C-like
LOC121409219	0	0	0	3.23966	0	0	0	4.26567	4.3089	4.07505	0	2.60604	8.94601	0	8.25932	T-box_transcription_factor_TBX1-B-like
LOC121409223	0	0	42.9949	0	0	0	0	0	0	0	0	0	0	0	0	uncharacterized_LOC121409223
LOC121409225	0	0.67022	0	0	0	0.588782	0	0.59996	0	0	1.15334	0.733071	1.25824	0.682416	0	syntaxin-like
LOC121409226	8.50997	15.7503	0	6.69247	9.0103	1.72957	25.1246	0	0.890131	1.68364	10.1639	12.9205	5.54419	28.0646	35.8303	uncharacterized_LOC121409226
LOC121409227	7.75257	0	0	3.04842	4.10419	3.93908	0	12.0416	0	0	0	0	8.41792	0	0	uncharacterized_LOC121409227
LOC121409228	0	1.22513	5.98041	0	5.6069	4.30508	1.42132	0	0	1.04769	1.05413	1.34002	0	1.24743	1.06173	S-adenosyl-L-methionine-dependent_tRNA_4-demethylwyosine_synthase_TYW1-like
LOC121409229	0	0	9.70295	0	0	0	0	0	0.898691	0	0	0	0	0	0	malectin-A-like
LOC121409231	362.323	723.318	538.974	265.025	740.437	397.885	708.436	326.771	44.8261	348.781	455.62	502.786	230.551	252.376	85.9229	cell_cycle_checkpoint_protein_RAD1-like
LOC121409232	0	8.95879	0	12.1814	0	0	0	0	0	7.66125	0	0	0	0	38.8196	TLC_domain-containing_protein_3A-like
LOC121409237	0	4.0664	0	1.38228	0	5.35845	0	0	1.8385	1.73872	0	0	1.90852	0	0	breast_carcinoma-amplified_sequence_3-like
LOC121409238	1.97942	2.28971	0	1.03778	2.7944	7.37546	0.885454	0	0	0.652693	2.62682	5.00886	0.716434	6.217	1.98432	phenolphthiocerol/phthiocerol_polyketide_synthase_subunit_C-like
LOC121409239	2.60081	12.034	7.34291	6.13605	11.0149	10.5718	0	0	0	0	5.17716	3.29063	0	3.06325	0	14-3-3_family_protein_artA-like
LOC121409240	0	0	0	5.13991	1.73001	0	2.19273	0	0	1.61633	0	0	0	0	0	gametogenetin-binding_protein_2-like
LOC121409241	0	7.60233	0	0	0	10.0179	4.40985	3.40268	1.71858	0	3.2706	0	0	0	3.29419	selenoprotein_M-like
LOC121409242	0	0	1.9889	0	0	0	0	0	0	2.78744	0	0	0	0	11.2992	rabankyrin-5-like
LOC121409246	2.95435	5.1262	0	0	7.82013	0	3.96471	3.05921	0	0	2.94046	1.86897	3.2079	0	0	transcription_intermediary_factor_1-alpha-like
LOC121409247	0	2.8986	0	1.97063	0	0	0	5.18948	0	0	0	0	2.72086	0	2.51201	glutathione_S-transferase_C-terminal_domain-containing_protein-like
LOC121409250	0	6.90173	0	0	0	0	0	0	2.08027	0	0	0	0	0	0	protein_NipSnap_homolog_2-like
LOC121409251	2.64377	3.0582	0	0	2.79921	0	0	0	0	0	0	10.035	0	9.34154	0	RING_finger_protein_215-like
LOC121409253	0	4.7909	1.94887	0	0	0	1.85269	0	1.44404	0	0	0	8.99424	0	0	RING_finger_protein_10-like
LOC121409254	83.5995	26.5937	118.014	21.3671	92.9404	48.8484	19.6332	17.3133	3.27915	10.3373	93.6072	26.4432	40.8484	71.3864	20.9516	very_long-chain_acyl-CoA_synthetase-like
LOC121409255	721.287	1251.53	1265.05	395.349	289.278	621.915	263.989	973.216	400.09	616.213	1544.56	331.853	3251.42	450.511	832.629	60S_ribosomal_protein_L23a-like
LOC121409257	3.90122	1.50425	0	1.02267	0	0	0	1.34656	0	0	1.29429	1.64532	0	0	0	ABC_transporter_B_family_member_27-like
LOC121409258	2.36758	30.1258	0	9.30964	15.0407	4.81187	25.4181	2.45161	0	0	2.35645	11.9822	0	0	0	phosphoserine_phosphatase-like
LOC121409259	0	0	0	5.538	0	0	3.15008	0	0	0	0	0	0	0	0	putative_phospholipase_B-like_2
LOC121409260	3.61203	8.35649	0	0	0	0	0	0	0	0	0	0	0	0	0	protein_ANTAGONIST_OF_LIKE_HETEROCHROMATIN_PROTEIN_1-like
LOC121409261	0	6.40052	1.95273	0	2.92924	0	1.85636	2.86477	0.723451	0	5.50714	0	3.00402	0	9.70701	mitogen-activated_protein_kinase_3-like
LOC121409262	0	0	0	1.27414	0	0	0	0	0	0	0	0	0	0	0	phosphorylase_b_kinase_regulatory_subunit_alpha,_liver_isoform-like
LOC121409267	57.2868	58.9039	53.9129	40.0461	33.6972	38.8099	42.7101	72.5022	19.9737	56.6691	19.0058	64.4277	20.7344	22.4909	0	protein_GUCD1-like
LOC121409268	0	0	2.02947	0	0	0	0	0	0	0	0	0	0	0	0	bile_acid-CoA:amino_acid_N-acyltransferase-like
LOC121409269	14.3202	1.38042	13.4768	0.938484	16.4257	16.9776	11.2102	0	0	0	17.8161	1.50987	6.47884	5.62214	2.39261	fibropellin-1-like
LOC121409272	0	0	1.21941	0	0	0.877812	0	0	0	0	4.29878	0	0	0	1.73191	phosphatidylinositol_4-kinase_alpha-like
LOC121409273	0	4.33624	2.64588	0	3.96902	0	2.5153	0	0	1.8541	0	0	0	2.20757	0	5-hydroxytryptamine_receptor_4-like
LOC121409274	54.6307	33.2602	20.2947	13.5673	79.153	43.8282	42.4448	11.9094	1.50376	11.3772	31.4796	83.6722	12.4883	16.9327	0	uncharacterized_LOC121409274
LOC121409275	0	0	0	2.84864	0	0	19.4441	11.2524	0	0	3.60522	0	11.7994	4.26631	0	transport_and_Golgi_organization_protein_2_homolog
LOC121409276	0	6.00481	0	0	0	0	0	0	0	0	0	0	0	0	0	BET1_homolog
LOC121409277	0	2.29168	0	0	0	0	2.65864	0	0	0	1.97181	0	0	0	0	galactosylceramide_sulfotransferase-like
LOC121409280	21.8434	25.2674	37.6876	17.1782	15.4184	34.529	13.0282	6.28295	1.90399	3.60131	39.8579	13.8185	10.5413	14.2929	1.21652	uncharacterized_LOC121409280
LOC121409281	22.6464	13.0982	0	8.90488	11.9889	0	7.59781	0	0	0	0	28.653	0	0	0	uncharacterized_LOC121409281
LOC121409282	28.6696	16.9675	0.941202	1.04868	0	12.8732	8.05276	0	1.04609	1.31909	15.2628	9.27934	2.17187	1.57057	4.01032	uncharacterized_LOC121409282
LOC121409283	0	0	0	8.95769	0	0	0	0	0	0	0	0	0	0	0	branched-chain-amino-acid_aminotransferase-like_protein_2
LOC121409284	222.361	212.598	227.415	135.614	67.2669	251.326	164.428	474.603	122.227	134.672	239.382	175.119	611.002	435.606	86.435	myb-like_protein_X
LOC121409286	0	4.39087	0	0	0	0	0	0	0	0	1.25933	1.60088	0	1.49026	0	probable_phospholipid-transporting_ATPase_IA
LOC121409292	91.393	214.115	205.772	74.6033	251.102	75.2393	203.379	135.366	4.23526	44.6316	87.5089	193.21	108.03	89.9298	16.2363	replication_factor_C_subunit_2-like
LOC121409294	114.274	126.067	134.429	34.1166	98.5864	75.2662	117.855	66.8343	4.98037	71.1744	135.852	95.0499	59.7427	66.0499	8.48568	protein_spinster_homolog_1-like
LOC121409295	0	23.9062	18.2338	10.158	10.9408	5.25034	41.6014	24.0751	21.6169	48.5539	20.5694	9.80551	14.0251	12.1706	18.128	TBCC_domain-containing_protein_1-like
LOC121409296	0	12.2328	0	0	0	0	0	0	5.53069	0	0	6.68997	0	12.4554	5.30063	uncharacterized_LOC121409296
LOC121409297	25.2271	18.5701	35.612	12.625	29.1385	46.6105	18.4661	52.2449	0	0	41.0866	26.1149	39.8431	16.2069	0	thioredoxin-related_transmembrane_protein_2-like
LOC121409299	0	1.82525	0	0	0	1.60346	0	0	0	1.56089	3.14096	3.99282	0	0	0	uncharacterized_LOC121409299
LOC121409300	0	5.15943	15.7409	0	0	0	2.99281	73.897	0	0	2.21964	5.64327	60.5381	2.62666	0	apoptosis-inducing_factor_3-like
LOC121409301	0	38.8508	0	0	0	0	0	0	0	8.30597	58.4991	10.6235	54.7026	19.7789	0	cytochrome_c_oxidase_subunit_6A,_mitochondrial-like
LOC121409303	0	0	1.92569	2.14558	0	0	0	0	0.713432	0	0	0	1.48121	0	0	protein_yippee-like_2
LOC121409304	0	16.5342	0	11.2409	0	2.42085	3.19697	0	0	0	0	3.01412	0	0	0	gastrula_zinc_finger_protein_XlCGF52.1-like
LOC121409308	0	0	0	2.92306	0	7.55419	0	0	0	0	0	0	0	0	0	ketosamine-3-kinase-like
LOC121409309	0	0	0	2.15246	0	0.927118	0	0	0.954293	0	0	0	0	0	0	uncharacterized_LOC121409309
LOC121409310	4.06211	6.26516	3.82287	4.2594	1.43364	5.50388	0	0	1.4163	0	1.34767	0	2.94048	0	2.71477	ubiquitin-conjugating_enzyme_E2_L3-like
LOC121409311	0	3.93235	9.59776	0	3.59933	0	4.56205	24.6408	1.7779	6.72563	6.76696	4.30112	18.4561	8.00782	0	exosome_complex_component_RRP45-like
LOC121409312	497.573	480.679	246.79	126.91	438.548	333.445	568.479	158.747	12.6597	69.1752	460.433	386.235	91.9929	163.142	24.2662	uncharacterized_LOC121409312
LOC121409314	0	0	4.47236	0	3.35443	0	0	0	0	0	0	0	3.44006	0	0	kinesin-like_protein_KIF22
LOC121409317	8.26996	14.3495	17.5115	6.50372	0	0	5.5491	8.56348	8.65027	16.3616	16.4622	10.4634	4.48986	9.74041	8.29044	complement_receptor_type_2-like
LOC121409320	7.50029	23.136	7.05856	13.763	0	7.62179	10.0653	5.17766	6.53767	12.3657	9.95336	6.32641	5.42932	0	0	high_mobility_group_protein_1_homolog
LOC121409325	0	3.28059	0	1.11516	0	0	0	1.46834	0	0	0	1.79412	0	0	0	probable_RNA-binding_protein_19
LOC121409327	0	9.56119	0	0	0	0	0	0	0	0	0	0	0	0	0	3-galactosyl-N-acetylglucosaminide_4-alpha-L-fucosyltransferase_FUT3-like
LOC121409329	0	25.7598	0	0	0	0	0	0	0	11.0144	0	0	0	0	0	peptidyl-tRNA_hydrolase_2,_mitochondrial-like
LOC121409330	0	4.52732	5.52495	0	0	3.97721	0	0	12.2814	15.4864	0	4.95187	0	0	0	keratin-associated_protein_5-2-like
LOC121409331	0	7.8387	0	0	0	1.72156	0	0	0	0	0	0	1.8395	0	0	synergin_gamma-like
LOC121409333	0	11.0812	0	0	0	0	0	0	1.67001	0	0	0	0	0	0	histone_deacetylase_complex_subunit_SAP30L-like
LOC121409335	0	79.3493	0	17.982	0	0	0	0	11.9585	0	0	0	0	0	0	protein_PLANT_CADMIUM_RESISTANCE_3-like
LOC121409337	6.06856	7.01984	0	0	0	12.3337	8.14394	0	0	6.00313	6.04002	0	0	0	0	D(2)_dopamine_receptor-like
LOC121409344	0	0	2.73599	0	4.10419	3.93908	0	0	1.01364	1.91725	0	0	6.31344	0	0	uncharacterized_LOC121409344
LOC121409345	4.00667	0	0	4.72644	0	4.07158	10.7538	0	0	3.96347	1.99392	0	0	0	0	uncharacterized_LOC121409345
LOC121409358	0	0	16.0674	0	0	0	0	0	0	0	0	0	24.7175	0	0	uncharacterized_protein_C5orf49_homolog
LOC121409367	0	0	0	3.31611	0	0	0	0	0	0	4.19686	0	0	0	0	ras-related_protein_Rab-22A-like
LOC121409377	0	0	6.27632	0	9.41493	0	0	4.60386	0	0	0	0	9.65527	0	0	cystine/glutamate_transporter-like
LOC121409397	0	15.3756	0	0	0	0	0	0	0	0	0	0	0	7.82772	0	mitochondrial_import_inner_membrane_translocase_subunit_Tim10_B-like
LOC121409399	10.2029	35.4069	43.209	40.1193	0	72.5774	0	84.5203	37.3524	30.2787	30.4648	25.8181	55.3928	24.0341	51.1409	histone_H1-beta,_late_embryonic-like
LOC121409406	9.56592	0	5.78734	1.0747	0	1.3887	0	2.83012	0	0	0	0	0	0	0	serine/threonine-protein_phosphatase_with_EF-hands_2-like
LOC121409411	0	0	6.58499	0	0	0	0	0	0	0	0	0	0	5.49414	0	chloride_channel_protein_C-like
LOC121409412	0	0	4.19554	0	0	0	0	0	0	0	0	0	0	0	0	melatonin_receptor_type_1B-like
LOC121409432	0	160.128	0	0	0	0	123.847	0	0	0	68.8889	0	0	0	0	uncharacterized_LOC121409432
LOC121409435	5.21575	0	14.7257	0	0	0	0	0	0	10.319	0	0	0	0	0	delta-like_protein_4
LOC121409436	53.2603	46.2069	0	0	70.4896	13.5308	53.606	0	0	0	0	0	0	0	0	uncharacterized_LOC121409436
LOC121409452	0	10.8911	0	7.40436	0	0	25.2702	0	0	0	0	35.7372	0	0	0	cystine/glutamate_transporter-like
LOC121409455	4954.33	18168.8	8488.86	5590.23	9902.04	4797.45	11442.4	4479.6	1436.36	6534.55	6646.17	11219.5	3157.54	6934.63	2933.17	uncharacterized_LOC121409455
LOC121409464	4.02662	2.32891	25.5789	0	6.39504	6.13778	27.0184	25.0172	2.1059	1.9916	8.01538	2.54731	6.5583	0	0	uncharacterized_LOC121409464
LOC121409466	10.8438	0	0	8.52782	11.4813	0	14.5522	0	2.8356	16.0903	0	6.85994	0	19.1577	5.4353	uncharacterized_LOC121409466
LOC121409479	0	0	0	9.28104	0	0	0	0	0	0	0	0	0	0	0	uncharacterized_LOC121409479
LOC121409485	15.7112	63.6093	22.1789	0	0	0	0	8.13443	0	0	15.6374	0	17.0596	0	0	TLC_domain-containing_protein_2-like
LOC121409488	0	0	2.96001	0	0	0	0	0	0	2.07423	0	0	0	0	0	toll-like_receptor_3
LOC121409494	0	0	4.35212	0	0	0	0	0	0	0	0	0	0	0	0	uncharacterized_LOC121409494
LOC121409499	0	0	2.70934	0	0	0	0	0	0	0	1.91023	0	0	0	0	PDZ_domain-containing_protein_8-like
LOC121409501	0	0	0	5.27682	0	0	0	0	0	0	0	0	0	0	0	calcium-activated_chloride_channel_regulator_1-like
LOC121409502	0	6.99498	0	0	0	0	0	0	0	0	0	0	0	0	3.03102	toll-like_receptor_5
LOC121409505	0	3.19336	0	0	0	0	0	0	0	0	0	0	0	0	0	toll-like_receptor_Tollo
LOC121409512	160.058	264.498	64.5564	35.9641	217.888	69.7077	337.537	47.354	23.917	67.8568	182.064	202.511	111.725	175.052	0	gamma-aminobutyric_acid_receptor-associated_protein-like_2
LOC121409514	0	7.49336	0	0	0	0	0	0	0	3.20403	0	0	0	0	9.74091	fibropellin-1-like
LOC121409517	0	0	10.1029	0	0	0	0	0	0	0	0	0	0	0	0	adenosine_receptor_A2a-like
LOC121409529	0	0	0	3.36038	0	0	0	0	0	0	0	0	0	0	0	glutathione_hydrolase_1_proenzyme-like
LOC121409552	0	0	0	6.4482	0	0	0	0	0	0	0	0	4.45152	0	0	uncharacterized_LOC121409552
LOC121409555	0	0	14.0942	0	0	0	0	0	0	0	0	0	0	0	0	carboxypeptidase_B-like
LOC121409557	2.97783	3.44462	21.0184	0	3.15291	3.02607	0	12.3341	4.67215	0	0	3.76765	16.167	0	0	protein_dispatched_homolog_1-like
LOC121409566	8.91276	30.9297	0	0	0	0	0	0	0	0	44.3542	0	0	0	0	uncharacterized_LOC121409566
LOC121409569	35.9009	0	12.6699	0	0	9.12063	0	0	0	0	0	0	9.74551	0	0	uncharacterized_LOC121409569
LOC121409576	0	0	20.0347	0	0	4.80742	0	0	0	0	0	0	0	0	0	4-galactosyl-N-acetylglucosaminide_3-alpha-L-fucosyltransferase_9-like
LOC121409578	8.19061	0	23.1247	0	0	4.16165	0	12.722	0	0	0	0	13.3403	0	4.10545	tripartite_motif-containing_protein_45-like
LOC121409581	0	0	17.5398	0	0	0	0	0	0	0	8.24439	0	13.4914	0	0	uncharacterized_LOC121409581
LOC121409584	0	0	0	6.56022	0	0	0	0	0	0	0	0	0	0	0	monocarboxylate_transporter_13-like
LOC121409599	0	0	6.72379	11.2374	0	0	0	0	0	9.42339	0	0	0	0	0	carboxypeptidase_B-like
LOC121409600	3.59177	4.1548	5.07035	0	0	14.5998	0	0	0	0	0	0	0	0	10.802	uncharacterized_LOC121409600
LOC121409603	0	0	0	5.03917	20.3532	0	8.59902	0	0	0	0	0	0	0	0	branched-chain-amino-acid_aminotransferase-like_protein_2
LOC121409606	0	5.38614	0	0	0	0	0	0	0	0	0	0	0	0	0	protein_rolling_stone-like
LOC121409607	5.49753	3.17965	0	0	5.82075	0	0	0	0	0	10.9434	10.4335	0	29.1376	2.75557	4-galactosyl-N-acetylglucosaminide_3-alpha-L-fucosyltransferase_FUT6-like
LOC121409608	0	0	0	3.37351	0	0	0	0	0	0	0	0	0	0	0	monocarboxylate_transporter_1-like
LOC121409610	0	0	14.1493	0	0	0	0	0	0	0	0	0	0	0	0	short_coiled-coil_protein_B-like
LOC121409611	0	19.0099	0	0	4.35	0	0	0	0	0	0	5.19814	0	0	0	uncharacterized_LOC121409611
LOC121409619	0	16.3969	0	16.7213	0	0	0	7.33899	25.9468	0	0	0	0	0	21.315	glutamyl-tRNA(Gln)_amidotransferase_subunit_C,_mitochondrial-like
LOC121409620	0	15.1787	9.26172	5.15966	0	0	0	0	0	0	6.53003	0	0	0	0	probable_thiopurine_S-methyltransferase
LOC121409622	0	5.72255	0	3.89051	0	2.51361	0	0	0	2.44686	0	3.1296	0	2.91334	12.3983	neurotrypsin-like
LOC121409629	0	27.5998	0	0	0	0	0	0	4.15947	3.93373	0	5.03133	0	9.36733	0	G-protein_coupled_receptor_GRL101-like
LOC121409631	0	0	28.8956	0	0	0	0	28.261	0	0	0	0	0	0	0	uncharacterized_LOC121409631
LOC121409635	0	0	5.96725	0	0	0	8.50912	0	0	0	0	2.67415	0	0	0	slit_homolog_3_protein-like
LOC121409637	0	0	2.9131	1.62287	0	0	2.76933	0	0	0	0	0	0	0	8.27485	octopamine_receptor_beta-2R-like
LOC121409641	37.7301	27.2778	31.0695	13.5997	18.3097	27.1585	56.9626	24.4183	0	9.33083	31.2939	51.7155	17.0701	11.1097	3.15196	uncharacterized_LOC121409641
LOC121409646	61.1827	20.221	0	9.1649	3.08475	23.6853	0	0	0	0	14.4988	0	0	0	0	uncharacterized_LOC121409646
LOC121409648	0	13.3842	0	0	0	11.7579	15.5274	0	0	0	0	0	0	0	0	uncharacterized_LOC121409648
LOC121409649	0	0	27.5441	0	0	0	0	0	0	0	0	6.17176	0	0	0	uncharacterized_LOC121409649
LOC121409651	0	7.26666	0	0	0	0	0	0	0	0	0	0	6.82106	0	0	uncharacterized_LOC121409651
LOC121409654	0	9.20945	0	0	0	0	0	0	0	0	0	0	0	0	0	defense_protein_l(2)34Fc-like
LOC121409655	35.5685	7.48074	4.56459	0	0	6.57177	0	3.34826	1.6911	3.19864	3.21829	0	3.51101	0	0	SEC14-like_protein_2
LOC121409656	0	0	0	11.847	0	0	0	0	0	0	0	0	0	0	0	WSC_domain-containing_protein_1-like
LOC121409657	112.221	0	255.904	33.9436	0	131.583	23.169	214.53	0	0	42.9588	0	131.225	0	0	TBC1_domain_family_member_19-like
LOC121409658	11.0703	0	0	8.70599	0	0	0	11.4632	0	0	5.50913	0	0	0	0	SEC14-like_protein_3
LOC121409660	0	0	0	9.35288	0	12.0855	0	0	0	0	0	0	0	0	0	uncharacterized_LOC121409660
LOC121409661	0	4.41267	0	0	0	0	0	0	0	0	0	0	0	0	0	uncharacterized_LOC121409661
LOC121409664	0	0	0	7.99201	0	10.3271	0	0	0	0	10.1146	0	0	0	0	uncharacterized_LOC121409664
LOC121409666	0	0	0	12.0839	0	0	0	0	0	0	0	0	0	0	0	TBC1_domain_family_member_19-like
LOC121409668	0	0	8.75341	0	0	0	0	0	0	0	12.3433	0	0	0	12.4323	galanin_receptor_2a-like
LOC121409671	0	0	4.48902	0	0	0	0	0	0	0	0	0	0	0	0	uncharacterized_LOC121409671
LOC121409674	0	0	0	2.40908	0	0	0	0	0	0	0	0	1.66311	0	0	uncharacterized_LOC121409674
LOC121409678	0	9.56633	0	0	0	0	0	0	0	0	0	0	0	0	0	trypsin-like
LOC121409679	0	17.0251	0	0	0	0	0	0	0	0	0	0	0	0	0	coagulation_factor_IX-like
LOC121409688	0	0	0	3.32524	0	0	0	0	0	0	0	5.34977	0	0	0	5-hydroxytryptamine_receptor_1F-like
LOC121409689	0	0	0	9.68263	0	37.5349	16.5228	0	0	0	12.2543	15.5778	26.7377	0	0	uncharacterized_LOC121409689
LOC121409694	0	14.849	0	5.04758	0	6.52235	0	0	0	0	0	0	0	0	0	monocarboxylate_transporter_2-like
LOC121409696	0	1.37849	0	0	0	0	0	0	0	0	0	0	0	0	0	sal-like_protein_3
LOC121409697	3.61203	0	5.09895	0	0	3.67055	14.5419	0	0	3.57309	0	0	0	0	14.4839	coelenterazine_h_2-monooxygenase-like
LOC121409703	0	1.53597	0	0.696159	0	0	0	0	0	0	0	1.68001	0	0	0.887408	mucin-17-like
LOC121409705	6.72161	7.77526	9.4886	5.28605	7.11679	2.27683	9.02032	0	7.03071	0	0	5.6696	17.0298	2.63891	0	peptide_methionine_sulfoxide_reductase-like
LOC121409708	0	6.67201	0	0	0	0	0	0	0	0	0	0	0	0	0	G-protein_coupled_receptor_moody-like
LOC121409713	0	0	0	3.79759	0	0	0	0	5.05097	7.16527	2.4031	0	2.62167	0	0	ATP-dependent_DNA_helicase_DDX11-like
LOC121409715	0	0	12.1269	0	0	0	0	0	0	0	0	0	3.10926	0	0	uncharacterized_LOC121409715
LOC121409724	0	5.16793	0	0	0	0	0	0	0	0	0	0	0	0	0	ATP-dependent_DNA_helicase_Q4-like
LOC121409733	0	0	2.02228	0	0	0	0	0	0	0	1.42582	0	1.5555	1.68727	0	dentin_sialophosphoprotein-like
LOC121409737	0	0	0	1.18122	0	0	4.03137	0	0	0	0	0	0	0	0	DENN_domain-containing_protein_11-like
LOC121409738	0	0	2.77449	0	6.2429	1.99725	5.27512	0	0	0	0	2.4867	0	0	0	uncharacterized_LOC121409738
LOC121409742	38.607	0	81.7498	0	0	78.4649	51.8102	19.9886	0	19.0954	96.0637	0	209.602	0	0	uncharacterized_LOC121409742
LOC121409743	0	1.30857	0	0.444818	0	0	0	0	0	0	0	0	0	1.99857	0.567019	mucin-17-like
LOC121409745	6.81703	5.2571	0	8.93517	14.4357	0	18.2968	0	8.31894	2.24784	2.26166	5.75009	4.93473	8.02914	2.27797	peptide_methionine_sulfoxide_reductase-like
LOC121409753	0	0	0	3.76446	0	0	0	0	0	0	0	0	0	0	0	uncharacterized_LOC121409753
LOC121409758	11.6912	3.86397	0	0	5.30511	15.2751	2.24135	0	0	0	1.66232	8.45263	0	0	0	uncharacterized_protein_K02A2.6-like
LOC121409759	10.7212	0	3.02692	0	0	2.17897	0	0	1.12142	0	6.40246	0	0	2.52549	0	probable_RNA_polymerase_II_nuclear_localization_protein_SLC7A6OS
LOC121409784	0	0	8.70889	0	2.17733	0	8.27909	2.12941	1.0755	24.411	4.09351	0	4.46582	0	0	ankyrin_repeat_domain-containing_protein_10-like
LOC121409795	0	54.8588	0	0	0	0	0	0	0	0	0	0	0	0	0	U1_spliceosomal_RNA
LOC121409899	7.64584	10.3184	7.19554	0	0	6.47475	13.6808	13.1953	1.33291	1.26057	10.1465	1.6123	15.2204	4.50266	3.83238	disheveled-associated_activator_of_morphogenesis_1-A-like
LOC121409900	0	2.7211	0	0	0	0	3.15684	0	0	0	0	0	0	0	0	calmodulin-like_protein_4
LOC121409901	22.2609	0	74.6338	0	0	33.9323	0	14.4069	0	0	55.3906	3.52066	9.06427	0	0	methanethiol_oxidase-like
LOC121409902	0	3.62148	0	0	0	0	0	0	0	0	0	0	0	0	0	cholinesterase_1-like
LOC121409904	0	0	4.53786	0	10.2107	0	0	0	0	0	0	0	0	0	0	cholinesterase_1-like
LOC121409914	0	3.76812	0	3.84267	1.72451	1.65513	0	0	0	0	3.24218	0	0	0	0	septin-11-like
LOC121409916	0	0	2.38729	0	0	0	0	0	0	3.34579	0	0	0	0	0	fibropellin-1-like
LOC121409920	2.16234	7.5039	3.05248	8.50262	6.86842	0	5.80367	0	0	0	0	2.73586	4.69584	0	0	cholinesterase_1-like
LOC121409926	5.86921	13.5785	0	9.23141	0	0	0	0	0	11.6119	17.5248	0	0	0	5.88374	uncharacterized_LOC121409926
LOC121409934	8.66807	6.68456	0	13.6336	3.05923	8.80849	7.75496	0	25.6889	37.1566	2.87577	7.31142	0	30.6279	23.1721	aspartyl_aminopeptidase-like
LOC121409935	1.43202	6.626	0	12.388	15.1622	0	9.60878	2.96569	1.49788	0	0	19.9303	0	13.4931	0	condensin-2_complex_subunit_G2-like
LOC121409936	0	4.0599	0	0	0	0	0	1.21143	0	1.1573	3.49322	1.48021	2.54063	2.75585	0	putative_helicase_MOV-10
LOC121409939	15.3656	0	36.1516	0	0	15.6145	0	0	0	5.06664	0	0	0	12.0651	0	uncharacterized_LOC121409939
LOC121409941	54.8601	24.8321	87.545	0	10.1018	33.9341	25.6075	153.132	0	4.71901	54.6021	3.01786	103.597	0	0	probable_cysteine--tRNA_ligase,_mitochondrial
LOC121409945	0	6.45866	0	0	11.8234	0	0	0	5.84019	0	0	0	0	6.57619	0	peroxisome_assembly_protein_26-like
LOC121409946	0	2.63478	0	0	0	0	6.11338	0	0	0	2.26702	0	0	0	0	zinc_finger_protein_GIS2-like
LOC121409948	29.24	0	20.6384	0	0	14.8568	39.2397	0	0	0	50.9293	9.24884	23.812	0	0	U3_small_nucleolar_ribonucleoprotein_protein_IMP4-like
LOC121409957	2.26564	0	3.19831	0	0	0	0	0	0	0	0	0	0	0	0	dentin_sialophosphoprotein-like
LOC121409959	0	2.62855	9.62331	0	0	0	15.2473	2.35299	0	0	0	0	9.86945	5.35276	0	zinc_finger_protein_GIS2-like
LOC121409966	8.19061	9.47454	11.5623	0	0	0	0	25.4439	0	24.3069	16.3042	0	0	0	0	uncharacterized_LOC121409966
LOC121409969	9.37355	5.42146	1.65403	4.60726	6.20291	0	6.2896	0	0	1.15906	2.33237	7.41233	0	2.76005	0	putative_helicase_MOV-10
LOC121409971	0	0	0	9.93043	1.90995	5.49936	2.42081	0	1.88685	0	3.59083	6.84705	0	6.37392	0	condensin-2_complex_subunit_G2-like
LOC121409972	3.32733	7.69781	9.39409	13.0835	0	6.76246	17.8609	0	26.1025	6.5829	0	8.41969	0	19.5947	23.3489	aspartyl_aminopeptidase-like
LOC121409973	5.16317	0	7.28862	0	3.64449	0	0	7.12856	0	3.405	1.71296	0	5.60629	10.1354	8.62659	uncharacterized_LOC121409973
LOC121409974	0	2.23688	0	0	0	0	0	0	0	0	0	0	0	0	0	ATP-binding_cassette_sub-family_B_member_9-like
LOC121409989	0	0	3.65537	0	0	0	1.73748	0	0	1.28075	1.28862	1.63811	2.81165	1.52491	0	cytoplasmic_dynein_2_intermediate_chain_1-like
LOC121409998	2.83603	0	0	2.23033	12.0111	17.2918	15.2237	11.7467	0	5.6109	2.82269	0	9.23827	0	0	mesencephalic_astrocyte-derived_neurotrophic_factor_homolog
LOC121410000	0	8.17207	0	0	0	0	0	0	0	0	3.51571	0	0	0	0	protein_ATP6V1FNB-like
LOC121410002	0	3.82571	0	0	0	0	0	3.42465	0	0	0	0	7.18222	0	0	dual_specificity_tyrosine-phosphorylation-regulated_kinase_2-like
LOC121410003	6.71084	0	1.5789	0	3.5527	0	1.50098	1.15817	0	1.10641	2.22643	0	2.42893	0	0	glutamine--tRNA_ligase-like
LOC121410004	0	2.08129	2.53992	1.41498	0	1.8284	0	0	0.940995	1.77985	8.95394	0	3.90733	0	0	ras-related_protein_Rap-1b-like
LOC121410011	0	1.14658	0	0	1.04948	2.01452	2.66036	0	0.518391	0	1.97308	0	1.07627	2.33488	0.993655	cyclin-dependent_kinase_17-like
LOC121410013	65.716	62.196	0	61.0774	75.9051	97.1354	64.1382	0	3.12446	0	41.6226	37.7937	12.9738	14.0728	5.98897	uncharacterized_LOC121410013
LOC121410014	0	0	0	7.07489	0	0	0	0	0	0	0	0	0	0	0	RNA_exonuclease_4-like
LOC121410016	0	4.19402	20.4728	0	0	7.36881	0	0	0	0	0	4.58732	0	4.27034	0	leucine-rich_repeat_transmembrane_neuronal_protein_4-like
LOC121410017	6.01786	0	2.83172	0	0	0	5.38393	0	0	0	1.99652	0	0	0	0	chondroadherin-like
LOC121410018	1.28841	0	3.63759	0	0	5.23713	0	2.66828	0	0	1.28235	1.63014	0	0	0	UDP-glucuronosyltransferase_2C1-like
LOC121410020	0	1.79176	10.9329	4.87255	0	0	2.07867	3.20785	6.48072	4.59675	0	0	10.0913	1.82436	3.10557	S-adenosylmethionine_sensor_upstream_of_mTORC1-like
LOC121410021	0	6.43528	0	13.1252	0	0	0	0	0	5.50323	11.0741	0	12.0813	0	11.154	28S_ribosomal_protein_S25,_mitochondrial-like
LOC121410022	0	17.961	4.38378	0	6.57599	0	0	0	0	3.07193	0	0	0	0	0	uncharacterized_LOC121410022
LOC121410023	11.1345	38.6397	0	0	11.7891	11.3149	29.8847	0	0	0	44.3285	0	36.2702	0	0	28S_ribosomal_protein_S33,_mitochondrial-like
LOC121410024	0	3.07407	0	0	0	0	0	2.75181	0	0	0	0	11.5422	0	0	peptidyl-prolyl_cis-trans_isomerase_D-like
LOC121410030	0	0	0	5.68388	0	0	0	0	0	0	0	0	0	0	0	cysteine-rich_DPF_motif_domain-containing_protein_1-like
LOC121410032	4.1692	8.43981	114.767	0.819693	8.82865	0	2.79751	39.9339	0.545116	0	10.374	5.27501	14.7128	1.22763	0	uncharacterized_LOC121410032
LOC121410035	1.17654	1.36097	0	0	0	0	0	0	0	0	0	0	0	0	0	uncharacterized_LOC121410035
LOC121410036	4.03191	2.33197	0	0	2.13448	18.4375	13.5269	4.175	0	11.9653	0	2.55065	0	2.3744	0	proline-serine-threonine_phosphatase-interacting_protein_1-like
LOC121410037	65.6649	0	0	12.9102	0	25.0233	0	0	12.8784	0	0	10.3852	0	19.3351	16.4569	uncharacterized_LOC121410037
LOC121410038	312.499	359.985	382.566	87.6976	248.497	250.359	309.742	259.14	4.74706	10.2616	320.063	216.559	135.164	79.416	1.29988	uncharacterized_LOC121410038
LOC121410040	0	3.30868	16.1511	0	0	0	0	2.96183	0	0	0	0	0	3.36889	0	leucine-rich_repeat-containing_protein_71-like
LOC121410041	70.4365	33.1947	25.7787	2.0516	11.0486	113.994	45.512	43.2216	0	5.16126	83.0877	26.4055	39.6571	36.8713	7.84565	probable_cysteine--tRNA_ligase,_mitochondrial
LOC121410043	13.5023	0	85.7726	0	0	3.43025	0	83.889	0	0	23.5179	0	146.611	0	0	uncharacterized_LOC121410043
LOC121410044	0	4.32533	3.51897	0	1.31968	0	0	0	0	2.46592	0	0	1.35337	0	0	progranulin-like
LOC121410045	2.22819	0	3.14544	3.50462	4.71838	2.26429	2.9902	0	0	2.20417	2.21771	2.81918	0	0	0	cilia-_and_flagella-associated_protein_97-like
LOC121410048	0	4.2159	0	2.8662	0	0	14.673	0	0	0	0	4.61126	3.95738	0	0	immunoglobulin-binding_protein_1-like
LOC121410050	1.61471	0	9.11767	0	0	0	0	0	0	0	1.60712	0	0	0	0	sorting_nexin-4-like
LOC121410051	0	1.44178	0	0	0	0	0	0	0	0	0	1.57698	0	0	1.24948	TGF-beta_receptor_type-2-like
LOC121410052	0	0	0	4.49551	0	0	0	0	0	0	2.84474	0	0	0	0	cadherin-like_and_PC-esterase_domain-containing_protein_1
LOC121410056	0	6.0539	0	0	0	0	0	0	0	0	0	0	0	0	0	THAP_domain-containing_protein_5-like
LOC121410062	2.70426	9.3845	7.63497	6.38011	0	0	7.25816	0	1.41431	0	0	6.84303	0	0	0	telomeric_repeat-binding_factor_2-interacting_protein_1-like
LOC121410063	0	0	0	4.56514	0	0	0	0	0	0	0	0	0	0	0	sodium_channel_and_clathrin_linker_1-like
LOC121410067	0	1.77778	0	0	0	2.34265	3.09369	0	1.20566	2.28044	0	0.972247	0	1.81013	0	ectopic_P_granules_protein_5_homolog
LOC121410068	0	0	35.7347	0	0	25.7241	0	26.2124	0	0	62.9874	0	27.4865	29.815	0	histidine_triad_nucleotide-binding_protein_1-like
LOC121410069	0	0	0	1.89107	0	0	0	0	0	0	0	0	0	0	0	uncharacterized_LOC121410069
LOC121410072	0	3.75618	0	0	0	0	0	0	0	0	1.61595	0	0	0	1.6276	septin-11-like
LOC121410073	0	2.65922	0	0	0	0	0	0	0	0	0	0	0	0	0	amidase-like
LOC121410077	3.8802	0	334.128	0	0	0	0	273.218	2.02932	0	0	0	176.955	0	3.88981	uncharacterized_LOC121410077
LOC121410078	0	23.8645	0	12.9795	4.36869	0	33.2231	8.54508	2.15792	4.08161	20.5335	0	0	14.5792	0	uncharacterized_LOC121410078
LOC121410079	66.8375	203.46	253.26	2.76647	0	60.7708	75.5328	185.773	5.5193	17.3992	31.511	0	42.0163	4.14324	7.05295	protein_lin-37_homolog
LOC121410080	0	2.49148	0	0	4.56097	0	0	0	0	0	0	0	0	0	0	Bardet-Biedl_syndrome_7_protein_homolog
LOC121410082	0	0	5.2217	0	0	0	0	0	5.80363	0	0	0	0	0	0	carbohydrate_sulfotransferase_14-like
LOC121410083	1.11913	0	1.57982	0	1.18492	1.13725	4.50556	1.15884	1.75588	0	2.22773	0	0	0	1.1219	uncharacterized_LOC121410083
LOC121410085	0	2.55157	3.11383	0	0	0	2.96016	4.56817	1.15362	0	0	0	0	0	0	dual_serine/threonine_and_tyrosine_protein_kinase
LOC121410087	0	3.50854	0	0	0	0	0	0	0	0	0	0	3.29339	3.57238	0	uncharacterized_LOC121410087
LOC121410089	21.9508	30.4701	55.7767	37.978	32.538	66.9193	82.4818	45.4598	2.29603	4.34284	21.8476	5.55459	19.0678	5.17077	0	uncharacterized_LOC121410089
LOC121410090	0	5.3553	0	0	0	7.05687	0	0	0	2.28984	2.30391	0	0	0	0	aminomethyltransferase,_mitochondrial-like
LOC121410091	0	0	0	2.76141	0	0	0	7.27191	0	0	0	0	5.71903	0	0	calcium-activated_chloride_channel_regulator_1-like
LOC121410095	0	0	0	3.35478	0	0	0	0	0	0	0	0	4.63196	0	0	U6_snRNA-associated_Sm-like_protein_LSm8
LOC121410096	0	28.321	0	15.4033	10.369	0	39.4272	10.1408	0	0	48.7359	30.9768	15.9506	5.76727	4.90874	uncharacterized_protein_At5g50100,_chloroplastic-like
LOC121410097	0	5.63368	0	0	2.57829	0	0	0	1.27355	2.40886	0	0	5.28821	0	2.44115	rab_GDP_dissociation_inhibitor_alpha-like
LOC121410098	0	0	6.41364	0	0	0	0	4.7046	0	0	0	0	0	0	0	zinc_finger_CCHC-type_and_RNA-binding_motif-containing_protein_1-like
LOC121410100	4.46285	0	6.30001	3.50971	7.08786	2.26757	8.98364	4.62124	11.6702	0	6.6628	19.7629	0	28.91	0	thioredoxin-like_protein_4B
LOC121410101	290.843	144.186	90.6455	127.731	87.9837	310.908	233.171	27.3787	31.6071	29.8917	263.16	186.382	49.2163	329.211	26.5058	hemicentin-1-like
LOC121410102	0	4.61909	0	0	0	0	0	0	0	0	0	0	4.33584	0	0	E3_ubiquitin-protein_ligase_MARCHF4-like
LOC121410103	197.053	56.9856	869.82	76.2919	645.175	278.033	172.905	765.96	1.5855	225.667	386.218	39.3155	482.243	13.3898	16.715	uncharacterized_LOC121410103
LOC121410107	3.62111	1.39625	0	0.949247	5.11202	4.90637	3.23966	0	0	8.35817	8.40953	4.58155	3.93189	11.3732	1.21003	copine-8-like
LOC121410109	1.70805	5.92738	0	4.02976	0	0	6.87654	14.1493	0	1.68963	11.9001	10.8054	1.85464	0	0	histone_deacetylase_6-like
LOC121410111	7.79188	9.01331	5.49973	3.06387	0	7.91811	5.22831	8.06843	8.1502	3.85394	0	19.7171	16.9212	13.766	3.90559	protein_trapped_in_endoderm-1-like
LOC121410112	0	0	0	3.17497	0	0	0	0	0	0	0	0	0	0	0	uncharacterized_LOC121410112
LOC121410113	13.7438	19.8728	53.3543	40.5319	69.1214	31.4246	41.4991	17.7895	1.79698	37.388	58.1366	26.0837	37.3084	36.422	0	m7GpppX_diphosphatase-like
LOC121410115	0	1.83618	2.2408	0	5.04204	0	0	3.28739	0	1.57024	1.57989	2.00837	3.44717	1.86959	4.77385	serine/threonine-protein_kinase_TBK1-like
LOC121410116	0.834724	1.93114	2.35669	3.9387	0.8838	1.69649	0	1.7287	0.436555	0.825724	0.830798	5.2806	0.906362	2.94943	0	probable_E3_ubiquitin-protein_ligase_makorin-1
LOC121410118	0	0.918946	0	0	0	0	0	2.46783	2.07737	4.7151	1.58136	0	3.45038	0.935668	0	IQ_motif_and_SEC7_domain-containing_protein_1-like
LOC121410125	0	4.14705	0	0	22.7751	0	0	0	0	10.6392	0	0	0	0	0	cytosolic_Fe-S_cluster_assembly_factor_NUBP2_homolog
LOC121410126	0	0	0	4.24593	2.85822	0	0	0	0	0	0	3.41551	0	0	0	uncharacterized_LOC121410126
LOC121410128	3.79023	0	0	1.49037	4.01307	0	2.54322	0	0	0	0	0	0	0	0	epoxide_hydrolase_1-like
LOC121410132	0	0	0	1.253	0	0	0	0	0	0	0	0	0	0	0	IQ_and_ubiquitin-like_domain-containing_protein
LOC121410133	0	0	4.93874	1.37567	0	0	0	7.24542	0	22.4953	0	2.21324	3.7988	2.0603	5.2608	ankyrin_repeat_domain-containing_protein_10-like
LOC121410136	536.515	642.981	648.204	237.573	383.823	494.861	763.78	305.306	64.4607	203.208	594.126	431.14	202.059	425.543	72.6815	uncharacterized_LOC121410136
LOC121410137	0	0	0	2.99998	0	0	40.9542	0	1.99506	0	0	0	0	0	3.82414	heparan_sulfate_glucosamine_3-O-sulfotransferase_1-like
LOC121410141	0	0.724592	0	0	0	0	0	0	0	0	0	0	0	0	0	dynein_heavy_chain_12,_axonemal-like
LOC121410144	0	0	0	3.82281	0	0	0	0	0	0	0	0	0	0	0	uncharacterized_LOC121410144
LOC121410146	0	5.55445	0	3.77623	0	0	6.44389	0	2.51128	9.49995	0	12.1507	5.21385	5.65553	0	MTRF1L_release_factor_glutamine_methyltransferase-like
LOC121410147	0	16.5035	0	0	0	0	0	0	0	0	0	9.02556	0	0	0	protein_kish-B-like
LOC121410148	2.84759	4.94095	12.0595	2.23942	1.50751	1.44686	5.73215	14.7433	2.97854	0	0	3.60286	12.3679	0	2.85464	MAP_kinase-activated_protein_kinase_2-like
LOC121410150	0	0	0	4.5326	2.03413	0	0	0	2.00953	0	9.56073	0	0	0	0	alpha-aminoadipic_semialdehyde_synthase,_mitochondrial-like
LOC121410151	362.61	930.657	1039.76	222.786	551.898	391.514	501.825	375.479	47.4106	123.303	383.461	301.078	172.257	13.3464	11.3596	uncharacterized_LOC121410151
LOC121410152	0	6.37184	1.94398	11.9128	1.45806	2.7988	0	0	0	4.08673	0	17.4234	0	14.5975	1.3805	creatine_kinase,_flagellar
LOC121410153	2.48192	0	0	5.85556	0	0	1.66536	0	0	0	0	0	0	4.38484	0	creatine_kinase,_flagellar-like
LOC121410155	0	0	0	3.77151	0	0	0	0	0	0	0	0	0	0	0	centromere_protein_P-like
LOC121410156	3.056	0	6.47105	1.20166	1.61784	6.21102	2.05056	0	1.59827	0	0	3.86656	1.65914	0	0	nucleolar_protein_dao-5-like
LOC121410158	0	5.27269	0	0	0	0	6.11701	0	0	2.25451	0	2.88357	0	0	0	G2_and_S_phase-expressed_protein_1-like
LOC121410159	0	0	2.5435	0	0	3.66194	0	0	0	0	0	0	0	4.2443	0	protein_disulfide_isomerase_Creld2-like
LOC121410160	0	0	3.91816	0	2.93876	0	0	0	0	0	0	0	0	0	0	uncharacterized_LOC121410160
LOC121410163	0	2.0774	0	2.82467	0	1.82498	0	0	0	0	1.78744	0	0	0	0	rabenosyn-5-like
LOC121410165	379.103	633.433	648.919	155.55	397.514	308.94	587.4	180.16	33.5237	77.9019	382.789	412.456	171.019	181.193	12.8517	uncharacterized_LOC121410165
LOC121410166	1.95491	2.26135	5.51933	0	0	5.95974	0	8.09717	0	0	0	0	0	0	0	muskelin-like
LOC121410167	0	0	0	2.14863	0	2.77641	3.66651	0	0	2.70269	0	0	0	0	0	jasmonoyl--L-amino_acid_synthetase_JAR4-like
LOC121410168	0	0.727618	0	0	0	0	0	0	0	0	0	0	0	0	0	sodium-_and_chloride-dependent_GABA_transporter_1-like
LOC121410172	0	1.63637	0	0	0	0	1.8984	0	0	0	0	0	0	0	0	uncharacterized_LOC121410172
LOC121410173	2.31479	8.03295	0	0	0	0	9.31927	0	0	0	9.21563	0	2.51345	0	2.32052	26S_proteasome_complex_subunit_SEM1-like
LOC121410174	0	2.98877	0	0	0	0	0	1.33773	2.02693	0	1.2858	0	8.4165	1.52158	0	ceramide_synthase_1-like
LOC121410175	0	4.77289	40.7725	0	0	0	0	12.8176	0	0	0	0	17.9208	0	4.13631	uncharacterized_LOC121410175
LOC121410176	0	0	0	3.80596	0	0	3.24731	0	1.26553	0	0	3.06158	5.2549	0	0	HSPB1-associated_protein_1-like
LOC121410178	1.08239	8.76442	3.05592	0	2.29205	1.09992	0	2.24161	0	1.07072	4.3092	0	4.70113	0	0	heterogeneous_nuclear_ribonucleoprotein_A3-like
LOC121410179	11.9391	27.6212	8.42694	4.69461	6.32051	6.06624	8.01105	0	3.12203	11.8104	17.8244	0	12.9637	0	5.98432	nascent_polypeptide-associated_complex_subunit_alpha-like
LOC121410182	0	0	4.26065	0	0	0	0	4.68796	0	0	0	0	0	0	0	E3_ubiquitin-protein_ligase_CHFR-like
LOC121410183	2.78564	3.22231	0	0	8.84825	2.83077	0	0	0	0	5.54508	0	0	0	0	atrial_natriuretic_peptide_receptor_1-like
LOC121410185	0	0	3.0776	0	4.61663	0	0	0	0	0	0	0	0	0	0	atrial_natriuretic_peptide_receptor_3-like
LOC121410188	0	1.30731	22.3355	0.888785	0	3.44539	0	12.8729	0	0	1.12484	0	3.68144	1.3311	0	uncharacterized_LOC121410188
LOC121410193	0	10.0898	0	0	0	0	0	0	2.73709	0	0	0	3.78844	0	0	uncharacterized_LOC121410193
LOC121410196	0.667315	0	0.94202	0	0	0	0.895529	0	0	0	0	0	0	0	0	dedicator_of_cytokinesis_protein_3-like
LOC121410198	13.4168	1.94	82.8622	2.63783	5.32711	22.1555	4.5013	29.5226	6.13978	21.5672	28.3766	12.7315	16.3893	3.9506	20.175	UDP-glucuronosyltransferase_2B23-like
LOC121410199	0	1.63667	3.99465	0	0	0	1.89875	5.86038	0	1.39962	2.81645	1.79015	1.53631	1.66645	0	laminin_subunit_beta-1-like
LOC121410202	0	0	0	2.54827	3.43083	3.29281	0	0	0	0	6.45016	4.09976	0	0	0	5-aminolevulinate_synthase,_erythroid-specific,_mitochondrial-like
LOC121410205	2.29611	2.65604	0	0	0	0	0	0	0	0	0	0	0	0	0	protein_ABHD14B-like
LOC121410207	9.6075	0	9.04166	0	0	0	0	0	1.67488	3.16797	3.18744	4.05191	0	0	0	uncharacterized_LOC121410207
LOC121410209	0	0	0	3.04458	0	0	0	0	1.01236	0	1.9266	0	0	0	0	laminin_subunit_beta-1-like
LOC121410212	0	4.86344	0	19.8386	520.833	0	0	1.4512	0.732953	2.7727	4.18461	7.09269	10.6521	1.65065	0	ATP-binding_cassette_sub-family_C_member_9-like
LOC121410213	58.1479	16.8158	0	0	0	81.2486	19.5085	0	0	0	36.1716	45.9817	0	0	0	uncharacterized_LOC121410213
LOC121410214	91.1905	175.809	5.36374	44.8217	88.5059	77.2231	112.178	43.279	25.8332	60.1382	109.67	173.066	33.0056	89.5039	26.6631	uncharacterized_LOC121410214
LOC121410215	0	4.29953	0	0	0	0	2.49401	0	3.88781	0	0	0	0	0	0	uncharacterized_LOC121410215
LOC121410216	88.4875	120.422	404.133	65.4955	79.912	84.6315	115.257	245.24	74.862	136.449	160.601	135.007	327.808	214.573	57.3984	twinfilin-1-like
LOC121410219	202.97	256.527	514.682	135.974	183.066	286.47	287.516	206.282	23.5893	66.9273	389.067	118.891	114.276	128.384	33.9121	complex_I_assembly_factor_TIMMDC1,_mitochondrial-like
LOC121410220	8.84969	8.77452	8.92338	0.994234	1.33857	14.1319	35.6285	15.7093	1.98357	0	18.8745	9.59736	8.23645	2.97806	0	uncharacterized_LOC121410220
LOC121410221	0	3.80931	0	2.58978	6.97342	0	4.4193	3.40998	0	0	6.55522	0	3.57572	0	0	V-type_proton_ATPase_subunit_S1-like
LOC121410222	0	2.01659	0	0	0	0	0	3.61038	1.82349	1.72452	0	2.2057	0	0	0	ATP-binding_cassette_sub-family_D_member_2-like
LOC121410224	0	0	3.31058	0	0	0	0	0	0	0	0	0	0	0	0	protein_argonaute_18-like
LOC121410225	514.612	532.746	1116.83	203.579	485.428	565.207	712.926	686.819	69.0517	205.682	723.278	535.352	437.991	378.362	86.5021	NCK-interacting_protein_with_SH3_domain-like
LOC121410226	0	3.00139	0	0	0	5.27339	0	0	0	7.70006	0	22.98	0	0	0	ATP-dependent_DNA_helicase_DDX11-like
LOC121410228	0	17.1649	10.4737	0	15.7112	0	0	0	3.8803	7.33941	0	0	12.0842	0	0	uncharacterized_LOC121410228
LOC121410229	0.347654	0.40215	0	0	0	0	0	0	0	0	0	0	0	0	0	uncharacterized_LOC121410229
LOC121410231	0	4.196	0	2.85267	0	0	0	0	0	0	0	0	1.3129	0	0	glutamyl_aminopeptidase-like
LOC121410233	0	0	0	1.39957	0	0	0	0	0	0	0	0	0	0	0	divergent_protein_kinase_domain_2A-like
LOC121410236	0	51.3706	0	0	0	0	0	0	0	0	0	0	0	0	0	complexin-4-like
LOC121410237	0	1.80266	10.9995	2.4511	0	3.16724	2.09132	3.22737	0	1.54157	9.30629	3.94342	1.69212	11.0128	1.56224	U4/U6_small_nuclear_ribonucleoprotein_Prp3-like
LOC121410238	5.86921	10.1839	16.5706	0	0	2.98215	11.8146	3.03876	0	0	8.76242	0	6.37292	13.8256	2.94187	protein_KTI12_homolog
LOC121410242	0	0	0	1.86365	0	0	0	0	0	0	0	0	0	0	0	uncharacterized_LOC121410242
LOC121410243	82.6107	57.3363	0	0	0	92.3439	0	0	0	0	16.4444	0	0	0	0	uncharacterized_LOC121410243
LOC121410246	2.94304	0	0	1.15724	0	0	1.97476	0	0	0	2.9292	0	0	0	0	ankyrin_repeat,_bromo_and_BTB_domain-containing_protein_DDB_G0293800-like
LOC121410247	15.5491	16.1878	13.17	3.66846	4.93898	6.32039	10.4333	9.66056	0	1.53814	23.2139	7.86928	8.44177	1.83138	1.55876	MYCBP-associated_protein-like
LOC121410250	17.798	0	25.1246	0	6.28146	0	0	36.8593	0	0	0	0	0	0	0	anaphase-promoting_complex_subunit_15-like
LOC121410251	0	0	2.57154	0	1.92875	1.85116	0	0	0	0	0	0	0	0	1.82616	transcription_factor_12-like
LOC121410254	6.95276	8.04265	68.7044	5.46784	29.4461	14.1308	9.33052	35.9976	10.9087	41.2668	48.4404	26.3906	30.1978	16.378	20.9099	mediator_of_RNA_polymerase_II_transcription_subunit_20-like
LOC121410255	547.313	716.807	1037.14	312.238	512.703	565.607	741.958	924.072	76.6544	266.118	792.181	694.826	533.849	454.518	98.5743	succinate_dehydrogenase_assembly_factor_3,_mitochondrial-like
LOC121410256	0	1.91533	2.33739	1.30215	3.50625	3.3652	0	0	0.865959	1.63792	0	2.09494	0	0	4.97962	rho-related_protein_racA-like
LOC121410257	0	2.60467	0	0	0	6.86453	0	0	0	13.3645	2.24111	2.84892	0	5.30413	6.77182	BTB/POZ_domain-containing_protein_KCTD19-like
LOC121410258	0	4.1297	5.03972	0	0	3.62791	0	7.39356	1.86712	0	0	0	0	0	0	monocarboxylate_transporter_2-like
LOC121410261	0	0	5.15469	0	0	0	0	0	0	0	0	0	0	0	0	complex_III_assembly_factor_LYRM7-like
LOC121410262	23.0024	13.3041	81.1787	36.1794	48.7096	46.75	92.6068	23.8188	0	11.3772	11.4471	58.2067	24.9765	0	57.6483	uncharacterized_LOC121410262
LOC121410264	0	0	0	2.43431	0	0	0	0	0	0	0	3.91641	3.36106	0	0	uncharacterized_LOC121410264
LOC121410269	0	1.86118	0	3.796	1.70356	0	0	0	0	7.95808	1.6014	0	0	3.79009	3.22589	uncharacterized_LOC121410269
LOC121410270	0	3.6363	6.65639	0	0	0	0	0	0	0	0	0	5.11998	0	0	ubiquitin_carboxyl-terminal_hydrolase_calypso-like
LOC121410272	0	3.77121	0	0.366268	0	0.473282	2.50005	0.964533	0	0	3.24483	1.17853	0.505708	0.548548	0	dynein_heavy_chain_3,_axonemal-like
LOC121410274	3.03548	0	8.57011	0	0	3.08465	0	6.28643	0	0	6.04241	0	9.88797	10.7256	0	uncharacterized_LOC121410274
LOC121410277	72.8561	24.4675	39.8121	5.54478	7.46512	38.2123	50.463	9.73444	1.22914	9.29943	44.4438	47.5768	22.9671	2.76808	7.06805	uncharacterized_LOC121410277
LOC121410279	0	0	0	4.91216	0	0	0	0	0	9.26825	0	0	0	0	0	putative_nuclease_HARBI1
LOC121410282	0	2.76083	0	0	2.52703	0	0	0	0	0	0	0	0	0	4.78522	lysine-specific_demethylase_RSBN1L-like
LOC121410284	0	0	3.3977	0	0	0	3.23002	0	0	0	0	12.1811	0	0	12.0642	speckle_targeted_PIP5K1A-regulated_poly(A)_polymerase-like
LOC121410285	9.78389	45.2703	0	3.84716	25.8978	19.8848	16.4123	5.06557	0	0	29.2136	6.18945	0	2.88088	4.90405	nuclear_envelope_integral_membrane_protein_1-like
LOC121410286	4.15623	7.21162	2.93359	1.63429	0	2.11178	5.57761	8.60749	0	0	0	2.6293	6.7694	2.44762	10.4163	uncharacterized_LOC121410286
LOC121410287	0	0	3.97707	0	0	0	0	5.8346	0	0	5.60812	0	3.0591	6.63648	0	proteasome_subunit_alpha_type-2-like
LOC121410288	0	5.32163	0	0	0	0	0	0	1.20301	4.55087	0	2.91034	2.49765	0	0	39S_ribosomal_protein_L32,_mitochondrial-like
LOC121410290	0	4.82471	5.88788	1.64005	11.0403	0	8.39595	10.7973	0	6.18889	0	7.91574	4.52886	7.36876	0	protein_phosphatase_1H-like
LOC121410291	0	7.21357	0	0	0	0	0	0	0	0	0	0	0	0	0	WD_repeat-containing_protein_82-like
LOC121410293	0	3.85726	0	5.24476	0	0	4.47492	0	0	6.59719	0	0	0	0	20.0568	neurotrypsin-like
LOC121410297	0	16.7366	0	0	0	0	0	0	0	0	0	0	0	0	0	B-cell_receptor-associated_protein_31-like
LOC121410300	7.92449	27.5001	0	3.11602	0	16.1057	26.5864	16.4115	6.21668	19.5976	15.7745	10.0263	8.60459	9.33351	0	MICOS_complex_subunit_MIC19-like
LOC121410301	0	0	4.78195	0	0	0	13.6379	3.5077	1.77163	6.70191	3.37155	0	0	3.98979	0	mitochondrial_inner_membrane_protease_subunit_2-like
LOC121410302	0	3.03626	0	1.03211	1.38956	0	0	0	0	0	0	4.98148	0	0	0	ankyrin_repeat,_SAM_and_basic_leucine_zipper_domain-containing_protein_1-like
LOC121410304	0	0	0	7.05287	0	0	0	9.28654	1.56344	0	2.97536	0	6.49195	0	0	lengsin-like
LOC121410305	0	1.0754	0	0.731118	0	0	0	0	1.45863	1.83929	0	0	0	2.18994	0	uncharacterized_LOC121410305
LOC121410309	3.37705	0	81.0431	0	0	0	0	38.466	0	0	0	0	22.0013	0	0	uncharacterized_LOC121410309
LOC121410313	0	2.9933	0	0	0	2.62959	10.4179	1.33976	0	0	0	1.637	2.80975	0	0	V-type_proton_ATPase_116_kDa_subunit_a1-like
LOC121410316	0	3.07141	3.74822	0	1.40565	2.69821	0	2.74943	1.38865	10.5063	10.5708	3.35944	5.76613	6.2546	0	cyclin-T2-like
LOC121410317	7.5932	28.1071	25.7256	14.3316	16.0793	10.8027	24.456	37.7409	3.17695	0	33.253	23.0572	26.3836	35.7732	1.5224	KAT8_regulatory_NSL_complex_subunit_2-like
LOC121410318	0	12.275	0	0	0	0	21.361	10.9882	2.7749	5.24859	0	6.71307	5.76116	0	0	uncharacterized_LOC121410318
LOC121410320	5.97418	38.0087	16.867	0	0	6.07096	12.0259	0	20.309	14.7744	5.94609	11.3381	38.9214	14.0728	2.99449	heterogeneous_nuclear_ribonucleoprotein_A3-like
LOC121410322	3.37063	23.394	1.58606	9.71944	10.7064	2.28349	10.5545	5.8171	0	0	3.35478	4.26464	0	0	0	sorting_nexin-5-like
LOC121410326	0	0	0	0.716934	0	0	0	0	0	0.450902	0	0	0	0	0	uncharacterized_LOC121410326
LOC121410328	2.5738	2.97726	3.63332	0	0	2.6155	0	0	0	0	2.5617	3.25646	2.79469	0	0	uncharacterized_LOC121410328
LOC121410332	31.2485	38.1551	17.1547	0.68263	0	19.4057	29.1216	3.59529	0	0	12.959	9.88417	1.88502	0	6.96131	macrophage_mannose_receptor_1-like
LOC121410334	37.8902	0	0	8.76408	14.1593	20.3845	32.9018	0	1.16567	8.81922	33.2753	5.63999	0	2.62514	0	histidine_decarboxylase-like
LOC121410335	13.5023	31.2377	0	0	14.2961	13.721	0	0	0	13.3567	53.7551	34.1671	0	0	0	uncharacterized_LOC121410335
LOC121410336	0	0	0	1.95533	0	0	6.67328	0	0	0	0	0	0	0	0	histidine_decarboxylase-like
LOC121410337	0.963481	1.11451	0	1.51542	0	0	2.58596	0	0	0	8.63055	7.31417	0	0	0	uncharacterized_LOC121410337
LOC121410340	323.78	595.286	351.123	357.492	472.223	337.741	566.875	264.22	82.9851	307.562	505.794	415.083	211.872	441.961	111.776	39S_ribosomal_protein_L9,_mitochondrial-like
LOC121410341	70.2132	42.7471	15.65	17.4371	19.5635	26.2871	128.94	22.9595	3.86537	36.5559	62.5269	28.0535	24.0755	69.64	0	metaxin-2-like
LOC121410344	0	0	2.16261	0	0	3.11356	0	0	0	0	0	0	0	0	0	FYVE_and_coiled-coil_domain-containing_protein_1-like
LOC121410349	0	0	3.99759	0	7.99557	0.95924	0	3.9098	0.493679	0	0	0	5.1248	0	0	uncharacterized_LOC121410349
LOC121410350	0	1.53703	1.87573	0	0	2.70054	0	0	0	1.31442	0	5.04351	7.2139	0	0	calcium-independent_phospholipase_A2-gamma-like
LOC121410351	0	0	93.0542	5.18401	0	0	0	61.4322	0	3.26039	0	0	35.7879	0	0	uncharacterized_protein_KIAA1958-like
LOC121410352	0	3.59148	0	0	0	0	0	0	0	0	0	0	1.68562	0	0	nucleolar_protein_8-like
LOC121410353	0	3.5513	0	0	1.62527	0	2.05998	0	0	0	0	0	0	0	0	fibrillin-3-like
LOC121410354	364.709	332.835	419.893	40.554	94.1639	322.011	366.073	134.655	9.77152	62.1009	490.19	198.571	60.862	69.5388	35.2126	thrombospondin_type-1_domain-containing_protein_7A-like
LOC121410356	0	0	1.42236	0	0	0	0	1.04334	0	0	0	0	0	0	0	unconventional_myosin-Ia-like
LOC121410357	3.2335	1.24679	1.52153	0.847638	0	0	1.44644	0	0	0	0	2.72742	0	2.53896	0	dnaJ_homolog_subfamily_A_member_1-like
LOC121410359	0	1.38321	0	1.88077	0	0	0	0	0	1.18287	0	0	0	0	0	glycerol-3-phosphate_dehydrogenase_[NAD(+)],_cytoplasmic-like
LOC121410360	2.00229	2.31616	1.41328	0	1.06001	0	2.68705	0	0.523593	1.9807	0	0	3.2612	2.35831	0	multiple_epidermal_growth_factor-like_domains_protein_11
LOC121410361	41.1395	28.553	40.6524	9.70596	6.53373	43.8962	22.0835	42.5996	6.4547	16.2784	57.3244	7.80765	104.975	19.3817	10.3103	hepatoma-derived_growth_factor-related_protein_2-like
LOC121410363	552.104	1027.69	735.472	282.835	724.53	507.709	1226.17	809.236	46.7688	294.229	671.405	892.852	563.602	370.929	89.6466	uncharacterized_LOC121410363
LOC121410365	0	0	8.11787	0	0	0	0	0	9.02257	17.0658	0	0	18.7324	0	0	DAZ-associated_protein_2-like
LOC121410367	10.4421	6.0395	0	8.21197	22.1121	13.2641	7.00661	2.70318	4.09587	5.16477	12.9913	3.30293	0	12.2988	0	uncharacterized_LOC121410367
LOC121410368	0.667431	0.772055	2.82655	0.524886	0	0	0.895684	0.691119	1.74531	0.660235	1.32858	0	0	0	0	talin-1-like
LOC121410371	0	3.89189	0	0	1.78115	0	0	1.74195	0	0	0	0	0	0	0	cullin-1-like
LOC121410373	4.66472	5.39595	0	1.83423	2.46949	0	0	0	0	0	0	0	0	2.74707	0	CDC42_small_effector_protein_2-like
LOC121410375	0	0	15.3293	0	0	0	0	11.2445	5.67922	0	0	0	5.89551	0	0	RNA_exonuclease_4-like
LOC121410376	5.30947	6.14176	14.9903	0	0	10.791	0	54.9791	0	0	0	6.71771	11.5303	0	0	huntingtin-interacting_protein_K-like
LOC121410379	0.529118	0.612061	0	1.66445	0.560227	0	0	0	0.276725	0.523413	1.05326	0	0	1.2464	0	cubilin-like
LOC121410380	0	0	0	3.01495	2.70609	0	3.42988	0	0.668338	0	0	1.61685	2.77517	3.01026	0	LIM_and_SH3_domain_protein_Lasp-like
LOC121410381	22.691	63.4326	18.6853	28.2543	36.0376	26.9017	27.9135	35.2445	2.96681	3.74106	50.8147	21.5321	20.532	31.1799	0	LIM_and_SH3_domain_protein_1-like
LOC121410390	0	0	0	2.00997	0	0	0	0	0	0	0	0	0	0	0	GA-binding_protein_subunit_beta-1-like
LOC121410391	0	6.86618	0	0	0	0	0	0	0	0	0	0	0	0	0	ATP-dependent_DNA_helicase_Q5-like
LOC121410392	0	9.21014	0.802833	0.894509	2.40862	1.15586	3.05285	0	0.892305	0	1.13209	1.43912	1.85258	2.67935	1.14025	twitchin-like
LOC121410393	10.1267	0	0	1.32732	0	6.86051	2.26499	0	0	3.33918	11.7589	4.27088	5.49791	0	3.38393	non-homologous_end-joining_factor_1-like
LOC121410394	0	11.8023	7.20151	0	0	0	0	0	0	10.0929	0	0	0	0	0	diamine_acetyltransferase_1-like
LOC121410397	1.59229	1.84189	26.9732	0	0	4.85425	0	14.8392	0	0	0	0	12.1026	1.87541	0	cytoplasmic_aconitate_hydratase-like
LOC121410399	0	0	4.48345	4.99542	0	0	0	9.86623	0	0	0	0	0	0	3.18388	uncharacterized_LOC121410399
LOC121410400	3.44057	0	14.5707	0	3.64285	0	0	0	0	6.80695	10.2732	0	0	0	10.3473	DNA-binding_protein_P3A2
LOC121410402	0	0	0	2.42844	0	0	0	0	0	0	0	0	0	0	0	leukotriene_A-4_hydrolase-like
LOC121410403	0	0	9.4172	0	0	0	0	0	0	0	0	0	0	2.61906	0	PDZ_domain-containing_protein_8-like
LOC121410404	6.77922	7.84191	0	0.761624	0	0.984149	0	0	0	0.958019	0	3.67598	1.05158	0	0.970858	protein_polybromo-1-like
LOC121410405	0	2.63765	0	0	0	0	0	0	0.397512	0	0	0	0.825302	0	0	uncharacterized_LOC121410405
LOC121410406	0	0	17.2493	0	0	4.65641	6.14924	0	0	1.51093	0	0	3.31696	0	0	uncharacterized_LOC121410406
LOC121410407	10.9038	2.5226	36.9417	6.86002	4.61794	13.2965	5.85309	38.3886	0	0	2.1705	11.0366	37.8866	0	0	inositol-pentakisphosphate_2-kinase-like
LOC121410409	3.65848	4.23196	0	0	0	3.71774	0	0	0	0	0	4.62882	0	0	0	epoxide_hydrolase_1-like
LOC121410410	21.633	8.93717	47.9888	10.9368	8.18031	23.5537	14.5156	9.60033	2.42441	7.64276	7.68973	3.91011	8.38913	1.81996	7.74519	epoxide_hydrolase_4-like
LOC121410411	1.21833	4.22794	0	0.958129	0	0	1.63499	0	0	0	1.2126	0	1.32289	0	0	ankyrin_repeat_and_SOCS_box_protein_13-like
LOC121410412	35.2099	0	19.8817	0	0	0	0	7.29191	0	0	14.0177	17.8195	0	0	0	ankyrin_repeat_and_SOCS_box_protein_13-like
LOC121410413	1619.91	859.76	1748.69	1303.91	1468.97	1868.22	555.835	361.792	11.296	17.5954	1989.12	728.196	277.29	445.933	7.64196	serine/threonine-protein_kinase_Nek4-like
LOC121410414	1.90404	0	0	2.99478	0	0	5.11039	0	0.995799	3.76702	0	0	0	0	1.90875	uncharacterized_LOC121410414
LOC121410415	2.40163	0	3.39027	0	2.54283	2.44053	0	7.46059	0	0	2.39033	0	0	0	0	solute_carrier_family_23_member_1-like
LOC121410419	0	2.43616	0	0	0	0	0	0	0	0	0	0	0	0	0	TBC_domain-containing_protein_kinase-like_protein
LOC121410423	0	0	5.89748	0	0	0	0	0	0	0	0	5.28577	0	14.7616	0	protein_SEC13_homolog
LOC121410424	0	0	0	0.73103	0	0	3.74237	0	1.45846	0.919536	0	1.17611	0	0	3.72744	cadherin_EGF_LAG_seven-pass_G-type_receptor_2-like
LOC121410429	10.633	15.6542	4.09366	7.60186	4.09386	13.7521	23.3498	0	3.03325	6.69347	30.7868	29.3524	2.09918	2.27701	0	uncharacterized_LOC121410429
LOC121410430	0	0	0	7.10262	0	0	0	0	0	0	11.9854	3.80898	0	3.54578	0	mitochondrial_substrate_carrier_family_protein_ucpB-like
LOC121410433	0	5.63904	0	0	0	0	0	0	0	0	0	0	0	0	0	uncharacterized_LOC121410433
LOC121410438	5.10315	2.95155	3.60195	0	5.40319	0	0	7.92641	1.33446	10.0963	0	3.22834	0	0	0	metalloproteinase_inhibitor_1-like
LOC121410440	0	6.72757	0	0	24.6313	0	5.20324	0	0	0	0	0	0	0	0	tissue_inhibitor_of_metalloproteinase-like
LOC121410441	0	12.5436	0	0	0	0	0	28.0715	0	0	0	0	47.0975	0	0	metalloproteinase_inhibitor_3-like
LOC121410442	1.63464	5.67263	4.6151	3.85657	0	0	0	0	10.2588	1.61701	0	0	0	0	9.83211	uncharacterized_LOC121410442
LOC121410443	0	6.12483	11.2117	6.246	25.2276	0	0	8.22413	4.15374	13.0944	0	0	0	31.1814	7.96191	uncharacterized_LOC121410443
LOC121410444	13.6341	3.94282	0	5.3611	0	0	0	0	1.78263	6.74353	0	4.31257	0	0	0	metalloproteinase_inhibitor_1-like
LOC121410451	1.41046	3.26313	1.99109	0	0	0	0	1.46052	0	0	1.40383	0	6.12605	0	1.41396	polynucleotide_5'-hydroxyl-kinase_NOL9-like
LOC121410453	1048.61	1842.44	1423.13	792.82	1416.88	911.334	1459.46	859.31	110.742	592.965	1110.31	1475.46	619.597	812.369	134.23	guanine_nucleotide-binding_protein-like_NSN1
LOC121410455	117.688	127.627	0	92.5528	109.031	41.1105	78.9677	19.0413	46.1624	160.076	76.8693	60.4916	7.98674	21.6583	0	histone-lysine_N-methyltransferase_SETMAR-like
LOC121410460	0	0	1.86991	2.08343	0	1.34608	0	1.37163	0	0	0	1.67595	0	1.56014	0	uncharacterized_LOC121410460
LOC121410462	0	0	1.64875	0	0	1.18687	0	0	0	0	1.16246	0	3.80457	0	0	DENN_domain-containing_protein_2A-like
LOC121410465	0	0	0	2.3167	0	0	0	6.10082	1.54066	0	0	0	0	6.9393	0	protein_SHQ1_homolog
LOC121410466	132.92	146.069	150.11	47.0395	211.103	175.596	80.2699	185.811	10.4275	59.1693	205.058	42.0438	151.544	62.6217	6.66247	protein_lifeguard_4-like
LOC121410467	0	4.49981	0	0	4.11873	0	15.6611	0	0	3.84808	0	0	4.22387	0	0	GATA_zinc_finger_domain-containing_protein_1-like
LOC121410468	5.94874	15.4828	4.19879	1.16956	1.57462	10.5789	0	7.69984	0.777787	0	14.8019	0	25.8371	1.75161	0	TRAF3-interacting_protein_1-like
LOC121410470	3.55685	0	5.02105	0	0	0	9.5465	0	0	0	3.54013	9.00049	0	0	0	cholinesterase_1-like
LOC121410473	0	0	5.70214	0	0	0	0	8.36537	0	0	0	0	0	0	0	uncharacterized_LOC121410473
LOC121410475	0.968705	0	0	0.761816	0	0	0	0	0	0	0	0	0	0	0	protein_bicaudal_D_homolog_1-like
LOC121410477	0	6.83625	0	3.09844	8.34307	0	2.64365	0	0	0	5.88205	4.98489	0	2.32022	5.92447	uncharacterized_LOC121410477
LOC121410479	0	4.05897	0	0	0	1.78289	0	0	0	0	0	2.21981	0	0	1.75881	uncharacterized_LOC121410479
LOC121410481	8.0392	18.5988	0	0	8.51186	0	0	13.8742	2.80296	5.30168	8.0014	0	8.72915	0	5.37274	dolichyl-diphosphooligosaccharide--protein_glycosyltransferase_subunit_1-like
LOC121410482	0	9.17775	0	0	5.60034	0	0	0	1.38315	0	0	0	2.87165	0	0	RNA-splicing_ligase_RtcB_homolog
LOC121410484	0	4.95104	0	0	0	0	0	0	0	0	0	0	0	0	0	putative_gamma-glutamylcyclotransferase_CG2811
LOC121410486	2.71621	0	1.91718	0	0	4.14032	1.82256	1.40631	0	0	1.35172	1.71832	0	1.59958	1.36147	uncharacterized_LOC121410486
LOC121410491	0	15.7503	0	5.35397	7.20824	3.45913	0	7.0496	0	10.1019	6.77596	21.5342	14.7845	24.0554	0	gamma-interferon-inducible_lysosomal_thiol_reductase-like
LOC121410493	95.5347	103.043	78.3659	37.5655	151.727	99.7062	136.869	92.2412	8.10227	51.0836	98.9403	65.3371	67.2867	51.699	6.47103	protein_FAM72A-like
LOC121410494	2.22819	7.73241	0	1.75231	2.35919	1.13214	2.9902	0	1.74799	2.20417	1.10886	2.81918	0	1.31219	0	SLIT-ROBO_Rho_GTPase-activating_protein_1-like
LOC121410495	6.4216	5.94258	7.25207	3.03007	5.43931	6.52562	8.61771	7.97941	0	0	0	8.12481	12.5509	13.6141	2.575	mutS_protein_homolog_4-like
LOC121410498	1.15323	1.334	4.88388	0.906929	0	0	4.64285	0	0	1.14079	0	1.4591	0	0	0	transcription_factor_E3-like
LOC121410503	0	3.95423	0	0	0	0	0	0	1.78779	0	0	2.16252	0	0	0	probable_G_protein-coupled_receptor_85
LOC121410505	3.49271	2.69348	1.6435	2.74676	0	0	3.12478	0	0.608888	0	0	0	0	0	0	multiple_epidermal_growth_factor-like_domains_protein_6
LOC121410508	0	1.49539	193.441	0	4.10626	0	17.3485	274.419	0	10.2305	3.86001	6.54251	221.784	9.13563	9.07163	AP-5_complex_subunit_beta-1-like
LOC121410509	58.8351	77.9572	134.398	41.2219	46.4375	59.7882	103.361	69.7848	11.7487	35.9787	77.723	73.0867	60.3999	36.5381	1.07238	uncharacterized_LOC121410509
LOC121410510	0	3.58882	0	0.813294	3.2849	0	0	0	0	0	1.0293	1.30846	0	0	0	THO_complex_subunit_2-like
LOC121410512	327.998	72.2694	521.817	53.2271	110.248	317.44	151.381	339.639	5.44574	24.0342	304.001	59.2849	367.454	30.6602	0	mitochondrial_import_inner_membrane_translocase_subunit_Tim17-B-like
LOC121410513	5.47793	4.75247	21.2656	0	0	0	5.51349	69.4863	0.71623	2.70943	2.72609	5.19814	60.9676	0	0	ATP-binding_cassette_sub-family_C_member_9-like
LOC121410517	3.33166	21.1965	4.70315	0	0	3.38563	2.23552	0	0.871216	1.64787	11.606	0	10.8528	3.92404	1.66995	ras-related_protein_Rab-7a-like
LOC121410518	226.231	308.799	0	252.638	383.251	183.917	224.663	0	28.3961	67.1375	144.107	417.903	9.82586	122.57	9.07163	uncharacterized_LOC121410518
LOC121410519	0	0	3.33707	0	0	2.40223	0	0	0	0	0	0	2.56682	0	0	uncharacterized_LOC121410519
LOC121410521	5.5087	2.12407	5.18426	0	0	5.59794	0	3.80281	1.92067	0	5.48279	0	5.98147	0	0	26S_proteasome_non-ATPase_regulatory_subunit_6-like
LOC121410522	0	0	47.1542	0	0	0	44.827	0	0	0	0	0	36.2702	118.028	0	uncharacterized_LOC121410522
LOC121410523	0	9.2222	7.50292	0	0	0	0	2.75181	0	0	5.28998	3.36234	0	6.26001	0	ubiquitin-conjugating_enzyme_E2_N-like
LOC121410524	0	1.73272	0	0	0	0	0	4.65323	1.5668	1.48176	1.49087	3.79042	8.13234	0	0	DDB1-_and_CUL4-associated_factor_1-like
LOC121410526	0	1.23673	1.50925	0.840796	1.13199	3.25936	0	0	0	1.05761	1.06411	0	0	0	0	protein_kinase_C_delta_type-like
LOC121410527	0	8.27222	3.36502	0	2.52389	0	0	0	0	0	0	0	2.58832	0	0	peptide_methionine_sulfoxide_reductase_MsrB-like
LOC121410529	2.55752	0	3.61034	0	0	5.19791	0	0	0	0	0	0	0	0	0	transmembrane_protein_adipocyte-associated_1_homolog
LOC121410530	38.9143	12.8612	0	0	0	22.597	0	5.75649	14.5371	0	44.2644	0	0	0	0	uncharacterized_LOC121410530
LOC121410531	5.74845	49.8716	36.5167	0	0	17.5247	7.71434	20.8336	0	0	31.4678	18.1828	37.4507	37.238	14.4067	uncharacterized_LOC121410531
LOC121410533	93.8505	7.48705	0	0	0	72.3503	4.34298	0	0	12.8053	48.3151	4.09458	0	0	3.24424	uncharacterized_LOC121410533
LOC121410535	7.46869	0	10.5432	0	0	5.05979	0	0	0	0	9.91143	0	0	2.93222	0	uncharacterized_LOC121410535
LOC121410536	137.257	250.695	346.729	36.9278	7.6488	29.3644	310.228	205.713	7.55628	7.14618	35.9505	169.092	74.5185	0	10.8629	testis-expressed_protein_264-like
LOC121410537	0	0	0	2.53438	0	0	0	0	0	0	3.2075	0	0	0	0	meiosis_expressed_gene_1_protein_homolog
LOC121410538	0	1.81407	0	0	0	14.3428	4.20911	0	0	3.10266	0	0	0	0	0	THO_complex_subunit_2-like
LOC121410539	0	0	0	2.57763	0	0	0	6.78794	0	0	0	12.4409	3.55894	0	0	long-chain_specific_acyl-CoA_dehydrogenase,_mitochondrial-like
LOC121410541	0	15.5152	3.78683	6.32887	0	0	0	0	1.40295	10.6145	2.66993	0	14.5638	0	5.37836	protein_transport_protein_Sec61_subunit_alpha-like_1
LOC121410542	0	2.74633	0	0	0	0	0	0	0	0	0	0	0	0	0	myotubularin-related_protein_14-like
LOC121410543	7.83559	13.5958	0	6.16212	0	15.9251	5.25763	4.05684	2.04898	3.87555	27.2956	24.7846	0	4.6144	0	mitochondrial_tRNA-specific_2-thiouridylase_1-like
LOC121410544	0	0	0	3.4694	0	0	0	0	0	2.18202	0	2.79085	0	0	0	thiosulfate_sulfurtransferase/rhodanese-like_domain-containing_protein_2
LOC121410546	33.5703	33.2851	27.0798	22.6291	25.3886	9.74689	45.0509	19.8638	0	9.48809	28.6392	6.06775	10.4147	16.9454	14.4229	uncharacterized_protein_C12orf45_homolog
LOC121410547	0	2.86497	0	1.94776	0	0	3.32373	0	0	0	2.46508	3.13363	0	0	0	protein_canopy_homolog_2-like
LOC121410549	0	2.25619	0	0	0	0	2.61747	0	0	0	0	0	0	0	0	G-protein_coupled_receptor_moody-like
LOC121410551	0	24.3817	0	5.52534	18.5974	0	0	3.63762	0	0	0	0	0	0	0	origin_recognition_complex_subunit_4-like
LOC121410552	0.742514	2.57672	0	2.91967	0.786169	0	0	2.3066	0	0	0	0	0	0	0	activin_receptor_type-2A-like
LOC121410553	2.13857	6.1845	0	7.56822	6.7929	1.08661	17.2196	0	3.35536	1.05775	4.25702	2.70578	1.16105	5.03763	2.14386	tax1-binding_protein_1_homolog
LOC121410554	1.9589	1.13298	0	0	0	0	1.31441	2.02842	2.04898	0.968889	0	1.23923	0	0	0	cold_shock_domain-containing_protein_E1-like
LOC121410555	2.55837	50.3101	21.6693	90.5389	154.401	15.5989	51.4996	15.895	2.67602	20.2463	40.7415	64.7388	2.77794	18.0796	12.8235	sodium-dependent_multivitamin_transporter-like
LOC121410556	19.2732	217.371	139.437	117.467	38.262	17.1373	45.2628	194.583	20.1595	26.215	50.3544	57.9147	423.778	102.151	28.9814	procathepsin_L-like
LOC121410557	0	19.0302	0	7.76269	0	0	4.41551	10.2212	0	22.7836	0	0	0	3.87531	16.4921	cystine/glutamate_transporter-like
LOC121410558	1.01665	0	7.17578	0.799518	1.07642	4.13246	8.18596	1.05273	0	3.01706	5.05933	1.28629	1.1039	4.78965	0	uncharacterized_LOC121410558
LOC121410559	0	0	0	1.95217	0	0	0	0	0	0	0	0	8.08609	0	0	complement_C1q_tumor_necrosis_factor-related_protein_3-like
LOC121410560	0	11.5417	0	3.92335	0	0	6.69495	0	0	0	4.96537	0	0	0	0	cystine/glutamate_transporter-like
LOC121410561	10.2199	8.86643	7.21348	20.093	10.8207	2.59636	24.0012	2.64565	12.0261	12.6371	12.7148	6.46527	0	0	10.2452	uncharacterized_LOC121410561
LOC121410562	40.3508	252.051	11.3923	63.466	153.803	0	129.961	16.7132	4.22064	0	0	71.4745	8.76277	9.50508	0	pseudouridylate_synthase_7_homolog
LOC121410563	0	4.71716	0	0	2.87845	1.38133	0	5.6302	0.710908	0	0	1.71984	1.47596	0	1.36267	uncharacterized_LOC121410563
LOC121410564	2.39414	8.30831	10.1391	0	0	4.86585	9.63872	2.47911	6.26059	7.10498	7.14865	15.1457	0	2.81983	4.80014	G-protein_coupled_receptor_52-like
LOC121410565	38.366	11.095	0	18.8576	20.3109	4.87344	12.8717	9.93192	5.01629	0	0	0	0	11.2969	0	pseudouridylate_synthase_7_homolog
LOC121410566	0	0	6.14474	0	0	0	0	0	0	0	0	0	0	0	0	uncharacterized_LOC121410566
LOC121410567	5.36134	6.20176	5.40598	3.61397	3.24374	6.2265	5.13918	4.75853	0.801126	7.57647	5.33613	4.84524	4.98982	4.51044	0.767802	importin-9-like
LOC121410570	7.56098	0.971801	1.18595	0.660685	1.779	2.56116	4.50967	0	0	0	8.36158	5.31467	0.912209	0.989485	0	FYVE,_RhoGEF_and_PH_domain-containing_protein_2-like
LOC121410573	0	0	6.72657	0	1.68172	0	4.26307	1.64471	0	0	0	0	0	0	0	ubiquitin_carboxyl-terminal_hydrolase_19-like
LOC121410574	0	0	6.36471	0	0	0	0	4.6687	0	0	0	5.70453	0	0	0	acylglycerol_kinase,_mitochondrial-like
LOC121410575	180.033	222.783	248.234	39.5115	150.721	157.422	191.034	143.068	10.9484	62.125	208.356	180.108	90.9227	83.8312	25.1831	thrombospondin-2-like
LOC121410577	1.23319	2.85301	0	0	0	3.75951	3.30986	0	0	1.2199	0	0	0	0	0	RNA-binding_protein_15-like
LOC121410578	4.98948	1.15432	0	0.784772	4.22626	2.02812	0	0	0	0	2.97961	0	0	0	0	ankyrin_repeat_and_BTB/POZ_domain-containing_protein_1-like
LOC121410579	8.15872	3.14588	3.8391	4.27749	14.3973	2.76363	10.9489	0	0	0	2.70679	0	0	0	0	zinc_finger_protein_277-like
LOC121410580	2.40087	0	3.38921	1.88811	0	7.3193	0	2.48609	0	0	0	3.03767	0	0	0	monoglyceride_lipase-like
LOC121410581	147.873	114.887	105.931	43.3924	109.831	116.627	189.559	109.699	2.30856	43.6654	140.588	64.2264	71.8945	41.5919	4.42506	uncharacterized_LOC121410581
LOC121410583	0	0	1.71334	0	5.14028	0	0	0	0	0	0	0	0	0	0	receptor-type_tyrosine-protein_phosphatase_delta-like
LOC121410589	2.5314	0	0	5.97228	2.68023	0	0	2.62124	3.97171	5.00821	0	0	0	0	0	ETS_domain-containing_protein_Elk-3-like
LOC121410590	5.78742	1.67366	2.04246	3.41354	1.53192	4.41088	0	0	1.51339	1.43125	0	5.49182	0	0	2.90087	double-stranded_RNA-specific_editase_1-like
LOC121410591	1652.61	2201.45	1641.89	501.57	782.189	1415.72	1975.94	1373.78	110.963	978.601	1894.18	1628.44	1051.96	788.819	137.098	carbohydrate_sulfotransferase_15-like
LOC121410592	0	4.77802	0	0	0	0	0	0	1.08012	0	4.11111	0	0	0	0	dihydrofolate_reductase-like
LOC121410595	1.55444	1.7981	0	0.611225	0	1.57962	4.17207	8.04802	0.812959	2.30651	0	2.95008	4.2196	7.32329	7.01228	separin-like
LOC121410596	0	9.24504	0	0	3.62661	1.16024	0	0	0.597124	2.25887	0	1.44457	0	4.03426	5.72285	macrophage_mannose_receptor_1-like
LOC121410597	0	4.54817	0	6.1842	0	0	0	1.01784	0	0	0	0	0	0	0	macrophage_mannose_receptor_1-like
LOC121410598	0	2.06246	0	0	0	0	0	0	0	0.881871	0	1.12793	0	0	0	uncharacterized_LOC121410598
LOC121410599	0	0	0	5.13554	0	3.318	4.38173	0	0	0	9.74926	0	0	0	0	protein_HEXIM1-like
LOC121410604	2.73848	3.16775	1.9329	1.07681	1.44974	0	1.8375	4.2535	0	6.77238	1.3628	0	1.48675	3.22539	0	serine--tRNA_ligase,_cytoplasmic-like
LOC121410605	3.01286	2.32343	0	3.94899	0	4.08223	4.04322	0	0	0	3.99826	2.54131	0	0	0	ras_association_domain-containing_protein_5-like
LOC121410607	0	1.09353	2.669	0.743443	0	0	1.26864	1.95779	0	0	0	0	1.02647	0	0	high_mobility_group-T_protein-like
LOC121410608	4.47977	2.591	3.16194	0	0	0	3.0059	4.63876	0	4.43147	0	5.66795	0	0	0	protein_Spindly-B-like
LOC121410609	0	18.5535	0	0	0	0	0	0	0	0	0	0	0	0	0	uncharacterized_LOC121410609
LOC121410613	6.47518	18.7255	0	2.54613	17.1397	3.29004	17.3792	0	0	0	3.22236	0	7.03089	0	3.2456	isocitrate_dehydrogenase_[NAD]_subunit_gamma,_mitochondrial-like
LOC121410617	0	8.52482	0	2.31826	2.34086	0	0.98899	0	0	2.18704	0	0	0	0.867994	0	uncharacterized_LOC121410617
LOC121410618	3.03308	7.01707	0	0	0	18.4933	0	0	0	0	9.05646	0	0	0	3.04059	THAP_domain-containing_protein_5-like
LOC121410619	0	5.48927	6.69887	0	0	0	0	0	0	0	0	0	0	0	9.51429	uncharacterized_LOC121410619
LOC121410625	0	12.1078	0	0	0	0	7.02331	27.0963	0	0	0	0	5.68267	0	0	ragulator_complex_protein_LAMTOR5-like
LOC121410626	0	0	0	2.76141	0	0	0	0	0	0	0	0	0	0	0	mitochondrial_coenzyme_A_transporter_SLC25A42-like
LOC121410627	0	0	5.82151	0	8.73269	4.19069	22.1368	0	0	8.15884	0	5.21767	0	4.85713	0	D(2)_dopamine_receptor-like
LOC121410628	8.63513	15.6966	6.96562	1.94026	5.22447	0	8.27731	5.10949	0.645159	2.44058	7.36673	9.36467	5.35784	13.0764	0	disintegrin_and_metalloproteinase_domain-containing_protein_10-like
LOC121410629	0	0	3.39664	0	2.5476	0	0	9.96614	0	2.3802	0	0	0	8.50189	0	disintegrin_and_metalloproteinase_domain-containing_protein_10-like
LOC121410632	0	0	4.77144	0	0	3.43478	0	0	0	0	0	0	0	0	3.38839	uncharacterized_LOC121410632
LOC121410633	25.5455	14.7749	0	0	0	0	0	0	0	0	0	0	6.93446	7.5219	0	uncharacterized_LOC121410633
LOC121410635	6.1958	10.7506	0	0	0	0	0	0	0	0	3.08333	0	0	0	0	ras-like_protein_rasD
LOC121410636	0	4.58099	0	0	0	0	0	4.10076	0	0	0	0	0	0	0	natural_resistance-associated_macrophage_protein_2-like
LOC121410637	56.4911	145.214	97.4675	74.0436	179.437	108.434	109.504	181.988	13.1309	130.392	162.429	119.124	163.572	125.678	12.5847	zinc_finger_protein_830-like
LOC121410638	0	0	0	4.25041	0	5.49227	0	2.79827	0	13.3661	0	0	5.86856	0	0	molybdenum_cofactor_sulfurase-like
LOC121410640	6.59373	2.54245	1.55135	5.18549	2.32713	11.1676	5.89914	17.0694	0	0	4.37515	5.56174	5.96635	2.58871	0	sorting_nexin-12-like
LOC121410641	0	0	0	4.76997	4.28131	8.21817	0	0	0	0	10.0614	5.11607	0	11.9064	0	uncharacterized_LOC121410641
LOC121410642	0	0	0	14.6828	0	0	0	0	0	0	0	0	10.1363	10.9949	0	protein_FMC1_homolog
LOC121410644	7.07657	2.72862	0	3.71014	2.49754	0	9.49667	0	7.40199	4.66685	0	0	0	0	0	MFS-type_transporter_SLC18B1-like
LOC121410646	0	2.00025	0	0	1.83086	0	0	0	0	0	0	0	0	2.03665	0	uncharacterized_LOC121410646
LOC121410648	20.8772	24.1498	0	13.1347	0	29.7015	0	0	6.55117	8.26083	4.1558	31.6974	0	0	4.18577	GATOR_complex_protein_NPRL2-like
LOC121410649	0	2.43783	0	0	0	0	1.4141	0	0	2.08475	0	0	0	0	0	uncharacterized_LOC121410649
LOC121410650	4.43579	2.56557	0	1.74422	0	9.01531	11.9056	0	0	2.19398	8.82987	2.80616	0	0	0	kelch-like_protein_2
LOC121410651	0	8.72998	0	0	0	0	0	0	0	3.73279	0	4.77433	0	0	0	NAD(P)H-hydrate_epimerase-like
LOC121410653	0	0	0	10.1674	3.42217	0	0	3.34685	0	0	0	0	0	3.80683	0	myeloid_differentiation_primary_response_protein_MyD88-like
LOC121410655	1.73036	0	2.44267	0	0	1.75839	2.32212	1.79177	0	0	10.3333	6.56792	0	0	3.46929	uncharacterized_protein_K02A2.6-like
LOC121410657	103.45	142.721	92.4444	45.5293	121.59	86.8009	160.48	62.8969	1.98545	40.3704	108.631	105.671	29.8854	65.952	14.2714	E3_ubiquitin-protein_ligase_arkadia-C-like
LOC121410658	637.888	1226.18	860.752	541.489	1428.25	592.932	1268.95	621.673	67.7034	287.666	761.866	1113.29	450.211	793.293	45.1388	protein_N-terminal_glutamine_amidohydrolase-like
LOC121410661	0	0	0	3.98546	26.8288	0	0	0	0	0	0	0	5.50274	11.9378	0	uncharacterized_LOC121410661
LOC121410663	0	0	7.20869	4.01593	0	0	0	0	0	0	0	0	0	0	0	cysteine-rich_protein_2-binding_protein-like
LOC121410664	0	0	0	1.28416	0	0	2.19133	0	0	0	0	0	0	0	0	iduronate_2-sulfatase-like
LOC121410665	7.67819	21.3163	8.67117	1.20767	6.50369	0	2.06081	4.77042	0	10.6336	0	5.82882	3.33486	9.04341	4.61832	eukaryotic_translation_initiation_factor_4B-like
LOC121410666	7.85964	11.3646	2.77378	13.9073	2.08043	0	21.0951	8.13859	10.2763	27.2121	1.95567	9.94427	4.26709	2.31428	1.96977	protein_BTG1-like
LOC121410667	12.1371	0	17.1334	3.81798	0	17.2672	3.25757	22.6222	0	2.40125	0	0	0	5.71807	7.3003	uncharacterized_LOC121410667
LOC121410668	0	4.59283	0	0	0	0	0	0	0	0	0	0	0	0	0	non-structural_maintenance_of_chromosomes_element_3_homolog
LOC121410671	2.82872	3.27214	31.9454	0	8.98508	0	0	2.92911	1.4794	5.59644	8.44625	0	15.3574	9.99504	2.83572	dnaJ_homolog_subfamily_C_member_2-like
LOC121410672	0	2.00296	2.44433	0	0	1.75958	4.64738	0	0	0	0	0	0	0	1.73582	uncharacterized_LOC121410672
LOC121410676	8.70407	13.4247	4.09572	4.56341	9.21582	0	3.89359	0	1.51739	8.61023	11.5509	0	0	0	0	RNA_polymerase-associated_protein_LEO1-like
LOC121410678	0	0.715434	0	0.486392	0	0	0	0	0	0.611815	0	0	0	0	0.620014	uncharacterized_LOC121410678
LOC121410680	0	4.29261	0	3.40474	0	0	3.31999	0	0	1.22363	0	3.1301	0	0	0	uncharacterized_LOC121410680
LOC121410681	2.83707	50.0475	0	11.1558	3.00388	0	9.5183	0	0.370943	0.701621	0.705933	18.8452	0.77014	0.83538	0	uncharacterized_LOC121410681
LOC121410682	5.11675	65.1071	0	8.0479	2.70879	0	0	0	0	0	0	16.1847	0	0	0	collagen_alpha-1(I)_chain-like
LOC121410689	2.40589	13.9151	2.26419	0	0	6.51963	3.22867	3.3217	0	0	5.58734	4.05868	0	0	0	collagen_alpha-1(I)_chain-like
LOC121410692	0	7.78207	0	0	0	0	0	0	0	0	0	0	0	0	0	homeobox_protein_Hox-B7-B-like
LOC121410695	0	2.54572	0	0	0	0	0	0	0	0	0	8.35336	0	0	0	homeobox_protein_Hox-D9-like
LOC121410696	0	18.1834	0	0	0	3.99348	0	8.13859	0	0	11.734	0	0	0	0	homeobox_protein_Hox-A10-like
LOC121410701	0	1.88008	0	0	0	0	0	0	0	0	0	0	0	0	0	protein_disulfide-isomerase_A5-like
LOC121410702	8.22569	22.2019	0	0	5.80621	0	3.67959	0	0	21.6987	2.729	3.46914	2.97721	6.45885	2.74869	amidase-like
LOC121410705	9.95826	5.75964	7.02882	0	3.51458	3.37319	4.45462	1.71862	0	1.64182	4.95572	6.29976	7.2086	1.95482	1.66382	RNA-binding_protein_10-like
LOC121410707	0	15.8983	19.4016	14.4114	0	4.65549	0	4.74387	0	4.53188	0	0	0	0	0	NADH_dehydrogenase_[ubiquinone]_1_beta_subcomplex_subunit_11,_mitochondrial-like
LOC121410708	183.845	257.436	129.763	171.214	128.062	172.074	227.24	95.1851	48.0749	114.861	255.21	146.91	89.3052	125.362	92.1502	uncharacterized_LOC121410708
LOC121410709	9.0599	10.4801	12.7895	0	0	0	0	0	4.73827	0	0	0	9.83745	10.6708	0	THO_complex_subunit_7_homolog
LOC121410710	1.17907	4.09168	1.66444	1.8545	0	0	3.16459	3.66274	1.23329	0	2.34704	2.98359	0	1.38871	0	inosine-5'-monophosphate_dehydrogenase_1b-like
LOC121410711	715.295	773.793	776.012	364.601	1016.81	841.299	959.917	569.228	93.5236	314.481	1100.86	829.597	474.64	678.663	92.953	uncharacterized_LOC121410711
LOC121410712	0	0	6.12739	1.70677	0	0	0	0	1.13504	0	0	0	0	0	0	putative_aldolase_class_2_protein_PA3430
[truncated: 7,986 more rows]

## Sheet: Lv_FBStimecourse Marker GeneExp
Table S7. Transcriptional changes in the L. variegatus embryonic cell cultures assessed by bulk RNA-Seq on Day 20, 182, 313, 445, and 738 (Transcripts per million for selected marker genes)
Gene ID	FBS5_D20_TPM	FBS5_D182_TPM	FBS5_D313_TPM	FBS5_D445_TPM	FBS5_D738_TPM	FBS10_D20_TPM	FBS10_D182_TPM	FBS10_D313_TPM	FBS10_D445_TPM	FBS10_D738_TPM	FBS15_D20_TPM	FBS15_D182_TPM	FBS15_D313_TPM	FBS15_D445_TPM	FBS15_D738_TPM	Gene Description
Skeletogenic Cell Markers (mesoderm)
LOC121406034	0	97.9439	0	42.0554	0	4.52857	35.8824	0	118.863	8.81666	4.43542	84.5754	0	10.4975	169.762	27_kDa_primary_mesenchyme-specific_spicule_protein-like
LOC121417490	0	0	13.3895	0	0	0	0	0	0	0	0	0	0	0	0	30_kDa_spicule_matrix_protein_alpha-like
LOC121406020	0	20.0612	0	44.3259	0	0	0	0	9.07009	0	0	0	0	0	0	30_kDa_spicule_matrix_protein_alpha-like
LOC121405815	0	0	0	3.86562	0	0	0	0	0	0	0	0	0	0	0	34_kDa_spicule_matrix_protein
LOC121406031	9.26755	10.7203	0	3.64412	0	0	0	0	31.5046	9.16763	0	5.8628	0	0	0	34_kDa_spicule_matrix_protein-like
LOC121427215	0	0	0	4.8452	0	0	0	0	22.5552	10.1577	0	2.59838	0	0	0	mesenchyme-specific_cell_surface_glycoprotein-like
LOC121428121	0	2.78768	0	1.89522	7.6548	0	0	0	0	0	0	0	0	0	0	mesenchyme-specific_cell_surface_glycoprotein-like
LOC121427387	0	0	0	1.66445	0	0	0	0	2.2138	0	0	0	0	0	2.12171	mesenchyme-specific_cell_surface_glycoprotein-like
	9.26755	131.513	13.3895	102.296	7.6548	4.52857	35.8824	0	184.207	28.1419	4.43542	93.0365	0	10.4975	171.883
Pigment Cell Markers (mesoderm)
LOC121428528	939.015	1641.87	290.615	462.637	198.099	734.296	874.468	66.8068	8.8956	59.76	958.534	1007.75	54.1326	149.214	17.0511	probable_polyketide_synthase_1
LOC121418887	0	4.36928	0	0	0	3.83838	10.1379	0	0	0	0	0	0	0	0	homeobox_protein_six1-like
Immune Cell Markers (mesoderm)
LOC121423318	0	5.15644	0	0	0	0	0	2.30794	0	0	0	11.28	0	0	0	antiviral_innate_immune_response_receptor_RIG-I-like
LOC121424758	0	1.71931	0	7.0133	0	0	5.98388	1.53907	0	2.94059	0	3.76109	0	1.7506	5.96	antiviral_innate_immune_response_receptor_RIG-I-like
LOC121429221	1.80432	25.0459	99.3362	11.3517	3.82081	1.83355	38.742	63.5242	6.60553	0	7.18334	13.6973	66.6118	19.1262	0	antiviral_innate_immune_response_receptor_RIG-I-like
LOC121429836	5.62019	6.50119	10.5784	4.41987	0	15.23	27.6548	40.7376	1.95955	3.70639	5.59376	4.74057	36.6152	8.82598	0	B-cell_CLL/lymphoma_6_member_B_protein-like
LOC121410653	0	0	0	10.1674	3.42217	0	0	3.34685	0	0	0	0	0	3.80683	0	myeloid_differentiation_primary_response_protein_MyD88-like
LOC121427405	0	45.575	0	0	0	26.6915	17.6243	6.79955	10.3027	12.9914	6.53561	49.8489	0	7.73405	6.58275	myeloid_leukemia_factor_2-like
LOC121416798	0	0	7.39128	0	0	0	0	0	0	0	0	0	0	0	0	NACHT,_LRR_and_PYD_domains-containing_protein_12-like
LOC121421245	0	2.4375	0	0	0	0	0	0	0	0	0	0	0	2.48185	0	NACHT,_LRR_and_PYD_domains-containing_protein_13-like
LOC121427826	1.13483	1.31272	1.60199	0	0	0	3.04586	2.35021	0	0	0	0	0	0	0	NACHT_domain-_and_WD_repeat-containing_protein_1-like
LOC121427834	21.8992	22.0278	45.6991	10.483	18.1461	22.2539	15.3331	37.4653	2.98777	5.65123	33.1681	7.22805	23.7786	10.0929	9.54495	NACHT_domain-_and_WD_repeat-containing_protein_1-like
LOC121407045	0	0	0	1.0428	1.40395	0	0	0	1.38697	0	0	0	0	0	0	NACHT_domain-_and_WD_repeat-containing_protein_1-like
LOC121411377	3.74624	0.866698	1.05768	2.94615	3.1732	2.28416	5.02741	0.775841	0.391852	0	1.49145	0.947974	0.813551	0	0	NACHT_domain-_and_WD_repeat-containing_protein_1-like
LOC121405590	0	0	0	0.985799	1.32721	0	0	0	0	0	0	0	1.3611	0	5.02648	NACHT_domain-_and_WD_repeat-containing_protein_1-like
LOC121413539	0	0	14.7839	0	0	0	0	8.67554	0	0	0	0	11.3715	0	0	NLR_family_CARD_domain-containing_protein_4-like
LOC121422399	0	0	0	17.7705	0	0	0	0	0	0	0	0	0	0	0	scavenger_receptor_cysteine-rich_domain_superfamily_protein-like
LOC121407539	354.755	563.672	634.968	300.045	489.005	329.213	1239.6	494.878	63.0117	230.422	425.037	682.588	367.758	745.792	100.651	scavenger_receptor_cysteine-rich_domain_superfamily_protein-like
LOC121418958	0	10.6977	0	0	0	0	0	2.39406	2.41833	0	0	8.77568	2.51043	0	18.5418	scavenger_receptor_cysteine-rich_domain_superfamily_protein-like
LOC121430969	10.0824	5.83145	0	1.98227	0	0	0	0	1.31826	4.98685	2.50875	3.18915	0	0	10.1074	scavenger_receptor_cysteine-rich_domain_superfamily_protein-like
LOC121423765	0	13.6893	0	1.86136	2.50601	7.21558	0	0	1.23785	0	7.06716	0	0	0	0	scavenger_receptor_cysteine-rich_domain-containing_group_B_protein-like
LOC121429458	30.0403	43.4366	0	2.95306	0	3.81586	0	3.8883	0	0	3.73738	4.75099	4.0773	0	0	scavenger_receptor_cysteine-rich_domain-containing_group_B_protein-like
LOC121414099	0	0	0	1.82702	2.45978	0	0	0	0	0	0	0	0	0	0	scavenger_receptor_cysteine-rich_type_1_protein_M130-like
LOC121415100	287.66	268.508	518.653	77.2744	202.043	350.205	479.679	622.282	40.9625	352.176	403.948	315.309	615.417	199.594	54.2482	scavenger_receptor_cysteine-rich_type_1_protein_M130-like
LOC121405934	0	0	6.597	7.35032	0	0	0	4.83909	2.44407	4.62285	0	0	0	0	0	toll-interacting_protein-like
LOC121409488	0	0	2.96001	0	0	0	0	0	0	2.07423	0	0	0	0	0	toll-like_receptor_3
LOC121411011	29.2191	44.3617	683.159	7.18084	7.73425	14.8462	78.4234	274.196	0.955087	0	19.9937	143.255	243.899	12.9054	21.9686	toll-like_receptor_3
LOC121422461	0	6.01837	0	0	0	0	0	0	2.72103	5.1467	0	0	0	0	0	toll-like_receptor_3
LOC121427964	6.84131	7.91373	0	1.7934	0	2.31738	0	0	0	0	0	0	0	0	2.28608	toll-like_receptor_3
LOC121425855	0	0	0	2.49359	0	0	8.51029	0	1.6583	0	0	2.00589	0	11.2037	3.17863	toll-like_receptor_6
LOC121427692	7.97384	11.5297	790.757	3.13542	12.664	36.4636	2.6752	1040.36	0	0	7.93635	5.04438	679.667	9.39164	3.99679	toll-like_receptor_Tollo
LOC121408625	0	4.34083	1.76579	0	0	0	0	0	0	0	2.48996	0	0	0	1.25396	vascular_endothelial_growth_factor_receptor_2-like
LOC121422122	0	22.4309	0	6.09991	0	0	5.20455	0	0	0	0	4.90688	0	0	0	complement_C1q_tumor_necrosis_factor-related_protein_2-like
LOC121410559	0	0	0	1.95217	0	0	0	0	0	0	0	0	8.08609	0	0	complement_C1q_tumor_necrosis_factor-related_protein_3-like
LOC121428574	0	0	0	3.26681	0	0	0	0	0	0	0	0	0	2.44629	0	complement_C2-like
LOC121417165	0	0	0	2.98368	2.67802	0	0	1.30954	1.32282	0	0	1.60009	0	0	6.33894	complement_C3-like
LOC121428641	4.14539	3.19681	5.85187	0	4.38912	0	0	0	1.44534	0	1.3753	1.7483	0	1.62749	0	complement_C3-like
LOC121408166	0	0	40.5742	2.26037	0	0	11.5715	47.6197	0	0	0	0	3.1209	0	0	complement_component_1_Q_subcomponent-binding_protein,_mitochondrial-like
LOC121424089	0	0	4.85691	0	0	0	0	0	0	0	0	0	0	0	0	complement_factor_H-like
LOC121427693	13.622	106.362	19.2296	16.069	18.0286	17.3033	63.9819	3.52636	7.1242	0	23.7264	34.47	18.4888	16.044	0	complement_factor_H-like
LOC121427330	0	0	0	2.25615	6.07505	2.91533	7.69994	0	0	0	0	0	0	0	0	echinoidin-like
LOC121407054	0	1.79465	0	0	0	0	0	0	0	0	0	1.96295	0	3.65462	0	erythroid_differentiation-related_factor_1-like
LOC121432266	59.8349	0	8.44663	0	0	18.2413	0	0	0	0	47.6428	0	0	0	0	hematopoietic_prostaglandin_D_synthase-like
LOC121424894	1.99917	2.31255	0	0	0	0	0	0	0	0	0	0	0	0	0	hematopoietically-expressed_homeobox_protein_HHEX_homolog
LOC121411881	0	0	44.4487	0	0	31.9969	0	65.2088	16.4674	15.5737	0	0	34.1891	18.5427	47.3472	macrophage_migration_inhibitory_factor-like
Muscle Cell Markers (mesoderm)
LOC121423582		0	0	4.36348	0	0	0	0	0	5.48866	0	0	4.01644	0	0	muscle,_skeletal_receptor_tyrosine-protein_kinase-like
LOC121425834	0	1.40186	0	0.476533	0.320786	0.307881	0.813173	0.941179	0.633812	0.299707	1.80929	0	0	0.356844	3.64468	muscle_M-line_assembly_protein_unc-89-like
LOC121429542	1.13567	0	0	0.89312	0.601219	1.15407	0.762027	0	1.18789	0	1.13033	0	0.616567	0	0.56924	muscleblind-like_protein_3
LOC121423729	25.4117	39.1935	5.97876	9.99222	0	8.60778	5.68369	0	0	12.5688	0	10.7172	13.7963	4.98834	8.49153	muscle-specific_protein_20-like
LOC121423883	3.12055	0	8.81029	0	0	0	0	9.69391	0	0	0	0	3.38836	0	0	muscle-specific_protein_20-like
LOC121423749	0	2.02671	0	0	0	0	0	0	1.83263	0	3.48765	0	0	0	0	muscle-specific_protein_20-like
LOC121423027	0.796392	1.84246	0	0	0	0	0	0	0	0	1.58529	0	1.72948	0	0	myocardin-related_transcription_factor_A-like
LOC121415207	0	9.19516	3.74046	10.419	0	0	1.77793	0	3.46443	1.31056	1.31862	3.35248	1.43855	0	1.32813	myocyte-specific_enhancer_factor_2A-like
LOC121414041	0	2.02579	0	0	0	1.77963	0	0	0	0	0	0	0	0	0	myophilin-like
LOC446191	1.80453	5.21851	0	0	1.91063	0.916883	0	1.86858	0.471879	0	9.87826	0	1.9594	0	0	myosin_heavy_chain
LOC121408547	1.21544	2.81194	0	0	0	1.23513	0	1.25858	0	0	0	0	0	0	0	myosin_heavy_chain,_striated_muscle-like
LOC121411529	35.1526	9.03622	27.5686	9.21499	0	79.3824	20.9664	12.1334	0	3.86373	54.4247	14.8254	4.24105	0	0	myosin_light_chain_3,_skeletal_muscle_isoform-like
LOC121424934	0	5.32057	0	0	0	0	0	0	1.60369	0	1.52598	0	0	0	0	myosin_light_chain_kinase,_smooth_muscle-like
LOC121425215	3.84685	6.6748	5.43043	0	1.35767	0.651528	0	1.99169	0	0	1.27625	1.62239	4.87316	0	0	myosin_light_chain_kinase,_smooth_muscle-like
LOC121425126	0	8.79333	3.577	3.98546	0	0	0	0	3.97564	0	2.52199	0	0	0	2.54018	myosin_regulatory_light_chain_12A-like
LOC121430536	2.1907	30.4093	0	8.61414	0	2.22619	8.81969	4.53691	3.43717	2.16708	17.4432	0	4.75743	2.58022	8.78451	myosin_regulatory_light_chain_2,_smooth_muscle_minor_isoform-like
LOC121415871	0	0	1.95731	0	0	0	0	0	0	0	4.14005	3.50858	0	0	0	myosin-10-like
LOC121422183	2.65565	15.3597	6.24811	2.78463	2.81179	0	0	6.41644	0.462962	2.62702	3.52422	3.36002	6.72832	2.08523	2.66222	myosin-10-like
LOC121415728	0	0	1.12017	0.62404	0.840167	0	0	0	0	0	0	0	0	0	0	myosin-11-like
LOC121411605	0	42.3448	12.919	3.59855	0	4.64994	12.2814	4.73822	0	13.5794	0	11.5789	24.8426	10.7788	4.58714	myosin-2_essential_light_chain-like
LOC121431922	7.43017	8.5949	0	14.6082	3.93351	0	4.9856	3.84694	5.82889	0	14.7905	14.1013	4.03392	8.7513	0	myosin-4-like
LOC121416977	105.286	128.885	271.281	89.2306	237.022	104.914	216.74	160.888	20.8494	83.9272	129.208	174.597	160.938	158.921	39.9642	myosin-IIIb-like
LOC121416062	30.8197	64.9029	32.3512	60.2829	33.4684	20.0763	64.6908	29.4586	0	0	24.3825	80.9877	12.871	4.6538	2.37662	myosin-IIIb-like
LOC121421431	5.52852	8.52686	2.60146	0	3.90237	0	4.94614	1.90824	0	0	0	4.66324	2.001	0	0	myotrophin-like
LOC121414390	0	0	13.6136	0	0	0	0	0	1.68119	0	0	0	17.4522	0	0	dystrophin-like
LOC121414391	0	1.0838	0	0	0	0	1.25734	0	0	0	0	0	0	0	0	dystrophin-like
LOC121414482	0	1.98329	0	0	0	0	0	0	0	0	0	0	0	2.01938	0	dystrophin-like
Neuronal Cell Markers (Ectoderm)
LOC121430133	5.08795	11.771	3.59122	0	0	2.58518	6.82796	0	2.66096	0	5.06402	6.43744	0	0	0	transcription_factor_Sox-2-like
LOC121420114	29.3326	55.6463	57.9706	29.527	74.5372	42.9232	89.7499	44.953	1.22726	16.2492	16.349	99.4617	33.124	45.6035	2.35242	amyloid-like_protein_1
LOC121420039	0	2.90999	0	0	0	0	0	2.60493	0	4.97705	0	3.18288	0	0	0	neural_cell_adhesion_molecule_1-like
LOC121420426	2.88339	1.66769	2.03518	1.13379	3.05292	0	3.86948	1.49286	0	0	0	0	0	3.39608	0	neural_cell_adhesion_molecule_L1-like
LOC121410776	0	9.03775	0	6.14437	8.27237	0	3.49499	0	1.36205	0	5.18418	3.29509	2.82785	0	2.61078	neural_Wiskott-Aldrich_syndrome_protein-like
LOC121427416	0	0	0	1.20526	0	1.5574	2.0567	1.58697	0	0	0	0	0	0	1.53637	neuralized-like_protein_4
LOC121418785	3.26164	0.943231	11.5108	4.48883	2.59005	4.97172	9.84844	8.44351	0	0	5.68103	6.1901	1.77078	0	0.817429	neurexin-3a-like
LOC121431448	0	4.82053	0	0	0	0	0	0	0	0	0	2.10903	0	0.981649	0	neurexin-4-like
LOC121412155	0	2.84479	0	0	0	2.49912	0	0	0	0	0	0	0	0	0	neurobeachin-like
LOC121412231	0	2.54645	0	0	0	0	0	0	0	0	2.19102	0	0	0	0	neurobeachin-like
LOC121425792	0	0	0	1.32543	0.892234	0	1.13088	0	0	0	0	0	0	0	0	neurobeachin-like_protein_1
LOC121418701	3.46297	1.78036	0	1.21039	1.22219	2.34605	1.54909	1.59372	1.00617	1.14188	3.06372	1.94732	3.76017	0.90638	0	neuroblast_differentiation-associated_protein_AHNAK-like
LOC121415410	0	1.04801	0	0	0	0	0	0.938145	0	0	0	0	0	0	0	neuroblastoma-amplified_sequence-like
LOC121430553	0	0.872912	0	0.593454	1.59798	1.53369	0	0	0	0	0.751073	0	0.819384	0.888797	0	neurocalcin_homolog
LOC121409194	0	9.68448	0	0	0	0	0	0	0	0	0	3.53089	0	0	0	cyclic_nucleotide-gated_channel_cone_photoreceptor_subunit_alpha-like
LOC121408157	0.612957	4.96329	25.0932	6.26659	0.648994	4.3602	1.64516	24.7537	0.320572	3.63809	0.610074	0.775533	8.65231	5.05361	1.22895	neurofibromin-like
LOC121424392	0	2.16601	2.6433	0	0	0	10.0514	0	0	0	0	9.47651	0	0	0	neurofilament_heavy_polypeptide-like
LOC121432068	0	1.85168	2.25971	0	0	0	0	0	0.837181	0	0	0	0	0	0	neurofilament_heavy_polypeptide-like
LOC121425197	0	2.10048	0	0	0	1.84525	0	1.88028	0.949669	0	0	0	0	0	3.64066	neurofilament_medium_polypeptide-like
LOC121408365	16.7996	11.1046	5.08183	1.88738	8.25837	20.1202	18.5189	3.10639	1.56894	11.8703	15.5262	11.3868	1.95443	3.53332	7.21763	neurogenic_locus_notch_homolog_protein_1-like
LOC121422629	0	2.07038	0	0	0	0	0	0	0	0	0	0	0	0	0	neurogenic_locus_notch_homolog_protein_1-like
LOC121432217	0	3.08795	0	0	0	0	0	0	0.465375	0	0	0	0	1.04805	0	neurogenic_locus_notch_homolog_protein_1-like
LOC121411096	0	1.08512	0	1.47545	0	0	2.51776	0	0.490604	0.927956	0.933659	1.18688	0	0	0	neurogenic_locus_Notch_protein-like
LOC121431148	0	6.9053	0	0	0	0	0	0	0	0	0	0	0	0	0	neurogenic_locus_Notch_protein-like
LOC121406041	0	7.67833	2.67723	0	0	0	6.36276	0	0.495933	0	0	0	1.02964	0	0	neuron_navigator_2-like
LOC121405822	0	0	2.31395	1.28909	0	3.33145	0	0	1.71455	0	0	0	0	0	0	neuron_navigator_2-like
LOC121428446	3.11233	0	2.19677	1.22381	0	1.58138	2.08836	0	0	1.53939	3.0977	3.93783	0	1.83286	0	neuronal_calcium_sensor_1-like
LOC121410924	0	0.851665	0	0	0	0	0.988042	0	0.385055	0	0	0.931531	0	0.867163	0	neuronal_cell_adhesion_molecule-like
LOC121408332	3.09541	3.58063	0	0	0	0	8.308	0	0	9.18609	3.08085	58.7461	0	0	0	neuropeptide_Y_receptor_type_1-like
LOC121419206	0	0	0	1.7022	0	1.09977	0	0	0.566002	0	0	0	0	2.54933	0	neuropeptides_capa_receptor-like
LOC121405992	0	0	0	3.33441	0	0	0	0	0	0	0	0	0	0	0	neuropeptides_capa_receptor-like
LOC121411198	0	0	0	1.89522	0	1.22448	0	0	0	0	1.19929	3.0491	0	0	0	neuropeptides_capa_receptor-like
LOC121409622	0	5.72255	0	3.89051	0	2.51361	0	0	0	2.44686	0	3.1296	0	2.91334	12.3983	neurotrypsin-like
LOC121410293	0	3.85726	0	5.24476	0	0	4.47492	0	0	6.59719	0	0	0	0	20.0568	neurotrypsin-like
LOC121415934	0	14.7954	0	3.35292	0	4.33255	0	0	2.22977	0	8.48687	21.5772	0	0	12.8221	neurotrypsin-like
LOC121415959	2.96176	3.42603	4.18098	4.65841	9.40767	0	7.94928	3.06687	4.64693	0	2.94783	0	6.43188	3.48837	14.8454	neurotrypsin-like
LOC121418359	0	0	0	3.402	0	0	0	0	0	0	0	0	0	0	0	neurotrypsin-like
LOC121431784	2.21662	15.3845	0	3.48642	0	0	0	0	0	4.38544	4.41239	0	0	0	0	neurotrypsin-like
LOC121429487	2.20897	0	3.11831	0	0	2.24476	0	0	0	0	6.59575	0	4.7971	0	6.64332	parkin_coregulated_gene_protein_homolog
LOC121417021	0	1.61057	0	0	0	0	0	0	0	0	0	0	0	0	0	regulating_synaptic_membrane_exocytosis_protein_2-like
LOC121417056	0.917568	0	0	3.608	0	0	2.46273	2.8504	0.959763	0	0.913253	0	1.99263	0	0	regulating_synaptic_membrane_exocytosis_protein_3-like
LOC121415379	0	1.1643	0	0	0	1.02283	0	0	0	0	1.00179	0	4.37162	0	0	semaphorin-1A-like
LOC121415483	0	4.05065	0	2.75386	0	0	0	3.62601	0	0	3.48526	0	0	0	0	semaphorin-1A-like
LOC121411356	0	0	0	1.07777	0	0	3.67828	1.4191	0.716741	0	0	0	0	0	0	semaphorin-5A-like
LOC121415864	0	2.22345	0	0	0	0	0	0	2.01053	0	0	0	2.0871	0	0	survival_motor_neuron_protein-like
LOC121428989	38.2229	17.6858	43.1661	36.0714	32.3761	7.76841	30.7768	63.3271	0	30.2486	22.8259	58.033	83.0065	225.096	7.6635	survival_of_motor_neuron-related-splicing_factor_30-like
LOC121408610	0	3.85391	0	0	0	0	0	0	0	0	1.65799	0	0	0	0	synaptic_vesicle_2-related_protein-like
LOC121422033	3.60187	4.16649	0	0	0	0	0	11.1891	0	0	3.58494	0	0	0	0	synaptic_vesicle_glycoprotein_2B-like
LOC121420942	0	4.55283	0	0	0	0	0	0	0	0	0	0	0	0	3.9456	synaptic_vesicle_glycoprotein_2B-like
LOC121425709	285.947	355.735	248.288	207.056	430.717	271.938	483.654	122.908	28.2166	82.1906	267.419	249.839	98.4187	216.054	20.5526	synaptobrevin_homolog_YKT6-like
LOC121413954	12.2459	7.08278	0	0	0	6.22216	2.05424	0	1.60113	0	0	1.93675	0	1.80292	0	synaptogenesis_protein_syg-1-like
LOC121422529	0	17.8456	7.25935	12.1324	16.3343	5.22574	6.90109	0	0	20.348	20.473	19.5191	11.1675	0	0	synaptogyrin-3-like
LOC121411571	0	0	35.936	0	0	5.1738	0	10.544	0	0	0	0	0	5.99658	0	synaptophysin-like
LOC121431749	1.06558	7.39566	0	0.837997	0	0	0	1.10339	0	0	1.06056	0	0	0	0	synaptopodin_2-like_protein
LOC121418685	0	0	1.42031	0	0	0	0	0	1.0524	0	0	0	1.09248	0	0	synaptosomal-associated_protein_25-like
LOC121426324	2.07195	0	2.92489	0	0	4.21103	0	0	1.08362	0	0	2.6215	0	0	0	synaptosomal-associated_protein_47-like
LOC121406212	8.72054	0	6.15521	13.7161	9.23325	4.43091	29.2572	0	0	0	13.0193	0	4.73448	5.13555	0	synaptotagmin-12-like
LOC121432000	0	0	0	1.25795	0	0	0	0	0	0	0	0	0	0	0	synaptotagmin-15-like
LOC121413911	0	1.74155	0	0	0	0	0	0	0	0	0	0	0	0	0	synaptotagmin-like_protein_4
LOC121416292	0	0	0	2.44218	0	0	0	0	1.62411	0	0	0	0	0	0	5-hydroxytryptamine_receptor_1D-like
LOC121425688	26.1235	21.5847	12.2925	1.95659	1.31711	21.4902	6.6776	6.44063	0	0	27.2388	22.0349	2.70147	0	0	5-hydroxytryptamine_receptor_1D-like
LOC121431011	0	0	8.88063	0	0	0	0	6.5142	0	0	0	0	3.41542	0	0	5-hydroxytryptamine_receptor_1D-like
LOC121409038	0	2.70784	0	0	0	0	0	3.63596	1.8364	3.47347	0	1.48089	0	0	5.86671	5-hydroxytryptamine_receptor_1F-like
LOC121425037	846.955	7.20383	4252.03	0	0	1185.54	8.35738	827.575	0	0	1208.67	2.62646	1077.42	0	0	5-hydroxytryptamine_receptor_1F-like
LOC121429508	11.2775	19.568	0	0	2.98514	22.9204	7.56714	11.6778	1.47451	8.36693	5.61223	7.13433	3.06134	0	0	5-hydroxytryptamine_receptor_2A-like
LOC121409273	0	4.33624	2.64588	0	3.96902	0	2.5153	0	0	1.8541	0	0	0	2.20757	0	5-hydroxytryptamine_receptor_4-like
LOC121426731	0	0	0	2.78047	0	0	9.48939	0	0	0	0	4.47332	0	0	0	5-hydroxytryptamine_receptor_4-like
LOC121422218	0	3.86397	0	0	10.6102	0	4.48271	0	0	0	0	0	0	0	0	5-hydroxytryptamine_receptor_7-like
LOC121423528	6.38636	14.7749	0	0	0	6.48982	17.1409	0	0	0	0	0	0	0	0	neuronal_acetylcholine_receptor_subunit_alpha-10-like
LOC121427616	3.86848	2.23744	2.73048	3.04228	2.04796	3.93115	0	2.00289	0	0	5.77543	2.44726	4.20048	2.27816	0	neuronal_acetylcholine_receptor_subunit_alpha-10-like
LOC121408551	0	0	6.65366	0	0	0	0	0	0	0	0	0	0	0	0	neuronal_acetylcholine_receptor_subunit_alpha-3-like
LOC121419309	0	3.1537	1.92432	0	0	0	0	0	0	0	0	0	1.48016	0	0	neuronal_acetylcholine_receptor_subunit_alpha-7-like
LOC121415698	0	5.10168	0	0	0	0	0	0	0	0	0	5.5801	0	0	0	neuronal_acetylcholine_receptor_subunit_alpha-9-like
LOC121415820	0	29.1108	0	0	0	3.65337	4.82462	0	0	0	0	0	0	0	0	neuronal_acetylcholine_receptor_subunit_alpha-9-like
LOC121415499	0	4.16259	0	0	0	0	0	0	0	0	0	0	3.90733	0	0	neuronal_acetylcholine_receptor_subunit_beta-4-like
LOC121419139	6.37841	18.4457	9.00413	2.50808	13.5068	3.24087	38.5189	0	8.33966	0	12.6968	4.03509	0	15.0251	0	acetylcholine_receptor_subunit_alpha-like_2
LOC121418676	0	1.38042	0	0	0	0	0	0	0	0	0	1.50987	0	0	0	muscarinic_acetylcholine_receptor_M1-like
LOC121425933	9.76461	13.5543	16.5411	0	2.06774	1.98456	5.2416	2.02223	0	5.7956	21.3811	0	0	4.60033	0	muscarinic_acetylcholine_receptor_M2-like
LOC121406537	6.98754	0	0	27.4759	3.69918	0	4.6886	0	5.48165	0	0	8.84086	0	0	0	muscarinic_acetylcholine_receptor_M4-like
LOC121406550	26.0728	26.8088	36.8059	18.2261	9.20192	8.83174	46.6526	56.9962	7.57551	51.5835	23.0669	69.6418	47.1841	3.41208	5.80831	muscarinic_acetylcholine_receptor_M4-like
LOC121411249	13.3035	0	18.78	0	0	0	0	0	0	0	0	0	3.61132	0	0	acetylcholinesterase-like
LOC121411251	10.5196	0	9.90002	0	0	0	0	0	0	6.93744	0	0	0	0	0	acetylcholinesterase-like
LOC121423306	0	0	118.437	3.14195	0	0	0	41.3701	0	0	0	0	21.6905	0	0	acetylcholinesterase-like
LOC121423057	0	2.79909	0	0	0	0	0	0	0	0	2.4084	3.06158	0	0	0	acetylcholinesterase-like
LOC121425084	0	0	0	1.36789	0	0	0	0.900551	0.909678	0	0	0	0	0	0	D(1)_dopamine_receptor-like
LOC121426245	17.5057	53.1557	176.073	15.4878	32.436	8.89462	2.93655	49.8491	6.8665	0	39.2025	19.3801	47.5201	56.7002	4.38725	D(2)_dopamine_receptor_B-like
LOC121419135	17.6921	61.3964	31.219	59.1326	42.1476	4.49468	29.6782	27.48	53.2039	30.6274	8.80446	72.7501	14.4079	26.0473	26.6039	D(2)_dopamine_receptor-like
LOC121425235	3.20919	3.71225	0	0	0	16.3059	0	0	1.67838	0	6.38819	0	0	0	0	dopamine_receptor_1-like
LOC121427391	22.8315	26.4105	56.4029	35.9106	18.1304	5.80034	0	29.5523	5.97036	11.2927	28.4052	21.6654	74.3728	13.4455	17.166	gamma-aminobutyric_acid_receptor-associated_protein
LOC121408331	0	0	0	2.1395	1.44024	0	1.82546	7.04273	0.711411	0	0	0	11.8161	1.60213	0	gamma-aminobutyric_acid_receptor-associated_protein-like_2
LOC121428858	0	2.12712	0	5.78455	0	0	0	0	0	0	0	0	0	0	0	gamma-aminobutyric_acid_type_B_receptor_subunit_1-like
LOC121415635	0	9.35733	0	0	0	8.22033	2.71393	0	0	0	2.01281	0	0	0	0	glutamate_receptor_1-like
LOC121415638	0	0	0	1.58582	0	6.14745	0	0	0	0	0	0	0	0	0	glutamate_receptor_1-like
LOC121415639	4.28847	12.4018	24.2154	0	0	4.35794	0	2.22034	0	0	0	0	0	0	2.14954	glutamate_receptor_1-like
LOC121415634	6.93644	8.02376	13.7086	0	0	4.22928	0	4.30957	0	4.11699	4.14229	1.75524	3.01269	0	0	glutamate_receptor_3-like
LOC121406839	0	0	4.50393	0	0	0	0	0	0	0	0	0	0	0	0	glutamate_receptor_ionotropic,_kainate_2-like
LOC121413234	15.1213	14.8007	26.2722	4.57378	1.23157	8.27416	12.4878	63.8365	0	5.75319	15.0502	23.5471	29.0491	6.84999	0	metabotropic_glutamate_receptor_1-like
LOC121413962	8.45813	6.52266	0	0	0	5.7301	3.78357	0	0	0	5.61223	12.4851	0	3.32068	0	metabotropic_glutamate_receptor_2-like
LOC121410981	1.05999	3.67844	0	0.833604	0	0	1.42249	0	0	0	0	0	0	0	0	metabotropic_glutamate_receptor_3-like
LOC121410982	0	1.83315	0	0	1.67791	0	0	0	0	0	0	0	1.72074	0	0	metabotropic_glutamate_receptor_7-like
Endodermal Markers
LOC121406173	11.9614	0	32.0822	0	0	13.3707	0	4.95437	0	0	19.0482	0	10.3904	0	0	Endo16
LOC121419318	9.62757	5.56837	23.7839	0	0	7.33765	9.69006	0	0	0	9.58229	0	15.6807	0	0	FOXA2
Stem Cell Markers
LOC121408828	0	4.94553	0	0	0	0	11.4749	0	0	0	4.25524	0	0	0	4.28593	nanos2 (protein_nanos-like)
LOC121408762	1.05707	6.11387	0	0	1.11922	0	5.67431	0	2.76421	5.22837	4.2084	6.68721	0	1.24503	3.17907	piwi-like_protein_1
LOC121431753	5.2353	3.02798	0	8.23436	19.4008	0	3.51285	0	5.47605	2.58942	0	6.62387	0	3.08308	7.87239	piwi-like_protein_1
LOC121424246	0	0	0	3.73768	0	0	0	0	0	0	0	0	0	0	0	vasa (probable_ATP-dependent_RNA_helicase_DDX4)
LOC121420310	0	26.6614	16.2682	30.2098	12.2017	0	5.15511	3.97774	2.00902	0	0	34.0218	0	4.52442	0	maelstrom (protein_maelstrom_homolog)
Cell Cycle and Cell Proliferation
LOC121427260	41.074	33.9376	38.6549	7.69089	2.0709	59.6277	7.87441	16.2026	10.2293	3.86963	66.1881	22.2721	38.2278	23.0368	5.88224	cyclin-dependent_kinase_11B-like
LOC121426721	0	0	0	2.22172	1.49559	0	0	0	0	0	0	3.57438	1.53377	0	0	cyclin-dependent_kinase_12-like
LOC121426631	0	1.2447	0	0	1.13929	0	0	2.22842	0.562752	0	0	0	0	0	0	cyclin-dependent_kinase_12-like
LOC121423334	3.41382	1.97448	0	2.68472	3.61453	0	0	1.76749	5.35621	3.37701	0	0	0	4.02081	3.42227	cyclin-dependent_kinase_14-like
LOC121410011	0	1.14658	0	0	1.04948	2.01452	2.66036	0	0.518391	0	1.97308	0	1.07627	2.33488	0.993655	cyclin-dependent_kinase_17-like
LOC121431660	0	7.66462	0	0	0	0	4.44598	0	0	0	3.2974	4.19169	0	0	0	cyclin-dependent_kinase_1-like
LOC121411322	4.71193	13.6264	26.6065	3.70559	12.4724	40.7002	3.16167	26.8354	7.39292	13.9834	9.37954	11.9234	15.3489	5.54973	2.3618	cyclin-dependent_kinase_20-like
LOC447791	0	4.60353	0	0	0	0	0	0	1.04068	0	0	0	0	0	0	cyclin-dependent_kinase_4
LOC121423575	0	4.02679	0	0	7.37154	0	0	0	1.82059	0	0	0	0	0	0	cyclin-dependent_kinase_4_inhibitor_C-like
LOC121426230	0	1.79756	0	7.33248	3.29065	1.57914	8.3416	0	0	0	0	15.729	0	3.66053	0	cyclin-dependent_kinase_5_activator_1-like
LOC121415104	124.968	119.417	0	25.6377	63.2811	110.428	36.4576	0	19.8913	16.1244	156.827	61.8704	5.89968	25.5979	5.44683	cyclin-dependent_kinase_7-like
LOC121428575	0	3.36379	0	0	3.07892	0	0	0	0	0	0	3.67923	0	3.425	0	cyclin-dependent_kinase_9-like
LOC121419122	1.36003	1.57322	0	0	0	0	0	0	0	0	0	0	0	0	0	cyclin-dependent_kinase-like_1
LOC121431955	0	1.38429	0	1.88223	1.26706	2.43217	0	0	0	9.47036	3.57321	0	0	0	4.79864	cyclin-dependent_kinase-like_4
LOC121422417	1.15029	6.65303	0	0.90462	0	3.50678	0	0	0	0	1.14488	0	0	0	1.15314	cyclin-F-like
LOC121423665	0	0	0	2.78688	0	0	0	0	0	0	3.52706	0	0	0	0	cyclin-G-associated_kinase-like
LOC121412352	5.85245	10.1548	2.06541	4.60252	9.2948	0	7.85391	0	5.35638	10.1314	0	3.70235	9.53207	3.44652	7.33367	cyclin-I-like
LOC121427906	2.03034	9.39442	25.7953	6.38685	6.44913	6.18968	27.2469	12.6144	5.30926	18.076	6.06237	10.2754	28.6596	9.56537	0	cyclin-L1-like
LOC121410950	0	6.99773	0	0	0	0	0	12.5283	0	0	0	7.65396	0	0	0	cyclin-Q-like
LOC121410316	0	3.07141	3.74822	0	1.40565	2.69821	0	2.74943	1.38865	10.5063	10.5708	3.35944	5.76613	6.2546	0	cyclin-T2-like
LOC121418372	0	0	0	2.89505	0	0	0	0	0	0	0	0	0	0	0	cyclin-Y-like_protein_1
LOC121419845	0	0	5.58613	0	4.1898	4.02125	0	0	0	0	1.96927	0	0	0	0	cyclin-Y-like_protein_1
LOC121426311	0	3.66933	0	0	0	0	4.2569	3.28467	0	0	0	0	0	0	0	cylicin-2-like
LOC121405827	0	8.86231	6.48911	0	0	0	4.11257	0	0.801366	0	3.05013	1.93868	0	1.80472	9.21637	G1/S-specific_cyclin-D1-like
LOC121408084	0	0	0	2.14482	2.88765	0	0	0	0	0	0	0	5.92272	0	0	G1/S-specific_cyclin-E
LOC121419378	0	5.11048	0	0	0	0	0	0	0	0	0	0	0	0	0	G2/mitotic-specific_cyclin_S13-7-like
LOC121429467	0	8.4693	0	0	0	0	0	0	0	0	0	0	0	0	0	G2/mitotic-specific_cyclin-B3-like
LOC121410158	0	5.27269	0	0	0	0	6.11701	0	0	2.25451	0	2.88357	0	0	0	G2_and_S_phase-expressed_protein_1-like
LOC121418141	0	0	4.39622	0	0	0	0	0	0	0	0	0	0	0	0	DNA_polymerase_alpha_subunit_B-like
LOC121421151	0	2.3338	0	0	0	0	0	0	0	0	4.01611	0	0	0	0	DNA_polymerase_delta_catalytic_subunit-like
LOC121429881	0	6.04155	0	4.10738	0	0	0	0	8.19453	10.3331	15.5948	0	5.67108	0	0	DNA_polymerase_delta_subunit_3-like
LOC121418907	3.5226	0	4.97271	0	7.45942	0	0	0	1.8423	0	0	0	0	0	0	DNA_polymerase_epsilon_subunit_2-like
LOC121428701	0	2.71032	16.5378	1.84262	0	7.14296	6.28864	0	0	4.63554	0	11.8579	0	2.75963	2.34883	DNA_polymerase_epsilon_subunit_3-like
LOC121423997	0	18.3051	11.1694	0	0	0	0	0	0	0	0	0	0	0	0	DNA_polymerase_epsilon_subunit_4-like
LOC121415721	5.22284	12.0831	29.4914	12.3221	8.29486	0	21.027	10.8164	2.73151	5.16653	10.3966	6.60811	5.67108	6.15149	10.4715	DNA_polymerase_iota-like
LOC121415844	0	10.0761	45.087	9.13373	64.5595	8.85177	54.5514	30.066	9.11122	48.8282	5.7798	84.4944	15.7637	112.854	17.4644	DNA_polymerase_iota-like
LOC121413377	56.243	93.9748	48.5197	27.0301	31.0982	43.1831	73.8002	22.6486	1.30732	15.4546	64.6863	44.2777	15.6068	11.0406	0	DNA_polymerase_theta-like
LOC121431754	4.74247	5.48588	10.0421	3.7296	0	12.0482	3.18217	4.91078	1.24014	2.34567	18.8807	6.00033	2.57474	16.7571	9.50842	proliferating_cell_nuclear_antigen-like
LOC121417436	0	9.63478	0	0	1.76377	5.07844	0	1.72495	0	0	3.31599	0	1.80879	5.88606	0	proliferation-associated_protein_2G4-like
Cilia Markers
LOC121408954	6.08298	7.03652	4.29354	0	3.22031	12.363	8.16328	6.29887	1.59068	3.00869	0	3.84819	9.90755	0	6.09803	tektin-1-like
LOC121423108	0	0	5.15469	0	0	0	0	0	0	0	7.2687	0	0	0	3.66056	tektin-4-like
LOC121430708	0	0	4.47421	2.49256	6.71163	6.44163	4.25339	0	0	0	6.30913	0	10.3244	0	0	tektin-B1-like
LOC121425120	0	16.8556	0	20.0539	57.8556	0	0	0	0	0	0	0	0	0	0	cilia-_and_flagella-associated_protein_206-like
LOC121426156	2.50254	11.5793	0	0	0	0	0	0	0	0	0	0	0	0	0	cilia-_and_flagella-associated_protein_221-like
LOC121411688	0	15.7853	0	8.04879	7.22424	0	0	0	0	0	0	12.9492	0	0	0	cilia-_and_flagella-associated_protein_251-like
LOC121429496	4.32834	0	0	3.40392	0	0	0	0	0	0	4.30798	10.9527	4.6998	5.09794	0	cilia-_and_flagella-associated_protein_300-like
LOC121420304	0	5.91489	10.8274	0	0	2.59809	0	0	0	0	2.54465	0	0	0	0	cilia-_and_flagella-associated_protein_45-like
LOC121424906	0.742802	0.85924	2.09716	1.16832	0	0.754835	0	1.53833	0	0.734793	2.95723	0	0	0	0	cilia-_and_flagella-associated_protein_46-like
LOC121422444	4.49155	7.79344	15.8513	0	2.37781	2.28216	3.0138	0	0	8.88625	2.23522	0	2.43851	2.64509	0	cilia-_and_flagella-associated_protein_52-like
LOC121416185	0	2.38965	0	0	0	0	0	0	0	0	0	0	0	0	0	cilia-_and_flagella-associated_protein_53-like
LOC121423609	0	0	0	1.22035	3.286	0	2.08245	0	0	0	0	0	0	3.65536	0	cilia-_and_flagella-associated_protein_57-like
LOC121426561	208.119	242.595	176.276	57.9142	47.4611	190.342	262.106	124.33	46.887	329.4	301.15	311.932	147.756	101.821	56.1708	cilia-_and_flagella-associated_protein_69-like
LOC121419134	2.96176	0	0	3.49381	0	1.50487	0	0	0	0	0	5.62097	0	1.74419	0	cilia-_and_flagella-associated_protein_70-like
LOC121428207	11.3223	7.27618	39.07	11.8722	22.6439	7.67047	40.5183	100.306	0	2.48894	8.76481	19.1004	92.8879	8.8903	6.30573	cilia-_and_flagella-associated_protein_74-like
LOC121429102	84.8502	245.377	310.337	45.4967	61.2537	97.9826	258.791	143.774	36.3077	68.6744	149.709	97.5957	180.077	81.7666	46.3965	cilia-_and_flagella-associated_protein_77-like
LOC121410045	2.22819	0	3.14544	3.50462	4.71838	2.26429	2.9902	0	0	2.20417	2.21771	2.81918	0	0	0	cilia-_and_flagella-associated_protein_97-like
LOC121424926	1538.81	3312.74	3619.79	2121.65	4786.57	1406.51	3937.59	2864.96	165.518	815.375	1811.57	3883.23	1962.59	5710.61	823.482	cilia-_and_flagella-associated_protein_99-like
LOC121424851	2.31899	2.6825	0	0	0	7.06966	0	0	0	0	6.92424	0	0	0	0	ciliary-associated_calcium-binding_coiled-coil_protein_1-like
LOC121407951	0	4.85105	0	0	0	0	0	0	0	0	0	0	0	0	0	ciliogenesis_and_planar_polarity_effector_2-like
LOC121426192	0	5.74475	0	0	0	0	0	0	0	0	0	6.28347	0	0	0	ciliogenesis-associated_TTC17-interacting_protein-like
LOC121418980	0	0	9.51775	0	3.56933	0	0	0	0	3.33478	0	0	0	0	3.37947	33_kDa_inner_dynein_arm_light_chain,_axonemal
LOC121420563	0	3.91848	4.78195	0	0	6.88471	0	0	0	0	0	0	7.3564	0	0	33_kDa_inner_dynein_arm_light_chain,_axonemal
LOC121415243	0	8.05966	6.55712	5.47941	0	7.08034	28.0508	9.61968	18.2197	13.7847	6.93471	2.93849	0	8.20632	2.32824	dynein_assembly_factor_4,_axonemal-like
LOC121419901	0	0	11.1264	0.774809	0	0	0	55.0905	0	0.974604	0	1.24654	46.0006	1.16041	0	dynein_axonemal-associated_protein_1-like
LOC121422823	0.542877	1.25595	0	0	0	1.10334	0	2.24858	0.567842	0.537024	0	0	0.589468	0.639404	0	dynein_beta_chain,_ciliary
LOC121422261	0	5.45445	0	1.64811	0	1.06482	0	0	0.274008	1.55482	0	0	0	0	1.05044	dynein_heavy_chain_1,_axonemal-like
LOC121408397	0.53561	0	0	0.421219	0	0	0	0	0	0	0	0	0	0.630845	0	dynein_heavy_chain_10,_axonemal-like
LOC121408461	0	0	0	0.422456	0	0	0	0	0	0	0	0	0	0	0	dynein_heavy_chain_10,_axonemal-like
LOC121410141	0	0.724592	0	0	0	0	0	0	0	0	0	0	0	0	0	dynein_heavy_chain_12,_axonemal-like
LOC121429563	0	0	1.33335	1.48561	0	0	1.26755	0	0	0.467172	0	0	0	0	0	dynein_heavy_chain_2,_axonemal-like
LOC121410272	0	3.77121	0	0.366268	0	0.473282	2.50005	0.964533	0	0	3.24483	1.17853	0.505708	0.548548	0	dynein_heavy_chain_3,_axonemal-like
LOC121408153	0.890811	1.54568	0	0	0	0.905242	0	0.461213	0	0	0	0	0	0	0.446508	dynein_heavy_chain_5,_axonemal-like
LOC121413891	1.0701	0.618923	0	0	1.13302	0	0	0	0.279828	1.05856	1.5976	0.676964	0	0	0	dynein_heavy_chain_5,_axonemal-like
LOC121413974	142.406	157.042	0	28.3713	67.8503	104.193	117.212	0	14.6472	55.8786	121.421	82.8812	0	84.4223	0.475861	dynein_heavy_chain_5,_axonemal-like
LOC121423875	166.853	151.454	108.762	32.3398	54.5503	189.73	105.297	54.3286	19.0347	45.3548	177.359	157.284	61.0752	196.52	25.5874	dynein_heavy_chain_7,_axonemal-like
LOC121413912	0	0	0	0.358148	0	0.462789	0	0	0.238177	0	0	0	0	0	0	dynein_heavy_chain_8,_axonemal-like
LOC121426935	0.929839	1.0756	0	0	0	1.41735	0	0	0.486299	0	0	0	0	0	0	dynein_heavy_chain_domain-containing_protein_1-like
LOC121415092	0	2.61309	0	0	0	2.29558	0	0	0	0	0	0	4.90571	0	0	dynein_intermediate_chain_2,_ciliary
LOC121422702	0	0	5.57895	0	0	4.01608	5.30361	24.5539	0	0	0	0	0	4.65475	7.92368	dynein_intermediate_chain_3,_ciliary-like
LOC121422099	0	9.7074	0	0	0	4.26393	0	4.34488	1.09723	0	0	2.65443	11.3902	0	2.10317	dynein_intermediate_chain_CFAP94,_axonemal-like
LOC121422197	0	8.99506	0	0	0	0	0	0	0	0	0	9.83859	0	0	0	dynein_light_chain_4,_axonemal-like
LOC121408814	0	14.9615	6.08612	0	4.56481	0	0	0	6.76439	4.26485	8.58212	0	32.7694	0	0	dynein_light_chain_LC6,_flagellar_outer_arm-like
LOC121429729	3.32589	23.0834	0	0	0	0	0	3.44393	0	0	0	0	7.22264	0	0	dynein_light_chain_Tctex-type_protein_2B-like
LOC121410997	8.07865	0	5.70214	4.76495	0	6.15714	0	4.18269	0	1.99789	6.0305	0	4.38599	2.37877	0	dynein_regulatory_complex_protein_11-like
LOC121418796	5.32418	12.3176	0	8.37416	0	0	0	0	0	0	0	0	5.78112	6.27085	0	dynein_regulatory_complex_protein_8-like
LOC121429395	9.11905	10.5485	0	0	0	9.26677	0	0	0	0	0	11.5377	0	0	0	dynein_regulatory_complex_protein_9-like
LOC121422692	71.7435	72.165	61.647	22.0778	79.2643	101.434	121.395	25.8399	0	0	83.8246	59.1993	23.7089	25.7174	0	dynein_regulatory_complex_subunit_3-like
LOC121408058	0	6.0395	11.0555	0	0	0	0	0	1.36529	0	0	3.30293	5.66915	0	0	dynein_regulatory_complex_subunit_4-like
LOC121415314	0	3.16155	0	4.2988	0	0	0	0	0	0	0	0	0	0	0	dynein_regulatory_complex_subunit_6-like
Miscellaneous Growth Factors (and other genes) of Interest
LOC121405581	0	0	1.97406	3.29921	7.40307	1.42105	0	0	0	0	0	0	7.59206	0	0	bone_morphogenetic_protein_1_homolog
LOC121432040	0	5.17445	0	0	2.36812	0	0	2.316	0	0	2.22611	0	2.42857	0	2.24216	bone_morphogenetic_protein_2-like
LOC121431952	0	2.43549	0	0	0	0	0	0	0	0	1.04778	1.33194	0	0	0	bone_morphogenetic_protein_receptor_type-1B-like
LOC121424566	0	2.93595	21.4975	0	0	0	3.40609	2.62817	3.98221	2.51072	0	0	0	0	0	growth/differentiation_factor_8-like
LOC121423913	0	9.72599	20.7711	0	0	0	2.82085	4.3532	0	0	8.36845	0	0	0	0	growth/differentiation_factor_8-like
LOC121426703	14.6339	16.9279	13.772	15.3447	10.3295	0	6.54617	5.05109	0	0	0	0	0	0	0	growth/differentiation_factor_8-like
LOC121425187	0	5.10754	0	0	0	0	5.92542	0	0	0	0	0	0	0	0	insulin-like_growth_factor-binding_protein_7
LOC121431045	0	5.55793	0	0	0	0	0	0	0	0	0	0	0	0	0	insulin-like_growth_factor-binding_protein_complex_acid_labile_subunit
LOC121425598	99.993	42.8398	24.833	29.1249	11.7636	36.6935	18.6374	13.4221	0.968438	12.8223	75.5636	30.4572	6.03193	6.54291	4.64077	fibroblast_growth_factor_receptor-like
LOC121431345	0	9.43431	0	0	0	4.14398	0	0	0	0	0	0	0	0	0	squalene_monooxygenase-like
LOC121428167	3.03488	3.51062	0	1.19336	0	1.54202	2.03639	0	0.79361	0	1.5103	0	1.64767	0	3.04239	squalene_synthase-like
LOC121417258	0.804734	0	0	1.26573	0	0	0	0.833295	0.42087	0	2.40285	0	0.873798	0	0.806726	epidermal_growth_factor_receptor_kinase_substrate_8-like_protein_2
LOC121405695	204.077	223.857	0	38.7394	5.58816	119.782	221.928	0	1.84019	10.4419	99.8077	60.0994	0	47.6582	12.3455	epidermal_growth_factor_receptor-like
