# Supplementary material for: Genetically tractable embryonic cell lines from sea urchins
Source: Research Square preprint supplement (doi:10.21203/rs.3.rs-5665288/v1), 2025-01-15
Supplement: Supplementary file 7 [file a1c7d46f483ab38c4792bb8e.xlsx]

## Sheet: Ovary
Table S10 – Growth and viability of L. variegatus adult cell cultures - Ovary cells
Date	Experiment Day	Media	Dissociation Method	Cell state	Cell Counts (hemocytometer)				Average cell counts	Cells/ml	Total cells	Number cells seeded	Viability % live cells	Pop doubling	Cumulative population doubling
					Ch1	Ch2	Ch3	Ch4
OVARY CELL CULTURE (Ovary 1)
2023-05-09	2	UM+15% FBS	Collagenase	Live	221	217	224	209	217.75	4355000	21775000	5000000	97.6457	2.12144	2.12144
				Red	0	0	0	0	0
				Dead	6	4	7	4	5.25
2023-05-16	9	UM+15% FBS	Collagenase	Live	113	112	116	105	111.5	2230000	11150000	3000000	95.7082	1.89291	4.01435
				Red	0	0	0	0	0
				Dead	5	5	6	4	5
2023-05-23	16	UM+15% FBS	Collagenase	Live	80	67	77	79	75.75	1515000	7575000	3000000	94.0994	1.33551	5.34986
				Red	0	0	0	0	0
				Dead	6	4	2	7	4.75
2023-05-30	23	UM+15% FBS	Collagenase	Live	84	99	96	93	93	1860000	9300000	3000000	98.4127	1.63132	6.98118
				Red	0	0	0	0	0
				Dead	1	1	2	2	1.5
2023-06-06	30	UM+15% FBS	Collagenase	Live	87	78	93	85	85.75	1715000	8575000	3000000	98.5632	1.51429	8.49547
				Red	0	0	0	0	0
				Dead	0	2	1	2	1.25
2023-06-13	37	UM+15% FBS	Collagenase	Live	47	46	71	46	52.5	1050000	5250000	3000000	95.4545	0.806886	9.30236
				Red	0	0	0	0	0
				Dead	2	2	4	2	2.5
2023-06-20	44	UM+15% FBS	Collagenase	Live	59	45	44	66	53.5	2140000	10700000	3000000	95.9641	1.83351	11.1359
				Red	0	0	0	0	0
				Dead	3	1	2	3	2.25
2023-06-27	51	UM+15% FBS	Collagenase	Live	65	54	47	43	52.25	2090000	10450000	3000000	95.8716	1.79942	12.9353
				Red	0	0	0	0	0
				Dead	1	3	3	2	2.25
2023-07-04	58	UM+15% FBS	Collagenase	Live	59	62	60	48	57.25	2290000	11450000	3000000	97.0339	1.93119	14.8665
				Red	0	0	0	0	0
				Dead	1	1	3	2	1.75
2023-07-11	65	UM+15% FBS	Collagenase	Live	56	44	55	58	53.25	2130000	10650000	3000000	95.0893	1.82676	16.6932
				Red	0	0	0	0	0
				Dead	2	3	3	3	2.75
2023-07-18	72	UM+15% FBS	Collagenase	Live	33	28	39	50	37.5	1500000	7500000	3000000	98.0392	1.32116	18.0144
				Red	0	0	0	0	0
				Dead	0	1	1	1	0.75
2023-07-25	79	UM+15% FBS	Collagenase	Live	30	31	32	30	30.75	1230000	6150000	3000000	93.8931	1.03502	19.0494
				Red	0	0	0	0	0
				Dead	2	2	1	3	2
2023-08-01	86	UM+15% FBS	Collagenase	Live	30	26	41	28	31.25	1250000	6250000	3000000	96.1538	1.05828	20.1077
				Red	0	0	0	0	0
				Dead	1	1	2	1	1.25
2023-08-08	93	UM+15% FBS	Collagenase	Live	21	17	29	19	21.5	860000	4300000	3000000	94.5055	0.519073	20.6268
				Red	0	0	0	0	0
				Dead	1	1	3	0	1.25
2023-08-15	100	UM+15% FBS	Collagenase	Live	27	19	25	27	24.5	980000	4900000	3000000	96.0784	0.707408	21.3342
				Red	0	0	0	0	0
				Dead	0	2	1	1	1
2023-08-22	107	UM+15% FBS	Collagenase	Live	21	19	25	19	21	840000	4200000	3000000	95.4545	0.485145	21.8193
				Red	0	0	0	0	0
				Dead	0	1	2	1	1
2023-08-29	114	UM+15% FBS	Collagenase	Live	18	22	24	20	21	840000	4200000	3000000	95.4545	0.485145	22.3045
				Red	0	0	0	0	0
				Dead	2	1	1	0	1
2023-09-05	121	UM+15% FBS	Collagenase	Live	11	20	14	15	15	600000	3000000	3000000	93.75	0	22.3045
				Red	0	0	0	0	0
				Dead	1	0	2	1	1
2023-09-12	128	UM+15% FBS	Collagenase	Live	14	10	13	13	12.5	500000	2500000	3000000	92.5926	0	22.3045
				Red	0	0	0	0	0
				Dead	1	1	1	1	1
2023-09-19	135	UM+15% FBS	Collagenase	Live	13	10	13	15	12.75	510000	2550000	2500000	87.931	0.0285526	22.333
				Red	0	0	0	0	0
				Dead	3	1	1	2	1.75
OVARY CELL CULTURE (Ovary 2)
2023-05-09	2	UM+15% FBS	Mechanical	Live	186	179	185	196	186.5	3730000	3730000	500000	97.5163	2.89749	2.89749
				Red	0	0	0	0	0
				Dead	6	5	4	4	4.75
2023-05-16	9	UM+15% FBS	Mechanical	Live	147	178	184	155	166	3320000	1660000	500000	98.0798	1.73018	4.62767
				Red	0	0	0	0	0
				Dead	3	4	4	2	3.25
2023-05-23	16	UM+15% FBS	Mechanical	Live	148	114	122	131	128.75	2575000	1287500	500000	98.0952	1.36378	5.99145
				Red	0	0	0	0	0
				Dead	1	3	1	5	2.5
2023-05-30	23	UM+15% FBS	Mechanical	Live	182	168	174	181	176.25	3525000	1762500	500000	98.878	1.81657	7.80802
				Red	0	0	0	0	0
				Dead	3	2	2	1	2
2023-06-06	30	UM+15% FBS	Mechanical	Live	170	182	185	179	179	3580000	1790000	500000	98.6226	1.83889	9.64691
				Red	0	0	0	0	0
				Dead	3	3	2	2	2.5
2023-06-13	37	UM+15% FBS	Mechanical	Live	194	202	210	197	200.75	4015000	2007500	500000	98.6486	2.00424	11.6511
				Red	0	0	0	0	0
				Dead	3	3	2	3	2.75
2023-06-20	44	UM+15% FBS	Mechanical	Live	210	202	198	221	207.75	4155000	2077500	500000	98.8109	2.05366	13.7048
				Red	0	0	0	0	0
				Dead	2	3	3	2	2.5
2023-06-27	51	UM+15% FBS	Mechanical	Live	190	205	219	189	200.75	4015000	2007500	500000	98.77	2.00424	15.709
				Red	0	0	0	0	0
				Dead	2	2	2	4	2.5
2023-07-04	58	UM+15% FBS	Mechanical	Live	183	203	202	211	199.75	3995000	1997500	500000	99.0087	1.99704	17.7061
				Red	0	0	0	0	0
				Dead	2	1	3	2	2
2023-07-11	65	UM+15% FBS	Mechanical	Live	216	196	189	201	200.5	4010000	2005000	500000	98.647	2.00244	19.7085
				Red	0	0	0	0	0
				Dead	3	4	3	1	2.75
2023-07-18	72	UM+15% FBS	Mechanical	Live	44	46	53	51	48.5	970000	970000	500000	97.9798	0.955502	20.664
				Red	0	0	0	0	0
				Dead	1	0	1	2	1
2023-07-25	79	UM+15% FBS	Mechanical	Live	137	117	142	131	131.75	2635000	7905000	970000	97.0534	3.02495	23.689
				Red	0	0	0	0	0
				Dead	3	5	4	4	4
2023-08-01	86	UM+15% FBS	Mechanical	Live	86	123	118	113	110	2200000	11000000	3000000	98.2143	1.87338	25.5623
				Red	0	0	0	0	0
				Dead	1	2	3	2	2
2023-08-08	93	UM+15% FBS	Mechanical	Live	70	64	82	82	74.5	1490000	7450000	3000000	94.9045	1.31152	26.8739
				Red	0	0	0	0	0
				Dead	4	3	4	5	4
2023-08-15	100	UM+15% FBS	Mechanical	Live	68	83	72	79	75.5	1510000	7550000	3000000	94.6708	1.33074	28.2046
				Red	0	0	0	0	0
				Dead	4	4	6	3	4.25
2023-08-22	107	UM+15% FBS	Mechanical	Live	57	82	79	84	75.5	1510000	7550000	3000000	84.8315	1.33074	29.5353
				Red	0	0	0	0	0
				Dead	18	13	10	13	13.5
2023-08-29	114	UM+15% FBS	Mechanical	Live	51	56	48	46	50.25	1005000	5025000	3000000	87.013	0.743729	30.2791
				Red	0	0	0	0	0
				Dead	8	8	5	9	7.5
2023-09-05	121	UM+15% FBS	Mechanical	Live	47	66	76	78	66.75	1335000	6675000	3000000	92.069	1.15314	31.4322
				Red	0	0	0	0	0
				Dead	6	5	4	8	5.75
2023-09-12	128	UM+15% FBS	Mechanical	Live	29	31	25	30	28.75	575000	2875000	3000000	63.1868	0	31.4322
				Red	0	0	0	0	0
				Dead	17	22	15	13	16.75
2023-09-19	135	UM+15% FBS	Mechanical	Live	34	31	39	29	33.25	665000	3325000	2875000	78.2353	0.209671	31.6419
				Red	0	0	0	0	0
				Dead	10	9	5	13	9.25
OVARY CELL CULTUE (Ovary 3)
2023-03-21	6	UM+15% FBS	Collagenase	Live	102	106	110	109	106.75	2135000	1067500	500000	98.1609	1.0936	1.0936
				Red	0	0	0	0	0
				Dead	1	3	2	2	2
2023-03-28	13	UM+15% FBS	Collagenase	Live	219	222	206	215	215.5	4310000	2155000	1080000	98.8532	0.996078	2.08968
				Red	0	0	0	0	0
				Dead	3	2	4	1	2.5
2023-04-04	20	UM+15% FBS	Col+ Squash	Live	94	100	112	134	110	2200000	11000000	5000000	98.6547	1.13684	3.22652
				Red	0	0	0	0	0
				Dead	1	2	2	1	1.5
2023-04-11	27	UM+15% FBS	Col+ Squash	Live	136	143	139	157	143.75	2875000	14375000	3000000	98.2906	2.25922	5.48574
				Red	0	0	0	0	0
				Dead	2	3	3	2	2.5
2023-04-18	34	UM+15% FBS	Col+ Squash	Live	68	62	69	76	68.75	1375000	6875000	3000000	96.831	1.1957	6.68144
				Red	0	1	0	1	0.5
				Dead	2	4	1	2	2.25
2023-04-25	41	UM+15% FBS	Col+ Squash	Live	34	30	36	39	34.75	695000	3475000	3000000	95.8621	0.211927	6.89337
				Red	0	0	0	0	0
				Dead	1	2	1	2	1.5
2023-05-02	48	UM+15% FBS	Col+ Squash	Live	51	44	60	64	54.75	1095000	5475000	3000000	96.4758	0.867393	7.76076
				Red	0	0	0	0	0
				Dead	1	3	2	2	2
2023-05-09	55	UM+15% FBS	Col+ Squash	Live	65	41	44	50	50	1000000	5000000	3000000	96.1538	0.736538	8.4973
				Red	0	0	0	0	0
				Dead	3	2	2	1	2
2023-05-16	62	UM+15% FBS	Col+ Squash	Live	37	36	43	25	35.25	705000	3525000	3000000	95.2703	0.232526	8.72982
				Red	0	0	0	0	0
				Dead	2	2	1	2	1.75
2023-05-23	69	UM+15% FBS	Col+ Squash	Live	26	27	24	20	24.25	485000	2425000	3000000	93.2692	0	8.72982
				Red	0	0	1	0	0.25
				Dead	2	1	2	2	1.75
2023-05-30	76	UM+15% FBS	Col+ Squash	Live	60	53	42	29	46	920000	4600000	2425000	97.3545	0.923113	9.65294
				Red	0	0	0	0	0
				Dead	1	1	1	2	1.25
2023-06-06	83	UM+15% FBS	Col+ Squash	Live	39	20	15	20	23.5	470000	2350000	3000000	96.9072	0	9.65294
				Red	0	0	0	0	0
				Dead	1	1	1	0	0.75
2023-06-13	90	UM+15% FBS	Col+ Squash	Live	29	30	31	34	31	620000	3100000	2350000	95.3846	0.399376	10.0523
				Red	0	0	0	0	0
				Dead	2	1	1	2	1.5
2023-06-20	97	UM+15% FBS	Col+ Squash	Live	26	21	22	23	23	460000	2300000	3000000	94.8454	0	10.0523
				Red	0	0	0	0	0
				Dead	1	2	1	1	1.25
2023-06-27	104	UM+15% FBS	Col+ Squash	Live	25	23	19	22	22.25	445000	2225000	2300000	97.8022	0	10.0523
				Red	0	0	0	0	0
				Dead	0	1	1	0	0.5
2023-07-04	111	UM+15% FBS	Col+ Squash	Live	20	18	21	20	19.75	395000	1975000	2225000	94.0476	0	10.0523
				Red	0	0	0	0	0
				Dead	1	1	1	2	1.25
2023-07-11	118	UM+15% FBS	Col+ Squash	Live	17	15	11	13	14	280000	1400000	1975000	94.9153	0	10.0523
				Red	0	0	0	0	0
				Dead	0	2	0	1	0.75
2023-07-18	125	UM+15% FBS	Col+ Squash	Live	10	10	13	14	11.75	235000	1175000	1400000	94	0	10.0523
				Red	0	0	0	0	0
				Dead	1	0	1	1	0.75
2023-07-25	132	UM+15% FBS	Col+ Squash	Live	30	26	27	19	25.5	510000	2550000	1175000	93.578	1.11719	11.1695
				Red	0	0	0	0	0
				Dead	2	2	1	2	1.75
2023-08-01	139	UM+15% FBS	Col+ Squash	Live	8	9	12	12	10.25	205000	1025000	2550000	97.619	0	11.1695
				Red	0	0	0	0	0
				Dead	0	1	0	0	0.25
2023-08-08	146	UM+15% FBS	Col+ Squash	Live	9	6	5	10	7.5	150000	750000	1025000	96.7742	0	11.1695
				Red	0	0	0	0	0
				Dead	1	0	0	0	0.25
2023-08-15	153	UM+15% FBS	Col+ Squash	Live	6	3	8	6	5.75	115000	575000	750000	92	0	11.1695
				Red	0	0	0	0	0
				Dead	0	1	0	1	0.5
OVARY - Lv_2 - Flask #1 (Ovary 4)
April 12/24	0	UM+15% FBS	Collagenase	Live cells	341	415	389	350	373.75	7475000	7475000		77.5013	#NUM!	0
			in HBSS	Dead	110	99	104	121	108.5
				Red	0	0	0	0	0
April 15/24	3	UM+15% FBS	Collagenase	Live	64	79	89	77	77.25	1545000	6180000	3737500	87.0423	0.725112	0.725112
			in HBSS	Dead	10	17	10	9	11.5
				Red	0	0	0	0	0
April 19/24	7	UM+15% FBS	Collagenase	Live	36	22	29	20	26.75	535000	2675000	6180000	83.5938	-1.20737	0.725112
			in HBSS	Dead	4	5	4	8	5.25
				Red	0	0	0	0	0
April 26/24	14	UM+15% FBS	Collagenase	Live	31	28	22	32	28.25	565000	2825000	2675000	81.8841	0.0786663	0.803778
			in HBSS	Dead	9	8	3	5	6.25
				Red	0	0	0	0	0
May 3/24	21	UM+15% FBS	Collagenase	Live	20	19	24	22	21.25	425000	2125000	2825000	88.5417	-0.41055	0.803778
			in HBSS	Dead	1	3	4	3	2.75
				Red	0	0	0	0	0
May 10/24	28	UM+15% FBS	Collagenase	Live	13	15	13	18	14.75	295000	1475000	2125000	86.7647	-0.526442	0.803778
			in HBSS	Dead	4	2	1	2	2.25
				Red	0	0	0	0	0
May 17/24	35	UM+15% FBS	Collagenase	Live	2	3	2	1	2	40000	200000	1475000	88.8889	-2.88097	0.803778
			in HBSS	Dead	0	0	1	0	0.25
				Red	0	0	0	0	0
*Flask was discarded on May 20
OVARY - Lv_6 (Ovary 5)
May 29/24	0	UM+5% FBS	Collagenase	Live cells	329	341	305	321	324	6480000	6480000	3240000	96.861	0.99942	0
				Dead	11	14	8	9	10.5
				Red	0	0	0	0	0
June 4/24	6	UM+5% FBS	Collagenase	Live	98	92	111	94	98.75	1975000	9875000	3000000	90.1826	1.71782	1.71782
				Dead	9	10	11	13	10.75
				Red	0	0	0	0	0
June 11/24	13	UM+5% FBS	Collagenase	Live	61	76	82	74	73.25	1465000	7325000	3000000	93.9103	1.28712	3.00494
				Dead	5	4	6	4	4.75
				Red	0	0	0	0	0
June 18/24	20	UM+5% FBS	Collagenase	Live	68	78	74	64	71	1420000	7100000	3000000	94.9833	1.24214	4.24707
				Dead	3	4	2	6	3.75
				Red	0	0	0	0	0
June 25/24	27	UM+5% FBS	Collagenase	Live	54	52	63	59	57	1140000	5700000	3000000	90.1186	0.925462	5.17254
				Dead	6	5	6	8	6.25
				Red	0	0	0	0	0
July 2/24	34	UM+5% FBS	Collagenase	Live	60	59	68	70	64.25	1285000	6425000	3000000	88.9273	1.0981	6.27063
				Dead	12	10	7	3	8
				Red	0	0	0	0	0
July 9/24	41	UM+5% FBS	Collagenase	Live					#DIV/0!	#DIV/0!	#DIV/0!	3000000	#DIV/0!	#DIV/0!	6.27
				Dead					#DIV/0!
				Red	0	0	0	0	0
July 16/24	48	UM+5% FBS	Collagenase	Live	86	81	79	87	83.25	1665000	8325000	3000000	76.3761	1.47163	7.74163
				Dead	28	30	27	18	25.75
				Red	0	0	0	0	0
July 23/24	55	UM+5% FBS	Collagenase	Live	56	52	65	64	59.25	1185000	5925000	3000000	84.0426	0.981283	8.72292
				Dead	8	12	12	13	11.25
				Red	0	0	0	0	0
July 30/24	62	UM+5% FBS	Collagenase	Live	56	65	42	52	53.75	1075000	5375000	3000000	85.6574	0.840814	9.56373
				Dead	8	7	10	11	9
				Red	0	0	0	0	0
Aug 6/24	69	UM+5% FBS	Collagenase	Live	47	43	44	35	42.25	845000	4225000	3000000	74.7788	0.493702	10.0574
				Dead	15	8	14	20	14.25
				Red	0	0	0	0	0
OVARY - Lv_7 Flask 1 (Ovary 6)
May 29/24	0	UM+5% FBS	Collagenase	Live cells	402	383	370	399	388.5	7770000	7770000		97.1857	#NUM!	0
				Dead	10	9	14	12	11.25
				Red	0	0	0	0	0
June 4/24	6	UM+5% FBS	Collagenase	Live	140	173	176	162	162.75	3255000	16275000	7770000	86.3395	1.06605	1.06605
				Dead	17	25	29	32	25.75
				Red	0	0	0	0	0
June 11/24	13	UM+5% FBS	Collagenase	Live	155	174	169	173	167.75	3355000	16775000	3000000	87.5979	2.48184	3.54789
				Dead	28	22	26	19	23.75
				Red	0	0	0	0	0
June 18/24	20	UM+5% FBS	Collagenase	Live	132	126	142	139	134.75	2695000	13475000	3000000	83.3076	2.16599	5.71388
				Dead	24	28	26	30	27
				Red	0	0	0	0	0
June 25/24	27	UM+5% FBS	Collagenase	Live	117	120	131	126	123.5	2470000	12350000	3000000	83.871	2.04029	7.75417
				Dead	26	29	21	19	23.75
				Red	0	0	0	0	0
July 2/24	34	UM+5% FBS	Collagenase	Live	99	105	112	110	106.5	2130000	10650000	3000000	82.3985	1.82676	9.58093
				Dead	23	21	27	20	22.75
				Red	0	0	0	0	0
July 9/24	41	UM+5% FBS	Collagenase	Live					#DIV/0!	#DIV/0!	#DIV/0!	3000000	#DIV/0!	#DIV/0!	9.58
				Dead					#DIV/0!
				Red	0	0	0	0	0
July 16/24	48	UM+5% FBS	Collagenase	Live	44	49	41	48	45.5	910000	4550000	3000000	83.4862	0.600555	10.1806
				Dead	7	9	10	10	9
				Red	0	0	0	0	0
July 23/24	55	UM+5% FBS	Collagenase	Live	42	54	66	74	59	1180000	5900000	3000000	89.0566	0.975186	11.1557
				Dead	9	4	9	7	7.25
				Red	0	0	0	0	0
July 30/24	62	UM+5% FBS	Collagenase	Live	68	52	54	51	56.25	1125000	5625000	3000000	87.8906	0.906364	12.0621
				Dead	10	6	8	7	7.75
				Red	0	0	0	0	0
Aug 6/24	69	UM+5% FBS	Collagenase	Live	40	37	31	46	38.5	770000	3850000	3000000	81.9149	0.359687	12.4218
				Dead	7	8	9	10	8.5
				Red	0	0	0	0	0
OVARY - Lv_7 Flask 2 (Ovary 7)
May 29/24	0	UM+10% FBS	Collagenase	Live cells	402	383	370	399	388.5	7770000	7770000	3885000	97.1857	0.99942	0
				Dead	10	9	14	12	11.25
				Red	0	0	0	0	0
June 4/24	6	UM+10% FBS	Collagenase	Live cells	198	175	180	176	182.25	3645000	18225000	3000000	86.7857	2.60137	2.60137
				Dead	23	32	35	21	27.75
				Red	0	0	0	0	0
June 11/24	13	UM+10% FBS	Collagenase	Live cells	84	107	89	107	96.75	1935000	9675000	3000000	89.7912	1.68832	4.28969
				Dead	10	10	11	13	11
				Red	0	0	0	0	0
June 18/24	20	UM+10% FBS	Collagenase	Live cells	120	115	122	109	116.5	2330000	11650000	3000000	91.0156	1.95616	6.24585
				Dead	10	12	10	14	11.5
				Red	0	0	0	0	0
June 25/24	27	UM+10% FBS	Collagenase	Live cells	116	107	118	123	116	2320000	11600000	3000000	88.0455	1.94996	8.19581
				Dead	16	15	20	12	15.75
				Red	0	0	0	0	0
July 2/24	34	UM+10% FBS	Collagenase	Live cells	103	106	97	99	101.25	2025000	10125000	3000000	81.3253	1.75387	9.94968
				Dead	26	22	24	21	23.25
				Red	0	0	0	0	0
July 9/24	41	UM+10% FBS	Collagenase	Live cells					#DIV/0!	#DIV/0!	#DIV/0!	3000000	#DIV/0!	#DIV/0!	9.95
				Dead					#DIV/0!
				Red	0	0	0	0	0
July 16/24	48	UM+10% FBS	Collagenase	Live cells	88	84	79	74	81.25	1625000	8125000	3000000	76.8322	1.43657	11.3866
				Dead	21	25	24	28	24.5
				Red	0	0	0	0	0
July 23/24	55	UM+10% FBS	Collagenase	Live cells	69	71	68	72	70	1400000	7000000	3000000	80	1.22168	12.6083
				Dead	14	28	13	15	17.5
				Red	0	0	0	0	0
July 30/24	62	UM+10% FBS	Collagenase	Live cells	51	34	36	32	38.25	765000	3825000	3000000	80.1047	0.350294	12.9585
				Dead	9	10	8	11	9.5
				Red	0	0	0	0	0
Aug 6/24	69	UM+10% FBS	Collagenase	Live cells	35	33	28	25	30.25	605000	3025000	3000000	84.0278	0.0119657	12.9705
				Dead	6	10	4	3	5.75
				Red	0	0	0	0	0
Aug 13/24	76	UM+10% FBS	Collagenase	Live	29	27	34	24	28.5	570000	2850000	3025000	85.7143	-0.0859233	12.9705
				Dead	4	6	5	4	4.75
				Red	0	0	0	0	0
Aug 20/24	83	UM+10% FBS	Collagenase	Live	18	19	20	16	18.25	365000	1825000	2850000	84.8837	-0.642692	12.9705
				Dead	4	2	3	4	3.25
				Red	0	0	0	0	0
Sep 11/24	105	UM+10% FBS	Collagenase	Live	30	47	51	37	41.25	825000	4125000	1825000	87.766	1.17581	14.1463
				Dead	4	6	7	6	5.75
				Red	0	0	0	0	0
Sep 18/24	112	UM+10% FBS	Collagenase	Live	32	42	39	46	39.75	795000	3180000	4125000	79.8995	-0.375149	14.1463
				Dead	4	12	11	13	10
				Red	0	0	0	0	0
Sep 25/24	119	UM+10% FBS	Collagenase	Live	37	15	19	21	23	460000	2300000	1400000	92	0.715791	14.8621
				Dead	2	1	2	3	2
				Red	0	0	0	0	0
Oct 2/24	126	UM+10% FBS	Collagenase	Live	44	46	40	42	43	860000	4300000	2300000	95.5556	0.902179	15.7643
				Dead	2	3	2	1	2
				Red	0	0	0	0	0
Oct 9/24	133	UM+10% FBS	Collagenase	Live	40	40	49	61	47.5	950000	4750000	4300000	76	0.143508	15.9078
				Dead	18	9	18	15	15
				Red	0	0	0	0	0
Oct 16/24	140	UM+10% FBS	Collagenase	Live	68	46	60	40	53.5	1070000	5350000	4750000	68.3706	0.171512	16.0793
				Dead	18	24	27	30	24.75
				Red	0	0	0	0	0
Oct 23/24	147	UM+10% FBS	Collagenase	Live	40	65	47	63	53.75	1075000	5375000	5350000	74.1379	0.00672196	16.086
				Dead	11	16	22	26	18.75
				Red	0	0	0	0	0
Oct 30/24	153	UM+10% FBS	Collagenase	Live	24	26	30	32	28	560000	2800000	5375000	71.7949	-0.940292	16.086
				Dead	7	11	8	18	11
				Red	0	0	0	0	0
Nov 6/24	160	UM+10% FBS	Collagenase	Live	50	41	46	44	45.25	905000	4525000	2800000	83.4101	0.692089	16.7781
				Dead	6	13	8	9	9
				Red	0	0	0	0	0

## Sheet: Muscle
Table S10 – Growth and viability of L. variegatus adult cell cultures - Muscle cells (from Aristotle's lantern)
Date	Experiment Day	Media	Dissociation Method	Cell state	Cell Counts (hemocytometer)				Average cell counts	Cells/ml	Total cells	Number cells seeded	Viability % live cells	Pop doubling	Cumulative population doubling
					Ch1	Ch2	Ch3	Ch4
MUSCLE CELL CULTURE (Muscle 1)
2023-05-09	2	UM+15% FBS	Collagenase	Live	66	88	103	101	89.5	1790000	3580000	3000000	95.9786	0.254849	0.254849
				Red	0	0	0	0	0
				Dead	2	3	5	5	3.75
2023-05-16	9	UM+15% FBS	Collagenase	Live	62	87	81	89	79.75	1595000	3190000	3580000	96.3746	0	0.254849
				Red	0	0	0	0	0
				Dead	3	2	3	4	3
2023-05-23	16	UM+15% FBS	Collagenase	Live	50	36	48	47	45.25	905000	1810000	3190000	93.7824	0	0.254849
				Red	0	0	0	0	0
				Dead	3	5	2	2	3
2023-05-30	23	UM+15% FBS	Collagenase	Live	46	52	48	53	49.75	995000	1990000	1810000	94.7619	0.136699	0.391548
				Red	0	0	0	0	0
				Dead	3	4	2	2	2.75
2023-06-06	30	UM+15% FBS	Collagenase	Live	34	26	24	40	31	620000	1240000	1990000	92.5373	0	0.391548
				Red	0	0	0	0	0
				Dead	2	4	2	2	2.5
2023-06-13	37	UM+15% FBS	Collagenase	Live	47	42	48	46	45.75	915000	1830000	1240000	93.8462	0.561178	0.952726
				Red	0	0	0	0	0
				Dead	2	5	3	2	3
2023-06-20	44	UM+15% FBS	Collagenase	Live	31	35	31	37	33.5	670000	1340000	1830000	95.0355	0	0.952726
				Red	0	0	0	0	0
				Dead	1	2	2	2	1.75
2023-06-27	51	UM+15% FBS	Collagenase	Live	41	37	36	43	39.25	785000	1570000	1340000	95.7317	0.228399	1.18112
				Red	0	0	0	0	0
				Dead	2	1	1	3	1.75
2023-07-04	58	UM+15% FBS	Collagenase	Live	39	28	48	34	37.25	745000	1490000	1570000	96.129	0	1.18112
				Red	0	0	0	0	0
				Dead	1	2	1	2	1.5
2023-07-11	65	UM+15% FBS	Collagenase	Live	22	19	18	14	18.25	365000	730000	1490000	94.8052	0	1.18112
				Red	0	0	0	0	0
				Dead	1	1	2	0	1
2023-07-18	72	UM+15% FBS	Collagenase	Live	14	11	17	21	15.75	315000	630000	730000	91.3043	0	1.18112
				Red	0	0	0	0	0
				Dead	1	1	2	2	1.5
2023-07-25	79	UM+15% FBS	Collagenase	Live	21	19	16	13	17.25	345000	690000	630000	93.2432	0.131168	1.31229
				Red	0	0	0	0	0
				Dead	1	1	2	1	1.25
MUSCLE CELL CULTURE - Lv_2 (Muscle 2)
April 12/24	0	UM+15% FBS	Collagenase	Live cells	114	134	121	104	118.25	2365000	2365000		89.0772	#NUM!	0
			in HBSS	Dead	18	11	13	16	14.5
				Red	0	0	0	0	0
April 15/24	3	UM+15% FBS	Collagenase	Live	14	23	20	23	20	400000	2000000	2365000	90.9091	-0.2417	0
			in HBSS	Dead	2	2	1	3	2
				Red	0	0	0	0	0
April 19/24	7	UM+15% FBS	Collagenase	Live	64	70	81	67	70.5	1410000	7050000	2000000	93.6877	1.81657	1.81657
			in HBSS	Dead	4	6	4	5	4.75
				Red	0	0	0	0	0
April 26/24	14	UM+15% FBS	Collagenase	Live	84	56	42	55	59.25	1185000	5925000	7050000	93.6759	-0.250663	1.81657
			in HBSS	Dead	6	3	3	4	4
				Red	0	0	0	0	0
May 3/24	21	UM+15% FBS	Collagenase	Live	36	37	24	21	29.5	590000	2950000	5925000	90.7692	-1.00552	1.81657
			in HBSS	Dead	3	2	2	5	3
				Red	0	0	0	0	0
May 10/24	28	UM+15% FBS	Collagenase	Live	20	13	12	18	15.75	315000	1575000	2950000	88.7324	-0.904838	1.81657
			in HBSS	Dead	2	2	1	3	2
				Red	0	0	0	0	0
May 17/24	35	UM+15% FBS	Collagenase	Live	1	3	4	5	3.25	65000	325000	1575000	92.8571	-2.27552	1.81657
			in HBSS	Dead	0	0	0	1	0.25
				Red	0	0	0	0	0
*Flask was discarded on May 20
MUSCLE CELL CULTURE - Lv_6 (Muscle 3)
May 29/24	0	UM+5% FBS	Collagenase	Live cells	39	42	39	40	40	800000	800000	400000	100	0.99942	0
				Dead	0	0	0	0	0
				Red	0	0	0	0	0
June 4/24	6	UM+5% FBS	Collagenase	Live cells	19	18	23	21	20.25	405000	810000	800000	94.186	0.0179115	0.0179115
				Dead	0	2	1	2	1.25
				Red	0	0	0	0	0
June 11/24	13	UM+5% FBS	Collagenase	Live cells	46	49	63	64	55.5	1110000	2220000	810000	95.6897	1.45372	1.47163
				Dead	2	2	4	2	2.5
				Red	0	0	0	0	0
June 18/24	20	UM+5% FBS	Collagenase	Live cells	38	32	35	42	36.75	735000	1470000	2220000	92.4528	-0.594398	1.47163
				Dead	3	4	2	3	3
				Red	0	0	0	0	0
June 25/24	27	UM+5% FBS	Collagenase	Live cells	30	35	32	37	33.5	670000	1340000	1470000	91.1565	-0.133506	1.47163
				Dead	5	2	4	2	3.25
				Red	0	0	0	0	0
July 2/24	34	UM+5% FBS	Collagenase	Live cells	21	17	16	17	17.75	355000	710000	1340000	86.5854	-0.91581	1.47163
				Dead	2	2	3	4	2.75
				Red	0	0	0	0	0
MUSCLE CELL CULTURE - Lv_6 relicate flask (Muscle 4)
May 29/24	0	UM+10% FBS	Collagenase	Live cells	39	42	39	40	40	800000	800000	400000	100	0.99942	0
				Dead	0	0	0	0	0
				Red	0	0	0	0	0
June 4/24	6	UM+10% FBS	Collagenase	Live cells	29	23	28	27	26.75	535000	1070000	800000	94.6903	0.419295	0.419295
				Dead	1	2	2	1	1.5
				Red	0	0	0	0	0
June 11/24	13	UM+10% FBS	Collagenase	Live cells	41	43	47	39	42.5	850000	1700000	1070000	95.5056	0.667536	1.08683
				Dead	2	1	3	2	2
				Red	0	0	0	0	0
June 18/24	20	UM+10% FBS	Collagenase	Live cells	40	32	39	42	38.25	765000	1530000	1700000	92.7273	-0.151915	1.08683
				Dead	3	3	4	2	3
				Red	0	0	0	0	0
June 25/24	27	UM+10% FBS	Collagenase	Live cells	33	37	34	31	33.75	675000	1350000	1530000	91.8367	-0.180467	1.08683
				Dead	4	3	3	2	3
				Red	0	0	0	0	0
July 2/24	34	UM+10% FBS	Collagenase	Live cells	27	24	25	22	24.5	490000	980000	1350000	87.5	-0.461838	1.08683
				Dead	3	2	4	5	3.5
				Red	0	0	0	0	0

## Sheet: Nerve
Table S10 – Growth and viability of L. variegatus adult cell cultures - Radial nerve cells
Date	Experiment Day	Media	Dissociation Method	Cell state	Cell Counts (hemocytometer)				Average cell counts	Cells/ml	Total Cells	Number cells seeded	Viability % live cells	Pop doubling	Cumulative population doubling
					Ch1	Ch2	Ch3	Ch4
RADIAL NERVE CORD CELL CULTURE (Nerve 1)
2023-05-09	2	UM+15% FBS	Collagenase	Live	53	65	64	64	61.5	1230000	2460000	3000000	96.0938	0	0
				Red	0	0	0	0	0
				Dead	0	3	4	3	2.5
2023-05-16	9	UM+15% FBS	Collagenase	Live	67	69	63	74	68.25	1365000	2730000	2460000	96.8085	0.150155	0.150155
				Red	0	0	0	0	0
				Dead	1	1	4	3	2.25
2023-05-23	16	UM+15% FBS	Collagenase	Live	62	73	79	64	69.5	1390000	2780000	2730000	96.5278	0.0261687	0.176324
				Red	0	0	0	0	0
				Dead	4	3	2	1	2.5
2023-05-30	23	UM+15% FBS	Collagenase	Live	77	73	71	76	74.25	1485000	2970000	2780000	94.586	0.0953227	0.271647
				Red	0	0	0	0	0
				Dead	4	5	3	5	4.25
2023-06-06	30	UM+15% FBS	Collagenase	Live	18	36	30	29	28.25	565000	1130000	2970000	95.7627	0	0.271647
				Red	0	0	0	0	0
				Dead	1	1	2	1	1.25
2023-06-13	37	UM+15% FBS	Collagenase	Live	28	37	30	29	31	620000	1240000	1130000	93.2331	0.13394	0.405586
				Red	0	0	0	0	0
				Dead	2	4	1	2	2.25
2023-06-20	44	UM+15% FBS	Collagenase	Live	22	20	28	23	23.25	465000	930000	1240000	95.8763	0	0.405586
				Red	0	0	0	0	0
				Dead	1	1	2	0	1
2023-06-27	51	UM+15% FBS	Collagenase	Live	20	17	23	19	19.75	395000	790000	930000	95.1807	0	0.405586
				Red	0	0	0	0	0
				Dead	1	0	1	2	1
2023-07-04	58	UM+15% FBS	Collagenase	Live	25	29	23	30	26.75	535000	1070000	790000	95.5357	0.437432	0.843019
				Red	0	0	0	0	0
				Dead	0	2	2	1	1.25
2023-07-11	65	UM+15% FBS	Collagenase	Live	40	32	36	35	35.75	715000	1430000	1070000	94.0789	0.418162	1.26118
				Red	0	0	0	0	0
				Dead	2	3	3	1	2.25
2023-07-18	72	UM+15% FBS	Collagenase	Live	15	21	17	19	18	360000	720000	1430000	92.3077	0	1.26118
				Red	0	0	0	0	0
				Dead	2	1	1	2	1.5
2023-07-25	79	UM+15% FBS	Collagenase	Live	14	11	14	20	14.75	295000	590000	720000	90.7692	0	1.26118	July 25, 2023 - Pelleted the whole flask for DNA extraction and sequencing
				Red	0	0	0	0	0
				Dead	1	1	2	2	1.5
RADIAL NERVE CORD CELL CULTURE - Lv_2 (Nerve 2)
April 12/24	0	UM+15% FBS	Collagenase	Live cells	231	268	304	212	253.75	5075000	5075000		87.1993	#NUM!	0
			in HBSS	Dead	45	42	24	38	37.25
				Red	0	0	0	0	0
April 15/24	3	UM+15% FBS	Collagenase	Live	67	86	86	84	80.75	1615000	8075000	5075000	89.7222	0.669666	0.669666	Seeded all cells on a T25 flask in 5 ml Urchin media with 15% FBS and 2X Anti-Anti
			in HBSS	Dead	6	9	14	8	9.25
				Red	0	1	0	1	0.5
April 19/24	7	UM+15% FBS	Collagenase	Live	41	53	55	61	52.5	1050000	5250000	8075000	92.1053	-0.620784	0.669666
			in HBSS	Dead	2	5	5	6	4.5
				Red	0	0	1	0	0.25
April 26/24	14	UM+15% FBS	Collagenase	Live	38	53	51	49	47.75	955000	4775000	5250000	91.3876	-0.136737	0.669666
			in HBSS	Dead	6	4	4	4	4.5
				Red	0	0	1	0	0.25
May 3/24	21	UM+15% FBS	Collagenase	Live	31	23	28	26	27	540000	2700000	4775000	93.1034	-0.822064	0.669666
			in HBSS	Dead	2	1	2	3	2
				Red	0	0	0	0	0
May 10/24	28	UM+15% FBS	Collagenase	Live	25	15	28	34	25.5	510000	2550000	2700000	95.3271	-0.0824143	0.669666
			in HBSS	Dead	1	1	2	1	1.25
				Red	0	0	0	0	0
May 17/24	35	UM+15% FBS	Collagenase	Live	45	56	61	63	56.25	1125000	5625000	2550000	94.9367	1.14069	1.81036
			in HBSS	Dead	1	4	3	4	3
				Red	0	0	0	0	0
May 23 - Took a cell pellet of all suspension cells and only re-seeded all attached cells

## Sheet: Coelomoctyes
Table S10 – Growth and viability of L. variegatus adult cell cultures - Coelomocytes
Date	Experiment Day	Media	Dissociation Method	Cell state	Cell Counts (hemocytometer)				Average cell counts	Cells/ml	Total Cells	Number cells seeded	Viability % live cells	Pop doubling	cumulative population doubling
					Ch1	Ch2	Ch3	Ch4
COELOMOCYTES in UM with 5% FBS (Coel 1)
Jan 18/22	0	UM+5% FBS	N/A	Live cells	195	199	184		192.667	3.85333e+06	1.54133e+07		#DIV/0!	#NUM!	0
									#DIV/0!					#DIV/0!
									#DIV/0!
Jan 25/22	7	UM+5% FBS	N/A	Live	21	21	11	26	19.75	395000	1975000	5000000	100	-1.3393	0
				Dead	0	0	0	0	0					-1.3393
				Red	0	0	0	0	0
Feb 1/22	14	UM+5% FBS	N/A	Live	33	40	34	37	36	720000	3600000	1975000	92.3077	0.865642	0.865642
				Dead	3	3	2	4	3					0.865642
				Red	0	0	0	0	0
Feb 8/22	21	UM+5% FBS	N/A	Live	16	16	22	29	20.75	415000	2075000	3600000	87.3684	-0.794424	0.865642
				Dead	3	4	3	2	3					-0.794424
				Red	0	0	0	0	0
Feb 15/22	28	UM+5% FBS	N/A	Live	23	18	24	21	21.5	430000	2150000	2075000	91.4894	0.0511956	0.916837
				Dead	1	3	2	2	2					0.0511956
				Red	0	0	0	0	0
Feb 22/22	35	UM+5% FBS	N/A	Live	10	10	9	13	10.5	210000	1050000	2150000	87.5	-1.03335	0.916837
				Dead	3	1	1	1	1.5					-1.03335
				Red	0	0	0	0	0
Mar 8/22	49	UM+5% FBS	N/A	Live	3	2	3	6	3.5	70000	350000	2150000	100	-2.61739	0.916837
				Dead	0	0	0	0	0					-2.61739
				Red	0	0	0	0	0
COELOMOCYTES in UM with 15% FBS (Coel 2)
Jan 18/22	0	UM+15% FBS	N/A	Live	195	199	184		192.667	3.85333e+06	1.54133e+07		#DIV/0!	#NUM!	0
				Dead					#DIV/0!					#DIV/0!
				Red					#DIV/0!
Jan 25/22	7	UM+15% FBS	N/A	Live	6	6	15	6	8.25	165000	825000	5000000	100	-2.59795	0
				Dead	0	0	0	0	0					-2.59795
				Red	0	0	0	1	0.25
Feb 1/22	14	UM+15% FBS	N/A	Live	41	33	36	28	34.5	690000	3450000	825000	93.8776	2.06293	2.06293
				Dead	2	1	4	2	2.25					2.06293
				Red	0	0	0	0	0
Feb 8/22	21	UM+15% FBS	N/A	Live	15	26	32	26	24.75	495000	2475000	3450000	95.1923	-0.47889	2.06293
				Dead	0	1	4	0	1.25					-0.47889
				Red	0	0	0	0	0
Feb 15/22	28	UM+15% FBS	N/A	Live	19	18	13	22	18	360000	1800000	2475000	88.8889	-0.459165	2.06293
				Dead	2	3	2	2	2.25					-0.459165
				Red	0	0	0	0	0
Feb 22/22	35	UM+15% FBS	N/A	Live	9	6	10	11	9	180000	900000	2475000	81.8182	-1.45858	2.06293
				Dead	3	0	2	3	2					-1.45858
				Red	1	0	0	1	0.5
Mar 8/22	49	UM+15% FBS	N/A	Live	2	3	5	4	3.5	70000	350000	2475000	100	-2.82036	2.06293
				Dead	0	0	0	0	0					-2.82036
				Red	0	1	1	1	0.75
COELOMOCYTES - Lv_1 (Coel 3)
April 12/24	0	UM+15% FBS	N/A	Live cells	163	185	176	174	174.5	1745000	3490000		100	#NUM!	0
		50:50 CF:UM		Dead	0	0	0	0	0
				Red	0	0	0	0	0
April 15/24	3	UM+15% FBS	N/A	Live	40	31	35	41	36.75	735000	3675000	3490000	91.875	0.074474	0.074474
				Dead	2	4	3	4	3.25
				Red	0	0	0	0	0
April 19/24	7	UM+15% FBS	N/A	Live	30	36	21	28	28.75	575000	2875000	3675000	87.7863	-0.353977	0.074474
				Dead	4	3	5	4	4
				Red	0	0	0	0	0
April 26/24	14	UM+15% FBS	N/A	Live	21	31	30	25	26.75	535000	2675000	2875000	86.9919	-0.103963	0.074474
				Dead	5	4	4	3	4
				Red	0	0	0	0	0
May 3/24	21	UM+15% FBS	N/A	Live	10	9	11	13	10.75	215000	1075000	2675000	87.7551	-1.31444	0.074474
				Dead	1	2	2	1	1.5
				Red	0	0	0	0	0
May 10/24	28	UM+15% FBS	N/A	Live	23	16	21	27	21.75	435000	2175000	1075000	88.7755	1.01609	1.09056
				Dead	1	4	2	4	2.75
				Red	0	0	0	0	0
May 17/24	35	UM+15% FBS	N/A	Live	15	18	8	12	13.25	265000	1325000	2175000	88.3333	-0.714608	1.09056
				Dead	1	2	1	3	1.75
				Red	0	0	0	0	0
COELOMOCYTES - Lv_3 (Coel 4)
April 22/24	0	UM+15% FBS	N/A	Live cells	206	222	242	272	235.5	2355000	4710000		100	#NUM!	0
		50:50 CF:UM		Dead	0	0	0	0	0
				Red	0	0	0	0	0
April 25/24	3	UM+15% FBS	N/A	Live	32	40	34	37	35.75	715000	3575000	4710000	95.3333	-0.397553	0
				Dead	3	1	1	2	1.75
				Red	0	0	0	0	0
April 30/24	8	UM+15% FBS	N/A	Live	20	28	27	14	22.25	445000	2225000	3575000	92.7083	-0.683741	0
				Dead	1	3	2	1	1.75
				Red	0	0	0	0	0
May 6/24	14	UM+15% FBS	N/A	Live	13	15	11	8	11.75	235000	1175000	2225000	88.6792	-0.92061	0
				Dead	2	1	1	2	1.5
				Red	0	1	0	0	0.25
May 13/24	21	UM+15% FBS	N/A	Live	4	2	3	3	3	60000	300000	1175000	85.7143	-1.96848	0
				Dead	0	1	1	0	0.5
				Red	0	0	0	0	0
COELOMOCYTES - Lv_4 (Coel 5)
April 22/24	0	UM+15% FBS	N/A	Live cells	165	136	150	138	147.25	1472500	2945000		100	#NUM!	0
		50:50 CF:UM		Dead	0	0	0	0	0
				Red	0	0	0	0	0
April 25/24	3	UM+15% FBS	N/A	Live	40	32	35	36	35.75	715000	3575000	2945000	95.3333	0.279513	0.279513
				Dead	2	1	2	2	1.75
				Red	0	0	0	0	0
April 30/24	8	UM+15% FBS	N/A	Live	38	32	16	28	28.5	570000	2850000	3575000	94.2149	-0.326792	0.279513
				Dead	2	2	1	2	1.75
				Red	0	0	0	0	0
May 6/24	14	UM+15% FBS	N/A	Live	16	8	13	12	12.25	245000	1225000	2850000	89.0909	-1.21747	0.279513
				Dead	1	2	2	1	1.5
				Red	0	0	1	0	0.25
May 13/24	21	UM+15% FBS	N/A	Live	3	2	5	7	4.25	85000	425000	1225000	85	-1.52636	0.279513
				Dead	0	0	2	1	0.75
				Red	0	0	0	0	0

## Sheet: Tube feet
Table S10 – Growth and viability of L. variegatus adult cell cultures - Tube feet-derived cells
Date	Experiment Day	Media	Dissociation method	Cell state	Cell Counts (hemocytometer)				Average cell counts	Cells/ml	# cells seeded	total cells	Viability % live cells	Pop doubling	Cumulative population doubling
					Ch1	Ch2	Ch3	Ch4
TUBE FEET CELL CULTURES
Jan 18/22	0	UM+5% FBS	Collagenase	Live	356	520	416	472	441	8820000		4410000	#DIV/0!	#NUM!	#NUM!
									#DIV/0!					#DIV/0!
									#DIV/0!
Jan 25/22	7	UM+5% FBS	Collagenase	Live	79	60	72	81	73	1460000	3520000	7300000	100	1.05171	1.05171
				Dead	0	0	0	0	0					1.05171
				Red	12	20	13	11	14
Feb 1/22	14	UM+5% FBS	Collagenase	Live	14	11	12	12	12.25	245000	3000000	1225000	79.0323	-1.29143	1.05171
				Dead	3	5	2	3	3.25					-1.29143
				Red	0	0	0	0	0
Feb 1/22	14	UM+15% FBS	Collagenase	Live	9	11	13	11	11	220000	3000000	1100000	80	-1.44662	1.05171
				Dead	3	2	4	2	2.75					-1.44662
				Red	0	0	0	0	0
Feb 8/22	21	UM+5% FBS	Collagenase	Live	3	1	3	0	1.75	35000	1225000	175000	46.6667	-2.80573	1.05171
				Dead	1	1	2	4	2					-2.80573
				Red	0	0	0	0	0
Feb 8/22	21	UM+15% FBS	Collagenase	Live	2	4	4	1	2.75	55000	1100000	275000	64.7059	-1.99884	1.05171
				Dead	2	3	1	0	1.5					-1.99884
				Red	0	0	0	0	0

## Sheet: Spines
Table S10 – Growth and viability of L. variegatus adult cell cultures - Spine-derived cells
Date	Experiment Day	Media	Dissociation method	Cell state	Cell Counts (hemocytometer)				Average cell counts	Cells/ml	# cells seeded	total cells	Viability % live cells	Pop doubling	Cumulative population doubling
					Ch1	Ch2	Ch3	Ch4
SPINE CELL CULTURES
Jan 18/22	0	UM+5% FBS	Collagenase	Live cells	344	428	456	372	400	8000000		8000000	#DIV/0!	#NUM!	0
									#DIV/0!					#DIV/0!
									#DIV/0!
Jan 25/22	7	UM+5% FBS	Collagenase	Live	21	16	11	20	17	340000	5000000	1700000	98.5507	-1.55549	0
				Dead	0	0	0	1	0.25					-1.55549
				Red	0	0	0	1	0.25
Feb 1/22	14	UM+5% FBS	Collagenase	Live	11	12	12	13	12	240000	1700000	1200000	72.7273	-0.502209	0
				Dead	4	4	7	3	4.5					-0.502209
				Red	0	0	0	0	0
Feb 8/22	21	UM+5% FBS	Collagenase	Live	2	1	4	2	2.25	45000	1200000	225000	45	-2.41364	0
				Dead	3	2	3	3	2.75					-2.41364
				Red	0	0	0	0	0

## Sheet: Ovary graphs
Table S10 – Growth and viability of L. variegatus adult cell cultures - Summary of ovary cultures
Day	Ovary 1	Ovary 2	Ovary 3	Ovary 4	Ovary 5	Ovary 6	Ovary 7									Day	Ovary 1	Ovary 2	Ovary 3	Ovary 4	Ovary 5	Ovary 6	Ovary 7
0	0	0	0	0	0	0	0									0	100	100	100	77.5013	96.861	97.1857	97.1857
2	2.12144	2.89749							Cell proliferation over time (days in cultue)							2	97.6457	97.5163							Cell viability over time (days in cultue)
3				0.73												3				87.0423
6			1.0936		1.71782	1.06605	2.60137									6			98.1609		90.1826	86.3395	86.7857
7				0.725112												7				83.5938
9	4.01435	4.62767														9	95.7082	98.0798
13			2.08968		3.00494	3.54789	4.28969									13			98.8532		93.9103	87.5979	89.7912
14				0.803778												14				81.8841
16	5.34986	5.99145														16	94.0994	98.0952
20			3.22652		4.24707	5.71388	6.24585									20			98.6547		94.9833	83.3076	91.0156
21				0.803778												21				88.5417
23	6.98118	7.80802														23	98.4127	98.878
27			5.48574		5.17254	7.75417	8.19581									27			98.2906		90.1186	83.871	88.0455
28				0.803778												28				86.7647
30	8.49547	9.64691														30	98.5632	98.6226
34			6.68144		6.27063	9.58093	9.94968									34			96.831		88.9273	82.3985	81.3253
35				0.803778												35				88.8889
37	9.30236	11.6511														37	95.4545	98.6486
41			6.89337		6.27	9.58	9.95									41			95.8621		88.9273	82.3985	81.3253
44	11.1359	13.7048														44	95.9641	98.8109
48			7.76076		7.74163	10.1806	11.3866									48			96.4758		76.3761	83.4862	76.8322
51	12.9353	15.709														51	95.8716	98.77
55			8.4973		8.72292	11.1557	12.6083									55			96.1538		84.0426	89.0566	80
58	14.8665	17.7061														58	97.0339	99.0087
62			8.72982		9.56373	12.0621	12.9585									62			95.2703		85.6574	87.8906	80.1047
65	16.6932	19.7085														65	95.0893	98.647
69			8.72982		10.0574	12.4218	12.9705									69			93.2692		74.7788	81.9149	84.0278
72	18.0144	20.664														72	98.0392	97.9798
76			9.65294				12.9705									76			97.3545				85.7143
79	19.0494	23.689														79	93.8931	97.0534
83			9.65294				12.9705									83			96.9072				84.8837
86	20.1077	25.5623														86	96.1538	98.2143
90			10.0523													90			95.3846
93	20.6268	26.8739														93	94.5055	94.9045
97			10.0523													97			94.8454
100	21.3342	28.2046														100	96.0784	94.6708
104			10.0523													104			97.8022
105							14.1463									105							87.766
107	21.8193	29.5353														107	95.4545	84.8315
111			10.0523													111			94.0476
112							14.1463									112							79.8995
114	22.3045	30.2791														114	95.4545	87.013
118			10.0523													118			94.9153
119							14.8621									119							92
121	22.3045	31.4322														121	93.75	92.069
125			10.0523													125			94
126							15.7643									126							95.5556
128	22.3045	31.4322														128	92.5926	63.1868	93.578
132			11.1695													132
133							15.9078									133							76
135	22.333	31.6419														135	87.931	78.2353
139			11.1695													139			97.619
140							16.0793									140							68.3706

## Sheet: All Tissues Graphs
Table S10 – Growth and viability of L. variegatus adult cell cultures - Summary of cultures from all tissues
Day	Ovary	Ovary 2	Ovary 3	Ovary 4	Ovary 5	Ovary 6	Ovary 7	Muscle	Muscle 2	Muscle 3	Muscle 4	Nerve	Nerve 2	Coel	Coel 2	Coel 3	Tube feet	Spine				Ovary	Ovary 2	Ovary 3	Ovary 4	Ovary 5	Ovary 6	Ovary 7	Muscle	Muscle 2	Muscle 3	Muscle 4	Nerve	Nerve 2	Coel	Coel 2	Coel 3	Tube feet	Spine
0	0	0	0	0	0	0	0	0	0	0	0	0	0	0	0	0	0	0			0	100	100	100	77.5013	96.861	97.1857	97.1857	100	89.0772	100	100	100	87.1993	100	100	100	100	100
2	2.12144	2.89749						0.254849				0									2	97.6457	97.5163						95.9786				96.0938
3				0.73					0				0.67			0.074474					3				87.0423					90.9091				89.7222			91.875
6			1.0936		1.71782	1.06605	2.60137			0	0										6			98.1609		90.1826	86.3395	86.7857			94.186	94.6903
7				0.725112					1.81657				0.669666	0	0	0.074474	1.05171	0			7				83.5938					93.6877				92.1053	100	100	87.7863	100	98.5507
9	4.01435	4.62767						0.254849				0.150155									9	95.7082	98.0798						96.3746				96.8085
13			2.08968		3.00494	3.54789	4.28969			1.45372	0.667536										13			98.8532		93.9103	87.5979	89.7912			95.6897	95.5056
14				0.803778					1.81657				0.669666	0.865642	2.06293	0.074474	1.05171	0			14				81.8841					93.6759				91.3876	92.3077	93.8776	86.9919	80	72.7273
16	5.34986	5.99145						0.254849				0.176324									16	94.0994	98.0952						93.7824				96.5278
20			3.22652		4.24707	5.71388	6.24585			1.45372	0.667536										20			98.6547		94.9833	83.3076	91.0156			92.4528	92.7273
21				0.803778					1.81657				0.669666	0.865642	2.06293	0.074474	1.05171	0			21				88.5417					90.7692				93.1034	87.3684	95.1923	87.7551	64.7059	45
23	6.98118	7.80802						0.391548				0.271647									23	98.4127	98.878						94.7619				94.586
27			5.48574		5.17254	7.75417	8.19581			1.45372	0.667536										27			98.2906		90.1186	83.871	88.0455			91.1565	91.8367
28				0.803778					1.81657				0.669666	0.916837	2.06293	1.09056					28				86.7647					88.7324				95.3271	91.4894	88.8889	88.7755
30	8.49547	9.64691						0.391548				0.271647									30	98.5632	98.6226						92.5373				95.7627
34			6.68144		6.27063	9.58093	9.94968			1.45372	0.667536										34			96.831		88.9273	82.3985	81.3253			86.5854	87.5
35				0.803778					1.81657				1.81036	0.916837	2.06293	1.09056					35				88.8889					92.8571				94.9367	87.5	81.8182	88.3333
37	9.30236	11.6511						0.952726				0.405586									37	95.4545	98.6486						93.8462				93.2331
41			6.89337		6.27	9.58	9.95														41			95.8621		88.9273	82.3985	81.3253
44	11.1359	13.7048						0.952726				0.405586									44	95.9641	98.8109						95.0355				95.8763
48			7.76076		7.74163	10.1806	11.3866														48			96.4758		76.3761	83.4862	76.8322
49														0.916837	2.06293						49														100	100
51	12.9353	15.709										0.405586									51	95.8716	98.77						95.7317				95.1807
55			8.4973		8.72292	11.1557	12.6083	1.18112													55			96.1538		84.0426	89.0566	80
58	14.8665	17.7061						1.18112				0.843019									58	97.0339	99.0087						96.13				95.5357
62			8.72982		9.56373	12.0621	12.9585														62			95.2703		85.6574	87.8906	80.1047
65	16.6932	19.7085						1.18112				1.26118									65	95.0893	98.647						94.8052				94.0789
69			8.72982		10.0574	12.4218	12.9705														69			93.2692		74.7788	81.9149	84.0278
72	18.0144	20.664						1.18112				1.26118									72	98.0392	97.9798						91.3043				92.3077
76			9.65294				12.9705														76			97.3545				85.7143
79	19.0494	23.689						1.31229				1.26118									79	93.8931	97.0534						93.2432				90.7692
83			9.65294				12.9705														83			96.9072				84.8837
86	20.1077	25.5623																			86	96.1538	98.2143
90			10.0523																		90			95.3846
93	20.6268	26.8739																			93	94.5055	94.9045
97			10.0523																		97			94.8454
100	21.3342	28.2046																			100	96.0784	94.6708
104			10.0523																		104			97.8022
105							14.1463														105							87.766
107	21.8193	29.5353																			107	95.4545	84.8315
111			10.0523																		111			94.0476
112							14.1463														112							79.8995
114	22.3045	30.2791																			114	95.4545	87.013
118			10.0523																		118			94.9153
119							14.8621														119							92
121	22.3045	31.4322																			121	93.75	92.069
125			10.0523																		125			94
126							15.7643														126							95.5556
128	22.3045	31.4322																			128	92.5926	63.1868	93.578
132			11.1695																		132
133							15.9078														133							76
135	22.333	31.6419																			135	87.931	78.2353
139			11.1695																		139			97.619
140							16.0793														140							68.3706
