# Supplementary material for: Genetically tractable embryonic cell lines from sea urchins
Source: Research Square preprint supplement (doi:10.21203/rs.3.rs-5665288/v1), 2025-01-15
Supplement: Supplementary file 8 [file ad73e9c688e1d775f0c82769.xlsx]

## Sheet: Marker Gene Expression
Table S2 – Single-cell RNA sequencing of L. variegatus embryonic cell culture spheroids - Marker gene expression (average expression of each gene in each cluster)
Gene ID	Cluster 0	Cluster 1	Cluster 2	Cluster 3	Cluster 4	Cluster 5	Cluster 6	Cluster 7	Gene Description
Primary Mesenchyme - Skeletogenic Cell Markers (mesoderm)
LOC121427215	0.0021539	0.0123468	0.00350528	0	0.00214862	0	0.0364394	0	mesenchyme-specific_cell_surface_glycoprotein-like
LOC121428121	0.00948163	0	0.00170708	0	0.00440807	0	0	0.339147	mesenchyme-specific_cell_surface_glycoprotein-like
LOC121428213	0.0478388	0.129343	0.0341699	0.0281119	0.0264568	0.0575056	0.0504004	0.115402	mesenchyme-specific_cell_surface_glycoprotein-like
LOC121427682	0.0259215	0.0164678	0.0108042	0.011948	0.0129358	0.0199551	0	0	mesenchyme-specific_cell_surface_glycoprotein-like
LOC121427215	0.0021539	0.0123468	0.00350528	0	0.00214862	0	0.0364394	0	mesenchyme-specific_cell_surface_glycoprotein-like
LOC121427374	0.00393946	0.0223615	0.00402077	0.0178632	0.0108056	0.00420405	0.0101438	0	mesenchyme-specific_cell_surface_glycoprotein-like
Total Expression	0.0914892	0.192866	0.0577125	0.0579231	0.0589036	0.0816647	0.133423	0.454548
Pigment Cell Markers (mesoderm)
LOC121428528	0.0635422	0.145816	0.0348362	0.0771798	0.059672	0.0189425	0.171497	0.0565171	probable_polyketide_synthase_1
LOC121418887	0.00257041	0.00342478	0.0082739	0	0.00108085	0	0	0	homeobox_protein_six1-like
Total Expression	0.0661126	0.149241	0.0431101	0.0771798	0.0607528	0.0189425	0.171497	0.0565171
Immune Cell Markers (mesoderm)
LOC121424758	0.118708	0.26749	0.172319	0.083324	0.11201	0.102741	1.24193	0.284836	antiviral_innate_immune_response_receptor_RIG-I-like
LOC121429221	0.0124952	0.0221461	0.00475276	0.0123124	0.0141493	0.0040487	0.039439	0.0793232	antiviral_innate_immune_response_receptor_RIG-I-like
LOC121429836	0.128033	0.268058	0.700851	0.0757877	0.227253	0.0518296	0.383822	0.357263	B-cell_CLL/lymphoma_6_member_B_protein-like
LOC121408239	0.130074	0.161203	0.155782	0.146696	0.215903	0.116425	0.141446	0.0664448	B-cell_CLL/lymphoma_7_protein_family_member_B-A-like
LOC121410653	0.0818219	0.14045	0.0789028	0.122306	0.117786	0.150615	0.134784	0.16618	myeloid_differentiation_primary_response_protein_MyD88-like
LOC121427405	0.656285	0.675137	0.55107	0.715302	0.769868	0.588616	0.758101	0.625251	myeloid_leukemia_factor_2-like
LOC121415046	1.11916	0.917509	1.21371	1.11681	1.2077	1.08789	0.93194	2.30818	myeloid-derived_growth_factor-like
LOC121407539	0.166486	0.204447	0.11214	0.103982	0.188331	0.17425	0.0837551	0.16577	scavenger_receptor_cysteine-rich_domain_superfamily_protein-like
LOC121418958	0	0.00239877	0.00338131	0	0	0	0.0289759	0	scavenger_receptor_cysteine-rich_domain_superfamily_protein-like
LOC121430492	0.0572844	0.116585	0.0627639	0.0657169	0.0642903	0.0775524	0.207265	0.073124	scavenger_receptor_cysteine-rich_domain_superfamily_protein-like
LOC121409183	0.00271035	0.00322343	0.0038196	0.00108833	0.00133816	0.00251442	0	0.00870322	scavenger_receptor_cysteine-rich_domain_superfamily_protein-like
LOC121415045	0.00644664	0.00787755	0.00328747	0	0.00456292	0.00434643	0.0953738	0.341528	scavenger_receptor_cysteine-rich_domain_superfamily_protein-like
LOC121417344	0.00781889	0.0121153	0.034193	0.01857	0.0262409	0.00774235	0.0278728	0	scavenger_receptor_cysteine-rich_domain_superfamily_protein-like
LOC121406251	0.0315531	0.071105	0.0182708	0.0171018	0.0236273	0.0203564	0.0878321	0.01574	scavenger_receptor_cysteine-rich_domain_superfamily_protein-like
LOC121406076	0.0120468	0.0285667	0.00590757	0.00137866	0.000887895	0	0	0	scavenger_receptor_cysteine-rich_domain_superfamily_protein-like
LOC121405657	0	0.00508125	0.000931258	0	0	0	0	0	scavenger_receptor_cysteine-rich_domain_superfamily_protein-like
LOC121423765	0.165445	0.252188	0.153399	0.122358	0.189672	0.176022	0.162409	0.162425	scavenger_receptor_cysteine-rich_domain-containing_group_B_protein-like
LOC121407742	0.00312251	0.0235956	0.0110007	0.00543715	0	0.00244739	0	0	scavenger_receptor_cysteine-rich_type_1_protein_M130-like
LOC121415100	0.00205573	0.0150231	0.00285183	0.00641659	0.00365531	0.00252835	0	0	scavenger_receptor_cysteine-rich_type_1_protein_M130-like
LOC121405934	1.30798	1.16671	1.54105	1.12006	1.24681	1.18394	1.97505	1.99948	toll-interacting_protein-like
LOC121429315	0	0	0	0	0	0	0.0837324	0	toll-like_receptor_3
LOC121411011	0	0.0139174	0.00555951	0.00176214	0.00416563	0	0.0397521	0	toll-like_receptor_3
LOC121415541	0	0	0	0	0	0	0	0.0317687	toll-like_receptor_3
LOC121428517	0	0.00128248	0.00271883	0	0.00206102	0	0	0	toll-like_receptor_13
LOC121425568	0	0	0	0	0.00327251	0	0	0	toll-like_receptor_3
LOC121425991	0	0.0074712	0.00252209	0	0.00184618	0	0	0	toll-like_receptor_4
LOC121427498	0	0	0.000890764	0	0	0	0	0	toll-like_receptor_4
LOC121417346	0	0.00422071	0.00118354	0.00472286	0.00396975	0	0	0	toll-like_receptor_6
LOC121415002	0	0	0	0	0	0	0.0330481	0	toll-like_receptor_6
LOC121425855	0	0.00956494	0.001743	0	0.00185075	0.00213903	0	0	toll-like_receptor_6
LOC121427692	0.002121	0.0033297	0.00230618	0	0.00213602	0.00316565	0	0	toll-like_receptor_Tollo
LOC121417165	0.0226344	0.0319798	0.0181061	0.0352125	0.0209633	0.0376681	0.05211	0.00626419	complement_C3-like
LOC121428641	0.0400391	0.186128	0.0916594	0.0498363	0.0638388	0.0587267	0	0.0983728	complement_C3-like
LOC121413965	0.00430077	0.02138	0.00295646	0	0.00417669	0.00105779	0.0062174	0	echinoidin-like
LOC121429941	0.00247632	0	0	0	0	0	0	0.0932401	echinoidin-like
LOC121407054	0	0.0117175	0.00234663	0	0	0.00952876	0	0	erythroid_differentiation-related_factor_1-like
LOC121407251	0.014497	0.022738	0.00356226	0	0.00739428	0.00211625	0	0.0701385	erythroid_differentiation-related_factor_1-like
Total Expression	4.0956	4.67463	4.96594	3.82618	4.52977	3.86827	6.51486	6.95404
Muscle Cell Markers (mesoderm)
LOC121423582	0.20196	0.511002	0.389121	0.19494	0.268244	0.16697	0.345262	0.193345	muscle,_skeletal_receptor_tyrosine-protein_kinase-like
LOC121423883	0.406102	0.418757	0.378871	0.355862	0.426105	0.485777	0.246068	0.452257	muscle-specific_protein_20-like
LOC121423749	0.851688	0.672112	0.834746	0.571007	0.826665	0.983831	0.631068	1.15563	muscle-specific_protein_20-like
LOC121423027	0.166239	0.136746	0.159769	0.0926628	0.206411	0.156605	0.354947	0.169353	myocardin-related_transcription_factor_A-like
LOC121408547	0.0463069	0.156195	0.0633486	0.0595522	0.0985467	0.0887417	0.169832	0.0719663	myosin_heavy_chain,_striated_muscle-like
LOC121411529	0.0121554	0.0173582	0.00132938	0	0.0371812	0.00802465	0.0364144	0	myosin_light_chain_3,_skeletal_muscle_isoform-like
LOC121424934	0	0.00269021	0.00298168	0	0.00375484	0.00326161	0	0	myosin_light_chain_kinase,_smooth_muscle-like
LOC121423932	0.0234091	0.03259	0.0172261	0.0130532	0.0297571	0.0285909	0.0350914	0.0174434	dystrophin,_isoforms_A/C/F/G/H-like
LOC121413102	0.00589139	0.074777	0.0213284	0.0211961	0.029734	0.0146156	0.0653016	0.0846202	dystrophin-like
LOC121413111	0.0148104	0.0583689	0.0398646	0.0269895	0.0272926	0.00544197	0	0.014068	dystrophin-like
LOC121414391	0.0380463	0.0487203	0.0621672	0.0379833	0.0691908	0.064401	0.00995111	0.110789	dystrophin-like
LOC121414482	0.0166236	0.0215823	0.0142057	0.033871	0.0112845	0.0217625	0	0.0492914	dystrophin-like
LOC121421806	0.00752735	0.00147693	0.0163666	0.00902164	0.0184484	0.00579748	0	0	troponin_T,_skeletal_muscle-like
LOC121420945	0.137693	0.119493	0.126764	0.106868	0.0795985	0.0699974	0.0451215	0.0836075	troponin_T,_skeletal_muscle-like
Total Expression	1.92845	2.27187	2.12809	1.52301	2.13221	2.10382	1.93906	2.40237
Neuronal Cell Markers (Ectoderm)
LOC121430133	0.021054	0.0553691	0.0315241	0.0410671	0.0595349	0.0469019	0.0885886	0.0149318	transcription_factor_Sox-2-like
LOC121420114	0.355376	0.479528	0.452451	0.53977	0.412456	0.291207	0.555224	0.151465	amyloid-like_protein_1
LOC121419935	0.091685	0.108746	0.0290306	0.0692042	0.065698	0.0992549	0.0588513	0.0480826	neural_cell_adhesion_molecule_1-like
LOC121420039	0.133163	0.143817	0.0783068	0.178272	0.123057	0.17355	0.211463	0.124179	neural_cell_adhesion_molecule_1-like
LOC121420426	0.016751	0.0514585	0.013433	0.0191434	0.00720304	0.0200477	0.0300455	0	neural_cell_adhesion_molecule_L1-like
LOC121429231	0.226608	0.194597	0.0888769	0.0864914	0.14369	0.390751	0.268877	0.0348747	neural_proliferation_differentiation_and_control_protein_1-like
LOC121410776	0.452482	0.501532	0.492396	0.518752	0.44769	0.418874	0.514677	0.253314	neural_Wiskott-Aldrich_syndrome_protein-like
LOC121418785	0.040229	0.0861044	0.0369107	0.0488145	0.041989	0.0804639	0.0423619	0	neurexin-3a-like
LOC121410654	0.0257952	0.127868	0.06295	0.0528609	0.0734811	0.0700964	0.241983	0.0429145	neurexin-4-like
LOC121431448	0.00306093	0.0114907	0.0021066	0	0.00833341	0	0	0	neurexin-4-like
LOC121412155	0.04182	0.25123	0.131408	0.148707	0.0932009	0.0943606	0.22572	0.126099	neurobeachin-like
LOC121412231	0.0502287	0.357104	0.138226	0.173386	0.118057	0.0867858	0.268274	0.343766	neurobeachin-like
LOC121425792	0.0867145	0.150335	0.0780853	0.0412954	0.10459	0.0572884	0.207901	0.0803996	neurobeachin-like_protein_1
LOC121418701	0.615538	0.776534	0.852173	0.783407	0.848401	0.318281	1.45845	1.32299	neuroblast_differentiation-associated_protein_AHNAK-like
LOC121415410	0.22371	0.321735	0.185262	0.202842	0.226835	0.146863	0.178369	0.416093	neuroblastoma-amplified_sequence-like
LOC121408274	0.0425785	0.020184	0.0127949	0.0128759	0.0193649	0.0339966	0.0427796	0	neurocalcin_homolog
LOC121430553	1.15421	1.15142	1.35651	1.18458	1.26847	1.0989	1.39078	1.89652	neurocalcin_homolog
LOC121409194	0.00650257	0.00825969	0.0136497	0.00643837	0.00311571	0	0.0516771	0	cyclic_nucleotide-gated_channel_cone_photoreceptor_subunit_alpha-like
LOC121415184	0	0.0147407	0.00696944	0.0113504	0.0114165	0.00605013	0.005471	0	neurochondrin-like
LOC121415206	0	0.030462	0.0193912	0.000811314	0.0135254	0.00968017	0	0.00430288	neurochondrin-like
LOC121408157	0.164299	0.270112	0.21731	0.196172	0.248449	0.205577	0.204162	0.354423	neurofibromin-like
LOC121424392	0.0911479	0.223048	0.0912265	0.177956	0.132187	0.0878665	0.0882411	0.393038	neurofilament_heavy_polypeptide-like
LOC121432068	0.0259945	0.0437458	0.0326432	0.0254735	0.026546	0.0108249	0.0655296	0.0697041	neurofilament_heavy_polypeptide-like
LOC121425197	0.0160341	0.0358658	0.0450867	0.0306957	0.0175454	0.0279479	0.0121772	0	neurofilament_medium_polypeptide-like
LOC121406041	0.273602	0.490918	0.531262	0.351691	0.472772	0.251538	0.94398	0.673588	neuron_navigator_2-like
LOC121405822	0.0683634	0.512813	0.111693	0.0481388	0.0829987	0.164641	0.566241	0.0385436	neuron_navigator_2-like
LOC121406089	0.00820937	0.0390816	0.0135414	0.00859468	0.0162395	0.00839351	0.0295257	0.0569071	neuron_navigator_3-like
LOC121428446	0.0492374	0.0616303	0.0628844	0.0459989	0.0691522	0.072494	0.148702	0.0127531	neuronal_calcium_sensor_1-like
LOC121429319	0.0311003	0.0440165	0.0307187	0.0270361	0.033763	0.0502619	0.0386527	0.112713	neuronal_calcium_sensor_1-like
LOC121410924	0.569608	0.710157	0.380036	0.53169	0.648218	0.750113	1.04428	1.13837	neuronal_cell_adhesion_molecule-like
LOC121422572	0.0881615	0.154305	0.0773822	0.0692638	0.123531	0.103728	0.144568	0.129229	neuronal-specific_septin-3-like
LOC121408332	0	0	0	0	0	0	0	0.064288	neuropeptide_Y_receptor_type_1-like
LOC121414889	0.00449058	0.00995456	0.00374944	0.00193385	0.00744445	0.0167335	0	0.0306584	neurotrypsin-like
LOC121415934	0.00472668	0.00911027	0.000821961	0	0.001453	0	0	0	neurotrypsin-like
LOC121430086	0.386805	0.584636	0.232223	0.42937	0.342176	0.466367	0.710257	0.949608	semaphorin-1A-like
LOC121415379	0.233935	0.446909	0.294193	0.351598	0.288169	0.224127	0.613832	0.846492	semaphorin-1A-like
LOC121416262	0.0212095	0.0755494	0.0265716	0.0325554	0.0231912	0.0212332	0.020749	0.0220042	semaphorin-1A-like
LOC121415483	0.00379098	0.0136433	0.00277708	0	0.00732798	0.00271486	0.00313783	0.112423	semaphorin-1A-like
LOC121415590	0.211108	0.535682	0.185535	0.270102	0.205658	0.271656	0.448673	0.518525	semaphorin-2A-like
LOC121411356	0.0598655	0.125601	0.051096	0.0712336	0.0620653	0.0255479	0.106491	0.0412245	semaphorin-5A-like
LOC121416267	0.0397444	0.0980355	0.032449	0.0627464	0.0480659	0.083409	0	0.00862441	semaphorin-6D-like
LOC121416298	0.0476472	0.0887991	0.0234062	0.0399957	0.0678622	0.0765488	0.0446777	0.079602	semaphorin-6D-like
LOC121414415	0.0267232	0.0469472	0.0263396	0.03095	0.023218	0.0473991	0.104336	0.150122	synapse-associated_protein_1-like
LOC121414452	0.039299	0.0417347	0.0367499	0.0163981	0.03359	0.0238652	0	0.0859454	synapse-associated_protein_1-like
LOC121408610	0.0251526	0.0765187	0.0302905	0.0360987	0.0228674	0.022033	0.0775119	0.0393382	synaptic_vesicle_2-related_protein-like
LOC121408904	0.00709905	0.018238	0.00938815	0.0136926	0.00603983	0.00518087	0	0	synaptic_vesicle_2-related_protein-like
LOC121430007	0.0137078	0.047275	0.0156523	0.0295679	0.0118783	0.0435925	0	0.0541617	synaptic_vesicle_2-related_protein-like
LOC121411790	0.0764548	0.0939315	0.0526827	0.0412923	0.0475285	0.0512009	0.0464979	0.169812	synaptic_vesicle_glycoprotein_2B-like
LOC121422033	0.0162957	0.025719	0.0184417	0.00480538	0.0175993	0.0116019	0.0447831	0.0637653	synaptic_vesicle_glycoprotein_2B-like
LOC121420942	0.00871813	0.0269543	0.0201896	0.0221229	0.0155656	0.00288012	0	0	synaptic_vesicle_glycoprotein_2B-like
LOC121418685	0.300447	0.318649	0.465061	0.33793	0.30858	0.370128	0.440443	0.29742	synaptosomal-associated_protein_25-like
LOC121409236	0.197606	0.232878	0.344099	0.156057	0.265367	0.159257	0.491829	0.186715	synaptosomal-associated_protein_29-like
LOC121426324	0.0715708	0.109704	0.0396087	0.0439962	0.0526042	0.0566939	0.124322	0.0645134	synaptosomal-associated_protein_47-like
LOC121411791	0.0283426	0.105801	0.0424409	0.0333904	0.038818	0.0407912	0.0650394	0.187245	extended_synaptotagmin-2-like
LOC121414850	0	0	0.00318651	0.00266085	0.00479721	0.00565135	0.00510961	0.0802729	synaptotagmin-11-like
LOC121432000	0.0032655	0.00292682	0.00381503	0	0.00380717	0.0102695	0	0	synaptotagmin-15-like
LOC121410540	0.0391813	0.102228	0.0747156	0.0759674	0.0825256	0.0450878	0.0873969	0.0933925	synaptotagmin-1-like
LOC121405894	0.324339	0.526721	0.384143	0.400862	0.326451	0.259859	0.498993	0.426534	synaptotagmin-1-like
LOC121405753	0.0267941	0.0156703	0.0300712	0.011838	0.050082	0.0435393	0.0396695	0.0452899	synaptotagmin-7-like
LOC121413911	0.0987354	0.329785	0.142548	0.177534	0.118532	0.0810578	0.20487	0.128477	synaptotagmin-like_protein_4
LOC121423051	0.0601071	0.0705811	0.0164975	0.0438432	0.046797	0.0647821	0.114503	0.163338	40-kDa_huntingtin-associated_protein-like
LOC121431011	0.017458	0.0141007	0.0189208	0.0109906	0.0164314	0.0238636	0.0512085	0	5-hydroxytryptamine_receptor_1D-like
LOC121431454	0.0144921	0.0188297	0.0254193	0.0207423	0.0245228	0.00509692	0.0761773	0.0360716	5-hydroxytryptamine_receptor_1E-like
LOC121409037	0.00350169	0.0345448	0.00673762	0.01237	0.00183025	0.00340288	0	0	5-hydroxytryptamine_receptor_1F-like
LOC121409038	0.0177623	0.0425637	0.0149462	0.00504134	0.0126356	0.028887	0.0121772	0.063674	5-hydroxytryptamine_receptor_1F-like
LOC121425037	0.00669953	0.0217136	0.0111344	0.00365396	0.00987647	0	0.0456515	0.0185443	5-hydroxytryptamine_receptor_1F-like
LOC121429508	0.00617959	0.0780276	0.00937183	0.0165427	0.00651869	0.00184631	0.0461291	0.00626419	5-hydroxytryptamine_receptor_2A-like
LOC121410385	0.218205	0.204353	0.280683	0.281217	0.226471	0.275166	0.304184	0.371234	5-hydroxytryptamine_receptor_2B-like
LOC121409273	0.00714959	0.0300567	0.0136959	0.00921421	0.00248497	0.0131033	0.0421837	0	5-hydroxytryptamine_receptor_4-like
LOC121420478	0.0391895	0.0685738	0.0351802	0.01482	0.0330169	0.0294854	0.0204485	0.00767828	5-hydroxytryptamine_receptor_6-like
LOC121413770	0.00433968	0	0.00134153	0	0	0	0.0287087	0	neuronal_acetylcholine_receptor_subunit_alpha-10-like
LOC121413950	0	0	0.000644523	0	0.00153579	0	0.0489002	0	neuronal_acetylcholine_receptor_subunit_alpha-10-like
LOC121429806	0.170247	0.058367	0.0695178	0.0915105	0.0904026	0.0797337	0.114673	0.153568	neuronal_acetylcholine_receptor_subunit_alpha-3-like
LOC121419309	0.00969453	0	0.00726199	0.00164907	0.0110106	0.0022329	0	0	neuronal_acetylcholine_receptor_subunit_alpha-7-like
LOC121415499	0.295105	0.403859	0.232503	0.109918	0.344517	0.32342	0.515856	0.112596	neuronal_acetylcholine_receptor_subunit_beta-4-like
LOC121425933	0.0690149	0.0986186	0.119803	0.082835	0.0628701	0.0727998	0.029068	0.051321	muscarinic_acetylcholine_receptor_M2-like
LOC121411249	0.114977	0.0858042	0.0444914	0.0428462	0.0881713	0.173506	0.0375787	0.0172846	acetylcholinesterase-like
LOC121411251	0.121011	0.338548	0.103827	0.148982	0.117509	0.349692	0.351305	0.219198	acetylcholinesterase-like
LOC121411255	0.0195391	0.0380198	0.0241053	0.0127695	0.0246713	0.0401319	0.0391399	0.0637247	acetylcholinesterase-like
LOC121423306	0.119253	0.118936	0.100418	0.120753	0.0760437	0.113803	0.164347	0.123271	acetylcholinesterase-like
LOC121423057	0.00285709	0.00890836	0.00124941	0.00835103	0.00442043	0	0	0.00626419	acetylcholinesterase-like
LOC121423202	0	0.00407147	0.00361411	0	0	0.00187396	0	0	acetylcholinesterase-like
LOC121425084	0.0265126	0.0502818	0.0140154	0.00990528	0.0245126	0.0134779	0	0	D(1)_dopamine_receptor-like
LOC121425021	0.00489538	0	0	0	0	0	0.0344916	0	D(1)_dopamine_receptor-like
LOC121426245	0.0374205	0.338795	0.0929173	0.0837888	0.060406	0.0472104	0.319441	0.103819	D(2)_dopamine_receptor_B-like
LOC121419135	0.0027542	0.0153955	0.000924603	0	0	0	0.0360423	0	D(2)_dopamine_receptor-like
LOC121414817	0	0	0.00063405	0	0	0.00262541	0	0	dopamine_D2-like_receptor
LOC121425235	0.00719141	0.00839773	0.00093658	0.00126421	0.0095704	0	0	0	dopamine_receptor_1-like
LOC121424975	0.0217787	0.0658877	0.0332128	0.0243045	0.0621084	0.0169897	0.0331933	0	dopamine_receptor_2-like
LOC121408331	0.933777	1.01642	1.03869	0.82701	0.800635	0.857496	1.7212	1.72167	gamma-aminobutyric_acid_receptor-associated_protein-like_2
LOC121428858	0.00564706	0.0168103	0.00744872	0.00437099	0.00108242	0.0104014	0.0387619	0.0964785	gamma-aminobutyric_acid_type_B_receptor_subunit_1-like
LOC121416730	0.0417654	0.0539285	0.0146931	0.0119408	0.0232777	0.02205	0.0387619	0	gamma-aminobutyric_acid_type_B_receptor_subunit_2-like
LOC121415635	0.0934276	0.128162	0.123826	0.149891	0.0608842	0.0857972	0.280562	0.0841699	glutamate_receptor_1-like
LOC121415638	0.00253339	0	0.00140111	0	0	0	0.0101438	0	glutamate_receptor_1-like
LOC121415639	0.523506	1.26778	1.98128	0.818544	1.19181	0.305603	0.868429	0.541385	glutamate_receptor_1-like
LOC121415634	0.894872	1.36593	2.46443	1.05375	1.16593	0.396441	1.42208	0.879798	glutamate_receptor_3-like
LOC121413962	0.0819999	0.117606	0.101574	0.0618336	0.0903307	0.0854659	0.157129	0.118429	metabotropic_glutamate_receptor_2-like
LOC121414315	0.0150785	0.0688866	0.0387951	0.0544962	0.047669	0.031444	0.030131	0.0978104	metabotropic_glutamate_receptor_3-like
LOC121429617	0.0463529	0.105334	0.0289242	0.0877625	0.0683859	0.0550022	0.144775	0.0480229	metabotropic_glutamate_receptor_3-like
LOC121410982	0.00555747	0.00302525	0.0103431	0.00362368	0.0165449	0.00989927	0.0454904	0	metabotropic_glutamate_receptor_7-like
LOC121427297	0	0.0139789	0.0006648	0.00324566	0.00866131	0	0	0	metabotropic_glutamate_receptor_8-like
LOC121427704	0.00595574	0.00686167	0.0107862	0	0.00476576	0.00720819	0.0243713	0.029623	metabotropic_glutamate_receptor_8-like
Total Expression	11.3581	17.9198	15.3753	12.5613	13.2831	11.1951	20.5534	17.7209
Endodermal Markers
LOC121406173	13.7728	14.1488	8.60921	5.94533	9.53363	22.455	10.6045	6.467	Endo 16
LOC121428657	0.00264116	0.0183874	0.0130907	0.00730994	0.00220071	0.0185293	0.0708301	0	hepatocyte_nuclear_factor_4-alpha-like (FOXA1)
LOC121419318	1.17144	1.04616	0.58723	1.29828	1.14332	1.43268	0.944024	1.12844	hepatocyte_nuclear_factor_3-beta-like (FOXA2)
Total Expression	14.9468	15.2133	9.20953	7.25092	10.6792	23.9062	11.6193	7.59544
Stem Cell Markers
LOC121408828	0	0	0	0.00227645	0	0	0.0348322	0	protein_nanos-like
LOC121408762	0.354133	0.354427	0.404816	0.367956	0.518835	0.360695	0.646359	0.306938	piwi-like_protein_1
LOC121431753	0.0481518	0.0878715	0.0421749	0.0464552	0.0581715	0.0110755	0.246868	0.0951938	piwi-like_protein_1
LOC121424246	0.0460162	0.0706934	0.0606858	0.0612048	0.0645775	0.0334593	0.0488306	0.110798	Vasa (probable_ATP-dependent_RNA_helicase_DDX4)
Total Expression	0.448301	0.512991	0.507677	0.477893	0.641584	0.40523	0.97689	0.51293
Cell Cycle and Cell Proliferation
LOC447797	0.043528	0.0224979	0.0128246	0.0466862	0.106908	0.0230819	0.0108489	0.096172	cyclin_B
LOC121429842	0.0526267	0.0381359	0.0315609	0.0561949	0.0305894	0.0481413	0.101427	0.01574	cyclin-C-like
LOC121407077	0.0660426	0.0653233	0.0714232	0.0639811	0.0497772	0.0584204	0.053627	0.0312809	cyclin-D1-binding_protein_1_homolog
LOC121407841	0.0257797	0.0171936	0.0126811	0.0133617	0.00948553	0.0173003	0	0.023084	cyclin-dependent_kinase_10-like
LOC121427260	0.79716	0.770183	0.916953	0.737586	0.94562	0.748064	0.734409	1.03658	cyclin-dependent_kinase_11B-like
LOC121426721	0.0386825	0.129153	0.0580954	0.0522276	0.0798982	0.0245773	0.0159453	0.0724094	cyclin-dependent_kinase_12-like
LOC121426631	0.0650904	0.118429	0.112659	0.0709495	0.12527	0.057932	0.0808254	0.0814659	cyclin-dependent_kinase_12-like
LOC121423334	0.187686	0.318455	0.152996	0.145083	0.115689	0.107962	1.08651	0.243964	cyclin-dependent_kinase_14-like
LOC121410011	0.174867	0.297915	0.150275	0.181894	0.150962	0.1572	0.176686	0.254475	cyclin-dependent_kinase_17-like
LOC121431660	0.203845	0.253848	0.0633166	0.0871755	0.644327	0.071972	0.0727012	0.249546	cyclin-dependent_kinase_1-like
LOC121411322	0.0111699	0.0449766	0.00866301	0.0576045	0.0167659	0.00728191	0	0.0361191	cyclin-dependent_kinase_20-like
LOC121417954	0.0666325	0.114365	0.0495405	0.066182	0.0518892	0.0461119	0.0481	0	cyclin-dependent_kinase_2-interacting_protein-like
LOC121410761	0.0277768	0.0171974	0.00647955	0.0251187	0.0622372	0.00620079	0	0	cyclin-dependent_kinase_2-like
LOC447791	0.0113544	0.0173959	0.00799668	0.0155966	0.0332802	0.0148124	0.0397032	0	cyclin-dependent_kinase_4
LOC121423575	0.14853	0.288106	0.326705	0.0434809	0.0647827	0.0879461	0.749078	0.231477	cyclin-dependent_kinase_4_inhibitor_C-like
LOC121426230	0	0.00811771	0	0.0208966	0.00902115	0	0	0.0994253	cyclin-dependent_kinase_5_activator_1-like
LOC121415104	0.0635808	0.0914972	0.0664364	0.0896132	0.107362	0.0622673	0.1697	0.0225184	cyclin-dependent_kinase_7-like
LOC121414188	0.0226301	0.0103535	0.0232321	0.0270843	0.0138851	0.0145472	0.0425474	0.00937251	cyclin-dependent_kinase_8-like
LOC121414213	0	0.00435688	0.00645465	0.0193097	0.0105436	0.00850954	0	0.00767828	cyclin-dependent_kinase_8-like
LOC121428575	0.0889796	0.106065	0.0683886	0.11129	0.0843292	0.0546406	0.171905	0.215804	cyclin-dependent_kinase_9-like
LOC121419122	0.163005	0.30471	0.299518	0.26085	0.200419	0.236383	0.134023	0.217546	cyclin-dependent_kinase-like_1
LOC121431955	0.155204	0.540515	0.326311	0.325971	0.273601	0.168313	0.695643	0.327769	cyclin-dependent_kinase-like_4
LOC121411466	0.0372998	0.0905081	0.0388559	0.0368148	0.0667718	0.0905506	0.0274572	0.0306584	cyclin-dependent_kinase-like_5
LOC121420139	0.0177478	0.0197499	0.0139599	0.00904511	0.0312351	0.00737915	0	0.0229095	cyclin-dependent_kinases_regulatory_subunit-like
LOC121426126	0.285182	0.301482	0.206731	0.257705	0.389669	0.335247	0.316075	0.140072	cyclin-dependent-like_kinase_5
LOC121422417	0.0179182	0.029635	0.0177592	0.0341582	0.0922358	0.0146577	0	0.0877388	cyclin-F-like
LOC121412378	0.0156906	0.0430302	0.00916284	0.0361519	0.0310984	0.0187816	0.0164113	0.00746589	cyclin-G2-like
LOC121423665	0.0884037	0.134715	0.0786388	0.0654979	0.0960801	0.0735929	0.0980255	0.189027	cyclin-G-associated_kinase-like
LOC121411123	0.105154	0.103307	0.110107	0.0944758	0.0884296	0.0830078	0.117609	0.0822214	cyclin-H-like
LOC121411174	0.0694446	0.0923028	0.0928188	0.115402	0.0819516	0.0671587	0.115985	0.0831119	cyclin-H-like
LOC121412352	0.705147	0.87255	0.948012	0.859442	0.766925	1.29633	0.887913	0.69397	cyclin-I-like
LOC121425323	0.00904248	0.0164807	0.00438739	0.0126465	0.0112055	0.00434145	0	0	cyclin-J-like
LOC121418540	0.0409719	0.02662	0.0311452	0.0288369	0.0514392	0.0404863	0.0900083	0.0355838	cyclin-K-like
LOC121427906	0.278421	0.770662	0.599045	0.333167	0.505161	0.226639	0.496971	0.611525	cyclin-L1-like
LOC121410950	0.040927	0.083921	0.0565699	0.0676831	0.0635581	0.056179	0.108646	0.0110862	cyclin-Q-like
LOC121410316	0.53501	1.01106	0.771893	0.786314	0.869173	0.579604	0.447669	0.57792	cyclin-T2-like
LOC121418372	0.0118454	0.037909	0.0358754	0.0208955	0.0136807	0.0195962	0.0365401	0	cyclin-Y-like_protein_1
LOC121419845	0.00377741	0.0198807	0.0244923	0.0209275	0.00779534	0.00601612	0.0311419	0.00936856	cyclin-Y-like_protein_1
LOC121405827	1.56228	2.4315	4.24902	1.93697	3.05414	1.26271	0.935059	2.15707	G1/S-specific_cyclin-D1-like
LOC121408084	0.143589	0.150953	0.107359	0.0801815	0.386021	0.0981107	0.27287	0.141421	G1/S-specific_cyclin-E
LOC121419378	0.0252497	0.067041	0.0261099	0.0492533	0.0538218	0.0341455	0.04067	0.111823	G2/mitotic-specific_cyclin_S13-7-like
LOC121409442	0.0477223	0.0346524	0.0145608	0.0251115	0.120173	0.0386493	0.0331933	0.0102793	G2/mitotic-specific_cyclin-A-like
LOC121410426	0.00247865	0.0412487	0.00469951	0.0257903	0.055504	0.00303866	0	0	G2/mitotic-specific_cyclin-A-like
LOC121429467	0.168812	0.204964	0.0638085	0.126277	0.635966	0.043261	0.183309	0.349859	G2/mitotic-specific_cyclin-B3-like
LOC121416277	0.0992093	0.104987	0.0702228	0.108082	0.274776	0.0458288	0.187445	0.173639	G2/mitotic-specific_cyclin-B-like
LOC121410158	0.0818218	0.0810993	0.0399313	0.056291	0.129819	0.0396806	0.0339602	0.122025	G2_and_S_phase-expressed_protein_1-like
LOC121429452	0.171929	0.176946	0.109574	0.13169	0.396328	0.0999959	0.148089	0.218283	DNA_polymerase_alpha_catalytic_subunit-like
LOC121418141	0.083381	0.0927854	0.0497209	0.0786041	0.249169	0.0521906	0.101476	0.111796	DNA_polymerase_alpha_subunit_B-like
LOC121431843	0.0273095	0.0218767	0.0332138	0.0481467	0.0217101	0.0401132	0.208954	0.0657212	DNA_polymerase_beta-like
LOC121421151	0.103232	0.109821	0.0975782	0.111594	0.217067	0.0879609	0.0914315	0.0273353	DNA_polymerase_delta_catalytic_subunit-like
LOC121422360	0.025666	0.0563242	0.0568667	0.0504447	0.0931859	0.0501239	0.104492	0.0501801	DNA_polymerase_delta_subunit_2-like
LOC121429881	0.496269	0.460549	0.458244	0.577109	0.845513	0.385374	0.298016	0.553139	DNA_polymerase_delta_subunit_3-like
LOC121408448	0.82994	0.793297	0.916316	0.692838	0.578328	0.782644	0.763327	0.945537	DNA_polymerase_delta_subunit_4-like
LOC121408512	0.0325307	0.0554804	0.0429187	0.0340584	0.0306036	0.0432997	0.0632487	0.0546584	DNA_polymerase_delta_subunit_4-like
LOC121419874	0.0181241	0.0173802	0.0170947	0.0166977	0.106578	0.00559302	0.0962323	0.130668	DNA_polymerase_epsilon_catalytic_subunit_A-like
LOC121418907	0.0294614	0.0221214	0.00291488	0.00438252	0.0891307	0.00174828	0.0361407	0.00936856	DNA_polymerase_epsilon_subunit_2-like
LOC121428701	0.334246	0.183466	0.188837	0.272732	0.517413	0.21422	0.190744	0.132606	DNA_polymerase_epsilon_subunit_3-like
LOC121423997	0.0617895	0.0411816	0.0574564	0.048126	0.201226	0.0755544	0.0902204	0.108895	DNA_polymerase_epsilon_subunit_4-like
LOC121418400	0.0156448	0.0126724	0.0100619	0.0139983	0.0350013	0.00939904	0	0.063674	DNA_polymerase_eta-like
LOC121415721	0.0109083	0.010021	0.0175787	0.0462443	0.0206916	0.0238976	0.0484567	0.109456	DNA_polymerase_iota-like
LOC121415844	0.0410403	0.0286432	0.058029	0.0711281	0.0344196	0.0222155	0.00888205	0.133401	DNA_polymerase_iota-like
LOC121415332	0.0742689	0.0987249	0.0712002	0.0724789	0.12735	0.0645704	0.0615747	0.104787	DNA_polymerase_kappa-like
LOC121413377	0.00440488	0.0146059	0.00949382	0.000829889	0.0385479	0.00703666	0	0.0160903	DNA_polymerase_theta-like
LOC121431754	0.389501	0.329236	0.150483	0.184084	1.20584	0.140776	0.247551	0.343852	proliferating_cell_nuclear_antigen-like
LOC121417436	3.59652	3.17878	3.95072	4.18248	5.37598	2.81949	2.56045	2.6103	proliferation-associated_protein_2G4-like
LOC121429790	0.00387641	0.0271336	0.00989711	0.0271956	0.0288294	0.00899231	0.0348322	0	telomerase_reverse_transcriptase-like (TERT)
LOC121430677	0.501572	0.80812	1.28915	0.588632	0.90678	0.387375	0.207275	0.688109	myc_protein-like
Total Expression	13.6589	16.8882	17.985	14.9587	22.183	11.8292	14.222	15.3991
Cilia Markers
LOC121408954	0.784352	0.749317	0.833726	0.659302	0.479002	0.900416	0.723166	0.502011	tektin-1-like
LOC121423323	0.0481821	0.0581123	0.0587561	0.0693297	0.0492082	0.116047	0.0683397	0.0593787	tektin-3-like
LOC121423108	0.141267	0.142437	0.115618	0.1098	0.056565	0.249108	0.051659	0.204018	tektin-4-like
LOC121430708	0.456572	0.497443	0.617961	0.537952	0.359038	0.822951	0.165733	0.648012	tektin-B1-like
LOC121410831	0.197586	0.19571	0.188412	0.20766	0.196442	0.245647	0.22231	0.160021	cilia-_and_flagella-associated_protein_100-like
LOC121428704	0.137746	0.0802234	0.161572	0.112808	0.108261	0.11673	0.154015	0.410309	cilia-_and_flagella-associated_protein_157-like
LOC121407266	0.0226114	0.0117896	0.0171941	0.0237779	0.0239339	0.0318909	0.00694175	0.0102793	cilia-_and_flagella-associated_protein_20
LOC121407328	0.0100914	0.0293316	0.0158207	0.0247886	0.0227964	0.0278916	0	0	cilia-_and_flagella-associated_protein_20
LOC121425120	0.0202766	0.042388	0.0321563	0.034331	0.0137523	0.0397275	0.00313783	0.0572001	cilia-_and_flagella-associated_protein_206-like
LOC121407265	0	0.00932953	0.00344371	0	0.00108275	0.0106246	0	0	cilia-_and_flagella-associated_protein_20-like
LOC121426156	0.0472816	0.0706948	0.0479694	0.0372539	0.0311039	0.0427793	0	0.0226565	cilia-_and_flagella-associated_protein_221-like
LOC121409153	0.136768	0.296223	0.266606	0.251814	0.172517	0.148395	0.216768	0.253342	cilia-_and_flagella-associated_protein_251-like
LOC121426620	0.0442083	0.0332405	0.0239321	0.0267574	0.00848259	0.0417257	0.0695882	0.00746589	cilia-_and_flagella-associated_protein_251-like
LOC121413236	0.0101191	0.0256929	0.0168379	0.0300894	0.0213151	0.00861897	0	0	cilia-_and_flagella-associated_protein_298-like
LOC121431907	0.0697319	0.0520153	0.0524048	0.0848746	0.0429501	0.0798791	0	0.0189233	cilia-_and_flagella-associated_protein_299-like
LOC121429496	0.0204266	0.0190681	0.0040964	0.0257615	0.0352206	0.00714557	0	0.0329299	cilia-_and_flagella-associated_protein_300-like
LOC121418368	1.02922	0.980346	1.46801	0.921895	0.989558	1.53494	1.1402	1.19556	cilia-_and_flagella-associated_protein_36-like
LOC121410594	0.247091	0.246328	0.154606	0.263193	0.237102	0.275261	0.362738	0.0648121	cilia-_and_flagella-associated_protein_410-like
LOC121424756	0.0318404	0.0550263	0.0355701	0.0280796	0.0237655	0.0606737	0.0349241	0	cilia-_and_flagella-associated_protein_43-like
LOC121420304	0.395254	0.356819	0.643835	0.335432	0.289673	0.402733	0.220652	0.309523	cilia-_and_flagella-associated_protein_45-like
LOC121424906	0.0623886	0.145588	0.0734716	0.0918146	0.0470887	0.018042	0.106897	0.0301761	cilia-_and_flagella-associated_protein_46-like
LOC121413871	0.00435763	0.0154388	0.00608073	0.00813566	0.0016836	0.00521873	0	0	cilia-_and_flagella-associated_protein_47-like
LOC121422444	0.270835	0.252956	0.355918	0.292299	0.231325	0.216629	0.181488	0.103496	cilia-_and_flagella-associated_protein_52-like
LOC121416078	0.0943993	0.113654	0.137587	0.0995896	0.0722273	0.108437	0.0870809	0.20912	cilia-_and_flagella-associated_protein_53-like
LOC121416185	0.149072	0.12031	0.220624	0.16624	0.0897301	0.151173	0.138557	0.181167	cilia-_and_flagella-associated_protein_53-like
LOC121411757	0.00785259	0.0271068	0.01244	0.00915572	0.0179481	0.00209162	0.0390334	0.0558167	cilia-_and_flagella-associated_protein_54-like
LOC121423609	0.0590604	0.0668642	0.0736932	0.0597659	0.03475	0.0898906	0.055251	0.0208713	cilia-_and_flagella-associated_protein_57-like
LOC121424796	0.0888197	0.0941116	0.110582	0.0968116	0.0862466	0.12613	0.0397521	0.146321	cilia-_and_flagella-associated_protein_58-like
LOC121418301	0.00260981	0.0236535	0.0131364	0.00393143	0.0273541	0.0118287	0	0	cilia-_and_flagella-associated_protein_61-like
LOC121425818	0.0483442	0.0671584	0.069461	0.0542824	0.0675729	0.0485394	0.087975	0.0904298	cilia-_and_flagella-associated_protein_65-like
LOC121426561	0.027533	0.0474714	0.0414832	0.0312321	0.0481756	0.0557768	0.0409805	0.0342407	cilia-_and_flagella-associated_protein_69-like
LOC121419134	0.319804	0.350229	0.377799	0.247644	0.272803	0.28663	0.359143	0.44795	cilia-_and_flagella-associated_protein_70-like
LOC121428207	0.0940584	0.126148	0.116694	0.130466	0.0824476	0.0733341	0.0939973	0.0498108	cilia-_and_flagella-associated_protein_74-like
LOC121429102	0.119896	0.127155	0.19977	0.0793134	0.0634688	0.14121	0.146084	0.211138	cilia-_and_flagella-associated_protein_77-like
LOC121420140	0.0723224	0.174743	0.15306	0.0984484	0.0652453	0.0579824	0.0701887	0.0858007	cilia-_and_flagella-associated_protein_91-like
LOC121410045	0.0189324	0.0324165	0.00892232	0.0148871	0.0389101	0.0146919	0	0	cilia-_and_flagella-associated_protein_97-like
LOC121424926	0.626131	0.618086	0.632272	0.479155	0.583326	0.760886	0.980183	0.21381	cilia-_and_flagella-associated_protein_99-like
LOC121420415	0.0420876	0.033899	0.0751723	0.0438607	0.0517638	0.0394064	0.0335292	0.00976515	cilia-_and_flagella-associated_protein_HOATZ-like
LOC121424851	0.0544155	0.110954	0.0621685	0.0766308	0.0326555	0.018964	0.140977	0.0137301	ciliary-associated_calcium-binding_coiled-coil_protein_1-like
LOC121424379	0.0303621	0.0780502	0.0307987	0.0602508	0.0344427	0.0262105	0.115445	0.0226565	ciliogenesis_and_planar_polarity_effector_1-like
LOC121407951	0.0497333	0.0371074	0.0476142	0.0457375	0.0739842	0.0697821	0.0305838	0.023084	ciliogenesis_and_planar_polarity_effector_2-like
LOC121426192	0.373795	0.493619	0.381016	0.440925	0.459474	0.396051	0.36366	0.180113	ciliogenesis-associated_TTC17-interacting_protein-like
LOC121418980	0.0988597	0.0658158	0.12953	0.0923399	0.100675	0.146899	0.0546726	0.0582849	33_kDa_inner_dynein_arm_light_chain,_axonemal
LOC121420563	0.0494722	0.0386919	0.103358	0.0619161	0.0772926	0.0838207	0.05196	0.202823	33_kDa_inner_dynein_arm_light_chain,_axonemal
LOC121417453	0.0403158	0.0323259	0.0324921	0.041756	0.0390292	0.0254502	0	0.045489	dynein_assembly_factor_1,_axonemal-like
LOC121417498	0.0220599	0.0166856	0.0275657	0.0112617	0.0186219	0.0343418	0.0567231	0.0102793	dynein_assembly_factor_1,_axonemal-like
LOC121413277	0.0131971	0.0156852	0.0254229	0.0125054	0.0193002	0.0163066	0.0364144	0	dynein_assembly_factor_3,_axonemal-like
LOC121415243	0.0990559	0.162482	0.101433	0.127515	0.135076	0.110328	0.118478	0.123057	dynein_assembly_factor_4,_axonemal-like
LOC121408229	0.0265005	0.0284218	0.0322024	0.0291626	0.0405351	0.0457518	0.0777405	0.134037	dynein_assembly_factor_6,_axonemal-like
LOC121419901	0.045337	0.0956932	0.0501906	0.0560682	0.0535401	0.0577086	0.0867711	0	dynein_axonemal-associated_protein_1-like
LOC121422823	0.14148	0.273004	0.219655	0.17005	0.155706	0.176257	0.0983692	0.318826	dynein_beta_chain,_ciliary
LOC121420510	0.00136995	0.0336681	0.0284794	0.00236525	0.0264773	0.0277309	0.100846	0.107497	dynein_beta_chain,_flagellar_outer_arm-like
LOC121419755	0.00365193	0.0160522	0.0128135	0	0.00796901	0.00897519	0	0	dynein_beta_chain,_flagellar_outer_arm-like
LOC121422261	0.0640044	0.112365	0.0777315	0.0512603	0.0686613	0.0771469	0.0338083	0.00626419	dynein_heavy_chain_1,_axonemal-like
LOC121408397	0.0122499	0.0318005	0.0262281	0.0161129	0.021344	0.0223692	0	0.158713	dynein_heavy_chain_10,_axonemal-like
LOC121408461	0.0470279	0.0898926	0.0621768	0.032574	0.033097	0.0422443	0.174819	0.143861	dynein_heavy_chain_10,_axonemal-like
LOC121410131	0.00524924	0.014189	0.0296361	0.0110103	0.0188202	0.0321522	0.106643	0	dynein_heavy_chain_12,_axonemal-like
LOC121410141	0.0194179	0.0232912	0.0346163	0.0401689	0.00802403	0.0146966	0.115909	0.0329299	dynein_heavy_chain_12,_axonemal-like
LOC121429563	0.0881573	0.157894	0.134134	0.0739545	0.0748008	0.10474	0.12268	0.240296	dynein_heavy_chain_2,_axonemal-like
LOC121410272	0.107104	0.369105	0.171533	0.21697	0.129066	0.179871	0.135311	0.245053	dynein_heavy_chain_3,_axonemal-like
LOC121422358	0.0841258	0.223197	0.103221	0.0655811	0.0805427	0.202368	0.170198	0.202652	dynein_heavy_chain_3,_axonemal-like
LOC121408153	0.162867	0.461072	0.307832	0.219897	0.174346	0.198396	0.216078	0.242659	dynein_heavy_chain_5,_axonemal-like
LOC121413891	0.0316401	0.134478	0.0440329	0.0426915	0.0440673	0.0547232	0.0327877	0.113997	dynein_heavy_chain_5,_axonemal-like
LOC121413974	0.0213972	0.0616692	0.0448178	0.0217462	0.0157605	0.0405563	0.0466991	0	dynein_heavy_chain_5,_axonemal-like
LOC121409928	0.0164242	0.0110119	0.00539227	0.00762901	0.00438128	0.00848699	0	0	dynein_heavy_chain_6,_axonemal-like
LOC121409978	0.0418432	0.079834	0.0802313	0.0343315	0.0499707	0.0860691	0.0842443	0.322043	dynein_heavy_chain_6,_axonemal-like
LOC121419079	0.0487422	0.158616	0.0534656	0.0221068	0.0743904	0.0167392	0.0528202	0	dynein_heavy_chain_6,_axonemal-like
LOC121423875	0.259336	0.411505	0.374847	0.24582	0.206668	0.291881	0.351844	0.438626	dynein_heavy_chain_7,_axonemal-like
LOC121413912	0.0267841	0.0853152	0.067153	0.0539112	0.0243897	0.0373159	0.0199022	0.0198719	dynein_heavy_chain_8,_axonemal-like
LOC121415364	0.0230634	0.17974	0.062816	0.0469601	0.0573318	0.0552753	0.111336	0.0335267	dynein_heavy_chain_8,_axonemal-like
LOC121415092	0.057689	0.0762749	0.159934	0.0748075	0.0832698	0.0862706	0.0783542	0.045157	dynein_intermediate_chain_2,_ciliary
LOC121423597	0.0965961	0.119648	0.147953	0.103275	0.0896299	0.0834401	0.0816784	0.200697	dynein_intermediate_chain_3,_axonemal-like
LOC121422702	0.0604751	0.102061	0.0762615	0.0972786	0.0759644	0.113536	0.122719	0.0637653	dynein_intermediate_chain_3,_ciliary-like
LOC121422099	0.251243	0.238989	0.184337	0.181957	0.246959	0.21954	0.128026	0.214586	dynein_intermediate_chain_CFAP94,_axonemal-like
LOC121418439	0.132737	0.091417	0.099523	0.108369	0.10732	0.191849	0.0892145	0.167298	dynein_light_chain_1,_axonemal-like
LOC121422197	0.0351744	0.0303827	0.0231833	0.0139874	0.0368492	0.060078	0.0092329	0.00976515	dynein_light_chain_4,_axonemal-like
Total Expression	8.70209	11.1505	11.0925	8.80282	8.04427	10.8354	9.51726	9.98799
Miscellaneous Growth Factors (and other genes) of Interest
LOC121405581	0.200735	0.215753	0.145659	0.164943	0.130616	0.142589	0.0383469	0.0701385	bone_morphogenetic_protein_1_homolog
LOC121431952	0.350717	0.511167	0.366124	0.417228	0.424931	0.472356	0.273843	0.347881	bone_morphogenetic_protein_receptor_type-1B-like
LOC121411232	0.115067	0.199966	0.094829	0.180955	0.123145	0.182605	0.0589344	0.0790789	bone_morphogenetic_protein_receptor_type-2-like
LOC121424566	0.0468527	0.079184	0.0499756	0.0397736	0.0367839	0.0320098	0.100258	0.20846	growth/differentiation_factor_8-like
LOC121423913	0.90939	1.17714	0.603597	0.52804	0.611115	1.18693	1.25435	0.482657	growth/differentiation_factor_8-like
LOC121426703	0.0597426	0.0226062	0.0154111	0.00770518	0.0185821	0.0457977	0.0899158	0	growth/differentiation_factor_8-like
LOC121415689	0	0.00169925	0.00169206	0.00276601	0.00183025	0	0	0	insulin-like_peptide_receptor
LOC121414981	0	0.00912696	0.00178872	0.0054349	0.00194264	0	0	0	insulin-like_peptide_receptor
LOC121415946	0.00942792	0.0154572	0.00430222	0.00554479	0	0	0	0	fibroblast_growth_factor_receptor_2-like
LOC121419550	0	0.00380506	0.00135389	0	0.00303581	0	0	0	fibroblast_growth_factor_receptor_3-like
LOC121425598	0.462301	0.989365	0.459335	0.578986	0.61673	0.524813	0.613886	0.658698	fibroblast_growth_factor_receptor-like
LOC121425416	0.0239755	0.0323864	0.0242933	0.0174166	0.0267548	0.0281153	0	0	fibroblast_growth_factor_receptor-like_1
LOC121405695	0	0.00326179	0.000611444	0	0.0016844	0	0	0	epidermal_growth_factor_receptor-like
LOC121428788	0.635829	0.625001	0.44049	0.22521	0.215073	0.79493	0.770313	4.50091	major_yolk_protein-like
LOC121428736	4.85211	4.28494	4.84106	1.8046	1.99686	7.21295	4.04993	39.2211	major_yolk_protein-like

## Sheet: AllClusters Diff Expression
Table S2 – Single-cell RNA sequencing of L. variegatus cell culture spheroids - Differential gene expression in each cluster relative to all other clusters (log2 fold change)
FeatureName	p_val	avg_log2FC	pct.1	pct.2	p_val_adj	cluster	Gene Description
LOC121418514	0	-2.54403	0.839	0.988	0	0	uncharacterized_LOC121418514
LOC121415203	1.82e-186	-1.41353	0.169	0.593	3.21e-182	0	E3_ubiquitin-protein_ligase_arih1-like
LOC121405859	4.57e-178	-1.33053	0.132	0.548	8.07e-174	0	uncharacterized_LOC121405859
LOC121431891	3.83e-140	-1.24576	0.064	0.387	6.75e-136	0	uncharacterized_LOC121431891
LOC121429542	1.2e-136	-0.894782	0.138	0.51	2.11e-132	0	muscleblind-like_protein_3
LOC121431622	2.59e-134	-1.20049	0.14	0.493	4.57e-130	0	uncharacterized_LOC121431622
LOC121407069	3.31e-128	0.327349	1	1	5.85e-124	0	fibropellin-3-like
LOC121424790	2.34e-116	-0.899368	0.052	0.331	4.12e-112	0	uncharacterized_LOC121424790
LOC121406199	1.07e-114	-0.759706	0.137	0.475	1.89e-110	0	cryptochrome-1-like
LOC121426401	3.25e-114	-1.00751	0.036	0.299	5.74e-110	0	rho_GTPase-activating_protein_27-like
LOC121432239	6.43e-109	0.287592	0.998	0.994	1.13e-104	0	fatty_acid-binding_protein_Fh15-like
LOC121406318	1.1e-104	-0.914957	0.1	0.39	1.94e-100	0	trichohyalin-like
LOC121426068	6.82e-101	-0.696223	0.053	0.311	1.2e-96	0	ATP-dependent_translocase_ABCB1-like
LOC121423785	8.96e-100	-0.756595	0.04	0.284	1.58e-95	0	Krueppel-like_factor_6
LOC121415989	7.12e-98	-0.68562	0.122	0.42	1.26e-93	0	transcription_factor_HIVEP3-like
LOC121427508	2.22e-96	0.341059	0.989	0.989	3.92e-92	0	uncharacterized_LOC121427508
LOC121406364	4.61e-96	-0.715255	0.166	0.482	8.14e-92	0	uncharacterized_LOC121406364
LOC121413578	4.37e-95	-1.16933	0.081	0.338	7.72e-91	0	uncharacterized_LOC121413578
LOC121410256	1.61e-94	-0.899666	0.163	0.458	2.84e-90	0	rho-related_protein_racA-like
LOC121423262	3.78e-94	-0.860698	0.101	0.374	6.67e-90	0	chromobox_protein_homolog_8-like
LOC121423143	1.21e-93	-0.773505	0.122	0.408	2.13e-89	0	fascin-like
LOC121405875	6.36e-92	-0.689292	0.073	0.33	1.12e-87	0	F-actin-monooxygenase_MICAL3-like
LOC121411746	9.21e-91	-0.706668	0.11	0.384	1.62e-86	0	sodium-_and_chloride-dependent_GABA_transporter_1-like
LOC121430760	1.71e-90	-1.21919	0.236	0.502	3.01e-86	0	actin_CyI,_cytoplasmic-like
LOC121423647	1.21e-89	-0.753047	0.216	0.533	2.14e-85	0	transcription_factor_AP-1-like
LOC121426430	3.45e-89	-0.599771	0.094	0.361	6.08e-85	0	trichohyalin-like
LOC121411918	9.82e-88	-0.651404	0.111	0.384	1.73e-83	0	protein_diaphanous_homolog_2-like
LOC121415187	1.03e-87	-0.639509	0.091	0.352	1.81e-83	0	histone-lysine_N-methyltransferase_ASH1L-like
LOC121411556	2.64e-87	-0.662455	0.17	0.474	4.65e-83	0	thyrotroph_embryonic_factor-like
LOC121425027	1.26e-85	-0.862658	0.063	0.295	2.22e-81	0	F-box/LRR-repeat_protein_2-like
LOC121427237	3.84e-85	-0.548279	0.083	0.337	6.78e-81	0	uncharacterized_LOC121427237
LOC121425834	3.56e-82	-0.693417	0.047	0.264	6.28e-78	0	muscle_M-line_assembly_protein_unc-89-like
LOC121423762	1.49e-80	-0.905551	0.496	0.785	2.62e-76	0	dnaJ_homolog_subfamily_B_member_4-like
LOC121417078	9.55e-80	0.296253	0.999	1	1.68e-75	0	calmodulin-like
LOC121410666	1.19e-79	-0.686529	0.441	0.737	2.09e-75	0	protein_BTG1-like
LOC121410833	2.11e-79	-0.535098	0.095	0.345	3.73e-75	0	KAT8_regulatory_NSL_complex_subunit_1-like
LOC121418762	3.86e-79	-0.773081	0.339	0.649	6.81e-75	0	fos-related_antigen_1-like
LOC121411767	4.61e-79	-0.463325	0.149	0.436	8.13e-75	0	uncharacterized_LOC121411767
LOC121422320	4.98e-79	-0.501585	0.108	0.365	8.79e-75	0	hornerin-like
LOC121424951	1.48e-78	-0.741866	0.068	0.292	2.6e-74	0	uncharacterized_LOC121424951
LOC121423022	3.59e-78	-0.655065	0.172	0.453	6.34e-74	0	mitogen-activated_protein_kinase_kinase_kinase_13-like
LOC121410067	7.38e-77	-0.543219	0.088	0.325	1.3e-72	0	ectopic_P_granules_protein_5_homolog
LOC121424436	4.96e-75	-0.893526	0.067	0.278	8.76e-71	0	sodium-_and_chloride-dependent_glycine_transporter_1-like
LOC121417463	5.05e-75	-0.556761	0.06	0.272	8.9e-71	0	uncharacterized_LOC121417463
LOC121415060	9.17e-75	-0.619341	0.094	0.329	1.62e-70	0	uncharacterized_LOC121415060
LOC121428399	2.95e-74	-0.850146	0.231	0.49	5.21e-70	0	actin_CyI,_cytoplasmic
LOC121428469	8.1e-74	-0.525388	0.064	0.279	1.43e-69	0	uncharacterized_LOC121428469
LOC121427485	8.78e-74	-0.38758	0.108	0.361	1.55e-69	0	uncharacterized_protein_C1orf50_homolog
LOC121422281	1.8e-73	-0.519218	0.313	0.657	3.17e-69	0	ATP-dependent_RNA_helicase_dbp2-like
LOC121423225	2.16e-73	-0.497759	0.135	0.397	3.81e-69	0	putative_RNA-binding_protein_Luc7-like_2
LOC121431291	1.55e-72	-0.501689	0.144	0.409	2.74e-68	0	iroquois-class_homeodomain_protein_irx-3-like
LOC121417020	1.86e-72	-0.519563	0.064	0.277	3.28e-68	0	rho_GTPase-activating_protein_35-like
LOC121411553	5.85e-72	-0.531962	0.244	0.552	1.03e-67	0	uncharacterized_LOC121411553
LOC121415564	6.29e-72	-0.487334	0.094	0.327	1.11e-67	0	chromodomain-helicase-DNA-binding_protein_2-like
LOC121422304	2.26e-71	-0.489172	0.061	0.27	3.98e-67	0	rab11_family-interacting_protein_3-like
LOC121422780	3.6e-70	-0.43661	0.2	0.494	6.36e-66	0	myosin-11-like
LOC121425739	1.18e-68	-0.443842	0.166	0.439	2.08e-64	0	TBC1_domain_family_member_14-like
LOC121415947	3.67e-68	-0.567482	0.208	0.488	6.47e-64	0	phosphatidate_phosphatase_LPIN3-like
LOC121409315	3.64e-66	-0.429239	0.088	0.307	6.42e-62	0	BTB/POZ_domain-containing_adapter_for_CUL3-mediated_RhoA_degradation_protein_3-like
LOC121409246	2.81e-65	-0.421769	0.102	0.328	4.96e-61	0	transcription_intermediary_factor_1-alpha-like
LOC121418320	3.1e-65	-0.445851	0.094	0.315	5.46e-61	0	putative_transcription_factor_p65_homolog
LOC121410002	6.47e-65	-0.416268	0.06	0.256	1.14e-60	0	dual_specificity_tyrosine-phosphorylation-regulated_kinase_2-like
LOC121428559	1.8e-64	-0.412354	0.067	0.266	3.17e-60	0	cell_division_cycle_and_apoptosis_regulator_protein_1-like
LOC121426187	3.12e-64	-0.740683	0.268	0.534	5.51e-60	0	uncharacterized_LOC121426187
LOC121406090	3.9e-64	-0.340129	0.183	0.464	6.88e-60	0	protein_phosphatase_1_regulatory_subunit_12B-like
LOC121407994	1.94e-63	-0.441652	0.074	0.277	3.42e-59	0	RNA-binding_protein_39-like
LOC121408055	2.19e-63	-0.404111	0.117	0.348	3.86e-59	0	core-binding_factor_subunit_beta-like
LOC121423799	2.7e-63	-0.597141	0.35	0.644	4.77e-59	0	MAP_kinase-interacting_serine/threonine-protein_kinase_1-like
LOC121415663	6.58e-63	-0.48387	0.101	0.318	1.16e-58	0	apoptotic_chromatin_condensation_inducer_in_the_nucleus-like
LOC121429222	8.96e-63	0.279003	0.945	0.934	1.58e-58	0	uncharacterized_LOC121429222
LOC121412919	1.48e-62	-0.456941	0.102	0.321	2.61e-58	0	protein_Shroom2-like
LOC121429030	2.82e-62	-0.575678	0.393	0.698	4.97e-58	0	immediate_early_response_gene_5-like_protein
LOC121414301	2.36e-61	-0.407641	0.115	0.341	4.16e-57	0	uncharacterized_LOC121414301
LOC121424717	6.42e-61	-0.382904	0.101	0.317	1.13e-56	0	uncharacterized_LOC121424717
LOC121418202	6.47e-61	-0.368101	0.07	0.266	1.14e-56	0	AT-rich_interactive_domain-containing_protein_4A-like
LOC121423744	1.81e-60	-0.435548	0.101	0.315	3.2e-56	0	Krueppel-like_factor_5
LOC121418303	1.89e-60	-0.377536	0.063	0.25	3.33e-56	0	kinesin-like_protein_KIF26B
LOC121415639	2.51e-60	-0.558886	0.08	0.276	4.42e-56	0	glutamate_receptor_1-like
LOC121415315	3.14e-60	-0.482853	0.18	0.432	5.54e-56	0	cyclic_AMP-responsive_element-binding_protein_3-like_protein_4
LOC121419174	6.41e-60	-0.383063	0.107	0.323	1.13e-55	0	RNA-binding_protein_25-like
LOC121426747	7.77e-60	-0.426212	0.1	0.311	1.37e-55	0	uncharacterized_LOC121426747
LOC121430517	7.86e-60	-0.401672	0.067	0.256	1.39e-55	0	microtubule-actin_cross-linking_factor_1-like
LOC121429708	1.09e-59	-0.324872	0.117	0.344	1.92e-55	0	importin_subunit_alpha-3-like
LOC121418486	1.09e-59	-0.492361	0.188	0.444	1.93e-55	0	RNA-binding_protein_Nova-1-like
LOC121424891	1.58e-59	-0.372978	0.138	0.374	2.79e-55	0	uncharacterized_LOC121424891
LOC121431598	6.17e-59	-0.348133	0.147	0.389	1.09e-54	0	coiled-coil_domain-containing_protein_6-like
LOC121405827	1.23e-58	-0.535731	0.213	0.463	2.17e-54	0	G1/S-specific_cyclin-D1-like
LOC121408794	1.34e-58	-0.395995	0.106	0.319	2.37e-54	0	clustered_mitochondria_protein_homolog
LOC121408782	2.13e-58	-0.330934	0.08	0.278	3.76e-54	0	helicase_domino-like
LOC121415035	3.16e-58	-0.419633	0.277	0.57	5.57e-54	0	rho_guanine_nucleotide_exchange_factor_18-like
LOC121408658	3.83e-58	-0.318987	0.114	0.334	6.76e-54	0	ubiquitin_carboxyl-terminal_hydrolase_32-like
LOC121411459	5.95e-58	-0.345175	0.128	0.355	1.05e-53	0	inactive_histone-lysine_N-methyltransferase_2E-like
LOC121411406	7.13e-58	-0.285089	0.118	0.341	1.26e-53	0	scaffold_attachment_factor_B2-like
LOC121418856	1.05e-57	-0.38704	0.074	0.264	1.85e-53	0	uncharacterized_LOC121418856
LOC121411899	1.55e-57	-0.425419	0.103	0.311	2.73e-53	0	ankyrin_repeat_domain-containing_protein_27-like
LOC121408906	3.17e-57	-0.434439	0.071	0.257	5.59e-53	0	active_breakpoint_cluster_region-related_protein-like
LOC121408832	1.36e-56	-0.34771	0.132	0.356	2.39e-52	0	rho_GTPase-activating_protein_26-like
LOC121408605	1.72e-56	-0.327517	0.079	0.27	3.03e-52	0	TBC1_domain_family_member_10B-like
LOC121415190	2.01e-56	-0.520931	0.351	0.653	3.54e-52	0	bcl-2-like_protein_2
LOC121419440	2.42e-56	-0.308581	0.113	0.329	4.27e-52	0	bromodomain_adjacent_to_zinc_finger_domain_protein_1A-like
LOC121410148	2.99e-56	-0.318157	0.188	0.451	5.28e-52	0	MAP_kinase-activated_protein_kinase_2-like
LOC121412046	3.58e-56	-0.35588	0.174	0.424	6.32e-52	0	uncharacterized_LOC121412046
LOC121428570	1.25e-55	-0.358343	0.191	0.449	2.21e-51	0	spliceosome_RNA_helicase_Ddx39b
LOC121431807	1.39e-55	-0.272278	0.098	0.303	2.45e-51	0	stress-activated_protein_kinase_JNK-like
LOC121418586	1.97e-55	-0.298986	0.183	0.441	3.48e-51	0	protein_phosphatase_1B-like
LOC121428321	5.41e-55	-0.329619	0.216	0.49	9.55e-51	0	ATP-binding_cassette_sub-family_C_member_4-like
LOC121417258	5.68e-55	-0.282065	0.109	0.32	1e-50	0	epidermal_growth_factor_receptor_kinase_substrate_8-like_protein_2
LOC121431809	9.78e-55	-0.288112	0.103	0.309	1.72e-50	0	ankyrin-2-like
LOC121425031	1.43e-54	-0.325963	0.163	0.402	2.52e-50	0	probable_JmjC_domain-containing_histone_demethylation_protein_2C
LOC121407400	1.91e-54	-0.320042	0.13	0.352	3.37e-50	0	apoptotic_chromatin_condensation_inducer_in_the_nucleus-like
LOC121410498	2.31e-54	-0.328204	0.159	0.397	4.07e-50	0	transcription_factor_E3-like
LOC121408202	5.81e-54	-0.393511	0.146	0.373	1.03e-49	0	A-kinase_anchor_protein_1,_mitochondrial-like
LOC121412862	1.62e-53	-0.266465	0.144	0.374	2.85e-49	0	transcriptional_regulator_ATRX_homolog
LOC121407947	6.46e-53	-0.260975	0.111	0.318	1.14e-48	0	terminal_nucleotidyltransferase_4A-like
LOC121424487	7.24e-53	-0.30777	0.08	0.264	1.28e-48	0
LOC121422447	1.43e-52	-0.280992	0.183	0.432	2.52e-48	0	LLGL_scribble_cell_polarity_complex_component_2-like
LOC121408910	1.71e-52	-0.28189	0.155	0.386	3.01e-48	0	dentin_sialophosphoprotein-like
LOC121409999	2.33e-52	-0.255287	0.096	0.292	4.11e-48	0	trichohyalin-like
LOC121427475	2.97e-52	-0.294974	0.251	0.533	5.25e-48	0	chromodomain-helicase-DNA-binding_protein_Mi-2_homolog
LOC121431052	3.54e-52	0.267014	0.996	0.994	6.24e-48	0	annexin_A13-like
LOC121411954	1.44e-51	-0.313734	0.115	0.318	2.55e-47	0	FYVE,_RhoGEF_and_PH_domain-containing_protein_6-like
LOC121424774	2.51e-51	-0.256217	0.091	0.281	4.43e-47	0	RING_finger_protein_44-like
LOC121428770	3.77e-51	-0.403264	0.079	0.255	6.65e-47	0	collagen_alpha-1(I)_chain-like
LOC121405677	1.32e-50	-0.270076	0.101	0.295	2.34e-46	0	SH3_and_multiple_ankyrin_repeat_domains_protein_3-like
LOC121414262	2.14e-50	-0.394241	0.13	0.336	3.77e-46	0	uncharacterized_LOC121414262
LOC121420405	3.25e-50	-0.310263	0.264	0.546	5.74e-46	0	ATP-dependent_RNA_helicase_cgh-1-like
LOC121422796	3.83e-50	-0.264297	0.099	0.29	6.75e-46	0	serrate_RNA_effector_molecule_homolog
LOC121410316	5.78e-50	-0.252238	0.08	0.258	1.02e-45	0	cyclin-T2-like
LOC121425891	7.74e-50	-0.255211	0.129	0.341	1.37e-45	0	kinesin_heavy_chain
LOC121424216	9.63e-50	-0.275926	0.077	0.253	1.7e-45	0	growth_arrest_and_DNA_damage-inducible_protein_GADD45_gamma-like
LOC121422412	4.58e-49	-0.257043	0.158	0.384	8.09e-45	0	WASH_complex_subunit_2-like
LOC121424125	2.28e-48	-0.296345	0.113	0.309	4.02e-44	0	protein_Wnt-6-like
LOC121430031	4.14e-48	-0.323324	0.104	0.29	7.3e-44	0	arginine_and_glutamate-rich_protein_1-like
LOC121429715	3.32e-47	-0.346202	0.114	0.304	5.86e-43	0	multidrug_resistance-associated_protein_5-like
LOC121409148	5.72e-47	-0.348485	0.108	0.294	1.01e-42	0	dentin_matrix_acidic_phosphoprotein_1-like
LOC121420333	1.29e-46	-0.288394	0.171	0.395	2.27e-42	0	uncharacterized_LOC121420333
LOC121425215	1.52e-46	-0.344034	0.113	0.301	2.69e-42	0	myosin_light_chain_kinase,_smooth_muscle-like
LOC121419232	5.33e-46	-0.273891	0.088	0.26	9.41e-42	0	spastin-like
LOC121422285	5.57e-46	-0.303901	0.226	0.478	9.83e-42	0	uncharacterized_LOC121422285
LOC121423991	1.11e-44	-0.322179	0.239	0.489	1.96e-40	0	next_to_BRCA1_gene_1_protein-like
LOC121410003	3.06e-44	-0.299687	0.208	0.445	5.39e-40	0	glutamine--tRNA_ligase-like
LOC121428518	3.29e-44	-0.308254	0.27	0.534	5.81e-40	0	far_upstream_element-binding_protein_1-like
LOC121428519	5.15e-44	-0.311226	0.245	0.493	9.08e-40	0	actin-15B
LOC121407057	8.06e-44	0.267073	0.992	0.989	1.42e-39	0	ADP/ATP_translocase_3-like
LOC121417745	1.11e-43	-0.256801	0.085	0.25	1.96e-39	0	la-related_protein_4-like
LOC121420380	3.12e-43	-0.378429	0.327	0.587	5.51e-39	0	protein_BTG3-like
LOC121411004	3.2e-43	-0.275093	0.103	0.277	5.64e-39	0	leucine-rich_repeats_and_immunoglobulin-like_domains_protein_3
LOC121418797	8e-43	-0.344199	0.414	0.699	1.41e-38	0	heterogeneous_nuclear_ribonucleoprotein_U-like_protein_1
LOC121412403	9.82e-42	-0.280324	0.203	0.429	1.73e-37	0	extracellular_matrix_protein_3
LOC121411747	1.39e-41	-0.255759	0.204	0.432	2.46e-37	0	sodium-_and_chloride-dependent_GABA_transporter_2-like
LOC121417224	2.85e-41	-0.301913	0.348	0.631	5.02e-37	0	pumilio_homolog_2-like
LOC121415634	5.24e-41	-0.376831	0.129	0.307	9.25e-37	0	glutamate_receptor_3-like
LOC121408340	4.96e-39	-0.53808	0.553	0.766	8.75e-35	0	CCAAT/enhancer-binding_protein_alpha-like
LOC121418990	8.88e-39	-0.275256	0.355	0.634	1.57e-34	0	polyadenylate-binding_protein_4-like
LOC121408550	3.25e-37	-0.276311	0.353	0.621	5.73e-33	0	GTP-binding_nuclear_protein_Ran-like
LOC121428833	1.29e-35	-0.771662	0.165	0.339	2.28e-31	0	heat_shock_70_kDa_protein_IV
LOC446166	3.1e-35	-0.258218	0.327	0.583	5.47e-31	0	embryonic_blastocoelar_extracellular_matrix_protein_precursor
LOC121419389	2.86e-34	-0.322079	0.406	0.665	5.05e-30	0	mRNA_decay_activator_protein_ZFP36L2-A-like
LOC121427349	6.08e-26	-0.34862	0.549	0.762	1.07e-21	0	cholinesterase_1-like
LOC121420440	2.12e-15	-0.314399	0.336	0.494	3.73e-11	0	cytochrome_P450_3A8-like
LOC121428219	1.34e-14	0.289694	0.806	0.86	2.36e-10	0	vesicle-associated_membrane_protein_3-like
LOC121422540	4.25e-13	0.434103	0.571	0.617	7.49e-09	0	uncharacterized_protein_K02A2.6-like
LOC121407392	1.39e-07	0.335473	0.589	0.702	0.00244656	0	subtilisin-chymotrypsin_inhibitor-2B-like
LOC121415209	0.0516881	0.293024	0.275	0.359	1	0	MAM_and_LDL-receptor_class_A_domain-containing_protein_1-like
LOC121419156	0.174288	0.276229	0.423	0.511	1	0	cytochrome_P450_3A24-like
LOC121415355	0.852546	0.268015	0.446	0.585	1	0	protein_disulfide-isomerase_A3-like
LOC121418514	0	1.81156	0.994	0.935	0	1	uncharacterized_LOC121418514
LOC121413087	7.69e-191	-0.56	0.979	0.997	1.36e-186	1	elongation_factor_1-alpha
LOC121428227	3.69e-167	-0.429175	1	1	6.51e-163	1	60S_ribosomal_protein_L11
LOC121428378	2.49e-157	-0.420109	0.991	0.999	4.4e-153	1	60S_ribosomal_protein_L35-like
LOC121411302	3.2e-148	-0.432558	0.995	1	5.64e-144	1	ATP_synthase_F(0)_complex_subunit_C1,_mitochondrial-like
LOC121415352	8.71e-135	-0.386756	0.999	1	1.54e-130	1	40S_ribosomal_protein_S17-like
LOC121426719	8e-133	-0.348181	0.997	1	1.41e-128	1	60S_ribosomal_protein_L37a-like
LOC121407061	3.65e-132	-0.415048	0.993	0.999	6.43e-128	1	60S_ribosomal_protein_L13-like
LOC121415608	1.96e-129	-0.366009	0.998	0.999	3.46e-125	1	60S_ribosomal_protein_L17-like
LOC121424994	6.03e-129	-0.497226	1	1	1.06e-124	1	uncharacterized_LOC121424994
LOC121423374	2.53e-126	-0.455721	0.995	0.999	4.47e-122	1	40S_ribosomal_protein_S2
LOC121420133	4.25e-124	-0.385408	0.999	1	7.51e-120	1	40S_ribosomal_protein_S19-like
LOC121425505	1.48e-122	-0.347902	0.999	1	2.6e-118	1	60S_ribosomal_protein_L26-like
LOC121421110	2.59e-120	-0.328681	1	1	4.57e-116	1	60S_ribosomal_protein_L27a-like
LOC121422207	9.61e-118	-0.284817	1	1	1.69e-113	1	40S_ribosomal_protein_S8-like
LOC121422403	2.21e-116	-0.316208	0.999	1	3.89e-112	1	60S_ribosomal_protein_L10-like
LOC121418982	6.47e-114	-0.336808	0.999	1	1.14e-109	1	ubiquitin-40S_ribosomal_protein_S27a
LOC121413357	2.25e-110	-0.38191	0.979	0.997	3.97e-106	1	40S_ribosomal_protein_S3a-like
LOC121431806	2.68e-109	-0.328688	0.996	1	4.73e-105	1	40S_ribosomal_protein_S24-like
LOC121431716	1.33e-106	-0.537849	0.819	0.954	2.35e-102	1	peptidyl-prolyl_cis-trans_isomerase
LOC121416174	1.26e-101	-0.362619	0.991	0.999	2.23e-97	1	60S_ribosomal_protein_L7-like
LOC121420109	2.9e-98	-0.319794	1	1	5.12e-94	1	60S_acidic_ribosomal_protein_P1-like
LOC121418169	8.6e-94	-0.32259	0.999	1	1.52e-89	1	ubiquitin-like_protein_FUBI
LOC121408650	5.99e-92	-0.304146	0.996	0.999	1.06e-87	1	60S_ribosomal_protein_L6-like
LOC121430882	1.78e-91	-0.337117	0.997	1	3.14e-87	1	40S_ribosomal_protein_S7-like
LOC121431687	4.71e-91	-0.387078	0.96	0.99	8.32e-87	1	voltage-dependent_anion-selective_channel_protein_2-like
LOC121409255	3.52e-88	-0.318811	0.999	1	6.2e-84	1	60S_ribosomal_protein_L23a-like
LOC121406033	1.33e-87	-0.293299	0.999	0.999	2.35e-83	1	60S_ribosomal_protein_L44-like
LOC121408801	2.05e-87	-0.266473	1	1	3.61e-83	1	60S_acidic_ribosomal_protein_P2-like
LOC121429387	2.18e-87	-0.275803	1	1	3.85e-83	1	40S_ribosomal_protein_S26-like
LOC121417612	1.14e-86	-0.297908	0.998	1	2.01e-82	1	40S_ribosomal_protein_S11-like
LOC121414299	6.66e-81	-0.300704	0.991	0.998	1.18e-76	1	60S_ribosomal_protein_L24-like
LOC121411428	1.55e-79	-0.353952	0.946	0.987	2.73e-75	1	nucleoside_diphosphate_kinase_A_2-like
LOC121411806	6.48e-79	-0.319389	0.998	0.999	1.14e-74	1	60S_ribosomal_protein_L18a-like
LOC121431925	1.66e-78	-0.307793	0.984	0.997	2.92e-74	1	60S_ribosomal_protein_L34-B-like
LOC121427485	5.66e-78	-0.441417	0.096	0.358	9.98e-74	1	uncharacterized_protein_C1orf50_homolog
LOC121422018	1.75e-76	-0.315506	0.985	0.997	3.09e-72	1	60S_acidic_ribosomal_protein_P0-like
LOC121429396	3.61e-75	-0.314935	0.985	0.998	6.37e-71	1	60S_ribosomal_protein_L35a-like
LOC121428872	2.33e-74	-0.281024	0.997	1	4.12e-70	1	60S_ribosomal_protein_L28-like
LOC121407423	3.68e-74	-0.38491	0.918	0.985	6.49e-70	1	40S_ribosomal_protein_S3-like
LOC121419906	2.73e-73	-0.467204	0.691	0.896	4.82e-69	1	ATP_synthase_subunit_g,_mitochondrial-like
LOC121417553	3.21e-72	-0.395816	0.835	0.956	5.66e-68	1	60S_ribosomal_protein_L15-like
LOC121407456	6.03e-71	-0.49079	0.343	0.689	1.06e-66	1	cytochrome_b-c1_complex_subunit_Rieske,_mitochondrial-like
LOC121405859	7.88e-71	1.2492	0.519	0.416	1.39e-66	1	uncharacterized_LOC121405859
LOC121416034	9.36e-70	-0.338469	0.964	0.99	1.65e-65	1	40S_ribosomal_protein_S15-like
LOC121431023	1.65e-69	-0.26527	0.999	0.999	2.92e-65	1	40S_ribosomal_protein_S20-like
LOC121422698	4.37e-69	-0.270764	0.995	0.999	7.72e-65	1	40S_ribosomal_protein_S15a
LOC121417536	3.8e-68	-0.376913	0.827	0.951	6.71e-64	1	60S_ribosomal_protein_L15-like
LOC121428155	3.88e-68	-0.313573	0.949	0.988	6.84e-64	1	eukaryotic_translation_initiation_factor_5A-1-like
LOC121412515	1.76e-66	-0.254977	0.999	1	3.1e-62	1	60S_ribosomal_protein_L21-like
LOC121431719	3.6e-66	-0.251747	0.999	1	6.35e-62	1	40S_ribosomal_protein_S14a
LOC121409137	1.39e-65	-0.416855	0.248	0.573	2.46e-61	1	NADH-ubiquinone_oxidoreductase_subunit_8-like
LOC121418926	1.64e-65	-0.357322	0.878	0.968	2.89e-61	1	uncharacterized_LOC121418926
LOC121429699	1.23e-63	-0.257897	1	1	2.16e-59	1	60S_ribosomal_protein_L8-like
LOC121428403	2.02e-62	-0.260615	0.995	0.998	3.56e-58	1	40S_ribosomal_protein_S18
LOC121405795	2.19e-62	-0.481784	0.386	0.707	3.86e-58	1	transmembrane_protein_258
LOC121410384	5.06e-61	-0.333483	0.193	0.482	8.93e-57	1	V-type_proton_ATPase_subunit_F-like
LOC121411554	1.08e-60	-0.250915	0.996	0.999	1.91e-56	1	60S_ribosomal_protein_L9-like
LOC121431891	2.47e-59	1.3977	0.4	0.274	4.36e-55	1	uncharacterized_LOC121431891
LOC121411735	6.16e-59	-0.272035	0.969	0.992	1.09e-54	1	60S_ribosomal_protein_L31-like
LOC121427560	1.31e-58	-0.258017	0.994	0.999	2.31e-54	1	60S_ribosomal_protein_L22
LOC121420210	1.61e-58	-0.398573	0.61	0.86	2.85e-54	1	ATP_synthase-coupling_factor_6,_mitochondrial-like
LOC121405971	2.05e-58	-0.282779	0.125	0.366	3.62e-54	1	39S_ribosomal_protein_L23,_mitochondrial-like
LOC121409076	4.92e-58	-0.29594	0.101	0.323	8.68e-54	1	prefoldin_subunit_6-like
LOC121426330	5.24e-58	-0.372871	0.765	0.921	9.24e-54	1	ATP_synthase_subunit_beta,_mitochondrial
LOC121426805	7.62e-58	-0.314478	0.142	0.391	1.35e-53	1	MICOS_complex_subunit_MIC27-like
LOC121422466	1.34e-57	-0.377965	0.292	0.619	2.37e-53	1	cytochrome_b-c1_complex_subunit_2,_mitochondrial-like
LOC121411826	1.37e-57	-0.327775	0.209	0.491	2.41e-53	1	mitochondrial_import_inner_membrane_translocase_subunit_Tim16-like
LOC121423762	5.54e-57	0.97002	0.716	0.708	9.77e-53	1	dnaJ_homolog_subfamily_B_member_4-like
LOC121415695	1.39e-56	-0.428209	0.363	0.685	2.45e-52	1	ATP_synthase_subunit_alpha,_mitochondrial-like
LOC121411551	2.37e-56	-0.269645	0.989	0.999	4.19e-52	1	40S_ribosomal_protein_S27-like
LOC121425624	3.06e-56	-0.325858	0.871	0.965	5.39e-52	1	uncharacterized_LOC121425624
LOC121407996	4.95e-56	-0.508317	0.637	0.856	8.73e-52	1	eukaryotic_translation_initiation_factor_2_subunit_2-like
LOC121422637	5.86e-56	-0.365179	0.823	0.954	1.03e-51	1	40S_ribosomal_protein_SA
LOC121411410	7.48e-56	-0.435745	0.249	0.527	1.32e-51	1	acidic_leucine-rich_nuclear_phosphoprotein_32_family_member_B-like
LOC121430846	7.62e-56	-0.393705	0.674	0.877	1.34e-51	1	cytochrome_c_oxidase_subunit_5B,_mitochondrial-like
LOC121416035	8.78e-56	-0.296028	0.176	0.442	1.55e-51	1	NADH-quinone_oxidoreductase_subunit_B-like
LOC121428855	4.02e-55	-0.323734	0.251	0.559	7.1e-51	1	60S_ribosomal_protein_L7a-like
LOC121415334	6.95e-55	-0.469675	0.425	0.713	1.23e-50	1	uncharacterized_LOC121415334
LOC121423659	8.89e-55	-0.376351	0.275	0.582	1.57e-50	1	peroxiredoxin-1-like
LOC121421443	1.63e-54	-0.251392	0.117	0.341	2.88e-50	1	NADH_dehydrogenase_[ubiquinone]_1_alpha_subcomplex_subunit_9,_mitochondrial-like
LOC121405821	2.74e-54	-0.346346	0.836	0.951	4.83e-50	1	60S_ribosomal_protein_L10a-like
LOC121423694	1.01e-53	-0.273918	0.112	0.333	1.78e-49	1	transcription_factor_BTF3_homolog_4-like
LOC121419088	1.07e-53	-0.255935	0.139	0.379	1.88e-49	1	glutaredoxin-related_protein_5,_mitochondrial-like
LOC121430679	3.13e-53	-0.337068	0.165	0.409	5.52e-49	1	eukaryotic_translation_initiation_factor_2_subunit_1-like
LOC121430536	1.55e-52	-0.346367	0.259	0.555	2.73e-48	1	myosin_regulatory_light_chain_2,_smooth_muscle_minor_isoform-like
LOC121415818	2.83e-52	-0.423303	0.403	0.706	4.99e-48	1	ATP_synthase_subunit_alpha,_mitochondrial-like
LOC121411830	3.41e-52	-0.259916	0.121	0.343	6.03e-48	1	proteasome_subunit_alpha_type-5-like
LOC121423109	3.57e-52	-0.308261	0.265	0.568	6.3e-48	1	NADH_dehydrogenase_[ubiquinone]_1_beta_subcomplex_subunit_10-like
LOC121410216	3.92e-52	-0.326953	0.25	0.542	6.91e-48	1	twinfilin-1-like
LOC121421007	1.04e-51	-0.365539	0.711	0.894	1.84e-47	1	ATPase_inhibitor_A,_mitochondrial-like
LOC121416923	1.79e-51	-0.289964	0.237	0.523	3.15e-47	1	profilin-like
LOC121418824	3.14e-51	-0.333589	0.767	0.938	5.54e-47	1	cytochrome_c_oxidase_subunit_7A2,_mitochondrial-like
LOC121418186	4.71e-51	-0.331319	0.317	0.638	8.31e-47	1	60S_ribosomal_protein_L30-like
LOC121415659	8.51e-51	-0.30648	0.23	0.509	1.5e-46	1	uncharacterized_LOC121415659
LOC121427426	8.77e-51	-0.450766	0.524	0.795	1.55e-46	1	prohibitin-2-like
LOC121414150	1.37e-50	-0.274976	0.143	0.373	2.42e-46	1	eukaryotic_translation_initiation_factor_1A,_Y-chromosomal-like
LOC121411121	1.89e-50	-0.38047	0.618	0.852	3.33e-46	1	60S_ribosomal_protein_L23
LOC121419073	2.57e-50	-0.311292	0.273	0.575	4.54e-46	1	uncharacterized_LOC121419073
LOC121411709	6.31e-50	-0.252583	0.154	0.39	1.11e-45	1	uncharacterized_LOC121411709
LOC121423030	9.1e-50	-0.376918	0.58	0.83	1.61e-45	1	ATP_synthase_subunit_d,_mitochondrial-like
LOC121418955	1e-49	-0.33169	0.774	0.926	1.76e-45	1	uncharacterized_LOC121418955
LOC121411460	1.31e-49	-0.275083	0.196	0.458	2.32e-45	1	pyruvate_dehydrogenase_E1_component_subunit_beta,_mitochondrial-like
LOC121428158	1.37e-49	-0.384892	0.431	0.737	2.42e-45	1	cytochrome_b-c1_complex_subunit_7-like
LOC121411010	4.87e-49	-0.319736	0.279	0.578	8.6e-45	1	NADH_dehydrogenase_[ubiquinone]_1_alpha_subcomplex_subunit_5-like
LOC121425394	8.18e-49	-0.350587	0.71	0.888	1.44e-44	1	uncharacterized_LOC121425394
LOC121418432	1.5e-48	-0.263845	0.198	0.453	2.65e-44	1	glycine-rich_RNA-binding_protein_1-like
LOC121422462	3.8e-48	-0.38752	0.414	0.711	6.71e-44	1	prohibitin-like
LOC121426908	6.27e-48	-0.368453	0.553	0.81	1.11e-43	1	insulin-like_growth_factor_2_mRNA-binding_protein_3
LOC121424922	8.22e-48	-0.378136	0.508	0.789	1.45e-43	1	small_nuclear_ribonucleoprotein_G-like
LOC121427466	1.33e-47	-0.397055	0.537	0.809	2.34e-43	1	glyceraldehyde-3-phosphate_dehydrogenase-like
LOC121426055	1.43e-47	-0.382984	0.637	0.869	2.52e-43	1	cytochrome_c-like
LOC121415038	1.63e-47	-0.270306	0.12	0.326	2.88e-43	1	mitochondrial_import_inner_membrane_translocase_subunit_TIM44-like
LOC121411171	2.82e-47	-0.356123	0.634	0.863	4.98e-43	1	60S_ribosomal_protein_L23
LOC121410947	3.01e-47	-0.278013	0.231	0.501	5.31e-43	1	high_mobility_group_protein_1_homolog
LOC121418700	4.68e-47	-0.405737	0.484	0.759	8.26e-43	1	elongation_factor_1-gamma-like
gene-DR311-mgr02	6.51e-47	0.297835	1	1	1.15e-42	1
LOC121423705	1.54e-46	-0.32987	0.782	0.931	2.71e-42	1	profilin-like
LOC121425022	2.8e-46	-0.254648	0.105	0.299	4.95e-42	1	dihydropteridine_reductase-like
LOC121408550	5.85e-46	-0.386569	0.333	0.62	1.03e-41	1	GTP-binding_nuclear_protein_Ran-like
LOC121423024	7.4e-46	-0.349279	0.408	0.715	1.3e-41	1	acyl_carrier_protein,_mitochondrial-like
LOC121411555	1.21e-45	-0.319379	0.758	0.914	2.13e-41	1	uncharacterized_LOC121411555
LOC121431277	2.21e-45	-0.304777	0.813	0.944	3.9e-41	1	cytochrome_b-c1_complex_subunit_8-like
LOC121417095	2.28e-45	-0.260653	0.24	0.509	4.03e-41	1	APOBEC1_complementation_factor-like
LOC121413743	3.02e-45	-0.264608	0.094	0.278	5.33e-41	1	cystatin-A2-like
LOC121422297	3.08e-45	-0.27409	0.975	0.994	5.44e-41	1	60S_ribosomal_protein_L18-like
LOC121429460	6.51e-45	-0.357786	0.495	0.786	1.15e-40	1	translationally-controlled_tumor_protein_homolog
LOC121415228	7.35e-45	-0.261504	0.979	0.994	1.3e-40	1	60S_ribosomal_protein_L36-like
LOC121414451	8.16e-45	-0.359472	0.432	0.729	1.44e-40	1	40S_ribosomal_protein_S4-like
LOC121414272	1.32e-44	-0.290883	0.247	0.515	2.32e-40	1	eukaryotic_translation_initiation_factor_2_subunit_3
LOC121417735	4.03e-43	-0.287953	0.298	0.589	7.11e-39	1	eukaryotic_translation_initiation_factor_1-like
gene-DR311-mgr01	6.72e-43	0.265859	1	1	1.19e-38	1
LOC121407613	7.5e-42	-0.259587	0.26	0.526	1.32e-37	1	dehydrogenase/reductase_SDR_family_member_1-like
LOC121428377	1.01e-41	-0.265351	0.328	0.632	1.78e-37	1	actin-related_protein_2/3_complex_subunit_5-A-like
LOC121429862	1.28e-41	-0.297154	0.374	0.687	2.26e-37	1	uncharacterized_LOC121429862
LOC121422490	1.27e-40	-0.284518	0.833	0.944	2.23e-36	1	cytochrome_c_oxidase_subunit_6B1-like
LOC121415203	7.17e-40	0.998857	0.533	0.467	1.27e-35	1	E3_ubiquitin-protein_ligase_arih1-like
LOC121423147	1.44e-39	-0.325965	0.447	0.741	2.53e-35	1	NADH_dehydrogenase_[ubiquinone]_1_alpha_subcomplex_subunit_6-like
LOC121416918	2.08e-39	-0.290126	0.761	0.921	3.67e-35	1	60S_ribosomal_protein_L12-like
LOC121426629	4.52e-39	-0.253335	0.222	0.458	7.98e-35	1	hydroxyacid_oxidase_1-like
LOC121410604	5.13e-39	-0.316711	0.309	0.573	9.04e-35	1	serine--tRNA_ligase,_cytoplasmic-like
LOC121428698	5.65e-39	-0.342275	0.556	0.803	9.97e-35	1	60S_ribosomal_protein_L7a-like
LOC121414416	6e-39	-0.288777	0.768	0.924	1.06e-34	1	40S_ribosomal_protein_S4-like
LOC121418990	3.69e-38	-0.270381	0.34	0.631	6.51e-34	1	polyadenylate-binding_protein_4-like
LOC121410517	1.18e-37	-0.276448	0.368	0.655	2.08e-33	1	ras-related_protein_Rab-7a-like
LOC121410523	3.61e-37	-0.27239	0.377	0.677	6.36e-33	1	ubiquitin-conjugating_enzyme_E2_N-like
LOC121418762	5.45e-37	0.834803	0.592	0.561	9.62e-33	1	fos-related_antigen_1-like
LOC121415204	8.32e-37	-0.272176	0.797	0.943	1.47e-32	1	cytochrome_c_oxidase_subunit_5A,_mitochondrial-like
LOC121424525	9.32e-37	-0.276768	0.817	0.935	1.64e-32	1	uncharacterized_LOC121424525
LOC121408814	1.05e-36	-0.354984	0.7	0.88	1.85e-32	1	dynein_light_chain_LC6,_flagellar_outer_arm-like
LOC121431800	2.56e-36	-0.353403	0.496	0.756	4.52e-32	1	histone_H2A.V
LOC121411662	4.96e-36	-0.313562	0.589	0.829	8.75e-32	1	phosphate_carrier_protein,_mitochondrial-like
LOC121411742	5.59e-36	-0.303952	0.591	0.84	9.86e-32	1	ATP_synthase_subunit_gamma,_mitochondrial-like
LOC121430258	3.06e-35	-0.285831	0.683	0.872	5.39e-31	1	sodium/potassium-transporting_ATPase_subunit_beta-3-like
LOC121427769	3.46e-35	0.319499	0.995	0.997	6.11e-31	1	ATP-dependent_translocase_ABCB1-like
LOC121405922	5.86e-35	-0.252821	0.348	0.633	1.03e-30	1	NADH_dehydrogenase_[ubiquinone]_1_beta_subcomplex_subunit_2,_mitochondrial-like
LOC121431114	9.5e-35	-0.300328	0.231	0.445	1.68e-30	1	elongation_factor_1-alpha_2-like
LOC121432033	2.85e-34	-0.312691	0.541	0.79	5.02e-30	1	guanine_nucleotide-binding_protein_subunit_beta-2-like_1
LOC121406014	5.49e-33	-0.274276	0.679	0.895	9.69e-29	1	ATP_synthase_F(0)_complex_subunit_B1,_mitochondrial-like
LOC121424047	6.99e-33	-0.263872	0.75	0.909	1.23e-28	1	ATP_synthase_subunit_delta,_mitochondrial-like
LOC121428217	8.27e-33	-0.268936	0.374	0.652	1.46e-28	1	nucleolin-like
LOC121418862	1.87e-32	-0.349022	0.457	0.694	3.3e-28	1	heat_shock_protein_Hsp-16.48/Hsp-16.49-like
LOC121409239	2.01e-32	-0.28816	0.611	0.845	3.54e-28	1	14-3-3_family_protein_artA-like
LOC121428202	2.1e-32	-0.271634	0.591	0.829	3.71e-28	1	Y-box_factor_homolog
LOC121427376	2.41e-32	-0.261844	0.368	0.647	4.26e-28	1	enolase-like
LOC121415660	2.85e-32	-0.318507	0.535	0.79	5.03e-28	1	activated_RNA_polymerase_II_transcriptional_coactivator_p15-like
LOC121418813	4.25e-32	-0.277655	0.748	0.913	7.5e-28	1	galectin-8-like
LOC121423851	6.35e-31	0.260159	0.975	0.985	1.12e-26	1	uncharacterized_LOC121423851
LOC121413578	1.85e-30	1.41814	0.335	0.251	3.27e-26	1	uncharacterized_LOC121413578
LOC121418034	1.48e-28	-0.291822	0.351	0.591	2.61e-24	1	cellular_retinoic_acid-binding_protein_2-like
LOC121406199	6.63e-28	0.994272	0.412	0.379	1.17e-23	1	cryptochrome-1-like
LOC100134945	7.6e-28	-0.254569	0.421	0.678	1.34e-23	1	mortalin
LOC121415804	6.89e-27	-0.261104	0.544	0.799	1.22e-22	1	40S_ribosomal_protein_S6-like
LOC121424790	1.06e-26	1.05479	0.31	0.242	1.88e-22	1	uncharacterized_LOC121424790
LOC446192	1.08e-26	0.253112	0.974	0.982	1.91e-22	1	extracellular_matrix_protein_18
LOC121427391	6.5e-26	-0.264362	0.687	0.889	1.15e-21	1	gamma-aminobutyric_acid_receptor-associated_protein
LOC121429542	8.8e-26	0.901831	0.43	0.408	1.55e-21	1	muscleblind-like_protein_3
LOC121406173	4.8e-23	0.26244	0.817	0.84	8.48e-19	1	uncharacterized_LOC121406173
LOC121414288	1.42e-22	-0.288262	0.851	0.934	2.51e-18	1	tubulin_alpha-1A_chain-like
LOC121415190	4.27e-22	0.651044	0.554	0.581	7.53e-18	1	bcl-2-like_protein_2
LOC121428399	6.79e-20	-0.314173	0.3	0.462	1.2e-15	1	actin_CyI,_cytoplasmic
LOC121423799	4.33e-19	0.628805	0.549	0.573	7.65e-15	1	MAP_kinase-interacting_serine/threonine-protein_kinase_1-like
LOC121422288	8.81e-19	0.387416	0.719	0.782	1.56e-14	1	fatty_acid_synthase-like
LOC121411746	1.57e-17	0.893731	0.338	0.305	2.77e-13	1	sodium-_and_chloride-dependent_GABA_transporter_1-like
LOC121415035	4.32e-15	0.657362	0.471	0.501	7.63e-11	1	rho_guanine_nucleotide_exchange_factor_18-like
LOC121429605	4.38e-15	0.63991	0.488	0.514	7.73e-11	1	multidrug_resistance-associated_protein_5-like
LOC121418486	2.43e-13	0.845801	0.377	0.378	4.29e-09	1	RNA-binding_protein_Nova-1-like
LOC121422281	7.07e-13	0.596963	0.511	0.586	1.25e-08	1	ATP-dependent_RNA_helicase_dbp2-like
LOC121415947	8.06e-13	0.728699	0.412	0.416	1.42e-08	1	phosphatidate_phosphatase_LPIN3-like
LOC121427592	2.75e-11	0.284904	0.183	0.308	4.84e-07	1	translocation_protein_SEC62-like
LOC121410067	3.3e-10	0.807647	0.279	0.258	5.82e-06	1	ectopic_P_granules_protein_5_homolog
LOC121408307	9.54e-10	0.576983	0.5	0.568	1.68e-05	1	glutamic_acid-rich_protein-like
LOC121430638	6.58e-09	0.577902	0.413	0.431	0.000116037	1	monocarboxylate_transporter_2-like
LOC121431622	6.65e-09	0.895324	0.392	0.404	0.00011735	1	uncharacterized_LOC121431622
LOC121425891	1.43e-08	0.252005	0.198	0.314	0.000251929	1	kinesin_heavy_chain
LOC121431604	2.17e-08	0.447321	0.508	0.57	0.000382826	1	steroid_17-alpha-hydroxylase/17,20_lyase-like
LOC121417258	1.27e-07	0.254574	0.185	0.29	0.00223814	1	epidermal_growth_factor_receptor_kinase_substrate_8-like_protein_2
LOC121419440	4.28e-07	0.310989	0.192	0.298	0.00755779	1	bromodomain_adjacent_to_zinc_finger_domain_protein_1A-like
LOC121409315	6.84e-07	0.336946	0.177	0.273	0.0120619	1	BTB/POZ_domain-containing_adapter_for_CUL3-mediated_RhoA_degradation_protein_3-like
LOC121408196	7.01e-07	0.269648	0.206	0.316	0.0123752	1	serine/arginine_repetitive_matrix_protein_2-like
LOC121415663	1.03e-06	0.766581	0.267	0.26	0.0181839	1	apoptotic_chromatin_condensation_inducer_in_the_nucleus-like
LOC121415187	1.11e-06	0.756943	0.284	0.285	0.019545	1	histone-lysine_N-methyltransferase_ASH1L-like
LOC121419330	4.5e-06	0.254317	0.185	0.277	0.0793754	1	protein_sel-1_homolog_1-like
LOC121419157	4.94e-06	0.352307	0.619	0.729	0.0871643	1	cytochrome_P450_3A6-like
LOC121411553	5.21e-06	0.508331	0.429	0.485	0.0919115	1	uncharacterized_LOC121411553
LOC121410368	6.84e-06	0.255878	0.259	0.39	0.120713	1	talin-1-like
LOC121405994	7.46e-06	0.282116	0.187	0.277	0.131641	1	thymidine_phosphorylase-like
LOC121411576	1.46e-05	0.319116	0.235	0.349	0.258168	1	protein_DD3-3-like
LOC121429030	1.5e-05	0.335924	0.564	0.636	0.263865	1	immediate_early_response_gene_5-like_protein
LOC121425408	2.03e-05	0.250868	0.189	0.277	0.357453	1	myoferlin-like
LOC121431598	2.05e-05	0.289355	0.238	0.354	0.36119	1	coiled-coil_domain-containing_protein_6-like
LOC121424125	2.31e-05	0.384547	0.188	0.28	0.40671	1	protein_Wnt-6-like
LOC121424717	4.78e-05	0.358624	0.192	0.283	0.844159	1	uncharacterized_LOC121424717
LOC121418586	5.48e-05	0.282611	0.274	0.405	0.96641	1	protein_phosphatase_1B-like
LOC121418551	5.75e-05	0.502144	0.451	0.52	1	1	SPARC-related_modular_calcium-binding_protein_1-like
LOC121407947	8.09e-05	0.334377	0.195	0.286	1	1	terminal_nucleotidyltransferase_4A-like
LOC121418597	0.00025532	0.366352	0.234	0.339	1	1	transport_and_Golgi_organization_protein_1_homolog
LOC121414262	0.000391189	0.329826	0.215	0.304	1	1	uncharacterized_LOC121414262
LOC121415211	0.000496034	0.349132	0.177	0.252	1	1	RNA_polymerase_II_elongation_factor_ELL-like
LOC121422412	0.000649197	0.316392	0.245	0.351	1	1	WASH_complex_subunit_2-like
LOC121426068	0.000655316	0.420223	0.184	0.263	1	1	ATP-dependent_translocase_ABCB1-like
LOC121428321	0.000790976	0.296381	0.31	0.453	1	1	ATP-binding_cassette_sub-family_C_member_4-like
LOC121416581	0.000991016	0.281242	0.238	0.334	1	1	elongation_of_very_long_chain_fatty_acids_protein_6-like
LOC121423225	0.00104809	0.682985	0.304	0.337	1	1	putative_RNA-binding_protein_Luc7-like_2
LOC121407400	0.00109578	0.364025	0.222	0.316	1	1	apoptotic_chromatin_condensation_inducer_in_the_nucleus-like
LOC121406364	0.00172162	0.510856	0.364	0.411	1	1	uncharacterized_LOC121406364
LOC121429286	0.00181831	-0.261867	0.998	0.999	1	1	uncharacterized_LOC121429286
LOC121413767	0.00291015	0.341983	0.254	0.358	1	1	sterol_regulatory_element-binding_protein_1-like
LOC121418320	0.00292563	0.5016	0.197	0.277	1	1	putative_transcription_factor_p65_homolog
LOC121410833	0.00978136	0.678472	0.26	0.286	1	1	KAT8_regulatory_NSL_complex_subunit_1-like
LOC121423262	0.011364	0.648678	0.286	0.309	1	1	chromobox_protein_homolog_8-like
LOC121425739	0.0123174	0.578452	0.328	0.381	1	1	TBC1_domain_family_member_14-like
LOC121408910	0.0129964	0.382492	0.252	0.349	1	1	dentin_sialophosphoprotein-like
LOC121408658	0.0145759	0.394219	0.217	0.296	1	1	ubiquitin_carboxyl-terminal_hydrolase_32-like
LOC121423991	0.0151488	0.251009	0.33	0.454	1	1	next_to_BRCA1_gene_1_protein-like
LOC121427392	0.0163187	0.369613	0.293	0.409	1	1	tumor_protein_D52-like
LOC121415925	0.0169301	0.324906	0.272	0.368	1	1	uncharacterized_LOC121415925
LOC121412403	0.0188769	0.590596	0.328	0.384	1	1	extracellular_matrix_protein_3
LOC121408320	0.0214577	0.313492	0.305	0.414	1	1	NPC_intracellular_cholesterol_transporter_1-like
LOC121406090	0.0224962	0.37127	0.299	0.419	1	1	protein_phosphatase_1_regulatory_subunit_12B-like
LOC121407387	0.0241608	0.622615	0.284	0.316	1	1	uncharacterized_LOC121407387
LOC121418797	0.0255713	0.273346	0.536	0.653	1	1	heterogeneous_nuclear_ribonucleoprotein_U-like_protein_1
LOC121410148	0.0259153	0.366802	0.296	0.41	1	1	MAP_kinase-activated_protein_kinase_2-like
LOC121411459	0.0266436	0.423182	0.233	0.316	1	1	inactive_histone-lysine_N-methyltransferase_2E-like
LOC121415518	0.0572379	0.38148	0.236	0.311	1	1	casein_kinase_I-like
LOC121431291	0.0625647	0.420571	0.269	0.363	1	1	iroquois-class_homeodomain_protein_irx-3-like
LOC121422320	0.0677905	0.409172	0.239	0.317	1	1	hornerin-like
LOC121412919	0.0854165	0.449113	0.214	0.28	1	1	protein_Shroom2-like
LOC121419338	0.086332	0.587852	0.321	0.355	1	1	ADP-ribosylation_factor-like
LOC121415989	0.0963956	0.536981	0.305	0.355	1	1	transcription_factor_HIVEP3-like
LOC121410605	0.104879	0.331765	0.487	0.596	1	1	ras_association_domain-containing_protein_5-like
LOC121421314	0.107221	0.349387	0.303	0.404	1	1	fatty_acyl-CoA_reductase_1-like
LOC121407468	0.107745	0.408617	0.269	0.357	1	1	Golgi_apparatus_protein_1-like
LOC121422734	0.133085	0.507711	0.244	0.311	1	1	uncharacterized_LOC121422734
LOC121416219	0.141198	0.425634	0.235	0.306	1	1	proprotein_convertase_subtilisin/kexin_type_5-like
LOC121423143	0.155315	0.476949	0.273	0.353	1	1	fascin-like
LOC121427619	0.186704	0.388057	0.232	0.295	1	1	ATP-dependent_translocase_ABCB1-like
LOC121422780	0.204776	0.497094	0.351	0.439	1	1	myosin-11-like
LOC121425215	0.208997	0.41456	0.211	0.265	1	1	myosin_light_chain_kinase,_smooth_muscle-like
LOC121428570	0.216844	0.559462	0.323	0.4	1	1	spliceosome_RNA_helicase_Ddx39b
LOC121411767	0.225588	0.471434	0.313	0.377	1	1	uncharacterized_LOC121411767
LOC121406318	0.233342	0.439765	0.263	0.331	1	1	trichohyalin-like
LOC121426430	0.247351	0.497909	0.238	0.308	1	1	trichohyalin-like
LOC121411918	0.273192	0.653207	0.272	0.326	1	1	protein_diaphanous_homolog_2-like
LOC121415114	0.279254	0.364476	0.224	0.276	1	1	uncharacterized_LOC121415114
LOC121411747	0.28095	0.511316	0.32	0.389	1	1	sodium-_and_chloride-dependent_GABA_transporter_2-like
LOC121430031	0.282874	0.457363	0.203	0.254	1	1	arginine_and_glutamate-rich_protein_1-like
LOC121426747	0.300734	0.533168	0.212	0.27	1	1	uncharacterized_LOC121426747
LOC121424891	0.324186	0.4605	0.254	0.331	1	1	uncharacterized_LOC121424891
LOC121405875	0.345537	0.592062	0.238	0.272	1	1	F-actin-monooxygenase_MICAL3-like
LOC121428833	0.418777	0.263191	0.27	0.302	1	1	heat_shock_70_kDa_protein_IV
LOC121410498	0.430893	0.48753	0.275	0.354	1	1	transcription_factor_E3-like
LOC121427237	0.480773	0.497849	0.227	0.285	1	1	uncharacterized_LOC121427237
LOC121409148	0.502254	0.578277	0.219	0.254	1	1	dentin_matrix_acidic_phosphoprotein_1-like
LOC121415224	0.519923	0.346117	0.368	0.484	1	1	non-lysosomal_glucosylceramidase-like
LOC121428459	0.542238	0.599252	0.491	0.639	1	1	endoplasmic_reticulum_chaperone_BiP-like
LOC121415564	0.55307	0.476573	0.226	0.28	1	1	chromodomain-helicase-DNA-binding_protein_2-like
LOC121410256	0.580665	0.415434	0.334	0.396	1	1	rho-related_protein_racA-like
LOC121415315	0.633944	0.458869	0.314	0.383	1	1	cyclic_AMP-responsive_element-binding_protein_3-like_protein_4
LOC121411954	0.722721	0.555411	0.232	0.276	1	1	FYVE,_RhoGEF_and_PH_domain-containing_protein_6-like
LOC121425031	0.768772	0.502151	0.287	0.356	1	1	probable_JmjC_domain-containing_histone_demethylation_protein_2C
LOC121419174	0.789963	0.574259	0.231	0.278	1	1	RNA-binding_protein_25-like
LOC121420333	0.833576	0.480404	0.283	0.354	1	1	uncharacterized_LOC121420333
LOC121408832	0.90685	0.51941	0.253	0.312	1	1	rho_GTPase-activating_protein_26-like
LOC121429715	0.909292	0.522083	0.22	0.265	1	1	multidrug_resistance-associated_protein_5-like
LOC121423785	0	1.00279	0.636	0.126	0	2	Krueppel-like_factor_6
LOC121424994	0	0.719251	1	1	0	2	uncharacterized_LOC121424994
LOC121428399	0	1.50605	0.872	0.321	0	2	actin_CyI,_cytoplasmic
LOC121430760	0	1.57179	0.891	0.328	0	2	actin_CyI,_cytoplasmic-like
gene-DR311-mgr02	0	-1.15002	1	1	0	2
gene-DR311-mgr01	0	-1.32673	1	1	0	2
LOC121419033	1.89e-304	0.762906	0.515	0.082	3.34e-300	2	cofilin/actin-depolymerizing_factor_homolog
LOC121427485	1.43e-284	0.886676	0.724	0.198	2.53e-280	2	uncharacterized_protein_C1orf50_homolog
LOC121424436	7.45e-272	1.08836	0.601	0.137	1.32e-267	2	sodium-_and_chloride-dependent_glycine_transporter_1-like
LOC121426401	1.26e-269	0.865928	0.615	0.143	2.22e-265	2	rho_GTPase-activating_protein_27-like
LOC121415060	5.01e-254	0.931012	0.664	0.178	8.84e-250	2	uncharacterized_LOC121415060
LOC121410256	1.04e-243	0.96964	0.82	0.281	1.84e-239	2	rho-related_protein_racA-like
LOC121423143	8.14e-237	0.891427	0.745	0.24	1.44e-232	2	fascin-like
LOC121408055	2.69e-235	0.773761	0.69	0.197	4.75e-231	2	core-binding_factor_subunit_beta-like
LOC121431622	5.79e-224	0.815469	0.831	0.304	1.02e-219	2	uncharacterized_LOC121431622
LOC121423022	6.25e-223	0.959995	0.788	0.287	1.1e-218	2	mitogen-activated_protein_kinase_kinase_kinase_13-like
LOC121431064	1.79e-221	0.600788	0.456	0.09	3.16e-217	2	F-box_only_protein_32-like
LOC121428519	1.02e-218	0.857749	0.866	0.329	1.79e-214	2	actin-15B
LOC121426187	9.2e-213	1.02671	0.873	0.372	1.62e-208	2	uncharacterized_LOC121426187
LOC121420109	1.18e-210	0.458632	1	1	2.09e-206	2	60S_acidic_ribosomal_protein_P1-like
LOC121429836	1.24e-207	0.530661	0.324	0.045	2.19e-203	2	B-cell_CLL/lymphoma_6_member_B_protein-like
LOC121418654	1.91e-207	0.578464	0.51	0.119	3.38e-203	2	serum_response_factor-like
LOC121415203	3.57e-204	0.804479	0.888	0.39	6.31e-200	2	E3_ubiquitin-protein_ligase_arih1-like
LOC121406318	2.59e-201	0.735148	0.701	0.227	4.56e-197	2	trichohyalin-like
LOC121418941	9.35e-200	0.49122	0.362	0.061	1.65e-195	2	probable_E3_ubiquitin-protein_ligase_IRF2BPL
LOC121431756	1.91e-198	0.947688	0.354	0.061	3.37e-194	2	probable_rhodanese_domain-containing_dual_specificity_protein_phosphatase
LOC121415315	3.32e-193	0.700989	0.774	0.274	5.85e-189	2	cyclic_AMP-responsive_element-binding_protein_3-like_protein_4
LOC121423744	2.49e-192	0.686353	0.61	0.18	4.4e-188	2	Krueppel-like_factor_5
LOC121418780	1.58e-190	0.631168	0.383	0.074	2.8e-186	2	glutathione-specific_gamma-glutamylcyclotransferase_1-like
LOC121412046	1.41e-189	0.677399	0.754	0.269	2.48e-185	2	uncharacterized_LOC121412046
LOC121426068	5.29e-189	0.540944	0.585	0.166	9.33e-185	2	ATP-dependent_translocase_ABCB1-like
LOC121410666	1.34e-186	0.880468	0.961	0.592	2.37e-182	2	protein_BTG1-like
LOC121409315	2.52e-186	0.552953	0.591	0.172	4.45e-182	2	BTB/POZ_domain-containing_adapter_for_CUL3-mediated_RhoA_degradation_protein_3-like
LOC121423262	9.35e-185	0.609777	0.676	0.218	1.65e-180	2	chromobox_protein_homolog_8-like
LOC121431033	3.59e-182	0.431094	0.292	0.042	6.33e-178	2	F-box_only_protein_32-like
LOC121414301	1.45e-177	0.608323	0.634	0.203	2.56e-173	2	uncharacterized_LOC121414301
LOC121415639	1.28e-176	0.690796	0.541	0.153	2.26e-172	2	glutamate_receptor_1-like
LOC121423374	1.28e-173	0.531434	1	0.997	2.26e-169	2	40S_ribosomal_protein_S2
LOC121406364	2.94e-173	0.644098	0.809	0.307	5.2e-169	2	uncharacterized_LOC121406364
LOC121413528	7.39e-173	0.647399	0.472	0.126	1.3e-168	2	tyrosine--tRNA_ligase,_cytoplasmic-like
LOC121424951	1.13e-172	0.468388	0.562	0.159	1.99e-168	2	uncharacterized_LOC121424951
LOC121417134	8e-167	0.438995	0.43	0.104	1.41e-162	2	rab11_family-interacting_protein_2-like
LOC121407406	7.2e-163	0.476566	0.298	0.051	1.27e-158	2	papilin-like
LOC121410002	1.25e-158	0.432418	0.493	0.139	2.21e-154	2	dual_specificity_tyrosine-phosphorylation-regulated_kinase_2-like
LOC121422018	6.02e-157	0.418162	1	0.993	1.06e-152	2	60S_acidic_ribosomal_protein_P0-like
LOC121413614	1.03e-156	0.413091	0.379	0.086	1.82e-152	2	serine/threonine-protein_kinase_LATS2-like
LOC121415634	9.66e-153	0.755822	0.57	0.19	1.7e-148	2	glutamate_receptor_3-like
LOC121412919	1.14e-147	0.4585	0.586	0.191	2.02e-143	2	protein_Shroom2-like
LOC121413935	3.73e-146	0.391453	0.353	0.081	6.58e-142	2	wiskott-Aldrich_syndrome_protein_family_member_3-like
LOC121427506	4.11e-145	0.340958	0.26	0.042	7.26e-141	2	SPRY_domain-containing_SOCS_box_protein_4-like
LOC121407346	1.19e-142	0.403496	0.36	0.086	2.1e-138	2	PRELI_domain_containing_protein_3B-like
LOC121405827	1.52e-142	0.808034	0.735	0.322	2.68e-138	2	G1/S-specific_cyclin-D1-like
LOC121430677	8.18e-139	0.488416	0.473	0.143	1.44e-134	2	myc_protein-like
LOC121406261	3.81e-135	0.395003	0.352	0.085	6.73e-131	2	uncharacterized_LOC121406261
LOC121424216	7.63e-135	0.428879	0.476	0.146	1.35e-130	2	growth_arrest_and_DNA_damage-inducible_protein_GADD45_gamma-like
LOC121419271	9.17e-135	0.443143	0.577	0.202	1.62e-130	2	cell_division_control_protein_42_homolog
LOC121411918	3.49e-133	0.40157	0.645	0.238	6.16e-129	2	protein_diaphanous_homolog_2-like
LOC121428227	1.5e-132	0.362938	1	1	2.65e-128	2	60S_ribosomal_protein_L11
LOC121428601	1.98e-132	0.477795	0.696	0.27	3.5e-128	2	serine/threonine_kinase-like_domain-containing_protein_STKLD1
LOC121414351	1.51e-131	0.493001	0.619	0.23	2.67e-127	2	leucine--tRNA_ligase,_cytoplasmic-like
LOC121409246	5.39e-131	0.442101	0.574	0.2	9.52e-127	2	transcription_intermediary_factor_1-alpha-like
LOC121414430	6.05e-130	0.27893	0.302	0.064	1.07e-125	2	uncharacterized_LOC121414430
LOC121420380	2.42e-129	0.626245	0.881	0.438	4.28e-125	2	protein_BTG3-like
LOC121425027	4.42e-129	0.399023	0.517	0.17	7.8e-125	2	F-box/LRR-repeat_protein_2-like
LOC121426430	2.34e-128	0.386887	0.607	0.22	4.14e-124	2	trichohyalin-like
LOC121411576	2.47e-128	0.411138	0.653	0.246	4.36e-124	2	protein_DD3-3-like
LOC121420133	3.29e-128	0.372817	1	0.999	5.8e-124	2	40S_ribosomal_protein_S19-like
LOC121410526	1.2e-127	0.382658	0.518	0.173	2.12e-123	2	protein_kinase_C_delta_type-like
LOC121411201	4.64e-127	0.375791	0.412	0.119	8.18e-123	2	rho-related_GTP-binding_protein_RhoA-B-like
LOC121405795	1.79e-124	0.640782	0.945	0.559	3.15e-120	2	transmembrane_protein_258
LOC121408340	9.41e-122	0.644212	0.958	0.655	1.66e-117	2	CCAAT/enhancer-binding_protein_alpha-like
LOC121425657	4.47e-121	0.292995	0.4	0.114	7.9e-117	2	tyrosine-protein_phosphatase_non-receptor_type_23-like
LOC121419032	4.71e-121	0.51602	1	0.926	8.32e-117	2	cofilin-like
LOC121410255	7.19e-121	0.325334	0.395	0.114	1.27e-116	2	succinate_dehydrogenase_assembly_factor_3,_mitochondrial-like
LOC121405836	1.15e-119	0.343674	0.355	0.094	2.03e-115	2	uncharacterized_LOC121405836
LOC121415197	1.81e-119	0.438222	0.64	0.253	3.2e-115	2	coatomer_subunit_epsilon-like
LOC121421553	4.97e-119	0.548095	1	1	8.77e-115	2	soma_ferritin-like
LOC121423647	5.4e-119	0.601848	0.797	0.372	9.53e-115	2	transcription_factor_AP-1-like
LOC121411494	8.76e-119	0.504727	0.799	0.363	1.55e-114	2	AN1-type_zinc_finger_protein_5-like
LOC121415334	4.81e-118	0.63501	0.95	0.575	8.49e-114	2	uncharacterized_LOC121415334
LOC121410399	9.16e-117	0.447045	0.469	0.159	1.62e-112	2	uncharacterized_LOC121410399
LOC121411302	1.98e-116	0.372522	1	0.998	3.49e-112	2	ATP_synthase_F(0)_complex_subunit_C1,_mitochondrial-like
LOC121422537	3.42e-116	0.347806	0.485	0.165	6.03e-112	2	E3_ubiquitin-protein_ligase_ZNF598-like
LOC121406033	6.38e-114	0.318069	1	0.999	1.13e-109	2	60S_ribosomal_protein_L44-like
LOC121431598	1.13e-113	0.370375	0.642	0.255	1.99e-109	2	coiled-coil_domain-containing_protein_6-like
LOC121410589	8.64e-113	0.264215	0.308	0.076	1.53e-108	2	ETS_domain-containing_protein_Elk-3-like
LOC121415989	2.08e-112	0.396646	0.663	0.27	3.66e-108	2	transcription_factor_HIVEP3-like
LOC121423694	2.9e-112	0.418145	0.564	0.216	5.13e-108	2	transcription_factor_BTF3_homolog_4-like
LOC121409191	6.04e-112	0.585825	0.954	0.582	1.07e-107	2	flotillin-2a-like
LOC121413873	1.16e-111	0.273999	0.282	0.065	2.04e-107	2	ecdysone-induced_protein_74EF-like
LOC121405875	7.19e-111	0.367962	0.541	0.2	1.27e-106	2	F-actin-monooxygenase_MICAL3-like
LOC121410003	7.45e-111	0.581099	0.701	0.311	1.31e-106	2	glutamine--tRNA_ligase-like
LOC121424487	1.82e-110	0.26469	0.471	0.159	3.21e-106	2
LOC121418929	1.61e-109	0.333041	0.558	0.205	2.84e-105	2	circularly_permutated_Ras_protein_1-like
LOC121426747	1.9e-109	0.266742	0.535	0.193	3.35e-105	2	uncharacterized_LOC121426747
LOC121426043	7.38e-109	0.265362	0.328	0.088	1.3e-104	2	SRC_kinase_signaling_inhibitor_1-like
LOC121426447	1.04e-108	0.265443	0.347	0.097	1.84e-104	2	ankyrin_repeat_and_zinc_finger_domain-containing_protein_1-like
LOC121406953	1.66e-108	0.615283	0.971	0.678	2.93e-104	2
LOC121422304	3.41e-108	0.265611	0.468	0.158	6.01e-104	2	rab11_family-interacting_protein_3-like
LOC121428469	3.77e-108	0.329506	0.478	0.165	6.65e-104	2	uncharacterized_LOC121428469
LOC121424744	1.12e-107	0.295359	0.261	0.059	1.97e-103	2	ikaros_family_zinc_finger_protein-like
LOC121411899	1.12e-107	0.42576	0.527	0.196	1.98e-103	2	ankyrin_repeat_domain-containing_protein_27-like
LOC121426229	7.61e-107	0.262769	0.579	0.222	1.34e-102	2	zinc_finger_protein_622-like
LOC121412574	1.26e-106	0.31271	0.44	0.147	2.23e-102	2	proteolipid_protein_DM_beta-like
LOC121411243	5.74e-106	0.356104	0.645	0.264	1.01e-101	2	programmed_cell_death_6-interacting_protein-like
LOC121427349	1.6e-105	0.578987	0.959	0.649	2.83e-101	2	cholinesterase_1-like
LOC121423648	9.54e-105	0.29708	0.384	0.119	1.68e-100	2	PHD_finger_protein_24-like
LOC121414262	2.58e-103	0.425833	0.56	0.219	4.55e-99	2	uncharacterized_LOC121414262
LOC121431291	4.37e-103	0.335071	0.652	0.27	7.71e-99	2	iroquois-class_homeodomain_protein_irx-3-like
LOC121431021	4.65e-103	0.347704	1	1	8.21e-99	2	40S_ribosomal_protein_S12-like
LOC121415038	6.58e-103	0.394791	0.55	0.215	1.16e-98	2	mitochondrial_import_inner_membrane_translocase_subunit_TIM44-like
LOC121424352	6.8e-103	0.26447	0.305	0.081	1.2e-98	2	uncharacterized_LOC121424352
LOC121409673	5.45e-102	0.326675	0.522	0.196	9.62e-98	2	kinesin-like_protein_KIF28P
LOC121418955	6.58e-102	0.463954	0.994	0.866	1.16e-97	2	uncharacterized_LOC121418955
LOC121405677	1.97e-101	0.314026	0.503	0.186	3.48e-97	2	SH3_and_multiple_ankyrin_repeat_domains_protein_3-like
LOC121426592	3.84e-101	0.267494	0.395	0.127	6.78e-97	2	cAMP-responsive_element_modulator-like
LOC121428363	4.49e-101	0.387324	0.619	0.255	7.92e-97	2	valine--tRNA_ligase-like
LOC121428205	1.77e-99	0.265317	0.414	0.138	3.12e-95	2	E3_ubiquitin-protein_ligase_RNF19A-like
LOC121408550	1.88e-99	0.575684	0.893	0.474	3.31e-95	2	GTP-binding_nuclear_protein_Ran-like
LOC121422929	7.64e-99	0.303631	0.489	0.179	1.35e-94	2	formin-like_protein_18
LOC121414150	2.23e-98	0.291065	0.617	0.25	3.94e-94	2	eukaryotic_translation_initiation_factor_1A,_Y-chromosomal-like
LOC121416531	6.89e-98	0.275242	0.52	0.199	1.22e-93	2	calcium-binding_protein_P-like
LOC121409069	1.55e-97	0.290276	0.614	0.253	2.73e-93	2	SREBP_regulating_gene_protein-like
LOC121411406	6.3e-97	0.277561	0.562	0.22	1.11e-92	2	scaffold_attachment_factor_B2-like
LOC121429487	6.59e-97	0.353383	0.317	0.092	1.16e-92	2	parkin_coregulated_gene_protein_homolog
LOC121415546	1.88e-96	0.562641	0.729	0.353	3.31e-92	2	asparagine--tRNA_ligase,_cytoplasmic-like
LOC121408474	4.11e-96	0.35128	0.672	0.291	7.24e-92	2	RNA-binding_protein_Musashi_homolog_2-like
LOC121415785	4.81e-96	0.443928	0.758	0.355	8.49e-92	2	polyubiquitin-C
LOC121415352	7.84e-96	0.322991	1	1	1.38e-91	2	40S_ribosomal_protein_S17-like
LOC121416285	1e-95	0.306448	0.565	0.225	1.77e-91	2	threonine--tRNA_ligase_1,_cytoplasmic-like
LOC121422974	1.11e-95	0.372814	0.778	0.356	1.96e-91	2	eukaryotic_peptide_chain_release_factor_GTP-binding_subunit_ERF3A-like
LOC121422686	1.74e-95	0.253968	0.513	0.194	3.06e-91	2	E3_ubiquitin-protein_ligase_CHIP-like
LOC121418776	6.36e-95	0.511789	0.913	0.506	1.12e-90	2	peptidyl-prolyl_cis-trans_isomerase_FKBP2-like
LOC121419906	7.45e-95	0.459263	0.989	0.815	1.32e-90	2	ATP_synthase_subunit_g,_mitochondrial-like
LOC121411346	8.87e-95	0.54649	0.782	0.395	1.57e-90	2	uncharacterized_LOC121411346
LOC121425180	1.23e-94	0.251115	0.356	0.112	2.17e-90	2	mitochondrial_proton/calcium_exchanger_protein-like
LOC121420304	1.28e-94	0.27555	0.303	0.086	2.26e-90	2	cilia-_and_flagella-associated_protein_45-like
LOC121423991	3.19e-94	0.389709	0.758	0.348	5.64e-90	2	next_to_BRCA1_gene_1_protein-like
LOC121407861	5.59e-94	0.270987	0.409	0.141	9.87e-90	2	protein_FAM114A2-like
LOC121429708	1.54e-93	0.258248	0.56	0.222	2.71e-89	2	importin_subunit_alpha-3-like
LOC121411067	3.18e-93	0.336015	0.656	0.286	5.6e-89	2	basic_leucine_zipper_and_W2_domain-containing_protein_1-like
LOC121407007	3.91e-93	0.304594	0.645	0.277	6.9e-89	2	NADH_dehydrogenase_[ubiquinone]_flavoprotein_2,_mitochondrial-like
LOC121421110	7.37e-93	0.274594	1	1	1.3e-88	2	60S_ribosomal_protein_L27a-like
LOC121405864	1.23e-92	0.268325	0.424	0.15	2.16e-88	2	T-complex_protein_1_subunit_beta-like
LOC121411556	4.14e-92	0.367651	0.712	0.323	7.3e-88	2	thyrotroph_embryonic_factor-like
LOC121411086	8.98e-92	0.313364	0.389	0.131	1.58e-87	2	dnaJ_homolog_subfamily_B_member_9-like
LOC121424051	1.36e-91	0.309082	0.569	0.233	2.4e-87	2	plasminogen_activator_inhibitor_1_RNA-binding_protein-like
LOC121429247	2.22e-91	0.255767	0.412	0.144	3.91e-87	2	protein_PRRC2C-like
LOC121419283	3.19e-91	0.252376	0.37	0.122	5.62e-87	2	atypical_kinase_COQ8B,_mitochondrial-like
LOC121405738	4.53e-91	0.358252	0.758	0.352	8e-87	2	staphylococcal_nuclease_domain-containing_protein_1-like
LOC121416858	1.51e-90	0.266898	0.357	0.117	2.66e-86	2	transcription_elongation_factor_SPT5-like
LOC121405722	2.8e-90	0.339989	0.722	0.327	4.93e-86	2	src_substrate_cortactin-like
LOC121413730	4.96e-90	0.277936	0.442	0.163	8.75e-86	2	moesin-like
LOC121417059	7.12e-90	0.259859	0.421	0.152	1.26e-85	2	splicing_factor_3A_subunit_1-like
LOC121427221	1.04e-89	0.252199	0.305	0.09	1.83e-85	2	serine/arginine_repetitive_matrix_protein_1-like
LOC121420405	3.21e-89	0.389681	0.808	0.397	5.67e-85	2	ATP-dependent_RNA_helicase_cgh-1-like
LOC121426373	5.92e-89	0.298337	0.357	0.12	1.05e-84	2	NADH_dehydrogenase_[ubiquinone]_1_alpha_subcomplex_subunit_10,_mitochondrial-like
LOC121428378	2.43e-88	0.291911	1	0.996	4.29e-84	2	60S_ribosomal_protein_L35-like
LOC121409284	2.03e-87	0.294336	0.313	0.095	3.58e-83	2	myb-like_protein_X
LOC121411428	1.87e-86	0.338401	1	0.972	3.3e-82	2	nucleoside_diphosphate_kinase_A_2-like
LOC121428983	2.04e-86	0.593368	0.369	0.128	3.61e-82	2	uncharacterized_LOC121428983
LOC121431023	1.17e-84	0.291215	1	0.999	2.06e-80	2	40S_ribosomal_protein_S20-like
LOC121420440	1.2e-84	0.594393	0.742	0.387	2.11e-80	2	cytochrome_P450_3A8-like
LOC121408801	5.09e-84	0.272976	1	1	8.98e-80	2	60S_acidic_ribosomal_protein_P2-like
LOC121422407	3.44e-83	-0.803554	0.909	0.883	6.08e-79	2	histone_H1-delta-like
LOC121410216	1.14e-82	0.367405	0.803	0.397	2e-78	2	twinfilin-1-like
LOC121430557	5.35e-82	0.378309	0.673	0.318	9.43e-78	2	nucleolin_1-like
LOC121431730	6.08e-82	0.280766	0.594	0.257	1.07e-77	2	outer_mitochondrial_transmembrane_helix_translocase-like
LOC121418926	1.4e-81	0.368803	0.998	0.935	2.47e-77	2	uncharacterized_LOC121418926
LOC121413087	1.66e-81	0.324487	1	0.991	2.93e-77	2	elongation_factor_1-alpha
LOC121406997	1.73e-81	0.266197	0.641	0.284	3.05e-77	2	dnaJ_homolog_subfamily_A_member_2-like
LOC121408794	4.6e-81	0.300199	0.507	0.208	8.11e-77	2	clustered_mitochondria_protein_homolog
LOC121426805	6.98e-81	0.272989	0.612	0.268	1.23e-76	2	MICOS_complex_subunit_MIC27-like
LOC121418633	2.05e-79	0.284411	0.38	0.14	3.61e-75	2	neutral_and_basic_amino_acid_transport_protein_rBAT-like
LOC121411551	2.62e-79	0.302407	1	0.996	4.62e-75	2	40S_ribosomal_protein_S27-like
LOC121411826	1.32e-78	0.346703	0.736	0.353	2.33e-74	2	mitochondrial_import_inner_membrane_translocase_subunit_Tim16-like
LOC121408325	1.33e-78	0.421142	0.906	0.516	2.35e-74	2	charged_multivesicular_body_protein_4b-like
LOC121407985	2.93e-78	0.250576	0.605	0.271	5.17e-74	2	vacuolar_protein_sorting-associated_protein_4B-like
LOC121418368	1.09e-77	0.265979	0.555	0.241	1.92e-73	2	cilia-_and_flagella-associated_protein_36-like
LOC121407316	1.37e-77	0.295178	0.682	0.317	2.41e-73	2	calnexin-like
LOC121415659	5.81e-77	0.344032	0.761	0.37	1.02e-72	2	uncharacterized_LOC121415659
LOC121419389	7.96e-77	0.480209	0.901	0.528	1.4e-72	2	mRNA_decay_activator_protein_ZFP36L2-A-like
LOC121422997	8.27e-77	0.266472	0.458	0.182	1.46e-72	2	uncharacterized_LOC121422997
LOC121428518	9.64e-77	0.434034	0.769	0.397	1.7e-72	2	far_upstream_element-binding_protein_1-like
LOC121411505	1.15e-76	0.34817	0.831	0.424	2.02e-72	2	ras-related_protein_Rab-8A-like
LOC121431688	1.42e-76	0.332218	0.611	0.284	2.51e-72	2	adenosine_kinase-like
LOC121405946	3.69e-76	0.40004	0.689	0.335	6.51e-72	2	tyrosine_3-monooxygenase-like
LOC121411215	7.28e-76	0.252192	0.445	0.177	1.28e-71	2	protein_mono-ADP-ribosyltransferase_PARP3-like
LOC121407069	8.27e-76	-0.348425	1	1	1.46e-71	2	fibropellin-3-like
LOC121411122	3.71e-74	0.324469	0.69	0.329	6.55e-70	2	heat_shock_cognate_71_kDa_protein-like
LOC121425624	1.54e-73	0.347268	0.997	0.93	2.72e-69	2	uncharacterized_LOC121425624
LOC121413372	3.46e-73	0.670724	0.467	0.209	6.11e-69	2	uncharacterized_LOC121413372
LOC121430679	9.53e-73	0.350589	0.616	0.291	1.68e-68	2	eukaryotic_translation_initiation_factor_2_subunit_1-like
LOC121429030	1.13e-72	0.383522	0.899	0.555	1.99e-68	2	immediate_early_response_gene_5-like_protein
LOC121417095	1.38e-72	0.367818	0.747	0.376	2.43e-68	2	APOBEC1_complementation_factor-like
LOC121415894	6.04e-72	0.409369	0.799	0.429	1.06e-67	2	polyubiquitin-C-like
LOC121407666	7.22e-72	0.428428	0.917	0.54	1.27e-67	2	caveolin-1-like
LOC121423799	1.15e-71	0.411046	0.853	0.503	2.03e-67	2	MAP_kinase-interacting_serine/threonine-protein_kinase_1-like
LOC121422285	6.64e-70	0.312652	0.706	0.346	1.17e-65	2	uncharacterized_LOC121422285
LOC121418762	1.2e-69	0.408283	0.849	0.505	2.11e-65	2	fos-related_antigen_1-like
LOC121416034	1.56e-69	0.321448	1	0.98	2.75e-65	2	40S_ribosomal_protein_S15-like
LOC121427437	2.51e-69	0.319811	0.661	0.323	4.42e-65	2	ATPase_family_AAA_domain-containing_protein_3-B-like
LOC121418990	4.84e-68	0.396647	0.877	0.49	8.54e-64	2	polyadenylate-binding_protein_4-like
LOC121410170	5.44e-68	0.261586	0.65	0.31	9.61e-64	2	transmembrane_emp24_domain-containing_protein_3-like
LOC121414288	2e-67	0.404649	0.996	0.895	3.54e-63	2	tubulin_alpha-1A_chain-like
LOC121419182	2.97e-65	0.25058	0.371	0.146	5.24e-61	2	bifunctional_glutamate/proline--tRNA_ligase-like
LOC121415221	1.31e-64	0.257197	0.696	0.349	2.31e-60	2	eukaryotic_translation_initiation_factor_3_subunit_J-like
LOC121417536	1.48e-64	0.330651	0.996	0.905	2.61e-60	2	60S_ribosomal_protein_L15-like
LOC121414272	8.35e-64	0.340179	0.739	0.385	1.47e-59	2	eukaryotic_translation_initiation_factor_2_subunit_3
LOC121411431	1.15e-63	0.284836	0.775	0.398	2.03e-59	2	ADP-ribosylation_factor_4-like
LOC121411555	2.45e-63	0.356307	0.993	0.85	4.33e-59	2	uncharacterized_LOC121411555
LOC121417224	3.1e-63	0.363989	0.87	0.487	5.47e-59	2	pumilio_homolog_2-like
LOC121411553	1.66e-62	0.257317	0.774	0.403	2.93e-58	2	uncharacterized_LOC121411553
LOC121416183	1.95e-62	0.360984	0.992	0.89	3.43e-58	2	14-3-3-like_protein_2
LOC121408797	8.84e-62	0.281468	0.835	0.446	1.56e-57	2	eukaryotic_translation_initiation_factor_3_subunit_C-like
LOC121428872	1.01e-61	0.259966	1	0.999	1.79e-57	2	60S_ribosomal_protein_L28-like
LOC121407456	4.42e-61	0.385496	0.912	0.537	7.81e-57	2	cytochrome_b-c1_complex_subunit_Rieske,_mitochondrial-like
LOC121431687	8.12e-61	0.303653	1	0.979	1.43e-56	2	voltage-dependent_anion-selective_channel_protein_2-like
LOC121426908	1.25e-60	0.382243	0.971	0.698	2.2e-56	2	insulin-like_growth_factor_2_mRNA-binding_protein_3
LOC121417109	1.83e-60	0.286945	0.655	0.331	3.23e-56	2	APOBEC1_complementation_factor-like
LOC121416573	2.31e-60	0.293731	0.844	0.448	4.08e-56	2	uncharacterized_LOC121416573
LOC121425394	5.76e-60	0.359378	0.985	0.814	1.02e-55	2	uncharacterized_LOC121425394
LOC121415061	7.08e-60	0.255855	0.786	0.41	1.25e-55	2	small_ubiquitin-related_modifier_3-like
LOC121420210	8.98e-60	0.385827	0.979	0.76	1.58e-55	2	ATP_synthase-coupling_factor_6,_mitochondrial-like
LOC121417553	2.56e-59	0.317371	0.996	0.911	4.51e-55	2	60S_ribosomal_protein_L15-like
LOC121428312	5.64e-59	0.294829	1	0.999	9.95e-55	2	actin,_cytoskeletal_1A
LOC121430715	1.34e-58	0.292972	0.844	0.463	2.36e-54	2	peptidyl-prolyl_cis-trans_isomerase_FKBP1B-like
LOC121423109	3.55e-58	0.288043	0.803	0.426	6.26e-54	2	NADH_dehydrogenase_[ubiquinone]_1_beta_subcomplex_subunit_10-like
LOC121431277	1.53e-57	0.327891	0.996	0.894	2.69e-53	2	cytochrome_b-c1_complex_subunit_8-like
LOC121415947	1.91e-56	0.274914	0.672	0.357	3.37e-52	2	phosphatidate_phosphatase_LPIN3-like
LOC121418700	6.41e-56	0.382027	0.94	0.637	1.13e-51	2	elongation_factor_1-gamma-like
LOC121431114	2.77e-55	0.418046	0.633	0.34	4.89e-51	2	elongation_factor_1-alpha_2-like
LOC121422462	1.1e-54	0.394359	0.92	0.577	1.94e-50	2	prohibitin-like
LOC121428652	2.19e-54	0.27417	0.822	0.453	3.87e-50	2	flotillin-1-like
LOC121428698	2.77e-54	0.368567	0.964	0.695	4.89e-50	2	60S_ribosomal_protein_L7a-like
LOC121421476	3.15e-54	0.258239	0.765	0.404	5.56e-50	2	magnetosome-associated_protein_MamJ-like
LOC121430841	5.26e-54	0.29097	1	0.965	9.28e-50	2	40S_ribosomal_protein_S21-like
LOC121426629	4.42e-52	0.257896	0.655	0.344	7.81e-48	2	hydroxyacid_oxidase_1-like
LOC121410517	7.18e-52	0.313033	0.883	0.519	1.27e-47	2	ras-related_protein_Rab-7a-like
LOC121430846	8.68e-52	0.337517	0.985	0.793	1.53e-47	2	cytochrome_c_oxidase_subunit_5B,_mitochondrial-like
LOC121407996	2.97e-51	0.44866	0.969	0.767	5.23e-47	2	eukaryotic_translation_initiation_factor_2_subunit_2-like
LOC121421007	4.58e-51	0.327533	0.984	0.82	8.08e-47	2	ATPase_inhibitor_A,_mitochondrial-like
LOC121418862	5.7e-50	0.401102	0.878	0.583	1.01e-45	2	heat_shock_protein_Hsp-16.48/Hsp-16.49-like
LOC121422637	7.69e-50	0.326291	0.993	0.907	1.36e-45	2	40S_ribosomal_protein_SA
LOC121410605	5.54e-49	0.272048	0.857	0.505	9.78e-45	2	ras_association_domain-containing_protein_5-like
LOC121428158	7.3e-48	0.338109	0.925	0.605	1.29e-43	2	cytochrome_b-c1_complex_subunit_7-like
LOC121405802	1.89e-47	0.266312	0.858	0.489	3.33e-43	2	transaldolase-like
LOC121406173	2.03e-47	-0.548338	0.853	0.83	3.58e-43	2	uncharacterized_LOC121406173
LOC121410604	2.24e-47	0.306542	0.781	0.449	3.96e-43	2	serine--tRNA_ligase,_cytoplasmic-like
LOC121431052	1.4e-46	-0.292999	0.998	0.994	2.48e-42	2	annexin_A13-like
LOC446166	1.59e-46	0.295292	0.779	0.457	2.81e-42	2	embryonic_blastocoelar_extracellular_matrix_protein_precursor
LOC121409301	4.82e-46	0.26375	0.997	0.917	8.5e-42	2	cytochrome_c_oxidase_subunit_6A,_mitochondrial-like
LOC121416918	1.73e-45	0.281014	0.996	0.857	3.06e-41	2	60S_ribosomal_protein_L12-like
LOC121428758	2.24e-45	0.318937	0.922	0.609	3.96e-41	2	peroxiredoxin-6-like
LOC121416898	1.68e-44	0.289145	0.863	0.52	2.96e-40	2	60S_ribosomal_protein_L12-like
LOC121418834	5.33e-44	0.344466	0.749	0.431	9.4e-40	2	uncharacterized_LOC121418834
LOC121431829	8.16e-44	0.271692	0.892	0.531	1.44e-39	2	ras_GTPase-activating_protein-binding_protein_2-like
LOC121424922	7.79e-41	0.317804	0.966	0.666	1.38e-36	2	small_nuclear_ribonucleoprotein_G-like
LOC121428202	4.58e-40	0.272987	0.968	0.728	8.07e-36	2	Y-box_factor_homolog
LOC121430258	7.18e-40	0.310416	0.982	0.792	1.27e-35	2	sodium/potassium-transporting_ATPase_subunit_beta-3-like
LOC121428217	8.08e-39	0.264735	0.867	0.522	1.43e-34	2	nucleolin-like
LOC121415559	3.27e-38	0.323312	0.968	0.706	5.76e-34	2	translocon-associated_protein_subunit_beta-like
LOC121410556	5.94e-38	-0.382975	0.981	0.948	1.05e-33	2	procathepsin_L-like
LOC121409239	1.7e-36	0.265045	0.982	0.745	2.99e-32	2	14-3-3_family_protein_artA-like
LOC121415818	8.6e-36	0.26499	0.901	0.573	1.52e-31	2	ATP_synthase_subunit_alpha,_mitochondrial-like
LOC121427605	1.23e-35	0.270042	0.987	0.769	2.17e-31	2	translocon-associated_protein_subunit_gamma-like
LOC121413371	2.69e-33	0.423723	0.288	0.142	4.74e-29	2	uncharacterized_LOC121413371
LOC121415581	5.26e-32	0.251546	0.923	0.619	9.29e-28	2	keratinocyte-associated_protein_2-like
LOC121427769	2.07e-24	0.335373	1	0.996	3.65e-20	2	ATP-dependent_translocase_ABCB1-like
LOC121408814	1.58e-23	0.279043	0.975	0.806	2.78e-19	2	dynein_light_chain_LC6,_flagellar_outer_arm-like
LOC121428833	1.73e-20	-0.36395	0.445	0.26	3.06e-16	2	heat_shock_70_kDa_protein_IV
LOC121431891	1.12e-18	-0.342032	0.46	0.268	1.97e-14	2	uncharacterized_LOC121431891
LOC121408096	5.09e-16	-0.250384	0.307	0.176	8.98e-12	2	pre-mRNA-splicing_factor_ATP-dependent_RNA_helicase_PRP16-like
LOC121427162	4.77e-15	0.318387	0.544	0.385	8.41e-11	2	chymotrypsin_B-like
LOC121428770	5.04e-15	-0.252431	0.316	0.184	8.89e-11	2	collagen_alpha-1(I)_chain-like
LOC121421104	2.48e-12	-0.363278	0.903	0.71	4.38e-08	2	NADH-cytochrome_b5_reductase_3-like
LOC121431449	1.72e-11	-0.38791	0.882	0.699	3.03e-07	2	melanotransferrin-like
LOC121407258	3.01e-11	-0.397327	0.862	0.715	5.31e-07	2	development-specific_protein_LVN1.2-like
LOC121430638	2.95e-10	-0.794698	0.444	0.423	5.2e-06	2	monocarboxylate_transporter_2-like
LOC121423913	1.19e-09	-0.272316	0.295	0.186	2.11e-05	2	growth/differentiation_factor_8-like
LOC121430945	1.33e-09	-0.269485	0.423	0.272	2.35e-05	2	poly(U)-specific_endoribonuclease-like
LOC121405615	4.81e-09	-0.377742	0.306	0.194	8.49e-05	2	U6_spliceosomal_RNA
LOC121424800	5e-09	-0.26338	0.297	0.191	8.82e-05	2	prominin-1-A-like
LOC121411391	8.4e-09	-0.258119	0.48	0.311	0.000148169	2	epoxide_hydrolase_3-like
LOC121406050	9.37e-09	-0.259863	0.561	0.36	0.000165272	2	uncharacterized_LOC121406050
LOC121415209	3.3e-08	-0.734233	0.332	0.339	0.000581504	2	MAM_and_LDL-receptor_class_A_domain-containing_protein_1-like
LOC121411605	6.33e-08	-0.269903	0.555	0.359	0.0011168	2	myosin-2_essential_light_chain-like
LOC121429660	7.84e-08	-0.271457	0.369	0.244	0.00138391	2	uncharacterized_LOC121429660
LOC121422986	1.67e-07	-0.638386	0.541	0.464	0.00293983	2	aquaporin-8-like
LOC121423602	5.73e-07	-0.257442	0.507	0.339	0.0101031	2	hydroxymethylglutaryl-CoA_synthase_1-like
LOC121407873	8.68e-07	-0.308327	0.445	0.296	0.0153161	2	caveolin-3-like
LOC121410742	2.13e-06	-0.303794	0.26	0.175	0.0376525	2	guanosine-3',5'-bis(diphosphate)_3'-pyrophosphohydrolase_MESH1-like
LOC121430031	2.23e-06	-0.350224	0.327	0.222	0.0393626	2	arginine_and_glutamate-rich_protein_1-like
LOC121410963	4.18e-06	-0.297422	0.26	0.178	0.0737086	2	dipeptidyl_peptidase_1-like
LOC121407387	4.92e-06	-0.73872	0.306	0.309	0.0868128	2	uncharacterized_LOC121407387
LOC121424915	5.52e-06	-0.301164	0.401	0.274	0.0973938	2	aqualysin-1-like
LOC121422288	5.73e-06	-0.269984	0.865	0.745	0.101147	2	fatty_acid_synthase-like
LOC121416581	8.9e-06	-0.35101	0.42	0.286	0.156982	2	elongation_of_very_long_chain_fatty_acids_protein_6-like
LOC121407516	1.46e-05	-0.292542	0.563	0.374	0.256992	2	coiled-coil_domain-containing_protein_134-like
LOC121416026	1.59e-05	-0.315599	0.339	0.234	0.280206	2	cathepsin_B-like
LOC121426128	2.04e-05	-0.254954	0.254	0.177	0.359333	2	lanosterol_synthase-like
LOC121416464	3.88e-05	-0.255493	0.684	0.459	0.685074	2	cytochrome_P450_2C15-like
LOC121418011	5.73e-05	-0.339343	0.291	0.204	1	2	organic_solute_transporter_subunit_alpha-like
LOC121407392	9.35e-05	-0.360146	0.855	0.631	1	2	subtilisin-chymotrypsin_inhibitor-2B-like
LOC121426907	9.9e-05	-0.304002	0.391	0.273	1	2	methylsterol_monooxygenase_1-like
LOC121409148	0.000169696	-0.354205	0.321	0.228	1	2	dentin_matrix_acidic_phosphoprotein_1-like
LOC121429138	0.000291522	-0.256466	0.886	0.701	1	2	glutamine_synthetase-like
LOC121411239	0.000326745	-0.363649	0.251	0.178	1	2	uncharacterized_LOC121411239
LOC121410044	0.000328419	-0.31656	0.301	0.217	1	2	progranulin-like
LOC121431868	0.000392823	-0.317842	0.29	0.209	1	2	uncharacterized_LOC121431868
LOC121424835	0.00040782	-0.322708	0.258	0.186	1	2	Y+L_amino_acid_transporter_2-like
LOC121413578	0.00116424	-0.779182	0.35	0.253	1	2	uncharacterized_LOC121413578
LOC121418486	0.00121422	-0.440017	0.497	0.35	1	2	RNA-binding_protein_Nova-1-like
LOC121418416	0.00357069	-0.34738	0.26	0.194	1	2	uncharacterized_LOC121418416
LOC121412403	0.00765377	-0.420518	0.479	0.346	1	2	extracellular_matrix_protein_3
LOC121415523	0.0192219	-0.339528	0.281	0.215	1	2	ganglioside_GM2_activator-like
LOC121411241	0.021555	-0.372769	0.501	0.36	1	2	phosphoserine_aminotransferase-like
LOC121419156	0.0276742	-0.278953	0.631	0.456	1	2	cytochrome_P450_3A24-like
LOC121414246	0.0368069	-0.262945	0.743	0.507	1	2	V-type_proton_ATPase_16_kDa_proteolipid_subunit-like
LOC121418551	0.0610881	-0.306177	0.648	0.471	1	2	SPARC-related_modular_calcium-binding_protein_1-like
LOC121410788	0.064134	-0.51224	0.298	0.274	1	2	uncharacterized_LOC121410788
LOC121424351	0.177875	-0.332251	0.66	0.474	1	2	uncharacterized_LOC121424351
LOC121431731	0.183937	-0.264752	0.808	0.627	1	2	stearoyl-CoA_desaturase_5-like
LOC121429286	0.241003	0.263629	0.999	0.999	1	2	uncharacterized_LOC121429286
LOC121421629	0.244054	-0.341431	0.626	0.459	1	2	gamma-butyrobetaine_dioxygenase-like
LOC121415355	0.248662	-0.297217	0.726	0.509	1	2	protein_disulfide-isomerase_A3-like
LOC121411282	0.31224	-0.35939	0.732	0.542	1	2	aminopeptidase_N-like
LOC121431674	0.356523	-0.399761	0.72	0.529	1	2	glutamyl_aminopeptidase-like
LOC121430636	0.408388	-0.264733	0.819	0.601	1	2	lysosomal-associated_transmembrane_protein_4A-like
LOC121429020	0.409747	-0.352947	0.639	0.467	1	2	probable_maltase
LOC121419318	0.426045	-0.448502	0.323	0.258	1	2	hepatocyte_nuclear_factor_3-beta-like
LOC121431604	0.490048	-0.376069	0.688	0.525	1	2	steroid_17-alpha-hydroxylase/17,20_lyase-like
LOC121423170	0.521953	-0.290806	0.754	0.552	1	2	CD63_antigen-like
LOC121427224	0.628444	-0.259459	0.785	0.568	1	2	ATP-dependent_translocase_ABCB1-like
LOC121415619	0.629233	-0.433877	0.378	0.308	1	2	ZP_domain-containing_protein-like
LOC121429193	0.672072	-0.450867	0.465	0.357	1	2	high_affinity_copper_uptake_protein_1-like
LOC121410441	0.789021	-0.524893	0.347	0.282	1	2	metalloproteinase_inhibitor_3-like
LOC121428095	0.902864	-0.364555	0.653	0.481	1	2	tubulin_beta_chain-like
LOC121418656	8.29e-132	-0.696274	1	1	1.46e-127	3	fatty_acid-binding_protein_type_3-like
LOC121421553	1.5e-95	-0.563499	1	1	2.65e-91	3	soma_ferritin-like
LOC121417078	2.48e-89	-0.513793	1	1	4.37e-85	3	calmodulin-like
LOC121432239	1.88e-80	-0.921207	0.989	0.996	3.31e-76	3	fatty_acid-binding_protein_Fh15-like
LOC121413087	2.85e-79	0.440809	1	0.992	5.02e-75	3	elongation_factor_1-alpha
LOC121427426	6.37e-77	0.733551	0.901	0.711	1.12e-72	3	prohibitin-2-like
LOC121429286	7.2e-73	-0.762649	0.996	0.999	1.27e-68	3	uncharacterized_LOC121429286
gene-DR311-mgr01	2.62e-70	0.498668	1	1	4.61e-66	3
gene-DR311-mgr02	6.28e-66	0.474884	1	1	1.11e-61	3
LOC121407996	2.02e-65	0.66686	0.942	0.788	3.56e-61	3	eukaryotic_translation_initiation_factor_2_subunit_2-like
LOC121409742	2.8e-59	-0.804346	0.945	0.977	4.95e-55	3	uncharacterized_LOC121409742
LOC121426629	4.52e-59	0.721516	0.662	0.372	7.97e-55	3	hydroxyacid_oxidase_1-like
LOC121428312	7.36e-59	-0.407395	0.999	1	1.3e-54	3	actin,_cytoskeletal_1A
LOC100134945	8.73e-56	0.686112	0.813	0.594	1.54e-51	3	mortalin
LOC121406173	2.13e-52	-1.0069	0.746	0.844	3.76e-48	3	uncharacterized_LOC121406173
LOC121407069	2.19e-50	-0.414988	0.999	1	3.87e-46	3	fibropellin-3-like
LOC121414288	2.28e-49	-0.613698	0.901	0.916	4.02e-45	3	tubulin_alpha-1A_chain-like
LOC121430760	7.74e-49	-1.65992	0.224	0.457	1.37e-44	3	actin_CyI,_cytoplasmic-like
LOC121431409	1.1e-48	0.75788	0.317	0.124	1.94e-44	3	pancreatic_lipase-related_protein_2-like
LOC121427508	1.24e-46	-0.662059	0.987	0.989	2.2e-42	3	uncharacterized_LOC121427508
LOC121425505	6.56e-44	0.25662	1	1	1.16e-39	3	60S_ribosomal_protein_L26-like
LOC121422456	2.35e-43	-0.758435	0.93	0.964	4.15e-39	3	uncharacterized_LOC121422456
LOC121429222	3.42e-43	-0.719381	0.911	0.94	6.04e-39	3	uncharacterized_LOC121429222
LOC121418862	6.51e-43	0.571348	0.853	0.613	1.15e-38	3	heat_shock_protein_Hsp-16.48/Hsp-16.49-like
LOC121407061	6.04e-40	0.273621	1	0.997	1.07e-35	3	60S_ribosomal_protein_L13-like
LOC121426187	8.12e-40	-1.32535	0.292	0.485	1.43e-35	3	uncharacterized_LOC121426187
LOC121423228	4.36e-39	0.447371	0.284	0.116	7.69e-35	3	cholesterol_24-hydroxylase-like
LOC121411806	5.89e-39	0.28648	1	0.999	1.04e-34	3	60S_ribosomal_protein_L18a-like
LOC446192	7.98e-39	-0.496314	0.975	0.981	1.41e-34	3	extracellular_matrix_protein_18
LOC121415845	2.1e-38	0.528571	0.384	0.188	3.71e-34	3	stomatin-like_protein_2,_mitochondrial
LOC121424994	1.36e-36	-0.301836	1	1	2.4e-32	3	uncharacterized_LOC121424994
LOC121426071	9.97e-35	0.496929	0.287	0.126	1.76e-30	3	asparagine_synthetase_[glutamine-hydrolyzing]-like
LOC121431021	1.21e-34	-0.272259	1	1	2.13e-30	3	40S_ribosomal_protein_S12-like
LOC121421128	2.17e-34	0.250398	1	0.998	3.83e-30	3	40S_ribosomal_protein_S10-like
LOC121408427	3.68e-34	0.498288	0.695	0.478	6.49e-30	3	coiled-coil-helix-coiled-coil-helix_domain-containing_protein_2-like
LOC121410604	1.66e-33	0.507466	0.707	0.488	2.92e-29	3	serine--tRNA_ligase,_cytoplasmic-like
LOC121429771	5.62e-32	0.559805	0.28	0.128	9.91e-28	3	medium-chain_acyl-CoA_ligase_ACSF2,_mitochondrial-like
LOC121410256	1.48e-31	-1.12176	0.213	0.401	2.61e-27	3	rho-related_protein_racA-like
LOC121418481	5.92e-31	0.439941	0.37	0.192	1.05e-26	3	cytochrome_P450_3A24-like
LOC121419032	7.4e-31	-0.44091	0.938	0.94	1.3e-26	3	cofilin-like
LOC121424951	3.05e-30	-0.900097	0.068	0.253	5.37e-26	3	uncharacterized_LOC121424951
LOC121423851	1.74e-28	-0.450051	0.982	0.983	3.07e-24	3	uncharacterized_LOC121423851
LOC121419182	1.12e-27	0.50705	0.328	0.172	1.97e-23	3	bifunctional_glutamate/proline--tRNA_ligase-like
LOC121429015	6.73e-27	0.445664	0.396	0.226	1.19e-22	3	pyrroline-5-carboxylate_reductase_1,_mitochondrial-like
LOC121423590	7.01e-27	0.479956	0.401	0.236	1.24e-22	3	phenylalanine--tRNA_ligase_alpha_subunit-like
LOC121408340	3.74e-26	-0.743841	0.672	0.715	6.6e-22	3	CCAAT/enhancer-binding_protein_alpha-like
LOC121410512	4.16e-26	0.4303	0.508	0.326	7.33e-22	3	mitochondrial_import_inner_membrane_translocase_subunit_Tim17-B-like
LOC121430679	5.14e-25	0.447287	0.514	0.332	9.07e-21	3	eukaryotic_translation_initiation_factor_2_subunit_1-like
LOC121418762	6.08e-25	-0.836487	0.461	0.581	1.07e-20	3	fos-related_antigen_1-like
LOC121411826	7.75e-25	0.389099	0.596	0.404	1.37e-20	3	mitochondrial_import_inner_membrane_translocase_subunit_Tim16-like
LOC121423262	1.04e-24	-0.874875	0.15	0.321	1.83e-20	3	chromobox_protein_homolog_8-like
LOC121411359	2.41e-24	0.474583	0.303	0.161	4.25e-20	3	alternative_oxidase,_mitochondrial-like
LOC121408202	2.64e-24	0.556641	0.467	0.296	4.66e-20	3	A-kinase_anchor_protein_1,_mitochondrial-like
LOC121425603	2.69e-23	-0.442339	0.955	0.958	4.74e-19	3	periostin-like
LOC121427437	1.38e-22	0.390666	0.554	0.366	2.43e-18	3	ATPase_family_AAA_domain-containing_protein_3-B-like
LOC121415203	1.42e-22	-1.02987	0.376	0.495	2.5e-18	3	E3_ubiquitin-protein_ligase_arih1-like
LOC121408594	3.76e-22	0.414729	0.445	0.282	6.64e-18	3	solute_carrier_family_43_member_3-like
LOC121422540	5.53e-21	-0.635856	0.501	0.617	9.76e-17	3	uncharacterized_protein_K02A2.6-like
LOC121427624	6.34e-21	-0.386726	0.878	0.876	1.12e-16	3	development-specific_protein_LVN1.2-like
LOC121428399	6.4e-20	-0.910864	0.314	0.436	1.13e-15	3	actin_CyI,_cytoplasmic
LOC121428219	1.13e-19	-0.413986	0.838	0.847	1.99e-15	3	vesicle-associated_membrane_protein_3-like
LOC121413613	2.71e-19	0.501733	0.804	0.683	4.78e-15	3	uncharacterized_LOC121413613
LOC121423022	4.3e-19	-0.785351	0.261	0.394	7.59e-15	3	mitogen-activated_protein_kinase_kinase_kinase_13-like
LOC121426055	4.33e-19	0.360525	0.916	0.802	7.64e-15	3	cytochrome_c-like
LOC121428519	4.83e-19	-0.643488	0.308	0.442	8.52e-15	3	actin-15B
LOC121408911	1.03e-18	0.350265	0.701	0.532	1.82e-14	3	major_vault_protein
LOC121406364	1.24e-18	-0.703035	0.276	0.414	2.19e-14	3	uncharacterized_LOC121406364
LOC121422407	1.61e-18	-0.428981	0.875	0.889	2.84e-14	3	histone_H1-delta-like
LOC121431725	1.77e-18	0.320253	0.7	0.531	3.12e-14	3	uncharacterized_LOC121431725
LOC121425645	2.89e-18	0.347267	0.633	0.477	5.09e-14	3	lupus_La_protein_homolog
LOC121415315	5.65e-18	-0.723847	0.243	0.381	9.98e-14	3	cyclic_AMP-responsive_element-binding_protein_3-like_protein_4
LOC121411662	6.78e-18	0.299719	0.893	0.758	1.2e-13	3	phosphate_carrier_protein,_mitochondrial-like
LOC121406318	8.46e-18	-0.766248	0.191	0.329	1.49e-13	3	trichohyalin-like
LOC121428736	1.81e-17	-1.09147	0.418	0.514	3.19e-13	3	major_yolk_protein-like
LOC121415060	2.1e-17	-0.633664	0.145	0.283	3.7e-13	3	uncharacterized_LOC121415060
LOC121418955	2.36e-17	-0.318657	0.918	0.886	4.16e-13	3	uncharacterized_LOC121418955
LOC121414272	4.69e-17	0.289576	0.604	0.433	8.27e-13	3	eukaryotic_translation_initiation_factor_2_subunit_3
LOC121423158	9.98e-17	-0.357082	0.832	0.835	1.76e-12	3	apolipoprotein_D-like
LOC121419157	1.05e-16	-0.670047	0.65	0.709	1.85e-12	3	cytochrome_P450_3A6-like
LOC121430841	1.34e-16	-0.256392	0.976	0.971	2.37e-12	3	40S_ribosomal_protein_S21-like
LOC121428381	2.38e-16	0.325833	0.372	0.242	4.2e-12	3
LOC121423143	2.66e-16	-0.769117	0.22	0.347	4.7e-12	3	fascin-like
LOC121422288	3.47e-16	-0.48356	0.746	0.77	6.11e-12	3	fatty_acid_synthase-like
LOC121422462	4.91e-16	0.337779	0.766	0.626	8.67e-12	3	prohibitin-like
LOC121411065	4.96e-16	0.316955	0.251	0.145	8.75e-12	3	methionine--tRNA_ligase,_cytoplasmic-like
LOC121410666	1.04e-15	-0.551323	0.657	0.661	1.84e-11	3	protein_BTG1-like
LOC121422216	1.11e-15	0.279811	0.343	0.219	1.95e-11	3	DNA-directed_RNA_polymerase_I_subunit_RPA49-like
LOC121431114	1.84e-15	0.301425	0.539	0.378	3.25e-11	3	elongation_factor_1-alpha_2-like
LOC121406953	2.14e-15	-0.470316	0.72	0.734	3.77e-11	3
LOC121418514	2.83e-15	-1.12602	0.968	0.947	5e-11	3	uncharacterized_LOC121418514
LOC121407090	4.62e-15	0.304277	0.684	0.544	8.14e-11	3	translocon-associated_protein_subunit_alpha-like
LOC121432073	4.88e-15	-0.541925	0.532	0.601	8.61e-11	3	acyl-CoA_6-desaturase-like
LOC121405946	5.48e-15	0.296731	0.538	0.385	9.67e-11	3	tyrosine_3-monooxygenase-like
LOC121407258	1.24e-14	0.367207	0.828	0.732	2.19e-10	3	development-specific_protein_LVN1.2-like
LOC121412153	1.41e-14	0.271286	0.275	0.164	2.49e-10	3	telomerase_protein_component_1-like
LOC121407873	1.85e-14	0.279075	0.439	0.31	3.27e-10	3	caveolin-3-like
LOC121407995	2.09e-14	0.361946	0.259	0.157	3.68e-10	3	uncharacterized_LOC121407995
LOC121417089	5.11e-14	0.262994	0.253	0.151	9.02e-10	3	protein_archease-like
LOC121410340	1.28e-13	0.311011	0.361	0.247	2.25e-09	3	39S_ribosomal_protein_L9,_mitochondrial-like
LOC121408794	1.41e-13	0.321413	0.37	0.251	2.48e-09	3	clustered_mitochondria_protein_homolog
LOC121410020	1.46e-13	-0.576049	0.307	0.422	2.58e-09	3	S-adenosylmethionine_sensor_upstream_of_mTORC1-like
LOC121415546	2.26e-13	0.27277	0.564	0.406	3.99e-09	3	asparagine--tRNA_ligase,_cytoplasmic-like
LOC121429030	3.2e-13	-0.54617	0.575	0.624	5.64e-09	3	immediate_early_response_gene_5-like_protein
LOC121411897	3.99e-13	0.267373	0.287	0.182	7.04e-09	3	G_patch_domain-containing_protein_4-like
LOC121424764	1.33e-12	0.27264	0.338	0.228	2.34e-08	3	nucleolar_protein_56-like
LOC121431622	1.34e-12	-0.818482	0.317	0.411	2.36e-08	3	uncharacterized_LOC121431622
LOC121423744	3.1e-12	-0.470201	0.157	0.272	5.48e-08	3	Krueppel-like_factor_5
LOC121431730	3.47e-12	0.251181	0.426	0.307	6.12e-08	3	outer_mitochondrial_transmembrane_helix_translocase-like
LOC121411459	3.58e-12	0.258312	0.401	0.284	6.31e-08	3	inactive_histone-lysine_N-methyltransferase_2E-like
LOC121427830	3.85e-12	0.295444	0.299	0.194	6.79e-08	3	leucine-rich_repeat-containing_protein_47-like
LOC121425403	4.51e-12	-0.422377	0.696	0.713	7.96e-08	3	hexokinase-2-like
LOC121411534	5.49e-12	0.264687	0.613	0.477	9.69e-08	3	eukaryotic_translation_initiation_factor_5B-like
LOC121415350	5.68e-12	0.261652	0.351	0.242	1e-07	3	dnaJ_homolog_subfamily_C_member_21-like
LOC121409315	6.01e-12	-0.546237	0.154	0.261	1.06e-07	3	BTB/POZ_domain-containing_adapter_for_CUL3-mediated_RhoA_degradation_protein_3-like
LOC121428930	7.77e-12	-0.748906	0.387	0.475	1.37e-07	3	heme-binding_protein_2-like
LOC121420440	1.2e-11	0.731467	0.562	0.44	2.12e-07	3	cytochrome_P450_3A8-like
LOC121415073	2.01e-11	0.286526	0.371	0.263	3.54e-07	3	fructose-1,6-bisphosphatase_1-like
LOC121423147	2.28e-11	0.260021	0.787	0.658	4.02e-07	3	NADH_dehydrogenase_[ubiquinone]_1_alpha_subcomplex_subunit_6-like
LOC121423799	3.94e-11	-0.568177	0.528	0.572	6.94e-07	3	MAP_kinase-interacting_serine/threonine-protein_kinase_1-like
LOC121419338	5.57e-11	-0.80999	0.258	0.357	9.83e-07	3	ADP-ribosylation_factor-like
LOC121407990	5.89e-11	0.266826	0.461	0.348	1.04e-06	3	NEDD8
LOC121428886	8.7e-11	-0.792492	0.201	0.295	1.53e-06	3	metallothionein-A-like
LOC121427349	1.57e-10	-0.438666	0.729	0.704	2.76e-06	3	cholinesterase_1-like
LOC121423422	1.79e-10	-0.571425	0.353	0.44	3.16e-06	3	aldehyde_dehydrogenase,_mitochondrial-like
LOC121415947	5.56e-10	-0.543281	0.333	0.425	9.81e-06	3	phosphatidate_phosphatase_LPIN3-like
LOC121408173	1.19e-09	-0.608945	0.437	0.509	2.1e-05	3	nucleoredoxin-like
LOC121418929	7.93e-09	-0.559349	0.193	0.28	0.000139977	3	circularly_permutated_Ras_protein_1-like
LOC121423647	1.11e-08	-0.511855	0.389	0.458	0.000195362	3	transcription_factor_AP-1-like
LOC121411746	4.27e-08	-0.497401	0.234	0.322	0.000753179	3	sodium-_and_chloride-dependent_GABA_transporter_1-like
LOC121427176	6.11e-08	-0.424665	0.487	0.544	0.00107761	3	nose_resistant_to_fluoxetine_protein_6-like
LOC121415190	9.06e-08	-0.413641	0.536	0.579	0.00159903	3	bcl-2-like_protein_2
LOC121411553	9.31e-08	-0.453845	0.416	0.478	0.00164321	3	uncharacterized_LOC121411553
LOC121405875	1.11e-07	-0.519811	0.192	0.272	0.00196103	3	F-actin-monooxygenase_MICAL3-like
LOC121413372	1.41e-07	-0.580149	0.189	0.264	0.00248616	3	uncharacterized_LOC121413372
LOC121415035	2.99e-07	-0.42404	0.432	0.501	0.00527785	3	rho_guanine_nucleotide_exchange_factor_18-like
LOC121417256	3e-07	-0.275102	0.697	0.701	0.00529528	3	uncharacterized_LOC121417256
LOC121426180	3.89e-07	-0.375733	0.503	0.545	0.00685945	3	1-phosphatidylinositol_4,5-bisphosphate_phosphodiesterase_delta-4-like
LOC121419865	4.06e-07	-0.312148	0.605	0.634	0.00716499	3	acyl-CoA_6-desaturase-like
LOC121415224	5.78e-07	-0.397464	0.401	0.463	0.0102036	3	non-lysosomal_glucosylceramidase-like
LOC121415891	7.78e-07	-0.433015	0.259	0.335	0.0137326	3	sodium-dependent_phosphate_transporter_2-like
LOC121418340	7.89e-07	-0.255329	0.792	0.768	0.0139296	3	NPC_intracellular_cholesterol_transporter_2_homolog_a-like
LOC121418776	1.3e-06	-0.309979	0.563	0.584	0.0228803	3	peptidyl-prolyl_cis-trans_isomerase_FKBP2-like
LOC121412919	1.34e-06	-0.40443	0.196	0.272	0.0235886	3	protein_Shroom2-like
LOC121415989	1.41e-06	-0.44786	0.279	0.35	0.0248819	3	transcription_factor_HIVEP3-like
LOC121426318	2.15e-06	-0.376211	0.417	0.481	0.0378481	3	angiotensin-converting_enzyme-like
LOC121408307	2.28e-06	-0.434821	0.521	0.556	0.0402239	3	glutamic_acid-rich_protein-like
LOC121418873	4.78e-06	-0.2727	0.699	0.697	0.0843841	3	aquaporin-8-like
LOC121409246	5.92e-06	-0.367308	0.205	0.276	0.104469	3	transcription_intermediary_factor_1-alpha-like
LOC121419389	6.42e-06	-0.3413	0.591	0.598	0.113244	3	mRNA_decay_activator_protein_ZFP36L2-A-like
LOC121411918	7.19e-06	-0.422067	0.25	0.32	0.126793	3	protein_diaphanous_homolog_2-like
LOC121411576	7.71e-06	-0.439694	0.263	0.329	0.135963	3	protein_DD3-3-like
LOC121426747	7.75e-06	-0.349393	0.192	0.264	0.136664	3	uncharacterized_LOC121426747
LOC121428758	7.78e-06	-0.26047	0.672	0.666	0.137295	3	peroxiredoxin-6-like
LOC121415894	8.87e-06	-0.365851	0.463	0.501	0.156547	3	polyubiquitin-C-like
LOC121405722	1.09e-05	-0.320975	0.338	0.408	0.192619	3	src_substrate_cortactin-like
LOC121428095	1.13e-05	-0.382911	0.482	0.517	0.199266	3	tubulin_beta_chain-like
LOC121422319	1.21e-05	-0.364672	0.514	0.541	0.212889	3	probable_serine_incorporator
LOC121411189	1.51e-05	-0.357647	0.286	0.356	0.26558	3	ras-related_protein_Rab-11B-like
LOC121426152	1.56e-05	-0.368567	0.493	0.528	0.275384	3	acyl-CoA-binding_protein-like
LOC121428833	1.77e-05	-0.733152	0.234	0.301	0.311904	3	heat_shock_70_kDa_protein_IV
LOC121407706	1.92e-05	-0.357895	0.366	0.427	0.338933	3	membrane-associated_progesterone_receptor_component_1-like
LOC121427237	2.68e-05	-0.37433	0.213	0.278	0.473117	3	uncharacterized_LOC121427237
LOC121431014	3.37e-05	-0.323279	0.512	0.536	0.595465	3	annexin_B9-like
LOC121414262	3.68e-05	-0.403061	0.228	0.289	0.649643	3	uncharacterized_LOC121414262
LOC121426523	4.04e-05	-0.339662	0.641	0.64	0.712071	3	pituitary_tumor-transforming_gene_1_protein-interacting_protein-like
LOC121411346	4.72e-05	-0.410356	0.446	0.469	0.833564	3	uncharacterized_LOC121411346
LOC121428459	4.98e-05	-0.504763	0.607	0.604	0.878965	3	endoplasmic_reticulum_chaperone_BiP-like
LOC121420375	6.05e-05	-0.332694	0.559	0.563	1	3	sodium/potassium-transporting_ATPase_subunit_alpha-3-like
LOC121415785	6.49e-05	-0.308086	0.386	0.435	1	3	polyubiquitin-C
LOC121408325	7.48e-05	-0.293437	0.587	0.588	1	3	charged_multivesicular_body_protein_4b-like
LOC121422412	8.18e-05	-0.308323	0.268	0.332	1	3	WASH_complex_subunit_2-like
LOC121423991	9.61e-05	-0.341242	0.387	0.429	1	3	next_to_BRCA1_gene_1_protein-like
LOC121420447	0.000103929	-0.351439	0.257	0.318	1	3	sushi_domain-containing_protein_2-like
LOC121425408	0.000111373	-0.287169	0.2	0.263	1	3	myoferlin-like
LOC121424790	0.000115244	-0.377732	0.204	0.265	1	3	uncharacterized_LOC121424790
LOC121405859	0.000160859	-0.546277	0.404	0.444	1	3	uncharacterized_LOC121405859
LOC121424084	0.000170262	-0.359123	0.239	0.295	1	3	uncharacterized_LOC121424084
LOC121411860	0.000183105	-0.253224	0.699	0.677	1	3	caveolin-3-like
LOC121412046	0.000278376	-0.32464	0.313	0.364	1	3	uncharacterized_LOC121412046
LOC121426430	0.000328744	-0.359793	0.245	0.297	1	3	trichohyalin-like
LOC121431604	0.000380873	-0.254938	0.525	0.558	1	3	steroid_17-alpha-hydroxylase/17,20_lyase-like
LOC121431605	0.000431233	-0.259211	0.538	0.555	1	3	gelsolin-like_protein_1
LOC121418566	0.000442709	-0.271678	0.237	0.292	1	3	uncharacterized_LOC121418566
LOC121418034	0.000640118	-0.332761	0.522	0.536	1	3	cellular_retinoic_acid-binding_protein_2-like
LOC121418883	0.000669525	-0.279054	0.359	0.41	1	3	spectrin_beta_chain,_non-erythrocytic_1-like
LOC121420173	0.000798318	-0.325944	0.212	0.26	1	3	uncharacterized_LOC121420173
LOC121422794	0.000881816	-0.299734	0.213	0.263	1	3	adipocyte_plasma_membrane-associated_protein-like
LOC121406698	0.000915769	-0.269162	0.2	0.253	1	3	la-related_protein_1-like
LOC121431611	0.00103186	-0.288731	0.283	0.335	1	3	gelsolin-like_protein_2
LOC121405901	0.00111909	-0.344454	0.374	0.409	1	3	retinol_dehydrogenase_8-like
LOC121411556	0.00120887	-0.385528	0.362	0.399	1	3	thyrotroph_embryonic_factor-like
LOC121414301	0.00124611	-0.289755	0.239	0.288	1	3	uncharacterized_LOC121414301
LOC121411258	0.0012502	-0.295442	0.387	0.428	1	3	cholinesterase_1-like
LOC121431795	0.00128292	-0.296218	0.309	0.36	1	3	marginal_zone_B-_and_B1-cell-specific_protein-like
LOC121424846	0.00132757	-0.260982	0.278	0.333	1	3	drebrin-like_protein_B
LOC121425215	0.00140902	-0.331626	0.209	0.257	1	3	myosin_light_chain_kinase,_smooth_muscle-like
LOC121410368	0.00153952	-0.292855	0.318	0.363	1	3	talin-1-like
LOC121417276	0.0018336	-0.25522	0.2	0.25	1	3	uncharacterized_LOC121417276
LOC121426907	0.00197588	-0.290556	0.254	0.299	1	3	methylsterol_monooxygenase_1-like
LOC121410398	0.0020601	-0.264605	0.283	0.33	1	3	sulfite_oxidase-like
LOC121411075	0.00223783	-0.312823	0.4	0.431	1	3	mitochondrial_10-formyltetrahydrofolate_dehydrogenase-like
LOC121406199	0.00243324	-0.358152	0.351	0.391	1	3	cryptochrome-1-like
LOC121411243	0.00259041	-0.282321	0.297	0.339	1	3	programmed_cell_death_6-interacting_protein-like
LOC121419382	0.00299765	-0.304506	0.38	0.414	1	3	delta(14)-sterol_reductase_TM7SF2-like
LOC121412198	0.00303478	-0.259522	0.295	0.339	1	3	sulfotransferase_4A1-like
LOC121405738	0.00540376	-0.26508	0.396	0.431	1	3	staphylococcal_nuclease_domain-containing_protein_1-like
LOC121410067	0.00656987	-0.263345	0.225	0.268	1	3	ectopic_P_granules_protein_5_homolog
LOC121424789	0.00757813	-0.269937	0.472	0.486	1	3	pantothenate_kinase_3-like
LOC121417317	0.00822113	-0.269109	0.276	0.313	1	3	putative_defense_protein_1
LOC121409148	0.00875302	-0.257646	0.209	0.25	1	3	dentin_matrix_acidic_phosphoprotein_1-like
LOC121429604	0.00898975	-0.285964	0.372	0.398	1	3	mid1-interacting_protein_1A-like
LOC121415619	0.00945535	-0.502773	0.295	0.324	1	3	ZP_domain-containing_protein-like
LOC121418559	0.00956715	-0.251517	0.363	0.391	1	3	methylmalonate-semialdehyde_dehydrogenase_[acylating],_mitochondrial-like
LOC121425739	0.0107902	-0.300295	0.339	0.372	1	3	TBC1_domain_family_member_14-like
LOC121407934	0.0166603	-0.278637	0.249	0.283	1	3	soluble_scavenger_receptor_cysteine-rich_domain-containing_protein_SSC5D-like
LOC121411747	0.0185173	-0.259538	0.346	0.376	1	3	sodium-_and_chloride-dependent_GABA_transporter_2-like
LOC121427162	0.0282124	-0.341413	0.409	0.415	1	3	chymotrypsin_B-like
LOC121427592	0.0304728	-0.363403	0.253	0.281	1	3	translocation_protein_SEC62-like
LOC121420333	0.0343835	-0.254912	0.312	0.34	1	3	uncharacterized_LOC121420333
LOC121408055	0.0345367	-0.257788	0.264	0.291	1	3	core-binding_factor_subunit_beta-like
LOC121416581	0.0353916	-0.265921	0.286	0.314	1	3	elongation_of_very_long_chain_fatty_acids_protein_6-like
LOC121431580	0.0365821	-0.253945	0.386	0.405	1	3	broad_substrate_specificity_ATP-binding_cassette_transporter_ABCG2-like
LOC121411571	0.0405126	-0.254147	0.338	0.361	1	3	synaptophysin-like
LOC121408320	0.0454015	-0.251003	0.368	0.39	1	3	NPC_intracellular_cholesterol_transporter_1-like
LOC121422798	0.059234	-0.260826	0.392	0.402	1	3	uncharacterized_LOC121422798
LOC121422281	0.0799886	-0.266166	0.601	0.564	1	3	ATP-dependent_RNA_helicase_dbp2-like
LOC121413578	0.117803	-0.48317	0.253	0.273	1	3	uncharacterized_LOC121413578
LOC121419156	0.138621	-0.265777	0.499	0.487	1	3	cytochrome_P450_3A24-like
LOC121431891	0.568017	-0.330738	0.307	0.303	1	3	uncharacterized_LOC121431891
LOC121418947	5.73e-245	1.19359	0.577	0.101	1.01e-240	4	centromere_protein_F-like
LOC121430633	5.14e-237	0.869744	0.409	0.046	9.06e-233	4	ribonucleoside-diphosphate_reductase_subunit_M2_B-like
LOC121424401	8.42e-201	0.708765	0.411	0.057	1.49e-196	4	structural_maintenance_of_chromosomes_protein_2-like
LOC121429841	2.99e-189	0.618612	0.393	0.055	5.28e-185	4	structural_maintenance_of_chromosomes_protein_4-like
LOC121418953	4.09e-187	0.519936	0.25	0.019	7.22e-183	4	uncharacterized_LOC121418953
LOC121424886	2.17e-186	0.614667	0.284	0.027	3.83e-182	4	nascent_polypeptide-associated_complex_subunit_alpha,_muscle-specific_form-like
LOC121415500	3.5e-179	0.869721	0.403	0.063	6.17e-175	4	late_histone_H1
LOC121408268	4.63e-176	0.519116	0.27	0.025	8.17e-172	4	targeting_protein_for_Xklp2_homolog
LOC121429467	3.13e-175	0.517215	0.3	0.033	5.53e-171	4	G2/mitotic-specific_cyclin-B3-like
LOC121409173	1.79e-163	0.784332	0.604	0.155	3.16e-159	4	centromere_protein_S-like
LOC121431660	3.28e-160	0.503796	0.303	0.038	5.79e-156	4	cyclin-dependent_kinase_1-like
LOC121431754	8.89e-154	0.791903	0.382	0.067	1.57e-149	4	proliferating_cell_nuclear_antigen-like
LOC121416840	3.76e-145	0.677939	0.375	0.068	6.63e-141	4	tyrosine-protein_kinase_BAZ1B-like
LOC121418638	9.73e-145	0.622724	0.398	0.075	1.72e-140	4	claspin-like
LOC121411410	3.76e-144	1.06764	0.876	0.416	6.63e-140	4	acidic_leucine-rich_nuclear_phosphoprotein_32_family_member_B-like
LOC121424941	1.39e-143	0.561796	0.33	0.052	2.46e-139	4	protein_regulator_of_cytokinesis_1-like
LOC121426129	8.05e-143	0.626139	0.418	0.085	1.42e-138	4	replication_protein_A_14_kDa_subunit-like
LOC121423157	1.59e-142	0.550143	0.324	0.051	2.8e-138	4	kinetochore_protein_Nuf2-like
LOC121409399	2.39e-142	0.623875	0.369	0.064	4.22e-138	4	histone_H1-beta,_late_embryonic-like
LOC121405692	5.3e-140	0.541015	0.337	0.055	9.36e-136	4	inner_centromere_protein_A-like
LOC121431885	1.02e-135	0.957955	0.503	0.127	1.8e-131	4	histone_H4
LOC121423171	6.28e-135	0.565361	0.294	0.043	1.11e-130	4	histone_H3,_embryonic
LOC121407840	7.61e-133	0.868607	0.477	0.122	1.34e-128	4	ribonucleoside-diphosphate_reductase_large_subunit-like
LOC121423093	7.9e-130	0.677718	0.325	0.056	1.39e-125	4	DNA_ligase_1-like
LOC121422407	1.47e-121	1.14631	0.989	0.877	2.6e-117	4	histone_H1-delta-like
LOC121423589	1.23e-120	0.683403	0.46	0.12	2.17e-116	4	histone-binding_protein_N1/N2-like
LOC121431800	2.4e-118	0.873459	0.963	0.665	4.23e-114	4	histone_H2A.V
LOC121407732	2.49e-117	0.644194	0.307	0.056	4.39e-113	4	ubiquitin-conjugating_enzyme_E2_C-like
LOC121419329	7.72e-116	0.560183	0.341	0.069	1.36e-111	4	N-alpha-acetyltransferase_40-like
LOC121410608	4.54e-115	0.49052	0.332	0.066	8.02e-111	4	protein_Spindly-B-like
LOC121407826	2.31e-112	0.463611	0.259	0.041	4.08e-108	4	tubulin_beta_chain-like
LOC121415961	1.23e-111	0.473968	0.266	0.043	2.17e-107	4	chromatin_assembly_factor_1_subunit_A-like
LOC121418288	4.57e-110	0.542797	0.418	0.104	8.06e-106	4	barrier-to-autointegration_factor_A-like
LOC121428773	9.94e-109	0.56228	0.27	0.046	1.75e-104	4
LOC121427468	1.42e-108	0.505601	0.484	0.135	2.51e-104	4	tubulin_beta_chain-like
LOC121427143	2.79e-106	0.373281	0.332	0.07	4.92e-102	4	chromatin_accessibility_complex_protein_1-like
LOC121420211	1.72e-102	0.585251	0.409	0.106	3.03e-98	4	uncharacterized_LOC121420211
LOC121429403	5.1e-101	0.45062	0.371	0.088	9.01e-97	4	uncharacterized_LOC121429403
LOC121414288	1.89e-94	0.762108	0.994	0.906	3.33e-90	4	tubulin_alpha-1A_chain-like
LOC121408790	6.66e-93	0.410107	0.291	0.062	1.17e-88	4	replication_protein_A_70_kDa_DNA-binding_subunit-like
LOC121428095	3.46e-92	0.885093	0.869	0.475	6.1e-88	4	tubulin_beta_chain-like
LOC121430881	1.52e-84	0.477926	0.476	0.156	2.69e-80	4	protein_DEK-like
LOC121429222	3.42e-82	-1.0363	0.923	0.938	6.04e-78	4	uncharacterized_LOC121429222
LOC121415393	4.59e-76	0.50806	0.572	0.225	8.1e-72	4	lamin-B1-like
LOC121409148	6.93e-75	0.452179	0.558	0.212	1.22e-70	4	dentin_matrix_acidic_phosphoprotein_1-like
LOC121420998	5e-74	0.586548	0.739	0.348	8.81e-70	4	nucleosome_assembly_protein_1-like_1
LOC121423169	4.3e-72	0.35132	0.254	0.058	7.59e-68	4	histone_H4
LOC121410592	9.72e-71	0.343919	0.396	0.127	1.72e-66	4	dihydrofolate_reductase-like
LOC121429506	4.6e-70	0.447553	0.395	0.129	8.11e-66	4	lymphoid-specific_helicase-like
LOC121423716	1.01e-69	0.414132	0.31	0.086	1.79e-65	4	histone_chaperone_ASF1-like
LOC121422456	2.84e-68	-0.899197	0.96	0.96	5.01e-64	4	uncharacterized_LOC121422456
LOC121416346	5.94e-67	0.362815	0.375	0.12	1.05e-62	4	46_kDa_FK506-binding_nuclear_protein-like
LOC121432107	4.78e-66	0.30674	0.263	0.067	8.44e-62	4	uncharacterized_LOC121432107
LOC121410988	1.63e-65	0.392244	0.45	0.163	2.88e-61	4	structural_maintenance_of_chromosomes_protein_1A-like
LOC121428701	2.72e-65	0.290698	0.267	0.069	4.8e-61	4	DNA_polymerase_epsilon_subunit_3-like
LOC121409126	2.3e-64	0.423438	0.589	0.248	4.05e-60	4	small_nuclear_ribonucleoprotein_Sm_D3-like
LOC121411709	6.87e-64	0.424694	0.67	0.298	1.21e-59	4	uncharacterized_LOC121411709
LOC121429453	2.36e-63	0.495256	0.632	0.285	4.16e-59	4	H/ACA_ribonucleoprotein_complex_subunit_DKC1-like
LOC121410947	1.3e-60	0.521242	0.781	0.4	2.29e-56	4	high_mobility_group_protein_1_homolog
LOC121407069	2.7e-60	-0.455595	1	1	4.76e-56	4	fibropellin-3-like
LOC121429881	6.1e-58	0.324873	0.372	0.129	1.08e-53	4	DNA_polymerase_delta_subunit_3-like
LOC121422827	5.58e-57	0.303255	0.335	0.11	9.84e-53	4	ubiquitin-conjugating_enzyme_E2_S-like
LOC121427191	6.49e-57	0.542122	0.781	0.422	1.15e-52	4	nucleolin-like
LOC121424678	2.22e-56	0.564259	0.831	0.471	3.92e-52	4	mitotic_apparatus_protein_p62-like
LOC121422910	1.04e-55	0.269625	0.257	0.072	1.83e-51	4	centromere_protein_X-like
LOC121416241	3.93e-54	0.360095	0.268	0.08	6.94e-50	4	uncharacterized_LOC121416241
LOC121423059	7.49e-54	0.33599	0.44	0.174	1.32e-49	4	ribosomal_L1_domain-containing_protein_1-like
LOC121422796	1.18e-52	0.374273	0.5	0.213	2.09e-48	4	serrate_RNA_effector_molecule_homolog
LOC121412420	2.95e-52	0.286122	0.384	0.142	5.21e-48	4	putative_oxidoreductase_GLYR1
LOC121424764	3.21e-52	0.382952	0.493	0.212	5.66e-48	4	nucleolar_protein_56-like
LOC121429986	1.17e-51	0.265524	0.253	0.074	2.07e-47	4	ribonuclease_H2_subunit_B-like
LOC121423851	3.5e-51	-0.589645	0.99	0.982	6.18e-47	4	uncharacterized_LOC121423851
LOC121426442	7.3e-51	0.372988	0.616	0.291	1.29e-46	4	hypoxanthine-guanine_phosphoribosyltransferase-like
LOC121420217	3.08e-50	0.298082	0.474	0.198	5.43e-46	4	ribosomal_RNA_processing_protein_1_homolog_A-like
LOC121431716	1.52e-49	0.437533	0.997	0.914	2.68e-45	4	peptidyl-prolyl_cis-trans_isomerase
LOC121411560	1.08e-48	0.252171	0.357	0.132	1.91e-44	4	serine/arginine-rich_splicing_factor_7-like
LOC121413087	1.44e-48	0.3123	1	0.992	2.54e-44	4	elongation_factor_1-alpha
LOC121423036	2.27e-48	0.376994	0.594	0.284	4e-44	4	serine/arginine-rich_splicing_factor_2-like
LOC121418432	2.5e-48	0.414469	0.695	0.361	4.4e-44	4	glycine-rich_RNA-binding_protein_1-like
LOC121424258	5.84e-48	0.293914	0.339	0.124	1.03e-43	4	CTD_small_phosphatase-like_protein
LOC121428217	5.96e-48	0.533722	0.866	0.556	1.05e-43	4	nucleolin-like
LOC121432077	2.06e-47	0.49341	0.93	0.671	3.64e-43	4	heterogeneous_nuclear_ribonucleoprotein_D-like
LOC121428830	2.98e-47	0.404444	0.776	0.421	5.26e-43	4	ubiquitin_carboxyl-terminal_hydrolase_isozyme_L5-like
LOC121409246	1.2e-46	0.383315	0.523	0.242	2.11e-42	4	transcription_intermediary_factor_1-alpha-like
LOC121409946	3.3e-46	0.255144	0.364	0.139	5.82e-42	4	zinc_finger_protein_GIS2-like
LOC121421009	3.86e-46	0.305619	0.398	0.161	6.82e-42	4	ruvB-like_2
LOC121427475	5.07e-46	0.425271	0.77	0.427	8.94e-42	4	chromodomain-helicase-DNA-binding_protein_Mi-2_homolog
LOC121421101	6.51e-46	0.261796	0.317	0.114	1.15e-41	4	protein_arginine_N-methyltransferase_1-like
LOC121418388	6.62e-46	0.366847	0.494	0.221	1.17e-41	4	potassium_channel_subfamily_K_member_10-like
LOC121418777	6.95e-44	0.365911	0.73	0.393	1.23e-39	4	small_nuclear_ribonucleoprotein_Sm_D2
LOC121432239	1.1e-43	-0.426216	0.996	0.995	1.94e-39	4	fatty_acid-binding_protein_Fh15-like
LOC121407324	6.22e-43	0.25046	0.423	0.18	1.1e-38	4	small_nuclear_ribonucleoprotein_Sm_D1-like
LOC121417436	1.2e-42	0.497506	0.868	0.565	2.11e-38	4	proliferation-associated_protein_2G4-like
LOC121428666	1.25e-42	0.25222	0.372	0.149	2.21e-38	4	peptidyl-prolyl_cis-trans_isomerase_NIMA-interacting_1-like
LOC121424051	4.18e-42	0.270544	0.558	0.268	7.37e-38	4	plasminogen_activator_inhibitor_1_RNA-binding_protein-like
LOC121423694	7.87e-42	0.282401	0.537	0.253	1.39e-37	4	transcription_factor_BTF3_homolog_4-like
LOC121409320	3.59e-41	0.301393	0.641	0.322	6.34e-37	4	high_mobility_group_protein_1_homolog
LOC121418202	3.65e-41	0.267786	0.435	0.192	6.45e-37	4	AT-rich_interactive_domain-containing_protein_4A-like
LOC121409076	4.34e-41	0.298297	0.514	0.245	7.66e-37	4	prefoldin_subunit_6-like
LOC121422371	1.76e-40	0.256463	0.291	0.107	3.1e-36	4	alpha-N-acetyl-neuraminyl-2,3-beta-galactosyl-1,3-N-acetyl-galactosaminide_alpha-2,6-sialyltransferase-like
LOC121422447	1.93e-40	0.266692	0.651	0.337	3.4e-36	4	LLGL_scribble_cell_polarity_complex_component_2-like
LOC121418868	3.41e-40	0.2594	0.402	0.173	6.02e-36	4	putative_2'-deoxynucleoside_5'-phosphate_N-hydrolase_1
LOC121421476	5.16e-40	0.384019	0.773	0.439	9.11e-36	4	magnetosome-associated_protein_MamJ-like
LOC121413578	5.59e-40	0.279944	0.51	0.246	9.86e-36	4	uncharacterized_LOC121413578
LOC121410780	4.5e-39	0.318272	0.652	0.343	7.94e-35	4	MKI67_FHA_domain-interacting_nucleolar_phosphoprotein-like
LOC121410794	4.93e-39	0.302267	0.778	0.438	8.7e-35	4	chromobox_protein_homolog_1-like
LOC446198	7.89e-39	0.262932	0.463	0.215	1.39e-34	4	microtubule-associated_protein
LOC121410023	4.16e-38	0.25654	0.561	0.278	7.33e-34	4	28S_ribosomal_protein_S33,_mitochondrial-like
LOC121426894	8.49e-38	0.307155	0.632	0.336	1.5e-33	4	zinc_finger_protein_706-like
LOC121415221	9.38e-38	0.307603	0.71	0.382	1.66e-33	4	eukaryotic_translation_initiation_factor_3_subunit_J-like
LOC121417224	1.96e-37	0.394394	0.848	0.527	3.46e-33	4	pumilio_homolog_2-like
LOC121423267	3.02e-37	0.464183	0.962	0.803	5.33e-33	4	histone_H3.3A
LOC121420316	3.03e-37	0.266837	0.611	0.315	5.35e-33	4	serine/threonine-protein_phosphatase_2A_65_kDa_regulatory_subunit_A_alpha_isoform-like
LOC121427648	3.11e-37	0.461652	0.773	0.463	5.48e-33	4	nucleolin-like
LOC121428750	3.29e-37	0.314636	0.614	0.319	5.8e-33	4	nucleolar_protein_58-like
LOC121423686	3.76e-36	0.267888	0.707	0.38	6.64e-32	4	probable_rRNA-processing_protein_EBP2
LOC121419051	4.94e-36	0.265686	0.584	0.302	8.72e-32	4	heterogeneous_nuclear_ribonucleoprotein_L-like
LOC121427508	3.61e-35	-0.391064	0.989	0.989	6.36e-31	4	uncharacterized_LOC121427508
LOC121429708	5.21e-35	0.260957	0.516	0.26	9.19e-31	4	importin_subunit_alpha-3-like
LOC121428341	6.46e-34	0.345488	0.797	0.482	1.14e-29	4	protein_SET-like
LOC121418700	1.45e-33	0.409718	0.925	0.669	2.55e-29	4	elongation_factor_1-gamma-like
LOC121416183	5.75e-33	0.340994	0.986	0.901	1.01e-28	4	14-3-3-like_protein_2
LOC121427469	2.6e-32	0.424667	0.804	0.503	4.58e-28	4	tubulin_beta-4B_chain-like
LOC121411829	3.81e-32	0.28056	0.741	0.427	6.72e-28	4	inactive_selenide,_water_dikinase-like_protein
LOC121408474	2.3e-31	0.278715	0.614	0.335	4.05e-27	4	RNA-binding_protein_Musashi_homolog_2-like
LOC446192	5.44e-31	-0.433181	0.994	0.979	9.59e-27	4	extracellular_matrix_protein_18
LOC121419382	2.49e-29	0.255137	0.678	0.382	4.4e-25	4	delta(14)-sterol_reductase_TM7SF2-like
LOC121410320	3.75e-29	0.288794	0.741	0.44	6.62e-25	4	heterogeneous_nuclear_ribonucleoprotein_A3-like
LOC121418502	6.83e-29	0.503774	0.506	0.272	1.2e-24	4	calmodulin
LOC121408550	2.15e-28	0.353481	0.821	0.523	3.79e-24	4	GTP-binding_nuclear_protein_Ran-like
LOC121424922	9.12e-28	0.338952	0.942	0.698	1.61e-23	4	small_nuclear_ribonucleoprotein_G-like
LOC121421362	1.87e-27	0.307502	0.487	0.264	3.3e-23	4	uncharacterized_LOC121421362
LOC121410178	2.88e-27	0.286109	0.781	0.478	5.08e-23	4	heterogeneous_nuclear_ribonucleoprotein_A3-like
LOC121423659	2.49e-25	0.294087	0.763	0.482	4.4e-21	4	peroxiredoxin-1-like
LOC121426908	1.51e-24	0.319948	0.943	0.728	2.67e-20	4	insulin-like_growth_factor_2_mRNA-binding_protein_3
LOC121418834	1.82e-24	0.361892	0.723	0.465	3.21e-20	4	uncharacterized_LOC121418834
LOC121408797	4.65e-24	0.263985	0.783	0.49	8.21e-20	4	eukaryotic_translation_initiation_factor_3_subunit_C-like
LOC121409742	5.34e-24	-0.474058	0.989	0.972	9.42e-20	4	uncharacterized_LOC121409742
LOC121420405	5.59e-24	0.257872	0.736	0.445	9.87e-20	4	ATP-dependent_RNA_helicase_cgh-1-like
LOC121431829	2.72e-23	0.290421	0.868	0.569	4.8e-19	4	ras_GTPase-activating_protein-binding_protein_2-like
LOC121415818	6.78e-23	0.326089	0.888	0.607	1.2e-18	4	ATP_synthase_subunit_alpha,_mitochondrial-like
LOC121418990	3.5e-21	0.284367	0.815	0.535	6.17e-17	4	polyadenylate-binding_protein_4-like
LOC121405827	3.88e-20	0.27625	0.615	0.375	6.85e-16	4	G1/S-specific_cyclin-D1-like
LOC121428399	6.61e-20	0.347043	0.634	0.401	1.17e-15	4	actin_CyI,_cytoplasmic
LOC121418797	7.54e-20	0.278011	0.854	0.601	1.33e-15	4	heterogeneous_nuclear_ribonucleoprotein_U-like_protein_1
LOC121428698	4.7e-18	0.27335	0.929	0.725	8.3e-14	4	60S_ribosomal_protein_L7a-like
LOC121427213	8.4e-18	0.250644	0.922	0.715	1.48e-13	4	guanine_nucleotide-binding_protein_subunit_beta
LOC121415695	6.62e-17	0.264117	0.847	0.583	1.17e-12	4	ATP_synthase_subunit_alpha,_mitochondrial-like
LOC121415660	1.34e-16	0.25939	0.923	0.709	2.36e-12	4	activated_RNA_polymerase_II_transcriptional_coactivator_p15-like
LOC121429286	1.43e-16	-0.299116	1	0.998	2.52e-12	4	uncharacterized_LOC121429286
LOC121408814	3.26e-16	0.317206	0.963	0.824	5.76e-12	4	dynein_light_chain_LC6,_flagellar_outer_arm-like
LOC121428930	5.38e-16	-1.15301	0.419	0.471	9.49e-12	4	heme-binding_protein_2-like
LOC121405977	4e-15	-0.371869	0.967	0.926	7.06e-11	4
LOC121406173	5.13e-15	-0.35959	0.861	0.831	9.05e-11	4	uncharacterized_LOC121406173
LOC121419265	6.25e-11	0.275342	0.99	0.944	1.1e-06	4	heat_shock_protein_HSP_90-beta-like
LOC121428736	2.26e-10	-0.984323	0.501	0.505	3.98e-06	4	major_yolk_protein-like
LOC121406953	1.02e-07	-0.421156	0.832	0.722	0.00180259	4
LOC121428219	2.4e-07	-0.317644	0.93	0.837	0.00422609	4	vesicle-associated_membrane_protein_3-like
LOC121422540	1.13e-05	-0.52668	0.696	0.595	0.198833	4	uncharacterized_protein_K02A2.6-like
LOC121426523	0.000118806	-0.449438	0.777	0.625	1	4	pituitary_tumor-transforming_gene_1_protein-interacting_protein-like
LOC121419338	0.000179324	-0.831712	0.338	0.348	1	4	ADP-ribosylation_factor-like
LOC121423799	0.000242643	-0.480668	0.631	0.561	1	4	MAP_kinase-interacting_serine/threonine-protein_kinase_1-like
LOC121408320	0.000365604	-0.263112	0.534	0.372	1	4	NPC_intracellular_cholesterol_transporter_1-like
LOC121419156	0.000490598	-0.635461	0.545	0.482	1	4	cytochrome_P450_3A24-like
LOC121418514	0.000669087	-0.893006	0.983	0.945	1	4	uncharacterized_LOC121418514
LOC121408307	0.000993667	-0.515369	0.624	0.544	1	4	glutamic_acid-rich_protein-like
LOC121419157	0.0015795	-0.552341	0.818	0.69	1	4	cytochrome_P450_3A6-like
LOC121424790	0.00207961	-0.360331	0.348	0.249	1	4	uncharacterized_LOC121424790
LOC121408913	0.00395684	-0.377899	0.703	0.581	1	4	lysosomal_aspartic_protease-like
LOC121411638	0.00476834	-0.304934	0.46	0.333	1	4	LDLR_chaperone_boca-like
LOC121431580	0.00485431	-0.255072	0.541	0.388	1	4	broad_substrate_specificity_ATP-binding_cassette_transporter_ABCG2-like
LOC121428833	0.00522736	-0.564671	0.381	0.285	1	4	heat_shock_70_kDa_protein_IV
LOC121423762	0.00672988	-0.450792	0.798	0.7	1	4	dnaJ_homolog_subfamily_B_member_4-like
LOC121429605	0.00793283	-0.48214	0.568	0.501	1	4	multidrug_resistance-associated_protein_5-like
LOC121408173	0.00819183	-0.619461	0.571	0.494	1	4	nucleoredoxin-like
LOC121424084	0.0194631	-0.265729	0.372	0.28	1	4	uncharacterized_LOC121424084
LOC121410020	0.0214956	-0.309459	0.541	0.396	1	4	S-adenosylmethionine_sensor_upstream_of_mTORC1-like
LOC121426401	0.0216827	-0.320116	0.293	0.224	1	4	rho_GTPase-activating_protein_27-like
LOC121420440	0.0266934	-0.548657	0.496	0.448	1	4	cytochrome_P450_3A8-like
LOC445810	0.0282702	-0.293907	0.293	0.225	1	4	dynamin
LOC121411576	0.0325551	-0.283968	0.411	0.312	1	4	protein_DD3-3-like
LOC121428459	0.0435348	-0.514458	0.719	0.592	1	4	endoplasmic_reticulum_chaperone_BiP-like
LOC121431457	0.0495136	-0.289892	0.679	0.489	1	4	syntaxin-7-like
LOC121411553	0.0624293	-0.256184	0.619	0.456	1	4	uncharacterized_LOC121411553
LOC121410605	0.0641145	-0.356425	0.656	0.561	1	4	ras_association_domain-containing_protein_5-like
LOC121407074	0.0711415	-0.288204	0.264	0.209	1	4	zinc_metalloproteinase_nas-13-like
LOC121428886	0.0724974	-0.480685	0.29	0.285	1	4	metallothionein-A-like
LOC121416464	0.0788057	-0.264209	0.649	0.485	1	4	cytochrome_P450_2C15-like
LOC121411409	0.102057	-0.312268	0.331	0.26	1	4	charged_multivesicular_body_protein_5-like
LOC121430945	0.102847	-0.348371	0.378	0.292	1	4	poly(U)-specific_endoribonuclease-like
LOC121411746	0.108493	-0.303531	0.384	0.305	1	4	sodium-_and_chloride-dependent_GABA_transporter_1-like
LOC121411571	0.11539	-0.270502	0.443	0.35	1	4	synaptophysin-like
LOC121430638	0.120811	-0.451431	0.476	0.422	1	4	monocarboxylate_transporter_2-like
LOC121423991	0.145862	-0.275005	0.536	0.412	1	4	next_to_BRCA1_gene_1_protein-like
LOC121429485	0.160738	-0.303387	0.277	0.225	1	4	choline-phosphate_cytidylyltransferase_A-like
LOC121418011	0.165659	-0.269243	0.264	0.215	1	4	organic_solute_transporter_subunit_alpha-like
LOC121405859	0.172635	-0.688647	0.513	0.432	1	4	uncharacterized_LOC121405859
LOC121408211	0.173747	-0.338281	0.483	0.373	1	4	small_integral_membrane_protein_14-like
LOC121421314	0.197663	-0.293365	0.47	0.371	1	4	fatty_acyl-CoA_reductase_1-like
LOC121408340	0.198021	-0.255315	0.82	0.699	1	4	CCAAT/enhancer-binding_protein_alpha-like
LOC121429020	0.226196	-0.420454	0.607	0.487	1	4	probable_maltase
LOC121420439	0.233636	-0.359104	0.354	0.282	1	4	cytochrome_P450_3A4-like
LOC121415925	0.250605	-0.370015	0.426	0.337	1	4	uncharacterized_LOC121415925
LOC121409252	0.261126	-0.289824	0.25	0.207	1	4	solute_carrier_family_13_member_5-like
LOC121409705	0.262234	-0.323916	0.355	0.286	1	4	peptide_methionine_sulfoxide_reductase-like
LOC121425027	0.302145	-0.440577	0.28	0.23	1	4	F-box/LRR-repeat_protein_2-like
LOC121427162	0.323047	-0.361752	0.46	0.41	1	4	chymotrypsin_B-like
LOC121423422	0.335811	-0.371281	0.491	0.424	1	4	aldehyde_dehydrogenase,_mitochondrial-like
LOC121415315	0.393101	-0.320011	0.445	0.358	1	4	cyclic_AMP-responsive_element-binding_protein_3-like_protein_4
LOC121418929	0.412745	-0.469759	0.295	0.268	1	4	circularly_permutated_Ras_protein_1-like
LOC121431604	0.429443	-0.31295	0.653	0.544	1	4	steroid_17-alpha-hydroxylase/17,20_lyase-like
LOC121415619	0.431076	0.592056	0.371	0.315	1	4	ZP_domain-containing_protein-like
LOC121415035	0.454186	-0.328837	0.626	0.48	1	4	rho_guanine_nucleotide_exchange_factor_18-like
LOC121410441	0.601502	-0.353672	0.344	0.289	1	4	metalloproteinase_inhibitor_3-like
LOC121418551	0.604083	-0.320005	0.595	0.494	1	4	SPARC-related_modular_calcium-binding_protein_1-like
LOC121415891	0.627225	-0.295128	0.384	0.321	1	4	sodium-dependent_phosphate_transporter_2-like
LOC121430760	0.731194	-0.293124	0.497	0.426	1	4	actin_CyI,_cytoplasmic-like
LOC121415203	0.766689	-0.363107	0.582	0.472	1	4	E3_ubiquitin-protein_ligase_arih1-like
LOC121422734	0.9247	-0.524315	0.338	0.29	1	4	uncharacterized_LOC121422734
LOC121430557	0.947523	-0.401682	0.463	0.375	1	4	nucleolin_1-like
LOC121413372	0.979604	-0.294217	0.281	0.254	1	4	uncharacterized_LOC121413372
LOC121407069	2.94e-88	0.603683	1	1	5.19e-84	5	fibropellin-3-like
LOC121427769	7.3e-73	-0.74014	0.993	0.997	1.29e-68	5	ATP-dependent_translocase_ABCB1-like
LOC121426907	3.44e-68	0.71884	0.617	0.266	6.06e-64	5	methylsterol_monooxygenase_1-like
LOC121418656	4.73e-62	0.503664	1	1	8.35e-58	5	fatty_acid-binding_protein_type_3-like
LOC121425603	5.78e-60	0.833255	1	0.954	1.02e-55	5	periostin-like
LOC121429138	4.58e-56	0.80739	0.938	0.718	8.08e-52	5	glutamine_synthetase-like
LOC121410596	7.23e-55	0.55374	0.443	0.167	1.28e-50	5	macrophage_mannose_receptor_1-like
LOC121405901	7.65e-55	0.638295	0.721	0.377	1.35e-50	5	retinol_dehydrogenase_8-like
LOC121407613	1.17e-54	0.670264	0.779	0.435	2.06e-50	5	dehydrogenase/reductase_SDR_family_member_1-like
LOC121408955	1.43e-51	0.574051	0.617	0.296	2.53e-47	5	tricarboxylate_transport_protein_B,_mitochondrial-like
LOC121421104	2.2e-50	0.552121	0.943	0.729	3.88e-46	5	NADH-cytochrome_b5_reductase_3-like
LOC121426318	2.15e-49	0.596736	0.791	0.446	3.8e-45	5	angiotensin-converting_enzyme-like
LOC121431716	3.07e-48	0.444202	0.995	0.916	5.41e-44	5	peptidyl-prolyl_cis-trans_isomerase
LOC121425282	4.97e-48	0.50825	0.657	0.338	8.77e-44	5	aldo-keto_reductase_family_1_member_B1-like
LOC121424952	9.47e-48	0.479566	0.564	0.267	1.67e-43	5	2,3-bisphosphoglycerate-independent_phosphoglycerate_mutase-like
LOC121417317	3.22e-45	0.53274	0.583	0.285	5.67e-41	5	putative_defense_protein_1
LOC121430760	1.55e-44	-1.87177	0.206	0.453	2.74e-40	5	actin_CyI,_cytoplasmic-like
LOC121406173	1.63e-43	0.928124	0.944	0.824	2.88e-39	5	uncharacterized_LOC121406173
LOC121431052	2.35e-42	0.333273	1	0.994	4.15e-38	5	annexin_A13-like
LOC121424351	1.8e-41	0.533624	0.799	0.483	3.18e-37	5	uncharacterized_LOC121424351
LOC121414586	2.38e-41	0.393032	0.25	0.079	4.19e-37	5	sodium/glucose_cotransporter_4-like
LOC121422798	6.02e-40	0.595064	0.669	0.377	1.06e-35	5	uncharacterized_LOC121422798
LOC121428663	8.84e-40	0.438711	0.546	0.269	1.56e-35	5	kynurenine--oxoglutarate_transaminase_3-like
LOC121429193	1.01e-39	0.397759	0.66	0.352	1.79e-35	5	high_affinity_copper_uptake_protein_1-like
LOC446192	3.16e-39	0.500055	0.998	0.979	5.57e-35	5	extracellular_matrix_protein_18
LOC121412198	5.38e-39	0.465316	0.595	0.312	9.49e-35	5	sulfotransferase_4A1-like
LOC121411391	6.33e-39	0.387424	0.622	0.318	1.12e-34	5	epoxide_hydrolase_3-like
LOC121418559	8.79e-39	0.5072	0.657	0.364	1.55e-34	5	methylmalonate-semialdehyde_dehydrogenase_[acylating],_mitochondrial-like
LOC121418034	1.3e-38	0.661418	0.807	0.51	2.29e-34	5	cellular_retinoic_acid-binding_protein_2-like
LOC121431839	2.67e-38	0.412576	0.551	0.273	4.72e-34	5	glutathione_S-transferase_1-like
LOC121431111	3.8e-38	0.350379	0.355	0.143	6.71e-34	5	xylose_isomerase-like
LOC121418306	4.47e-37	0.400148	0.438	0.202	7.89e-33	5	N-acetylated-alpha-linked_acidic_dipeptidase_2-like
LOC121415891	4.86e-37	0.519133	0.588	0.304	8.57e-33	5	sodium-dependent_phosphate_transporter_2-like
LOC121416026	9.49e-37	0.3667	0.488	0.233	1.67e-32	5	cathepsin_B-like
LOC121423558	1.73e-36	0.653793	0.402	0.178	3.06e-32	5	uncharacterized_LOC121423558
LOC121427624	9.83e-36	0.516589	0.98	0.867	1.73e-31	5	development-specific_protein_LVN1.2-like
LOC121430945	7e-35	0.400502	0.542	0.279	1.23e-30	5	poly(U)-specific_endoribonuclease-like
LOC121409742	7.94e-35	0.814282	0.997	0.971	1.4e-30	5	uncharacterized_LOC121409742
LOC121416623	1.01e-34	0.355278	0.302	0.118	1.79e-30	5	ceramide-1-phosphate_transfer_protein-like
LOC121424835	1.02e-34	0.265234	0.41	0.181	1.8e-30	5	Y+L_amino_acid_transporter_2-like
LOC121426101	1.75e-34	0.296917	0.338	0.14	3.08e-30	5	all-trans-retinol_13,14-reductase-like
LOC121423735	4.3e-34	0.346716	0.402	0.181	7.59e-30	5	excitatory_amino_acid_transporter_3-like
LOC121425418	5.65e-34	0.437193	0.586	0.325	9.97e-30	5	V-type_proton_ATPase_subunit_e_2-like
LOC121428033	7.24e-34	0.4086	0.527	0.274	1.28e-29	5	alkaline_phosphatase-like
LOC121426927	1.16e-33	0.378958	0.405	0.183	2.05e-29	5	sushi,_von_Willebrand_factor_type_A,_EGF_and_pentraxin_domain-containing_protein_1-like
LOC121422794	3.8e-33	0.426229	0.475	0.239	6.7e-29	5	adipocyte_plasma_membrane-associated_protein-like
LOC121427451	4.85e-33	0.287948	0.434	0.205	8.55e-29	5	succinate_dehydrogenase_[ubiquinone]_iron-sulfur_subunit,_mitochondrial-like
LOC121407516	8.42e-33	0.382746	0.667	0.387	1.49e-28	5	coiled-coil_domain-containing_protein_134-like
LOC121418502	1.02e-32	0.513004	0.524	0.275	1.79e-28	5	calmodulin
LOC121427466	1.45e-32	0.418588	0.946	0.726	2.55e-28	5	glyceraldehyde-3-phosphate_dehydrogenase-like
LOC121419249	1.8e-32	0.289347	0.377	0.169	3.17e-28	5	malate_dehydrogenase,_cytoplasmic-like
LOC121429020	5.32e-32	0.442364	0.755	0.476	9.39e-28	5	probable_maltase
LOC121429286	2.01e-31	0.622805	1	0.999	3.55e-27	5	uncharacterized_LOC121429286
LOC121421629	3.19e-31	0.489772	0.753	0.467	5.64e-27	5	gamma-butyrobetaine_dioxygenase-like
LOC121407815	3.2e-31	0.311181	0.345	0.151	5.65e-27	5	dehydrogenase/reductase_SDR_family_member_1-like
LOC121407248	3.67e-31	0.4589	0.637	0.374	6.48e-27	5	dipeptidase_1-like
LOC121408817	6.27e-31	0.291195	0.459	0.228	1.11e-26	5	macrophage_migration_inhibitory_factor-like
LOC121408340	9.43e-31	-0.947693	0.711	0.711	1.66e-26	5	CCAAT/enhancer-binding_protein_alpha-like
LOC121425067	1.4e-30	0.251663	0.26	0.099	2.47e-26	5	aqualysin-1-like
LOC121418763	4.17e-30	0.33525	0.608	0.338	7.36e-26	5
LOC121408639	7.52e-30	0.327827	0.385	0.182	1.33e-25	5	scoloptoxin_SSD14-like
LOC121431432	8.3e-30	0.421316	0.272	0.108	1.46e-25	5	regucalcin-like
LOC121410788	1.22e-29	0.317703	0.502	0.259	2.16e-25	5	uncharacterized_LOC121410788
LOC121421364	1.53e-29	0.252808	0.333	0.145	2.71e-25	5	gamma-butyrobetaine_dioxygenase-like
LOC121411241	1.61e-29	0.423572	0.628	0.365	2.85e-25	5	phosphoserine_aminotransferase-like
LOC121411240	1.72e-29	0.353219	0.515	0.276	3.04e-25	5	pyruvate_kinase_PKM-like
LOC121407392	1.92e-29	0.379877	0.909	0.652	3.39e-25	5	subtilisin-chymotrypsin_inhibitor-2B-like
LOC121418389	3.3e-29	0.361334	0.593	0.326	5.82e-25	5	acyl-CoA_6-desaturase-like
LOC121423915	3.52e-29	0.309882	0.454	0.231	6.21e-25	5	very-long-chain_enoyl-CoA_reductase-like
LOC121408813	4.6e-29	0.448538	0.36	0.167	8.11e-25	5	dynein_light_chain_2,_cytoplasmic-like
LOC121431079	9.96e-29	0.262827	0.269	0.108	1.76e-24	5	venom_phosphodiesterase_2-like
LOC121406143	1.1e-28	0.300795	0.407	0.198	1.94e-24	5	uncharacterized_LOC121406143
LOC121418813	1.13e-28	0.359586	0.98	0.865	1.99e-24	5	galectin-8-like
LOC121411913	2.27e-28	0.287066	0.343	0.154	4.01e-24	5	bifunctional_D-cysteine_desulfhydrase/1-aminocyclopropane-1-carboxylate_deaminase,_mitochondrial-like
LOC121423763	2.45e-28	0.414277	0.812	0.532	4.31e-24	5	sterol_carrier_protein_2-like
LOC121418634	2.71e-28	0.293679	0.481	0.249	4.78e-24	5	neutral_and_basic_amino_acid_transport_protein_rBAT-like
LOC121425039	4.02e-28	0.378165	0.586	0.336	7.09e-24	5	aqualysin-1-like
LOC121423602	5.05e-28	0.414801	0.605	0.349	8.91e-24	5	hydroxymethylglutaryl-CoA_synthase_1-like
LOC121413808	5.57e-28	0.319961	0.623	0.355	9.83e-24	5	xaa-Pro_aminopeptidase_1-like
LOC121423707	6.5e-28	0.284596	0.255	0.102	1.15e-23	5	spermatogenesis-associated_protein_1-like
LOC121430396	7.77e-28	0.301895	0.478	0.251	1.37e-23	5	phospholipid_scramblase_2-like
LOC121424915	9.68e-28	0.296701	0.519	0.278	1.71e-23	5	aqualysin-1-like
LOC121429660	1.08e-27	0.257478	0.483	0.248	1.9e-23	5	uncharacterized_LOC121429660
LOC121431580	2.64e-27	0.337012	0.649	0.381	4.66e-23	5	broad_substrate_specificity_ATP-binding_cassette_transporter_ABCG2-like
LOC121431622	3.33e-27	-1.33373	0.243	0.415	5.88e-23	5	uncharacterized_LOC121431622
LOC121410000	3.84e-27	0.32549	0.36	0.17	6.78e-23	5	protein_ATP6V1FNB-like
LOC121428937	4.74e-27	-0.305193	1	0.993	8.36e-23	5	60S_ribosomal_protein_L5-like
LOC121419318	5.85e-27	0.26419	0.48	0.252	1.03e-22	5	hepatocyte_nuclear_factor_3-beta-like
LOC121418514	6.12e-27	-1.32455	0.971	0.947	1.08e-22	5	uncharacterized_LOC121418514
LOC121423729	9.82e-27	0.294817	0.562	0.315	1.73e-22	5	muscle-specific_protein_20-like
LOC121415203	1.47e-26	-1.34394	0.372	0.493	2.59e-22	5	E3_ubiquitin-protein_ligase_arih1-like
LOC121423320	2.45e-26	0.324857	0.677	0.406	4.33e-22	5	rho_GDP-dissociation_inhibitor_1-like
LOC121416923	5.3e-26	0.347917	0.703	0.433	9.35e-22	5	profilin-like
LOC121426187	6.35e-26	-1.29111	0.334	0.476	1.12e-21	5	uncharacterized_LOC121426187
LOC121422901	7.32e-26	0.260342	0.412	0.208	1.29e-21	5	uncharacterized_LOC121422901
LOC121431887	1.01e-25	0.405518	0.883	0.629	1.79e-21	5	S-crystallin_SL11-like
LOC121413906	1.03e-25	0.291105	0.285	0.125	1.82e-21	5	organic_cation_transporter_protein-like
LOC121422725	3.23e-25	0.285573	0.277	0.12	5.7e-21	5	cytoglobin-1-like
LOC121416579	4.02e-25	0.259587	0.331	0.157	7.08e-21	5	putative_defense_protein_1
LOC121408978	7.73e-25	0.312492	0.422	0.225	1.36e-20	5	protein_unc-119_homolog_B-like
LOC121424959	2.27e-24	0.272773	0.689	0.419	4e-20	5	aspartate_aminotransferase,_cytoplasmic-like
LOC121412352	2.73e-24	0.3303	0.419	0.224	4.82e-20	5	cyclin-I-like
LOC121411282	3.38e-24	0.386874	0.807	0.557	5.96e-20	5	aminopeptidase_N-like
LOC121412000	5e-24	0.258992	0.377	0.192	8.83e-20	5	calcium/calmodulin-dependent_protein_kinase_type_1D-like
LOC121410441	6.21e-24	0.348003	0.5	0.276	1.1e-19	5	metalloproteinase_inhibitor_3-like
LOC121405859	7.52e-24	-1.21517	0.297	0.453	1.33e-19	5	uncharacterized_LOC121405859
LOC121406953	1.02e-23	-0.688646	0.775	0.729	1.8e-19	5
LOC121411075	3.52e-23	0.315978	0.657	0.407	6.22e-19	5	mitochondrial_10-formyltetrahydrofolate_dehydrogenase-like
LOC121429643	3.65e-23	0.273354	0.617	0.375	6.44e-19	5	mannose-P-dolichol_utilization_defect_1_protein-like
LOC121423851	3.92e-23	0.484246	0.997	0.982	6.92e-19	5	uncharacterized_LOC121423851
LOC121430536	7.26e-23	0.383395	0.704	0.466	1.28e-18	5	myosin_regulatory_light_chain_2,_smooth_muscle_minor_isoform-like
LOC121410256	9.13e-23	-1.19202	0.243	0.394	1.61e-18	5	rho-related_protein_racA-like
LOC121423422	1.02e-22	0.403674	0.657	0.411	1.8e-18	5	aldehyde_dehydrogenase,_mitochondrial-like
LOC121426152	1.5e-22	0.344578	0.75	0.504	2.65e-18	5	acyl-CoA-binding_protein-like
LOC121408679	1.61e-22	0.273718	0.304	0.145	2.83e-18	5	sodium/glucose_cotransporter_4-like
LOC121419265	2.5e-22	-0.401723	0.97	0.947	4.41e-18	5	heat_shock_protein_HSP_90-beta-like
LOC121422410	3.29e-22	0.354814	0.865	0.63	5.8e-18	5	actin-related_protein_2/3_complex_subunit_1A-like
LOC121423262	3.34e-22	-1.07716	0.15	0.317	5.9e-18	5	chromobox_protein_homolog_8-like
LOC121429735	4.13e-22	0.27842	0.449	0.252	7.29e-18	5	14-3-3_protein_zeta/delta-like
LOC121415161	6.6e-22	0.304706	0.98	0.872	1.16e-17	5	receptor_expression-enhancing_protein_5-like
LOC121418033	8.79e-22	0.292881	0.696	0.444	1.55e-17	5	cellular_retinoic_acid-binding_protein_1-like
LOC121409167	8.86e-22	0.269068	0.708	0.443	1.56e-17	5	uncharacterized_LOC121409167
LOC121418368	1.5e-21	0.275792	0.49	0.283	2.66e-17	5	cilia-_and_flagella-associated_protein_36-like
LOC121423966	2.47e-21	0.379381	0.253	0.115	4.37e-17	5	phospholipase_A2-like
LOC121406050	2.81e-21	0.267998	0.606	0.378	4.95e-17	5	uncharacterized_LOC121406050
LOC121410379	2.98e-21	0.382945	0.596	0.365	5.25e-17	5	cubilin-like
LOC121424084	2.99e-21	0.255055	0.483	0.272	5.27e-17	5	uncharacterized_LOC121424084
LOC121407706	3.33e-21	0.288045	0.645	0.401	5.88e-17	5	membrane-associated_progesterone_receptor_component_1-like
LOC121421443	4.52e-21	0.254719	0.473	0.272	7.97e-17	5	NADH_dehydrogenase_[ubiquinone]_1_alpha_subcomplex_subunit_9,_mitochondrial-like
LOC121417127	6.97e-21	0.272922	0.633	0.395	1.23e-16	5	NADH_dehydrogenase_[ubiquinone]_1_alpha_subcomplex_subunit_11-like
LOC121419382	1.35e-20	0.322818	0.62	0.392	2.39e-16	5	delta(14)-sterol_reductase_TM7SF2-like
LOC121429604	2.15e-20	0.26937	0.615	0.376	3.8e-16	5	mid1-interacting_protein_1A-like
LOC121407003	3.07e-20	0.265941	0.603	0.376	5.41e-16	5	amine_oxidase_[flavin-containing]_B-like
LOC121422772	3.27e-20	0.312877	0.941	0.781	5.78e-16	5	outer_membrane_lipoprotein_Blc-like
LOC121408913	3.41e-20	0.34006	0.821	0.573	6.02e-16	5	lysosomal_aspartic_protease-like
LOC121432073	3.51e-20	0.373409	0.821	0.574	6.2e-16	5	acyl-CoA_6-desaturase-like
LOC121429599	4.23e-20	0.349228	0.689	0.463	7.46e-16	5	mid1-interacting_protein_1A-like
LOC121407165	4.49e-20	0.258039	0.514	0.302	7.91e-16	5	dipeptidase_1-like
LOC121423325	4.9e-20	0.371919	0.87	0.645	8.65e-16	5	uncharacterized_LOC121423325
LOC121428377	9.73e-20	0.274964	0.802	0.539	1.72e-15	5	actin-related_protein_2/3_complex_subunit_5-A-like
LOC121411605	2.21e-19	0.263704	0.6	0.377	3.89e-15	5	myosin-2_essential_light_chain-like
LOC121429222	1.02e-18	0.786176	0.978	0.933	1.8e-14	5	uncharacterized_LOC121429222
LOC121418189	6.94e-18	0.256623	0.77	0.507	1.22e-13	5	peroxiredoxin-5,_mitochondrial-like
LOC121430636	7.42e-18	0.279734	0.851	0.623	1.31e-13	5	lysosomal-associated_transmembrane_protein_4A-like
LOC121422269	9.18e-18	0.261505	0.743	0.504	1.62e-13	5	protein_disulfide-isomerase-like
LOC121419865	1.28e-17	0.319856	0.855	0.611	2.26e-13	5	acyl-CoA_6-desaturase-like
LOC121420380	1.63e-17	-0.731604	0.439	0.527	2.87e-13	5	protein_BTG3-like
LOC121412398	3.12e-17	0.270312	0.5	0.306	5.51e-13	5	serine/threonine-protein_phosphatase_6_regulatory_ankyrin_repeat_subunit_C-like
LOC121411860	5.62e-17	0.302331	0.861	0.663	9.92e-13	5	caveolin-3-like
LOC121415315	7.02e-17	-0.887927	0.247	0.377	1.24e-12	5	cyclic_AMP-responsive_element-binding_protein_3-like_protein_4
LOC121425929	8.53e-17	0.287827	0.907	0.7	1.5e-12	5	ADP-ribosylation_factor_1-like
LOC121432020	1.25e-16	0.275472	0.66	0.44	2.21e-12	5	S-adenosylmethionine_synthase-like
LOC121406364	3.85e-16	-0.861874	0.294	0.409	6.78e-12	5	uncharacterized_LOC121406364
LOC121430708	1.04e-15	0.288384	0.26	0.135	1.84e-11	5	tektin-B1-like
LOC121428399	1.18e-15	-0.977345	0.334	0.431	2.08e-11	5	actin_CyI,_cytoplasmic
LOC121408055	1.46e-15	-0.685004	0.16	0.299	2.57e-11	5	core-binding_factor_subunit_beta-like
LOC121416295	2.41e-15	0.298998	0.777	0.546	4.26e-11	5	betaine--homocysteine_S-methyltransferase_1-like
LOC121424761	2.85e-15	0.312459	0.828	0.601	5.03e-11	5	uncharacterized_protein_ZK1073.1-like
LOC121418011	3.63e-15	0.348544	0.353	0.208	6.41e-11	5	organic_solute_transporter_subunit_alpha-like
LOC121415190	4.98e-15	-0.745516	0.549	0.577	8.8e-11	5	bcl-2-like_protein_2
LOC121429030	7.51e-15	-0.762178	0.652	0.616	1.32e-10	5	immediate_early_response_gene_5-like_protein
LOC121432239	2.21e-14	0.785626	1	0.995	3.9e-10	5	fatty_acid-binding_protein_Fh15-like
LOC121427376	6.65e-14	0.256762	0.792	0.562	1.17e-09	5	enolase-like
LOC121423030	1.27e-13	0.252987	0.953	0.755	2.24e-09	5	ATP_synthase_subunit_d,_mitochondrial-like
LOC121415634	2.05e-13	-0.778071	0.149	0.271	3.61e-09	5	glutamate_receptor_3-like
LOC121413371	8.8e-13	0.371728	0.279	0.159	1.55e-08	5	uncharacterized_LOC121413371
LOC121407996	1.14e-12	-0.406614	0.865	0.799	2.01e-08	5	eukaryotic_translation_initiation_factor_2_subunit_2-like
LOC121406318	1.16e-12	-0.885758	0.216	0.324	2.05e-08	5	trichohyalin-like
LOC121423022	2.56e-12	-0.824566	0.299	0.387	4.52e-08	5	mitogen-activated_protein_kinase_kinase_kinase_13-like
LOC121426068	3.12e-12	-0.610245	0.135	0.254	5.51e-08	5	ATP-dependent_translocase_ABCB1-like
LOC121418762	8.71e-12	-0.742138	0.552	0.57	1.54e-07	5	fos-related_antigen_1-like
LOC121431731	2.12e-11	0.278623	0.831	0.646	3.74e-07	5	stearoyl-CoA_desaturase_5-like
LOC121418862	5.38e-11	-0.475745	0.649	0.637	9.5e-07	5	heat_shock_protein_Hsp-16.48/Hsp-16.49-like
LOC121423762	5.63e-11	-0.672659	0.736	0.707	9.93e-07	5	dnaJ_homolog_subfamily_B_member_4-like
LOC121415060	6.37e-11	-0.726989	0.174	0.277	1.12e-06	5	uncharacterized_LOC121415060
LOC121411346	1.07e-10	-0.601953	0.405	0.472	1.89e-06	5	uncharacterized_LOC121411346
LOC121425403	1.36e-10	0.277069	0.885	0.696	2.4e-06	5	hexokinase-2-like
LOC121431891	1.41e-10	-0.889529	0.213	0.312	2.49e-06	5	uncharacterized_LOC121431891
LOC121418929	4.78e-10	-0.659613	0.176	0.279	8.43e-06	5	circularly_permutated_Ras_protein_1-like
LOC121423143	6.03e-10	-0.848658	0.262	0.34	1.06e-05	5	fascin-like
LOC121410605	1.52e-09	-0.511504	0.544	0.573	2.68e-05	5	ras_association_domain-containing_protein_5-like
LOC121423799	1.88e-09	-0.63314	0.578	0.567	3.32e-05	5	MAP_kinase-interacting_serine/threonine-protein_kinase_1-like
LOC121422407	3.45e-09	-0.391188	0.932	0.884	6.08e-05	5	histone_H1-delta-like
LOC121419157	4.12e-09	-0.512214	0.731	0.7	7.26e-05	5	cytochrome_P450_3A6-like
LOC121414288	9.07e-09	-0.264176	0.968	0.909	0.000160066	5	tubulin_alpha-1A_chain-like
LOC121412919	1.01e-08	-0.605782	0.181	0.272	0.000178566	5	protein_Shroom2-like
LOC121409315	1.19e-08	-0.606005	0.167	0.257	0.000210101	5	BTB/POZ_domain-containing_adapter_for_CUL3-mediated_RhoA_degradation_protein_3-like
LOC121423647	1.23e-08	-0.651028	0.404	0.455	0.000217867	5	transcription_factor_AP-1-like
LOC121421362	3e-08	-0.622704	0.209	0.292	0.000529959	5	uncharacterized_LOC121421362
LOC121405827	5.26e-08	-0.636428	0.348	0.403	0.00092887	5	G1/S-specific_cyclin-D1-like
LOC121410666	7.43e-08	-0.48894	0.762	0.652	0.00131117	5	protein_BTG1-like
LOC121420440	7.87e-08	-0.573847	0.399	0.458	0.00138906	5	cytochrome_P450_3A8-like
LOC121405875	9.52e-08	-0.646745	0.188	0.27	0.00167921	5	F-actin-monooxygenase_MICAL3-like
LOC121428930	1.32e-07	0.529009	0.596	0.454	0.00232414	5	heme-binding_protein_2-like
LOC121415989	1.42e-07	-0.619493	0.279	0.348	0.00249669	5	transcription_factor_HIVEP3-like
LOC121428886	2.31e-07	0.531912	0.394	0.275	0.00407958	5	metallothionein-A-like
LOC121422734	2.77e-07	-0.688421	0.225	0.301	0.00488476	5	uncharacterized_LOC121422734
LOC121408797	4.12e-07	-0.525853	0.52	0.518	0.00726531	5	eukaryotic_translation_initiation_factor_3_subunit_C-like
LOC121418797	4.84e-07	-0.482599	0.696	0.619	0.0085418	5	heterogeneous_nuclear_ribonucleoprotein_U-like_protein_1
LOC121423991	4.9e-07	-0.598019	0.385	0.428	0.00864756	5	next_to_BRCA1_gene_1_protein-like
LOC121410833	1.13e-06	-0.542748	0.209	0.286	0.0198807	5	KAT8_regulatory_NSL_complex_subunit_1-like
LOC121415546	1.29e-06	-0.580436	0.392	0.425	0.0227571	5	asparagine--tRNA_ligase,_cytoplasmic-like
LOC121427437	2.02e-06	-0.587053	0.348	0.389	0.0355749	5	ATPase_family_AAA_domain-containing_protein_3-B-like
LOC121411918	2.23e-06	-0.612796	0.257	0.318	0.0393555	5	protein_diaphanous_homolog_2-like
LOC121428518	2.52e-06	-0.502548	0.448	0.467	0.0444174	5	far_upstream_element-binding_protein_1-like
LOC121408202	4.97e-06	-0.612252	0.262	0.319	0.0876629	5	A-kinase_anchor_protein_1,_mitochondrial-like
LOC121409246	4.99e-06	-0.496317	0.206	0.275	0.0880386	5	transcription_intermediary_factor_1-alpha-like
LOC121431800	6.28e-06	-0.332666	0.792	0.685	0.110716	5	histone_H2A.V
LOC121428736	7.34e-06	0.599537	0.625	0.494	0.129479	5	major_yolk_protein-like
LOC121431291	2.06e-05	-0.571426	0.301	0.344	0.363043	5	iroquois-class_homeodomain_protein_irx-3-like
LOC121412046	2.3e-05	-0.534976	0.324	0.362	0.405716	5	uncharacterized_LOC121412046
LOC121414301	6.06e-05	-0.465633	0.231	0.287	1	5	uncharacterized_LOC121414301
LOC121411767	0.000108468	-0.517579	0.328	0.365	1	5	uncharacterized_LOC121411767
LOC121426747	0.000163937	-0.50505	0.209	0.26	1	5	uncharacterized_LOC121426747
LOC121422686	0.000167451	-0.465979	0.206	0.258	1	5	E3_ubiquitin-protein_ligase_CHIP-like
LOC121428833	0.000191127	-0.888043	0.25	0.298	1	5	heat_shock_70_kDa_protein_IV
LOC121415038	0.000200316	-0.437593	0.231	0.281	1	5	mitochondrial_import_inner_membrane_translocase_subunit_TIM44-like
LOC121422456	0.000215975	0.592507	0.983	0.958	1	5	uncharacterized_LOC121422456
LOC121405946	0.000250716	-0.489931	0.385	0.402	1	5	tyrosine_3-monooxygenase-like
LOC121411122	0.00026499	-0.47966	0.373	0.398	1	5	heat_shock_cognate_71_kDa_protein-like
LOC121411556	0.000292029	-0.552991	0.383	0.397	1	5	thyrotroph_embryonic_factor-like
LOC121414351	0.000310818	-0.465873	0.264	0.306	1	5	leucine--tRNA_ligase,_cytoplasmic-like
LOC121423744	0.000319917	-0.449433	0.216	0.263	1	5	Krueppel-like_factor_5
LOC121427648	0.000330414	-0.529392	0.527	0.49	1	5	nucleolin-like
LOC121410003	0.000524117	-0.46719	0.372	0.384	1	5	glutamine--tRNA_ligase-like
LOC121422281	0.000627335	-0.430944	0.627	0.563	1	5	ATP-dependent_RNA_helicase_dbp2-like
LOC121429715	0.000767227	-0.501458	0.216	0.258	1	5	multidrug_resistance-associated_protein_5-like
LOC121415663	0.000825909	-0.532662	0.223	0.265	1	5	apoptotic_chromatin_condensation_inducer_in_the_nucleus-like
LOC121431114	0.001036	-0.509849	0.392	0.395	1	5	elongation_factor_1-alpha_2-like
LOC121424678	0.00135582	-0.458855	0.544	0.502	1	5	mitotic_apparatus_protein_p62-like
LOC121413578	0.00146236	-0.737806	0.235	0.274	1	5	uncharacterized_LOC121413578
LOC121428363	0.00189009	-0.438936	0.299	0.324	1	5	valine--tRNA_ligase-like
LOC121422974	0.00198172	-0.421772	0.439	0.434	1	5	eukaryotic_peptide_chain_release_factor_GTP-binding_subunit_ERF3A-like
LOC121425192	0.00198401	-0.359276	0.287	0.209	1	5	extracellular_serine_proteinase-like
LOC121410604	0.00239391	-0.376041	0.549	0.507	1	5	serine--tRNA_ligase,_cytoplasmic-like
LOC121409138	0.00240887	-0.4515	0.431	0.429	1	5	ran-specific_GTPase-activating_protein-like
LOC121411899	0.00253837	-0.493319	0.228	0.26	1	5	ankyrin_repeat_domain-containing_protein_27-like
LOC121415224	0.00297884	-0.478663	0.476	0.455	1	5	non-lysosomal_glucosylceramidase-like
LOC121415925	0.00312562	-0.488459	0.326	0.347	1	5	uncharacterized_LOC121415925
LOC121417436	0.00370284	-0.321413	0.676	0.587	1	5	proliferation-associated_protein_2G4-like
LOC121419338	0.00400925	-0.611967	0.336	0.348	1	5	ADP-ribosylation_factor-like
LOC121414262	0.00405727	-0.464489	0.255	0.285	1	5	uncharacterized_LOC121414262
LOC121425645	0.00432999	-0.437403	0.544	0.488	1	5	lupus_La_protein_homolog
LOC121420333	0.00444445	-0.482719	0.319	0.339	1	5	uncharacterized_LOC121420333
LOC121428217	0.00510673	-0.346319	0.684	0.577	1	5	nucleolin-like
LOC121411576	0.00641698	-0.443018	0.299	0.324	1	5	protein_DD3-3-like
LOC121411494	0.007584	-0.441087	0.483	0.441	1	5	AN1-type_zinc_finger_protein_5-like
LOC121415221	0.00765713	-0.448111	0.434	0.412	1	5	eukaryotic_translation_initiation_factor_3_subunit_J-like
LOC121424125	0.00781027	-0.349531	0.225	0.261	1	5	protein_Wnt-6-like
LOC121420405	0.0082976	-0.347945	0.505	0.47	1	5	ATP-dependent_RNA_helicase_cgh-1-like
LOC121411553	0.00920205	-0.361914	0.48	0.471	1	5	uncharacterized_LOC121411553
LOC100134945	0.00925248	-0.292066	0.693	0.61	1	5	mortalin
LOC121426430	0.00988418	-0.395031	0.269	0.294	1	5	trichohyalin-like
LOC121411410	0.0111875	-0.470573	0.5	0.457	1	5	acidic_leucine-rich_nuclear_phosphoprotein_32_family_member_B-like
LOC121422718	0.0113552	-0.263635	0.669	0.607	1	5	cyclic_AMP-dependent_transcription_factor_ATF-4-like
LOC121406698	0.0133165	-0.368105	0.221	0.25	1	5	la-related_protein_1-like
LOC121408173	0.013598	-0.535793	0.551	0.497	1	5	nucleoredoxin-like
LOC121415856	0.0160341	-0.330511	0.247	0.277	1	5	28S_ribosomal_protein_S29,_mitochondrial-like
LOC121415350	0.0290664	-0.370817	0.231	0.255	1	5	dnaJ_homolog_subfamily_C_member_21-like
LOC121417224	0.0306956	-0.346215	0.669	0.548	1	5	pumilio_homolog_2-like
LOC121431565	0.0333256	-0.337309	0.233	0.256	1	5	nucleolar_protein_dao-5-like
LOC121427162	0.0360234	0.254569	0.471	0.41	1	5	chymotrypsin_B-like
LOC121423694	0.0394649	-0.360519	0.267	0.281	1	5	transcription_factor_BTF3_homolog_4-like
LOC121411571	0.0455467	-0.467697	0.367	0.358	1	5	synaptophysin-like
LOC121430679	0.0498557	-0.356993	0.355	0.351	1	5	eukaryotic_translation_initiation_factor_2_subunit_1-like
LOC121411826	0.0505795	-0.345996	0.448	0.422	1	5	mitochondrial_import_inner_membrane_translocase_subunit_Tim16-like
LOC121426629	0.0531915	-0.326834	0.416	0.401	1	5	hydroxyacid_oxidase_1-like
LOC121408325	0.0539758	-0.272434	0.688	0.579	1	5	charged_multivesicular_body_protein_4b-like
LOC121431423	0.056008	-0.386584	0.541	0.492	1	5	syntenin-1-like
LOC121430228	0.0586616	-0.327656	0.252	0.27	1	5	cullin-3-like
LOC121427508	0.0622123	0.382708	0.993	0.989	1	5	uncharacterized_LOC121427508
LOC121411534	0.0624215	-0.378878	0.551	0.486	1	5	eukaryotic_translation_initiation_factor_5B-like
LOC121410019	0.0685323	-0.313794	0.272	0.288	1	5	ubiquitin_carboxyl-terminal_hydrolase_4-like
LOC121410665	0.079581	-0.325562	0.279	0.288	1	5	eukaryotic_translation_initiation_factor_4B-like
LOC121407985	0.085284	-0.341227	0.333	0.333	1	5	vacuolar_protein_sorting-associated_protein_4B-like
LOC121419174	0.0999202	-0.378595	0.257	0.268	1	5	RNA-binding_protein_25-like
LOC121425215	0.109755	-0.375475	0.243	0.253	1	5	myosin_light_chain_kinase,_smooth_muscle-like
LOC121431730	0.110038	-0.310325	0.318	0.319	1	5	outer_mitochondrial_transmembrane_helix_translocase-like
LOC121428459	0.116978	-0.284911	0.731	0.593	1	5	endoplasmic_reticulum_chaperone_BiP-like
LOC121420998	0.12932	-0.377073	0.409	0.383	1	5	nucleosome_assembly_protein_1-like_1
LOC121408427	0.130218	-0.276922	0.559	0.495	1	5	coiled-coil-helix-coiled-coil-helix_domain-containing_protein_2-like
LOC121424790	0.150798	-0.433293	0.253	0.259	1	5	uncharacterized_LOC121424790
LOC121414150	0.164696	-0.28301	0.318	0.318	1	5	eukaryotic_translation_initiation_factor_1A,_Y-chromosomal-like
LOC121415035	0.167245	-0.404409	0.568	0.487	1	5	rho_guanine_nucleotide_exchange_factor_18-like
LOC121431598	0.174992	-0.32559	0.334	0.326	1	5	coiled-coil_domain-containing_protein_6-like
LOC121415187	0.200245	-0.407975	0.289	0.284	1	5	histone-lysine_N-methyltransferase_ASH1L-like
LOC121410498	0.204762	-0.399829	0.353	0.334	1	5	transcription_factor_E3-like
LOC121418950	0.204827	-0.32774	0.296	0.296	1	5	striatin-3-like
LOC121427592	0.235959	-0.271549	0.321	0.274	1	5	translocation_protein_SEC62-like
LOC121414272	0.24425	-0.288115	0.502	0.447	1	5	eukaryotic_translation_initiation_factor_2_subunit_3
LOC121431725	0.253456	-0.281891	0.654	0.539	1	5	uncharacterized_LOC121431725
LOC121419271	0.256054	-0.307823	0.274	0.272	1	5	cell_division_control_protein_42_homolog
LOC121428750	0.263422	-0.262926	0.355	0.347	1	5	nucleolar_protein_58-like
LOC121408794	0.270179	-0.309433	0.265	0.263	1	5	clustered_mitochondria_protein_homolog
LOC121407468	0.270993	-0.268732	0.397	0.331	1	5	Golgi_apparatus_protein_1-like
LOC121415564	0.273474	-0.385625	0.27	0.267	1	5	chromodomain-helicase-DNA-binding_protein_2-like
LOC121429605	0.286258	-0.368086	0.581	0.501	1	5	multidrug_resistance-associated_protein_5-like
LOC121408658	0.298704	-0.330865	0.28	0.277	1	5	ubiquitin_carboxyl-terminal_hydrolase_32-like
LOC121411406	0.327171	-0.267578	0.287	0.283	1	5	scaffold_attachment_factor_B2-like
LOC121419440	0.336569	-0.298694	0.275	0.273	1	5	bromodomain_adjacent_to_zinc_finger_domain_protein_1A-like
LOC121409069	0.35824	-0.302498	0.333	0.319	1	5	SREBP_regulating_gene_protein-like
LOC121427191	0.359191	-0.305093	0.525	0.45	1	5	nucleolin-like
LOC121428830	0.375503	-0.285248	0.51	0.45	1	5	ubiquitin_carboxyl-terminal_hydrolase_isozyme_L5-like
LOC121415197	0.381825	-0.32138	0.345	0.323	1	5	coatomer_subunit_epsilon-like
LOC121427485	0.386288	-0.258225	0.309	0.294	1	5	uncharacterized_protein_C1orf50_homolog
LOC121408698	0.392766	-0.307223	0.421	0.385	1	5	RNA-binding_protein_cabeza-like
LOC121415947	0.403888	-0.436741	0.478	0.41	1	5	phosphatidate_phosphatase_LPIN3-like
LOC121408907	0.418297	-0.261776	0.48	0.396	1	5	transcription_elongation_factor_SPT6-like
LOC121408647	0.455058	-0.396588	0.34	0.314	1	5	NADPH--cytochrome_P450_reductase-like
LOC121428570	0.457918	-0.250661	0.443	0.377	1	5	spliceosome_RNA_helicase_Ddx39b
LOC121428620	0.485082	-0.301523	0.485	0.427	1	5	ATP-binding_cassette_sub-family_F_member_1-like
LOC121431402	0.496491	-0.302555	0.277	0.268	1	5	nucleolar_protein_dao-5-like
LOC121408832	0.502772	-0.254084	0.334	0.294	1	5	rho_GTPase-activating_protein_26-like
LOC121429453	0.505078	-0.276366	0.343	0.317	1	5	H/ACA_ribonucleoprotein_complex_subunit_DKC1-like
LOC121410368	0.506707	-0.270762	0.417	0.353	1	5	talin-1-like
LOC121407400	0.527361	-0.258692	0.334	0.291	1	5	apoptotic_chromatin_condensation_inducer_in_the_nucleus-like
LOC121410148	0.543143	-0.346044	0.424	0.379	1	5	MAP_kinase-activated_protein_kinase_2-like
LOC121427237	0.55517	-0.313732	0.284	0.27	1	5	uncharacterized_LOC121427237
LOC121406199	0.569778	-0.320549	0.449	0.382	1	5	cryptochrome-1-like
LOC121415518	0.572018	-0.294755	0.307	0.292	1	5	casein_kinase_I-like
LOC121417221	0.589486	-0.322119	0.299	0.282	1	5	microtubule-associated_proteins_1A/1B_light_chain_3B-like
LOC121423225	0.600063	-0.347714	0.351	0.327	1	5	putative_RNA-binding_protein_Luc7-like_2
LOC121411243	0.628272	-0.271224	0.361	0.332	1	5	programmed_cell_death_6-interacting_protein-like
LOC121411018	0.643577	-0.25909	0.377	0.344	1	5	ubiquitin-like_modifier-activating_enzyme_1
LOC121410067	0.645397	-0.295275	0.291	0.261	1	5	ectopic_P_granules_protein_5_homolog
LOC121422447	0.647497	-0.291253	0.429	0.362	1	5	LLGL_scribble_cell_polarity_complex_component_2-like
LOC121408870	0.661274	-0.283763	0.378	0.342	1	5	DNA_ligase_1-like
LOC121411514	0.670757	-0.252427	0.498	0.439	1	5	HIG1_domain_family_member_1A,_mitochondrial-like
LOC121428511	0.674679	-0.267426	0.492	0.415	1	5	cdc42-interacting_protein_4-like
LOC121431457	0.676775	-0.320647	0.598	0.499	1	5	syntaxin-7-like
LOC121423686	0.696998	-0.253187	0.485	0.405	1	5	probable_rRNA-processing_protein_EBP2
LOC121410696	0.697265	-0.265125	0.265	0.255	1	5	homeobox_protein_Hox-A10-like
LOC121426229	0.740423	-0.25304	0.318	0.286	1	5	zinc_finger_protein_622-like
LOC121425891	0.774132	-0.261943	0.304	0.285	1	5	kinesin_heavy_chain
LOC121418320	0.787631	-0.297527	0.27	0.257	1	5	putative_transcription_factor_p65_homolog
LOC121410178	0.807699	-0.254321	0.608	0.499	1	5	heterogeneous_nuclear_ribonucleoprotein_A3-like
LOC121406997	0.844999	-0.254712	0.385	0.348	1	5	dnaJ_homolog_subfamily_A_member_2-like
LOC121424891	0.855269	-0.261778	0.343	0.31	1	5	uncharacterized_LOC121424891
LOC121406090	0.862963	-0.302983	0.443	0.386	1	5	protein_phosphatase_1_regulatory_subunit_12B-like
LOC121419198	0.878081	-0.257152	0.299	0.27	1	5	pre-mRNA-processing_factor_39-like
LOC121415061	0.886475	-0.261687	0.569	0.472	1	5	small_ubiquitin-related_modifier_3-like
LOC121418586	0.923879	-0.299336	0.429	0.369	1	5	protein_phosphatase_1B-like
LOC121411459	0.92913	-0.331472	0.324	0.293	1	5	inactive_histone-lysine_N-methyltransferase_2E-like
LOC121411083	0.947365	-0.255187	0.436	0.377	1	5	SRSF_protein_kinase_3-like
LOC121428321	0.95207	-0.27542	0.48	0.414	1	5	ATP-binding_cassette_sub-family_C_member_4-like
LOC121416219	0.955509	-0.26051	0.307	0.287	1	5	proprotein_convertase_subtilisin/kexin_type_5-like
LOC121425739	0.983363	-0.288564	0.414	0.364	1	5	TBC1_domain_family_member_14-like
LOC121408474	0.988439	-0.270067	0.409	0.358	1	5	RNA-binding_protein_Musashi_homolog_2-like
LOC121416842	9.44e-242	3.42882	0.37	0.013	1.67e-237	6	uncharacterized_LOC121416842
LOC121425227	2.76e-111	1.49226	0.265	0.017	4.87e-107	6	centrosomal_protein_of_55_kDa-like
LOC121420063	1.08e-105	2.63017	0.688	0.155	1.91e-101	6	AAC-rich_mRNA_clone_AAC4_protein-like
LOC121423346	6.74e-89	2.59628	0.476	0.08	1.19e-84	6	histone_H3.3A
LOC121428778	1.47e-75	2.97643	0.519	0.114	2.59e-71	6	heat_shock_70_kDa_protein_IV-like
LOC121428833	4.82e-71	3.38329	0.741	0.282	8.5e-67	6	heat_shock_70_kDa_protein_IV
LOC121414270	5.35e-69	1.97385	0.444	0.087	9.45e-65	6	probable_ribonuclease_ZC3H12D
LOC121408340	6.55e-68	2.05478	0.952	0.704	1.15e-63	6	CCAAT/enhancer-binding_protein_alpha-like
LOC121418514	1.87e-66	1.76344	0.995	0.948	3.3e-62	6	uncharacterized_LOC121418514
LOC121411741	6.1e-63	2.71846	0.333	0.053	1.08e-58	6	uncharacterized_LOC121411741
LOC121429030	2.89e-57	1.66523	0.91	0.611	5.1e-53	6	immediate_early_response_gene_5-like_protein
LOC121405859	1.4e-56	1.90327	0.82	0.43	2.47e-52	6	uncharacterized_LOC121405859
LOC121408173	6.28e-50	1.98022	0.81	0.493	1.11e-45	6	nucleoredoxin-like
LOC121424951	7.04e-42	1.74961	0.577	0.224	1.24e-37	6	uncharacterized_LOC121424951
LOC121426187	3.66e-39	1.69407	0.783	0.456	6.47e-35	6	uncharacterized_LOC121426187
LOC121409399	1.38e-38	1.65049	0.349	0.087	2.44e-34	6	histone_H1-beta,_late_embryonic-like
LOC121406318	4.39e-36	1.47995	0.64	0.306	7.74e-32	6	trichohyalin-like
LOC121411556	1.4e-33	1.75824	0.688	0.388	2.46e-29	6	thyrotroph_embryonic_factor-like
LOC121419144	9.61e-33	1.62324	0.471	0.178	1.7e-28	6	dual_specificity_protein_phosphatase_10-like
LOC121406009	1.46e-32	1.91003	0.402	0.13	2.57e-28	6	late_histone_H2B.L3-like
LOC121415910	2.59e-27	1.42215	0.333	0.104	4.57e-23	6	uncharacterized_LOC121415910
LOC121418929	3.83e-27	1.57671	0.534	0.264	6.77e-23	6	circularly_permutated_Ras_protein_1-like
LOC121428983	1.36e-26	1.88246	0.423	0.166	2.39e-22	6	uncharacterized_LOC121428983
LOC121422407	2.19e-23	1.27952	0.963	0.886	3.86e-19	6	histone_H1-delta-like
LOC121405836	4.36e-22	1.23047	0.36	0.137	7.7e-18	6	uncharacterized_LOC121405836
LOC121411302	9.98e-22	-0.468716	0.995	0.999	1.76e-17	6	ATP_synthase_F(0)_complex_subunit_C1,_mitochondrial-like
LOC121425834	3.25e-21	1.36184	0.434	0.202	5.73e-17	6	muscle_M-line_assembly_protein_unc-89-like
LOC121422207	8.71e-21	-0.326218	1	1	1.54e-16	6	40S_ribosomal_protein_S8-like
LOC121415608	9.84e-21	-0.407393	0.995	0.999	1.74e-16	6	60S_ribosomal_protein_L17-like
LOC121413087	4.11e-20	-0.499033	0.989	0.993	7.26e-16	6	elongation_factor_1-alpha
LOC121423647	5.22e-20	1.44972	0.651	0.445	9.22e-16	6	transcription_factor_AP-1-like
LOC121431806	3.08e-18	-0.37049	1	0.999	5.43e-14	6	40S_ribosomal_protein_S24-like
LOC121418926	1.18e-17	-0.550102	0.852	0.949	2.08e-13	6	uncharacterized_LOC121418926
LOC121423374	1.26e-17	-0.469548	0.974	0.998	2.22e-13	6	40S_ribosomal_protein_S2
LOC121410256	2.61e-17	1.14627	0.593	0.376	4.6e-13	6	rho-related_protein_racA-like
LOC121408650	4.61e-17	-0.365363	0.995	0.999	8.13e-13	6	60S_ribosomal_protein_L6-like
LOC121417612	1.07e-16	-0.379103	0.995	1	1.89e-12	6	40S_ribosomal_protein_S11-like
LOC121410477	1.16e-16	1.41034	0.376	0.172	2.05e-12	6	uncharacterized_LOC121410477
LOC121407061	1.58e-16	-0.393626	0.995	0.997	2.78e-12	6	60S_ribosomal_protein_L13-like
LOC121421387	1.7e-16	1.18809	0.265	0.097	3e-12	6	SAM_pointed_domain-containing_Ets_transcription_factor-like
LOC121431687	3.11e-16	-0.458301	0.958	0.983	5.48e-12	6	voltage-dependent_anion-selective_channel_protein_2-like
LOC121426719	5.32e-16	-0.324117	1	0.999	9.38e-12	6	60S_ribosomal_protein_L37a-like
LOC121419265	7.62e-16	-0.585246	0.857	0.951	1.34e-11	6	heat_shock_protein_HSP_90-beta-like
LOC121408906	2.04e-15	0.999219	0.402	0.204	3.6e-11	6	active_breakpoint_cluster_region-related_protein-like
LOC121428217	4.45e-15	-0.788782	0.27	0.594	7.85e-11	6	nucleolin-like
LOC121423799	5.27e-15	0.892933	0.709	0.564	9.3e-11	6	MAP_kinase-interacting_serine/threonine-protein_kinase_1-like
LOC121410020	6.41e-15	0.977477	0.587	0.405	1.13e-10	6	S-adenosylmethionine_sensor_upstream_of_mTORC1-like
LOC121422403	1.12e-14	-0.307164	1	1	1.98e-10	6	60S_ribosomal_protein_L10-like
LOC121418598	1.71e-14	1.0344	0.333	0.149	3.01e-10	6	E3_ubiquitin-protein_ligase_pellino_homolog_1-like
LOC121415352	2.78e-14	-0.323094	1	1	4.91e-10	6	40S_ribosomal_protein_S17-like
LOC121419157	2.84e-14	1.02264	0.772	0.701	5.01e-10	6	cytochrome_P450_3A6-like
LOC121430760	3.14e-14	0.898647	0.64	0.427	5.54e-10	6	actin_CyI,_cytoplasmic-like
LOC121425505	4.39e-14	-0.314854	1	1	7.75e-10	6	60S_ribosomal_protein_L26-like
LOC121413357	5.77e-14	-0.350519	0.974	0.993	1.02e-09	6	40S_ribosomal_protein_S3a-like
LOC121428227	1.5e-13	-0.323239	1	1	2.66e-09	6	60S_ribosomal_protein_L11
LOC121416183	1.75e-13	-0.534876	0.757	0.913	3.09e-09	6	14-3-3-like_protein_2
LOC121406261	3.8e-13	1.00913	0.291	0.13	6.71e-09	6	uncharacterized_LOC121406261
LOC121417187	3.83e-13	-0.311628	0.989	0.999	6.75e-09	6	60S_ribosomal_protein_L32-like
LOC121430528	9.35e-13	0.915322	0.339	0.165	1.65e-08	6	transcription_factor_Sox-17-alpha-A-like
LOC121423762	1.71e-12	1.11835	0.783	0.708	3.01e-08	6	dnaJ_homolog_subfamily_B_member_4-like
LOC121414299	2.14e-12	-0.325817	0.974	0.997	3.78e-08	6	60S_ribosomal_protein_L24-like
LOC121418982	2.35e-12	-0.27	0.995	1	4.15e-08	6	ubiquitin-40S_ribosomal_protein_S27a
LOC121428399	2.44e-12	-1.0882	0.169	0.43	4.31e-08	6	actin_CyI,_cytoplasmic
LOC121425624	5.94e-12	-0.40957	0.857	0.945	1.05e-07	6	uncharacterized_LOC121425624
LOC121423991	8.05e-12	0.955106	0.556	0.421	1.42e-07	6	next_to_BRCA1_gene_1_protein-like
LOC121429387	8.49e-12	-0.251224	1	1	1.5e-07	6	40S_ribosomal_protein_S26-like
LOC121411806	9.22e-12	-0.325013	0.995	0.999	1.63e-07	6	60S_ribosomal_protein_L18a-like
LOC121426330	1.62e-11	-0.448608	0.746	0.888	2.86e-07	6	ATP_synthase_subunit_beta,_mitochondrial
LOC121405827	1.9e-11	-0.836313	0.148	0.405	3.35e-07	6	G1/S-specific_cyclin-D1-like
LOC121413780	2.16e-11	1.10095	0.312	0.157	3.82e-07	6	sequestosome-1-like
LOC121416034	2.41e-11	-0.371406	0.952	0.985	4.25e-07	6	40S_ribosomal_protein_S15-like
LOC121406364	2.67e-11	0.764474	0.561	0.396	4.71e-07	6	uncharacterized_LOC121406364
LOC100134945	3.61e-11	-0.706756	0.354	0.624	6.36e-07	6	mortalin
LOC121418700	8.02e-11	-0.610558	0.439	0.7	1.41e-06	6	elongation_factor_1-gamma-like
LOC121420380	9.55e-11	0.881294	0.63	0.517	1.68e-06	6	protein_BTG3-like
LOC121405615	1.48e-10	1.0719	0.37	0.211	2.62e-06	6	U6_spliceosomal_RNA
LOC121420133	2.43e-10	-0.287508	1	0.999	4.28e-06	6	40S_ribosomal_protein_S19-like
LOC121428155	2.49e-10	-0.31559	0.952	0.98	4.4e-06	6	eukaryotic_translation_initiation_factor_5A-1-like
LOC121431800	4.17e-10	-0.59776	0.471	0.7	7.36e-06	6	histone_H2A.V
LOC121420278	5.42e-10	-0.257262	0.989	0.999	9.57e-06	6	ubiquitin
LOC121415203	5.91e-10	0.709133	0.624	0.479	1.04e-05	6	E3_ubiquitin-protein_ligase_arih1-like
LOC121418169	6.46e-10	-0.278554	1	1	1.14e-05	6	ubiquitin-like_protein_FUBI
LOC445810	6.8e-10	1.06001	0.376	0.227	1.2e-05	6	dynamin
LOC121420512	8.33e-10	-0.375146	0.868	0.957	1.47e-05	6	60S_ribosomal_protein_L19-like
LOC121427426	1.16e-09	-0.555442	0.545	0.736	2.05e-05	6	prohibitin-2-like
LOC121430716	1.18e-09	-0.553823	0.101	0.32	2.09e-05	6	trifunctional_enzyme_subunit_alpha,_mitochondrial-like
LOC121428403	1.24e-09	-0.267958	0.984	0.998	2.2e-05	6	40S_ribosomal_protein_S18
LOC121415818	1.34e-09	-0.551398	0.402	0.64	2.37e-05	6	ATP_synthase_subunit_alpha,_mitochondrial-like
LOC121430776	1.57e-09	-0.58624	0.18	0.427	2.77e-05	6	serine/threonine-protein_kinase_Sgk1-like
LOC121431891	1.64e-09	0.765806	0.455	0.3	2.89e-05	6	uncharacterized_LOC121431891
LOC121414332	2.13e-09	-0.284781	0.995	0.992	3.77e-05	6	60S_ribosomal_protein_L13a-like
LOC121424487	2.56e-09	0.974035	0.354	0.213	4.52e-05	6
LOC121423686	2.92e-09	-0.39868	0.164	0.418	5.14e-05	6	probable_rRNA-processing_protein_EBP2
LOC121423262	3.38e-09	1.00101	0.444	0.299	5.96e-05	6	chromobox_protein_homolog_8-like
LOC121411428	3.68e-09	-0.304188	0.958	0.978	6.5e-05	6	nucleoside_diphosphate_kinase_A_2-like
LOC121415334	3.75e-09	-0.53944	0.402	0.651	6.61e-05	6	uncharacterized_LOC121415334
LOC121411662	4.04e-09	-0.497044	0.571	0.777	7.12e-05	6	phosphate_carrier_protein,_mitochondrial-like
LOC121428312	5.24e-09	-0.298942	1	0.999	9.24e-05	6	actin,_cytoskeletal_1A
LOC121431688	7.25e-09	-0.54753	0.132	0.35	0.000127925	6	adenosine_kinase-like
LOC121410179	7.47e-09	-0.479333	0.265	0.521	0.00013188	6	nascent_polypeptide-associated_complex_subunit_alpha-like
LOC121416035	7.62e-09	-0.525275	0.164	0.385	0.000134376	6	NADH-quinone_oxidoreductase_subunit_B-like
LOC121422339	8.65e-09	-0.492762	0.095	0.305	0.000152598	6	39S_ribosomal_protein_L12,_mitochondrial-like
LOC121424971	1.16e-08	0.803592	0.296	0.16	0.000204516	6	proteoglycan_4-like
LOC121408316	1.17e-08	-0.593235	0.095	0.286	0.000205782	6	aspartate_aminotransferase,_mitochondrial-like
LOC121406953	1.21e-08	0.547852	0.778	0.731	0.000213236	6
LOC121418813	1.29e-08	-0.420513	0.757	0.877	0.000227436	6	galectin-8-like
LOC121410604	1.58e-08	-0.549327	0.275	0.517	0.000277951	6	serine--tRNA_ligase,_cytoplasmic-like
LOC121407996	1.66e-08	-0.536594	0.635	0.809	0.000293544	6	eukaryotic_translation_initiation_factor_2_subunit_2-like
LOC121415695	1.69e-08	-0.52479	0.365	0.615	0.00029759	6	ATP_synthase_subunit_alpha,_mitochondrial-like
LOC121417553	1.95e-08	-0.32797	0.889	0.928	0.000344823	6	60S_ribosomal_protein_L15-like
LOC121411553	3.02e-08	0.862178	0.561	0.469	0.000532048	6	uncharacterized_LOC121411553
LOC121431457	3.05e-08	0.937498	0.566	0.506	0.000537938	6	syntaxin-7-like
LOC121407456	3.47e-08	-0.520558	0.381	0.613	0.000612389	6	cytochrome_b-c1_complex_subunit_Rieske,_mitochondrial-like
LOC121429453	3.51e-08	-0.461236	0.122	0.324	0.000619314	6	H/ACA_ribonucleoprotein_complex_subunit_DKC1-like
LOC121428930	3.83e-08	1.29306	0.566	0.463	0.00067492	6	heme-binding_protein_2-like
LOC121406014	4.21e-08	-0.36299	0.704	0.848	0.000743202	6	ATP_synthase_F(0)_complex_subunit_B1,_mitochondrial-like
LOC121428698	4.35e-08	-0.491575	0.529	0.75	0.000767841	6	60S_ribosomal_protein_L7a-like
LOC121422462	5.13e-08	-0.459997	0.397	0.647	0.000905476	6	prohibitin-like
LOC121424051	5.83e-08	-0.41632	0.101	0.301	0.00102877	6	plasminogen_activator_inhibitor_1_RNA-binding_protein-like
LOC121414351	5.99e-08	-0.387051	0.111	0.307	0.00105685	6	leucine--tRNA_ligase,_cytoplasmic-like
LOC121408870	6.72e-08	-0.408586	0.138	0.35	0.001185	6	DNA_ligase_1-like
LOC121417224	8.05e-08	-0.460221	0.339	0.564	0.00142062	6	pumilio_homolog_2-like
LOC121423162	9.7e-08	-0.501592	0.116	0.303	0.00171145	6	methyltransferase-like_protein_27
LOC121428750	9.73e-08	-0.34797	0.148	0.353	0.00171686	6	nucleolar_protein_58-like
LOC121408794	9.86e-08	-0.552066	0.09	0.268	0.00173947	6	clustered_mitochondria_protein_homolog
LOC121431099	1.01e-07	-0.540009	0.169	0.377	0.00177448	6	protein_4.1-like
LOC121422410	1.14e-07	-0.516537	0.413	0.656	0.00201527	6	actin-related_protein_2/3_complex_subunit_1A-like
LOC121427378	1.26e-07	-0.47935	0.28	0.511	0.00222568	6	NADH_dehydrogenase_[ubiquinone]_1_beta_subcomplex_subunit_5,_mitochondrial-like
LOC121414272	1.27e-07	-0.397597	0.222	0.457	0.00224037	6	eukaryotic_translation_initiation_factor_2_subunit_3
LOC121426805	1.28e-07	-0.433196	0.138	0.337	0.0022593	6	MICOS_complex_subunit_MIC27-like
LOC121424678	1.33e-07	-0.366558	0.265	0.512	0.00234087	6	mitotic_apparatus_protein_p62-like
LOC121425215	1.36e-07	1.02064	0.365	0.249	0.00240815	6	myosin_light_chain_kinase,_smooth_muscle-like
LOC121409049	1.43e-07	-0.485033	0.222	0.442	0.00251708	6	coronin-6-like
LOC121411860	1.44e-07	-0.443679	0.413	0.687	0.00254383	6	caveolin-3-like
LOC121419549	1.47e-07	-0.511487	0.344	0.563	0.00260125	6	60S_ribosomal_protein_L30-like
LOC121418138	1.48e-07	0.892995	0.27	0.152	0.00260515	6	NF-kappa-B_inhibitor_alpha-like
LOC121431682	1.56e-07	-0.461581	0.153	0.355	0.00274838	6	gelsolin-like_protein_2
LOC121409137	1.58e-07	-0.448531	0.28	0.501	0.00279262	6	NADH-ubiquinone_oxidoreductase_subunit_8-like
LOC121418186	1.66e-07	-0.424115	0.333	0.568	0.00292249	6	60S_ribosomal_protein_L30-like
LOC121409239	1.77e-07	-0.390115	0.587	0.794	0.00312056	6	14-3-3_family_protein_artA-like
LOC121431604	1.77e-07	0.723654	0.619	0.553	0.00312373	6	steroid_17-alpha-hydroxylase/17,20_lyase-like
LOC121415061	2.15e-07	-0.47463	0.27	0.486	0.00379746	6	small_ubiquitin-related_modifier_3-like
LOC121415204	2.2e-07	-0.305654	0.836	0.91	0.00387443	6	cytochrome_c_oxidase_subunit_5A,_mitochondrial-like
LOC121426151	2.22e-07	-0.473797	0.19	0.394	0.00391758	6	SAP_domain-containing_ribonucleoprotein-like
LOC121429862	2.47e-07	-0.356067	0.37	0.619	0.00435444	6	uncharacterized_LOC121429862
LOC121410379	2.47e-07	-0.51693	0.185	0.389	0.00436189	6	cubilin-like
LOC121421007	2.51e-07	-0.346325	0.709	0.854	0.0044239	6	ATPase_inhibitor_A,_mitochondrial-like
LOC121415573	2.69e-07	-0.455367	0.503	0.729	0.00474522	6	proteasome_subunit_alpha_type-4-like
LOC121416285	2.87e-07	-0.462298	0.111	0.293	0.00506858	6	threonine--tRNA_ligase_1,_cytoplasmic-like
LOC121411410	2.94e-07	-0.453571	0.243	0.466	0.00519499	6	acidic_leucine-rich_nuclear_phosphoprotein_32_family_member_B-like
LOC121427648	3.04e-07	-0.542313	0.286	0.499	0.00536542	6	nucleolin-like
LOC121422352	3.49e-07	-0.327544	0.159	0.361	0.00615674	6	aconitate_hydratase,_mitochondrial-like
LOC121430846	3.5e-07	-0.380285	0.698	0.832	0.00617386	6	cytochrome_c_oxidase_subunit_5B,_mitochondrial-like
LOC121422285	3.58e-07	-0.44912	0.201	0.419	0.00632407	6	uncharacterized_LOC121422285
LOC121418502	3.72e-07	-0.522841	0.116	0.299	0.00656622	6	calmodulin
LOC121430258	4e-07	-0.392138	0.661	0.831	0.0070636	6	sodium/potassium-transporting_ATPase_subunit_beta-3-like
LOC121420210	4.18e-07	-0.363008	0.661	0.804	0.00737628	6	ATP_synthase-coupling_factor_6,_mitochondrial-like
LOC121427466	4.18e-07	-0.370753	0.534	0.75	0.00738102	6	glyceraldehyde-3-phosphate_dehydrogenase-like
LOC121411855	4.42e-07	-0.252389	0.989	0.992	0.00780497	6	40S_ribosomal_protein_S23
LOC121411709	4.43e-07	-0.441114	0.148	0.339	0.00782094	6	uncharacterized_LOC121411709
LOC121431716	4.69e-07	-0.351331	0.831	0.925	0.00826723	6	peptidyl-prolyl_cis-trans_isomerase
LOC121405922	4.83e-07	-0.453175	0.349	0.571	0.00852078	6	NADH_dehydrogenase_[ubiquinone]_1_beta_subcomplex_subunit_2,_mitochondrial-like
LOC121428855	4.92e-07	-0.387244	0.27	0.491	0.00867882	6	60S_ribosomal_protein_L7a-like
LOC121410666	5.76e-07	0.583714	0.714	0.659	0.0101664	6	protein_BTG1-like
LOC121417095	5.83e-07	-0.426086	0.233	0.45	0.0102839	6	APOBEC1_complementation_factor-like
LOC121422297	5.88e-07	-0.269653	0.979	0.99	0.0103786	6	60S_ribosomal_protein_L18-like
LOC121423170	5.9e-07	0.712004	0.651	0.588	0.010407	6	CD63_antigen-like
LOC121411534	5.94e-07	-0.430673	0.28	0.497	0.0104867	6	eukaryotic_translation_initiation_factor_5B-like
LOC121426629	6.68e-07	-0.489566	0.201	0.407	0.0117786	6	hydroxyacid_oxidase_1-like
LOC121422456	7.33e-07	0.349223	0.947	0.961	0.012938	6	uncharacterized_LOC121422456
LOC121425875	8e-07	-0.369593	0.344	0.583	0.0141223	6	elongation_factor_1-beta-like
LOC121409126	8.24e-07	-0.442383	0.116	0.285	0.0145465	6	small_nuclear_ribonucleoprotein_Sm_D3-like
LOC121427251	8.46e-07	-0.393857	0.28	0.507	0.0149191	6	dolichyl-diphosphooligosaccharide--protein_glycosyltransferase_48_kDa_subunit-like
LOC121411171	9.15e-07	-0.414561	0.63	0.813	0.0161369	6	60S_ribosomal_protein_L23
LOC121428620	1.03e-06	-0.394127	0.228	0.437	0.0181995	6	ATP-binding_cassette_sub-family_F_member_1-like
LOC121418656	1.07e-06	-0.254656	1	1	0.0188782	6	fatty_acid-binding_protein_type_3-like
LOC121428167	1.19e-06	-0.420345	0.354	0.574	0.0209663	6	squalene_synthase-like
LOC121429222	1.21e-06	0.299384	0.931	0.937	0.0213192	6	uncharacterized_LOC121429222
LOC121424789	1.36e-06	-0.279883	0.259	0.491	0.0240055	6	pantothenate_kinase_3-like
LOC121417536	1.4e-06	-0.313173	0.841	0.924	0.0246859	6	60S_ribosomal_protein_L15-like
LOC121417436	1.4e-06	-0.408431	0.376	0.6	0.0247559	6	proliferation-associated_protein_2G4-like
LOC121415989	1.42e-06	0.743684	0.45	0.34	0.0250465	6	transcription_factor_HIVEP3-like
LOC121417109	1.44e-06	-0.441837	0.206	0.396	0.0254793	6	APOBEC1_complementation_factor-like
LOC121428519	1.45e-06	-0.471532	0.233	0.434	0.0255726	6	actin-15B
LOC121408797	1.45e-06	-0.359648	0.296	0.524	0.0256284	6	eukaryotic_translation_initiation_factor_3_subunit_C-like
LOC121423147	1.55e-06	-0.41361	0.466	0.676	0.0272813	6	NADH_dehydrogenase_[ubiquinone]_1_alpha_subcomplex_subunit_6-like
LOC121425027	1.57e-06	0.896078	0.349	0.232	0.0276265	6	F-box/LRR-repeat_protein_2-like
LOC121417146	1.69e-06	-0.388599	0.095	0.256	0.0297554	6	26S_proteasome_non-ATPase_regulatory_subunit_2-like
LOC121426523	1.8e-06	0.675207	0.635	0.64	0.0317893	6	pituitary_tumor-transforming_gene_1_protein-interacting_protein-like
LOC121411514	1.89e-06	-0.362766	0.243	0.449	0.0333828	6	HIG1_domain_family_member_1A,_mitochondrial-like
LOC121419436	2.15e-06	-0.308861	0.243	0.454	0.0379908	6	actin-related_protein_2-A
LOC121418797	2.22e-06	-0.431654	0.418	0.631	0.0392238	6	heterogeneous_nuclear_ribonucleoprotein_U-like_protein_1
LOC121425882	2.31e-06	-0.357694	0.323	0.542	0.040731	6	60_kDa_heat_shock_protein,_mitochondrial-like
LOC121421443	2.49e-06	-0.290662	0.122	0.292	0.0439591	6	NADH_dehydrogenase_[ubiquinone]_1_alpha_subcomplex_subunit_9,_mitochondrial-like
LOC121431730	2.6e-06	-0.426128	0.153	0.324	0.0458024	6	outer_mitochondrial_transmembrane_helix_translocase-like
LOC121419906	2.77e-06	-0.354892	0.725	0.851	0.0488476	6	ATP_synthase_subunit_g,_mitochondrial-like
LOC121409303	2.78e-06	0.931166	0.296	0.186	0.0490642	6	protein_yippee-like_2
LOC121411747	2.79e-06	-0.421667	0.19	0.377	0.0491519	6	sodium-_and_chloride-dependent_GABA_transporter_2-like
LOC121425230	2.8e-06	-0.369493	0.36	0.577	0.0493172	6	folate_receptor_gamma-like
LOC121415190	2.92e-06	0.698379	0.624	0.573	0.0514351	6	bcl-2-like_protein_2
LOC121430638	3.01e-06	0.889576	0.508	0.425	0.053039	6	monocarboxylate_transporter_2-like
LOC121408594	3.05e-06	-0.436371	0.138	0.303	0.0538946	6	solute_carrier_family_43_member_3-like
LOC121428363	3.16e-06	-0.356599	0.148	0.327	0.0557324	6	valine--tRNA_ligase-like
LOC121418824	3.26e-06	-0.275648	0.82	0.9	0.057483	6	cytochrome_c_oxidase_subunit_7A2,_mitochondrial-like
LOC121411555	3.29e-06	-0.306098	0.741	0.88	0.0580048	6	uncharacterized_LOC121411555
LOC121424790	3.44e-06	0.785413	0.365	0.256	0.0607185	6	uncharacterized_LOC121424790
LOC121428033	3.54e-06	-0.450291	0.138	0.299	0.062526	6	alkaline_phosphatase-like
LOC121427437	3.57e-06	-0.416088	0.206	0.39	0.0630502	6	ATPase_family_AAA_domain-containing_protein_3-B-like
LOC121410947	3.58e-06	-0.388877	0.238	0.442	0.0632345	6	high_mobility_group_protein_1_homolog
LOC121416812	3.74e-06	-0.364156	0.159	0.34	0.0659022	6	proline_rich_transmembrane_protein_1B-like
LOC121424952	3.81e-06	-0.364107	0.127	0.295	0.0672399	6	2,3-bisphosphoglycerate-independent_phosphoglycerate_mutase-like
LOC121431839	3.98e-06	-0.412373	0.138	0.3	0.0701422	6	glutathione_S-transferase_1-like
LOC121430715	4.16e-06	-0.302472	0.328	0.539	0.0733996	6	peptidyl-prolyl_cis-trans_isomerase_FKBP1B-like
LOC121413613	4.23e-06	-0.440806	0.492	0.701	0.0746083	6	uncharacterized_LOC121413613
LOC121422466	4.64e-06	-0.302124	0.323	0.547	0.0818126	6	cytochrome_b-c1_complex_subunit_2,_mitochondrial-like
LOC121427570	4.74e-06	-0.421204	0.317	0.521	0.0836	6	vigilin-like
LOC121428158	4.92e-06	-0.326198	0.466	0.669	0.086848	6	cytochrome_b-c1_complex_subunit_7-like
LOC121407007	4.93e-06	-0.340364	0.18	0.35	0.0869041	6	NADH_dehydrogenase_[ubiquinone]_flavoprotein_2,_mitochondrial-like
LOC121411148	4.95e-06	-0.337121	0.196	0.383	0.0872897	6	mitochondrial-processing_peptidase_subunit_beta-like
LOC121416295	5e-06	-0.441106	0.365	0.57	0.0882619	6	betaine--homocysteine_S-methyltransferase_1-like
LOC121431622	5.09e-06	-0.677513	0.228	0.406	0.0897376	6	uncharacterized_LOC121431622
LOC121427475	5.27e-06	-0.328975	0.265	0.465	0.0929271	6	chromodomain-helicase-DNA-binding_protein_Mi-2_homolog
LOC121418777	5.31e-06	-0.315092	0.228	0.431	0.0936191	6	small_nuclear_ribonucleoprotein_Sm_D2
LOC121410320	5.43e-06	-0.433809	0.28	0.474	0.0958183	6	heterogeneous_nuclear_ribonucleoprotein_A3-like
LOC121408814	5.44e-06	-0.392846	0.709	0.841	0.0959356	6	dynein_light_chain_LC6,_flagellar_outer_arm-like
LOC121423590	5.7e-06	-0.353174	0.106	0.257	0.100611	6	phenylalanine--tRNA_ligase_alpha_subunit-like
LOC121425603	5.71e-06	-0.408806	0.878	0.96	0.10083	6	periostin-like
LOC121407238	6.04e-06	-0.31474	0.159	0.335	0.106569	6	apoptosis-inducing_factor_1,_mitochondrial-like
LOC121414288	6.63e-06	-0.354417	0.82	0.917	0.117042	6	tubulin_alpha-1A_chain-like
LOC121405795	6.68e-06	-0.425287	0.439	0.636	0.117785	6	transmembrane_protein_258
LOC121431114	6.91e-06	-0.428592	0.212	0.399	0.121838	6	elongation_factor_1-alpha_2-like
LOC121423713	7.03e-06	-0.371007	0.222	0.417	0.123965	6	cAMP-dependent_protein_kinase_catalytic_subunit_alpha-like
LOC121423953	7.37e-06	-0.341695	0.233	0.427	0.130067	6	NADH_dehydrogenase_[ubiquinone]_1_alpha_subcomplex_subunit_7-like
LOC121408698	7.39e-06	-0.362138	0.206	0.393	0.13041	6	RNA-binding_protein_cabeza-like
LOC121410003	7.8e-06	-0.402987	0.201	0.388	0.137536	6	glutamine--tRNA_ligase-like
LOC121405875	8.09e-06	0.811448	0.365	0.261	0.142653	6	F-actin-monooxygenase_MICAL3-like
LOC121418990	9.11e-06	-0.355947	0.354	0.567	0.160713	6	polyadenylate-binding_protein_4-like
LOC121425160	9.23e-06	-0.318403	0.455	0.68	0.162865	6	succinate--CoA_ligase_[ADP/GDP-forming]_subunit_alpha,_mitochondrial-like
LOC121427508	9.87e-06	0.276317	0.989	0.989	0.174165	6	uncharacterized_LOC121427508
LOC121422424	1.05e-05	-0.319787	0.169	0.337	0.184636	6	RNA-binding_protein_with_serine-rich_domain_1-like
LOC121410794	1.05e-05	-0.370555	0.28	0.476	0.184769	6	chromobox_protein_homolog_1-like
LOC446166	1.06e-05	-0.343532	0.323	0.522	0.187882	6	embryonic_blastocoelar_extracellular_matrix_protein_precursor
LOC121418613	1.08e-05	-0.363895	0.265	0.464	0.190281	6	proteasome_subunit_alpha_type-6-like
LOC121406997	1.16e-05	-0.256106	0.175	0.355	0.203968	6	dnaJ_homolog_subfamily_A_member_2-like
LOC121419298	1.16e-05	-0.296341	0.397	0.626	0.204592	6	ergosterol_biosynthetic_protein_28-like
LOC121418763	1.16e-05	-0.377654	0.19	0.365	0.205369	6
LOC121408275	1.2e-05	-0.34414	0.392	0.615	0.21112	6	NADH_dehydrogenase_[ubiquinone]_iron-sulfur_protein_6,_mitochondrial-like
LOC121423036	1.2e-05	-0.278807	0.153	0.318	0.211123	6	serine/arginine-rich_splicing_factor_2-like
LOC121424308	1.22e-05	-0.421983	0.249	0.431	0.215106	6	trans-1,2-dihydrobenzene-1,2-diol_dehydrogenase-like
LOC121415581	1.23e-05	-0.349742	0.455	0.681	0.217359	6	keratinocyte-associated_protein_2-like
LOC121418433	1.3e-05	-0.301593	0.143	0.3	0.230177	6	sphingolipid_delta(4)-desaturase_DES1-like
LOC121418955	1.37e-05	-0.26416	0.772	0.893	0.240996	6	uncharacterized_LOC121418955
LOC121424994	1.38e-05	-0.250205	1	1	0.243408	6	uncharacterized_LOC121424994
LOC121415055	1.61e-05	-0.273585	0.328	0.543	0.283248	6	tropomyosin-2-like
LOC121414451	1.63e-05	-0.362213	0.46	0.664	0.28776	6	40S_ribosomal_protein_S4-like
LOC121415559	1.69e-05	-0.391113	0.598	0.759	0.298762	6	translocon-associated_protein_subunit_beta-like
LOC121423109	1.71e-05	-0.283311	0.291	0.501	0.301118	6	NADH_dehydrogenase_[ubiquinone]_1_beta_subcomplex_subunit_10-like
LOC121415962	1.73e-05	-0.353763	0.36	0.568	0.304896	6	endophilin-A3-like
LOC121416112	1.74e-05	-0.393589	0.111	0.252	0.306607	6	RNA-binding_protein_8A-like
LOC121426152	1.76e-05	-0.428482	0.339	0.529	0.311254	6	acyl-CoA-binding_protein-like
LOC121432076	1.77e-05	-0.28792	0.206	0.383	0.313156	6	glutamate_dehydrogenase,_mitochondrial-like
LOC121405994	1.93e-05	-0.339416	0.111	0.259	0.340734	6	thymidine_phosphorylase-like
LOC121419347	2.01e-05	-0.250666	0.312	0.527	0.355407	6	V-type_proton_ATPase_subunit_D-like
LOC121426908	2.06e-05	-0.295921	0.582	0.753	0.363966	6	insulin-like_growth_factor_2_mRNA-binding_protein_3
LOC121407613	2.07e-05	-0.30371	0.27	0.468	0.36523	6	dehydrogenase/reductase_SDR_family_member_1-like
LOC121426200	2.08e-05	-0.308991	0.185	0.36	0.36741	6	RNA-binding_motif,_single-stranded-interacting_protein_2-like
LOC121423325	2.14e-05	-0.321176	0.46	0.668	0.378289	6	uncharacterized_LOC121423325
LOC121408261	2.28e-05	-0.411326	0.243	0.408	0.402809	6	cytochrome_b5-like
LOC121407404	2.28e-05	-0.329956	0.413	0.619	0.403042	6	proteasome_subunit_alpha_type-7
LOC121411829	2.33e-05	-0.315685	0.265	0.462	0.41133	6	inactive_selenide,_water_dikinase-like_protein
LOC121415630	2.34e-05	-0.409426	0.317	0.503	0.412348	6	NADH_dehydrogenase_[ubiquinone]_iron-sulfur_protein_4,_mitochondrial-like
LOC121410696	2.43e-05	-0.302418	0.111	0.26	0.427972	6	homeobox_protein_Hox-A10-like
LOC121431829	2.43e-05	-0.309645	0.402	0.603	0.428478	6	ras_GTPase-activating_protein-binding_protein_2-like
LOC121411748	2.57e-05	-0.382751	0.688	0.841	0.453088	6	spore_wall_protein_2-like
LOC121412403	2.68e-05	-0.254557	0.196	0.375	0.472352	6	extracellular_matrix_protein_3
LOC121429263	2.83e-05	-0.308447	0.222	0.411	0.500012	6	double-stranded_RNA-binding_protein_Staufen_homolog_2-like
LOC121423659	2.94e-05	-0.306188	0.317	0.514	0.518935	6	peroxiredoxin-1-like
LOC121415660	3.49e-05	-0.260168	0.54	0.734	0.61545	6	activated_RNA_polymerase_II_transcriptional_coactivator_p15-like
LOC121408427	3.55e-05	-0.348573	0.312	0.505	0.626252	6	coiled-coil-helix-coiled-coil-helix_domain-containing_protein_2-like
LOC121410322	3.57e-05	-0.372572	0.127	0.268	0.630146	6	sorting_nexin-5-like
LOC121428202	3.7e-05	-0.301806	0.646	0.776	0.65259	6	Y-box_factor_homolog
LOC121407003	3.8e-05	-0.300144	0.222	0.399	0.670013	6	amine_oxidase_[flavin-containing]_B-like
LOC121426055	4.08e-05	-0.33651	0.667	0.818	0.720325	6	cytochrome_c-like
LOC121429464	4.22e-05	-0.291956	0.164	0.32	0.744559	6	thioredoxin_reductase-like_selenoprotein_T
LOC121417127	4.56e-05	-0.376214	0.254	0.418	0.80419	6	NADH_dehydrogenase_[ubiquinone]_1_alpha_subcomplex_subunit_11-like
LOC121424922	4.76e-05	-0.294093	0.545	0.727	0.840465	6	small_nuclear_ribonucleoprotein_G-like
LOC121410481	5.25e-05	-0.331877	0.148	0.293	0.925852	6	dolichyl-diphosphooligosaccharide--protein_glycosyltransferase_subunit_1-like
LOC121410019	5.34e-05	-0.313197	0.143	0.29	0.942549	6	ubiquitin_carboxyl-terminal_hydrolase_4-like
LOC121409673	5.84e-05	-0.337671	0.127	0.26	1	6	kinesin-like_protein_KIF28P
LOC121428758	6.01e-05	-0.29886	0.476	0.672	1	6	peroxiredoxin-6-like
LOC121418567	6.11e-05	-0.287332	0.127	0.266	1	6	uncharacterized_LOC121418567
LOC121411391	6.12e-05	-0.343448	0.196	0.347	1	6	epoxide_hydrolase_3-like
LOC121419382	6.3e-05	-0.333381	0.249	0.415	1	6	delta(14)-sterol_reductase_TM7SF2-like
LOC121411826	6.56e-05	-0.298859	0.254	0.428	1	6	mitochondrial_import_inner_membrane_translocase_subunit_Tim16-like
LOC121426742	6.67e-05	-0.345548	0.138	0.275	1	6	co-chaperone_protein_p23-1-like
LOC121410359	7.85e-05	-0.269347	0.233	0.398	1	6	glycerol-3-phosphate_dehydrogenase_[NAD(+)],_cytoplasmic-like
LOC121408550	8.2e-05	-0.346235	0.37	0.557	1	6	GTP-binding_nuclear_protein_Ran-like
LOC121410004	8.22e-05	-0.273054	0.466	0.673	1	6	ras-related_protein_Rap-1b-like
LOC121407387	8.95e-05	-0.285924	0.159	0.312	1	6	uncharacterized_LOC121407387
LOC121418432	9.42e-05	-0.267187	0.233	0.397	1	6	glycine-rich_RNA-binding_protein_1-like
LOC121425403	0.00010148	-0.359784	0.54	0.716	1	6	hexokinase-2-like
LOC121410780	0.000102572	-0.335378	0.222	0.377	1	6	MKI67_FHA_domain-interacting_nucleolar_phosphoprotein-like
LOC121422729	0.000102892	-0.29277	0.709	0.836	1	6	uncharacterized_LOC121422729
LOC121411899	0.00010486	0.756206	0.339	0.255	1	6	ankyrin_repeat_domain-containing_protein_27-like
LOC121414333	0.000109885	-0.255782	0.312	0.51	1	6	superoxide_dismutase_[Cu-Zn]-like
LOC121410861	0.00011021	-0.311482	0.471	0.659	1	6	60S_ribosomal_protein_L4-B-like
LOC121411742	0.000115971	-0.279192	0.646	0.784	1	6	ATP_synthase_subunit_gamma,_mitochondrial-like
LOC121410178	0.000116857	-0.28867	0.333	0.512	1	6	heterogeneous_nuclear_ribonucleoprotein_A3-like
LOC121411571	0.000122319	0.656361	0.439	0.357	1	6	synaptophysin-like
LOC121427376	0.000125952	-0.265747	0.381	0.586	1	6	enolase-like
LOC121418862	0.00012814	-0.320671	0.466	0.642	1	6	heat_shock_protein_Hsp-16.48/Hsp-16.49-like
LOC121425282	0.000129913	-0.258828	0.206	0.368	1	6	aldo-keto_reductase_family_1_member_B1-like
LOC121425738	0.000130987	-0.336508	0.259	0.421	1	6	uncharacterized_LOC121425738
LOC121426318	0.000132784	-0.287647	0.296	0.479	1	6	angiotensin-converting_enzyme-like
LOC121415611	0.000132896	-0.299959	0.28	0.455	1	6	sorting_nexin-2-like
LOC121427368	0.000143712	-0.307934	0.132	0.264	1	6	eukaryotic_translation_initiation_factor_4_gamma_1-like
LOC121411431	0.000154648	-0.324563	0.302	0.472	1	6	ADP-ribosylation_factor_4-like
LOC121431423	0.00015935	0.633415	0.524	0.495	1	6	syntenin-1-like
LOC121422281	0.000198623	0.547303	0.587	0.567	1	6	ATP-dependent_RNA_helicase_dbp2-like
LOC121410701	0.00021508	-0.279709	0.291	0.464	1	6	protein_disulfide-isomerase_A5-like
LOC121432077	0.000234775	-0.297117	0.508	0.701	1	6	heterogeneous_nuclear_ribonucleoprotein_D-like
LOC121422183	0.000237211	-0.250397	0.206	0.367	1	6	myosin-10-like
LOC121423422	0.000250964	-0.378357	0.28	0.435	1	6	aldehyde_dehydrogenase,_mitochondrial-like
LOC121426482	0.000258475	0.714967	0.275	0.198	1	6	unconventional_myosin-X-like
LOC121429193	0.000314794	-0.314543	0.233	0.381	1	6	high_affinity_copper_uptake_protein_1-like
LOC121419389	0.000323803	0.533816	0.603	0.597	1	6	mRNA_decay_activator_protein_ZFP36L2-A-like
LOC121409246	0.000351185	-0.310313	0.148	0.272	1	6	transcription_intermediary_factor_1-alpha-like
LOC121431795	0.000361461	-0.251293	0.212	0.358	1	6	marginal_zone_B-_and_B1-cell-specific_protein-like
LOC121418776	0.000367232	-0.322894	0.402	0.586	1	6	peptidyl-prolyl_cis-trans_isomerase_FKBP2-like
LOC121415209	0.000381063	-0.347362	0.201	0.341	1	6	MAM_and_LDL-receptor_class_A_domain-containing_protein_1-like
LOC121424125	0.000391227	-0.294123	0.138	0.262	1	6	protein_Wnt-6-like
LOC447796	0.000411941	0.706222	0.302	0.219	1	6	G-cadherin
LOC121420440	0.00043379	-0.416999	0.307	0.457	1	6	cytochrome_P450_3A8-like
LOC121405946	0.000438869	-0.303349	0.254	0.405	1	6	tyrosine_3-monooxygenase-like
LOC121423158	0.000443973	-0.310757	0.714	0.838	1	6	apolipoprotein_D-like
LOC121432073	0.000451751	-0.305087	0.413	0.599	1	6	acyl-CoA_6-desaturase-like
LOC121419232	0.000474899	0.632395	0.291	0.213	1	6	spastin-like
LOC121423822	0.000536964	0.565247	0.413	0.352	1	6	UMP-CMP_kinase-like
LOC121411075	0.000542097	-0.276074	0.275	0.431	1	6	mitochondrial_10-formyltetrahydrofolate_dehydrogenase-like
LOC121411918	0.00064001	-0.289618	0.185	0.316	1	6	protein_diaphanous_homolog_2-like
LOC121423744	0.000705843	-0.335293	0.148	0.263	1	6	Krueppel-like_factor_5
LOC121411843	0.000735775	-0.313741	0.265	0.42	1	6	endoplasmin-like
LOC121423636	0.000760404	-0.265511	0.788	0.894	1	6	calreticulin-like
LOC121418873	0.00082306	-0.27131	0.503	0.703	1	6	aquaporin-8-like
LOC121418977	0.000828849	0.673413	0.259	0.184	1	6	mitogen-activated_protein_kinase-binding_protein_1-like
LOC121407706	0.000831347	-0.25842	0.27	0.425	1	6	membrane-associated_progesterone_receptor_component_1-like
LOC121408647	0.00109008	0.729098	0.37	0.315	1	6	NADPH--cytochrome_P450_reductase-like
LOC121431291	0.00111234	0.624239	0.392	0.339	1	6	iroquois-class_homeodomain_protein_irx-3-like
LOC121416874	0.00162211	-0.294823	0.296	0.439	1	6	sodium/myo-inositol_cotransporter_2-like
LOC121423022	0.00167475	0.496355	0.444	0.378	1	6	mitogen-activated_protein_kinase_kinase_kinase_13-like
LOC121424800	0.00170073	0.570969	0.28	0.209	1	6	prominin-1-A-like
LOC121410605	0.00173552	0.529987	0.556	0.571	1	6	ras_association_domain-containing_protein_5-like
LOC121428459	0.00190934	-0.338851	0.429	0.609	1	6	endoplasmic_reticulum_chaperone_BiP-like
LOC121417221	0.00218149	0.633816	0.344	0.282	1	6	microtubule-associated_proteins_1A/1B_light_chain_3B-like
LOC121410441	0.00227236	-0.283632	0.185	0.297	1	6	metalloproteinase_inhibitor_3-like
LOC121408139	0.00279549	-0.272932	0.413	0.565	1	6	proteasome_subunit_beta_type-5-like
LOC121415187	0.00305471	0.544983	0.344	0.283	1	6	histone-lysine_N-methyltransferase_ASH1L-like
LOC121428219	0.00318505	0.446211	0.757	0.848	1	6	vesicle-associated_membrane_protein_3-like
LOC121422288	0.00338987	-0.320475	0.651	0.77	1	6	fatty_acid_synthase-like
LOC121430031	0.00451022	0.775673	0.291	0.24	1	6	arginine_and_glutamate-rich_protein_1-like
LOC121415546	0.00557037	-0.25628	0.307	0.425	1	6	asparagine--tRNA_ligase,_cytoplasmic-like
LOC121419338	0.00661743	0.571842	0.407	0.345	1	6	ADP-ribosylation_factor-like
LOC121425498	0.00669246	0.559127	0.27	0.212	1	6	pleckstrin_homology_domain-containing_family_A_member_1-like
LOC121410148	0.00733158	0.604059	0.407	0.382	1	6	MAP_kinase-activated_protein_kinase_2-like
LOC121423225	0.00950986	0.666654	0.365	0.328	1	6	putative_RNA-binding_protein_Luc7-like_2
LOC121415894	0.0109527	0.436847	0.503	0.497	1	6	polyubiquitin-C-like
LOC121431681	0.0110826	0.453571	0.418	0.385	1	6	TNFAIP3-interacting_protein_1-like
LOC121408658	0.0122131	0.525621	0.323	0.276	1	6	ubiquitin_carboxyl-terminal_hydrolase_32-like
LOC121422994	0.0248684	0.290288	0.577	0.619	1	6	brain_protein_I3-like
LOC121410373	0.0248978	0.587913	0.333	0.303	1	6	CDC42_small_effector_protein_2-like
LOC121422540	0.0258699	0.346872	0.577	0.606	1	6	uncharacterized_protein_K02A2.6-like
LOC121411767	0.0268468	0.554754	0.381	0.361	1	6	uncharacterized_LOC121411767
LOC121419156	0.0276831	0.512608	0.466	0.489	1	6	cytochrome_P450_3A24-like
LOC121422319	0.0280596	0.353041	0.513	0.539	1	6	probable_serine_incorporator
LOC121420333	0.0302737	0.450723	0.37	0.336	1	6	uncharacterized_LOC121420333
LOC121427392	0.0330126	0.446548	0.402	0.381	1	6	tumor_protein_D52-like
LOC121407994	0.0352704	0.666137	0.259	0.223	1	6	RNA-binding_protein_39-like
LOC121413120	0.0356939	0.570193	0.323	0.295	1	6	RING-box_protein_1
LOC121427391	0.0429794	0.253835	0.783	0.842	1	6	gamma-aminobutyric_acid_receptor-associated_protein
LOC121410365	0.0474358	0.431788	0.323	0.289	1	6	DAZ-associated_protein_2-like
LOC121413578	0.0502335	0.780661	0.307	0.27	1	6	uncharacterized_LOC121413578
LOC121407044	0.0506187	0.474263	0.354	0.347	1	6	IST1_homolog
LOC121411746	0.0507409	0.491492	0.339	0.312	1	6	sodium-_and_chloride-dependent_GABA_transporter_1-like
LOC121429715	0.0532754	0.583651	0.28	0.254	1	6	multidrug_resistance-associated_protein_5-like
LOC121426401	0.0673832	0.421226	0.265	0.23	1	6	rho_GTPase-activating_protein_27-like
LOC121410526	0.0737938	0.404509	0.265	0.237	1	6	protein_kinase_C_delta_type-like
LOC121415663	0.0785584	0.479845	0.291	0.261	1	6	apoptotic_chromatin_condensation_inducer_in_the_nucleus-like
LOC121408331	0.0809272	0.479795	0.286	0.259	1	6	gamma-aminobutyric_acid_receptor-associated_protein-like_2
LOC121411243	0.0930725	0.380274	0.349	0.334	1	6	programmed_cell_death_6-interacting_protein-like
LOC121418011	0.0977363	0.344705	0.254	0.219	1	6	organic_solute_transporter_subunit_alpha-like
LOC121420439	0.0977775	0.39868	0.307	0.288	1	6	cytochrome_P450_3A4-like
LOC121422929	0.0995559	0.350834	0.27	0.235	1	6	formin-like_protein_18
LOC121415035	0.116193	0.477492	0.46	0.495	1	6	rho_guanine_nucleotide_exchange_factor_18-like
LOC121408832	0.117057	0.401881	0.317	0.297	1	6	rho_GTPase-activating_protein_26-like
LOC121409705	0.123164	0.366864	0.312	0.292	1	6	peptide_methionine_sulfoxide_reductase-like
LOC121415060	0.187412	0.441311	0.286	0.268	1	6	uncharacterized_LOC121415060
LOC121408320	0.20526	0.444643	0.37	0.388	1	6	NPC_intracellular_cholesterol_transporter_1-like
LOC121428511	0.206738	0.391447	0.392	0.422	1	6	cdc42-interacting_protein_4-like
LOC121412046	0.210628	0.429398	0.354	0.359	1	6	uncharacterized_LOC121412046
LOC121410922	0.211353	0.394852	0.265	0.256	1	6	ubiquitin-conjugating_enzyme_E2_H-like
LOC121410498	0.213955	0.335245	0.328	0.336	1	6	transcription_factor_E3-like
LOC121416207	0.239951	0.402214	0.254	0.238	1	6	tubulin_beta_chain-like
LOC121431809	0.255342	0.266302	0.196	0.257	1	6	ankyrin-2-like
LOC121411409	0.264604	0.46065	0.27	0.266	1	6	charged_multivesicular_body_protein_5-like
LOC121407258	0.276648	0.251326	0.683	0.744	1	6	development-specific_protein_LVN1.2-like
LOC121422447	0.284935	0.279877	0.28	0.369	1	6	LLGL_scribble_cell_polarity_complex_component_2-like
LOC121414262	0.302049	0.322578	0.296	0.282	1	6	uncharacterized_LOC121414262
LOC121405803	0.303382	0.275722	0.286	0.282	1	6	charged_multivesicular_body_protein_2a-like
LOC121424812	0.311918	0.502569	0.328	0.341	1	6	gamma-adducin-like
LOC121408960	0.32345	0.279269	0.328	0.337	1	6	uncharacterized_LOC121408960
LOC121422598	0.324911	0.277422	0.386	0.414	1	6	ras-related_protein_Rac1
[truncated: 561 more rows]
