# Supplementary material for: Genetically tractable embryonic cell lines from sea urchins
Source: Research Square preprint supplement (doi:10.21203/rs.3.rs-5665288/v1), 2025-01-15
Supplement: Supplementary file 9 [file b1081a928af537e157048972.xlsx]

## Sheet: M1
Table S1. Growth and viability of L. variegatus embryonic cells - Cultured in Marine Media M199 (M1)
Date	Experiment Day	Media	Cell state	Cell Counts (hemocytometer)				Average cell counts	Cells/ml	Number cells seeded	Total cells	Viability % live cells	Pop doubling	Cumulative population doubling
				Ch1	Ch2	Ch3	Ch4
Lv Blastula Cell Culture in M1 Media (Flask 1)
2021-02-14	3	M1	Live	74	71	81	73	74.75	1495000	2500000	7475000	99.0066	1.57923	1.58
			Dead	0	1	1	1	0.75					1.57923
2021-02-18	7	M1	Live	25	16	22	28	22.75	455000	3000000	2275000	86.6667	-0.398864	1.58
			Dead	3	1	3	7	3.5					-0.398864
Feb 22/21	11	M1	Live	1	0	2	2	1.25	25000	2275000	125000	9.25926	-4.18344	1.58
			Dead	9	14	12	14	12.25					-4.18344
Feb 26/21	15	M1	Live	0	0	1	0	0.25	5000	125000	25000	1.81818	-2.32058	1.58
			Dead	13	15	13	13	13.5					-2.32058
Lv Blastula Cell Culture in M1 Media (Flask 2)
2021-02-14	3	M1	Live	84	86	87	68	81.25	1625000	2500000	8125000	98.7842	1.69945	1.7
			Dead	1	1	1	1	1					1.69945
2021-02-18	7	M1	Live	20	21	28	21	22.5	450000	3000000	2250000	83.3333	-0.414797	1.7
			Dead	1	8	6	3	4.5					-0.414797
Feb 22/21	11	M1	Live	1	1	0	1	0.75	15000	2250000	75000	6.38298	-4.90404	1.7
			Dead	10	8	13	13	11			0		-4.90404
Feb 26/21	15	M1	Live	0	0	0	0	0	0	75000	0	0
			Dead	13	9	14	9	11.25

## Sheet: SOM
Table S1. Growth and viability of L. variegatus embryonic cells - Cultured in Supplemented Oyster Media (SOM)
Date	Experiment Day	Media	Cell state	Cell Counts (hemocytometer)				Average cell counts	Cells/ml	Number cells seeded	Total cells	Viability % live cells	Pop doubling	Cumulative population doubling
				Ch1	Ch2	Ch3	Ch4
Lv Blastula Cell Culture in SOM Media (Flask 1)
2021-02-14	3	SOM	Live	85	85	74	77	80.25	1605000	2500000	8025000	99.0741	1.6816	1.68
			Dead	0	1	1	1	0.75					1.6816
2021-02-18	7	SOM	Live	40	37	40	31	37	740000	3000000	3700000	91.358	0.302387	1.98398
			Dead	3	3	4	4	3.5					0.302387
Feb 22/21	11	SOM	Live	3	1	2	1	1.75	35000	3000000	175000	8.53659	-4.09716	1.98
			Dead	14	24	14	23	18.75					-4.09716
Feb 26/21	15	SOM	Live	1	0	0	0	0.25	5000	175000	25000	1.14943	-2.80573	1.98
			Dead	21	21	23	21	21.5					-2.80573
Lv Blastula Cell Culture in SOM Media (Flask 2)
2021-02-14	3	SOM	Live	88	78	81	72	79.75	1595000	2500000	7975000	99.0683	1.67259	1.67
			Dead	1	1	0	1	0.75					1.67259
2021-02-18	7	SOM	Live	21	24	23	26	23.5	470000	3000000	2350000	88.6792	-0.352097	1.67
			Dead	3	2	2	5	3					-0.352097
Feb 22/21	11	SOM	Live	13	6	6	11	9	180000	2350000	900000	66.6667	-1.38386	1.67
			Dead	4	2	1	11	4.5					-1.38386
Feb 26/21	15	SOM	Live	0	2	1	2	1.25	25000	900000	125000	6.57895	-2.84634	1.67
			Dead	16	18	26	11	17.75					-2.84634

## Sheet: UM 3% FBS
Table S1. Growth and viability of L. variegatus embryonic cells - Cultured in Urchin Media (UM) with 3% FBS
Date	Experiment Day	Media	Cell state	Cell Counts (hemocytometer)				Average cell counts	Cells/ml	Number cells seeded	Total cells	Viability % live cells	Pop doubling	Cumulative population doubling	Percent red cells
				Ch1	Ch2	Ch3	Ch4
Lv Blastula Cell Culture in Urchin Media (UM) with 3% FBS (Flask 1)
2021-02-14	3	UM+3%FBS	Live	57	56	46	59	54.5	1090000	2500000	5450000	99.0909	1.12368	1.12	0
			Dead	1	1	0	0	0.5					1.12368
			Red	1	0	0	0			3000000
2021-02-18	7	UM+3%FBS	Live	60	66	64	61	62.75	1255000	3000000	6275000	99.2095	1.06404	2.18771	1.19522
			Dead	0	1	1	0	0.5					1.06404
			Red	1	1	0	1	0.75
Feb 22/21	11	UM+3%FBS	Live	26	14	18	23	20.25	405000	3000000	2025000	95.2941	-0.566711	2.19	0
			Dead	1	0	0	3	1					-0.566711
			Red	0	0	0	0	0
Feb 26/21	15	UM+3%FBS	Live	14	17	18	14	15.75	315000	2025000	1575000	92.6471	-0.36236	2.19	1.5873
			Dead	3	0	1	1	1.25					-0.36236
			Red	0	0	1	0	0.25
Mar 2/21	19	UM+3%FBS	Live	15	7	6	10	9.5	190000	1575000	950000	84.4444	-0.728929	2.19	7.89474
			Dead	2	3	0	2	1.75					-0.728929
			Red	2	0	1	0	0.75
Mar 5/21	22	UM+3%FBS	Live	11	7	9	10	9.25	185000	950000	925000	72.549	-0.0384518	2.19	2.7027
			Dead	2	4	3	5	3.5					-0.0384518
			Red	0	1	0	0	0.25
Mar 16/21	33	UM+3%FBS	Live	16	23	16	15	17.5	350000	925000	1750000	80.4598	0.919296	3.1093	0
			Dead	4	4	5	4	4.25					0.919296
			Red	0	0	0	0	0
Mar 23/21	40	UM+3%FBS	Live	15	14	10	16	13.75	275000	1750000	1375000	84.6154	-0.347721	3.11	0
			Dead	2	3	2	3	2.5					-0.347721
			Red	0	0	0	0	0
Mar 30/21	47	UM+3%FBS	Live	7	6	10	8	7.75	155000	1750000	775000	81.5789	-1.1744	3.11	0
			Dead	1	3	1	2	1.75					-1.1744
			Red	0	0	0	0	0
April 6/21	54	UM+3%FBS	Live	10	13	15	15	13.25	265000	775000	1325000	82.8125	0.773275	3.88328	1.88679
			Dead	4	3	2	2	2.75					0.773275
			Red	0	0	1	0	0.25
April 13/21	61	UM+3%FBS	Live	13	15	11	13	13	260000	1325000	1430000	91.2281	0.109959	3.99323	0
			Dead	2	1	1	1	1.25					0.109959
			Red	0	0	0	0	0
April 20/21	68	UM+3%FBS	Live	21	23	14	19	19.25	385000	1430000	2117500	90.5882	0.566018	4.55925	2.5974
			Dead	2	1	3	2	2					0.566018
			Red	2	0	0	0	0.5
April 27/21	75	UM+3%FBS	Live	25	22	26	24	24.25	485000	2117500	2667500	90.6542	0.332933	4.89219	1.03093
			Dead	3	1	3	3	2.5					0.332933
			Red	0	0	0	1	0.25
May 4/21	82	UM+3%FBS	Live	30	31	34	40	33.75	675000	2667500	3375000	91.8367	0.339202	5.23139	0
			Dead	3	2	3	4	3					0.339202
			Red	0	0	0	0	0		replated
May 11/21	89	UM+3%FBS	Live	24	21	19	24	22	440000	2025000	2200000	94.6237	0.119512	5.3509	1.13636
			Dead	1	2	1	1	1.25					0.119512
			Red	0	0	1	0	0.25
May 18/21	96	UM+3%FBS	Live	39	46	54	63	50.5	1010000	2200000	5050000	92.6606	1.19808	6.54898	0.990099
			Dead	2	3	6	5	4					1.19808
			Red	0	1	0	1	0.5		replated
May 21/21	99	UM+3%FBS	Live	40	34	45	35	38.5	770000	3030000	3850000	92.7711	0.34534	6.89432	0
			Dead	4	2	3	3	3					0.34534
			Red	0	0	0	0	0
May 25/21	103	UM+3%FBS	Live	23.5	25.5	21.5	20	22.625	452500	3850000	4525000	95.7672	0.232924	7.12725	0
			Dead	1	3	0	0	1					0.232924
			Red	0	0	0	0	0
May 28/21	106	UM+3%FBS	Live	33	33	36	39	35.25	705000	4525000	7050000	94.6309	0.639334	7.76658	1.41844
			Dead	1	2	0	5	2					0.639334
			Red	0	1	1	0	0.5		replated
June 1/21	110	UM+3%FBS	Live	40	42	45	41	42	840000	5640000	7560000	93.8547	0.422446	8.18903	0
			Dead	2	3	3	3	2.75					0.422446
			Red	0	0	0	0	0		replated
June 4/21	113	UM+3%FBS	Live	46	35	28	48	39.25	785000	5544000	7850000	95.7317	0.501474	8.6905	0
			Dead	2	1	2	2	1.75					0.501474
			Red	0	0	0	0	0
June 8/21	117	UM+3%FBS	Live	33	19	30	33	28.75	575000	5181000	9775000	95.0413	0.915335	9.60584	0.869565
			Dead	3	1	1	1	1.5					0.915335
			Red	0	0	1	0	0.25
June 11/21	120	UM+3%FBS	Live	35	21	34	18	27	540000	7500000	8100000	88.5246	0.110967	9.7168	1.85185
			Dead	6	3	1	4	3.5					0.110967
			Red	1	1	0	0	0.5
June 15/21	124	UM+3%FBS	Live	28	19	36	34	29.25	585000	8100000	8775000	91.4062	0.11541	9.83221	0
			Dead	2	2	3	4	2.75					0.11541
			Red	0	0	0	0	0
June 22/21	131	UM+3%FBS	Live	21	21	23	22	21.75	435000	8775000	6525000	83.6538	-0.427173	9.83221	1.14943
			Dead	1	4	7	5	4.25					-0.427173
			Red	0	1	0	0	0.25
June 29/21	138	UM+3%FBS	Live	13	15	9	16	13.25	265000	6525000	3975000	84.127	-0.714608	9.83221	7.54717
			Dead	2	4	1	3	2.5					-0.714608
			Red	1	3	0	0	1
July 6/21	145	UM+3%FBS	Live	18	15	11	10	13.5	270000	3975000	4050000	75	0.0269514	9.85916	1.85185
			Dead	5	5	4	4	4.5					0.0269514
			Red	0	0	1	0	0.25
July 13/21	152	UM+3%FBS	Live	33	40	33	41	36.75	735000	4050000	7350000	85.9649	0.859323	10.7185	0
			Dead	10	6	3	5	6					0.859323
			Red	0	0	0	0	0
July 20/21	159	UM+3%FBS	Live	182	183	162	161	172	3440000	3000000	17200000	95.1591	2.51791	13.2364	0
			Dead	9	10	9	7	8.75					2.51791
			Red	0	0	0	0	0
July 27/21	166	UM+3%FBS	Live	28	24	29	20	25.25	505000	9000000	7575000	89.3805	-0.248535	13.24	0
			Dead	1	5	3	3	3					-0.248535
			Red	0	0	0	0	0
Aug 3/21	173	UM+3%FBS	Live	35	45	32	43	38.75	775000	6000000	7750000	81.1518	0.36902	13.609	0
			Dead	7	7	13	9	9					0.36902
			Red	0	0	0	0	0
Aug 10/21	180	UM+3%FBS	Live	19	17	26	19	20.25	405000	6000000	4050000	72.973	-0.566711	13.609	0
			Dead	2	10	7	11	7.5					-0.566711
			Red	0	0	0	0	0
Aug 17/21	187	UM+3%FBS	Live	77	61	70	64	68	1360000	3000000	6800000	77.4929	1.17989	14.7889	0.735294
			Dead	11	20	23	25	19.75					1.17989
			Red	1	1	0	0	0.5
Aug 26/21	196	UM+3%FBS	Live	62	62	61	61	61.5	1230000	3000000	6150000	86.3158	1.03502	15.8239	2.43902
			Dead	8	7	7	17	9.75					1.03502
			Red	1	4	1	0	1.5
Sept 7/21	208	UM+3%FBS	Live	31	27	26	24	27	540000	3000000	2700000	61.3636	-0.151915	15.8239	0
			Dead	8	23	20	17	17					-0.151915
			Red	0	0	0	0	0
Sept 14/21	215	UM+3%FBS	Live	71	33	64	62	57.5	1150000	2700000	5750000	78.4983	1.08997	16.9139	0
			Dead	18	7	19	19	15.75					1.08997
			Red	0	0	0	0	0
Sept 21/21	222	UM+3%FBS	Live	64	44	46	49	50.75	1015000	3000000	5075000	68.1208	0.758005	17.6719	0.492611
			Dead	21	23	23	28	23.75					0.758005
			Red	1	0	0	0	0.25
Sept 28/21	229	UM+3%FBS	Live	67	62	68	63	65	1300000	3000000	6500000	66.4962	1.11483	18.7867	0
			Dead	36	31	31	33	32.75					1.11483
			Red	0	0	0	0	0
Oct 5/21	236	UM+3%FBS	Live	50	36	25	40	37.75	755000	3000000	3775000	66.2281	0.331322	19.1181	0.662252
			Dead	26	19	12	20	19.25					0.331322
			Red	0	0	0	1	0.25
Oct 12/21	243	UM+3%FBS	Live	37	32	29	30	32	640000	3000000	3200000	58.9862	0.0930554	19.2111	0.78125
			Dead	24	19	24	22	22.25					0.0930554
			Red	1	0	0	0	0.25
Oct 19/21	250	UM+3%FBS	Live	52	36	38	39	41.25	825000	3000000	4125000	70.2128	0.459165	19.6703	0
			Dead	16	17	21	16	17.5					0.459165
			Red	0	0	0	0	0
Oct 26/21	257	UM+3%FBS	Live	31	30	36	34	32.75	655000	3000000	3275000	55.9829	0.126459	19.7967	0
			Dead	22	22	25	34	25.75					0.126459
			Red	0	0	0	0	0
Nov 2/21	264	UM+3%FBS	Live	55	39	44	41	44.75	895000	3000000	4475000	62.807	0.57659	20.3733	0.558659
			Dead	32	31	25	18	26.5					0.57659
			Red	0	0	0	1	0.25
Nov 9/21	271	UM+3%FBS	Live	56	48	55	45	51	1020000	3000000	5100000	66.4495	0.76509	21.1384	0
			Dead	23	24	20	36	25.75					0.76509
			Red	0	0	0	0	0
Nov 17/21	279	UM+3%FBS	Live	57	74	50	50	57.75	1155000	3000000	5775000	68.75	0.94431	22.0827	0.865801
			Dead	28	27	25	25	26.25					0.94431
			Red	0	1	0	1	0.5
Nov 23/21	285	UM+3%FBS	Live	40	26	44	23	33.25	665000	3000000	3325000	59.375	0.148306	22.231	2.25564
			Dead	30	20	19	22	22.75					0.148306
			Red	0	0	2	1	0.75
Nov 30/21	292	UM+3%FBS	Live	29	41	22	33	31.25	625000	3000000	3125000	55.5556	0.0588595	22.2899	0.8
			Dead	33	16	25	26	25					0.0588595
			Red	0	1	0	0	0.25
Dec 7/21	299	UM+3%FBS	Live	54	54	51	47	51.5	1030000	3000000	5150000	68.4385	0.779157	23.069	0
			Dead	22	19	23	31	23.75					0.779157
			Red	0	0	0	0	0
Dec 14/21	306	UM+3%FBS	Live	55	59	44	48	51.5	1030000	3000000	5150000	69.1275	0.779157	23.8482	0
			Dead	18	30	23	21	23					0.779157
			Red	0	0	0	0	0
Dec 21/21	313	UM+3%FBS	Live	50	42	36	39	41.75	835000	3000000	4175000	60.7273	0.476537	24.3247	0
			Dead	30	33	22	23	27					0.476537
			Red	0	0	0	0	0
Dec 28/21	320	UM+3%FBS	Live	55	52	41	40	47	940000	3000000	4700000	72.5869	0.647322	24.9721	0.531915
			Dead	16	11	24	20	17.75					0.647322
			Red	1	0	0	0	0.25
Jan 4/22	327	UM+3%FBS	Live	58	86	91	93	82	1640000	3000000	8200000	94.5245	1.44982	26.4219	28.9634
			Dead	5	6	5	3	4.75					1.44982
			Red	20	26	31	18	23.75
Jan 11/22	334	UM+3%FBS	Live	28	24	25	24	25.25	505000	3000000	2525000	61.9632	-0.248535	26.4219	0
			Dead	15	20	14	13	15.5					-0.248535
			Red	0	0	0	0	0
Jan 18/22	341	UM+3%FBS	Live	47	41	35	43	41.5	830000	2525000	4150000	72.807	0.716412	27.1383	0.60241
			Dead	17	19	10	16	15.5					0.716412
			Red	0	0	1	0	0.25
Jan 25/22	348	UM+3%FBS	Live	90	101	99	95	96.25	1925000	3000000	9625000	99.2268	1.68085	28.8191	25.4545
			Dead	3	0	0	0	0.75					1.68085
			Red	15	18	39	26	24.5
Feb 1/22	355	UM+3%FBS	Live	56	62	62	58	59.5	1190000	3000000	5950000	92.607	0.987354	29.8065	0
			Dead	4	5	5	5	4.75					0.987354
			Red	0	0	0	0	0
Feb 8/22	362	UM+3%FBS	Live	48	33	45	42	42	840000	3000000	4200000	91.3043	0.485145	30.2916	0
			Dead	3	4	4	5	4					0.485145
			Red	0	0	0	0	0
Feb 15/22	369	UM+3%FBS	Live	37	50	34	41	40.5	810000	3000000	4050000	93.1034	0.432708	30.7244	0
			Dead	2	5	2	3	3					0.432708
			Red	0	0	0	0	0
Feb 22/22	376	UM+3%FBS	Live	77	65	61	50	63.25	1265000	3000000	6325000	92	1.07548	31.7998	0
			Dead	5	6	5	6	5.5					1.07548
			Red	0	0	0	0	0
Mar 1/22	383	UM+3%FBS	Live	55	50	62	60	56.75	1135000	3000000	5675000	89.0196	0.919124	32.719	0
			Dead	9	6	8	5	7					0.919124
			Red	0	0	0	0	0
Mar 8/22	390	UM+3%FBS	Live	25	36	33	31	31.25	625000	3000000	3125000	83.3333	0.0588595	32.7778	0
			Dead	7	7	6	5	6.25					0.0588595
			Red	0	0	0	0	0
Mar 15/22	397	UM+3%FBS	Live	44	35	36	34	37.25	745000	3000000	3725000	87.6471	0.312097	33.0899	0.671141
			Dead	6	5	3	7	5.25					0.312097
			Red	0	1	0	0	0.25
Mar 22/22	404	UM+3%FBS	Live	48	42	48	48	46.5	930000	3000000	4650000	86.1111	0.631901	33.7218	0
			Dead	8	8	6	8	7.5					0.631901
			Red	0	0	0	0	0
Mar 25/22	407	UM+3%FBS	Live					#DIV/0!	#DIV/0!	3000000	#DIV/0!	86.1111	#DIV/0!	33.7218	#DIV/0!
			Dead					#DIV/0!					#DIV/0!
			Red					#DIV/0!
Mar 28/22	410	UM+3%FBS	Live	41	47	38	48	43.5	870000	3000000	4350000	90.1554	0.535742	34.2576	0
			Dead	2	4	8	5	4.75					0.535742
			Red	0	0	0	0	0
Apr 5/22	418	UM+3%FBS	Live	55	38	40	36	42.25	845000	3000000	4225000	85.3535	0.493702	34.7513	0
			Dead	7	9	6	7	7.25					0.493702
			Red	0	0	0	0	0
Apr 12/22	425	UM+3%FBS	Live	44	38	42	41	41.25	825000	3000000	4125000	92.6966	0.459165	35.2104	0
			Dead	3	3	3	4	3.25					0.459165
			Red	0	0	0	0	0
Apr 19/22	432	UM+3%FBS	Live	46	64	57	55	55.5	1110000	3000000	5550000	94.0678	0.88701	36.0974	0
			Dead	3	4	2	5	3.5					0.88701
			Red	0	0	0	0	0
Apr 26/22	439	UM+3%FBS	Live	50	48	48	38	46	920000	3000000	4600000	91.5423	0.616313	36.7137	0
			Dead	3	4	4	6	4.25					0.616313
			Red	0	0	0	0	0
May 3/22	446	UM+3%FBS	Live	60	56	45	52	53.25	1065000	3000000	5325000	87.6543	0.827339	37.5411	0
			Dead	5	10	9	6	7.5					0.827339
			Red	0	0	0	0	0
May 10/22	453	UM+3%FBS	Live	50	44	43	45	45.5	910000	3000000	4550000	81.982	0.600555	38.1416	0
			Dead	3	12	14	11	10					0.600555
			Red	0	0	0	0	0
May 17/22	460	UM+3%FBS	Live	50	48	48	53	49.75	995000	3000000	4975000	85.0427	0.72931	38.8709	0
			Dead	7	10	10	8	8.75					0.72931
			Red	0	0	0	0	0
May 24/22	467	UM+3%FBS	Live	53	47	52	52	51	1020000	3000000	5100000	89.8678	0.76509	39.636	0
			Dead	4	5	6	8	5.75					0.76509
			Red	0	0	0	0	0
May31/22	474	UM+3%FBS	Live	45	43	39	38	41.25	825000	3000000	4125000	87.766	0.459165	40.0952	0
			Dead	5	5	6	7	5.75					0.459165
			Red	0	0	0	0	0
Jun7/22	481	UM+3%FBS	Live	48	45	34	47	43.5	870000	3000000	4350000	93.0481	0.535742	40.6309	0
			Dead	4	4	3	2	3.25					0.535742
			Red	0	0	0	0	0
Jun14/22	488	UM+3%FBS	Live	34	41	36	43	38.5	770000	3000000	3850000	89.0173	0.359687	40.9906	0
			Dead	4	5	3	7	4.75					0.359687
			Red	0	0	0	0	0
Jun21/22	495	UM+3%FBS	Live	30	36	32	34	33	660000	3000000	3300000	85.7143	0.137424	41.1281	0
			Dead	3	8	6	5	5.5					0.137424
			Red	0	0	0	0	0
Jun28/22	502	UM+3%FBS	Live	36	36	46	36	38.5	770000	3000000	3850000	91.1243	0.359687	41.4877	0
			Dead	3	3	2	7	3.75					0.359687
			Red	0	0	0	0	0
July 5/22	509	UM+3%FBS	Live	50	48	61	48	51.75	1035000	3000000	5175000	88.0851	0.78614	42.2739	0
			Dead	5	6	10	7	7					0.78614
			Red	0	0	0	0	0
July 12/22	516	UM+3%FBS	Live	41	42	33	36	38	760000	3000000	3800000	81.7204	0.340839	42.6147	0
			Dead	6	5	12	11	8.5					0.340839
			Red	0	0	0	0	0
July 19/22	523	UM+3%FBS	Live	49	50	44	45	47	940000	3000000	4700000	84.6847	0.647322	43.262	0
			Dead	9	8	9	8	8.5					0.647322
			Red	0	0	0	0	0
July 26/22	530	UM+3%FBS	Live	60	33	44	51	47	940000	3000000	4700000	83.9286	0.647322	43.9094	0
			Dead	7	12	7	10	9					0.647322
			Red	0	0	0	0	0
Aug 2/22	537	UM+3%FBS	Live	53	46	41	47	46.75	935000	3000000	4675000	85.7798	0.639632	44.549	0
			Dead	6	10	7	8	7.75					0.639632
			Red	0	0	0	0	0
Aug 9/22	543	UM+3%FBS	Live	53	41	44	39	44.25	885000	3000000	4425000	85.0962	0.56039	45.1094	0
			Dead	5	6	13	7	7.75					0.56039
			Red	0	0	0	0	0
Aug 16/22	550	UM+3%FBS	Live	58	63	54	51	56.5	1130000	3000000	5650000	83.7037	0.912758	46.0221	0
			Dead	10	15	6	13	11					0.912758
			Red	0	0	0	0	0
Aug 23/22	557	UM+3%FBS	Live	64	97	108	88	89.25	1785000	3000000	8925000	81.6934	1.57198	47.5941	0
			Dead	30	18	17	15	20					1.57198
			Red	0	0	0	0	0
Aug 30/22	564	UM+3%FBS	Live	53	46	54	53	51.5	1030000	3000000	5150000	87.2881	0.779157	48.3733	0
			Dead	7	9	9	5	7.5					0.779157
			Red	0	0	0	0	0
Sept 6/22	571	UM+3%FBS	Live	62	58	49	40	52.25	1045000	3000000	5225000	81.6406	0.800004	49.1733	0
			Dead	5	10	20	12	11.75					0.800004
			Red	0	0	0	0	0
Sept 13/22	578	UM+3%FBS	Live	62	52	66	63	60.75	1215000	3000001	6075000	94.5525	1.01733	50.1906	0
			Dead	3	4	4	3	3.5					1.01733
			Red	0	0	0	0	0
Sept 20/22	585	UM+3%FBS	Live	93	103	89	101	96.5	1930000	3000002	9650000	98.2188	1.68459	51.8752	0
			Dead	3	1	2	1	1.75					1.68459
			Red	0	0	0	0	0
Sept 27/22	592	UM+3%FBS	Live	75	81	65	73	73.5	1470000	3000003	7350000	97.0297	1.29203	53.1672	0
			Dead	3	1	3	2	2.25					1.29203
			Red	0	0	0	0	0
Oct 4/22	599	UM+3%FBS	Live	40	60	74	59	58.25	1165000	3000004	5825000	85.0365	0.956738	54.124	0
			Dead	17	6	11	7	10.25					0.956738
			Red	0	0	0	0	0

## Sheet: UM 3-5% FBS
Table S1. Growth and viability of L. variegatus embryonic cells - Cultures started in UM + 3% FBS and changed into UM + 5% FBS at Day 250
Date	Experiment Day	Media	Cell state	Cell Counts (hemocytometer)				Average cell counts	Cells/ml	Number cells seeded	Total cells	Viability % live cells	Pop doubling	Cumulative population doubling	Percent red cells
				Ch1	Ch2	Ch3	Ch4
Lv Blastula Cell Culture in Urchin Media (UM) with 3% FBS (Flask 2). Changed into UM with 5% FBS at Day 250
2021-02-14	3	UM+3%FBS	Live	51	54	68	54	56.75	1135000	2500000	5675000	100	1.18201	1.18	5.72687
			Dead	0	0	0	0	0					1.18201
			Red	2	3	2	6	3.25
2021-02-18	7	UM+3%FBS	Live	65	84	79	88	79	1580000	3000000	7900000	99.0596	1.39608	2.57809	1.89873
			Dead	1	0	1	1	0.75					1.39608
			Red	1	1	2	2	1.5
Feb 22/21	11	UM+3%FBS	Live	37	35	44	41	39.25	785000	3000000	3925000	89.7143	0.387505	2.96559	1.91083
			Dead	0	2	5	11	4.5					0.387505
			Red	1	2	0	0	0.75
Feb 26/21	15	UM+3%FBS	Live	26	26	30	25	26.75	535000	3000000	2675000	92.2414	-0.165328	2.97	1.86916
			Dead	0	2	3	4	2.25					-0.165328
			Red	1	0	0	1	0.5
Mar 2/21	19	UM+3%FBS	Live	16	13	13	11	13.25	265000	2675000	1325000	79.1045	-1.01296	2.97	0
			Dead	4	3	3	4	3.5					-1.01296
			Red	0	0	0	0	0
Mar 5/21	22	UM+3%FBS	Live	15	9	8	10	10.5	210000	1325000	1050000	61.7647	-0.335408	2.97	0
			Dead	5	10	4	7	6.5					-0.335408
			Red	0	0	0	0	0
Mar 16/21	33	UM+3%FBS	Live	20	18	23	23	21	420000	1050000	2100000	80.7692	0.99942	3.96942	0
			Dead	2	5	7	6	5					0.99942
			Red	0	0	0	0	0
Mar 23/21	40	UM+3%FBS	Live	20	15	20	22	19.25	385000	2100000	1925000	82.7957	-0.125458	3.97	0
			Dead	2	1	3	10	4					-0.125458
			Red	0	0	0	0	0
Mar 30/21	47	UM+3%FBS	Live	14	21	16	9	15	300000	1925000	1500000	89.5522	-0.359687	3.97	0
			Dead	1	1	3	2	1.75					-0.359687
			Red	0	0	0	0	0
April 6/21	54	UM+3%FBS	Live	21	19	16	15	17.75	355000	1500000	1775000	87.6543	0.242716	4.21272	0
			Dead	3	2	3	2	2.5					0.242716
			Red	0	0	0	0	0
April 13/21	61	UM+3%FBS	Live	16	18	23	19	19	380000	1775000	1900000	90.4762	0.0981234	4.31084	0
			Dead	1	2	4	1	2					0.0981234
			Red	0	0	0	0	0
April 20/21	68	UM+3%FBS	Live	16	17	17	23	18.25	365000	1900000	1825000	91.25	-0.0580692	4.31	0
			Dead	0	2	2	3	1.75					-0.0580692
			Red	0	0	0	0	0
April 27/21	75	UM+3%FBS	Live	29	22	24	19	23.5	470000	1825000	2350000	89.5238	0.364553	4.67455	1.06383
			Dead	3	3	3	2	2.75					0.364553
			Red	1	0	0	0	0.25
May 4/21	82	UM+3%FBS	Live	26	28	26	20	25	500000	2350000	2500000	92.5926	0.0892155	4.76377	#DIV/0!
			Dead	4	2	2	0	2					0.0892155
			Red					#DIV/0!		replated:
May 11/21	89	UM+3%FBS	Live	24	20	22	21	21.75	435000	2100000	2175000	95.6044	0.0505967	4.81436	5.74713
			Dead	2	0	1	1	1					0.0505967
			Red	1	1	1	2	1.25
May 18/21	96	UM+3%FBS	Live	21	28	36	37	30.5	610000	2175000	3050000	92.4242	0.487511	5.30188	5.7377
			Dead	1	1	3	5	2.5					0.487511
			Red	3	1	3	0	1.75		replated:
May 25/21	103	UM+3%FBS	Live	14	20	20	16	17.5	350000	1830000	1750000	93.3333	-0.0644513	5.3	#DIV/0!
			Dead	0	2	2	1	1.25					-0.0644513
			Red					#DIV/0!
May 28/21	106	UM+3%FBS	Live	16	13	17	19	16.25	325000	1050000	1625000	95.5882	0.629685	5.92968	0
			Dead	1	0	1	1	0.75					0.629685
			Red	0	0	0	0	0
June 1/21	110	UM+3%FBS	Live	19	24	25	21	22.25	445000	1625000	2225000	90.8163	0.453102	6.38279	2.24719
			Dead	2	2	3	2	2.25					0.453102
			Red	0	1	0	1	0.5		replated:
June 4/21	113	UM+3%FBS	Live	22	21	21	20	21	420000	2225000	2100000	72.4138	-0.0833676	6.38279	2.38095
			Dead	6	10	10	6	8					-0.0833676
			Red	0	0	1	1	0.5
June 8/21	117	UM+3%FBS	Live	32	18	21	35	26.5	530000	2100000	2650000	77.9412	0.335408	6.7182	4.71698
			Dead	5	12	5	8	7.5					0.335408
			Red	2	0	1	2	1.25
June 11/21	120	UM+3%FBS	Live	29	31	23	30	28.25	565000	2650000	2825000	76.8707	0.092205	6.8104	0
			Dead	6	10	7	11	8.5					0.092205
			Red	0	0	0	0	0
June 15/21	124	UM+3%FBS	Live	44	46	46	50	46.5	930000	2825000	4650000	88.1517	0.718563	7.52896	1.6129
			Dead	5	6	7	7	6.25					0.718563
			Red	1	0	2	0	0.75
June 22/21	131	UM+3%FBS	Live	34	39	40	37	37.5	750000	4650000	7500000	89.2857	0.68926	8.21822	2.66667
			Dead	3	4	5	6	4.5					0.68926
			Red	1	1	2	0	1
June 29/21	138	UM+3%FBS	Live	46	49	45	36	44	880000	7500000	8800000	84.6154	0.230479	8.4487	0
			Dead	6	8	9	9	8					0.230479
			Red	0	0	0	0	0
July 6/21	145	UM+3%FBS	Live	54	48	55	50	51.75	1035000	6000000	10350000	83.8057	0.78614	9.23484	0
			Dead	7	9	9	15	10					0.78614
			Red	0	0	0	0	0
July 13/21	152	UM+3%FBS	Live	34	22	24	16	24	480000	6000000	4800000	72.1805	-0.321741	9.15	1.04167
			Dead	8	10	9	10	9.25					-0.321741
			Red	0	0	1	0	0.25
July 20/21	159	UM+3%FBS	Live	30	20	24	38	28	560000	4800000	5600000	81.1594	0.222263	9.37226	0.892857
			Dead	5	7	5	9	6.5					0.222263
			Red	1	0	0	0	0.25
July 27/21	166	UM+3%FBS	Live	59	34	37	38	42	840000	5600000	8400000	87.5	0.584623	9.95689	0.595238
			Dead	3	9	7	5	6					0.584623
			Red	1	0	0	0	0.25
Aug 3/21	173	UM+3%FBS	Live	51	43	53	56	50.75	1015000	6000000	10150000	79.6078	0.758005	10.7149	1.47783
			Dead	11	13	15	13	13					0.758005
			Red	0	0	2	1	0.75
Aug 10/21	180	UM+3%FBS	Live	41	40	31	30	35.5	710000	6000000	7100000	75.5319	0.242716	10.9576	2.11268
			Dead	11	10	11	14	11.5					0.242716
			Red	0	3	0	0	0.75
Aug 17/21	187	UM+3%FBS	Live	12	18	21	12	15.75	315000	3000000	1575000	50.4	-0.929071	10.9576	3.1746
			Dead	19	15	14	14	15.5					-0.929071
			Red	0	0	1	1	0.5
Aug 26/21	196	UM+3%FBS	Live	23	17	13	15	17	340000	1575000	1700000	57.6271	0.110119	11.0677	2.94118
			Dead	7	14	15	14	12.5					0.110119
			Red	0	1	0	1	0.5
Sept 7/21	208	UM+3%FBS	Live	26	29	33	40	32	640000	1700000	3200000	64.3216	0.912008	11.9797	0.78125
			Dead	19	17	13	22	17.75					0.912008
			Red	0	0	0	1	0.25
Sept 14/21	215	UM+3%FBS	Live	37	39	31	23	32.5	650000	3000000	3250000	58.0357	0.11541	12.0951	2.30769
			Dead	22	24	24	24	23.5					0.11541
			Red	0	0	2	1	0.75
Sept 21/21	222	UM+3%FBS	Live	44	54	45	39	45.5	910000	3000000	4550000	71.3725	0.600555	12.6957	1.0989
			Dead	17	19	18	19	18.25					0.600555
			Red	1	1	0	0	0.5
Sept 28/21	229	UM+3%FBS	Live	58	46	52	50	51.5	1030000	3000000	5150000	65.3968	0.779157	13.4749	1.45631
			Dead	24	29	34	22	27.25					0.779157
			Red	0	1	2	0	0.75
Oct 5/21	236	UM+3%FBS	Live	16	14	27	16	18.25	365000	3000000	1825000	45.0617	-0.71665	13.4749	1.36986
			Dead	25	12	26	26	22.25					-0.71665
			Red	0	0	1	0	0.25
Oct 12/21	243	UM+3%FBS	Live	15	11	19	15	15	300000	1825000	1500000	41.0959	-0.28277	13.4749	5
			Dead	17	18	27	24	21.5					-0.28277
			Red	1	1	0	1	0.75
Oct 19/21	250	UM+3%FBS	Live	10	7	7	10	8.5	170000	1500000	850000	24.1135	-0.818952	13.4749	0
			Dead	29	22	30	26	26.75					-0.818952
			Red	0	0	0	0	0
Oct 26/21	257	UM+5%FBS	Live	23	26	24	20	23.25	465000	1675000	2325000	72.093	0.472795	13.9477	1.07527
			Dead	7	10	10	9	9					0.472795
			Red	0	1	0	0	0.25
Nov 2/21	264	UM+5%FBS	Live	24	19	16	21	20	400000	2325000	2000000	59.7015	-0.217105	13.9477	1.25
			Dead	11	13	20	10	13.5					-0.217105
			Red	0	0	0	1	0.25
Nov 9/21	271	UM+5%FBS	Live	29	33	32	25	29.75	595000	2000000	2975000	73.0061	0.572557	14.5202	0
			Dead	10	7	16	11	11					0.572557
			Red	0	0	0	0	0
Nov 17/21	279	UM+5%FBS	Live	49	38	58	48	48.25	965000	2975000	4825000	84.2795	0.697234	15.2174	0.518135
			Dead	5	9	5	17	9					0.697234
			Red	1	0	0	0	0.25
Nov 23/21	285	UM+5%FBS	Live	52	53	59	70	58.5	1170000	3000000	5850000	87.6404	0.962915	16.1804	0
			Dead	4	7	9	13	8.25					0.962915
			Red	0	0	0	0	0
Nov 30/21	292	UM+5%FBS	Live	99	90	92	93	93.5	1870000	3000000	9350000	93.5	1.63905	17.8194	0.534759
			Dead	4	5	7	10	6.5					1.63905
			Red	1	1	0	0	0.5
Dec 7/21	299	UM+5%FBS	Live	42	30	47	51	42.5	850000	3000000	4250000	78.341	0.502209	18.3216	1.17647
			Dead	9	13	10	15	11.75					0.502209
			Red	0	0	2	0	0.5
Dec 14/21	306	UM+5%FBS	Live	44	34	38	31	36.75	735000	3000000	3675000	87.5	0.292612	18.6142	0.680272
			Dead	3	7	2	9	5.25					0.292612
			Red	0	0	1	0	0.25
Dec 21/21	313	UM+5%FBS	Live	42	50	53	41	46.5	930000	3000000	4650000	85.3211	0.631901	19.2461	2.15054
			Dead	6	10	4	12	8					0.631901
			Red	0	0	3	1	1
Dec 28/21	320	UM+5%FBS	Live	68	53	63	68	63	1260000	3000000	6300000	87.8049	1.06977	20.3159	1.98413
			Dead	4	13	10	8	8.75					1.06977
			Red	2	2	1	0	1.25
Jan 4/22	327	UM+5%FBS	Live	66	86	79	87	79.5	1590000	3000000	7950000	99.375	1.40518	21.7211	14.4654
			Dead	0	2	0	0	0.5					1.40518
			Red	11	16	8	11	11.5
Jan 11/22	334	UM+5%FBS	Live	73	70	73	68	71	1420000	3000000	7100000	93.7294	1.24214	22.9632	2.46479
			Dead	3	5	6	5	4.75					1.24214
			Red	2	1	2	2	1.75
Jan 18/22	341	UM+5%FBS	Live	55	56	63	64	59.5	1190000	3000000	5950000	96.3563	0.987354	23.9506	1.2605
			Dead	2	1	3	3	2.25					0.987354
			Red	1	0	1	1	0.75
Jan 25/22	348	UM+5%FBS	Live	60	43	47	59	52.25	1045000	3000000	5225000	99.5238	0.800004	24.7506	11.0048
			Dead	1	0	0	0	0.25					0.800004
			Red	6	4	6	7	5.75
Feb 1/22	355	UM+5%FBS	Live	109	79	101	118	101.75	2035000	3000000	10175000	96.6746	1.76097	26.5115	0.737101
			Dead	3	4	3	4	3.5					1.76097
			Red	0	0	1	2	0.75
Feb 8/22	362	UM+5%FBS	Live	44	44	51	53	48	960000	3000000	4800000	95.0495	0.677678	27.1892	3.125
			Dead	3	2	2	3	2.5					0.677678
			Red	0	2	3	1	1.5
Feb 15/22	369	UM+5%FBS	Live	50	34	39	46	42.25	845000	3000000	4225000	93.3702	0.493702	27.6829	2.95858
			Dead	3	4	4	1	3					0.493702
			Red	2	0	3	0	1.25
Feb 22/22	376	UM+5%FBS	Live	71	67	76	73	71.75	1435000	3000000	7175000	95.9866	1.25729	28.9402	2.09059
			Dead	2	4	3	3	3					1.25729
			Red	1	2	1	2	1.5
Mar 1/22	383	UM+5%FBS	Live	47	53	46	58	51	1020000	3000000	5100000	95.7746	0.76509	29.7053	1.96078
			Dead	2	3	2	2	2.25					0.76509
			Red	2	1	0	1	1
Mar 8/22	390	UM+5%FBS	Live	46	45	40	54	46.25	925000	3000000	4625000	97.3684	0.624128	30.3294	1.08108
			Dead	1	2	1	1	1.25					0.624128
			Red	1	0	1	0	0.5
Mar 15/22	397	UM+5%FBS	Live	35	44	50	34	40.75	815000	3000000	4075000	95.3216	0.441581	30.771	0.613497
			Dead	0	2	2	4	2					0.441581
			Red	1	0	0	0	0.25
Mar 22/22	404	UM+5%FBS	Live	53	52	40	50	48.75	975000	3000000	4875000	95.5882	0.700033	31.471	0.512821
			Dead	3	1	2	3	2.25					0.700033
			Red	0	0	0	1	0.25
Mar 25/22	407	UM+5%FBS	Live					#DIV/0!	#DIV/0!	3000000	#DIV/0!	95.5882	#DIV/0!	31.471	#DIV/0!
			Dead					#DIV/0!					#DIV/0!
			Red					#DIV/0!
Mar 28/22	410	UM+5%FBS	Live	45	49	53	60	51.75	1035000	3000000	5175000	96.2791	0.78614	32.2572	1.93237
			Dead	0	2	2	4	2					0.78614
			Red	0	3	1	0	1
Apr 5/22	418	UM+5%FBS	Live	45	56	45	56	50.5	1010000	3000000	5050000	94.8357	0.750885	33.0081	0.990099
			Dead	3	2	3	3	2.75					0.750885
			Red	0	2	0	0	0.5
Apr 12/22	425	UM+5%FBS	Live	56	54	66	47	55.75	1115000	3000000	5575000	91.3934	0.89349	33.9016	0
			Dead	1	4	6	10	5.25					0.89349
			Red	0	0	0	0	0
Apr 19/22	432	UM+5%FBS	Live	61	54	59	60	58.5	1170000	3000000	5850000	92.126	0.962915	34.8645	0.42735
			Dead	4	4	6	6	5					0.962915
			Red	0	0	0	1	0.25
Apr 26/22	439	UM+5%FBS	Live	39	59	56	56	52.5	1050000	3000000	5250000	88.9831	0.806886	35.6714	0.47619
			Dead	4	6	12	4	6.5					0.806886
			Red	0	1	0	0	0.25
May 3/22	446	UM+5%FBS	Live	49	36	50	53	47	940000	3000000	4700000	87.4419	0.647322	36.3187	1.59574
			Dead	8	7	6	6	6.75					0.647322
			Red	0	2	1	0	0.75
May 10/22	453	UM+5%FBS	Live	74	78	75	81	77	1540000	3000000	7700000	95.9502	1.35911	37.6778	1.62338
			Dead	3	4	2	4	3.25					1.35911
			Red	1	1	2	1	1.25
May 17/22	460	UM+5%FBS	Live	53	55	59	58	56.25	1125000	3000000	5625000	97.8261	0.906364	38.5841	0.444444
			Dead	0	1	1	3	1.25					0.906364
			Red	1	0	0	0	0.25
May 24/22	467	UM+5%FBS	Live	59	40	57	59	53.75	1075000	3000000	5375000	95.1327	0.840814	39.425	0.465116
			Dead	6	2	0	3	2.75					0.840814
			Red	0	1	0	0	0.25
May 31/22	474	UM+5%FBS	Live	48	38	48	63	49.25	985000	3000000	4925000	98.5	0.714746	40.1397	1.52284
			Dead	1	0	0	2	0.75					0.714746
			Red	0	1	2	0	0.75
Jun 7/22	481	UM+5%FBS	Live	52	56	59	59	56.5	1130000	3000000	5650000	98.2609	0.912758	41.0525	2.21239
			Dead	1	1	1	1	1					0.912758
			Red	1	2	2	0	1.25
Jun 14/22	488	UM+5%FBS	Live	94	78	72	78	80.5	1610000	3000000	8050000	95.549	1.4232	42.4757	0.310559
			Dead	3	3	5	4	3.75					1.4232
			Red	1	0	0	0	0.25
Jun 21/22	495	UM+5%FBS	Live	99	113	89	111	103	2060000	3000000	10300000	96.7136	1.77858	44.2542	1.45631
			Dead	1	1	7	5	3.5					1.77858
			Red	1	2	0	3	1.5
Jun 28/22	502	UM+5%FBS	Live	47	46	47	56	49	980000	3000000	4900000	97.0297	0.707408	44.9617	5.10204
			Dead	1	1	2	2	1.5					0.707408
			Red	4	2	0	4	2.5
July 5/22	509	UM+5%FBS	Live	86	70	75	94	81.25	1625000	3000000	8125000	98.1873	1.43657	46.3982	1.23077
			Dead	1	1	1	3	1.5					1.43657
			Red	1	0	1	2	1
July 12/22	516	UM+5%FBS	Live	47	47	48	51	48.25	965000	3000000	4825000	93.6893	0.685169	47.0834	1.5544
			Dead	1	5	3	4	3.25					0.685169
			Red	1	1	1	0	0.75
July 19/22	523	UM+5%FBS	Live	37	56	60	53	51.5	1030000	3000000	5150000	98.0952	0.779157	47.8626	1.45631
			Dead	1	0	1	2	1					0.779157
			Red	1	0	1	1	0.75
July 26/22	530	UM+5%FBS	Live	50	54	49	64	54.25	1085000	3000000	5425000	97.3094	0.854165	48.7167	2.76498
			Dead	0	1	3	2	1.5					0.854165
			Red	5	1	0	0	1.5
Aug 2/22	537	UM+5%FBS	Live	62	55	61	65	60.75	1215000	3000000	6075000	97.2	1.01733	49.734	1.64609
			Dead	2	1	3	1	1.75					1.01733
			Red	0	0	2	2	1
Aug 9/22	543	UM+5%FBS	Live	67	68	68	87	72.5	1450000	3000000	7250000	98.6395	1.27228	51.0063	0.689655
			Dead	0	2	1	1	1					1.27228
			Red	0	0	1	1	0.5
Aug 16/22	550	UM+5%FBS	Live	88	104	109	99	100	2000000	3000000	10000000	84.0336	1.73596	52.7423	0.75
			Dead	24	16	14	22	19					1.73596
			Red	0	1	2	0	0.75
Aug 23/22	557	UM+5%FBS	Live	106	87	127	92	103	2060000	3000000	10300000	85.6549	1.77858	54.5209	0.485437
			Dead	19	18	20	12	17.25					1.77858
			Red	0	2	0	0	0.5
Aug 30/22	564	UM+5%FBS	Live	103	93	111	104	102.75	2055000	3000000	10275000	99.0361	1.77507	56.2959	0.973236
			Dead	1	1	1	1	1					1.77507
			Red	0	2	0	2	1
Sept 6/22	571	UM+5%FBS	Live	72	101	98	112	95.75	1915000	3000000	9575000	96.7172	1.67334	57.9693	0.522193
			Dead	1	2	5	5	3.25					1.67334
			Red	0	2	0	0	0.5
Sept 13/22	578	UM+5%FBS	Live	67	81	88	94	82.5	1650000	3000000	8250000	97.6331	1.45858	59.4279	0.30303
			Dead	1	2	1	4	2					1.45858
			Red	0	0	1	0	0.25
Sep 20/22	585	UM+5%FBS	Live	100	89	97	87	93.25	1865000	3000001	9325000	98.1579	1.63519	61.063	0.268097
			Dead	1	1	2	3	1.75					1.63519
			Red	0	1	0	0	0.25
Sept 27/22	592	UM+5%FBS	Live	94	103	85	89	92.75	1855000	3000002	9275000	98.6702	1.62744	62.6905	0
			Dead	2	1	2	0	1.25					1.62744
			Red	0	0	0	0	0
Oct 4/22	599	UM+5%FBS	Live	138	119	129	109	123.75	2475000	3000003	12375000	69.7183	2.04321	64.7337	0
			Dead	59	49	61	46	53.75					2.04321
			Red	0	0	0	0	0

## Sheet: Cells-EB UM 3-5%FBS
Table S1. Growth and viability of L. variegatus embryonic cells - Size fractionated cultures seeded with single suspension cells (<40 um) or Embryoid bodies (>40 um)
Date	Experiment Day	Media	Cell state	Cell Counts (hemocytometer)				Average cell counts	Cells/ml	Number cells seeded	Total cells	Viability % live cells	Pop doubling	Cumulative population doubling	Percent red cells
				Ch1	Ch2	Ch3	Ch4
Lv Blastula Cell Culture in Urchin Media (UM) with 3% FBS - Suspension cell fraction that went through 40 um cell strainer used to seed a new culture on Day 152
July 20/21	159	UM+3%FBS	Live	28	26	29	20	25.75	515000	3300000	2575000	74.6377	-0.357686	10.7185	0.970874
			Dead	8	10	10	7	8.75					-0.357686
			Red	0	0	1	0	0.25
July 27/21	166	UM+3%FBS	Live	13	9	10	14	11.5	230000	2575000	1150000	42.5926	-1.16226	10.72	4.34783
			Dead	14	11	16	21	15.5					-1.16226
			Red	0	0	0	2	0.5
Aug 3/21	173	UM+3%FBS	Live	3	1	3	2	2.25	45000	1150000	225000	10.1124	-2.35227	10.72	0
			Dead	16	21	17	26	20					-2.35227
			Red	0	0	0	0	0
Aug 10/21	180	UM+3%FBS	Live	1	1	2	1	1.25	25000	1150000	125000	7.24638	-3.19978	10.72	20
			Dead	11	20	16	17	16					-3.19978
			Red	0	0	0	1	0.25
Aug 17/21	187	UM+3%FBS	Live	1	0	0	0	0.25	5000	125000	25000	0.970874	-2.32058	10.72	0
			Dead	38	22	18	24	25.5					-2.32058
			Red	0	0	0	0	0
Lv Blastula Cell Culture in Urchin Media (UM) with 3% FBS - Embryoid body and spheroid fraction > 40 um used to seed a new culture on Day 152 (changed into UM+5% FBS on Day 250)
July 20/21	159	UM+3%FBS	Live	36	39	23	44	35.5	710000	0	3550000	92.2078	#NUM!	10.72	0
			Dead	3	2	3	4	3					#DIV/0!
			Red	0	0	0	0	0
July 27/21	166	UM+3%FBS	Live	57	52	51	39	49.75	995000	3550000	4975000	88.8393	0.486595	11.2066	0
			Dead	8	3	4	10	6.25					0.486595
			Red	0	0	0	0	0
Aug 3/21	173	UM+3%FBS	Live	62	49	51	55	54.25	1085000	3000000	5425000	86.4542	0.854165	12.0608	0
			Dead	5	8	8	13	8.5					0.854165
			Red	0	0	0	0	0
Aug 10/21	180	UM+3%FBS	Live	35	20	33	34	30.5	610000	3000000	3050000	69.3182	0.0238329	12.0846	0
			Dead	16	10	14	14	13.5					0.0238329
			Red	0	0	0	0	0
Aug 17/21	187	UM+3%FBS	Live	28	33	36	36	33.25	665000	3000000	3325000	62.7358	0.148306	12.2329	0
			Dead	21	16	18	24	19.75					0.148306
			Red	0	0	0	0	0
Aug 26/21	196	UM+3%FBS	Live	34	51	39	33	39.25	785000	3000000	3925000	69.7778	0.387505	12.6204	1.91083
			Dead	19	16	13	20	17					0.387505
			Red	2	1	0	0	0.75
Sept 7/21	208	UM+3%FBS	Live	31	28	39	42	35	700000	3000000	3500000	61.9469	0.222263	12.8427	3.57143
			Dead	25	20	21	20	21.5					0.222263
			Red	0	1	1	3	1.25
Sept 14/21	215	UM+3%FBS	Live	54	49	37	44	46	920000	3000000	4600000	69.434	0.616313	13.459	1.63043
			Dead	8	23	23	27	20.25					0.616313
			Red	1	1	0	1	0.75
Sept 21/21	222	UM+3%FBS	Live	45	34	33	26	34.5	690000	3000000	3450000	57.9832	0.201517	13.6605	4.34783
			Dead	22	31	23	24	25					0.201517
			Red	1	1	1	3	1.5
Sept 28/21	229	UM+3%FBS	Live	74	110	103	95	95.5	1910000	3000000	9550000	67.1353	1.66957	15.3301	0.78534
			Dead	51	38	54	44	46.75					1.66957
			Red	3	0	0	0	0.75
Oct 5/21	236	UM+3%FBS	Live	21	20	29	21	22.75	455000	3000000	2275000	52.2989	-0.398864	15.3301	3.2967
			Dead	22	20	20	21	20.75					-0.398864
			Red	1	0	1	1	0.75
Oct 12/21	243	UM+3%FBS	Live	15	18	14	17	16	320000	2275000	1600000	51.6129	-0.5075	15.3301	3.125
			Dead	16	17	16	11	15					-0.5075
			Red	1	0	1	0	0.5
Oct 19/21	250	UM+3%FBS	Live	20	16	15	17	17	340000	1600000	1700000	55.7377	0.0874121	15.4175	0
			Dead	14	15	13	12	13.5					0.0874121
			Red	0	0	0	0	0
Oct 26/21	257	UM+5%FBS	Live	30	21	23	29	25.75	515000	1700000	2575000	69.1275	0.59869	16.0162	0.970874
			Dead	12	12	10	12	11.5					0.59869
			Red	0	0	0	1	0.25
Nov 2/21	264	UM+5%FBS	Live	41	37	49	41	42	840000	2575000	4200000	73.6842	0.705407	16.7216	1.19048
			Dead	20	12	14	14	15					0.705407
			Red	0	1	1	0	0.5
Nov 9/21	271	UM+5%FBS	Live	65	68	68	58	64.75	1295000	3000000	6475000	83.8188	1.10927	17.8308	0.3861
			Dead	4	14	15	17	12.5					1.10927
			Red	1	0	0	0	0.25
Nov 17/21	279	UM+5%FBS	Live	80	79	73	66	74.5	1490000	3000000	7450000	88.4273	1.31152	19.1424	0.33557
			Dead	5	8	15	11	9.75					1.31152
			Red	1	0	0	0	0.25
Nov 23/21	285	UM+5%FBS	Live	59	46	57	52	53.5	1070000	3000000	5350000	90.678	0.834092	19.9765	0.934579
			Dead	5	4	8	5	5.5					0.834092
			Red	0	1	1	0	0.5
Nov 30/21	292	UM+5%FBS	Live	75	81	81	85	80.5	1610000	3000000	8050000	94.9853	1.4232	21.3997	0.310559
			Dead	5	7	2	3	4.25					1.4232
			Red	0	0	1	0	0.25
Dec 7/21	299	UM+5%FBS	Live	67	51	53	66	59.25	1185000	3000000	5925000	85.8696	0.981283	22.3809	0
			Dead	6	6	11	16	9.75					0.981283
			Red	0	0	0	0	0
Dec 14/21	306	UM+5%FBS	Live	60	45	63	54	55.5	1110000	3000000	5550000	91.358	0.88701	23.2679	0.900901
			Dead	4	5	5	7	5.25					0.88701
			Red	0	2	0	0	0.5
Dec 21/21	313	UM+5%FBS	Live	74	65	58	60	64.25	1285000	3000000	6425000	89.8601	1.0981	24.366	0.389105
			Dead	3	8	6	12	7.25					1.0981
			Red	1	0	0	0	0.25
Dec 28/21	320	UM+5%FBS	Live	66	46	40	53	51.25	1025000	3000000	5125000	89.9123	0.772141	25.1382	0.487805
			Dead	4	4	10	5	5.75					0.772141
			Red	0	0	1	0	0.25
Jan 4/22	327	UM+5%FBS	Live	82	114	80	88	91	1820000	3000000	9100000	97.5871	1.59997	26.7382	23.0769
			Dead	3	0	3	3	2.25					1.59997
			Red	24	20	24	16	21
Jan 11/22	334	UM+5%FBS	Live	70	55	39	60	56	1120000	3000000	5600000	94.9153	0.899942	27.6381	0
			Dead	2	5	3	2	3					0.899942
			Red	0	0	0	0	0
Jan 18/22	341	UM+5%FBS	Live	100	93	93	107	98.25	1965000	3000000	9825000	97.2772	1.7105	29.3486	0
			Dead	3	2	3	3	2.75					1.7105
			Red	0	0	0	0	0
Jan 25/22	348	UM+5%FBS	Live	85	65	89	111	87.5	1750000	3000000	8750000	99.7151	1.54342	30.892	7.71429
			Dead	0	0	0	1	0.25					1.54342
			Red	10	3	7	7	6.75
Feb 1/22	355	UM+5%FBS	Live	85	93	84	106	92	1840000	3000000	9200000	96.0836	1.61573	32.5078	0
			Dead	3	5	3	4	3.75					1.61573
			Red	0	0	0	0	0
Feb 8/22	362	UM+5%FBS	Live	87	64	72	62	71.25	1425000	3000000	7125000	95.6376	1.2472	33.755	0
			Dead	2	4	3	4	3.25					1.2472
			Red	0	0	0	0	0
Feb 15/22	369	UM+5%FBS	Live	59	66	58	50	58.25	1165000	3000000	5825000	95.4918	0.95674	34.7117	0
			Dead	2	2	4	3	2.75					0.95674
			Red	0	0	0	0	0
Feb 22/22	376	UM+5%FBS	Live	85	87	102	108	95.5	1910000	3000000	9550000	97.6982	1.66957	36.3813	0
			Dead	2	2	3	2	2.25					1.66957
			Red	0	0	0	0	0
Mar 1/22	383	UM+5%FBS	Live	90	106	86	87	92.25	1845000	3000000	9225000	97.1053	1.61965	38.0009	0
			Dead	2	3	3	3	2.75					1.61965
			Red	0	0	0	0	0
Mar 8/22	390	UM+5%FBS	Live	35	32	48	41	39	780000	3000000	3900000	96.2963	0.378292	38.3792	0
			Dead	0	1	2	3	1.5					0.378292
			Red	0	0	0	0	0
Mar 15/22	397	UM+5%FBS	Live	38	42	37	38	38.75	775000	3000000	3875000	94.5122	0.36902	38.7482	0
			Dead	1	5	1	2	2.25					0.36902
			Red	0	0	0	0	0
Mar 22/22	404	UM+5%FBS	Live	53	52	58	64	56.75	1135000	3000000	5675000	93.8017	0.919124	39.6674	0
			Dead	3	5	2	5	3.75					0.919124
			Red	0	0	0	0	0
Mar 25/22	407	UM+5%FBS	Live					#DIV/0!	#DIV/0!	3000000	#DIV/0!	93.8017	#DIV/0!	39.6674	#DIV/0!
			Dead					#DIV/0!					#DIV/0!
			Red					#DIV/0!
Mar 28/22	410	UM+5%FBS	Live	97	76	112	100	96.25	1925000	3000000	9625000	92.1053	1.68085	41.3482	0
			Dead	6	11	9	7	8.25					1.68085
			Red	0	0	0	0	0
Apr 5/22	418	UM+5%FBS	Live	82	78	82	68	77.5	1550000	3000000	7750000	96.2733	1.36844	42.7166	0
			Dead	2	4	3	3	3					1.36844
			Red	0	0	0	0	0
Apr 12/22	425	UM+5%FBS	Live	117	118	131	100	116.5	2330000	3000000	11650000	94.9084	1.95616	44.6728	0
			Dead	6	4	7	8	6.25					1.95616
			Red	0	0	0	0	0
Apr 19/22	432	UM+5%FBS	Live	54	53	57	61	56.25	1125000	3000000	5625000	89.6414	0.906364	45.5792	0
			Dead	5	10	5	6	6.5					0.906364
			Red	0	0	0	0	0
Apr 26/22	439	UM+5%FBS	Live	66	51	66	67	62.5	1250000	3000000	6250000	89.2857	1.05828	46.6374	0
			Dead	7	6	9	8	7.5					1.05828
			Red	0	0	0	0	0
May 3/22	446	UM+5%FBS	Live	100	103	108	97	102	2040000	3000000	10200000	89.8678	1.76451	48.402	0
			Dead	4	10	19	13	11.5					1.76451
			Red	0	0	0	0	0
May 10/22	453	UM+5%FBS	Live	94	87	88	96	91.25	1825000	3000000	9125000	96.3061	1.60393	50.0059	0
			Dead	3	4	2	5	3.5					1.60393
			Red	0	0	0	0	0
May 17/22	460	UM+5%FBS	Live	52	60	55	57	56	1120000	3000000	5600000	99.115	0.899942	50.9058	0
			Dead	0	0	2	0	0.5					0.899942
			Red	0	0	0	0	0
May 24/22	467	UM+5%FBS	Live	56	63	65	66	62.5	1250000	3000000	6250000	93.633	1.05828	51.9641	0
			Dead	3	2	5	7	4.25					1.05828
			Red	0	0	0	0	0
May 31/22	474	UM+5%FBS	Live	43	60	58	62	55.75	1115000	3000000	5575000	96.9565	0.89349	52.8576	0
			Dead	0	1	2	4	1.75					0.89349
			Red	0	0	0	0	0
Jun7/22	481	UM+5%FBS	Live	52	72	64	62	62.5	1250000	3000000	6250000	98.8142	1.05828	53.9159	0
			Dead	0	0	2	1	0.75					1.05828
			Red	0	0	0	0	0
Jun14/22	488	UM+5%FBS	Live	119	114	120	105	114.5	2290000	3000000	11450000	92.9006	1.93119	55.8471	0
			Dead	11	10	7	7	8.75					1.93119
			Red	0	0	0	0	0
Jun21/22	495	UM+5%FBS	Live	63	67	68	83	70.25	1405000	3000000	7025000	96.2329	1.22682	57.0739	0
			Dead	2	4	2	3	2.75					1.22682
			Red	0	0	0	0	0
Jun28/22	502	UM+5%FBS	Live	66	49	51	52	54.5	1090000	3000000	5450000	96.8889	0.860794	57.9347	0
			Dead	2	3	1	1	1.75					0.860794
			Red	0	0	0	0	0
July 5/22	509	UM+5%FBS	Live	153	149	172	209	170.75	3415000	3000000	17075000	98.2734	2.50739	60.4421	0
			Dead	3	2	3	4	3					2.50739
			Red	0	0	0	0	0
July 12/22	516	UM+5%FBS	Live	55	74	74	74	69.25	1385000	3000000	6925000	97.193	1.20615	61.6482	0
			Dead	0	2	3	3	2					1.20615
			Red	0	0	0	0	0
July 19/22	523	UM+5%FBS	Live	43	50	41	43	44.25	885000	3000000	4425000	96.7213	0.56039	62.2086	0
			Dead	0	1	2	3	1.5					0.56039
			Red	0	0	0	0	0
July 26/22	530	UM+5%FBS	Live	62	55	52	52	55.25	1105000	3000000	5525000	95.2586	0.880501	63.0891	0
			Dead	3	3	0	5	2.75					0.880501
			Red	0	0	0	0	0
Aug 2/22	537	UM+5%FBS	Live	87	60	59	91	74.25	1485000	3000000	7425000	98.3444	1.30667	64.3958	0
			Dead	1	3	1	0	1.25					1.30667
			Red	0	0	0	0	0
Aug 9/22	543	UM+5%FBS	Live	79	74	86	78	79.25	1585000	3000000	7925000	99.0625	1.40064	65.7964	0
			Dead	1	0	2	0	0.75					1.40064
			Red	0	0	0	0	0
Aug 16/22	550	UM+5%FBS	Live	81	83	80	80	81	1620000	3000000	8100000	87.3315	1.43213	67.2286	0
			Dead	11	16	12	8	11.75					1.43213
			Red	0	0	0	0	0
Aug 23/22	557	UM+5%FBS	Live	141	143	170	129	145.75	2915000	3000000	14575000	88.3333	2.27914	69.5077	0
			Dead	19	22	21	15	19.25					2.27914
			Red	0	0	0	0	0
Aug 30/22	564	UM+5%FBS	Live	135	112	115	106	117	2340000	3000000	11700000	98.5263	1.96233	71.47	0
			Dead	1	2	0	4	1.75					1.96233
			Red	0	0	0	0	0
Sept 6/22	571	UM+5%FBS	Live	81	93	85	69	82	1640000	3000000	8200000	97.9104	1.44982	72.9198	0
			Dead	0	1	2	4	1.75					1.44982
			Red	0	0	0	0	0
Sept 13/22	578	UM+5%FBS	Live	67	94	74	70	76.25	1525000	3000001	7625000	97.1338	1.34499	74.2648	0
			Dead	4	3	1	1	2.25					1.34499
			Red	0	0	0	0	0
Sept 20/22	585	UM+5%FBS	Live	84	83	92	85	86	1720000	3000002	8600000	98.2857	1.51849	75.7833	0
			Dead	1	1	3	1	1.5					1.51849
			Red	0	0	0	0	0
Sept 27/22	592	UM+5%FBS	Live	102	96	89	79	91.5	1830000	3000003	9150000	98.3871	1.60787	77.3912	0
			Dead	3	2	0	1	1.5					1.60787
			Red	0	0	0	0	0
Oct 4/22	599	UM+5%FBS	Live	144	188	174	190	174	3480000	3000004	17400000	81.4988	2.53458	79.9258	0
			Dead	46	32	40	40	39.5					2.53458
			Red	0	0	0	0	0

## Sheet: UM 10% FBS
Table S1. Growth and viability of L. variegatus embryonic cells - Embryoid body seeded culture changed from UM+5%FBS to UM+10%FBS at Day 292 in culture
Date	Experiment Day	Media	Cell state	Cell Counts (hemocytometer)				Average cell counts	Cells/ml	Number cells seeded	Total cells	Viability % live cells	Pop doubling	Cumulative population doubling	Percent red cells
				Ch1	Ch2	Ch3	Ch4
Lv Blastula Cell Culture - Embryoid body seeded culture changed from UM+5%FBS to UM+10%FBS at Day 292 in culture
Nov 30/21	292	UM+10%FBS	Live					#DIV/0!	#DIV/0!	3000000	#DIV/0!	#DIV/0!	#DIV/0!	22.2807	#DIV/0!
			Dead					#DIV/0!					#DIV/0!
			Red					#DIV/0!
Dec 7/21	299	UM+10%FBS	Live	47	50	41	43	45.25	905000	3000000	4525000	96.2766	0.592611	22.8733	0
			Dead	2	3	1	1	1.75					0.592611
			Red	0	0	0	0	0
Dec 14/21	306	UM+10%FBS	Live	24	18	26	45	28.25	565000	3000000	2825000	89.6825	-0.0866613	22.87	0.884956
			Dead	3	3	4	3	3.25					-0.0866613
			Red	1	0	0	0	0.25
Dec 21/21	313	UM+10%FBS	Live	65	72	70	79	71.5	1430000	2825000	7150000	97.6109	1.33891	24.2089	0
			Dead	2	2	2	1	1.75					1.33891
			Red	0	0	0	0	0
Dec 28/21	320	UM+10%FBS	Live	128	111	112	146	124.25	2485000	3000000	12425000	99.004	2.04902	26.2579	0.201207
			Dead	2	1	1	1	1.25					2.04902
			Red	0	1	0	0	0.25
Jan 4/22	327	UM+10%FBS	Live	63	60	70	69	65.5	1310000	3000000	6550000	98.4962	1.12588	27.3838	19.084
			Dead	0	2	1	1	1					1.12588
			Red	9	17	14	10	12.5
Jan 11/22	334	UM+10%FBS	Live	37	50	56	49	48	960000	3000000	4800000	98.4615	0.677678	28.0615	0
			Dead	1	0	2	0	0.75					0.677678
			Red	0	0	0	0	0
Jan 18/22	341	UM+10%FBS	Live	92	119	103	130	111	2220000	3000000	11100000	99.3289	1.88643	29.9479	0.225225
			Dead	0	1	1	1	0.75					1.88643
			Red	0	1	0	0	0.25
Jan 25/22	348	UM+10%FBS	Live	74	77	86	74	77.75	1555000	3000000	7775000	100	1.37308	31.321	8.36013
			Dead	0	0	0	0	0					1.37308
			Red	7	6	7	6	6.5
Feb 1/22	355	UM+10%FBS	Live	103	124	124	102	113.25	2265000	3000000	11325000	99.1247	1.91536	33.2364	0
			Dead	0	1	0	3	1					1.91536
			Red	0	0	0	0	0
Feb 8/22	362	UM+10%FBS	Live	92	65	76	75	77	1540000	3000000	7700000	98.4026	1.35911	34.5955	0
			Dead	0	1	1	3	1.25					1.35911
			Red	0	0	0	0	0
Feb 15/22	369	UM+10%FBS	Live	81	83	78	80	80.5	1610000	3000000	8050000	99.0769	1.4232	36.0187	0
			Dead	1	1	0	1	0.75					1.4232
			Red	0	0	0	0	0
Feb 22/22	376	UM+10%FBS	Live	92	87	85	111	93.75	1875000	3000000	9375000	99.4695	1.6429	37.6616	0
			Dead	0	1	0	1	0.5					1.6429
			Red	0	0	0	0	0
Mar 1/22	383	UM+10%FBS	Live	93	83	95	89	90	1800000	3000000	9000000	99.4475	1.58404	39.2456	0
			Dead	0	1	1	0	0.5					1.58404
			Red	0	0	0	0	0
Mar 8/22	390	UM+10%FBS	Live	125	114	101	131	117.75	2355000	3000000	11775000	98.5356	1.97155	41.2172	0
			Dead	1	2	2	2	1.75					1.97155
			Red	0	0	0	0	0
Mar 15/22	397	UM+10%FBS	Live	61	81	69	65	69	1380000	3000000	6900000	98.5714	1.20094	42.4181	0
			Dead	1	2	0	1	1					1.20094
			Red	0	0	0	0	0
Mar 22/22	404	UM+10%FBS	Live	95	76	81	83	83.75	1675000	3000000	8375000	99.4065	1.48027	43.8984	0
			Dead	1	0	1	0	0.5					1.48027
			Red	0	0	0	0	0
Mar 25/22	407	UM+10%FBS	Live	109	91	119	115	108.5	2170000	3000000	10850000	98.6364	1.85358	45.752	0
			Dead	1	1	1	3	1.5					1.85358
			Red	0	0	0	0	0
Mar 28/22	410	UM+10%FBS	Live	107	97	89	111	101	2020000	3000000	10100000	99.2629	1.7503	47.5023	0
			Dead	0	2	1	0	0.75					1.7503
			Red	0	0	0	0	0
Apr 5/22	418	UM+10%FBS	Live	82	78	82	68	77.5	1550000	3000000	7750000	96.2733	1.36844	48.8707	0
			Dead	2	4	3	3	3					1.36844
			Red	0	0	0	0	0
Apr 12/22	425	UM+10%FBS	Live	59	61	60	56	59	1180000	3000000	5900000	99.1597	0.975186	49.8459	0.423729
			Dead	0	1	0	1	0.5					0.975186
			Red	0	0	0	1	0.25
Apr 19/22	432	UM+10%FBS	Live	65	64	65	73	66.75	1335000	3000000	6675000	98.8889	1.15314	50.999	0
			Dead	1	1	0	1	0.75					1.15314
			Red	0	0	0	0	0
Apr 26/22	439	UM+10%FBS	Live	102	93	90	89	93.5	1870000	3000000	9350000	97.1429	1.63905	52.6381	0.26738
			Dead	3	2	4	2	2.75					1.63905
			Red	0	0	0	1	0.25
May 3/22	446	UM+10%FBS	Live	141	154	115	132	135.5	2710000	3000000	13550000	98.725	2.174	54.8121	0
			Dead	1	3	1	2	1.75					2.174
			Red	0	0	0	0	0
May 10/22	453	UM+10%FBS	Live	106	105	104	99	103.5	2070000	3000000	10350000	99.5192	1.78556	56.5976	0
			Dead	0	1	0	1	0.5					1.78556
			Red	0	0	0	0	0
May 17/22	460	UM+10%FBS	Live	77	81	93	103	88.5	1770000	3000000	8850000	99.4382	1.55981	58.1574	0
			Dead	0	1	1	0	0.5					1.55981
			Red	0	0	0	0	0
May 24/22	467	UM+10%FBS	Live	81	87	96	78	85.5	1710000	3000000	8550000	99.4186	1.51008	59.6675	0
			Dead	0	2	0	0	0.5					1.51008
			Red	0	0	0	0	0
May 31/22	474	UM+10%FBS	Live	82	72	77	69	75	1500000	3000000	7500000	99.3377	1.32116	60.9887	0.333333
			Dead	1	1	0	0	0.5					1.32116
			Red	0	0	1	0	0.25
Jun 7/22	481	UM+10%FBS	Live	96	110	118	120	111	2220000	3000000	11100000	99.7753	1.88643	62.8751	0.45045
			Dead	1	0	0	0	0.25					1.88643
			Red	2	0	0	0	0.5
Jun 14/22	488	UM+10%FBS	Live	98	83	67	107	88.75	1775000	3000000	8875000	97.2603	1.56388	64.439	0
			Dead	4	1	1	4	2.5					1.56388
			Red	0	0	0	0	0
Jun 21/22	495	UM+10%FBS	Live	73	81	85	72	77.75	1555000	3000000	7775000	99.361	1.37308	65.8121	0
			Dead	0	1	0	1	0.5					1.37308
			Red	0	0	0	0	0
Jun 28/22	502	UM+10%FBS	Live	119	136	120	114	122.25	2445000	3000000	12225000	98.7879	2.02562	67.8377	0
			Dead	1	2	2	1	1.5					2.02562
			Red	0	0	0	0	0
July 5/22	509	UM+10%FBS	Live	122	111	131	132	124	2480000	3000000	12400000	98.2178	2.04612	69.8838	0
			Dead	2	2	3	2	2.25					2.04612
			Red	0	0	0	0	0
July 12/22	516	UM+10%FBS	Live	91	82	92	100	91.25	1825000	3000000	9125000	98.6486	1.60393	71.4877	0
			Dead	1	0	2	2	1.25					1.60393
			Red	0	0	0	0	0
July 19/22	523	UM+10%FBS	Live	64	70	78	77	72.25	1445000	3000000	7225000	98.9726	1.2673	72.755	0
			Dead	0	1	1	1	0.75					1.2673
			Red	0	0	0	0	0
July 26/22	530	UM+10%FBS	Live	86	99	96	100	95.25	1905000	3000000	9525000	99.7382	1.66579	74.4208	0
			Dead	0	0	1	0	0.25					1.66579
			Red	0	0	0	0	0
Aug 2/22	537	UM+10%FBS	Live	84	120	101	111	104	2080000	3000000	10400000	99.7602	1.79251	76.2133	0
			Dead	1	0	0	0	0.25					1.79251
			Red	0	0	0	0	0
Aug 9/22	543	UM+10%FBS	Live	132	119	121	121	123.25	2465000	3000000	12325000	99.596	2.03737	78.2507	0
			Dead	0	1	0	1	0.5					2.03737
			Red	0	0	0	0	0
Aug 16/22	550	UM+10%FBS	Live	135	133	139	149	139	2780000	3000000	13900000	93.1323	2.21077	80.4615	0
			Dead	12	10	10	9	10.25					2.21077
			Red	0	0	0	0	0
Aug 23/22	557	UM+10%FBS	Live	141	152	123	128	136	2720000	3000000	13600000	92.0474	2.17931	82.6408	0
			Dead	16	7	8	16	11.75					2.17931
			Red	0	0	0	0	0
Aug 30/22	564	UM+10%FBS	Live	120	102	119	136	119.25	2385000	3000000	11925000	99.5825	1.9898	84.6306	0
			Dead	0	1	1	0	0.5					1.9898
			Red	0	0	0	0	0
Sept 6/22	571	UM+10%FBS	Live	130	131	174	154	147.25	2945000	3000000	14725000	98.3306	2.2939	86.9245	0
			Dead	1	2	3	4	2.5					2.2939
			Red	0	0	0	0	0
Sept 13/22	578	UM+10%FBS	Live	120	147	115	133	128.75	2575000	3000001	12875000	98.659	2.10032	89.0248	0
			Dead	2	2	1	2	1.75					2.10032
			Red	0	0	0	0	0
Sep 20/22	585	UM+10%FBS	Live	79	92	76	85	83	1660000	3000002	8300000	97.9351	1.4673	90.4921	0
			Dead	3	2	1	1	1.75					1.4673
			Red	0	0	0	0	0
Sep 27/22	592	UM+10%FBS	Live	122	98	117	112	112.25	2245000	3000003	11225000	98.6813	1.90257	92.3947	0
			Dead	1	2	0	3	1.5					1.90257
			Red	0	0	0	0	0
Oct 4/22	599	UM+10%FBS	Live	158	157	178	162	163.75	3275000	3000004	16375000	82.4937	2.44704	94.8417	0
			Dead	28	33	41	37	34.75					2.44704
			Red	0	0	0	0	0

## Sheet: UM 15% FBS
Table S1. Growth and viability of L. variegatus embryonic cells - Embryoid body seeded culture changed from UM+5%FBS to UM+15%FBS at Day 292 in culture
Date	Experiment Day	Media	Cell state	Cell Counts (hemocytometer)				Average cell counts	Cells/ml	Number cells seeded	Total cells	Viability % live cells	Pop doubling	Cumulative population doubling	Percent red cells
				Ch1	Ch2	Ch3	Ch4
Lv Blastula Cell Culture - Embryoid body seeded culture changed from UM+5%FBS to UM+15%FBS at Day 292 in culture
Nov 30/21	292	UM+15%FBS	Live					#DIV/0!	#DIV/0!	3000000	#DIV/0!	#DIV/0!	#DIV/0!	22.2807	#DIV/0!
			Dead					#DIV/0!					#DIV/0!
			Red					#DIV/0!
Dec 7/21	299	UM+15%FBS	Live	43	41	48	47	44.75	895000	3000000	4475000	95.7219	0.57659	22.8573	1.67598
			Dead	3	2	1	2	2					0.57659
			Red	0	0	2	1	0.75
Dec 14/21	306	UM+15%FBS	Live	36	42	46	43	41.75	835000	3000000	4175000	93.8202	0.476537	23.3338	1.79641
			Dead	1	4	2	4	2.75					0.476537
			Red	1	1	1	0	0.75
Dec 21/21	313	UM+15%FBS	Live	99	84	103	86	93	1860000	3000000	9300000	98.153	1.63132	24.9652	1.34409
			Dead	0	2	3	2	1.75					1.63132
			Red	2	1	1	1	1.25
Dec 28/21	320	UM+15%FBS	Live	132	122	124	141	129.75	2595000	3000000	12975000	98.1096	2.11147	27.0766	0.770713
			Dead	1	2	5	2	2.5					2.11147
			Red	0	1	0	3	1
Jan 4/22	327	UM+15%FBS	Live	82	70	88	92	83	1660000	3000000	8300000	98.2249	1.4673	28.5439	7.53012
			Dead	0	2	2	2	1.5					1.4673
			Red	7	5	7	6	6.25
Jan 11/22	334	UM+15%FBS	Live	41	31	45	38	38.75	775000	3000000	3875000	98.1013	0.36902	28.9129	0
			Dead	1	0	2	0	0.75					0.36902
			Red	0	0	0	0	0
Jan 18/22	341	UM+15%FBS	Live	50	51	51	50	50.5	1010000	3000000	5050000	99.0196	0.750885	29.6638	0
			Dead	0	1	0	1	0.5					0.750885
			Red	0	0	0	0	0
Jan 25/22	348	UM+15%FBS	Live	73	85	100	94	88	1760000	3000000	8800000	100	1.55164	31.2155	6.81818
			Dead	0	0	0	0	0					1.55164
			Red	4	6	9	5	6
Feb 1/22	355	UM+15%FBS	Live	61	72	71	68	68	1360000	3000000	6800000	99.2701	1.17989	32.3954	0
			Dead	0	1	0	1	0.5					1.17989
			Red	0	0	0	0	0
Feb 8/22	362	UM+15%FBS	Live	60	67	66	67	65	1300000	3000000	6500000	99.2366	1.11483	33.5102	0.769231
			Dead	0	0	1	1	0.5					1.11483
			Red	0	0	1	1	0.5
Feb 15/22	369	UM+15%FBS	Live	72	73	70	69	71	1420000	3000000	7100000	98.6111	1.24214	34.7523	0.352113
			Dead	1	1	2	0	1					1.24214
			Red	0	0	0	1	0.25
Feb 22/22	376	UM+15%FBS	Live	71	79	74	84	77	1540000	3000000	7700000	99.3548	1.35911	36.1114	0
			Dead	1	1	0	0	0.5					1.35911
			Red	0	0	0	0	0
Mar 1/22	383	UM+15%FBS	Live	67	68	68	68	67.75	1355000	3000000	6775000	99.6324	1.17458	37.286	0.738007
			Dead	0	0	1	0	0.25					1.17458
			Red	0	0	2	0	0.5
Mar 8/22	390	UM+15%FBS	Live	58	54	54	61	56.75	1135000	3000000	5675000	100	0.919124	38.2051	0
			Dead	0	0	0	0	0					0.919124
			Red	0	0	0	0	0
Mar 15/22	397	UM+15%FBS	Live	61	53	63	76	63.25	1265000	3000000	6325000	99.2157	1.07548	39.2806	0
			Dead	2	0	0	0	0.5					1.07548
			Red	0	0	0	0	0
Mar 22/22	404	UM+15%FBS	Live	83	99	100	74	89	1780000	3000000	8900000	99.4413	1.56793	40.8485	0
			Dead	0	1	1	0	0.5					1.56793
			Red	0	0	0	0	0
Mar 25/22	407	UM+15%FBS	Live	56	52	42	50	50	1000000	3000000	5000000	99.5025	0.736538	41.5851	0
			Dead	0	1	0	0	0.25					0.736538
			Red	0	0	0	0	0
Mar 28/22	410	UM+15%FBS	Live	51	53	79	63	61.5	1230000	3000000	6150000	99.5951	1.03502	42.6201	0
			Dead	0	0	0	1	0.25					1.03502
			Red	0	0	0	0	0
Apr 5/22	418	UM+15%FBS	Live	53	60	62	65	60	1200000	3000000	6000000	98.7654	0.99942	43.6195	0
			Dead	0	1	1	1	0.75					0.99942
			Red	0	0	0	0	0
Apr 12/22	425	UM+15%FBS	Live	75	71	66	82	73.5	1470000	3000000	7350000	98.9899	1.29203	44.9115	0
			Dead	2	1	0	0	0.75					1.29203
			Red	0	0	0	0	0
Apr 19/22	432	UM+15%FBS	Live	96	107	101	102	101.5	2030000	3000000	10150000	99.0244	1.75742	46.669	0
			Dead	1	0	0	3	1					1.75742
			Red	0	0	0	0	0
Apr 26/22	439	UM+15%FBS	Live	90	81	89	71	82.75	1655000	3000000	8275000	97.6401	1.46295	48.1319	0
			Dead	1	2	4	1	2					1.46295
			Red	0	0	0	0	0
May 3/22	446	UM+15%FBS	Live	82	77	87	88	83.5	1670000	3000000	8350000	98.2353	1.47596	49.6079	0
			Dead	0	1	3	2	1.5					1.47596
			Red	0	0	0	0	0
May 10/22	453	UM+15%FBS	Live	73	87	79	101	85	1700000	3000000	8500000	99.7067	1.50163	51.1095	0
			Dead	0	0	0	1	0.25					1.50163
			Red	0	0	0	0	0
May 17/22	460	UM+15%FBS	Live	102	86	120	98	101.5	2030000	3000000	10150000	99.7543	1.75742	52.8669	0
			Dead	0	0	0	1	0.25					1.75742
			Red	0	0	0	0	0
May 24/22	467	UM+15%FBS	Live	56	63	65	66	62.5	1250000	3000000	6250000	93.633	1.05828	53.9252	0
			Dead	3	2	5	7	4.25					1.05828
			Red	0	0	0	0	0
May 31/22	474	UM+15%FBS	Live	63	79	75	95	78	1560000	3000000	7800000	100	1.37771	55.3029	0
			Dead	0	0	0	0	0					1.37771
			Red	0	0	0	0	0
Jun 7/22	481	UM+15%FBS	Live	95	68	110	101	93.5	1870000	3000000	9350000	100	1.63905	56.942	0
			Dead	0	0	0	0	0					1.63905
			Red	0	0	0	0	0
Jun 14/22	488	UM+15%FBS	Live	69	59	62	81	67.75	1355000	3000000	6775000	90.0332	1.17458	58.1165	0.369004
			Dead	15	4	5	6	7.5					1.17458
			Red	1	0	0	0	0.25
Jun 21/22	495	UM+15%FBS	Live	68	57	61	62	62	1240000	3000000	6200000	100	1.0467	59.1632	0
			Dead	0	0	0	0	0					1.0467
			Red	0	0	0	0	0
Jun 28/22	502	UM+15%FBS	Live	67	58	53	58	59	1180000	3000000	5900000	98.3333	0.975186	60.1384	0
			Dead	1	1	1	1	1					0.975186
			Red	0	0	0	0	0
July 5/22	509	UM+15%FBS	Live	80	88	103	106	94.25	1885000	3000000	9425000	98.9501	1.65057	61.789	0
			Dead	1	1	1	1	1					1.65057
			Red	0	0	0	0	0
July 12/22	516	UM+15%FBS	Live	66	56	60	75	64.25	1285000	3000000	6425000	99.2278	1.0981	62.8871	0
			Dead	0	1	0	1	0.5					1.0981
			Red	0	0	0	0	0
July 19/22	523	UM+15%FBS	Live	46	34	41	51	43	860000	3000000	4300000	99.422	0.519073	63.4062	0
			Dead	0	0	0	1	0.25					0.519073
			Red	0	0	0	0	0
July 26/22	530	UM+15%FBS	Live	76	50	53	54	58.25	1165000	3000000	5825000	99.5726	0.95674	64.3629	0
			Dead	0	0	0	1	0.25					0.95674
			Red	0	0	0	0	0
Aug 2/22	537	UM+15%FBS	Live	78	100	89	112	94.75	1895000	3000000	9475000	99.4751	1.6582	66.0211	0
			Dead	1	0	1	0	0.5					1.6582
			Red	0	0	0	0	0
Aug 9/22	543	UM+15%FBS	Live	68	86	62	67	70.75	1415000	3000000	7075000	99.6479	1.23705	67.2582	0
			Dead	0	0	1	0	0.25					1.23705
			Red	0	0	0	0	0
Aug 16/22	550	UM+15%FBS	Live	153	151	164	151	154.75	3095000	3000000	15475000	79.6654	2.36553	69.6237	0
			Dead	36	32	59	31	39.5					2.36553
			Red	0	0	0	0	0
Aug 23/22	557	UM+15%FBS	Live	90	117	87	98	98	1960000	3000000	9800000	77.9324	1.70683	71.3305	0
			Dead	26	18	37	30	27.75					1.70683
			Red	0	0	0	0	0
Aug 30/22	564	UM+15%FBS	Live	83	90	89	87	87.25	1745000	3000000	8725000	99.7143	1.5393	72.8698	0
			Dead	0	1	0	0	0.25					1.5393
			Red	0	0	0	0	0
Sept 6/22	571	UM+15%FBS	Live	75	73	71	91	77.5	1550000	3000000	7750000	99.359	1.36844	74.2383	0
			Dead	0	2	0	0	0.5					1.36844
			Red	0	0	0	0	0
Sept 13/22	578	UM+15%FBS	Live	82	81	78	72	78.25	1565000	3000001	7825000	97.8125	1.38232	75.6206	0
			Dead	2	1	1	3	1.75					1.38232
			Red	0	0	0	0	0
Sep 20/22	585	UM+15%FBS	Live	69	84	72	89	78.5	1570000	3000002	7850000	97.8193	1.38692	77.0075	0
			Dead	3	1	2	1	1.75					1.38692
			Red	0	0	0	0	0
Sep 27/22	592	UM+15%FBS	Live	85	83	92	90	87.5	1750000	3000003	8750000	98.3146	1.54342	78.5509	0
			Dead	2	3	1	0	1.5					1.54342
			Red	0	0	0	0	0
Oct 4/22	599	UM+15%FBS	Live	79	78	63	77	74.25	1485000	3000004	7425000	75.5725	1.30667	79.8576	0
			Dead	24	14	33	25	24					1.30667
			Red	0	0	0	0	0

## Sheet: UM Summary Graph
Table S1. Growth and viability of L. variegatus embryonic cells - Summary of all Urchin Media (UM) conditions
Cumulative PDL							Percent Viability
Day	UM 3%	UM 3-5%	EB UM 3-5%	UM 10%	UM 15%		Day	UM 3%	UM 3-5%	EB UM 3-5%	UM 10%	UM 15%
0	0	0					0	100	100
3	1.12	1.18					3	99.0909	100
7	2.18771	2.57809					7	99.2095	99.0596
11	2.18771	2.96559					11	95.2941	89.7143
15	2.18771	2.96559					15	92.6471	92.2414
19	2.19	2.96559					19	84.4444	79.1045
22	2.19	2.96559					22	72.549	61.7647
33	3.1093	3.96942					33	80.4598	80.7692
40	3.11	3.96942					40	84.6154	82.7957
47	3.11	3.97					47	81.5789	89.5522
54	3.88328	4.21272					54	82.8125	87.6543
61	3.99323	4.31084					61	91.2281	90.4762
68	4.55925	4.31084					68	90.5882	91.25
75	4.89219	4.67455					75	90.6542	89.5238
82	5.23139	4.76377					82	91.8367	92.5926
89	5.3509	4.81436					89	94.6237	95.6044
96	6.54898	5.30188					96	92.6606	92.4242
99	6.89432	5.3					99	92.7711	92.42
103	7.12725	5.30188					103	95.7672	93.3333
106	7.76658	5.92968					106	94.6309	95.5882
110	8.18903	6.38279					110	93.8547	90.8163
113	8.6905	6.38279					113	95.7317	72.4138
117	9.60584	6.63483					117	95.0413	77.9412
120	9.7168	6.72703					120	88.5246	76.8707
124	9.83221	7.4456					124	91.4062	88.1517
131	9.83221	8.13485					131	83.6538	89.2857
138	9.83221	8.36533					138	84.127	84.6154
145	9.85916	9.15147					145	75	83.8057
152	10.72	9.15	10.72				152	85.96	72.18	85.96
159	13.24	9.37	10.72				159	95.16	81.16	92.21
166	13.24	9.96	11.21				166	89.38	87.5	88.84
173	13.61	10.71	12.06				173	81.15	79.6	86.45
180	13.61	10.96	12.08				180	72.97	75.53	69.32
187	14.79	10.96	12.23				187	77.49	50.4	62.74
196	15.82	11.07	12.62				196	86.32	57.63	69.78
208	15.82	11.98	12.84				208	61.36	64.32	61.95
215	16.91	12.1	13.46				215	78.5	58.04	69.43
222	17.67	12.7	13.66				222	68.12	71.37	57.98
229	18.79	13.47	15.33				229	66.5	65.4	67.14
236	19.1181	13.4749	15.3301				236	66.2281	45.0617	52.2989
243	19.2111	13.4749	15.3301				243	58.9862	41.0959	51.6129
250	19.6703	13.4749	15.4175				250	70.2128	24.1135	55.7377
257	19.7967	13.9477	16.0162				257	55.9829	72.093	69.1275
264	20.3733	13.9477	16.7216				264	62.807	59.7015	73.6842
271	21.1384	14.5202	17.8308				271	66.4495	73.0061	83.8188
279	22.08	15.22	19.1424				279	68.75	84.28	88.43
285	22.23	16.18	19.9765				285	59.38	87.64	90.68
292	22.29	17.82	21.3997	22.2807	22.2807		292	55.56	93.5	94.99
299	23.069	18.3216	22.3809	22.8733	22.8573		299	68.4385	78.341	85.8696	96.2766	95.7219
306	23.8482	18.6142	23.2679	22.87	23.3338		306	69.1275	87.5	91.358	89.6825	93.8202
313	24.3247	19.2461	24.366	24.2089	24.9652		313	60.7273	85.3211	89.8601	97.6109	98.153
320	24.9721	20.3159	25.1382	26.3446	27.0766		320	72.5869	87.8049	89.9123	99.004	98.1096
327	26.4219	21.7211	26.7382	27.5571	28.5439		327	67.28	99.375	97.5871	98.4962	98.2249
334	26.4219	22.9632	27.6381	28.0615	28.9129		334	61.9632	93.7294	94.9153	98.4615	98.1013
341	27.1383	23.9506	29.3486	29.9479	29.6638		341	72.807	96.3563	97.2772	99.3289	99.0196
348	28.8191	24.7506	30.892	31.321	31.2155		348	82.71	99.5238	99.7151	100	100
355	29.8065	26.5115	32.5078	33.2364	32.3954		355	92.607	96.6746	96.0836	99.1247	99.2701
362	30.2916	27.1892	33.755	34.5955	33.5102		362	91.3043	95.0495	95.6376	98.4026	99.2366
369	30.7244	27.6829	34.7117	36.0187	34.7523		369	93.1034	93.3702	95.4918	99.0769	98.6111
376	31.7998	28.9402	36.3813	37.6616	36.1114		376	92	95.9866	97.6982	99.4695	99.3548
383	32.719	29.7053	38.0009	39.2456	37.286		383	89.0196	95.7746	97.1053	99.4475	99.6324
390	32.7778	30.3294	38.3792	41.2172	38.2051		390	83.3333	97.3684	96.2963	98.5356	100
397	33.0899	30.771	38.7482	42.4181	39.2806		397	87.6471	95.3216	94.5122	98.5714	99.2157
404	33.7218	31.471	39.6674	43.8984	40.8485		404	86.1111	95.5882	93.8017	99.4065	99.4413
407	33.7218	31.471	39.6674	45.752	41.5851		407	86.1111	95.5882	93.8017	98.6364	99.5025
410	34.2576	32.2572	41.3482	47.5023	42.6201		410	90.1554	96.2791	92.1053	99.2629	99.5951
418	34.7513	33.0081	42.7166	48.8707	43.6195		418	85.3535	94.8357	96.2733	96.2733	98.7654
425	35.2104	33.9016	44.6728	49.8459	44.9115		425	92.6966	91.3934	94.9084	99.1597	98.9899
432	36.0974	34.8645	45.5792	50.999	46.669		432	94.0678	92.126	89.6414	98.8889	99.0244
439	36.7137	35.6714	46.6374	52.6381	48.1319		439	91.5423	88.9831	89.2857	97.1429	97.6401
446	37.5411	36.3187	48.402	54.8121	49.6079		446	87.6543	87.4419	89.8678	98.725	98.2353
453	38.1416	37.6778	50.0059	56.5976	51.1095		453	81.982	95.9502	96.3061	99.5192	99.7067
460	38.8709	38.5841	50.9058	58.1574	52.8669		460	85.0427	97.8261	99.115	99.4382	99.7543
467	39.636	39.425	51.9641	59.6675	53.9252		467	89.8678	95.1327	93.633	99.4186	93.633
474	40.0952	40.1397	52.8576	60.9887	55.3029		474	87.766	98.5	96.9565	99.3377	100
481	40.6309	41.0525	53.9159	62.8751	56.942		481	93.0481	98.2609	98.8142	99.7753	100
488	40.9906	42.4757	55.8471	64.439	58.1165		488	89.0173	95.549	92.9006	97.2603	90.0332
495	41.1281	44.2542	57.0739	65.8121	59.1632		495	85.7143	96.7136	96.2329	99.361	100
502	41.4877	44.9617	57.9347	67.8377	60.1384		502	91.1243	97.0297	96.8889	98.7879	98.3333
509	42.2739	46.3982	60.4421	69.8838	61.789		509	88.0851	98.1873	98.2734	98.2178	98.9501
516	42.6147	47.0834	61.6482	71.4877	62.8871		516	81.7204	93.6893	97.193	98.6486	99.2278
523	43.262	47.8626	62.2086	72.755	63.4062		523	84.6847	98.0952	96.7213	98.9726	99.422
530	43.9094	48.7167	63.0891	74.4208	64.3629		530	83.9286	97.3094	95.2586	99.7382	99.5726
537	44.549	49.734	64.3958	76.2133	66.0211		537	85.7798	97.2	98.3444	99.7602	99.4751
543	45.1094	51.0063	65.7964	78.2507	67.2582		543	85.0962	98.6395	99.0625	99.596	99.6479
550	46.0221	52.7423	67.2286	80.4615	69.6237		550	83.7037	84.0336	87.3315	93.1323	79.6654
557	47.5941	54.5209	69.5077	82.6408	71.3305		557	81.6934	85.6549	88.3333	92.0474	77.9324
564	48.3733	56.2959	71.47	84.6306	72.8698		564	87.2881	99.0361	98.5263	99.5825	99.7143
571	49.1733	57.9693	72.9198	86.9245	74.2383		571	81.6406	96.7172	97.9104	98.3306	99.359
578	50.1906	59.4279	74.2648	89.0248	75.6206		578	94.5525	97.6331	97.1338	98.659	97.8125
585	51.8752	61.063	75.7833	90.4921	77.0075		585	98.2188	98.1579	98.2857	97.9351	97.8193
592	53.1672	62.6905	77.3912	92.3947	78.5509		592	97.0297	98.6702	98.3871	98.6813	98.3146
599	54.124	64.7337	79.9258	94.8417	79.8576		599	85.0365	69.7183	81.4988	82.4937	75.5725

## Sheet: Red cells Graph
Table S1. Growth and viability of L. variegatus embryonic cells - percent of red cells
Exp Day	3-5% FBS	3% FBS	EB only	10% FBS	15% FBS
3	5.72687	0
7	1.89873	1.19522
11	1.91083	0
15	1.86916	1.5873
19	0	7.89474
22	0	2.7027
33	0	0
40	0	0
47	0	0
54	0	1.88679
61	0	0
68	0	10.3896
75	1.06383	1.03093
82	0	0
89	5.74713	1.13636
96	5.7377	0.990099
103	0	0
106	0	1.41844
110	2.24719	0
113	2.38095	0
117	4.71698	0.869565
120	0	1.85185
124	1.6129	0
131	2.66667	1.14943
138	0	7.54717
145	0	1.85185
152	1.04167	0
159	0.892857	0	0
166	0.595238	0	0
173	1.47783	0	0
180	2.11268	0	0
187	3.1746	0.735294	0
196	2.94118	2.43902	1.91083
208	0.78125	0	3.57143
215	2.30769	0	1.63043
222	1.0989	0.492611	4.34783
229	1.45631	0	0.78534
236	1.36986	0.662252	3.2967
243	5	0.78125	3.125
250	0	0	0
257	1.07527	0	0.970874
264	1.25	0.558659	1.19048
271	0	0	0.3861
279	0.518135	0.865801	0.33557
285	0	2.25564	0.934579
292	0.534759	0.8	0.310559	0	0
299	1.17647	0	0	0	1.67598
306	0.680272	0	0.900901	0.884956	1.79641
313	2.15054	0	0.389105	0	1.34409
320	1.98413	0.531915	0.487805	0.201207	0.770713
327	14.4654	28.9634	23.0769	19.084	7.53012
334	2.46479	0	0	0	0
341	1.2605	0.60241	0	0.225225	0
348	11.0048	25.4545	7.71429	8.36013	6.81818
355	0.737101	0	0	0	0
362	3.125	0	0	0	0.769231
369	2.95858	0	0	0	0.352113
376	2.09059	0	0	0	0
383	1.96078	0	0	0	0.738007
390	1.08108	0	0	0	0
397	0.613497	0.671141	0	0	0
404	0.512821	0	0	0	0
407	0	0	0	0	0
410	1.93237	0	0	0	0
418	0.990099	0	0	0	0
425	0	0	0	0.423729	0
432	0.42735	0	0	0	0
439	0.47619	0	0	0.26738	0
446	1.59574	0	0	0	0
453	1.62338	0	0	0	0
460	0.444444	0	0	0	0
467	0.465116	0	0	0	0
474	1.52284	0	0	0.333333	0
481	2.21239	0	0	0.45045	0
488	0.310559	0	0	0	0.369004
495	1.45631	0	0	0	0
502	5.10204	0	0	0	0
509	1.23077	0	0	0	0
516	1.5544	0	0	0	0
523	1.45631	0	0	0	0
530	2.76498	0	0	0	0
537	1.64609	0	0	0	0
543	0.689655	0	0	0	0
550	0.75	0	0	0	0
557	0.485437	0	0	0	0
564	0.973236	0	0	0	0
571	0.522193	0	0	0	0
578	0.30303	0	0	0	0
585	0.268097	0	0	0	0
592	0	0	0	0	0
599	0	0	0	0	0

## Sheet: EB vs Cells graph
Table S1. Growth and viability of L. variegatus embryonic cells - Size fractionated cultures seeded with single suspension cells (<40 um) or Embryoid bodies (>40 um)
Cumulative PDL					Percent Viability
Day	UM 3%	EBs	Cells		Day	UM 3%	EBs	Cells
0	0				0	100
3	1.12				3	99.0909
7	2.18771				7	99.2095
11	2.18771				11	95.2941
15	2.18771				15	92.6471
19	2.19				19	84.4444
22	2.19				22	72.549
33	3.1093				33	80.4598
40	3.11				40	84.6154
47	3.11				47	81.5789
54	3.88328				54	82.8125
61	3.99323				61	91.2281
68	4.55925				68	90.5882
75	4.89219				75	90.6542
82	5.23139				82	91.8367
89	5.3509				89	94.6237
96	6.54898				96	92.6606
99	6.89432				99	92.7711
103	7.12725				103	95.7672
106	7.76658				106	94.6309
110	8.18903				110	93.8547
113	8.6905				113	95.7317
117	9.60584				117	95.0413
120	9.7168				120	88.5246
124	9.83221				124	91.4062
131	9.83221				131	83.6538
138	9.83221				138	84.127
145	9.85916				145	75
152	10.72	10.72	10.72		152	85.96	85.96	85.96
159	13.24	10.72	10.72		159	95.16	92.21	74.64
166	13.24	11.21	10.72		166	89.38	88.84	42.59
173	13.61	12.06	10.72		173	81.15	86.45	10.11
180	13.61	12.08	10.72		180	72.97	69.32	7.25
187	14.79	12.23	10.72		187	77.49	62.74	0
196	15.82	12.62			196	86.32	69.78
208	15.82	12.84			208	61.36	61.95
215	16.91	13.46			215	78.5	69.43
222	17.67	13.66			222	68.12	57.98
229	18.79	15.33			229	66.5	67.14
236	19.1181	15.3301			236	66.2281	52.2989
243	19.2111	15.3301			243	58.9862	51.6129
250	19.6703	15.4175			250	70.2128	55.7377
257	19.7967	16.0162			257	55.9829	69.1275
264	20.3733	16.7216			264	62.807	73.6842
271	21.1384	17.8308			271	66.4495	83.8188
279	22.08	19.1424			279	68.75	88.43
285	22.23	19.9765			285	59.38	90.68
292	22.29	21.3997			292	55.56	94.99
299	23.069	22.3809			299	68.4385	85.8696
306	23.8482	23.2679			306	69.1275	91.358
313	24.3247	24.366			313	60.7273	89.8601
320	24.9721	25.1382			320	72.5869	89.9123
327	26.4219	26.7382			327	67.28	97.5871
334	26.4219	27.6381			334	61.9632	94.9153
341	27.1383	29.3486			341	72.807	97.2772
348	28.8191	30.892			348	82.71	99.7151
355	29.8065	32.5078			355	92.607	96.0836
362	30.2916	33.755			362	91.3043	95.6376
369	30.7244	34.7117			369	93.1034	95.4918
376	31.7998	36.3813			376	92	97.6982
383	32.719	38.0009			383	89.0196	97.1053
390	32.7778	38.3792			390	83.3333	96.2963
397	33.0899	38.7482			397	87.6471	94.5122
404	33.7218	39.6674			404	86.1111	93.8017
407	33.7218	39.6674			407	86.1111	93.8017
410	34.2576	41.3482			410	90.1554	92.1053
418	34.7513	42.7166			418	85.3535	96.2733
425	35.2104	44.6728			425	92.6966	94.9084
432	36.0974	45.5792			432	94.0678	89.6414
439	36.7137	46.6374			439	91.5423	89.2857
446	37.5411	48.402			446	87.6543	89.8678
453	38.1416	50.0059			453	81.982	96.3061
460	38.8709	50.9058			460	85.0427	99.115
467	39.636	51.9641			467	89.8678	93.633
474	40.0952	52.8576			474	87.766	96.9565
481	40.6309	53.9159			481	93.0481	98.8142
488	40.9906	55.8471			488	89.0173	92.9006
495	41.1281	57.0739			495	85.7143	96.2329
502	41.4877	57.9347			502	91.1243	96.8889
509	42.2739	60.4421			509	88.0851	98.2734
516	42.6147	61.6482			516	81.7204	97.193
523	43.262	62.2086			523	84.6847	96.7213
530	43.9094	63.0891			530	83.9286	95.2586
537	44.549	64.3958			537	85.7798	98.3444
543	45.1094	65.7964			543	85.0962	99.0625
550	46.0221	67.2286			550	83.7037	87.3315
557	47.5941	69.5077			557	81.6934	88.3333
564	48.3733	71.47			564	87.2881	98.5263
571	49.1733	72.9198			571	81.6406	97.9104
578	50.1906	74.2648			578	94.5525	97.1338
585	51.8752	75.7833			585	98.2188	98.2857
592	53.1672	77.3912			592	97.0297	98.3871
599	54.124	79.9258			599	85.0365	81.4988

[truncated: 1 more sheets: UM M1 SOM Graph]
