# Supplementary material for: Genetically tractable embryonic cell lines from sea urchins
Source: Research Square preprint supplement (doi:10.21203/rs.3.rs-5665288/v1), 2025-01-15
Supplement: Supplementary file 10 [file bfc9939d724fb516a834cc3a.xlsx]

## Sheet: ALL
Table S8 – Transfection conditions tested with L. variegatus embryonic cell cultures
Transfection Method	Plasmid or mRNA	Plasmid or mRNA added (ug)	MessengerMax added (uL)	Complex Formation Media	Number of cells	Recovery media	Result	Time plated cells were out of serum (hr)
Lipofectamine MessengerMAX	NPM1-RFP (mRNA)	0.1	0.15	BUM	200000	10%FBS UM	No RFP signal above background	24
Lipofectamine MessengerMAX	NPM1-RFP (mRNA)	0.1	0.3	BUM	200000	10%FBS UM	No RFP signal above background	24
Lipofectamine MessengerMAX	NPM1-RFP (mRNA)	0.5	0.75	OptiMEM	200000	BUM	No RFP signal above background	24
Lipofectamine MessengerMAX	NPM1-RFP (mRNA)	0.5	1.5	OptiMEM	200000	BUM	No RFP signal above background	24
Lipofectamine MessengerMAX	NPM1-RFP (mRNA)	0.5	0.75	OptiMEM	200000	Serum-free complete UM	No RFP signal above background	24
Lipofectamine MessengerMAX	NPM1-RFP (mRNA)	0.5	1.5	OptiMEM	200000	Serum-free complete UM	No RFP signal above background	24
Lipofectamine MessengerMAX	NPM1-RFP (mRNA)	0.5	0.75	OptiMEM	400000	Serum-free complete UM	No RFP signal above background	24
Lipofectamine MessengerMAX	NPM1-RFP (mRNA)	0.5	1.5	OptiMEM	400000	Serum-free complete UM	No RFP signal above background	24
Lipofectamine MessengerMAX	NPM1-RFP (mRNA)	0.5	0.75	OptiMEM	400000	Serum-free complete UM	No RFP signal above background	6
Lipofectamine MessengerMAX	NPM1-RFP (mRNA)	0.5	1.5	OptiMEM	400000	Serum-free complete UM	No RFP signal above background	6
Transfection Method	Plasmid, mRNA, or dye	Plasmid, mRNA, or dye added (ug)	Electroporation Buffer	Lonza condition	Number of cells	Recovery media	Result
Lonza 4D Nucleofector	LvPolyUB H2B-CFP (circular plasmid)	0.5	BUM	CM-198	200000	10%FBS UM	No CFP signal above background
Lonza 4D Nucleofector	LvPolyUB H2B-CFP (circular plasmid)	1	BUM	CM-198	200000	10%FBS UM	No CFP signal above background
Lonza 4D Nucleofector	LvPolyUB H2B-CFP (circular plasmid)	2	BUM	CM-198	200000	10%FBS UM	No CFP signal above background
Lonza 4D Nucleofector	LvPolyUB H2B-CFP (circular plasmid)	4	BUM	CM-198	200000	10%FBS UM	No CFP signal above background
Lonza 4D Nucleofector	LvPolyUB H2B-CFP (circular plasmid)	2.6	T+K	CA-137	200000	10%FBS UM	No CFP signal above background
Lonza 4D Nucleofector	LvPolyUB H2B-CFP (circular plasmid)	2.6	T+K	CM-138	200000	10%FBS UM	No CFP signal above background
Lonza 4D Nucleofector	LvPolyUB H2B-CFP (circular plasmid)	2.6	T+K	CM-137	200000	10%FBS UM	No CFP signal above background
Lonza 4D Nucleofector	LvPolyUB H2B-CFP (circular plasmid)	2.6	T+K	CM-150	200000	10%FBS UM	No CFP signal above background
Lonza 4D Nucleofector	LvPolyUB H2B-CFP (circular plasmid)	2.6	T+K	DS-138	200000	10%FBS UM	No CFP signal above background
Lonza 4D Nucleofector	LvPolyUB H2B-CFP (circular plasmid)	2.6	T+K	DS-137	200000	10%FBS UM	No CFP signal above background
Lonza 4D Nucleofector	LvPolyUB H2B-CFP (circular plasmid)	2.6	T+K	DS-130	200000	10%FBS UM	No CFP signal above background
Lonza 4D Nucleofector	LvPolyUB H2B-CFP (circular plasmid)	2.6	T+K	DS-150	200000	10%FBS UM	No CFP signal above background
Lonza 4D Nucleofector	LvPolyUB H2B-CFP (circular plasmid)	2.6	T+K	DS-120	200000	10%FBS UM	No CFP signal above background
Lonza 4D Nucleofector	NPM1-RFP (mRNA)	1	BUM	CA-137	200000	10%FBS UM	No RFP signal above background
Lonza 4D Nucleofector	NPM1-RFP (mRNA)	1	BUM	CM-138	200000	10%FBS UM	No RFP signal above background
Lonza 4D Nucleofector	NPM1-RFP (mRNA)	1	BUM	CM-137	200000	10%FBS UM	No RFP signal above background
Lonza 4D Nucleofector	NPM1-RFP (mRNA)	1	BUM	CM-150	200000	10%FBS UM	No RFP signal above background
Lonza 4D Nucleofector	NPM1-RFP (mRNA)	1	BUM	DN-100	200000	10%FBS UM	No RFP signal above background
Lonza 4D Nucleofector	NPM1-RFP (mRNA)	1	BUM	CM-198	200000	10%FBS UM	No RFP signal above background
Lonza 4D Nucleofector	NPM1-RFP (mRNA)	1	BUM	CM-158	200000	10%FBS UM	No RFP signal above background
Lonza 4D Nucleofector	NPM1-RFP (mRNA)	1	BUM	CM-189	200000	10%FBS UM	No RFP signal above background
Lonza 4D Nucleofector	NPM1-RFP (mRNA)	1	BUM	CU-137	200000	10%FBS UM	No RFP signal above background
Lonza 4D Nucleofector	NPM1-RFP (mRNA)	1	BUM	CM-198	200000	10%FBS UM	No RFP signal above background
Lonza 4D Nucleofector	NPM1-RFP (mRNA)	1	BUM	CM-156	200000	10%FBS UM	No RFP signal above background
Lonza 4D Nucleofector	NPM1-RFP (mRNA)	1	BUM	CU-150	200000	10%FBS UM	No RFP signal above background
Lonza 4D Nucleofector	Dextran, Tetramethylrhodamine, 3000 MW, Anionic	2	T+K	CA-137	200000	10%FBS UM	No Cy3 signal above background
Lonza 4D Nucleofector	Dextran, Tetramethylrhodamine, 3000 MW, Anionic	2	T+K	CM-138	200000	10%FBS UM	No Cy3 signal above background
Lonza 4D Nucleofector	Dextran, Tetramethylrhodamine, 3000 MW, Anionic	2	T+K	CM-137	200000	10%FBS UM	No Cy3 signal above background
Lonza 4D Nucleofector	Dextran, Tetramethylrhodamine, 3000 MW, Anionic	2	T+K	CM-150	200000	10%FBS UM	No Cy3 signal above background
Lonza 4D Nucleofector	Dextran, Tetramethylrhodamine, 3000 MW, Anionic	2	T+K	DS-138	200000	10%FBS UM	No Cy3 signal above background
Lonza 4D Nucleofector	Dextran, Tetramethylrhodamine, 3000 MW, Anionic	2	T+K	DS-137	200000	10%FBS UM	No Cy3 signal above background
Lonza 4D Nucleofector	Dextran, Tetramethylrhodamine, 3000 MW, Anionic	2	T+K	DS-130	200000	10%FBS UM	No Cy3 signal above background
Lonza 4D Nucleofector	Dextran, Tetramethylrhodamine, 3000 MW, Anionic	2	T+K	DS-150	200000	10%FBS UM	No Cy3 signal above background
Lonza 4D Nucleofector	Dextran, Tetramethylrhodamine, 3000 MW, Anionic	2	T+K	DS-120	200000	10%FBS UM	No Cy3 signal above background
Lonza 4D Nucleofector	Dextran, Tetramethylrhodamine, 3000 MW, Anionic	5	PBS +Mg +Ca	CM-104	250000	10%FBS UM	No Cy3 signal above background
Lonza 4D Nucleofector	Dextran, Tetramethylrhodamine, 3000 MW, Anionic	5	PBS +Mg +Ca	CM-137	250000	10%FBS UM	No Cy3 signal above background
Lonza 4D Nucleofector	Dextran, Tetramethylrhodamine, 3000 MW, Anionic	5	PBS +Mg +Ca	CM-150	250000	10%FBS UM	No Cy3 signal above background
Lonza 4D Nucleofector	Dextran, Tetramethylrhodamine, 3000 MW, Anionic	5	PBS +Mg +Ca	CN-137	250000	10%FBS UM	No Cy3 signal above background
Lonza 4D Nucleofector	Dextran, Tetramethylrhodamine, 3000 MW, Anionic	5	PBS +Mg +Ca	DS-130	250000	10%FBS UM	No Cy3 signal above background
Lonza 4D Nucleofector	Dextran, Tetramethylrhodamine, 3000 MW, Anionic	5	PBS +Mg +Ca	DS-137	250000	10%FBS UM	No Cy3 signal above background
Lonza 4D Nucleofector	Dextran, Tetramethylrhodamine, 3000 MW, Anionic	5	PBS +Mg +Ca	DT-138	250000	10%FBS UM	No Cy3 signal above background
Lonza 4D Nucleofector	Dextran, Tetramethylrhodamine, 3000 MW, Anionic	5	PBS +Mg +Ca	EH-113	250000	10%FBS UM	No Cy3 signal above background
Transfection Method	Plasmid, mRNA, or dye	Plasmid, mRNA, or dye added (ug)	Electroporation Buffer	Wave Form	Voltage	Number of pulses	Recovery media	Pulse duration (ms)	Number of cells	Cuvette gap width (mm)	Cell Viability after 24hrs (%)	Result
BioRad Gene Pulser Electroporation	LvPolyUB H2B-CFP (circular plasmid)	4	T+K	SQW	50	1	10%FBS UM	5	400000	2	98.4848	No CFP signal above background
BioRad Gene Pulser Electroporation	LvPolyUB H2B-CFP (circular plasmid)	4	T+K	SQW	50	1	10%FBS UM	10	400000	2	97.7671	No CFP signal above background
BioRad Gene Pulser Electroporation	LvPolyUB H2B-CFP (circular plasmid)	4	T+K	SQW	100	1	10%FBS UM	5	400000	2	92.6471	No CFP signal above background
BioRad Gene Pulser Electroporation	LvPolyUB H2B-CFP (circular plasmid)	4	T+K	SQW	100	1	10%FBS UM	10	400000	2	96.7742	No CFP signal above background
BioRad Gene Pulser Electroporation	LvPolyUB H2B-CFP (circular plasmid)	4	T+K	SQW	200	1	10%FBS UM	5	400000	2	92.2374	No CFP signal above background
BioRad Gene Pulser Electroporation	LvPolyUB H2B-CFP (circular plasmid)	4	T+K	SQW	200	1	10%FBS UM	10	400000	2	94.0789	No CFP signal above background
BioRad Gene Pulser Electroporation	LvPolyUB H2B-CFP (circular plasmid)	4	T+K	SQW	300	1	10%FBS UM	5	400000	2	63.6364	No CFP signal above background
BioRad Gene Pulser Electroporation	LvPolyUB H2B-CFP (circular plasmid)	4	T+K	SQW	300	1	10%FBS UM	10	400000	2	44.6429	No CFP signal above background
BioRad Gene Pulser Electroporation	NPM1-RFP (mRNA)	1	BUM	SQW	50	1	5%FBS UM	1	200000	2		No RFP signal above background
BioRad Gene Pulser Electroporation	NPM1-RFP (mRNA)	1	BUM	SQW	50	1	5%FBS UM	10	200000	2		No RFP signal above background
BioRad Gene Pulser Electroporation	NPM1-RFP (mRNA)	1	BUM	SQW	100	1	5%FBS UM	1	200000	2		No RFP signal above background
BioRad Gene Pulser Electroporation	NPM1-RFP (mRNA)	1	BUM	SQW	100	1	5%FBS UM	10	200000	2		No RFP signal above background
BioRad Gene Pulser Electroporation	NPM1-RFP (mRNA)	1	BUM	SQW	200	1	5%FBS UM	1	200000	2		No RFP signal above background
BioRad Gene Pulser Electroporation	NPM1-RFP (mRNA)	1	BUM	SQW	200	1	5%FBS UM	10	200000	2		No RFP signal above background
BioRad Gene Pulser Electroporation	Dextran, Tetramethylrhodamine, 3000 MW, Anionic	2	T+K	SQW	100	3	5%FBS UM	5	500000	2		No Cy3 signal above background
BioRad Gene Pulser Electroporation	Dextran, Tetramethylrhodamine, 3000 MW, Anionic	2	T+K	SQW	300	3	5%FBS UM	5	500000	2		No Cy3 signal above background
BioRad Gene Pulser Electroporation	Dextran, Tetramethylrhodamine, 3000 MW, Anionic	2	T+K	SQW	600	3	5%FBS UM	5	500000	2		No Cy3 signal above background
BioRad Gene Pulser Electroporation	Dextran, Tetramethylrhodamine, 3000 MW, Anionic	2	T+K	SQW	900	3	5%FBS UM	5	500000	2		No Cy3 signal above background
Transfection Method	Plasmid or mRNA	Plasmid or mRNA added (ug)	PEI added (ug)	PEI:DNA by mass	Complex Formation Media	Recovery media	Number of cells	Result
Polyethylenimine (PEI)	LvPolyUB H2B-CFP (circular plasmid)	0 (mock)	1.5	N/A	BUM	10%FBS UM	400000	No CFP signal above background
Polyethylenimine (PEI)	LvPolyUB H2B-CFP (circular plasmid)	1.5	1.5	1	BUM	10%FBS UM	400000	No CFP signal above background
Polyethylenimine (PEI)	LvPolyUB H2B-CFP (circular plasmid)	1.5	3	2	BUM	10%FBS UM	400000	No CFP signal above background
Polyethylenimine (PEI)	LvPolyUB H2B-CFP (circular plasmid)	1.5	4.5	3	BUM	10%FBS UM	400000	No CFP signal above background
Polyethylenimine (PEI)	LvPolyUB H2B-CFP (circular plasmid)	1.5	6	4	BUM	10%FBS UM	400000	No CFP signal above background
Polyethylenimine (PEI)	LvPolyUB H2B-CFP (circular plasmid)	1.5	7.5	5	BUM	10%FBS UM	400000	No CFP signal above background
Polyethylenimine (PEI)	LvPolyUB H2B-CFP (circular plasmid)	0 (mock)	1	N/A	OptiMEM	10%FBS UM	400000	No CFP signal above background
Polyethylenimine (PEI)	LvPolyUB H2B-CFP (circular plasmid)	1	1	1	OptiMEM	10%FBS UM	400000	No CFP signal above background
Polyethylenimine (PEI)	LvPolyUB H2B-CFP (circular plasmid)	1	2	2	OptiMEM	10%FBS UM	400000	No CFP signal above background
Polyethylenimine (PEI)	LvPolyUB H2B-CFP (circular plasmid)	1	3	3	OptiMEM	10%FBS UM	400000	No CFP signal above background
Polyethylenimine (PEI)	LvPolyUB H2B-CFP (circular plasmid)	1	4	4	OptiMEM	10%FBS UM	400000	No CFP signal above background
Polyethylenimine (PEI)	LvPolyUB H2B-CFP (circular plasmid)	1	5	5	OptiMEM	10%FBS UM	400000	No CFP signal above background
