# Supplementary material for: Genetically tractable embryonic cell lines from sea urchins
Source: Research Square preprint supplement (doi:10.21203/rs.3.rs-5665288/v1), 2025-01-15
Supplement: Supplementary file 11 [file dab11da32839a1bbdbcdfa56.xlsx]

## Sheet: Lv_CodonBiasTable-CM-Supp
Table S9 – Codon usage analysis of the L. variegatus exome used to create a codon-optimized dual reporter lentiviral vector
codon	prop total	count	AA	cod/AA	ct/AA	expected	Codon Usage Bias (CUB)
AAA	13.9537	415415	K	2	933915	466958	0.89
AAC	11.8505	352800	N	2	720888	360444	0.98
AAG	17.4163	518500	K	2	933915	466958	1.11
AAT	12.364	368088	N	2	720888	360444	1.02
ACA	11.5283	343209	T	4	1016549	254137	1.35
ACC	9.29613	276755	T	4	1016549	254137	1.09
ACG	5.00453	148990	T	4	1016549	254137	0.59
ACT	8.31665	247595	T	4	1016549	254137	0.97
AGA	9.26294	275767	R	6	891245	148541	1.86
AGC	7.24645	215734	S	6	1421053	236842	0.91
AGG	7.23187	215300	R	6	891245	148541	1.45
AGT	8.89486	264809	S	6	1421053	236842	1.12
ATA	6.65305	198068	I	3	862465	287488	0.69
ATC	13.0451	388367	I	3	862465	287488	1.35
ATG	13.4866	401510	M	1	401510	401510	1
ATT	9.27177	276030	I	3	862465	287488	0.96
CAA	10.8471	322928	Q	2	706178	353089	0.91
CAC	5.54902	165200	H	2	406390	203195	0.81
CAG	12.8733	383250	Q	2	706178	353089	1.09
CAT	8.10151	241190	H	2	406390	203195	1.19
CCA	10.8766	323807	P	4	883085	220771	1.47
CCC	5.49283	163527	P	4	883085	220771	0.74
CCG	3.9385	117253	P	4	883085	220771	0.53
CCT	9.35467	278498	P	4	883085	220771	1.26
CGA	3.85583	114792	R	6	891245	148541	0.77
CGC	2.77135	82506	R	6	891245	148541	0.56
CGG	2.74388	81688	R	6	891245	148541	0.55
CGT	4.07081	121192	R	6	891245	148541	0.82
CTA	5.70189	169751	L	6	1368929	228155	0.74
CTC	8.84488	263321	L	6	1368929	228155	1.15
CTG	8.8516	263521	L	6	1368929	228155	1.16
CTT	9.73357	289778	L	6	1368929	228155	1.27
GAA	19.0981	568569	E	2	1083155	541578	1.05
GAC	12.9399	385233	D	2	989502	494751	0.78
GAG	17.2848	514586	E	2	1083155	541578	0.95
GAT	20.2972	604269	D	2	989502	494751	1.22
GCA	10.6539	317178	A	4	1003423	250856	1.26
GCC	8.70498	259156	A	4	1003423	250856	1.03
GCG	3.47852	103559	A	4	1003423	250856	0.41
GCT	10.8673	323530	A	4	1003423	250856	1.29
GGA	12.0351	358296	G	4	1035342	258836	1.38
GGC	6.32512	188305	G	4	1035342	258836	0.73
GGG	5.72544	170452	G	4	1035342	258836	0.66
GGT	10.6912	318289	G	4	1035342	258836	1.23
GTA	6.7643	201380	V	4	1017051	254263	0.79
GTC	9.59454	285639	V	4	1017051	254263	1.12
GTG	8.62329	256724	V	4	1017051	254263	1.01
GTT	9.18034	273308	V	4	1017051	254263	1.07
TAA	0.330154	9829	STOP	3	29722	9907.33	0.99
TAC	8.41067	250394	Y	2	466958	233479	1.07
TAG	0.243324	7244	STOP	3	29722	9907.33	0.73
TAT	7.27433	216564	Y	2	466958	233479	0.93
TCA	10.8749	323758	S	6	1421053	236842	1.37
TCC	6.8861	205006	S	6	1421053	236842	0.87
TCG	4.49531	133830	S	6	1421053	236842	0.57
TCT	9.33512	277916	S	6	1421053	236842	1.17
TGA	0.424877	12649	STOP	3	29722	9907.33	1.28
TGC	4.91952	146459	C	3	518992	172997	0.85
TGG	5.92919	176518	C	3	518992	172997	1.02
TGT	6.58409	196015	C	3	518992	172997	1.13
TTA	5.29394	157606	L	6	1368929	228155	0.69
TTC	10.7786	320891	F	2	592504	296252	1.08
TTG	7.55608	224952	L	6	1368929	228155	0.99
TTT	9.12341	271613	F	2	592504	296252	0.92
